# Supplementary material for: Long Non-Coding RNA Expression Profiling of Mouse Testis during Postnatal Development
Source: PLoS One. 2013 Oct 10;8(10):e75750. doi: 10.1371/journal.pone.0075750 (PMC3794988; doi:10.1371/journal.pone.0075750)
Supplement: Table S2 — LncRNAs differentially expressed in neonatal and adult mouse testis. (XLS) [file pone.0075750.s005.xls]

## Sheet: Up-regulated
Probe ID	Gene Symbol	SeqID	p-value	FCAbsolute	Regulation	Source	Chromosome	ChromosomeStrand	txStart	txEnd
CUST_13323_PI419771968		BC100504	0.000312	17113.8	up	NRED	chr1	+	73071184	73072075
CUST_477_PI419771968		AK018942	0.000286	14097.5	up	Fantom_stringent	chr14	-	122629127	122632860
CUST_3273_PI419771968	AK015428	uc007vys	0.000264	11923.4	up	UCSC_knowngene	chr15	+	63567291	63568846
CUST_13241_PI419771968		BC049745	0.000484	11195.3	up	NRED	chr3	-	95190379	95206763
CUST_2124_PI419771968	AK006831	uc007hbx	0.000693	11002.9	up	UCSC_knowngene	chr10	+	115855176	115858291
CUST_5882_PI419771968	BC050982	uc009gzw	4.07e-05	10786.6	up	UCSC_knowngene	chr7	+	54242189	54243166
CUST_5066_PI419771968	AK131719	uc008vov	0.000558	10350.8	up	UCSC_knowngene	chr4	+	141170284	141171519
CUST_3771_PI419771968	AK005780	uc008cye	0.00140428	10303.7	up	UCSC_knowngene	chr17	-	49251588	49252840
CUST_3522_PI419771968	AK076728	uc007zkk	0.000552	10145.8	up	UCSC_knowngene	chr16	+	49955942	49959025
CUST_105_PI419771968		AK005929	0.000398	10012.2	up	Fantom_stringent	chr2	+	130415172	130415742
CUST_5473_PI419771968	AK006052	uc009aym	0.00244334	8952.79	up	UCSC_knowngene	chr6	+	13363338	13365995
CUST_125_PI419771968		AK006669	0.00052	8570.38	up	Fantom_stringent	chr9	+	57023081	57033910
CUST_2958_PI419771968	AK006024	uc007sdp	0.000427	8168.08	up	UCSC_knowngene	chr14	-	7515365	7516746
CUST_5881_PI419771968	AK076952	uc009gzv	7.29e-05	7785.98	up	UCSC_knowngene	chr7	+	54238984	54243166
CUST_13698_PI419771968	1700013N18Rik	NR_003639	0.000698	7686.46	up	RefSeq_NR	chr5	+	108259271	108260783
CUST_4193_PI419771968	AK006852	uc008igz	0.000793	7261.96	up	UCSC_knowngene	chr2	+	9111141	9119104
CUST_3543_PI419771968	AK005838	uc007zqm	3.75e-05	7011.26	up	UCSC_knowngene	chr16	+	66657362	66664869
CUST_478_PI419771968		AK018981	9.5e-05	6772.79	up	Fantom_stringent	chr10	+	56224306	56225093
CUST_2312_PI419771968	AK006752	uc007jyo	0.000749	6416.04	up	UCSC_knowngene	chr11	+	72079922	72082059
CUST_13460_PI419771968	1700123L14Rik	NR_003643	0.000331	6062.88	up	RefSeq_NR	chr6	-	96114496	96116199
CUST_5093_PI419771968	AK017048	uc008vyo	0.000137	6006.92	up	UCSC_knowngene	chr4	+	150750578	150753691
CUST_5141_PI419771968	AK016172	uc008wlp	0.000487	5864.99	up	UCSC_knowngene	chr5	-	11109799	11126455
CUST_2467_PI419771968	AK005912	uc007mef	0.000577	5773.27	up	UCSC_knowngene	chr11	-	112684278	112686421
CUST_134_PI419771968		AK006844	0.000598	5753.09	up	Fantom_stringent	chr6	+	124322179	124324823
CUST_1913_PI419771968	AK006633	uc007ejk	0.00135703	5583.25	up	UCSC_knowngene	chr10	+	10468727	10475448
CUST_1914_PI419771968	BC049706	uc007ejl	0.00119485	5379.08	up	UCSC_knowngene	chr10	+	10470843	10475448
CUST_5234_PI419771968	BC099582	uc008xlx	0.00160103	5183.01	up	UCSC_knowngene	chr5	-	60354362	60377241
CUST_6822_PI419771968	AK006653	uc009vft	0.00244306	5152.22	up	UCSC_knowngene	chrY_random	-	7178329	7201984
CUST_1671_PI419771968	AK005643	uc007baq	0.000648	5061.88	up	UCSC_knowngene	chr1	+	56075821	56077047
CUST_476_PI419771968		AK018932	0.000531	4911.41	up	Fantom_stringent	chr7	+	3932759	3934479
CUST_5834_PI419771968	AK006470(Scgb2b1-ps)	uc009gil	0.00154827	4779.89	up	UCSC_knowngene	chr7	-	34410163	34438300
CUST_9790_PI419771968		AK034299	0.000832	4701.58	up	NRED	chr2	+	131387102	131388919
CUST_3449_PI419771968	AK016605	uc007yja	0.000359	4697.61	up	UCSC_knowngene	chr16	-	16707706	16718189
CUST_1747_PI419771968	AK076805	uc007cgb	0.000389	4466.51	up	UCSC_knowngene	chr1	+	103052385	103071723
CUST_907_PI419771968		AK076832	0.00108516	4382.51	up	Fantom_stringent	chr10	+	53000086	53003492
CUST_13220_PI419771968		BC048565	0.000307	4363.27	up	NRED	chr2	+	168803768	168804403
CUST_5795_PI419771968	EG545936	uc009fqn	0.00026	4249.41	up	UCSC_knowngene	chr7	+	25603813	25625294
CUST_412_PI419771968		AK016723	0.00352756	4071.86	up	Fantom_stringent	chr9	+	51722531	51724092
CUST_1643_PI419771968	BC048628	uc007atp	0.000371	3966.63	up	UCSC_knowngene	chr1	-	39899272	39904175
CUST_3519_PI419771968	AK006389	uc007zke	0.00552001	3867.01	up	UCSC_knowngene	chr16	-	49210753	49255885
CUST_118_PI419771968		AK006530	0.000511	3718.22	up	Fantom_stringent	chr11	+	23397756	23399640
CUST_7164_PI419771968		AK007098	0.000198	3711.96	up	NRED	chr6	-	81844108	81845333
CUST_5689_PI419771968	AK006412	uc009dqq	0.000937	3658.15	up	UCSC_knowngene	chr6	-	124313318	124314537
CUST_5402_PI419771968	AK018902	uc008zrz	0.00100961	3633.51	up	UCSC_knowngene	chr5	-	127737231	127761993
CUST_11690_PI419771968		AK076915	0.00135355	3581.94	up	NRED	chr6	-	81843811	81844623
CUST_1976_PI419771968	AK005653	uc007fbl	9.1e-05	3578.21	up	UCSC_knowngene	chr10	-	52997850	52999954
CUST_11685_PI419771968		AK076741	3.12e-05	3409.92	up	NRED	chr7	-	80945358	80947456
CUST_2598_PI419771968	AK016427	uc007nsv	0.000143	3349.48	up	UCSC_knowngene	chr12	+	70944672	70954658
CUST_7065_PI419771968		AK006660	0.000738	3285.69	up	NRED	chr1	+	154783733	154784171
CUST_1830_PI419771968	AK006507	uc007dit	0.00128021	3228.86	up	UCSC_knowngene	chr1	+	166891051	166891530
CUST_7178_PI419771968		AK007144	0.00139739	3214.41	up	NRED	chr2	+	144157524	144158374
CUST_7032_PI419771968		AK006406	0.000505	3192.01	up	NRED	chr1	+	73062609	73072072
CUST_6322_PI419771968	AK076897	uc009nkt	0.00096	3190.32	up	UCSC_knowngene	chr8	-	113019265	113026256
CUST_4938_PI419771968	AK015482	uc008tlv	0.000234	3161.68	up	UCSC_knowngene	chr4	+	86204349	86205708
CUST_13267_PI419771968		BC055113	8.68e-05	3131.53	up	NRED	chr1	+	57184591	57186244
CUST_13472_PI419771968	Aldoart2	NR_003959	0.000224	3123.38	up	RefSeq_NR	chr12	+	56666121	56667696
CUST_6519_PI419771968	BC050972	uc009qfh	0.00056	3087.41	up	UCSC_knowngene	chr9	-	66646751	66652144
CUST_7818_PI419771968		AK015139	0.00167298	3059.55	up	NRED	chr19	-	45046606	45059040
CUST_2531_PI419771968	AK007110	uc007mza	0.000525	3054.61	up	UCSC_knowngene	chr12	-	7378863	7387136
CUST_385_PI419771968		AK015330	0.000451	2948.45	up	Fantom_stringent	chr5	-	11485334	11501452
CUST_2914_PI419771968	AK007100	uc007rsc	0.000645	2941.62	up	UCSC_knowngene	chr13	+	103550343	103551976
CUST_6995_PI419771968		AK006169	0.00138793	2878.57	up	NRED	chr10	+	63263618	63264101
CUST_2863_PI419771968	AK007102	uc007rcu	0.000162	2792.76	up	UCSC_knowngene	chr13	+	70712118	70714982
CUST_5294_PI419771968	AK076930	uc008ygq	0.00248433	2768.47	up	UCSC_knowngene	chr5	+	100111457	100119341
CUST_6963_PI419771968		AK005964	0.00111313	2767.59	up	NRED	chr5	-	102908226	102909013
CUST_5398_PI419771968	AK006725	uc008zru	0.000124	2644.24	up	UCSC_knowngene	chr5	+	126409148	126433000
CUST_7054_PI419771968		AK006618	0.00112852	2633.64	up	NRED	chr4	-	136672624	136673497
CUST_4105_PI419771968	AK018976	uc008hip	0.000937	2631.3	up	UCSC_knowngene	chr19	+	37539743	37546317
CUST_5146_PI419771968	AK015844	uc008wmv	0.00108739	2628.54	up	UCSC_knowngene	chr5	-	15373023	15389647
CUST_4777_PI419771968	AK005639	uc008rft	7.22e-05	2595.49	up	UCSC_knowngene	chr3	-	124276137	124284009
CUST_11689_PI419771968		AK076893	5.56e-05	2576.91	up	NRED	chr14	+	58508658	58509673
CUST_4445_PI419771968	AK006376	uc008mmu	0.00107884	2496.57	up	UCSC_knowngene	chr2	+	132316463	132349793
CUST_13643_PI419771968	Gm5334	NR_003648	0.000419	2448.59	up	RefSeq_NR	chr7	+	75763341	75764895
CUST_2144_PI419771968	AK019561	uc007hen	0.00115745	2311.43	up	UCSC_knowngene	chr10	-	119284230	119287695
CUST_5461_PI419771968	AK076963	uc009avw	4.86e-05	2257.3	up	UCSC_knowngene	chr6	-	4757059	4766328
CUST_3566_PI419771968	AK019797	uc007zsu	0.000619	2223.53	up	UCSC_knowngene	chr16	+	78695278	78709325
CUST_3555_PI419771968	AK077115	uc007zsa	0.000847	2191.27	up	UCSC_knowngene	chr16	-	77004472	77011126
CUST_6123_PI419771968	AK007249	uc009kuf	0.00158132	2190.52	up	UCSC_knowngene	chr8	+	8661800	8664728
CUST_2861_PI419771968	AK006991	uc007rcs	1.79e-05	2165.41	up	UCSC_knowngene	chr13	-	70142927	70167226
CUST_115_PI419771968		AK006377	0.00233129	2158.4	up	Fantom_stringent	chr16	-	10796421	10796916
CUST_3632_PI419771968	Gm1604	uc008aiu	0.00053	2092.92	up	UCSC_knowngene	chr17	-	8175388	8294068
CUST_8033_PI419771968		AK015829	0.00301874	2082.73	up	NRED	chr1	+	158233626	158235090
CUST_5175_PI419771968	BC049642	uc008wtg	0.0100282	2068.63	up	UCSC_knowngene	chr5	-	26786609	26819829
CUST_3627_PI419771968	AK007238	uc008ahx	0.000887	2064.57	up	UCSC_knowngene	chr17	+	7100288	7106066
CUST_7209_PI419771968		AK007287	0.00160627	2043.75	up	NRED	chr1	+	57184183	57186245
CUST_2628_PI419771968	AK018974	uc007obk	9.54e-06	1980.12	up	UCSC_knowngene	chr12	-	82024422	82025434
CUST_8807_PI419771968		AK019660	0.00151076	1952.77	up	NRED	chr2	+	151158017	151158316
CUST_4543_PI419771968	BC049717	uc008och	0.000498	1926.44	up	UCSC_knowngene	chr2	+	171078783	171096850
CUST_8784_PI419771968		AK019586	0.00247908	1900.5	up	NRED	chr16	-	69796385	69800626
CUST_2349_PI419771968	AK005634	uc007knx	0.00600661	1892.71	up	UCSC_knowngene	chr11	-	82755845	82774159
CUST_8095_PI419771968		AK016056	6.79e-05	1850.26	up	NRED	chr13	-	69910395	69911510
CUST_3792_PI419771968	AK006039	uc008dkd	0.00146871	1846.77	up	UCSC_knowngene	chr17	+	67063795	67069825
CUST_6075_PI419771968	AK007216	uc009kea	9.57e-05	1830.66	up	UCSC_knowngene	chr7	-	142383447	142387685
CUST_13239_PI419771968		BC049716	0.0008	1830.04	up	NRED	chr6	-	127726100	127728683
CUST_2987_PI419771968	AK019699	uc007srg	0.000532	1825.13	up	UCSC_knowngene	chr14	+	25441359	25442082
CUST_3979_PI419771968	DQ284430	uc008fqj	0.000411	1824.08	up	UCSC_knowngene	chr18	-	76173864	76175331
CUST_5401_PI419771968	AK016281	uc008zrx	0.000321	1822.84	up	UCSC_knowngene	chr5	+	127650934	127664726
CUST_6772_PI419771968	AK076884	uc009ueo	0.000412	1820.21	up	UCSC_knowngene	chrX	-	120324028	120326912
CUST_2002_PI419771968	AK076946	uc007fkm	0.0045303	1758.36	up	UCSC_knowngene	chr10	-	65338535	65370987
CUST_1894_PI419771968	AK006895	uc007edr	0.00264516	1752.85	up	UCSC_knowngene	chr1	+	194668496	194668933
CUST_475_PI419771968		AK018927	0.000805	1734.34	up	Fantom_stringent	chr19	+	46469869	46470437
CUST_6580_PI419771968	AK014999	uc009rdf	0.000287	1695.56	up	UCSC_knowngene	chr9	+	97903838	97906188
CUST_3995_PI419771968	AK077183	uc008fud	0.00109517	1690.36	up	UCSC_knowngene	chr18	-	83087796	83089940
CUST_2578_PI419771968	AK016131	uc007nku	0.000568	1664.86	up	UCSC_knowngene	chr12	+	40764916	40766612
CUST_6928_PI419771968		AK005715	0.00190624	1638.32	up	NRED	chr16	-	86139548	86150921
CUST_390_PI419771968		AK015550	0.00186825	1602.07	up	Fantom_stringent	chr18	+	36265847	36269608
CUST_8089_PI419771968		AK016045	0.00145961	1600.15	up	NRED	chr18	-	17727254	17739499
CUST_5375_PI419771968	AK006202	uc008zgx	0.00525659	1585.29	up	UCSC_knowngene	chr5	-	120255337	120257878
CUST_5356_PI419771968	AK006812	uc008ytp	0.0105406	1572.69	up	UCSC_knowngene	chr5	+	113222311	113230718
CUST_7093_PI419771968		AK006765	8.88e-05	1556.59	up	NRED	chr17	+	78973284	78976911
CUST_5057_PI419771968	AK007084	uc008vke	0.000745	1550.03	up	UCSC_knowngene	chr4	-	137693509	137694433
CUST_5464_PI419771968	AK006121	uc009awo	0.0047439	1526.59	up	UCSC_knowngene	chr6	-	5913899	5927359
CUST_7142_PI419771968		AK006982	0.00464565	1501.92	up	NRED	chr19	-	46339028	46342159
CUST_5145_PI419771968	AK076692	uc008wmu	0.00165987	1498.09	up	UCSC_knowngene	chr5	-	15369745	15389647
CUST_146_PI419771968		AK007128	8.93e-05	1495.88	up	Fantom_stringent	chr19	+	56140617	56141424
CUST_4083_PI419771968	AK076909	uc008hbp	0.00376775	1483.5	up	UCSC_knowngene	chr19	-	26695241	26697900
CUST_3755_PI419771968	AK006933	uc008cph	0.000565	1465.63	up	UCSC_knowngene	chr17	-	43728108	43729381
CUST_13585_PI419771968	Ube2dnl	NR_003645	0.00572896	1459.56	up	RefSeq_NR	chrX	+	112018620	112019550
CUST_2427_PI419771968	BC048585	uc007lpo	0.00112892	1447.01	up	UCSC_knowngene	chr11	+	101472013	101477270
CUST_399_PI419771968		AK016091	0.00127498	1433.94	up	Fantom_stringent	chr13	-	31659265	31674382
CUST_6552_PI419771968	AK006870	uc009qvr	0.00175618	1409.89	up	UCSC_knowngene	chr9	+	82153899	82157092
CUST_4318_PI419771968	AK029663	uc008kcx	0.000389	1375.4	up	UCSC_knowngene	chr2	+	73399130	73403430
CUST_2216_PI419771968	AK019722	uc007ify	0.000565	1317.24	up	UCSC_knowngene	chr11	-	24066876	24072824
CUST_6529_PI419771968	AK006167	uc009qow	3.16e-05	1310.44	up	UCSC_knowngene	chr9	-	71011281	71015440
CUST_6583_PI419771968	AK015183	uc009rea	0.00031	1281.66	up	UCSC_knowngene	chr9	-	99199425	99205092
CUST_5599_PI419771968	AK006896	uc009cjn	0.00065	1278.43	up	UCSC_knowngene	chr6	-	73386958	73421015
CUST_6953_PI419771968		AK005899	0.000808	1271.25	up	NRED	chr3	-	152959467	152961613
CUST_7926_PI419771968		AK015479	0.00171629	1268.69	up	NRED	chr10	+	126130489	126131593
CUST_122_PI419771968		AK006593	7.37e-05	1265.37	up	Fantom_stringent	chr5	-	113011955	113019016
CUST_8037_PI419771968		AK015838	0.000259	1251.24	up	NRED	chr13	+	30706911	30716128
CUST_7210_PI419771968		AK007300	0.00121413	1244.05	up	NRED	chr18	-	68634366	68634866
CUST_4124_PI419771968	AK006610	uc008hnr	0.0145382	1242.12	up	UCSC_knowngene	chr19	-	42636991	42637598
CUST_7853_PI419771968		AK015238	5.86e-05	1237.05	up	NRED	chr7	+	80455415	80456839
CUST_7930_PI419771968		AK015494	0.00073	1224.59	up	NRED	chr18	-	27075231	27076598
CUST_8821_PI419771968		AK019708	0.000567	1215.11	up	NRED	chr10	-	116626903	116627323
CUST_4481_PI419771968	AK006531	uc008nfy	0.000603	1180.59	up	UCSC_knowngene	chr2	-	152478618	152480066
CUST_9423_PI419771968		AK030044	0.000674	1171.99	up	NRED	chr10	-	67031269	67034737
CUST_1629_PI419771968	AK016244	uc007aou	0.00145452	1160.82	up	UCSC_knowngene	chr1	-	34534219	34542456
CUST_2794_PI419771968	AK006512	uc007qgq	0.00161713	1154.45	up	UCSC_knowngene	chr13	+	44535095	44552936
CUST_7167_PI419771968		AK007108	0.00247589	1143.39	up	NRED	chr1	-	34636046	34636456
CUST_4007_PI419771968	AK006563	uc008fvy	0.00071	1140.93	up	UCSC_knowngene	chr19	-	3153210	3197714
CUST_3103_PI419771968	AK006644	uc007ude	5.54e-05	1140.89	up	UCSC_knowngene	chr14	+	58190450	58191205
CUST_8801_PI419771968		AK019648	0.00281674	1134.39	up	NRED	chr7	-	31132663	31138340
CUST_7104_PI419771968		AK006832	0.000283	1104.9	up	NRED	chr2	-	132315409	132316359
CUST_5169_PI419771968	AK016926	uc008wso	0.000258	1104.67	up	UCSC_knowngene	chr5	+	24408386	24412665
CUST_7752_PI419771968		AK014881	0.00119833	1099.46	up	NRED	chr6	-	127726101	127728339
CUST_7143_PI419771968		AK006983	0.0016299	1095.7	up	NRED	chr12	-	72484140	72485195
CUST_8071_PI419771968		AK015977	0.000136	1087.1	up	NRED	chr3	-	68563830	68565355
CUST_7770_PI419771968		AK014973	0.0085086	1075.48	up	NRED	chr3	-	124101003	124102676
CUST_5581_PI419771968	AK029641	uc009cea	0.00043	1055.57	up	UCSC_knowngene	chr6	-	63274665	63278435
CUST_7155_PI419771968		AK007034	0.00210715	1045.43	up	NRED	chr4	-	132988654	132988898
CUST_4384_PI419771968	AK006310	uc008lmt	0.000861	1039	up	UCSC_knowngene	chr2	-	109871406	109890636
CUST_913_PI419771968		AK076940	0.000582	1036.14	up	Fantom_stringent	chr10	-	21061170	21061826
CUST_8342_PI419771968		AK017073	0.00108556	1035.83	up	NRED	chr2	-	102763088	102763897
CUST_8235_PI419771968		AK016610	0.000572	1035.71	up	NRED	chr7	+	47930106	47946630
CUST_4149_PI419771968	AK018858	uc008hwh	0.000506	1005.02	up	UCSC_knowngene	chr19	+	53150741	53158882
CUST_5088_PI419771968	AK007223	uc008vwe	0.000976	1001.48	up	UCSC_knowngene	chr4	+	148708747	148710006
CUST_3262_PI419771968	AK076851	uc007vwv	0.00179541	998.379	up	UCSC_knowngene	chr15	+	59106950	59123501
CUST_117_PI419771968		AK006482	0.000521	992.475	up	Fantom_stringent	chr7	+	138289957	138294092
CUST_7931_PI419771968		AK015499	0.000285	973.651	up	NRED	chr12	+	102387316	102387968
CUST_13604_PI419771968	4921511C20Rik	NR_003646	0.00168924	969.223	up	RefSeq_NR	chrX	+	123928824	123930430
CUST_5074_PI419771968	AK161354	uc008vsf	1.5e-05	968.23	up	UCSC_knowngene	chr4	+	145651140	145655251
CUST_4630_PI419771968	AK006766	uc008pcg	0.000617	949.906	up	UCSC_knowngene	chr3	+	41158068	41173053
CUST_7799_PI419771968		AK015101	3.84e-05	949.36	up	NRED	chr5	-	113749473	113750726
CUST_7052_PI419771968		AK006615	0.0018896	946.02	up	NRED	chrX	+	64711370	64712378
CUST_7082_PI419771968		AK006720	0.00244727	939.326	up	NRED	chr7	+	13366208	13366951
CUST_3274_PI419771968	AK006996	uc007vyv	0.0022364	937.736	up	UCSC_knowngene	chr15	+	63648742	63651095
CUST_13491_PI419771968	4930488L21Rik	NR_026888	0.0150704	937.683	up	RefSeq_NR	chr8	-	96335593	96337455
CUST_2147_PI419771968	BC098228	uc007hfc	7.76e-06	922.595	up	UCSC_knowngene	chr10	+	119801226	119819892
CUST_5680_PI419771968	AK006540	uc009dkx	0.0056403	912.023	up	UCSC_knowngene	chr6	-	117629226	117701787
CUST_4744_PI419771968	AK016162	uc008qtk	0.000564	910.185	up	UCSC_knowngene	chr3	+	103575895	103593325
CUST_4008_PI419771968	AK007025	uc008fvz	0.000577	910.119	up	UCSC_knowngene	chr19	-	3153798	3197714
CUST_5265_PI419771968	AK018948	uc008xvs	0.000881	908.017	up	UCSC_knowngene	chr5	-	77435473	77447888
CUST_2148_PI419771968	AK076916	uc007hff	0.000105	906.9	up	UCSC_knowngene	chr10	+	120202787	120211535
CUST_8772_PI419771968		AK019553	0.00074	905.846	up	NRED	chr1	+	132319400	132334491
CUST_468_PI419771968		AK018844	0.000353	897.74	up	Fantom_stringent	chr5	-	150825053	150825318
CUST_6992_PI419771968		AK006151	0.000497	896.714	up	NRED	chr12	-	27256972	27287174
CUST_7101_PI419771968		AK006818	0.000472	893.59	up	NRED	chr10	-	62705821	62706896
CUST_4557_PI419771968	AK005811	uc008oeh	0.000136	877.171	up	UCSC_knowngene	chr2	+	173544954	173547587
CUST_128_PI419771968		AK006712	0.000874	860.519	up	Fantom_stringent	chr13	+	24997468	24999149
CUST_8016_PI419771968		AK015779	0.000887	852.929	up	NRED	chr5	-	39853803	39994807
CUST_13598_PI419771968	1700020N18Rik	NR_026924	0.0010331	849.037	up	RefSeq_NR	chr1	-	93301456	93302606
CUST_1836_PI419771968	AK016078	uc007djs	6.33e-05	847.23	up	UCSC_knowngene	chr1	+	167794785	167807407
CUST_397_PI419771968		AK015998	0.000281	838.813	up	Fantom_stringent	chr14	+	60706353	60714921
CUST_3567_PI419771968	AK019711	uc007ztc	0.00743457	830.736	up	UCSC_knowngene	chr16	+	84680033	84685392
CUST_7918_PI419771968		AK015455	0.00189481	825.199	up	NRED	chr8	+	9144668	9149050
CUST_7976_PI419771968		AK015632	0.00429882	819.659	up	NRED	chr1	+	20346534	20382381
CUST_5147_PI419771968	AK076902	uc008wnt	0.000258	818.801	up	UCSC_knowngene	chr5	-	17987522	18001078
CUST_7006_PI419771968		AK006238	0.0057949	812.26	up	NRED	chr12	-	29154734	29155488
CUST_8137_PI419771968		AK016161	0.0120735	803.504	up	NRED	chr13	-	23368072	23405269
CUST_6957_PI419771968		AK005916	0.000548	803.269	up	NRED	chr6	+	7716393	7727681
CUST_8265_PI419771968		AK016768	0.000281	799.916	up	NRED	chr1	+	50164315	50165804
CUST_5926_PI419771968	AK133139	uc009hqx	0.00300069	799.266	up	UCSC_knowngene	chr7	+	80455265	80460079
CUST_7827_PI419771968		AK015163	0.000528	791.935	up	NRED	chr19	+	24490501	24505176
CUST_6002_PI419771968	AK016243	uc009jad	0.00133468	790.242	up	UCSC_knowngene	chr7	-	113953444	113957616
CUST_8147_PI419771968		AK016211	0.00434376	789.637	up	NRED	chr13	-	113868313	113869355
CUST_4766_PI419771968	AK076759	uc008rde	0.00372641	769.99	up	UCSC_knowngene	chr3	+	118136853	118176153
CUST_2215_PI419771968	AK019630	uc007ifx	0.00129712	768.504	up	UCSC_knowngene	chr11	-	24060527	24072824
CUST_3146_PI419771968	AK076702	uc007uro	0.00304407	755.259	up	UCSC_knowngene	chr14	+	77077385	77080194
CUST_2200_PI419771968	AK006701	uc007ibh	0.0112596	753.501	up	UCSC_knowngene	chr11	-	14460357	14499205
CUST_2868_PI419771968	AK007185	uc007rdc	0.000306	750.599	up	UCSC_knowngene	chr13	+	71625053	71750157
CUST_127_PI419771968		AK006696	6.42e-05	749.742	up	Fantom_stringent	chr18	+	49682942	49684089
CUST_8034_PI419771968		AK015830	0.00122008	748.812	up	NRED	chr8	-	58944420	58963765
CUST_8180_PI419771968		AK016331	0.00038	747.026	up	NRED	chr8	-	84189803	84190986
CUST_7009_PI419771968		AK006266	7.46e-05	746.78	up	NRED	chr7	-	88357073	88358059
CUST_4825_PI419771968	AK015610	uc008rtv	0.000834	744.773	up	UCSC_knowngene	chr3	-	152810906	152815072
CUST_3109_PI419771968	AK007149	uc007uft	0.000116	735.704	up	UCSC_knowngene	chr14	-	61911819	61924171
CUST_103_PI419771968		AK005844	0.000396	735.262	up	Fantom_stringent	chr10	-	18538328	18551721
CUST_2948_PI419771968	AK015236	uc007sap	0.000398	732.19	up	UCSC_knowngene	chr14	-	3186100	3262328
CUST_8834_PI419771968		AK019755	0.00421223	713.292	up	NRED	chr5	+	149301516	149302019
CUST_8198_PI419771968		AK016406	0.00227085	712.903	up	NRED	chr13	-	23401299	23402038
CUST_7832_PI419771968		AK015185	0.00112521	709.513	up	NRED	chr10	-	68789927	68790919
CUST_1933_PI419771968	AK015099	uc007enq	0.00420371	708.426	up	UCSC_knowngene	chr10	-	19919052	19921644
CUST_3421_PI419771968	AK005958	uc007xzn	0.000552	702.791	up	UCSC_knowngene	chr16	-	4219911	4228058
CUST_8842_PI419771968		AK019767	0.00023	700.144	up	NRED	chr3	-	5512994	5515333
CUST_379_PI419771968		AK014936	0.00657686	697.454	up	Fantom_stringent	chr3	+	117672047	117676442
CUST_129_PI419771968		AK006751	0.000913	692.739	up	Fantom_stringent	chr14	+	54873446	54873742
CUST_383_PI419771968		AK015232	0.000196	689.772	up	Fantom_stringent	chr14	+	71820818	71821418
CUST_4150_PI419771968	AK005607	uc008hwn	0.000254	686.247	up	UCSC_knowngene	chr19	-	53323265	53329688
CUST_2614_PI419771968	AK007020	uc007nww	7.7e-05	685.139	up	UCSC_knowngene	chr12	+	75385267	75396932
CUST_138_PI419771968		AK006915	0.000461	679.917	up	Fantom_stringent	chr11	-	75407761	75408241
CUST_3127_PI419771968	AK007038	uc007uma	7.15e-05	664.239	up	UCSC_knowngene	chr14	-	69782855	69789900
CUST_3174_PI419771968	AK015429	uc007uxt	5.46e-05	653.118	up	UCSC_knowngene	chr14	+	105898004	105904839
CUST_13226_PI419771968		BC048633	0.000544	652.341	up	NRED	chr14	+	60705907	60714916
CUST_3135_PI419771968	AK076894	uc007upd	0.00237396	650.972	up	UCSC_knowngene	chr14	+	71651090	71670858
CUST_8143_PI419771968		AK016189	0.000393	648.537	up	NRED	chr9	+	79536582	79538714
CUST_8287_PI419771968		AK016855	0.00120572	633.094	up	NRED	chr4	+	122638551	122640718
CUST_3652_PI419771968	AK008572	uc008amm	1.94e-05	631.479	up	UCSC_knowngene	chr17	-	13849454	13850191
CUST_7117_PI419771968		AK006863	6.84e-05	623.053	up	NRED	chr17	+	91487832	91488731
CUST_7929_PI419771968		AK015487	0.000278	621.024	up	NRED	chr10	+	95688840	95711342
CUST_7179_PI419771968		AK007157	0.00176301	618.485	up	NRED	chr17	+	10517466	10522172
CUST_6968_PI419771968		AK005995	0.00131128	617.998	up	NRED	chr15	+	53453210	53453797
CUST_5352_PI419771968	AK006451	uc008ysj	0.000954	617.596	up	UCSC_knowngene	chr5	+	112635825	112639018
CUST_8123_PI419771968		AK016132	0.000442	610.148	up	NRED	chr13	-	73343540	73366548
CUST_5107_PI419771968	AK030206	uc008wcc	0.000244	607.579	up	UCSC_knowngene	chr4	-	154239028	154243596
CUST_2669_PI419771968	AK076979	uc007ovb	0.00827485	606.157	up	UCSC_knowngene	chr12	-	104550577	104552979
CUST_11765_PI419771968		AK078302	0.0017825	605.594	up	NRED	chr11	+	53244073	53244859
CUST_3254_PI419771968	BC048519	uc007vrs	0.0022843	603.943	up	UCSC_knowngene	chr15	-	54812887	54818418
CUST_7027_PI419771968		AK006385	0.00229337	600.939	up	NRED	chr10	-	19890918	19895141
CUST_6424_PI419771968	AK076840	uc009osk	0.000653	599.662	up	UCSC_knowngene	chr9	-	34396112	34396889
CUST_3650_PI419771968	Smok4a	uc008amk	0.00269173	590.232	up	UCSC_knowngene	chr17	+	13714321	13721299
CUST_2585_PI419771968	AK006560	uc007nnq	0.00227821	581.042	up	UCSC_knowngene	chr12	-	54404338	54410833
CUST_8710_PI419771968		AK018837	0.000166	578.854	up	NRED	chr16	-	3908824	3909192
CUST_6923_PI419771968		AK005648	0.00769354	570.066	up	NRED	chr14	+	72346600	72347020
CUST_11701_PI419771968		AK077096	0.000144	561.525	up	NRED	chr8	-	38166849	38168558
CUST_5684_PI419771968	AK006942	uc009dnm	0.0010576	559.077	up	UCSC_knowngene	chr6	+	120504813	120524222
CUST_6387_PI419771968	AK019792	uc009odt	0.000641	558.051	up	UCSC_knowngene	chr9	-	13091266	13105855
CUST_416_PI419771968		AK017000	0.00251778	557.159	up	Fantom_stringent	chr8	-	9125411	9132288
CUST_6998_PI419771968		AK006198	0.00341048	556.391	up	NRED	chr5	+	103775616	103777318
CUST_8228_PI419771968		AK016582	0.000119	553.838	up	NRED	chr12	+	111934173	111935326
CUST_2826_PI419771968	AK015470	uc007quf	3.86e-05	552.637	up	UCSC_knowngene	chr13	-	58842434	58863672
CUST_8797_PI419771968		AK019638	0.00292924	547.232	up	NRED	chr8	+	11678807	11682206
CUST_1912_PI419771968	AK016412	uc007ejd	0.00231008	544.022	up	UCSC_knowngene	chr10	+	9954791	9978497
CUST_2776_PI419771968	AK015940	uc007qcb	0.00163243	536.525	up	UCSC_knowngene	chr13	-	35259014	35259673
CUST_5408_PI419771968	4930579G22Rik	uc008ztq	0.00148211	536.262	up	UCSC_knowngene	chr5	+	130384409	130389658
CUST_5742_PI419771968	AK016914	uc009eqr	0.00104082	536.127	up	UCSC_knowngene	chr6	+	144621387	144642352
CUST_11706_PI419771968		AK077216	0.00243531	533.83	up	NRED	chr7	+	133539371	133541259
CUST_7279_PI419771968		AK008823	0.00106434	532.983	up	NRED	chr3	+	150957125	150958464
CUST_4673_PI419771968	BC048678	uc008pqo	0.00175688	532.401	up	UCSC_knowngene	chr3	+	85121440	85135949
CUST_8175_PI419771968		AK016315	0.00118691	531.749	up	NRED	chr6	-	143482484	143484028
CUST_2137_PI419771968	AK076673	uc007hdh	0.00013	531.707	up	UCSC_knowngene	chr10	-	116883079	116884491
CUST_1745_PI419771968	Slco6d1(AK133206)	uc007cfw	7.67e-05	526.419	up	UCSC_knowngene	chr1	+	100317703	100413565
CUST_7087_PI419771968		AK006735	0.000253	523.985	up	NRED	chr10	-	68366951	68367238
CUST_6933_PI419771968		AK005742	0.000888	523.707	up	NRED	chr8	+	72635650	72636897
CUST_6925_PI419771968		AK005676	0.00145891	512.255	up	NRED	chr3	-	136615753	136618051
CUST_7200_PI419771968		AK007234	0.00201895	510.655	up	NRED	chr12	-	107680862	107685873
CUST_6983_PI419771968		AK006073	0.000694	510.502	up	NRED	chr3	-	35155383	35175053
CUST_7160_PI419771968		AK007066	0.00357029	507.194	up	NRED	chrX	-	143589975	143590528
CUST_3783_PI419771968	AK132847	uc008dfb	0.00341304	500.466	up	UCSC_knowngene	chr17	+	59135673	59164404
CUST_8818_PI419771968		AK019703	0.000775	500.046	up	NRED	chr2	+	30659312	30662948
CUST_2007_PI419771968	AK016046	uc007fmk	0.00607154	499.224	up	UCSC_knowngene	chr10	-	67781820	67783890
CUST_7193_PI419771968		AK007211	0.00270377	498.226	up	NRED	chr8	-	90023947	90025130
CUST_7739_PI419771968		AK014799	0.00167974	493.499	up	NRED	chr15	+	63720156	63722067
CUST_149_PI419771968		AK007258	0.00210508	492.646	up	Fantom_stringent	chr15	-	90721826	90728907
CUST_6395_PI419771968	1700012B09Rik	uc009oex	0.00597215	482.187	up	UCSC_knowngene	chr9	-	14561036	14575474
CUST_5852_PI419771968	BC049735	uc009goz	5.33e-05	477.873	up	UCSC_knowngene	chr7	+	51516847	51517261
CUST_2985_PI419771968	AK076711	uc007sqx	1.85e-05	476.861	up	UCSC_knowngene	chr14	-	25194874	25196474
CUST_9401_PI419771968		AK029704	0.000752	473.375	up	NRED	chr1	-	91574063	91580469
CUST_7787_PI419771968		AK015069	0.00173222	469.287	up	NRED	chr10	-	20235132	20237970
CUST_8102_PI419771968		AK016094	0.00190782	468.064	up	NRED	chr16	+	84686720	84695951
CUST_3181_PI419771968	AK007006	uc007uyf	0.00179211	466.778	up	UCSC_knowngene	chr14	-	115339448	115345156
CUST_6634_PI419771968	AK132957	uc009ryo	0.0077599	465.048	up	UCSC_knowngene	chr9	-	115089528	115095176
CUST_2947_PI419771968	AK006947	uc007rzy	0.00197476	464.116	up	UCSC_knowngene	chr13_random	-	141204	142745
CUST_1635_PI419771968	AK016893	uc007aqy	0.000297	461.802	up	UCSC_knowngene	chr1	+	36771382	36814798
CUST_910_PI419771968		AK076878	0.00162115	450.398	up	Fantom_stringent	chr17	+	27535107	27536145
CUST_6169_PI419771968	AK018937	uc009lkg	0.00021	447.852	up	UCSC_knowngene	chr8	-	34841009	34842286
CUST_6098_PI419771968	AK016549	uc009klt	0.000118	446.189	up	UCSC_knowngene	chr7	-	148795964	148799646
CUST_6988_PI419771968		AK006117	0.000642	445.597	up	NRED	chr5	+	74304135	74311660
CUST_6433_PI419771968	AK007162	uc009ozr	0.00158271	444.584	up	UCSC_knowngene	chr9	+	40141056	40150913
CUST_2959_PI419771968	AK005712	uc007sdq	0.00419709	438.506	up	UCSC_knowngene	chr14	+	7516768	7667790
CUST_9429_PI419771968		AK030170	0.00233923	437.582	up	NRED	chr9	+	89721781	89733816
CUST_2774_PI419771968	AK132729	uc007qbk	0.000557	432.451	up	UCSC_knowngene	chr13	+	34744791	34758643
CUST_2858_PI419771968	AK076966	uc007rcg	0.00949153	432.201	up	UCSC_knowngene	chr13	+	69280106	69282838
CUST_6468_PI419771968	AK015955	uc009pjj	0.00211365	431.792	up	UCSC_knowngene	chr9	+	49326392	49376130
CUST_2134_PI419771968	AK015188	uc007hcv	0.0115366	429.11	up	UCSC_knowngene	chr10	+	116615505	116618166
CUST_4900_PI419771968	AK133250	uc008sus	0.000641	425.954	up	UCSC_knowngene	chr4	+	48009327	48013333
CUST_6725_PI419771968	AK005539	uc009tga	0.000731	422.869	up	UCSC_knowngene	chrX	+	53570830	53573841
CUST_2142_PI419771968	AK015773	uc007hee	0.000652	418.334	up	UCSC_knowngene	chr10	+	118850499	118863920
CUST_6941_PI419771968		AK005792	0.000814	417.336	up	NRED	chr6	-	81850457	81860794
CUST_6977_PI419771968		AK006042	0.000928	413.483	up	NRED	chr3	-	101229196	101230856
CUST_3698_PI419771968	AK131746	uc008bfj	0.000411	408.841	up	UCSC_knowngene	chr17	-	27236602	27238385
CUST_5248_PI419771968	AK015200	uc008xqg	0.00256403	408.432	up	UCSC_knowngene	chr5	-	68324856	68334320
CUST_3116_PI419771968	AK016511	uc007ugw	0.000369	405.884	up	UCSC_knowngene	chr14	+	63379337	63448963
CUST_8023_PI419771968		AK015803	0.000792	401.68	up	NRED	chr19	+	16855036	16856500
CUST_13684_PI419771968	1700049L16Rik	NR_003644	9.42e-05	400.933	up	RefSeq_NR	chr10	-	71442632	71443438
CUST_8247_PI419771968		AK016697	0.000468	400.809	up	NRED	chr7	-	89891877	89904154
CUST_8261_PI419771968		AK016753	0.000614	398.966	up	NRED	chr12	-	27499235	27519416
CUST_6026_PI419771968	AK016630	uc009jib	0.000217	396.763	up	UCSC_knowngene	chr7	-	121498153	121558675
CUST_13227_PI419771968		BC048639	0.000998	395.004	up	NRED	chr16	+	59553889	59554580
CUST_2724_PI419771968	AK006031	uc007pjv	0.00142006	392.584	up	UCSC_knowngene	chr13	-	5854754	5857338
CUST_3574_PI419771968	AK016163	uc007zua	0.00385884	392.404	up	UCSC_knowngene	chr16	-	87125285	87128684
CUST_2071_PI419771968	AK019657	uc007gnq	0.000483	392.186	up	UCSC_knowngene	chr10	+	85558583	85576325
CUST_1812_PI419771968	AK015950	uc007dau	0.000738	390.572	up	UCSC_knowngene	chr1	+	156102818	156117546
CUST_7956_PI419771968		AK015580	1.74e-05	388.111	up	NRED	chr18	-	36480559	36481146
CUST_8299_PI419771968		AK016885	0.000871	387.816	up	NRED	chr5	-	67109608	67111158
CUST_2246_PI419771968	AK016813	uc007itf	0.000501	386.759	up	UCSC_knowngene	chr11	-	50754215	50757243
CUST_8167_PI419771968		AK016285	0.00305851	385.64	up	NRED	chr16	+	78454955	78455574
CUST_7798_PI419771968		AK015098	0.00184234	379.627	up	NRED	chr5	+	100054854	100056081
CUST_7002_PI419771968		AK006223	0.000372	379.514	up	NRED	chr19	-	48315263	48315604
CUST_5888_PI419771968	AK006968	uc009hbz	0.000281	378.217	up	UCSC_knowngene	chr7	-	57772678	57831254
CUST_106_PI419771968		AK005945	0.000572	376.713	up	Fantom_stringent	chr3	-	154371621	154374307
CUST_6497_PI419771968	AK006934	uc009pwx	7.79e-06	375.6	up	UCSC_knowngene	chr9	+	58218310	58221990
CUST_2282_PI419771968	AK005754	uc007jjp	0.000798	367.277	up	UCSC_knowngene	chr11	+	62419267	62420525
CUST_1230_PI419771968		AK132715	0.00299528	366.178	up	Fantom_stringent	chr11	+	81400860	81407639
CUST_7072_PI419771968		AK006687	0.000183	366.13	up	NRED	chr10	-	45297293	45297924
CUST_1664_PI419771968	AK015376	uc007azt	0.00192904	365.271	up	UCSC_knowngene	chr1	+	54738572	54793660
CUST_7953_PI419771968		AK015574	0.0012485	360.63	up	NRED	chr12	-	72417851	72419017
CUST_3180_PI419771968	AK007305	uc007uyb	0.00338961	360.184	up	UCSC_knowngene	chr14	-	106816403	106885733
CUST_3941_PI419771968	AK015760	uc008ezi	0.00088	358.734	up	UCSC_knowngene	chr18	-	57705014	57711533
CUST_2344_PI419771968	AK019731	uc007kkw	0.00135677	355.751	up	UCSC_knowngene	chr11	-	79483873	79488630
CUST_147_PI419771968		AK007199	0.00066	354.373	up	Fantom_stringent	chr17	-	4120216	4122113
CUST_4773_PI419771968	AK015409	uc008rev	0.000358	354.335	up	UCSC_knowngene	chr3	-	122498008	122504898
CUST_7780_PI419771968		AK015039	0.00270053	351.34	up	NRED	chr11	-	71741972	71753624
CUST_6571_PI419771968	AK018841	uc009raw	0.00177031	350.874	up	UCSC_knowngene	chr9	-	92874762	92900571
CUST_1993_PI419771968	AK006239	uc007fgf	0.000666	350.325	up	UCSC_knowngene	chr10	-	61137536	61143003
CUST_11696_PI419771968		AK077042	0.00704126	347.564	up	NRED	chr2	+	90319392	90325241
CUST_3985_PI419771968	4930465K10Rik	uc008frr	0.00056	346.638	up	UCSC_knowngene	chr18	+	77952942	77954184
CUST_6653_PI419771968	AK016399	uc009sdk	9.21e-05	346.391	up	UCSC_knowngene	chr9	+	121496114	121523373
CUST_2237_PI419771968	AK016100	uc007ilo	0.00116417	345.128	up	UCSC_knowngene	chr11	-	39121204	39203727
CUST_4845_PI419771968	AK015191	uc008rxd	0.0141586	343.203	up	UCSC_knowngene	chr4	+	5559474	5569431
CUST_8216_PI419771968		AK016492	0.000643	341.072	up	NRED	chr6	+	118830175	118835561
CUST_6965_PI419771968		AK005981	0.00106585	338.966	up	NRED	chr8	-	18319522	18334338
CUST_13169_PI419771968		BC030462	0.00215941	337.852	up	NRED	chr3	+	17698381	17699587
CUST_6567_PI419771968	AK076783	uc009qzg	0.000435	336.479	up	UCSC_knowngene	chr9	+	88753848	88778392
CUST_3837_PI419771968	AK029878	uc008dvs	0.000877	334.49	up	UCSC_knowngene	chr17	+	89025948	89061926
CUST_4322_PI419771968	AK144266	uc008keh	0.00470356	332.845	up	UCSC_knowngene	chr2	+	74590740	74591797
CUST_8077_PI419771968		AK016005	0.00178687	332.429	up	NRED	chr8	-	8831446	8831907
CUST_13738_PI419771968	Speer5-ps1	NR_027506	0.00120575	330.464	up	RefSeq_NR	chr10	+	43935230	43939391
CUST_8330_PI419771968		AK017039	0.00204661	330.273	up	NRED	chr9	-	60950818	60953192
CUST_7843_PI419771968		AK015221	1.58e-05	327.492	up	NRED	chr14	-	105912417	105914011
CUST_1619_PI419771968	AK015384	uc007ajk	0.000274	325.493	up	UCSC_knowngene	chr1	-	16056059	16083406
CUST_8805_PI419771968		AK019653	0.00269472	321.463	up	NRED	chr16	+	18213741	18215343
CUST_7945_PI419771968		AK015556	0.000154	319.734	up	NRED	chr1	+	92655184	92655930
CUST_7173_PI419771968		AK007126	0.00101683	319.04	up	NRED	chr12	+	92208388	92209958
CUST_6542_PI419771968	AK017040	uc009qsg	9.85e-05	318.839	up	UCSC_knowngene	chr9	+	75257990	75265516
CUST_2566_PI419771968	AK076790	uc007ngy	0.00073	317.313	up	UCSC_knowngene	chr12	+	31595394	31595944
CUST_6650_PI419771968	AK019838	uc009scs	0.00468188	317.186	up	UCSC_knowngene	chr9	-	120833572	120839920
CUST_4735_PI419771968	AK015105	uc008qqt	0.00998883	312.453	up	UCSC_knowngene	chr3	+	100230361	100241676
CUST_7825_PI419771968		AK015154	0.000384	312.152	up	NRED	chr18	-	7150341	7151775
CUST_8100_PI419771968		AK016087	0.000791	308.656	up	NRED	chr2	-	72467079	72468489
CUST_7208_PI419771968		AK007286	0.00191456	308.123	up	NRED	chr9	+	50336878	50341857
CUST_8852_PI419771968		AK019814	0.00046	307.678	up	NRED	chr18	-	29607479	29656225
CUST_9399_PI419771968		AK029639	0.00163647	306.739	up	NRED	chr15	+	27786062	27786867
CUST_7974_PI419771968		AK015626	0.00147469	305.478	up	NRED	chr2	-	119720609	119722870
CUST_6824_PI419771968	AK076905	uc009vgq	0.0161118	304.68	up	UCSC_knowngene	chrY_random	-	22409077	22441162
CUST_13737_PI419771968	Speer5-ps1	NR_001582	6.6e-05	303.548	up	RefSeq_NR	chr10	+	43890252	43939391
CUST_6188_PI419771968	AK029624	uc009lrj	0.00153679	301.705	up	UCSC_knowngene	chr8	-	48830065	48835016
CUST_3913_PI419771968	mKIAA1317	uc008eth	0.00107446	299.855	up	UCSC_knowngene	chr18	+	40674731	40690949
CUST_8831_PI419771968		AK019742	0.00388956	298.345	up	NRED	chr2	-	134995308	135041352
CUST_8059_PI419771968		AK015908	0.00184892	297.786	up	NRED	chr5	+	64859296	64860249
CUST_11332_PI419771968		AK051554	0.00143151	295.644	up	NRED	chr3	+	118160576	118163628
CUST_8298_PI419771968		AK016880	0.000189	294.624	up	NRED	chr2	+	90319406	90328582
CUST_8157_PI419771968		AK016245	0.00173612	294.292	up	NRED	chr5	-	13748112	13808343
CUST_8347_PI419771968		AK017082	0.00241181	293.962	up	NRED	chr7	+	75562309	75571017
CUST_7041_PI419771968		AK006520	0.00443627	293.723	up	NRED	chr17	+	29042209	29043716
CUST_3311_PI419771968	AK019804	uc007wnq	0.0246459	291.113	up	UCSC_knowngene	chr15	+	77258441	77292396
CUST_6076_PI419771968	AK019737	uc009keb	5.73e-05	290.896	up	UCSC_knowngene	chr7	+	142588017	142591227
CUST_3363_PI419771968	AK006138	uc007xer	0.000123	285.164	up	UCSC_knowngene	chr15	-	88720940	88721943
CUST_8084_PI419771968		AK016030	8.4e-05	285.136	up	NRED	chr10	+	67248491	67249441
CUST_4328_PI419771968	AK019604	uc008kgk	0.027342	284.744	up	UCSC_knowngene	chr2	+	77889279	78034587
CUST_3422_PI419771968	AK015463	uc007xzo	0.0121292	283.973	up	UCSC_knowngene	chr16	-	4219911	4229109
CUST_7045_PI419771968		AK006559	0.000596	283.776	up	NRED	chr3	-	136098233	136112313
CUST_6918_PI419771968		AK005598	0.000349	283.5	up	NRED	chr11	-	114046752	114048091
CUST_8244_PI419771968		AK016680	0.000879	280.772	up	NRED	chr8	+	98020346	98024848
CUST_2440_PI419771968	AK018891	uc007lvm	5.66e-05	280.656	up	UCSC_knowngene	chr11	+	103500284	103510324
CUST_3029_PI419771968	AK019723	uc007tjg	0.000273	280.133	up	UCSC_knowngene	chr14	-	48376715	48377173
CUST_1741_PI419771968	AK015347	uc007cew	0.0210592	280.048	up	UCSC_knowngene	chr1	+	96694018	96699049
CUST_5851_PI419771968	BC049653	uc009gor	0.000907	277.04	up	UCSC_knowngene	chr7	-	51485299	51491492
CUST_4104_PI419771968	AK016444	uc008hij	0.0005	276.671	up	UCSC_knowngene	chr19	-	37332920	37338577
CUST_12669_PI419771968		AK133239	0.00168726	274.956	up	NRED	chr17	-	43725288	43728458
CUST_3205_PI419771968	AK028088	uc007vcl	0.00944412	274.172	up	UCSC_knowngene	chr15	-	4019225	4022032
CUST_7793_PI419771968		AK015090	0.00896761	274.075	up	NRED	chr11	-	103670708	103671312
CUST_13072_PI419771968	Tspy-ps	AJ001379	0.00327852	273.664	up	NRED	chrY	-	392206	395313
CUST_8105_PI419771968		AK016098	0.000906	273.574	up	NRED	chr4	+	52827475	52841141
CUST_4453_PI419771968	AK015749	uc008mqa	7.51e-05	271.678	up	UCSC_knowngene	chr2	+	142728700	142729308
CUST_2768_PI419771968	AK006076	uc007pzl	0.00381204	269.295	up	UCSC_knowngene	chr13	-	31657360	31674382
CUST_6628_PI419771968	AK015892	uc009rxe	0.000791	268.073	up	UCSC_knowngene	chr9	-	114250228	114273745
CUST_914_PI419771968		AK076995	0.00501075	267.755	up	Fantom_stringent	chr17	+	66542691	66549160
CUST_7056_PI419771968		AK006624	0.000732	267.681	up	NRED	chr3	-	69122080	69123210
CUST_5132_PI419771968	BC052364	uc008win	0.000137	265.173	up	UCSC_knowngene	chr5	-	5437826	5479102
CUST_13739_PI419771968	Tspy-ps	NR_027507	0.000654	263.575	up	RefSeq_NR	chrY	-	392206	395311
CUST_7115_PI419771968		AK006857	0.000372	262.988	up	NRED	chr11	+	23052139	23066375
CUST_2830_PI419771968	AK077008	uc007qvc	0.00417927	261.821	up	UCSC_knowngene	chr13	+	59835005	59838831
CUST_7198_PI419771968		AK007229	0.0204511	261.207	up	NRED	chr1	-	127086858	127094032
CUST_2782_PI419771968	BC048601	uc007qcv	0.00528064	259.986	up	UCSC_knowngene	chr13	-	37783953	37809517
CUST_6044_PI419771968	AK006348	uc009jnu	0.00141943	256.55	up	UCSC_knowngene	chr7	+	128733416	128735105
CUST_3531_PI419771968	AK015072	uc007zlj	0.00219484	255.616	up	UCSC_knowngene	chr16	-	52799620	52815857
CUST_8286_PI419771968		AK016851	0.00104094	255.429	up	NRED	chr7	-	150508679	150516555
CUST_7789_PI419771968		AK015082	0.00355768	255.304	up	NRED	chr6	-	139504081	139506130
CUST_7112_PI419771968		AK006850	0.000901	255.248	up	NRED	chr5	-	38361195	38374840
CUST_8546_PI419771968		BC048001	0.0021276	255.23	up	NRED	chr10	+	25713528	25714024
CUST_8124_PI419771968		AK016136	0.00192296	254.572	up	NRED	chr11	-	32689761	32690725
CUST_3153_PI419771968	AK015444	uc007uth	0.000418	253.882	up	UCSC_knowngene	chr14	+	80102726	80112711
CUST_3863_PI419771968	AK133007	uc008edz	0.00310997	253.39	up	UCSC_knowngene	chr18	+	17194016	17296068
CUST_8850_PI419771968		AK019811	0.0023984	252.266	up	NRED	chr11	-	59539419	59546274
CUST_8291_PI419771968		AK016867	0.000351	252.059	up	NRED	chr9	+	35088689	35093008
CUST_4600_PI419771968	AK076665	uc008orn	0.00418971	251.747	up	UCSC_knowngene	chr3	-	18241666	18361254
CUST_3912_PI419771968	mKIAA1317	uc008etg	6e-05	251.436	up	UCSC_knowngene	chr18	+	40672646	40690949
CUST_494_PI419771968		AK019622	0.00100206	249.45	up	Fantom_stringent	chr14	-	63654634	63668797
CUST_8851_PI419771968		AK019813	0.0127982	247.991	up	NRED	chr4	-	91605544	91606643
CUST_7908_PI419771968		AK015432	0.0021152	247.703	up	NRED	chr5	+	46087769	46250003
CUST_1872_PI419771968	AK019698	uc007dxz	0.000954	247.551	up	UCSC_knowngene	chr1	+	184230964	184233418
CUST_2989_PI419771968	AK016284	uc007sri	0.00112009	247.31	up	UCSC_knowngene	chr14	-	25959280	25962727
CUST_377_PI419771968		AK014831	0.000658	245.929	up	Fantom_stringent	chr12	+	112079238	112082014
CUST_7077_PI419771968		AK006707	0.000359	244.284	up	NRED	chr15	+	11896816	11899819
CUST_7858_PI419771968		AK015252	0.00261582	243.894	up	NRED	chr15	+	30968882	30973086
CUST_2930_PI419771968	AK005677	uc007run	0.000454	243.234	up	UCSC_knowngene	chr13	+	108477476	108482249
CUST_12661_PI419771968		AK132914	0.00100196	242.668	up	NRED	chr5	+	125869691	125870924
CUST_495_PI419771968		AK019783	0.000349	242.553	up	Fantom_stringent	chr2	+	35835448	35835762
CUST_1787_PI419771968	AK076660	uc007cvd	0.00327391	241.854	up	UCSC_knowngene	chr1	-	139824965	139865817
CUST_6958_PI419771968		AK005917	0.00262924	241.594	up	NRED	chr13	+	100411928	100412758
CUST_1929_PI419771968	AK015379	uc007emy	0.00141521	241.328	up	UCSC_knowngene	chr10	-	18549972	18551736
CUST_473_PI419771968		AK018904	0.00136686	239.991	up	Fantom_stringent	chr17	-	32771646	32772079
CUST_8020_PI419771968		AK015793	0.00033	237.64	up	NRED	chr4	+	140428607	140433970
CUST_4000_PI419771968	AK007073	uc008fuj	0.00237038	237.519	up	UCSC_knowngene	chr18	-	83275919	83277222
CUST_5390_PI419771968	Morn3	uc008zmz	0.00039	235.561	up	UCSC_knowngene	chr5	-	123485797	123496829
CUST_5233_PI419771968	AK006485	uc008xlw	0.0105429	235.001	up	UCSC_knowngene	chr5	+	58844277	58846531
CUST_7187_PI419771968		AK007183	0.00314042	234.827	up	NRED	chr8	+	98075698	98076202
CUST_6969_PI419771968		AK005997	0.000154	234.607	up	NRED	chr8	-	36771640	36771980
CUST_3436_PI419771968	DQ072382	uc007yei	0.00623424	233.729	up	UCSC_knowngene	chr16	+	10792080	10798155
CUST_3376_PI419771968	AK131781	uc007xij	0.000726	232.994	up	UCSC_knowngene	chr15	-	91956509	91959385
CUST_8713_PI419771968		AK018872	0.00800412	232.878	up	NRED	chr1	-	170605402	170606013
CUST_7862_PI419771968		AK015266	0.000455	232.125	up	NRED	chr10	-	44450574	44458706
CUST_3163_PI419771968	AK015818	uc007uvj	0.0117996	232.07	up	UCSC_knowngene	chr14	+	100643822	100645499
CUST_8785_PI419771968		AK019587	0.0034905	231.308	up	NRED	chr11	-	114047287	114048063
CUST_398_PI419771968		AK016024	0.00160967	231.061	up	Fantom_stringent	chr5	-	105842306	105844689
CUST_8270_PI419771968		AK016793	0.0231588	230.886	up	NRED	chr6	-	87943129	87944173
CUST_1969_PI419771968	AK006037	uc007eyj	9.25e-05	230.438	up	UCSC_knowngene	chr10	+	41738021	41738616
CUST_7207_PI419771968		AK007284	0.00414048	229.105	up	NRED	chrX	-	94129432	94130000
CUST_135_PI419771968		AK006845	0.000966	228.677	up	Fantom_stringent	chr2	+	172688060	172688623
CUST_7806_PI419771968		AK015119	0.000695	227.983	up	NRED	chr6	+	30846898	30893470
CUST_4477_PI419771968	AK006186	uc008nen	0.0158386	227.288	up	UCSC_knowngene	chr2	-	151573315	151577161
CUST_7024_PI419771968		AK006360	0.000285	226.256	up	NRED	chr10	-	82601894	82604783
CUST_108_PI419771968		AK006091	3.89e-05	225.524	up	Fantom_stringent	chr19	+	29122021	29123219
CUST_6459_PI419771968	AK005635	uc009pfq	0.000385	224.499	up	UCSC_knowngene	chr9	-	45126348	45130162
CUST_6936_PI419771968		AK005755	0.00185929	224.267	up	NRED	chr12	+	52106142	52163530
CUST_5657_PI419771968	AK016361	uc009dci	0.00200379	223.772	up	UCSC_knowngene	chr6	+	102216093	102286668
CUST_8717_PI419771968		AK018915	0.00213743	223.645	up	NRED	chr2	+	154608067	154608415
CUST_5498_PI419771968	AK006894	uc009bis	0.02074	222.192	up	UCSC_knowngene	chr6	+	35280845	35286825
CUST_2988_PI419771968	AK015227	uc007srh	0.00240323	222.055	up	UCSC_knowngene	chr14	+	25441359	25448422
CUST_3874_PI419771968	AK076984	uc008ehr	0.000775	221.686	up	UCSC_knowngene	chr18	+	26166057	26229837
CUST_7880_PI419771968		AK015323	0.00035	217.984	up	NRED	chr13	-	117590901	117626985
CUST_2961_PI419771968	AK016686	uc007see	0.0005	216.817	up	UCSC_knowngene	chr14	+	8244986	8255199
CUST_2217_PI419771968	AK016948	uc007iga	0.000317	216.664	up	UCSC_knowngene	chr11	+	25226111	25267137
CUST_3940_PI419771968	AK016016	uc008ezf	0.00540263	216.56	up	UCSC_knowngene	chr18	-	57675354	57693406
CUST_4411_PI419771968	AK015969	uc008lwz	0.000228	216.533	up	UCSC_knowngene	chr2	+	120676422	120692425
CUST_7890_PI419771968		AK015366	0.00126454	215.281	up	NRED	chr17	+	27462298	27463953
CUST_4436_PI419771968	AK015562	uc008mje	0.000713	213.444	up	UCSC_knowngene	chr2	-	130369526	130389485
CUST_3878_PI419771968	AK019704	uc008ehv	0.00574209	211.848	up	UCSC_knowngene	chr18	+	29601853	29625761
CUST_7861_PI419771968		AK015262	0.00147891	207.807	up	NRED	chr1	+	167415323	167419679
CUST_7021_PI419771968		AK006325	0.00309204	207.556	up	NRED	chr2	-	164904192	164916250
CUST_1663_PI419771968	AK038423	uc007azi	0.00204167	207.048	up	UCSC_knowngene	chr1	-	53754873	53763628
CUST_7961_PI419771968		AK015596	0.00100555	206.974	up	NRED	chr5	+	66342543	66343444
CUST_8259_PI419771968		AK016745	0.00170097	205.815	up	NRED	chr8	-	116865060	116875378
CUST_8853_PI419771968		AK019828	0.00120474	205.716	up	NRED	chr10	+	116039847	116040350
CUST_7085_PI419771968		AK006729	0.000355	205.713	up	NRED	chr19	-	30432708	30435170
CUST_2749_PI419771968	AK016178	uc007puv	0.00245158	205.587	up	UCSC_knowngene	chr13	-	23847690	23849489
CUST_4412_PI419771968	AK006022	uc008lxa	2.31e-05	205.403	up	UCSC_knowngene	chr2	+	120676440	120692425
CUST_388_PI419771968		AK015510	0.012547	204.726	up	Fantom_stringent	chr12	-	108961951	108973698
CUST_1807_PI419771968	AK029630	uc007dak	0.000412	204.324	up	UCSC_knowngene	chr1	-	155626516	155655294
CUST_8860_PI419771968		AK019859	0.00026	203.829	up	NRED	chr8	+	12502898	12505340
CUST_3834_PI419771968	AK007204	uc008dvj	0.00777282	203.359	up	UCSC_knowngene	chr17	-	88695409	88704676
CUST_8206_PI419771968		AK016439	0.0048423	202.735	up	NRED	chr5	+	150654873	150656980
CUST_8181_PI419771968		AK016333	0.000681	202.418	up	NRED	chr10	+	116166308	116176816
CUST_11703_PI419771968		AK077189	0.00162575	201.706	up	NRED	chr5	+	150244435	150246156
CUST_7757_PI419771968		AK014901	0.00195362	199.305	up	NRED	chr10	+	87598663	87600276
CUST_3010_PI419771968	BC049685	uc007tbw	0.0124788	198.709	up	UCSC_knowngene	chr14	-	37915325	37927208
CUST_137_PI419771968		AK006914	0.00337294	197.251	up	Fantom_stringent	chr1	+	90912687	90918785
CUST_8848_PI419771968		AK019800	0.000772	197.226	up	NRED	chr1	+	195029232	195052402
CUST_4815_PI419771968	AK006921	uc008rpz	3.46e-05	196.913	up	UCSC_knowngene	chr3	+	144412445	144413051
CUST_4394_PI419771968	AK019710	uc008lqo	0.00374205	195.371	up	UCSC_knowngene	chr2	-	115155010	115170016
CUST_7109_PI419771968		AK006843	0.000487	194.916	up	NRED	chr4	-	53575854	53577569
CUST_5635_PI419771968	AK155560	uc009cwf	0.00655681	194.734	up	UCSC_knowngene	chr6	-	89219504	89235719
CUST_8778_PI419771968		AK019572	0.00174645	194.613	up	NRED	chr6	-	143180864	143181876
CUST_4622_PI419771968	AK029633	uc008paf	8.98e-05	193.78	up	UCSC_knowngene	chr3	-	36951138	36958946
CUST_13576_PI419771968	1700073E17Rik	NR_003625	0.00260009	193.618	up	RefSeq_NR	chr6	+	145336144	145340743
CUST_7049_PI419771968		AK006590	0.00120959	193.387	up	NRED	chr18	+	75940685	75941955
CUST_1223_PI419771968		AK131705	0.000349	193.266	up	Fantom_stringent	chr11	-	95685270	95685725
CUST_6043_PI419771968	AK005578	uc009jnt	0.00762413	192.252	up	UCSC_knowngene	chr7	-	128730902	128733350
CUST_8218_PI419771968		AK016503	0.00444352	192.136	up	NRED	chr14	+	45478345	45578097
CUST_13224_PI419771968		BC048591	0.000867	190.801	up	NRED	chr1	+	184230964	184233376
CUST_8792_PI419771968		AK019616	0.000918	190.475	up	NRED	chr5	-	101461569	101462271
CUST_4762_PI419771968	AK132829	uc008rbl	0.0020733	189.734	up	UCSC_knowngene	chr3	-	113921560	113926602
CUST_8217_PI419771968		AK016494	0.0125914	187.405	up	NRED	chr7	-	135345591	135346823
CUST_5693_PI419771968	AK019772	uc009dta	0.00418829	186.814	up	UCSC_knowngene	chr6	-	124960198	124999871
CUST_1851_PI419771968	AK017125	uc007dqr	0.000427	185.097	up	UCSC_knowngene	chr1	-	174471750	174480937
CUST_4070_PI419771968	AK016120	uc008gys	0.0275412	185.015	up	UCSC_knowngene	chr19	+	21179199	21180026
CUST_12642_PI419771968		AK131727	0.0012685	184.517	up	NRED	chr1	-	23262523	23263246
CUST_2324_PI419771968	AK006051	uc007kde	0.00855558	184.476	up	UCSC_knowngene	chr11	+	74986061	74991135
CUST_3233_PI419771968	AK029646	uc007vkw	0.0343516	183.964	up	UCSC_knowngene	chr15	-	32687170	32702907
CUST_13222_PI419771968		BC048567	0.000253	182.899	up	NRED	chr6	-	38383037	38383759
CUST_2234_PI419771968	AK076655	uc007ikz	0.00111846	182.832	up	UCSC_knowngene	chr11	+	34199749	34208113
CUST_7805_PI419771968		AK015114	0.00276913	181.855	up	NRED	chr12	+	106103539	106109734
CUST_99_PI419771968		AK005751	0.000454	181.795	up	Fantom_stringent	chr9	+	99223244	99223935
CUST_562_PI419771968		AK029760	0.00921284	181.399	up	Fantom_stringent	chr2	+	127517634	127526224
CUST_1891_PI419771968	AK006595	uc007eda	0.0010372	181.185	up	UCSC_knowngene	chr1	-	193714109	193725600
CUST_6973_PI419771968		AK006012	0.000135	180.101	up	NRED	chr7	-	125883962	125884695
CUST_7092_PI419771968		AK006764	0.00782006	179.966	up	NRED	chr8	+	87956584	87957214
CUST_3505_PI419771968	AK131804	uc007zfx	0.000766	179.607	up	UCSC_knowngene	chr16	-	42796500	42875875
CUST_7838_PI419771968		AK015201	0.0178176	179.432	up	NRED	chr14	+	48518583	48519564
CUST_3329_PI419771968	AK015615	uc007wwf	0.000426	179.39	up	UCSC_knowngene	chr15	+	81021206	81023185
CUST_6021_PI419771968	BC042407	uc009jhc	0.00230716	178.491	up	UCSC_knowngene	chr7	+	120152627	120154405
CUST_6976_PI419771968		AK006032	0.00593355	177.896	up	NRED	chr19	-	45437705	45438139
CUST_9290_PI419771968		AK021347	5.29e-05	177.25	up	NRED	chr9	+	78669682	78670176
CUST_415_PI419771968		AK016950	0.0124111	176.963	up	Fantom_stringent	chr12	-	107933925	107954534
CUST_7889_PI419771968		AK015361	0.00482682	176.842	up	NRED	chr12	+	75943761	75950648
CUST_1890_PI419771968	AK076925	uc007ecz	0.000485	175.19	up	UCSC_knowngene	chr1	-	193714109	193723008
CUST_4222_PI419771968	AK076911	uc008itk	0.00255295	175.174	up	UCSC_knowngene	chr2	+	25640136	25642542
CUST_4267_PI419771968	AK076935	uc008jor	0.00970779	174.718	up	UCSC_knowngene	chr2	+	42984259	42987149
CUST_5638_PI419771968	BC100523	uc009cxn	0.017785	173.689	up	UCSC_knowngene	chr6	-	90546678	90549919
CUST_4885_PI419771968	AK006581	uc008sme	0.000214	172.896	up	UCSC_knowngene	chr4	-	42237747	42269475
CUST_8068_PI419771968		AK015964	0.0296469	171.221	up	NRED	chr2	+	22882034	22882914
CUST_5170_PI419771968	AK005363	uc008wsp	0.00444355	170.282	up	UCSC_knowngene	chr5	+	24491659	24503980
CUST_4471_PI419771968	AK015363	uc008mzn	0.00366392	170.191	up	UCSC_knowngene	chr2	+	151127774	151141983
CUST_8200_PI419771968		AK016410	0.00275668	168.762	up	NRED	chr1	-	97597760	97613095
CUST_2661_PI419771968	AK006884	uc007osa	0.00233248	168.13	up	UCSC_knowngene	chr12	-	100864281	100866184
CUST_4606_PI419771968	AK015118	uc008osz	0.00820758	167.642	up	UCSC_knowngene	chr3	+	23359971	23420249
CUST_2938_PI419771968	AK015520	uc007rxq	0.00218127	167.428	up	UCSC_knowngene	chr13	-	115376720	115397292
CUST_136_PI419771968		AK006846	0.000286	167.307	up	Fantom_stringent	chr12	-	55163035	55180379
CUST_7154_PI419771968		AK007033	0.00273479	167.24	up	NRED	chr14	-	42668556	42674084
CUST_6419_PI419771968	AK015174	uc009orc	0.00318546	167.189	up	UCSC_knowngene	chr9	-	30836564	30837420
CUST_7127_PI419771968		AK006908	0.00143554	165.041	up	NRED	chr5	-	88337612	88408376
CUST_5217_PI419771968	AK015324	uc008xiw	0.00343941	165.022	up	UCSC_knowngene	chr5	-	45501867	45566932
CUST_8809_PI419771968		AK019673	0.000371	164.738	up	NRED	chr6	-	94082916	94187436
CUST_8832_PI419771968		AK019750	0.000368	164.522	up	NRED	chr5	-	127681064	127694701
CUST_8248_PI419771968		AK016703	0.0022045	163.715	up	NRED	chr6	-	147478322	147479825
CUST_11903_PI419771968		AK080546	0.00804938	163.681	up	NRED	chr6	+	125444445	125445987
CUST_8349_PI419771968		AK017091	0.00125407	163.522	up	NRED	chr10	-	77932559	77934001
CUST_3636_PI419771968	AK019626	uc008ajz	0.0152579	163.085	up	UCSC_knowngene	chr17	-	9943616	9968732
CUST_6476_PI419771968	AK086943	uc009plm	0.00105322	161.361	up	UCSC_knowngene	chr9	-	51721581	51739766
CUST_2822_PI419771968	AK019623	uc007qsa	0.00511018	161.098	up	UCSC_knowngene	chr13	-	55877307	55885840
CUST_7035_PI419771968		AK006436	0.000439	160.315	up	NRED	chr14	+	118678513	118678759
CUST_7023_PI419771968		AK006354	0.0159346	159.98	up	NRED	chr17	-	54491907	54509399
CUST_7012_PI419771968		AK006278	3.99e-05	159.256	up	NRED	chr13	-	81023484	81024785
CUST_11691_PI419771968		AK076933	0.000331	159.081	up	NRED	chr3	+	98853744	98857665
CUST_7994_PI419771968		AK015691	0.00176034	158.279	up	NRED	chr1	-	196038380	196048953
CUST_7885_PI419771968		AK015344	0.0148922	157.984	up	NRED	chr10	+	75323087	75324443
CUST_1986_PI419771968	AK046160	uc007fed	0.0132376	157.685	up	UCSC_knowngene	chr10	-	59356631	59360464
CUST_7113_PI419771968		AK006851	0.0162292	157.223	up	NRED	chr13	+	41896151	41897164
CUST_7020_PI419771968		AK006317	0.00120232	157.01	up	NRED	chr5	-	67998456	67999065
CUST_3550_PI419771968	AK133038	uc007zrd	0.0049747	156.841	up	UCSC_knowngene	chr16	+	73072619	73095928
CUST_7760_PI419771968		AK014914	0.00229147	156.398	up	NRED	chr18	+	22329990	22331726
CUST_6990_PI419771968		AK006126	0.0060742	155.793	up	NRED	chr9	+	13894520	13913941
CUST_9430_PI419771968		AK030176	0.000624	154.296	up	NRED	chr1	-	170278664	170280939
CUST_8332_PI419771968		AK017042	0.00548986	151.77	up	NRED	chr10	+	70331391	70333479
CUST_8354_PI419771968		AK017121	0.0019426	151.409	up	NRED	chr2	-	18720881	18722919
CUST_6399_PI419771968	AK006623	uc009ogl	0.00215945	151.175	up	UCSC_knowngene	chr9	+	16403823	16404246
CUST_7837_PI419771968		AK015194	0.000495	151.081	up	NRED	chr14	+	121036256	121037440
CUST_7833_PI419771968		AK015186	0.000501	150.852	up	NRED	chr12	-	84060833	84062144
CUST_7928_PI419771968		AK015485	0.00511339	150.709	up	NRED	chr12	+	78784047	78790478
CUST_2666_PI419771968	AK079713	uc007oth	0.0022111	150.183	up	UCSC_knowngene	chr12	+	102245196	102253024
CUST_4128_PI419771968	AK132743	uc008hof	0.00693546	149.699	up	UCSC_knowngene	chr19	+	43341425	43352144
CUST_4876_PI419771968	AK016961	uc008shn	7.31e-05	149.279	up	UCSC_knowngene	chr4	-	40429872	40472581
CUST_6061_PI419771968	AK007137	uc009jyh	0.0364403	148.908	up	UCSC_knowngene	chr7	-	135335563	135346842
CUST_2272_PI419771968	AK005722	uc007jeq	2.71e-05	148.643	up	UCSC_knowngene	chr11	-	59539418	59553656
CUST_12645_PI419771968		AK131796	0.000608	148.189	up	NRED	chr19	+	56896451	56897029
CUST_5013_PI419771968	AK018866	uc008uqr	0.000178	147.713	up	UCSC_knowngene	chr4	-	124127481	124128531
CUST_6930_PI419771968		AK005733	0.00408465	147.077	up	NRED	chr17	-	87729103	87731392
CUST_389_PI419771968		AK015532	0.00125053	147.001	up	Fantom_stringent	chr19	+	60019642	60020561
CUST_140_PI419771968		AK007010	0.000147	146.933	up	Fantom_stringent	chr15	+	38448540	38449819
CUST_7860_PI419771968		AK015258	0.000302	146.009	up	NRED	chr6	-	128655853	128657819
CUST_5702_PI419771968	AK037571	uc009duh	7.07e-05	145.404	up	UCSC_knowngene	chr6	+	125215542	125223795
CUST_8225_PI419771968		AK016564	2.38e-05	145.383	up	NRED	chr12	+	109357056	109359494
CUST_7644_PI419771968		AK014052	0.00266958	145.255	up	NRED	chr13	-	112001676	112019639
CUST_5844_PI419771968	AK016650	uc009glf	0.000527	144.048	up	UCSC_knowngene	chr7	+	47518074	47525123
CUST_5080_PI419771968	AK019745	uc008vsx	0.00798854	143.557	up	UCSC_knowngene	chr4	-	146771276	146773788
CUST_2939_PI419771968	AK016040	uc007rxr	0.000181	143.263	up	UCSC_knowngene	chr13	+	115397435	115488030
CUST_7959_PI419771968		AK015588	0.000689	143.114	up	NRED	chr5	-	31753591	31754704
CUST_5359_PI419771968	AK006923	uc008yyk	0.00111711	142.695	up	UCSC_knowngene	chr5	-	114153708	114174781
CUST_7146_PI419771968		AK006995	0.0147317	141.177	up	NRED	chr19	+	44014526	44015410
CUST_1277_PI419771968		AK135931	0.000242	141.112	up	Fantom_stringent	chr1	+	80183524	80188603
CUST_7794_PI419771968		AK015091	0.00273957	140.837	up	NRED	chr14	-	23350270	23362045
CUST_5196_PI419771968	AK040173	uc008xau	0.00145274	139.949	up	UCSC_knowngene	chr5	+	33972573	33974741
CUST_6751_PI419771968	AK048032	uc009tvj	0.00254607	139.921	up	UCSC_knowngene	chrX	-	96604909	96614234
CUST_7063_PI419771968		AK006649	0.0102092	139.682	up	NRED	chr8	-	126042248	126042695
CUST_5637_PI419771968	Ccdc37(AK021139)	uc009cxi	0.000789	139.579	up	UCSC_knowngene	chr6	-	90370939	90378781
CUST_3036_PI419771968	Rpgrip1(AK039097)	uc007toq	0.000991	139.359	up	UCSC_knowngene	chr14	+	52779049	52783221
CUST_2213_PI419771968	AK132720	uc007ifd	0.00198439	138.807	up	UCSC_knowngene	chr11	+	23397756	23399192
CUST_6962_PI419771968		AK005961	0.00222145	138.743	up	NRED	chr9	-	62115182	62115650
CUST_1660_PI419771968	AK052226	uc007ayw	0.00415868	138.548	up	UCSC_knowngene	chr1	+	53252956	53254535
CUST_7846_PI419771968		AK015226	0.00347069	138.267	up	NRED	chr16	-	36894479	36895769
CUST_7851_PI419771968		AK015235	0.000364	137.717	up	NRED	chr17	-	79874963	79877225
CUST_6954_PI419771968		AK005901	0.00142753	137.401	up	NRED	chr1	+	122332381	122335034
CUST_1122_PI419771968		AK086441	0.000256	136.554	up	Fantom_stringent	chr15	+	89204347	89206149
CUST_9187_PI419771968		AK020986	0.000603	135.11	up	NRED	chr5	-	105827924	105829175
CUST_7079_PI419771968		AK006716	0.025874	134.54	up	NRED	chr5	+	109192860	109197933
CUST_6334_PI419771968	AK019781	uc009nol	0.0037572	134.007	up	UCSC_knowngene	chr8	-	119305611	119325312
CUST_6379_PI419771968	AK015306	uc009oao	0.00195644	133.933	up	UCSC_knowngene	chr9	-	3133846	3199799
CUST_8045_PI419771968		AK015853	0.00382451	133.876	up	NRED	chr14	-	99702370	99703560
CUST_3939_PI419771968	AK006909	uc008eze	0.000181	133.335	up	UCSC_knowngene	chr18	-	57665628	57693382
CUST_4850_PI419771968	AK007260	uc008ryu	0.00212819	132.102	up	UCSC_knowngene	chr4	-	10435177	10724949
CUST_7119_PI419771968		AK006868	0.00756582	131.426	up	NRED	chr14	+	8255458	8256169
CUST_7803_PI419771968		AK015112	0.00273837	131.381	up	NRED	chr3	-	108881507	108883332
CUST_4756_PI419771968	AK005839	uc008qyp	0.0119143	131.261	up	UCSC_knowngene	chr3	-	108051828	108059903
CUST_3654_PI419771968	4930474M22Rik	uc008amz	0.000161	130.464	up	UCSC_knowngene	chr17	-	14526119	14535949
CUST_3885_PI419771968	Nme5(AK138562)	uc008ekr	0.000996	130.207	up	UCSC_knowngene	chr18	-	34717296	34738421
CUST_8052_PI419771968		AK015876	0.00559026	129.748	up	NRED	chr6	+	102216093	102256798
CUST_8275_PI419771968		AK016822	0.00110408	129.688	up	NRED	chr5	+	113069354	113070655
CUST_4074_PI419771968	AK077070	uc008gzi	0.00231216	129.425	up	UCSC_knowngene	chr19	+	22067071	22095513
CUST_9433_PI419771968		AK030245	0.000264	129.323	up	NRED	chr17	+	21228171	21240311
CUST_7051_PI419771968		AK006604	0.00546312	128.418	up	NRED	chr8	+	112968388	112971418
CUST_5625_PI419771968	AK131825	uc009ctt	0.000908	126.791	up	UCSC_knowngene	chr6	-	87625586	87640841
CUST_2339_PI419771968	AK161406	uc007kit	0.000151	126.27	up	UCSC_knowngene	chr11	-	78106346	78115009
CUST_8858_PI419771968		AK019843	0.0136965	126.19	up	NRED	chr6	-	98485240	98502104
CUST_6821_PI419771968	DQ874391	uc009vfl	0.00420767	126.184	up	UCSC_knowngene	chrY_random	+	2282289	2284650
CUST_6477_PI419771968	AK076937	uc009pln	0.00170187	126.025	up	UCSC_knowngene	chr9	+	51722533	51735108
CUST_391_PI419771968		AK015577	0.0150881	125.569	up	Fantom_stringent	chr12	-	100399486	100400919
CUST_8854_PI419771968		AK019831	0.0114986	125.201	up	NRED	chr15	-	80058380	80058844
CUST_3124_PI419771968	AK015336	uc007ukz	0.000301	124.922	up	UCSC_knowngene	chr14	-	67950878	68016579
CUST_7110_PI419771968		AK006847	0.00342356	124.308	up	NRED	chr19	-	5488743	5489198
CUST_7147_PI419771968		AK006998	0.00094	124.024	up	NRED	chr16	-	90694611	90694996
CUST_11688_PI419771968		AK076870	0.00192235	123.904	up	NRED	chr18	+	32294469	32295059
CUST_6570_PI419771968	1700057G04Rik	uc009rap	0.0263943	123.879	up	UCSC_knowngene	chr9	+	92204214	92221980
CUST_7791_PI419771968		AK015085	0.0089127	123.823	up	NRED	chr14	+	120198199	120216796
CUST_7897_PI419771968		AK015405	0.00497218	123.329	up	NRED	chr6	-	48346177	48346723
CUST_7914_PI419771968		AK015449	0.000733	123.152	up	NRED	chr10	-	56156161	56157409
CUST_7814_PI419771968		AK015131	0.00188563	121.583	up	NRED	chr15	+	98228875	98243232
CUST_7904_PI419771968		AK015419	0.01444	121.562	up	NRED	chr1	-	41224404	41238097
CUST_8103_PI419771968		AK016095	0.0012653	121.276	up	NRED	chr4	-	94755773	94758110
CUST_2149_PI419771968	AK014882	uc007hfg	0.00197574	120.949	up	UCSC_knowngene	chr10	+	120202787	120215942
CUST_5876_PI419771968	AK006355	uc009gyl	0.00846445	120.323	up	UCSC_knowngene	chr7	-	53601140	53604424
CUST_7829_PI419771968		AK015173	0.00170209	120.245	up	NRED	chr5	+	38966091	38967007
CUST_7037_PI419771968		AK006476	0.00369453	119.842	up	NRED	chr14	+	104298710	104299169
CUST_3876_PI419771968	AK076809	uc008eht	0.00246084	118.894	up	UCSC_knowngene	chr18	+	29030716	29096517
CUST_5264_PI419771968	AK016430	uc008xve	0.000705	118.688	up	UCSC_knowngene	chr5	+	77239012	77271614
CUST_9389_PI419771968		AK029496	0.000493	118.382	up	NRED	chr16	+	91013965	91016988
CUST_6204_PI419771968	AK015741	uc009lwi	0.00437168	118.082	up	UCSC_knowngene	chr8	+	70892357	70899609
CUST_7062_PI419771968		AK006648	0.000265	117.783	up	NRED	chr14	+	55251167	55251618
CUST_7774_PI419771968		AK015026	0.000252	117.029	up	NRED	chr10	+	91863758	91880240
CUST_4832_PI419771968	AK016265	uc008ruy	0.000101	116.655	up	UCSC_knowngene	chr3	-	156209716	156224710
CUST_5573_PI419771968	AK076685	uc009cbi	0.00215219	116.23	up	UCSC_knowngene	chr6	+	56319698	56321936
CUST_8334_PI419771968		AK017046	0.0114204	115.303	up	NRED	chr15	+	83885637	83887021
CUST_8843_PI419771968		AK019768	0.00276678	115.226	up	NRED	chr3	+	37737389	37738495
CUST_413_PI419771968		AK016760	0.00210209	115.213	up	Fantom_stringent	chr7	-	144315486	144317390
CUST_8107_PI419771968		AK016105	0.00557591	115.15	up	NRED	chr5	-	129241234	129241904
CUST_3976_PI419771968	AK007214	uc008fpq	0.010247	114.858	up	UCSC_knowngene	chr18	-	74655331	74690778
CUST_6949_PI419771968		AK005857	0.00741438	114.809	up	NRED	chr7	+	79106060	79172203
CUST_8333_PI419771968		AK017043	0.00186861	114.746	up	NRED	chr17	+	84477999	84489215
CUST_6546_PI419771968	AK146160	uc009qui	0.00291087	113.718	up	UCSC_knowngene	chr9	+	78276251	78278612
CUST_3435_PI419771968	DQ072380	uc007yeg	0.00525404	113.433	up	UCSC_knowngene	chr16	+	10791151	10798155
CUST_1707_PI419771968	AK080399	uc007bol	0.0226463	112.694	up	UCSC_knowngene	chr1	-	75216669	75220229
CUST_7066_PI419771968		AK006663	0.00726005	112.616	up	NRED	chr2	+	170181860	170205935
CUST_3182_PI419771968	AK015607	uc007uyg	0.0157468	112.524	up	UCSC_knowngene	chr14	-	115339448	115345170
CUST_6964_PI419771968		AK005966	0.00180264	112.015	up	NRED	chr12	+	108075077	108117051
CUST_405_PI419771968		AK016423	0.00787636	111.919	up	Fantom_stringent	chr2	-	120281433	120295103
CUST_386_PI419771968		AK015343	0.00864709	111.84	up	Fantom_stringent	chr3	+	125383914	125393856
CUST_5949_PI419771968	AK076849	uc009idi	0.000191	111.724	up	UCSC_knowngene	chr7	-	90001002	90015584
CUST_2825_PI419771968	AK015814	uc007qtp	0.000107	111.006	up	UCSC_knowngene	chr13	+	58382543	58397948
CUST_5304_PI419771968	AK133807	uc008yig	0.00344331	110.741	up	UCSC_knowngene	chr5	-	101269772	101276186
CUST_1239_PI419771968		AK133346	0.00172586	110.388	up	Fantom_stringent	chr6	-	116210451	116214113
CUST_13469_PI419771968	Speer9-ps1	NR_001583	0.00011	109.923	up	RefSeq_NR	chr7	+	3128145	3144993
CUST_7842_PI419771968		AK015216	0.0160754	109.861	up	NRED	chr11	+	50757382	50758032
CUST_7211_PI419771968		AK007306	0.0116184	109.726	up	NRED	chr3	+	95045194	95045510
CUST_11681_PI419771968		AK076703	0.00249713	109.711	up	NRED	chr6	+	38670880	38730261
CUST_8150_PI419771968		AK016220	0.000619	109.641	up	NRED	chr10	-	119183118	119198755
CUST_4670_PI419771968	AK006465	uc008ppk	0.00329015	109.545	up	UCSC_knowngene	chr3	-	83359288	83378041
CUST_8201_PI419771968		AK016418	0.00595575	109.51	up	NRED	chr3	-	136421921	136422924
CUST_8214_PI419771968		AK016486	0.00038	109.233	up	NRED	chr1	+	193916252	193923511
CUST_6431_PI419771968	AK018988	uc009otz	0.00063	109.197	up	UCSC_knowngene	chr9	+	36575471	36590260
CUST_7992_PI419771968		AK015674	0.00113947	108.658	up	NRED	chr9	-	68318708	68368007
CUST_4339_PI419771968	AK015373	uc008kjz	0.00985049	108.287	up	UCSC_knowngene	chr2	-	84913770	84926618
CUST_3546_PI419771968	AK139678	uc007zqv	0.00954255	107.293	up	UCSC_knowngene	chr16	+	70616669	70625067
CUST_8823_PI419771968		AK019718	0.0010497	107.257	up	NRED	chr16	+	90935211	90935873
CUST_7089_PI419771968		AK006740	0.00201522	106.884	up	NRED	chr9	+	7965837	7977004
CUST_7848_PI419771968		AK015230	6.83e-05	106.881	up	NRED	chr13	+	48586430	48587428
CUST_3288_PI419771968	AK006196	uc007wfq	0.00739053	106.878	up	UCSC_knowngene	chr15	+	74539780	74540778
CUST_6982_PI419771968		AK006067	0.0247376	106.51	up	NRED	chr9	+	89697707	89700893
CUST_915_PI419771968		AK077006	0.0130061	106.293	up	Fantom_stringent	chr8	-	46102569	46107739
CUST_4472_PI419771968	AK006486	uc008nbr	0.00289379	106.003	up	UCSC_knowngene	chr2	-	151206385	151258138
CUST_3785_PI419771968	AK160416	uc008dfm	0.00121054	105.704	up	UCSC_knowngene	chr17	-	63654794	63662322
CUST_2473_PI419771968	AK006331	uc007mfh	0.00026	105.681	up	UCSC_knowngene	chr11	+	113952751	113956621
CUST_8776_PI419771968		AK019567	0.00222432	104.68	up	NRED	chr5	-	46318060	46323648
CUST_2998_PI419771968	AK018913	uc007svs	0.00628101	104.416	up	UCSC_knowngene	chr14	-	31583866	31591190
CUST_7114_PI419771968		AK006853	0.00128819	104.342	up	NRED	chr18	-	70102973	70129263
CUST_8141_PI419771968		AK016182	0.00262569	104.024	up	NRED	chr12	-	94654901	94683263
CUST_7133_PI419771968		AK006936	0.00830953	103.403	up	NRED	chr13	+	57383723	57384562
CUST_7764_PI419771968		AK014935	0.0019033	103.302	up	NRED	chr8	-	116157833	116159680
CUST_7022_PI419771968		AK006345	0.00915014	103.155	up	NRED	chr10	+	40069535	40070132
CUST_2593_PI419771968	AK081945	uc007nrj	0.00107169	103.119	up	UCSC_knowngene	chr12	-	66288858	66314486
CUST_3569_PI419771968	AK082307	uc007zts	0.00322509	103.024	up	UCSC_knowngene	chr16	+	84972455	84979696
CUST_1990_PI419771968	AK029795	uc007ffi	0.0130304	102.699	up	UCSC_knowngene	chr10	+	60494050	60500828
CUST_13651_PI419771968	4930448K20Rik	NR_004448	0.00231401	102.51	up	RefSeq_NR	chr4	-	9843111	9844544
CUST_12430_PI419771968		AK086661	0.000578	102.209	up	NRED	chr15	+	89204056	89205863
CUST_6927_PI419771968		AK005685	0.012252	102.208	up	NRED	chr1	-	139222010	139222419
CUST_8356_PI419771968		AK017129	3.86e-05	101.884	up	NRED	chr6	-	75522087	75523452
CUST_8982_PI419771968		AK020357	0.00458358	101.844	up	NRED	chr2	-	151930418	151930945
CUST_472_PI419771968		AK018898	0.00176874	101.545	up	Fantom_stringent	chr1	+	132060422	132061974
CUST_6932_PI419771968		AK005737	0.000139	101.313	up	NRED	chr16	+	30510774	30511456
CUST_12649_PI419771968		AK131883	0.00215139	101.097	up	NRED	chr3	-	92408639	92411414
CUST_6908_PI419771968		AK005466	0.00120402	99.5423	up	NRED	chr11	+	109205599	109205947
CUST_2808_PI419771968	AK014969	uc007qms	0.0101176	99.3619	up	UCSC_knowngene	chr13	+	52192109	52219527
CUST_2759_PI419771968	AK132076	uc007pwy	0.00191062	99.1411	up	UCSC_knowngene	chr13	-	26012940	26058185
CUST_3875_PI419771968	AK076658	uc008ehs	0.00479773	99.0584	up	UCSC_knowngene	chr18	+	29030716	29055386
CUST_3969_PI419771968	AK016077	uc008fmz	0.000615	98.7966	up	UCSC_knowngene	chr18	-	67935686	67959597
CUST_3161_PI419771968	AK019593	uc007uuk	0.00910413	98.4551	up	UCSC_knowngene	chr14	-	93260474	93265785
CUST_3442_PI419771968	AK005649	uc007yfu	0.00198442	98.4044	up	UCSC_knowngene	chr16	+	12811482	12848746
CUST_5215_PI419771968	AK076918	uc008xir	0.00653236	98.3843	up	UCSC_knowngene	chr5	-	44804031	44818829
CUST_7201_PI419771968		AK007236	0.0279885	98.3575	up	NRED	chr1	-	59591654	59594073
CUST_7866_PI419771968		AK015281	0.00117331	98.2958	up	NRED	chr14	+	77159937	77162022
CUST_1871_PI419771968	AK047804	uc007dxy	0.00352627	98.0905	up	UCSC_knowngene	chr1	+	184218245	184233378
CUST_8284_PI419771968		AK016843	0.00370288	98.0422	up	NRED	chr1	-	72005571	72051769
CUST_2969_PI419771968	AK019801	uc007shy	0.00554625	98.0399	up	UCSC_knowngene	chr14	+	20324159	20335262
CUST_6894_PI419771968		AK005124	0.00249788	97.7954	up	NRED	chr2	-	70327999	70401414
CUST_6430_PI419771968	AK006426	uc009ots	0.0195852	97.277	up	UCSC_knowngene	chr9	-	36476440	36500774
CUST_6980_PI419771968		AK006053	0.0013992	97.1251	up	NRED	chr1	-	73069058	73069453
CUST_2862_PI419771968	AK005629	uc007rct	0.000121	96.997	up	UCSC_knowngene	chr13	-	70157774	70167201
CUST_6826_PI419771968	AK077064	uc009vhq	6.91e-05	96.5865	up	UCSC_knowngene	chrY_random	+	42617928	42624320
CUST_12931_PI419771968		AK160417	0.000585	96.3507	up	NRED	chr6	+	143970465	143972174
CUST_7960_PI419771968		AK015589	0.0129911	96.3476	up	NRED	chr15	-	99935664	99938592
CUST_5386_PI419771968	AK006664	uc008zlk	0.00966603	95.5766	up	UCSC_knowngene	chr5	+	122964028	122969608
CUST_7836_PI419771968		AK015192	0.0134178	95.4917	up	NRED	chr16	-	70381693	70382630
CUST_7943_PI419771968		AK015551	5.32e-06	95.3488	up	NRED	chr13	+	47762918	47763761
CUST_6261_PI419771968	AK007095	uc009mqu	0.00315451	95.3174	up	UCSC_knowngene	chr8	-	90159997	90166082
CUST_7156_PI419771968		AK007037	0.00965445	95.1647	up	NRED	chr8	+	80148070	80152853
CUST_6007_PI419771968	AK007082	uc009jdo	0.000586	94.1477	up	UCSC_knowngene	chr7	+	116582131	116588409
CUST_7075_PI419771968		AK006698	0.00888782	94.0121	up	NRED	chr4	-	150202333	150229058
CUST_3581_PI419771968	AK006191	uc007zwy	0.00505677	93.9749	up	UCSC_knowngene	chr16	+	91011493	91016988
CUST_4624_PI419771968	AK016393	uc008paw	0.00535989	93.3805	up	UCSC_knowngene	chr3	+	37512844	37513748
CUST_8724_PI419771968		AK018992	0.00201409	93.159	up	NRED	chr12	-	114113426	114114025
CUST_8718_PI419771968		AK018939	5.11e-05	93.032	up	NRED	chr19	+	7457026	7458040
CUST_7944_PI419771968		AK015554	0.000774	92.9196	up	NRED	chr6	-	91380453	91390848
CUST_8719_PI419771968		AK018958	2.07e-05	92.3094	up	NRED	chr10	+	70664492	70667235
CUST_6931_PI419771968		AK005735	0.0010381	91.3677	up	NRED	chr2	+	171059508	171064491
CUST_12158_PI419771968		AK083519	0.00133761	91.2288	up	NRED	chr1	+	16647632	16652359
CUST_8234_PI419771968		AK016607	0.0050577	91.0721	up	NRED	chr5	-	37264833	37268118
CUST_4544_PI419771968	AK006474	uc008oci	0.00063	90.898	up	UCSC_knowngene	chr2	-	171782378	171788299
CUST_131_PI419771968		AK006783	0.009939	90.5186	up	Fantom_stringent	chr6	+	112160701	112162507
CUST_10748_PI419771968		AK044736	0.00058	89.9362	up	NRED	chr14	+	35572587	35579200
CUST_3352_PI419771968	AK019680	uc007xcp	0.00582562	89.9034	up	UCSC_knowngene	chr15	+	84737097	84743684
CUST_8316_PI419771968		AK016981	0.00360821	89.5548	up	NRED	chr3	-	30691500	30692476
CUST_5786_PI419771968	AK132898	uc009fiw	0.00131445	88.533	up	UCSC_knowngene	chr7	-	17868928	17949156
CUST_4486_PI419771968	AK145231	uc008njn	0.000534	88.4068	up	UCSC_knowngene	chr2	-	154437546	154439173
CUST_8317_PI419771968		AK016983	0.000441	87.8886	up	NRED	chr19	-	45801044	45805050
CUST_4799_PI419771968	AK015999	uc008rlm	7.08e-06	87.7303	up	UCSC_knowngene	chr3	-	135099189	135100723
CUST_11237_PI419771968		AK050221	0.0227759	87.5747	up	NRED	chr19	+	32024573	32026851
CUST_1920_PI419771968	AK006045	uc007eln	0.00228354	87.5735	up	UCSC_knowngene	chr10	+	14425414	14478825
CUST_4464_PI419771968	AB080658	uc008msv	0.00524956	87.207	up	UCSC_knowngene	chr2	-	147187278	147188529
CUST_5467_PI419771968	AK019709	uc009axe	0.00528974	87.115	up	UCSC_knowngene	chr6	+	7512367	7515835
CUST_3251_PI419771968	AK006231	uc007vqn	0.00452393	87.0406	up	UCSC_knowngene	chr15	+	46156104	46205445
CUST_2004_PI419771968	AK019573	uc007fko	0.0244492	86.2278	up	UCSC_knowngene	chr10	+	65608043	65642262
CUST_7954_PI419771968		AK015575	0.0203329	85.7588	up	NRED	chr14	+	90526697	90669567
CUST_2543_PI419771968	AK015413	uc007nbp	0.0256179	85.1475	up	UCSC_knowngene	chr12	-	15003194	15057195
CUST_3210_PI419771968	AK133228	uc007vdl	0.00034	84.9955	up	UCSC_knowngene	chr15	-	6554340	6604303
CUST_3653_PI419771968	Tcte2(AK005879)	uc008amn	0.00690492	84.8145	up	UCSC_knowngene	chr17	-	13850972	13898401
CUST_97_PI419771968		AK005673	0.000168	84.5066	up	Fantom_stringent	chr14	-	32061871	32064439
CUST_1235_PI419771968		AK133065	0.00142793	83.9694	up	Fantom_stringent	chr9	+	72980495	72982728
CUST_7099_PI419771968		AK006813	0.00102095	83.273	up	NRED	chr2	-	122529275	122529843
CUST_6273_PI419771968	Gnao1(AK160434)	uc009mvj	0.00015	82.9288	up	UCSC_knowngene	chr8	+	96334737	96335667
CUST_6368_PI419771968	BC048579	uc009nyh	0.00228241	82.7783	up	UCSC_knowngene	chr8	+	128108537	128149505
CUST_2760_PI419771968	AK007041	uc007pwz	0.00287235	82.6102	up	UCSC_knowngene	chr13	-	26397672	26404275
CUST_3996_PI419771968	AK016386	uc008fue	0.0289701	82.249	up	UCSC_knowngene	chr18	-	83089331	83089940
CUST_4006_PI419771968	AK077035	uc008fvx	0.000988	82.1612	up	UCSC_knowngene	chr19	-	3065710	3197714
CUST_1819_PI419771968	AK016192	uc007ddy	0.00584149	82.1549	up	UCSC_knowngene	chr1	+	161065527	161096518
CUST_8192_PI419771968		AK016392	0.00474947	82.1384	up	NRED	chr18	-	81422945	81432805
CUST_8022_PI419771968		AK015801	0.00397975	81.5698	up	NRED	chr9	-	119349395	119353948
CUST_5243_PI419771968	AK007290	uc008xoq	0.00582675	81.4213	up	UCSC_knowngene	chr5	-	66557845	66582574
CUST_6922_PI419771968		AK005637	0.0145277	81.3666	up	NRED	chr7	-	123225293	123232697
CUST_8274_PI419771968		AK016816	0.000625	81.2867	up	NRED	chr6	+	143970427	143972298
CUST_7955_PI419771968		AK015579	0.00894602	81.0666	up	NRED	chr3	-	96205072	96205937
CUST_8825_PI419771968		AK019721	0.0016536	80.9898	up	NRED	chr9	-	107900446	107904735
CUST_8176_PI419771968		AK016323	0.00493002	80.7981	up	NRED	chr10	+	27109671	27117031
CUST_2356_PI419771968	AK018946	uc007kqq	0.000281	80.7233	up	UCSC_knowngene	chr11	-	84530477	84533934
CUST_5153_PI419771968	AK030448	uc008wpt	0.000301	80.229	up	UCSC_knowngene	chr5	+	22056254	22313668
CUST_1015_PI419771968		AK080629	0.00510502	80.2023	up	Fantom_stringent	chr8	+	124066021	124067381
CUST_12663_PI419771968		AK133004	0.0209827	80.1347	up	NRED	chr3	+	138189388	138189796
CUST_4826_PI419771968	AK005987	uc008rtx	0.000336	80.041	up	UCSC_knowngene	chr3	-	153130182	153138529
CUST_6619_PI419771968	AK007274	uc009rsq	6.35e-05	79.3151	up	UCSC_knowngene	chr9	-	109668565	109676417
CUST_2113_PI419771968	AK015051	uc007gyb	0.00250892	79.3074	up	UCSC_knowngene	chr10	+	101621538	101736178
CUST_3022_PI419771968	AK015279	uc007tgb	0.00242287	79.3034	up	UCSC_knowngene	chr14	-	45574891	45580982
CUST_8098_PI419771968		AK016082	0.0147754	79.2007	up	NRED	chr17	+	19609666	19626655
CUST_2582_PI419771968	AK131776	uc007nmk	0.00165335	79.1948	up	UCSC_knowngene	chr12	-	52086290	52105860
CUST_407_PI419771968		AK016458	0.00115918	79.1297	up	Fantom_stringent	chr8	+	12672426	12679229
CUST_2615_PI419771968	AK005679	uc007nwx	0.0167453	78.8571	up	UCSC_knowngene	chr12	+	75389721	75396932
CUST_12670_PI419771968		AK133257	0.0159015	78.7169	up	NRED	chr13	+	26861261	26864596
CUST_7125_PI419771968		AK006898	0.000399	77.8702	up	NRED	chr18	-	49962985	49977610
CUST_4913_PI419771968	AK133010	uc008syd	0.000928	77.8231	up	UCSC_knowngene	chr4	-	57372663	57377164
CUST_7993_PI419771968		AK015676	0.00554729	77.7493	up	NRED	chr3	+	33855121	33856069
CUST_2717_PI419771968	AK076914	uc007phy	0.0147845	77.7151	up	UCSC_knowngene	chr12	-	117980520	117995690
CUST_8331_PI419771968		AK017041	0.00402422	77.2027	up	NRED	chr13	-	67097756	67133341
CUST_148_PI419771968		AK007220	0.00134802	77.088	up	Fantom_stringent	chr8	-	97318070	97326336
CUST_6946_PI419771968		AK005835	0.0142831	76.9677	up	NRED	chr6	-	95064010	95067625
CUST_7852_PI419771968		AK015237	0.0200135	76.9466	up	NRED	chr9	+	79641447	79651042
CUST_4835_PI419771968	AK076987	uc008rvd	0.000544	76.4523	up	UCSC_knowngene	chr3	-	157190478	157197054
CUST_2276_PI419771968	AK005951	uc007jff	5.06e-05	76.3961	up	UCSC_knowngene	chr11	-	59760396	59761593
CUST_8402_PI419771968		AK017377	0.000461	76.1251	up	NRED	chr17	-	56969081	56970333
CUST_7172_PI419771968		AK007124	0.000945	76.1106	up	NRED	chr14	-	77042348	77042645
CUST_8351_PI419771968		AK017099	0.00180719	75.6471	up	NRED	chr5	-	122297675	122298853
CUST_5947_PI419771968	1700129I04Rik	uc009idd	2.22e-05	75.5278	up	UCSC_knowngene	chr7	-	89794677	89797038
CUST_1862_PI419771968	EG545391	uc007duw	0.00245059	75.4327	up	UCSC_knowngene	chr1	+	179921641	180102835
CUST_396_PI419771968		AK015943	0.00930752	75.1422	up	Fantom_stringent	chr1	-	187183339	187186744
CUST_3551_PI419771968	AK015664	uc007zre	0.00081	75.0055	up	UCSC_knowngene	chr16	+	73099151	73204257
CUST_3120_PI419771968	AK076947	uc007uiz	0.00156555	74.975	up	UCSC_knowngene	chr14	+	65792905	65804173
CUST_7018_PI419771968		AK006312	0.00205999	74.4424	up	NRED	chr12	-	111805689	111806291
CUST_6022_PI419771968	AK016028	uc009jhd	0.000475	74.331	up	UCSC_knowngene	chr7	-	120243681	120285529
CUST_6731_PI419771968	AK135688	uc009tig	0.00115096	73.9586	up	UCSC_knowngene	chrX	+	58264868	58329243
CUST_6993_PI419771968		AK006156	0.0036274	72.9921	up	NRED	chr11	-	79487369	79488630
CUST_3548_PI419771968	AK019789	uc007zqx	0.0203101	72.8547	up	UCSC_knowngene	chr16	+	71250148	71267421
CUST_7869_PI419771968		AK015287	0.00373256	72.8051	up	NRED	chr5	-	106793579	106795868
CUST_100_PI419771968		AK005763	0.000176	72.7773	up	Fantom_stringent	chr19	+	41338601	41339520
CUST_7102_PI419771968		AK006821	0.00139902	72.6834	up	NRED	chr2	+	3066074	3066503
CUST_8806_PI419771968		AK019659	0.0252102	72.5391	up	NRED	chr5	+	38735627	38740436
CUST_6151_PI419771968	AK007460	uc009lda	0.000205	72.515	up	UCSC_knowngene	chr8	+	23509192	23510063
CUST_8338_PI419771968		AK017062	0.00377536	72.5119	up	NRED	chr18	-	54654346	54656238
CUST_3877_PI419771968	AK132929	uc008ehu	0.0183669	72.4145	up	UCSC_knowngene	chr18	-	29556369	29656070
CUST_4572_PI419771968	AK019836	uc008oht	7.16e-05	72.3145	up	UCSC_knowngene	chr2	+	179149640	179151587
CUST_3827_PI419771968	AK011222	uc008dte	2.08e-06	72.1809	up	UCSC_knowngene	chr17	-	85354309	85356579
CUST_7157_PI419771968		AK007040	0.00784134	71.7688	up	NRED	chr10	+	83961618	83962371
CUST_10833_PI419771968		AK045655	0.00143335	71.7055	up	NRED	chr18	+	26372864	26374149
CUST_8179_PI419771968		AK016330	0.00161339	71.6026	up	NRED	chr8	-	48112158	48123531
CUST_7016_PI419771968		AK006305	0.00120478	71.5769	up	NRED	chr11	-	49400142	49401964
CUST_4865_PI419771968	AK039347	uc008sdd	0.00664247	71.5446	up	UCSC_knowngene	chr4	-	21773761	21775578
CUST_8788_PI419771968		AK019606	0.0317475	71.5318	up	NRED	chr7	+	79054580	79084077
CUST_6267_PI419771968	AK077163	uc009msd	0.0460815	71.4224	up	UCSC_knowngene	chr8	-	93340043	93341253
CUST_11679_PI419771968		AK076684	0.00179747	71.1681	up	NRED	chr2	+	166390021	166391890
CUST_13225_PI419771968		BC048603	0.000706	71.0508	up	NRED	chr2	-	109871406	109890633
CUST_7919_PI419771968		AK015456	0.00418831	70.4334	up	NRED	chr1	-	90244069	90249505
CUST_6436_PI419771968	BC048584	uc009pah	0.00599369	70.4258	up	UCSC_knowngene	chr9	+	41014243	41025646
CUST_8030_PI419771968		AK015821	0.00478802	70.2092	up	NRED	chr14	+	104298700	104299857
CUST_6367_PI419771968	AK016332	uc009nyg	0.00136817	70.0345	up	UCSC_knowngene	chr8	+	128108537	128112151
CUST_9426_PI419771968		AK030101	0.00219122	70.0245	up	NRED	chr19	+	27419240	27424128
CUST_6217_PI419771968	AK006380	uc009mce	0.00278897	69.9914	up	UCSC_knowngene	chr8	-	73530626	73550654
CUST_6218_PI419771968	AK029875	uc009mcf	0.000408	69.8881	up	UCSC_knowngene	chr8	+	73550690	73650468
CUST_3419_PI419771968	1700037C18Rik	uc007xyx	0.00105648	69.7586	up	UCSC_knowngene	chr16	-	3895180	3907757
CUST_6289_PI419771968	AK006980	uc009nbb	0.00110099	69.6988	up	UCSC_knowngene	chr8	+	107176516	107182347
CUST_9394_PI419771968		AK029564	0.00765967	69.5821	up	NRED	chr13	+	53495638	53498303
CUST_4636_PI419771968	AK132084	uc008pdl	0.00440492	69.5108	up	UCSC_knowngene	chr3	-	50862831	50878778
CUST_3202_PI419771968	AK006293	uc007vbx	0.00185307	69.2412	up	UCSC_knowngene	chr14	+	124386856	124414906
CUST_2816_PI419771968	AK015900	uc007qpo	0.00812334	69.1273	up	UCSC_knowngene	chr13	-	55028123	55031566
CUST_8706_PI419771968		AK018667	0.0181331	68.8254	up	NRED	chr4	-	114489765	114575464
CUST_2116_PI419771968	AK015944	uc007gyt	0.000683	68.8042	up	UCSC_knowngene	chr10	-	105992250	106039536
CUST_469_PI419771968		AK018857	0.000345	68.7482	up	Fantom_stringent	chr11	-	102526281	102526562
CUST_7097_PI419771968		AK006785	0.0191354	68.7385	up	NRED	chr2	+	118130649	118133902
CUST_8968_PI419771968		AK020290	0.00209688	68.672	up	NRED	chr2	-	91167804	91169051
CUST_10736_PI419771968		AK044555	0.00317453	68.6035	up	NRED	chr14	+	49498260	49499768
CUST_2784_PI419771968	AK029768	uc007qeb	0.00156518	68.0036	up	UCSC_knowngene	chr13	-	39867159	39886753
CUST_7985_PI419771968		AK015656	0.00197633	67.9653	up	NRED	chr15	-	79058632	79059795
CUST_5538_PI419771968	AK006308	uc009bsg	0.00525832	67.8035	up	UCSC_knowngene	chr6	-	43112452	43122315
CUST_3012_PI419771968	AK007151	uc007tcc	0.0186324	67.7475	up	UCSC_knowngene	chr14	+	40468950	40498581
CUST_2284_PI419771968	AK019541	uc007jjw	0.000818	67.607	up	UCSC_knowngene	chr11	-	62570679	62574060
CUST_7811_PI419771968		AK015128	0.0164369	67.5725	up	NRED	chr8	+	24645707	24646208
CUST_3159_PI419771968	AK015937	uc007utz	0.0140753	67.1275	up	UCSC_knowngene	chr14	+	86645776	86683495
CUST_6304_PI419771968	AK020829	uc009ngb	0.000931	67.0881	up	UCSC_knowngene	chr8	-	108929521	108930429
CUST_8041_PI419771968		AK015849	0.0291039	66.727	up	NRED	chr18	-	82556268	82556978
CUST_13371_PI419771968		S49663	0.0354281	66.7167	up	NRED	chr3	-	92388454	92388806
CUST_3272_PI419771968	AK040104	uc007vyr	0.00270552	66.0605	up	UCSC_knowngene	chr15	-	63245954	63311163
CUST_8808_PI419771968		AK019668	0.00117222	65.7768	up	NRED	chr6	+	84485869	84486315
CUST_2911_PI419771968	Serf1	uc007rqe	0.000755	65.6601	up	UCSC_knowngene	chr13	+	100878002	100880964
CUST_4727_PI419771968	AK015488	uc008qmt	0.00835168	65.6333	up	UCSC_knowngene	chr3	-	96152549	96161017
CUST_2772_PI419771968	AK015408	uc007qbc	0.0019512	65.5077	up	UCSC_knowngene	chr13	-	34176023	34205141
CUST_5802_PI419771968	AK161337	uc009fxb	1.8e-05	65.3915	up	UCSC_knowngene	chr7	+	28554249	28555744
CUST_5666_PI419771968	AK016007	uc009dfe	2.82e-05	65.351	up	UCSC_knowngene	chr6	-	113258659	113276673
CUST_5377_PI419771968	AK076949	uc008zhc	0.00841167	65.1666	up	UCSC_knowngene	chr5	-	120789516	120792568
CUST_409_PI419771968		AK016472	0.0339705	64.8654	up	Fantom_stringent	chr2	-	103866038	103868518
CUST_12644_PI419771968		AK131761	0.00144477	64.6568	up	NRED	chr8	+	128108537	128140570
CUST_6244_PI419771968	BC048761	uc009mmp	0.00448351	64.6255	up	UCSC_knowngene	chr8	-	87107346	87111527
CUST_1729_PI419771968	AK030268	uc007bys	0.0197861	64.2178	up	UCSC_knowngene	chr1	+	90448091	90458742
CUST_8119_PI419771968		AK016124	0.0120398	64.2003	up	NRED	chr6	-	23130481	23131489
CUST_7753_PI419771968		AK014883	0.000249	64.1662	up	NRED	chr7	+	85399181	85400537
CUST_8795_PI419771968		AK019635	0.000685	63.9884	up	NRED	chr5	-	58834480	58844237
CUST_411_PI419771968		AK016698	0.000202	63.6594	up	Fantom_stringent	chr12	-	107944260	107954572
CUST_8048_PI419771968		AK015862	0.000619	62.904	up	NRED	chr13	+	115425293	115427060
CUST_7008_PI419771968		AK006261	0.00627016	62.7673	up	NRED	chr17	-	29230360	29231406
CUST_2640_PI419771968	mKIAA0998	uc007ohm	0.00599224	62.3667	up	UCSC_knowngene	chr12	+	87280275	87402843
CUST_2607_PI419771968	AK015079	uc007nuu	0.000459	62.2853	up	UCSC_knowngene	chr12	+	72641593	72657120
CUST_6926_PI419771968		AK005683	0.00113336	62.0483	up	NRED	chr18	-	61850699	61852038
CUST_6198_PI419771968	AK005580	uc009lty	0.00121318	62.0095	up	UCSC_knowngene	chr8	-	63760318	63767669
CUST_116_PI419771968		AK006404	0.000567	61.971	up	Fantom_stringent	chr15	-	78742395	78744090
CUST_7872_PI419771968		AK015296	0.00585721	61.9272	up	NRED	chr10	-	120636196	120639705
CUST_7044_PI419771968		AK006550	0.00139732	61.7304	up	NRED	chr12	+	84223200	84224142
CUST_8820_PI419771968		AK019707	0.00256516	61.5121	up	NRED	chr6	-	3981841	3997584
CUST_6553_PI419771968	AK076672	uc009qwk	0.00220073	60.7918	up	UCSC_knowngene	chr9	+	83325153	83348180
CUST_7763_PI419771968		AK014930	0.000443	60.6877	up	NRED	chr7	-	135666076	135666662
CUST_3911_PI419771968	AK079798	uc008etf	0.00441774	60.0599	up	UCSC_knowngene	chr18	-	40596464	40599391
CUST_5875_PI419771968	AK133391	uc009gxl	0.00086	59.8327	up	UCSC_knowngene	chr7	+	53086264	53090615
CUST_1897_PI419771968	AK076929	uc007eej	0.0012315	59.4923	up	UCSC_knowngene	chr1	-	195115960	195117082
CUST_7136_PI419771968		AK006948	0.00838887	59.2404	up	NRED	chr15	+	36094646	36095202
CUST_8837_PI419771968		AK019761	0.00170069	59.146	up	NRED	chr4	-	107269390	107269831
CUST_2979_PI419771968	AK015475	uc007slx	0.000749	58.6661	up	UCSC_knowngene	chr14	-	23326395	23362045
CUST_5238_PI419771968	AK006245	uc008xnz	0.00774845	58.5878	up	UCSC_knowngene	chr5	-	66152683	66154591
CUST_11705_PI419771968		AK077207	5.08e-05	58.5702	up	NRED	chr12	+	80292052	80293400
CUST_8121_PI419771968		AK016127	0.0205176	58.3242	up	NRED	chr2	+	57034241	57040668
CUST_7801_PI419771968		AK015106	0.00459126	58.2732	up	NRED	chr15	-	78707306	78708049
CUST_5283_PI419771968	AK019798	uc008ybx	0.00840306	58.2021	up	UCSC_knowngene	chr5	-	92340427	92342429
CUST_7194_PI419771968		AK007213	0.00535441	58.1008	up	NRED	chr9	+	57950151	57950863
CUST_7196_PI419771968		AK007219	0.018555	58.0605	up	NRED	chr14	-	67943730	67954765
CUST_6564_PI419771968	AK077175	uc009qzb	0.00252856	58.0339	up	UCSC_knowngene	chr9	+	88614466	88701102
CUST_1878_PI419771968	AK005744	uc007dzu	0.000118	57.6947	up	UCSC_knowngene	chr1	+	188949016	188951731
CUST_6279_PI419771968	AK147860	uc009mzf	0.000482	57.6707	up	UCSC_knowngene	chr8	+	98330729	98345628
CUST_8303_PI419771968		AK016899	0.00203898	57.3147	up	NRED	chr4	+	107460453	107462526
CUST_3032_PI419771968	AK015198	uc007tju	0.0245161	57.2609	up	UCSC_knowngene	chr14	+	49498547	49506787
CUST_8042_PI419771968		AK015850	0.000218	57.2501	up	NRED	chr18	-	77302865	77303796
CUST_1240_PI419771968		AK133453	0.0284184	57.1505	up	Fantom_stringent	chr13	-	26375027	26404275
CUST_8257_PI419771968		AK016736	0.00647092	56.64	up	NRED	chr3	-	96632860	96635059
CUST_8139_PI419771968		AK016174	0.0059419	56.6135	up	NRED	chrX	+	125586059	125601682
CUST_1232_PI419771968		AK132855	0.00879766	56.4988	up	Fantom_stringent	chr1	-	134313030	134314575
CUST_988_PI419771968		AK079918	0.000167	56.4665	up	Fantom_stringent	chr17	+	36053930	36054834
CUST_2377_PI419771968	AK021127	uc007kvt	0.00246531	55.7764	up	UCSC_knowngene	chr11	+	88579958	88589886
CUST_7870_PI419771968		AK015294	0.0236763	55.7743	up	NRED	chr5	+	76760262	76770910
CUST_2602_PI419771968	AK015004	uc007nub	0.00165826	55.6419	up	UCSC_knowngene	chr12	-	72092601	72116604
CUST_8714_PI419771968		AK018878	0.00578871	55.4968	up	NRED	chr2	+	84926776	84927137
CUST_7995_PI419771968		AK015693	6.11e-05	55.4873	up	NRED	chr9	-	74918196	74918961
CUST_6262_PI419771968	AK077166	uc009mqw	0.00190853	55.1677	up	UCSC_knowngene	chr8	-	90568796	90642506
CUST_8297_PI419771968		AK016878	0.0153797	55.059	up	NRED	chr15	-	90176348	90177265
CUST_7148_PI419771968		AK007003	0.000273	54.932	up	NRED	chr7	+	29221624	29221972
CUST_8613_PI419771968		AK018218	3.65e-05	54.8574	up	NRED	chr3	+	94239037	94240685
CUST_1940_PI419771968	1700020N01Rik	uc007eos	0.00158949	54.5141	up	UCSC_knowngene	chr10	+	21312957	21342181
CUST_2647_PI419771968	AK015566	uc007ojx	0.00331573	54.4083	up	UCSC_knowngene	chr12	-	89672556	89680698
CUST_613_PI419771968		AK033866	0.0295853	53.7	up	Fantom_stringent	chr7	-	17456702	17460235
CUST_6610_PI419771968	AK014951	uc009rnw	0.00512002	53.6266	up	UCSC_knowngene	chr9	-	107894136	107897983
CUST_4218_PI419771968	AK076389	uc008irj	0.0481847	53.5139	up	UCSC_knowngene	chr2	+	25146739	25154448
CUST_6287_PI419771968	CKLF6	uc009nae	0.000295	53.3919	up	UCSC_knowngene	chr8	+	106774802	106787343
CUST_6568_PI419771968	AK015891	uc009qzq	0.00511758	53.3252	up	UCSC_knowngene	chr9	+	89721356	89758866
CUST_3142_PI419771968	AK076847	uc007uqj	0.0156187	53.3252	up	UCSC_knowngene	chr14	+	75321921	75326411
CUST_7140_PI419771968		AK006966	0.00373809	53.191	up	NRED	chr5	+	119558242	119564552
CUST_7875_PI419771968		AK015300	0.000885	52.9285	up	NRED	chr13	+	21102501	21128486
CUST_1112_PI419771968		AK085581	0.00416165	52.6101	up	Fantom_stringent	chr4	-	59592972	59594306
CUST_7922_PI419771968		AK015465	0.00762122	52.2515	up	NRED	chr3	+	116671184	116687324
CUST_5751_PI419771968	AK005757	uc009eth	0.000162	52.1696	up	UCSC_knowngene	chr6	+	148160809	148184185
CUST_4316_PI419771968	AK131678	uc008kcr	0.00148656	52.1526	up	UCSC_knowngene	chr2	+	73208960	73217352
CUST_4883_PI419771968	4933409K07Rik	uc008ski	0.000573	52.1424	up	UCSC_knowngene	chr4	-	41758222	41758648
CUST_3122_PI419771968	AK005591	uc007ukb	0.000907	51.8954	up	UCSC_knowngene	chr14	-	66914170	66915813
CUST_6934_PI419771968		AK005750	0.00670202	51.8219	up	NRED	chr14	-	118487791	118488495
CUST_5176_PI419771968	AK005600	uc008wti	0.00606448	51.7072	up	UCSC_knowngene	chr5	-	26786609	26819829
CUST_709_PI419771968		AK041587	0.00027	51.4646	up	Fantom_stringent	chr14	-	34864317	34915879
CUST_7835_PI419771968		AK015189	0.00552384	51.1277	up	NRED	chr12	-	55172596	55173655
CUST_1731_PI419771968	AK007030	uc007bza	0.00976253	51.1166	up	UCSC_knowngene	chr1	-	91577659	91580469
CUST_4247_PI419771968	AK076583	uc008jep	1.81e-05	50.9278	up	UCSC_knowngene	chr2	-	32088301	32091902
CUST_8822_PI419771968		AK019716	0.0159662	50.6683	up	NRED	chr3	+	131019335	131020094
CUST_4927_PI419771968	AK020205	uc008thh	0.00175895	50.4459	up	UCSC_knowngene	chr4	+	63640887	63644383
CUST_6966_PI419771968		AK005985	0.000791	50.0356	up	NRED	chr2	-	31742453	31747934
CUST_5824_PI419771968	4930479M11Rik	uc009gfv	0.000396	50.0239	up	UCSC_knowngene	chr7	-	31455740	31456619
CUST_13473_PI419771968	Gprc2a-rs5	NR_004441	0.00209031	49.7104	up	RefSeq_NR	chr7	+	48923383	48982563
CUST_132_PI419771968		AK006795	1.42e-05	49.4578	up	Fantom_stringent	chr3	-	96633748	96635973
CUST_4834_PI419771968	BC048612	uc008rva	4.66e-05	49.3464	up	UCSC_knowngene	chr3	-	156222796	156224710
CUST_7891_PI419771968		AK015372	0.000262	49.2953	up	NRED	chr2	-	152509143	152510871
CUST_13223_PI419771968		BC048582	0.00236946	49.094	up	NRED	chr1	+	36389553	36390265
CUST_7169_PI419771968		AK007113	0.00157592	48.9615	up	NRED	chr4	+	118966741	118967752
CUST_8074_PI419771968		AK015985	0.00548413	48.7415	up	NRED	chr3	-	90096222	90097905
CUST_8358_PI419771968		AK017133	0.00171624	48.5368	up	NRED	chr10	-	111023774	111031329
CUST_8118_PI419771968		AK016122	0.0197082	48.3213	up	NRED	chrX	-	22215453	22263973
CUST_10512_PI419771968		AK042044	0.00297255	48.094	up	NRED	chr10	+	37057291	37099458
CUST_5969_PI419771968	AK005667	uc009ijo	0.00710027	47.9215	up	UCSC_knowngene	chr7	-	104746858	104793622
CUST_13347_PI419771968		L09047	0.00912541	47.7522	up	NRED	chr6	-	69217887	69350091
CUST_7886_PI419771968		AK015352	0.00406885	47.5922	up	NRED	chr2	-	74136996	74145774
CUST_8194_PI419771968		AK016397	0.000101	47.3913	up	NRED	chr4	+	45333230	45334767
CUST_7977_PI419771968		AK015636	0.00458956	47.2836	up	NRED	chr7	-	128402277	128402909
CUST_2457_PI419771968	AK007092	uc007mcb	0.000209	47.1527	up	UCSC_knowngene	chr11	+	109208180	109214965
CUST_4422_PI419771968	AK016345	uc008mbl	0.000351	46.6646	up	UCSC_knowngene	chr2	-	124043414	124048067
CUST_8127_PI419771968		AK016142	0.00408475	46.6347	up	NRED	chr16	+	85819455	85827014
CUST_2993_PI419771968	AK015792	uc007srs	0.0153574	46.5623	up	UCSC_knowngene	chr14	-	26516459	26520768
CUST_2573_PI419771968	AK086288	uc007njj	0.00134275	46.5317	up	UCSC_knowngene	chr12	+	36287215	36379354
CUST_3513_PI419771968	AK078103	uc007zhj	0.000431	46.3562	up	UCSC_knowngene	chr16	+	44408714	44430175
CUST_7328_PI419771968		AK009506	0.00270094	46.1353	up	NRED	chr18	-	33075479	33098887
CUST_574_PI419771968		AK030945	0.00187451	45.9874	up	Fantom_stringent	chr4	-	102676710	102684570
CUST_2446_PI419771968	AK039104	uc007lxk	0.00935621	45.9395	up	UCSC_knowngene	chr11	+	105224565	105251956
CUST_8027_PI419771968		AK015812	0.00117866	45.8424	up	NRED	chr6	-	91639926	91641602
CUST_8104_PI419771968		AK016096	0.01222	45.7378	up	NRED	chr2	+	4958325	4962179
CUST_2612_PI419771968	AK085818	uc007nwl	0.000823	45.734	up	UCSC_knowngene	chr12	-	74465061	74510544
CUST_3226_PI419771968	AK132982	uc007vih	0.00605831	45.7222	up	UCSC_knowngene	chr15	-	18007891	18299382
CUST_5023_PI419771968	AK019643	uc008uuw	0.0010996	45.6869	up	UCSC_knowngene	chr4	+	127152091	127154084
CUST_2260_PI419771968	AK014841	uc007izb	0.00577355	45.465	up	UCSC_knowngene	chr11	-	55005220	55011184
CUST_6974_PI419771968		AK006015	0.00021	45.4522	up	NRED	chr5	+	113781066	113783973
CUST_4805_PI419771968	AK076796	uc008rnz	0.00217485	45.2704	up	UCSC_knowngene	chr3	-	140567958	140571431
CUST_7498_PI419771968		AK012985	0.00479979	44.6295	up	NRED	chr8	+	42912620	43131556
CUST_1224_PI419771968		AK131765	0.00438671	44.1507	up	Fantom_stringent	chr14	-	33326471	33326938
CUST_4921_PI419771968	AK017104	uc008tgd	0.000589	44.0478	up	UCSC_knowngene	chr4	+	63042391	63055052
CUST_9377_PI419771968		AK029296	0.0211502	43.954	up	NRED	chr3	-	130811943	130815008
CUST_3263_PI419771968	AK015560	uc007vxp	0.00190744	43.8753	up	UCSC_knowngene	chr15	+	59138502	59143568
CUST_3616_PI419771968	AK019751	uc008aew	0.00142673	43.7437	up	UCSC_knowngene	chr17	-	4119445	4122113
CUST_5254_PI419771968	AK016734	uc008xrt	0.00530171	43.725	up	UCSC_knowngene	chr5	+	73035649	73037779
CUST_2287_PI419771968	AK133035	uc007jkk	0.00750333	43.6695	up	UCSC_knowngene	chr11	-	62812616	62817636
CUST_6917_PI419771968		AK005595	0.00452878	43.6591	up	NRED	chr10	+	55803635	55826182
CUST_6937_PI419771968		AK005767	0.0150264	43.4006	up	NRED	chr5	-	82548703	82550387
CUST_4933_PI419771968	AK131821	uc008tiy	0.000147	43.3415	up	UCSC_knowngene	chr4	+	73437147	73444276
CUST_8791_PI419771968		AK019615	0.000912	43.1953	up	NRED	chr2	+	74417132	74422599
CUST_6967_PI419771968		AK005986	0.0214206	43.1906	up	NRED	chr13	-	64529087	64533710
CUST_1217_PI419771968		AK131672	0.000748	43.1744	up	Fantom_stringent	chr7	+	53069391	53070289
CUST_1234_PI419771968		AK132899	0.0136672	42.5636	up	Fantom_stringent	chr4	-	137548032	137549201
CUST_7920_PI419771968		AK015459	0.00554751	42.2707	up	NRED	chr10	-	21038893	21061861
CUST_2860_PI419771968	AK016836	uc007rcr	0.00913302	42.1972	up	UCSC_knowngene	chr13	+	70098710	70102315
CUST_3160_PI419771968	Dia2(AK006102)	uc007uuc	6.46e-05	42.1771	up	UCSC_knowngene	chr14	-	87171867	87189721
CUST_7896_PI419771968		AK015398	0.0041237	42.1394	up	NRED	chr6	-	146794797	146795725
CUST_8803_PI419771968		AK019651	0.00112212	41.9617	up	NRED	chr7	-	13535041	13535415
CUST_5017_PI419771968	AK006677	uc008urz	0.000947	41.729	up	UCSC_knowngene	chr4	+	124905840	124919296
CUST_7913_PI419771968		AK015448	0.00535025	41.7104	up	NRED	chr11	-	62803954	62817630
CUST_8249_PI419771968		AK016706	0.0044081	41.6091	up	NRED	chr6	-	54765858	54766967
CUST_5586_PI419771968	AK079709	uc009cff	0.000982	41.3792	up	UCSC_knowngene	chr6	+	67065666	67067028
CUST_5510_PI419771968	AK076827	uc009bla	0.0353327	41.2297	up	UCSC_knowngene	chr6	+	38668833	38692699
CUST_7804_PI419771968		AK015113	0.00528529	40.9717	up	NRED	chr3	-	148171151	148171995
CUST_5255_PI419771968	AK006930	uc008xsq	0.0194605	40.9546	up	UCSC_knowngene	chr5	+	73548252	73549119
CUST_8172_PI419771968		AK016304	0.00987416	40.9475	up	NRED	chr3	+	105673820	105675550
CUST_8233_PI419771968		AK016606	0.00274722	40.9395	up	NRED	chr18	-	83587045	83592871
CUST_3596_PI419771968	AK160158	uc007zzn	0.00294648	40.7461	up	UCSC_knowngene	chr16	-	93343960	93358957
CUST_7778_PI419771968		AK015032	0.000822	40.6791	up	NRED	chr10	-	25499119	25557243
CUST_8811_PI419771968		AK019678	0.000878	40.5857	up	NRED	chr3	+	116366649	116367064
CUST_4417_PI419771968	AK076706	uc008mbb	0.000261	40.5393	up	UCSC_knowngene	chr2	+	122528640	122543966
CUST_8106_PI419771968		AK016102	0.00623906	40.537	up	NRED	chr16	+	84371387	84375750
CUST_4767_PI419771968	Ptbp2	uc008rdm	0.0026831	40.2367	up	UCSC_knowngene	chr3	-	119463473	119486176
CUST_3971_PI419771968	AK076657	uc008fny	0.00249462	39.9745	up	UCSC_knowngene	chr18	-	70106598	70129263
CUST_8232_PI419771968		AK016604	0.00514139	39.9048	up	NRED	chr1	+	3063333	3064403
CUST_7120_PI419771968		AK006872	0.000182	39.8583	up	NRED	chr17	-	29088805	29089327
CUST_7152_PI419771968		AK007026	0.0017076	39.7852	up	NRED	chr14	+	103745805	103759695
CUST_8841_PI419771968		AK019765	0.00147282	39.7794	up	NRED	chrX	+	112040597	112042206
CUST_7795_PI419771968		AK015093	0.000514	39.6632	up	NRED	chr16	+	52829235	52971987
CUST_8308_PI419771968		AK016925	0.00368453	39.6554	up	NRED	chr1	+	138112650	138121648
CUST_3179_PI419771968	BC099544	uc007uya	0.0116855	39.5336	up	UCSC_knowngene	chr14	+	106505415	106535076
CUST_10458_PI419771968		AK041283	0.0005	39.2652	up	NRED	chr17	+	79754038	79757362
CUST_2944_PI419771968	AK005657	uc007ryt	0.0191949	39.2419	up	UCSC_knowngene	chr13	+	119344960	119377511
CUST_7126_PI419771968		AK006903	0.000776	39.0895	up	NRED	chr13	+	58248309	58250335
CUST_7971_PI419771968		AK015621	0.0182905	39.0833	up	NRED	chr10	-	126225919	126230766
CUST_2699_PI419771968	AK076722	uc007pbs	1.24e-05	39.0813	up	UCSC_knowngene	chr12	-	111975471	111976563
CUST_7987_PI419771968		AK015659	0.0081104	39.0723	up	NRED	chr9	+	106150290	106151238
CUST_6343_PI419771968	AK006561	uc009nru	0.00389689	38.9893	up	UCSC_knowngene	chr8	+	124068287	124071552
CUST_6025_PI419771968	AK016693	uc009jia	0.0117184	38.9614	up	UCSC_knowngene	chr7	-	121458994	121558675
CUST_101_PI419771968		AK005768	0.000142	38.649	up	Fantom_stringent	chr6	-	83711752	83712502
CUST_13517_PI419771968	4930594C11Rik	NR_024017	0.0195841	38.5407	up	RefSeq_NR	chr1	-	37542695	37545450
CUST_5256_PI419771968	BC048655	uc008xsr	0.0416287	38.448	up	UCSC_knowngene	chr5	-	73659826	73675423
CUST_1625_PI419771968	Smap1	uc007amf	0.000581	38.3519	up	UCSC_knowngene	chr1	-	23851684	23916575
CUST_1074_PI419771968		AK083834	0.00163235	38.3164	up	Fantom_stringent	chr5	+	144519193	144527843
CUST_8787_PI419771968		AK019602	0.000279	38.2807	up	NRED	chr1	+	158869968	158870325
CUST_12940_PI419771968		AK161422	0.0008	38.0322	up	NRED	chr7	+	26180432	26351436
CUST_5409_PI419771968	AK076755	uc008zuz	0.00350208	38.009	up	UCSC_knowngene	chr5	-	134010459	134074276
CUST_9427_PI419771968		AK030119	0.00494997	37.9302	up	NRED	chr3	+	49129601	49171281
CUST_6959_PI419771968		AK005920	0.00551791	37.7949	up	NRED	chr3	-	108028491	108028886
CUST_8199_PI419771968		AK016409	0.0128397	37.7501	up	NRED	chr4	-	19959992	19968711
CUST_12667_PI419771968		AK133162	0.00334556	37.6667	up	NRED	chr15	+	82683285	82689885
CUST_8226_PI419771968		AK016576	0.00229291	37.6295	up	NRED	chr18	-	37911925	37927896
CUST_6991_PI419771968		AK006142	0.0323299	37.6149	up	NRED	chr16	-	46183264	46183717
CUST_11453_PI419771968		AK052663	0.000329	37.5531	up	NRED	chr15	-	78856885	78859042
CUST_3619_PI419771968	AK006572	uc008afq	0.000853	37.3825	up	UCSC_knowngene	chr17	-	5987596	5988187
CUST_4910_PI419771968	AK010245	uc008sxm	0.00339365	37.3699	up	UCSC_knowngene	chr4	-	56233488	56237393
CUST_7108_PI419771968		AK006838	0.00493579	37.35	up	NRED	chr6	-	143541872	143599808
CUST_1422_PI419771968		AK155508	0.00468876	37.155	up	Fantom_stringent	chr5	+	123585769	123587699
CUST_7005_PI419771968		AK006237	0.0165145	37.1246	up	NRED	chr16	-	59466697	59469064
CUST_4473_PI419771968	DQ691258	uc008nbs	0.00257436	37.0503	up	UCSC_knowngene	chr2	-	151229693	151230511
CUST_6286_PI419771968	AK016594	uc009mzw	0.00413834	36.9741	up	UCSC_knowngene	chr8	+	106127698	106204282
CUST_4047_PI419771968	2810441K11Rik	uc008gqb	0.00531592	36.9342	up	UCSC_knowngene	chr19	-	10608354	10630241
CUST_2841_PI419771968	AK006304	uc007qxz	0.0117774	36.6202	up	UCSC_knowngene	chr13	-	63777068	63835606
CUST_7192_PI419771968		AK007207	0.0288054	36.5333	up	NRED	chr16	-	34935940	34939415
CUST_6498_PI419771968	AK015493	uc009pwy	0.00265468	36.5092	up	UCSC_knowngene	chr9	+	58302979	58317430
CUST_8716_PI419771968		AK018906	0.0148651	36.4712	up	NRED	chr1	-	171862828	171864379
CUST_8857_PI419771968		AK019842	0.00400562	36.2582	up	NRED	chr12	-	112398060	112422702
CUST_8153_PI419771968		AK016235	0.0121845	36.2218	up	NRED	chr5	-	31438129	31439717
CUST_2755_PI419771968	AK016580	uc007pwo	0.0296034	36.1582	up	UCSC_knowngene	chr13	+	24997461	25006141
CUST_3025_PI419771968	AK015914	uc007tgr	0.012102	35.958	up	UCSC_knowngene	chr14	+	46163357	46182552
CUST_6081_PI419771968	AK016032	uc009kfa	0.00119557	35.9478	up	UCSC_knowngene	chr7	+	145745924	145758677
CUST_8325_PI419771968		AK017011	0.0102321	35.9378	up	NRED	chr13	+	91398995	91414559
CUST_1965_PI419771968	DDO(AK165344)	uc007exc	0.00273214	35.828	up	UCSC_knowngene	chr10	+	40349840	40401653
CUST_4221_PI419771968	AK039020	uc008isw	0.00777885	35.715	up	UCSC_knowngene	chr2	+	25471526	25487278
CUST_7978_PI419771968		AK015637	0.000347	35.6849	up	NRED	chr4	+	43013017	43013929
CUST_11702_PI419771968		AK077098	0.0164881	35.6792	up	NRED	chr16	-	87001171	87024042
CUST_7909_PI419771968		AK015433	0.00159485	35.611	up	NRED	chr2	-	179385452	179386327
CUST_8266_PI419771968		AK016769	5.02e-05	35.5205	up	NRED	chr10	+	117362514	117385363
CUST_2197_PI419771968	AK006690	uc007iay	0.000344	35.499	up	UCSC_knowngene	chr11	+	11768125	11785323
CUST_2066_PI419771968	AK054042	uc007gkp	0.00987164	35.4986	up	UCSC_knowngene	chr10	+	83980789	83986015
CUST_8574_PI419771968		AK017998	0.00223889	35.2683	up	NRED	chr14	-	35485651	35486948
CUST_8044_PI419771968		AK015852	0.0043004	35.1202	up	NRED	chr3	+	102739371	102740221
CUST_8786_PI419771968		AK019595	0.0204671	35.0156	up	NRED	chr6	+	142938129	142938512
CUST_8830_PI419771968		AK019741	0.00106917	35.0022	up	NRED	chr9	-	111814814	111821170
CUST_3781_PI419771968	AK079662	uc008dex	0.0148133	34.9494	up	UCSC_knowngene	chr17	-	58819769	58975464
CUST_13348_PI419771968		L09051	0.00322048	34.926	up	NRED	chr6	-	69217884	69350091
CUST_7141_PI419771968		AK006976	0.0223244	34.8892	up	NRED	chr2	-	102025507	102026212
CUST_8350_PI419771968		AK017098	0.00818147	34.8075	up	NRED	chr4	-	48983567	48985037
CUST_3162_PI419771968	AK015818	uc007uvi	0.0101864	34.7422	up	UCSC_knowngene	chr14	+	100612407	100631987
CUST_7153_PI419771968		AK007029	0.00618383	34.637	up	NRED	chr11	-	80241233	80242677
CUST_6830_PI419771968		AK002420	0.000908	34.5888	up	NRED	chr11	+	120210037	120212502
CUST_2569_PI419771968	AK016682	uc007nig	0.0015055	34.3873	up	UCSC_knowngene	chr12	-	33609821	33638654
CUST_3762_PI419771968	Gtpbp2	uc008crv	0.00113065	34.3862	up	UCSC_knowngene	chr17	+	46298019	46299088
CUST_7033_PI419771968		AK006417	0.0011683	34.3712	up	NRED	chr3	-	45220505	45243231
CUST_6945_PI419771968		AK005824	0.00149566	34.2325	up	NRED	chr15	+	64146058	64147638
CUST_6935_PI419771968		AK005752	0.0118733	34.2103	up	NRED	chr5	+	122285231	122285836
CUST_8241_PI419771968		AK016653	0.000279	34.1437	up	NRED	chr10	+	43546385	43553107
CUST_7168_PI419771968		AK007111	0.0394221	34.087	up	NRED	chr6	+	140257591	140258261
CUST_8824_PI419771968		AK019720	0.000376	33.9853	up	NRED	chr1	+	36067916	36068739
CUST_3497_PI419771968	AK015360	uc007zdf	0.0174137	33.974	up	UCSC_knowngene	chr16	-	36880604	36897275
CUST_2683_PI419771968	AK015628	uc007ozg	0.00306423	33.9608	up	UCSC_knowngene	chr12	-	107939370	107954543
CUST_8082_PI419771968		AK016022	0.0329561	33.877	up	NRED	chr17	-	46016798	46018389
CUST_6979_PI419771968		AK006047	0.00784165	33.874	up	NRED	chr1	+	80442506	80472235
CUST_8799_PI419771968		AK019644	0.011066	33.7578	up	NRED	chr10	+	114194802	114222159
CUST_2447_PI419771968	AK016887	uc007lxt	0.0105446	33.5507	up	UCSC_knowngene	chr11	-	105826921	105847008
CUST_2605_PI419771968	AK014974	uc007nur	0.0016637	33.5235	up	UCSC_knowngene	chr12	-	72418607	72422647
CUST_8285_PI419771968		AK016846	0.0067556	33.5117	up	NRED	chr13	+	96477430	96479000
CUST_1231_PI419771968		AK132795	0.0033344	33.3188	up	Fantom_stringent	chr5	-	125202368	125205449
CUST_6645_PI419771968	AK076661	uc009sbl	0.00858339	33.1583	up	UCSC_knowngene	chr9	-	119796566	119803981
CUST_7742_PI419771968		AK014826	0.0219255	33.0082	up	NRED	chr10	-	81589420	81591032
CUST_3167_PI419771968	AK015289	uc007uwz	0.00234951	32.9691	up	UCSC_knowngene	chr14	-	104376844	104397501
CUST_3782_PI419771968	AK015703	uc008dfa	0.00940006	32.7275	up	UCSC_knowngene	chr17	+	59135673	59151561
CUST_2398_PI419771968	AK002860	uc007lbs	0.0040761	32.7184	up	UCSC_knowngene	chr11	-	96152349	96168224
CUST_7381_PI419771968		AK010802	0.000399	32.6678	up	NRED	chr4	-	73896768	73898483
CUST_9482_PI419771968		AK031079	0.0184297	32.5221	up	NRED	chr7	-	132427538	132481786
CUST_7074_PI419771968		AK006697	0.0261182	32.522	up	NRED	chr14	+	64804298	64804812
CUST_2855_PI419771968	BC100427	uc007rbs	0.00767972	32.4956	up	UCSC_knowngene	chr13	+	67932042	67944229
CUST_9443_PI419771968		AK030377	0.00596132	32.4789	up	NRED	chr1	-	196781952	196803153
CUST_3493_PI419771968	AK153575	uc007zak	0.00844882	31.923	up	UCSC_knowngene	chr16	-	33770515	33787198
CUST_2062_PI419771968	AK006461	uc007gjx	0.0117904	31.7931	up	UCSC_knowngene	chr10	+	82274867	82286987
CUST_565_PI419771968		AK030060	0.00474987	31.6722	up	Fantom_stringent	chr3	+	8743681	8746824
CUST_400_PI419771968		AK016118	0.0254955	31.5445	up	Fantom_stringent	chr3	+	107677712	107678398
CUST_2539_PI419771968	AK006240	uc007nan	0.00679392	31.4755	up	UCSC_knowngene	chr12	-	9572041	9577391
CUST_12707_PI419771968		AK136184	0.00321031	31.4415	up	NRED	chr10	-	16670900	16675819
CUST_8340_PI419771968		AK017066	0.00914537	31.3211	up	NRED	chr18	-	32272113	32280067
CUST_8142_PI419771968		AK016186	0.00461167	31.247	up	NRED	chr7	-	127245124	127246719
CUST_7138_PI419771968		AK006955	0.036267	31.123	up	NRED	chr4	+	127208865	127210129
CUST_6549_PI419771968	AK076688	uc009qvk	0.00200349	30.8797	up	UCSC_knowngene	chr9	+	81349003	81354573
CUST_10403_PI419771968		AK040480	0.0345748	30.8447	up	NRED	chr12	+	102753334	102789203
CUST_6121_PI419771968	AK082314	uc009kuc	0.00880042	30.8102	up	UCSC_knowngene	chr8	-	8044576	8484721
CUST_8075_PI419771968		AK015994	0.00657443	30.6248	up	NRED	chr3	-	134067106	134086599
CUST_3309_PI419771968	AK007154	uc007wnj	0.00434441	30.547	up	UCSC_knowngene	chr15	+	76914827	76926744
CUST_8138_PI419771968		AK016164	0.000419	30.4649	up	NRED	chr5	+	34461388	34477988
CUST_5308_PI419771968	Mapk10	uc008yjh	0.0100597	30.3538	up	UCSC_knowngene	chr5	-	103590923	103640353
CUST_7212_PI419771968		AK007311	0.0343069	30.3524	up	NRED	chr14	-	48980247	48980948
CUST_6303_PI419771968	AK015712	uc009nga	0.0117446	30.2645	up	UCSC_knowngene	chr8	+	108806185	108859654
CUST_3136_PI419771968	AK015316	uc007upe	0.000561	30.09	up	UCSC_knowngene	chr14	+	72256515	72320245
CUST_4661_PI419771968	BC062821	uc008pmf	0.0466437	29.8718	up	UCSC_knowngene	chr3	+	68935154	68961099
CUST_6366_PI419771968	AK148282	uc009nxr	0.00287555	29.7945	up	UCSC_knowngene	chr8	+	127355597	127387603
CUST_3648_PI419771968	ENSMUSG00000052469	uc008amf	0.00145711	29.5595	up	UCSC_knowngene	chr17	+	13547437	13569627
CUST_8839_PI419771968		AK019763	0.000595	29.4625	up	NRED	chr8	+	27193087	27199761
CUST_8849_PI419771968		AK019805	0.00400723	29.2968	up	NRED	chr8	+	116041181	116074708
CUST_8173_PI419771968		AK016308	0.000447	29.2472	up	NRED	chr8	-	108383346	108384322
CUST_8129_PI419771968		AK016144	7.43e-05	29.1473	up	NRED	chr12	+	100807949	100809624
CUST_7881_PI419771968		AK015326	0.029774	29.0693	up	NRED	chr14	+	118444195	118446086
CUST_8790_PI419771968		AK019609	0.0012124	28.8174	up	NRED	chr9	+	56779437	56781352
CUST_13042_PI419771968		AB160648	0.0101152	28.8062	up	NRED	chr12	-	116861371	116861665
CUST_8120_PI419771968		AK016126	0.0133426	28.763	up	NRED	chr3	+	150957966	150959267
CUST_8781_PI419771968		AK019581	3.78e-05	28.6832	up	NRED	chr13	+	120197270	120198234
CUST_1628_PI419771968	AK087209	uc007anc	0.000166	28.5733	up	UCSC_knowngene	chr1	-	30775398	30776806
CUST_7895_PI419771968		AK015390	0.00380908	28.4571	up	NRED	chr6	-	29260771	29262223
CUST_7867_PI419771968		AK015283	0.00504049	28.4485	up	NRED	chr10	-	10964587	11000797
CUST_5004_PI419771968	AK005616	uc008umk	0.000326	28.3985	up	UCSC_knowngene	chr4	-	119087360	119088119
CUST_8061_PI419771968		AK015927	0.00261351	28.3522	up	NRED	chr6	-	148608499	148626522
CUST_7132_PI419771968		AK006928	0.000591	28.3281	up	NRED	chr9	-	54996288	54997192
CUST_4368_PI419771968	AK076716	uc008ljh	0.00842504	28.2795	up	UCSC_knowngene	chr2	-	103832651	103868518
CUST_3451_PI419771968	Ypel1	uc007yjw	0.00170494	28.2481	up	UCSC_knowngene	chr16	+	17070403	17087250
CUST_7859_PI419771968		AK015253	0.000616	28.2117	up	NRED	chr9	+	57238876	57248171
CUST_9400_PI419771968		AK029702	0.00865659	28.0817	up	NRED	chr12	+	70891341	70894491
CUST_4855_PI419771968	AK076817	uc008sae	0.000416	28.0566	up	UCSC_knowngene	chr4	-	11926620	11936190
CUST_8777_PI419771968		AK019571	0.000142	28.0399	up	NRED	chr4	+	107626536	107633326
CUST_6882_PI419771968		AK004326	0.000691	27.9124	up	NRED	chr5	+	20234211	20234710
CUST_8088_PI419771968		AK016044	0.0340517	27.9009	up	NRED	chr8	-	112789147	112791362
CUST_7988_PI419771968		AK015660	0.00346523	27.7808	up	NRED	chr18	-	57664075	57693406
CUST_8067_PI419771968		AK015962	0.0069758	27.7795	up	NRED	chr11	-	58768024	58768790
CUST_8305_PI419771968		AK016911	0.00472788	27.7641	up	NRED	chr10	-	75298720	75300169
CUST_1017_PI419771968		AK080704	0.00615525	27.7316	up	Fantom_stringent	chr3	+	17693919	17695329
CUST_6871_PI419771968		AK003944	0.025649	27.6551	up	NRED	chr8	+	109111042	109118720
CUST_9620_PI419771968		AK032526	0.000323	27.6149	up	NRED	chr16	-	88202990	88207335
CUST_112_PI419771968		AK006165	0.000242	27.5274	up	Fantom_stringent	chr14	+	77077374	77086899
CUST_7181_PI419771968		AK007160	0.00750857	27.4921	up	NRED	chr7	-	48315986	48345213
CUST_150_PI419771968		AK007271	0.0383246	27.4382	up	Fantom_stringent	chr6	-	83711752	83712487
CUST_4860_PI419771968	AK005641	uc008sbh	0.00148485	27.3945	up	UCSC_knowngene	chr4	+	14874583	14880177
CUST_1620_PI419771968	AK135932	uc007akd	0.000143	27.155	up	UCSC_knowngene	chr1	+	17158485	17163184
CUST_1139_PI419771968		AK087434	0.000262	26.958	up	Fantom_stringent	chr6	+	125181293	125189952
CUST_5163_PI419771968	Drctnnb1a	uc008wqw	0.000381	26.8913	up	UCSC_knowngene	chr5	-	23494667	23536130
CUST_3916_PI419771968	AK016280	uc008eud	0.00896972	26.8883	up	UCSC_knowngene	chr18	-	43228329	43330928
CUST_4289_PI419771968	AK017239	uc008jth	1.03e-05	26.8529	up	UCSC_knowngene	chr2	-	59220558	59224739
CUST_8780_PI419771968		AK019580	0.00136259	26.8369	up	NRED	chr5	-	39833239	39834813
CUST_8357_PI419771968		AK017132	6.4e-05	26.7131	up	NRED	chr3	+	58496493	58601253
CUST_12279_PI419771968		AK084991	0.00176879	26.699	up	NRED	chr9	-	20950331	20954023
CUST_1656_PI419771968	AK006937	uc007axl	0.00262066	26.64	up	UCSC_knowngene	chr1	-	51514777	51515775
CUST_6699_PI419771968	Rp2h	uc009ssx	0.00717881	26.5895	up	UCSC_knowngene	chrX	+	19941733	19982779
CUST_8072_PI419771968		AK015982	0.00173088	26.5044	up	NRED	chr4	-	123594199	123595266
CUST_5486_PI419771968	AK005895	uc009bfg	0.00391642	26.5038	up	UCSC_knowngene	chr6	+	30410984	30413313
CUST_8319_PI419771968		AK016992	0.006629	26.4679	up	NRED	chr5	-	116951382	116952725
CUST_8309_PI419771968		AK016932	0.00111053	26.4501	up	NRED	chr10	-	81778119	81779304
CUST_9414_PI419771968		AK029895	0.000816	26.387	up	NRED	chr10	+	94726950	94729647
CUST_7751_PI419771968		AK014875	0.000629	26.3611	up	NRED	chr12	-	12358327	12399281
CUST_7865_PI419771968		AK015278	0.0315021	26.3403	up	NRED	chr6	+	34809704	34810937
CUST_13084_PI419771968		AJ409467	0.00843371	26.3135	up	NRED	chr2	-	151080847	151081091
CUST_7819_PI419771968		AK015140	0.00211859	26.2882	up	NRED	chr16	-	95518790	95523268
CUST_1221_PI419771968		AK131689	0.00579983	26.2648	up	Fantom_stringent	chr8	+	70892357	70896192
CUST_8094_PI419771968		AK016055	0.0197465	26.1947	up	NRED	chr9	-	3184956	3185814
CUST_8313_PI419771968		AK016962	0.00110635	26.1685	up	NRED	chr7	+	116637610	116638627
CUST_12071_PI419771968		AK082424	0.000703	26.0941	up	NRED	chr11	+	20641786	20644967
CUST_13037_PI419771968		AB047759	0.00276876	26.0894	up	NRED	chr9	+	110717720	110719438
CUST_5199_PI419771968	AK016658	uc008xdq	0.00392156	26.0053	up	UCSC_knowngene	chr5	+	35704201	35710326
CUST_5942_PI419771968	AK006397	uc009ibe	0.0169228	25.9291	up	UCSC_knowngene	chr7	+	87896707	87903498
CUST_7911_PI419771968		AK015439	0.0022628	25.8346	up	NRED	chr4	-	131977247	131977882
CUST_3592_PI419771968	AK006730	uc007zyy	0.0123496	25.7629	up	UCSC_knowngene	chr16	-	92309102	92312711
CUST_2572_PI419771968	Hdrpa	uc007niz	0.00542608	25.7525	up	UCSC_knowngene	chr12	-	34780741	35601767
CUST_3346_PI419771968	AK005608	uc007xax	0.00123229	25.744	up	UCSC_knowngene	chr15	-	83187963	83197441
CUST_5477_PI419771968	AK052888	uc009azl	0.0120069	25.6885	up	UCSC_knowngene	chr6	+	17148106	17160152
CUST_1233_PI419771968		AK132893	0.00301782	25.679	up	Fantom_stringent	chr1	+	135506987	135510999
CUST_7641_PI419771968		AK014034	0.0165518	25.6519	up	NRED	chr7	-	91012851	91013801
CUST_145_PI419771968		AK007099	0.00146754	25.5417	up	Fantom_stringent	chr17	-	30759393	30761234
CUST_8288_PI419771968		AK016858	0.0266749	25.4723	up	NRED	chr8	+	79829431	79837198
CUST_7130_PI419771968		AK006913	0.00772374	25.4531	up	NRED	chr11	+	69107652	69108979
CUST_11684_PI419771968		AK076721	0.00140133	25.3707	up	NRED	chr5	-	30061907	30062476
CUST_3544_PI419771968	AK029643	uc007zqp	0.01236	25.2199	up	UCSC_knowngene	chr16	+	66892763	66901438
CUST_2151_PI419771968	AK076845	uc007hha	0.0123163	25.2139	up	UCSC_knowngene	chr10	+	124745967	124747735
CUST_6475_PI419771968	AK033819	uc009pll	0.000667	25.1981	up	UCSC_knowngene	chr9	-	51647611	51683990
CUST_680_PI419771968		AK039489	0.000427	25.1035	up	Fantom_stringent	chr13	-	44288957	44311856
CUST_2094_PI419771968	AK029692	uc007gvg	0.00735977	25.0381	up	UCSC_knowngene	chr10	+	93359902	93364701
CUST_7935_PI419771968		AK015514	0.0048585	24.9648	up	NRED	chr6	-	91962387	91966111
CUST_7129_PI419771968		AK006912	0.00443153	24.9588	up	NRED	chr2	-	172293945	172294429
CUST_4542_PI419771968	AK015810	uc008ocf	0.00170732	24.9331	up	UCSC_knowngene	chr2	-	170404917	170427517
CUST_7067_PI419771968		AK006665	0.00113063	24.9038	up	NRED	chr5	-	88720385	88730048
CUST_3430_PI419771968	AK154225	uc007ybf	0.000176	24.8541	up	UCSC_knowngene	chr16	+	4964381	4979055
CUST_4165_PI419771968	AK019620	uc008iaa	0.00855055	24.7287	up	UCSC_knowngene	chr19	+	57348449	57351542
CUST_4171_PI419771968	AK076683	uc008iaz	0.000519	24.6999	up	UCSC_knowngene	chr19	-	59001329	59018144
CUST_4589_PI419771968	AK005828	uc008oom	0.0139216	24.6822	up	UCSC_knowngene	chr3	-	7925303	7954887
CUST_8021_PI419771968		AK015798	0.0045994	24.601	up	NRED	chr2	-	16840305	16935353
CUST_8256_PI419771968		AK016735	0.00930896	24.5474	up	NRED	chr2	-	4056524	4062185
CUST_2157_PI419771968	AK077682	uc007hip	0.00464649	24.4197	up	UCSC_knowngene	chr10	+	126632304	126639699
CUST_5928_PI419771968	AK030117	uc009hrh	0.00178823	24.4123	up	UCSC_knowngene	chr7	-	80926314	80961317
CUST_5518_PI419771968	TCRB	uc009bnv	0.00216517	24.3123	up	UCSC_knowngene	chr6	+	41012510	41286443
CUST_5164_PI419771968	AK138592	uc008wre	0.00169064	24.306	up	UCSC_knowngene	chr5	-	23872009	23889400
CUST_392_PI419771968		AK015723	0.000747	24.2703	up	Fantom_stringent	chr8	-	35646078	35647547
CUST_2777_PI419771968	AK005856	uc007qcc	0.0105897	24.1842	up	UCSC_knowngene	chr13	+	35273491	35279883
CUST_7174_PI419771968		AK007127	0.000624	24.1559	up	NRED	chr5	+	122285203	122285716
CUST_6652_PI419771968	AK016372	uc009sdj	0.00338912	24.1368	up	UCSC_knowngene	chr9	+	121496114	121513099
CUST_8024_PI419771968		AK015804	0.00297711	24.0978	up	NRED	chr10	+	61053988	61054965
CUST_7183_PI419771968		AK007172	0.000786	23.9479	up	NRED	chrX	-	67182433	67396763
CUST_7776_PI419771968		AK015030	0.0371011	23.9131	up	NRED	chr2	+	78685650	78686739
CUST_8845_PI419771968		AK019771	0.0115981	23.8253	up	NRED	chr11	+	62448205	62452290
CUST_6215_PI419771968	AK076954	uc009lzq	0.00380982	23.8131	up	UCSC_knowngene	chr8	+	72797490	72803813
CUST_7091_PI419771968		AK006761	0.0270407	23.7316	up	NRED	chr6	-	134195688	134196384
CUST_2606_PI419771968	AK050197	uc007nus	0.00192265	23.7146	up	UCSC_knowngene	chr12	+	72456427	72599698
CUST_7083_PI419771968		AK006721	0.00205564	23.6442	up	NRED	chr13	-	51009339	51025250
CUST_8817_PI419771968		AK019696	0.00101183	23.4845	up	NRED	chr9	+	106793877	106796166
CUST_9967_PI419771968		AK035884	0.00307807	23.2607	up	NRED	chr10	-	12725148	12728858
CUST_8793_PI419771968		AK019618	0.00344924	23.2446	up	NRED	chr11	-	30671292	30671674
CUST_1717_PI419771968	AK087744	uc007btl	0.000853	23.2362	up	UCSC_knowngene	chr1	+	85102520	85110610
CUST_5729_PI419771968	AK019585	uc009elp	0.000798	23.2113	up	UCSC_knowngene	chr6	+	135608933	135633409
CUST_6627_PI419771968	AK077029	uc009rxc	0.0227269	23.1196	up	UCSC_knowngene	chr9	-	114146814	114226146
CUST_5078_PI419771968	AK017111	uc008vss	0.000358	23.1183	up	UCSC_knowngene	chr4	-	146437474	146442545
CUST_5305_PI419771968	AK076906	uc008yik	0.00565735	23.1081	up	UCSC_knowngene	chr5	-	101339021	101342726
CUST_12939_PI419771968		AK161360	0.00460855	23.0351	up	NRED	chr5	-	35733321	35734561
CUST_6594_PI419771968	AK131742	uc009rha	0.0109019	22.9579	up	UCSC_knowngene	chr9	-	103821737	103862465
CUST_12943_PI419771968		AK161453	0.00738772	22.9449	up	NRED	chr8	+	98330874	98334600
CUST_7098_PI419771968		AK006792	0.0131366	22.9314	up	NRED	chr9	-	63886271	63889272
CUST_7134_PI419771968		AK006945	0.0013097	22.9178	up	NRED	chr2	-	181572121	181572504
CUST_7028_PI419771968		AK006390	0.000998	22.9067	up	NRED	chr6	-	48486580	48487473
CUST_5597_PI419771968	AK053994	uc009cjc	2.5e-05	22.8882	up	UCSC_knowngene	chr6	+	72649207	72655084
CUST_8498_PI419771968		BC003765	0.00108576	22.831	up	NRED	chr2	-	65961899	65962707
CUST_651_PI419771968		AK036704	0.0214112	22.8171	up	Fantom_stringent	chr10	+	39619134	39627737
CUST_8800_PI419771968		AK019646	0.0447834	22.811	up	NRED	chr6	-	117445084	117448928
CUST_7118_PI419771968		AK006865	3.02e-05	22.6434	up	NRED	chr1	-	97887235	97918335
CUST_1687_PI419771968	AK015421	uc007bfg	0.0191034	22.5567	up	UCSC_knowngene	chr1	-	61813988	61898114
CUST_687_PI419771968		AK040091	7.84e-05	22.5383	up	Fantom_stringent	chr9	-	44862905	44863427
CUST_393_PI419771968		AK015735	0.026741	22.5358	up	Fantom_stringent	chr16	+	11176267	11178361
CUST_1923_PI419771968	AK029503	uc007els	0.0179611	22.456	up	UCSC_knowngene	chr10	-	16671101	16815588
CUST_8292_PI419771968		AK016871	0.00532154	22.2312	up	NRED	chr12	-	34014456	34015332
CUST_8210_PI419771968		AK016453	0.0138014	22.2043	up	NRED	chr17	-	33920284	33922669
CUST_8197_PI419771968		AK016405	0.0017543	22.1923	up	NRED	chr14	-	51937009	51965164
CUST_6464_PI419771968	AK140089	uc009phk	0.000227	22.1737	up	UCSC_knowngene	chr9	+	46721685	46730650
CUST_4790_PI419771968	AK076734	uc008rjv	0.000592	22.0646	up	UCSC_knowngene	chr3	+	131422768	131693705
CUST_7990_PI419771968		AK015663	0.00247049	21.8483	up	NRED	chr18	-	77303132	77303866
CUST_2775_PI419771968	AK012214	uc007qbw	0.0159211	21.8257	up	UCSC_knowngene	chr13	+	35055850	35082321
CUST_4549_PI419771968	AK018940	uc008ods	0.00121665	21.7597	up	UCSC_knowngene	chr2	+	173116755	173117097
CUST_437_PI419771968		AK017892	0.0012029	21.7417	up	Fantom_stringent	chr1	-	155746441	155747358
CUST_13085_PI419771968		AJ409473	0.00104666	21.5848	up	NRED	chr10	+	18519750	18520117
CUST_10361_PI419771968		AK039921	0.00668596	21.5546	up	NRED	chr5	+	86495836	86496920
CUST_1716_PI419771968	BC100303	uc007btk	0.00286831	21.5452	up	UCSC_knowngene	chr1	+	85102520	85110610
CUST_7893_PI419771968		AK015386	0.0104549	21.518	up	NRED	chr11	+	103289593	103290808
CUST_4822_PI419771968	AK081104	uc008rsi	0.00516812	21.5013	up	UCSC_knowngene	chr3	+	150957089	150959605
CUST_7981_PI419771968		AK015643	0.000892	21.4213	up	NRED	chr1	+	186536375	186542868
CUST_3347_PI419771968	AK132681	uc007xaz	0.00177732	21.4138	up	UCSC_knowngene	chr15	-	83187989	83197712
CUST_4490_PI419771968	AK015552	uc008nkw	0.00620027	21.3977	up	UCSC_knowngene	chr2	-	155372776	155382666
CUST_174_PI419771968		AK008051	0.000544	21.3463	up	Fantom_stringent	chr3	+	104024805	104026004
CUST_2141_PI419771968	AK015581	uc007hed	0.000259	21.2574	up	UCSC_knowngene	chr10	+	118762163	118768918
CUST_13391_PI419771968		U72677	0.0125978	21.2493	up	NRED	chr14	+	9181674	9188024
CUST_12727_PI419771968		AK137467	0.00143703	21.2417	up	NRED	chr11	+	98412406	98416287
CUST_8296_PI419771968		AK016877	0.0205007	21.176	up	NRED	chr17	-	87314960	87316600
CUST_11747_PI419771968		AK078013	0.00356462	21.0828	up	NRED	chr18	-	31918149	31920135
CUST_8168_PI419771968		AK016287	0.0196516	21.0797	up	NRED	chr15	-	69064360	69065429
CUST_5747_PI419771968	1700073E17Rik	uc009erm	0.00502357	21.0002	up	UCSC_knowngene	chr6	+	145336116	145350699
CUST_5_PI419771968		AK002941	0.000398	20.9933	up	Fantom_stringent	chr17	+	30713244	30714374
CUST_8161_PI419771968		AK016256	0.00026	20.9803	up	NRED	chr19	-	46763977	46764651
CUST_7004_PI419771968		AK006235	0.000844	20.8736	up	NRED	chr19	+	59420397	59421165
CUST_8789_PI419771968		AK019607	0.0468186	20.6579	up	NRED	chr4	+	82669702	82670144
CUST_11694_PI419771968		AK076971	0.0363951	20.6156	up	NRED	chr15	+	53453214	53454812
CUST_8011_PI419771968		AK015759	0.00735269	20.5449	up	NRED	chr12	+	111149994	111151728
CUST_7813_PI419771968		AK015130	0.00044	20.4759	up	NRED	chr7	-	130112571	130113542
CUST_8090_PI419771968		AK016047	5.67e-05	20.4438	up	NRED	chr1	-	83656124	83908146
CUST_6437_PI419771968	AK014147	uc009pai	0.0351544	20.3769	up	UCSC_knowngene	chr9	+	41184643	41240162
CUST_5609_PI419771968	AK137133	uc009cnu	0.000373	20.3506	up	UCSC_knowngene	chr6	+	83518032	83538117
CUST_8312_PI419771968		AK016944	0.000272	20.3098	up	NRED	chr6	-	56664493	56665726
CUST_1811_PI419771968	AK019628	uc007dat	0.00619257	20.306	up	UCSC_knowngene	chr1	-	156088650	156104036
CUST_11704_PI419771968		AK077193	0.00447054	20.2106	up	NRED	chr2	+	178141974	178143997
CUST_7545_PI419771968		AK013501	0.0110634	20.1863	up	NRED	chr6	-	6809854	6810384
CUST_3836_PI419771968	AK029959	uc008dvr	0.027262	20.1036	up	UCSC_knowngene	chr17	+	89025948	89048036
CUST_5750_PI419771968	AK076842	uc009eta	0.0205764	20.0857	up	UCSC_knowngene	chr6	-	147658504	147667972
CUST_1831_PI419771968	AK076808	uc007diu	0.00137962	20.0172	up	UCSC_knowngene	chr1	+	166891051	166892955
CUST_3369_PI419771968	AK082325	uc007xgz	0.0266578	19.9982	up	UCSC_knowngene	chr15	+	89306666	89315278
CUST_9180_PI419771968		AK020967	3.3e-05	19.9754	up	NRED	chr8	+	24318983	24319834
CUST_10231_PI419771968		AK038433	0.000139	19.826	up	NRED	chr5	+	110877007	110878965
CUST_9434_PI419771968		AK030270	0.00111256	19.784	up	NRED	chr14	+	70128235	70130682
CUST_7059_PI419771968		AK006636	0.00197844	19.7307	up	NRED	chr2	-	119722547	119724141
CUST_8186_PI419771968		AK016367	0.000415	19.6618	up	NRED	chr15	-	92533316	92536386
CUST_4280_PI419771968	AK019812	uc008jqx	0.000264	19.6135	up	UCSC_knowngene	chr2	+	52146521	52170760
CUST_8543_PI419771968		BC039874	0.000441	19.5713	up	NRED	chr7	-	25866550	25867499
CUST_8222_PI419771968		AK016541	0.0131766	19.5069	up	NRED	chr9	+	52878703	52882187
CUST_12528_PI419771968		AK088235	0.00256443	19.4987	up	NRED	chr8	+	12672185	12673497
CUST_8132_PI419771968		AK016152	0.000577	19.4493	up	NRED	chr10	+	96498401	96523693
CUST_6054_PI419771968	AK041042	uc009jvm	0.000906	19.412	up	UCSC_knowngene	chr7	+	134592149	134600699
CUST_394_PI419771968		AK015794	9.86e-05	19.3861	up	Fantom_stringent	chr5	-	115223745	115224605
CUST_1218_PI419771968		AK131677	0.000986	19.3198	up	Fantom_stringent	chr13	+	24853436	24854065
CUST_3268_PI419771968	AK043252	uc007vyl	0.0156634	19.2914	up	UCSC_knowngene	chr15	+	61869541	62090192
CUST_6031_PI419771968	AK016343	uc009jjs	0.00338407	19.288	up	UCSC_knowngene	chr7	+	125387420	125389065
CUST_8051_PI419771968		AK015867	0.00314338	19.2275	up	NRED	chr5	-	26801468	26819829
CUST_4908_PI419771968	Fsd1l	uc008sxd	0.00660923	19.187	up	UCSC_knowngene	chr4	+	53644587	53672550
CUST_3595_PI419771968	AK007854	uc007zzm	0.0112421	19.1787	up	UCSC_knowngene	chr16	-	93343960	93353434
CUST_8046_PI419771968		AK015859	0.0139381	19.1203	up	NRED	chr5	-	136318926	136320816
CUST_2575_PI419771968	AK015219	uc007nko	9.49e-05	19.0955	up	UCSC_knowngene	chr12	-	39279394	39341108
CUST_7878_PI419771968		AK015305	0.0011129	19.0456	up	NRED	chr19	-	58948419	58949628
CUST_9407_PI419771968		AK029749	0.00422154	19.0138	up	NRED	chr18	-	37593065	37597201
CUST_1631_PI419771968	AK003327	uc007apm	0.00149752	18.9621	up	UCSC_knowngene	chr1	+	35936689	35937964
CUST_7450_PI419771968		AK012078	0.0281354	18.9525	up	NRED	chr9	-	118311582	118312420
CUST_8245_PI419771968		AK016684	0.000516	18.8623	up	NRED	chr2	+	146368666	146371844
CUST_7053_PI419771968		AK006616	8.47e-05	18.7445	up	NRED	chr9	+	106794501	106796164
CUST_1220_PI419771968		AK131685	0.00855436	18.7293	up	Fantom_stringent	chr9	+	102595214	102596164
CUST_8339_PI419771968		AK017064	0.000377	18.6993	up	NRED	chr12	+	81038259	81039373
CUST_13458_PI419771968	Pax6os1	NR_002867	0.0120198	18.6417	up	RefSeq_NR	chr2	-	105376236	105510487
CUST_8260_PI419771968		AK016750	0.0324481	18.6088	up	NRED	chr1	-	138499609	138502045
CUST_13365_PI419771968		M24318	0.0342517	18.5121	up	NRED	chr6	-	68860416	69193439
CUST_7788_PI419771968		AK015070	0.00125227	18.4853	up	NRED	chr16	+	78757977	78759229
CUST_7980_PI419771968		AK015639	0.000159	18.3963	up	NRED	chr5	-	130619188	130620545
CUST_309_PI419771968		AK012965	0.0038413	18.3778	up	Fantom_stringent	chr14	+	21460284	21461072
CUST_7892_PI419771968		AK015382	0.00272173	18.3597	up	NRED	chr10	-	13647003	13648770
CUST_6480_PI419771968	AK007116	uc009pqw	0.00999393	18.2859	up	UCSC_knowngene	chr9	+	54113914	54117106
CUST_7888_PI419771968		AK015358	0.000154	18.2729	up	NRED	chr8	+	98394713	98396495
CUST_9301_PI419771968		AK021380	0.0371695	18.2229	up	NRED	chr13	+	55570568	55571759
CUST_6987_PI419771968		AK006109	0.00043	18.1344	up	NRED	chr13	-	35302528	35303917
CUST_11693_PI419771968		AK076950	3.78e-05	18.0899	up	NRED	chr14	-	27447892	27457668
CUST_4059_PI419771968	AK039403	uc008gue	0.00855304	18.0628	up	UCSC_knowngene	chr19	-	12592404	12671056
CUST_10875_PI419771968		AK046275	0.0256251	18.0221	up	NRED	chr18	-	43096529	43100551
CUST_917_PI419771968		AK077182	0.000607	18.0112	up	Fantom_stringent	chr12	-	36938869	36944805
CUST_12851_PI419771968		AK145513	0.0271081	17.8933	up	NRED	chr18	+	18987738	18990627
CUST_2018_PI419771968	AK076771	uc007fov	0.000175	17.8309	up	UCSC_knowngene	chr10	+	70844496	70895928
CUST_7856_PI419771968		AK015246	0.0079372	17.7944	up	NRED	chr9	-	107255619	107256317
CUST_6398_PI419771968	AK019729	uc009ogf	0.00844907	17.7714	up	UCSC_knowngene	chr9	+	15424300	15445664
CUST_2629_PI419771968	AK145430	uc007obl	0.0113213	17.7692	up	UCSC_knowngene	chr12	-	82043659	82046383
CUST_219_PI419771968		AK009418	0.000777	17.759	up	Fantom_stringent	chr13	-	99846482	99857876
CUST_8224_PI419771968		AK016552	0.036497	17.7379	up	NRED	chr7	+	140195908	140198507
CUST_7850_PI419771968		AK015234	0.00389216	17.6966	up	NRED	chr4	+	133466706	133467356
CUST_6461_PI419771968	Dscaml1	uc009pfx	0.0115513	17.6066	up	UCSC_knowngene	chr9	+	45234710	45361372
CUST_8080_PI419771968		AK016019	0.0133466	17.5553	up	NRED	chr16	+	38017408	38054612
CUST_785_PI419771968		AK046905	0.000291	17.5511	up	Fantom_stringent	chr5	+	92511986	92513191
CUST_2518_PI419771968	AK079017	uc007mwe	0.0120285	17.5482	up	UCSC_knowngene	chr11	+	121664420	121671633
CUST_11145_PI419771968		AK048826	0.00619163	17.5143	up	NRED	chr4	+	126645375	126646623
CUST_6312_PI419771968	AK080070	uc009nic	0.00219291	17.4865	up	UCSC_knowngene	chr8	-	111077152	111108495
CUST_4380_PI419771968	BC048594	uc008lli	0.0159727	17.4484	up	UCSC_knowngene	chr2	+	105843492	105880783
CUST_8013_PI419771968		AK015765	0.00441984	17.3844	up	NRED	chr13	+	27384484	27397901
CUST_9424_PI419771968		AK030081	0.0374933	17.3053	up	NRED	chr1	+	37990440	38010981
CUST_185_PI419771968		AK008257	8.52e-05	17.2028	up	Fantom_stringent	chr4	+	154783298	154790096
CUST_11672_PI419771968		AK076537	5.06e-05	17.1468	up	NRED	chr9	+	108469863	108471500
CUST_9416_PI419771968		AK029924	0.00863267	17.0905	up	NRED	chr8	-	9129422	9132291
CUST_7979_PI419771968		AK015638	0.0164925	17.066	up	NRED	chr1	-	62837491	62841306
CUST_1690_PI419771968	AK013046	uc007bgw	0.00087	16.9186	up	UCSC_knowngene	chr1	-	64726444	64737233
CUST_8184_PI419771968		AK016360	0.00101964	16.8162	up	NRED	chr1	-	61663516	61667723
CUST_2847_PI419771968	AK076976	uc007qzr	0.00197689	16.8054	up	UCSC_knowngene	chr13	-	66604095	66620459
CUST_2889_PI419771968	AK087351	uc007rjm	0.00456919	16.7964	up	UCSC_knowngene	chr13	+	89879064	90026771
CUST_1250_PI419771968		AK134149	0.000503	16.7957	up	Fantom_stringent	chr15	+	98723783	98725606
CUST_4137_PI419771968	AK040197	uc008hrl	0.000491	16.7913	up	UCSC_knowngene	chr19	+	45824113	45826797
CUST_6955_PI419771968		AK005910	0.00977229	16.7902	up	NRED	chr7	-	129282521	129302915
CUST_5803_PI419771968	AK076965	uc009fxc	0.0021072	16.7118	up	UCSC_knowngene	chr7	+	28554249	28556809
CUST_5227_PI419771968	AK079034	uc008xkk	0.0133242	16.6756	up	UCSC_knowngene	chr5	+	52581919	52637135
CUST_5200_PI419771968	AK016496	uc008xdw	0.0101322	16.6653	up	UCSC_knowngene	chr5	-	35923875	35931412
CUST_7215_PI419771968		AK007362	0.00614102	16.6609	up	NRED	chr16	+	13729928	13739564
CUST_8190_PI419771968		AK016382	0.00501808	16.6553	up	NRED	chr1	-	142466752	142552979
CUST_12978_PI419771968		AK164224	0.00440217	16.6364	up	NRED	chr3	-	89781186	89820215
CUST_496_PI419771968		AK019784	0.00787242	16.615	up	Fantom_stringent	chr3	+	82680667	82745031
CUST_9254_PI419771968		AK021219	0.0201565	16.6129	up	NRED	chr7	-	148023119	148031588
CUST_2986_PI419771968	AK005833	uc007srf	0.00024	16.5785	up	UCSC_knowngene	chr14	-	25425925	25436533
CUST_8318_PI419771968		AK016987	0.00331846	16.5697	up	NRED	chr8	+	37239194	37241477
CUST_8783_PI419771968		AK019584	0.00210368	16.556	up	NRED	chr12	+	111474701	111476844
CUST_12675_PI419771968		AK133367	0.00968986	16.5384	up	NRED	chr5	+	97821465	98017144
CUST_8076_PI419771968		AK016003	0.00739402	16.5262	up	NRED	chr3	-	13597138	13652865
CUST_7081_PI419771968		AK006719	0.0346077	16.4999	up	NRED	chr1	-	10047105	10048025
CUST_8108_PI419771968		AK016106	0.00251935	16.4496	up	NRED	chr10	-	8580661	8581241
CUST_3412_PI419771968	AK043982	uc007xwu	0.00183732	16.4196	up	UCSC_knowngene	chr15	+	102627925	102649975
CUST_8039_PI419771968		AK015845	0.000478	16.318	up	NRED	chr3	+	142693577	142703714
CUST_5495_PI419771968	AK133155	uc009bhe	0.000273	16.2445	up	UCSC_knowngene	chr6	-	34369395	34395435
CUST_12328_PI419771968		AK085521	0.000594	16.2237	up	NRED	chr10	-	39743658	39745001
CUST_564_PI419771968		AK030036	9.58e-05	16.2199	up	Fantom_stringent	chr2	-	129624104	129627195
CUST_7824_PI419771968		AK015152	9.62e-05	16.1851	up	NRED	chr5	+	123728136	123729594
CUST_4136_PI419771968	AK052812	uc008hrb	0.00444296	16.1366	up	UCSC_knowngene	chr19	+	45619240	45620834
CUST_12672_PI419771968		AK133305	0.00742724	16.1186	up	NRED	chr4	-	39345077	39397282
CUST_8029_PI419771968		AK015816	0.0065149	16.1159	up	NRED	chr17	+	4634979	4637471
CUST_7116_PI419771968		AK006860	0.0345301	16.1109	up	NRED	chr14	-	16833311	16869785
CUST_2093_PI419771968	Metap2	uc007gvf	0.0240415	16.0473	up	UCSC_knowngene	chr10	-	93352785	93359838
CUST_566_PI419771968		AK030072	0.0189323	16.0408	up	Fantom_stringent	chr12	-	39279409	39341108
CUST_8359_PI419771968		AK017135	0.00301539	16.0344	up	NRED	chr13	-	91920503	91921960
CUST_10883_PI419771968		AK046472	0.0185706	15.9365	up	NRED	chr4	-	154238615	154242188
CUST_8229_PI419771968		AK016587	0.000864	15.8856	up	NRED	chr17	+	89719566	89726673
CUST_8324_PI419771968		AK017004	0.0116465	15.8474	up	NRED	chr6	-	72070206	72073191
CUST_8015_PI419771968		AK015774	0.0244043	15.8441	up	NRED	chr6	-	89219510	89223201
CUST_3500_PI419771968	AK086460	uc007zey	0.00155121	15.8162	up	UCSC_knowngene	chr16	+	38452061	38453573
CUST_5967_PI419771968	AK132765	uc009iiu	0.0228166	15.8112	up	UCSC_knowngene	chr7	-	104055335	104095544
CUST_3491_PI419771968	AK160141	uc007zaa	1.55e-05	15.8072	up	UCSC_knowngene	chr16	-	33379940	33380813
CUST_7740_PI419771968		AK014816	0.00163333	15.7056	up	NRED	chr4	-	129137417	129138768
CUST_3540_PI419771968	St3gal6	uc007znw	0.0127083	15.7011	up	UCSC_knowngene	chr16	-	58502973	58523871
CUST_7938_PI419771968		AK015521	0.00249669	15.6731	up	NRED	chr17	-	74974720	75016459
CUST_719_PI419771968		AK042171	0.00171178	15.6528	up	Fantom_stringent	chr10	+	7383179	7384421
CUST_12028_PI419771968		AK082127	0.00421705	15.581	up	NRED	chr17	+	81127469	81128808
CUST_1823_PI419771968	AK015528	uc007dfk	0.0255936	15.5127	up	UCSC_knowngene	chr1	-	163084688	163089445
CUST_8093_PI419771968		AK016051	0.0164037	15.5004	up	NRED	chr4	+	127938287	127940234
CUST_12938_PI419771968		AK161332	0.00187238	15.4236	up	NRED	chr7	-	130112571	130113564
CUST_3770_PI419771968	Unc5cl	uc008cyc	0.00790588	15.4166	up	UCSC_knowngene	chr17	+	48601500	48679039
CUST_6242_PI419771968	AK157878	uc009mlj	0.00135618	15.4078	up	UCSC_knowngene	chr8	-	86456227	86479104
CUST_4903_PI419771968	AK012547	uc008swi	0.000633	15.3609	up	UCSC_knowngene	chr4	-	52443166	52451671
CUST_7916_PI419771968		AK015451	0.00234737	15.3442	up	NRED	chrX	-	20783706	20798791
CUST_123_PI419771968		AK006620	0.000773	15.3134	up	Fantom_stringent	chr13	-	75837609	75844620
CUST_8355_PI419771968		AK017123	0.0243238	15.3048	up	NRED	chr5	+	135395659	135396508
CUST_12945_PI419771968		AK161715	0.000859	15.2387	up	NRED	chr10	+	42580461	42583123
CUST_8151_PI419771968		AK016233	0.00626796	15.2033	up	NRED	chr8	+	128046392	128059624
CUST_7749_PI419771968		AK014867	0.0103305	15.1797	up	NRED	chr1	+	16921050	16921877
CUST_1111_PI419771968		AK085506	8.43e-05	15.1748	up	Fantom_stringent	chr5	+	137395015	137412976
CUST_7189_PI419771968		AK007196	0.00324125	15.128	up	NRED	chr1	+	20704357	20704824
CUST_167_PI419771968		AK007778	0.00109797	15.1159	up	Fantom_stringent	chr16	+	93368483	93369274
CUST_4994_PI419771968	AK131819	uc008uhc	0.00210595	15.1044	up	UCSC_knowngene	chr4	-	116357574	116358627
CUST_8073_PI419771968		AK015983	0.0042843	15.1008	up	NRED	chr8	+	89982342	89983334
CUST_4485_PI419771968	8430427H17Rik	uc008nhw	0.00518179	15.0455	up	UCSC_knowngene	chr2	-	153285481	153318253
CUST_1869_PI419771968	AK133142	uc007dxm	0.000825	15.0259	up	UCSC_knowngene	chr1	+	183743588	183745905
CUST_13231_PI419771968		BC048919	5.85e-05	15.007	up	NRED	chr9	-	77214218	77247123
CUST_8195_PI419771968		AK016402	0.0012842	14.9883	up	NRED	chr11	+	44399818	44404731
CUST_9159_PI419771968		AK020896	0.000574	14.9784	up	NRED	chr15	+	86927961	87084451
CUST_2579_PI419771968	AK004585	uc007nkz	0.000157	14.9589	up	UCSC_knowngene	chr12	+	40949344	40951825
CUST_3245_PI419771968	BC048765	uc007vop	0.00766833	14.9375	up	UCSC_knowngene	chr15	+	39994152	39999619
CUST_13278_PI419771968		BC059101	0.00851841	14.8676	up	NRED	chr1	-	155746444	155746708
CUST_3189_PI419771968	AK038711	uc007uzp	0.00147944	14.8395	up	UCSC_knowngene	chr14	-	120489164	120594674
CUST_8272_PI419771968		AK016806	0.00212854	14.8099	up	NRED	chr8	-	11726064	11727375
CUST_716_PI419771968		AK041974	0.000583	14.8097	up	Fantom_stringent	chr5	+	38285010	38289156
CUST_5902_PI419771968	AK078191	uc009hfa	0.00221371	14.6852	up	UCSC_knowngene	chr7	-	68849404	69072460
CUST_8819_PI419771968		AK019705	0.00271934	14.6831	up	NRED	chr1	-	180518781	180519015
CUST_647_PI419771968		AK036265	0.000966	14.6451	up	Fantom_stringent	chr16	-	31427963	31429862
CUST_13258_PI419771968		BC052793	0.000567	14.6069	up	NRED	chr16	-	33379939	33380761
CUST_8036_PI419771968		AK015836	0.0409214	14.5707	up	NRED	chr12	+	12909525	12914184
CUST_6981_PI419771968		AK006066	0.0263104	14.5564	up	NRED	chr18	+	80826185	80827538
CUST_3686_PI419771968	AK076892	uc008bbh	0.00564529	14.5436	up	UCSC_knowngene	chr17	-	25835049	25835794
CUST_3399_PI419771968	AK016307	uc007xol	2.84e-05	14.5294	up	UCSC_knowngene	chr15	+	98816395	98819712
CUST_5707_PI419771968	AK033854	uc009ecs	0.000241	14.4716	up	UCSC_knowngene	chr6	-	128119721	128133821
CUST_8060_PI419771968		AK015909	0.0101773	14.3677	up	NRED	chr2	+	105316657	105317513
CUST_7163_PI419771968		AK007090	0.00339317	14.3397	up	NRED	chr15	+	3929146	3929825
CUST_8160_PI419771968		AK016253	0.00342928	14.2876	up	NRED	chr5	+	124679733	124687146
CUST_13471_PI419771968	E130201H02Rik	NR_024324	0.00324545	14.2493	up	RefSeq_NR	chr7	+	127741138	127741989
CUST_7784_PI419771968		AK015054	0.0155261	14.2243	up	NRED	chr2	+	121604351	121605157
CUST_4431_PI419771968	AK157218	uc008mgp	0.00269564	14.2074	up	UCSC_knowngene	chr2	-	128142035	128255085
CUST_13668_PI419771968	Gm15698	NR_003564	0.0426103	14.1944	up	RefSeq_NR	chr11	-	88825980	88828231
CUST_5855_PI419771968	1700021P22Rik	uc009gps	7.29e-05	14.1219	up	UCSC_knowngene	chr7	+	51752015	51752514
CUST_7073_PI419771968		AK006689	0.0263349	14.0543	up	NRED	chr10	+	51386794	51395637
CUST_4656_PI419771968	AK039238	uc008pkk	0.00294584	14.0439	up	UCSC_knowngene	chr3	-	64936981	65106607
CUST_12438_PI419771968		AK086739	0.00127466	14.025	up	NRED	chr14	+	99921763	99976121
CUST_8289_PI419771968		AK016862	0.00524836	14.0157	up	NRED	chr9	-	114275615	114277348
CUST_2980_PI419771968	AK012226	uc007sly	0.00340893	13.9755	up	UCSC_knowngene	chr14	+	23403627	23418490
CUST_11675_PI419771968		AK076564	0.00127542	13.9576	up	NRED	chr14	+	13207098	13217243
CUST_3250_PI419771968	AK010129	uc007vqk	0.00657459	13.9109	up	UCSC_knowngene	chr15	+	44619329	44637373
CUST_1477_PI419771968		AK157435	0.00110727	13.9047	up	Fantom_stringent	chr7	+	97177669	97197579
CUST_5151_PI419771968	AK029857	uc008wpr	0.000952	13.8934	up	UCSC_knowngene	chr5	+	22056254	22063986
CUST_5690_PI419771968	DQ715729	uc009dqv	0.00108364	13.8931	up	UCSC_knowngene	chr6	+	124365248	124368063
CUST_8773_PI419771968		AK019555	0.000513	13.8802	up	NRED	chr13	-	102161825	102167535
CUST_5833_PI419771968	AK133438	uc009gih	0.00851113	13.8658	up	UCSC_knowngene	chr7	+	31947376	31955660
CUST_3459_PI419771968	AK020919	uc007ype	0.0221943	13.7857	up	UCSC_knowngene	chr16	-	19876777	19884313
CUST_7227_PI419771968		AK007900	0.0160582	13.7385	up	NRED	chr19	+	5561051	5561679
CUST_3597_PI419771968	AK019036	uc007zzo	0.00281576	13.7198	up	UCSC_knowngene	chr16	-	93344988	93354316
CUST_10895_PI419771968		AK046601	0.00850833	13.6816	up	NRED	chr11	+	64975633	64977568
CUST_10437_PI419771968		AK040987	0.0479	13.6607	up	NRED	chr4	-	44537628	44539061
CUST_5641_PI419771968	AK007770	uc009cya	0.00909833	13.6225	up	UCSC_knowngene	chr6	+	91390980	91391748
CUST_10891_PI419771968		AK046572	0.0107243	13.6046	up	NRED	chr3	-	60649614	60654247
CUST_8053_PI419771968		AK015880	0.0148252	13.5993	up	NRED	chr6	-	19197898	19228843
CUST_8185_PI419771968		AK016366	0.0208465	13.5887	up	NRED	chr7	+	127813809	127819416
CUST_6160_PI419771968	AK133017	uc009lgd	0.0357308	13.5581	up	UCSC_knowngene	chr8	-	26659144	26666555
CUST_6939_PI419771968		AK005783	0.0372955	13.4991	up	NRED	chr2	-	118484555	118485806
CUST_6018_PI419771968	AK038880	uc009jgv	0.00248672	13.4929	up	UCSC_knowngene	chr7	-	119670485	119679197
CUST_8711_PI419771968		AK018848	0.000635	13.4724	up	NRED	chr9	-	59508190	59508967
CUST_10439_PI419771968		AK041002	0.00155246	13.4538	up	NRED	chr18	-	67560675	67562662
CUST_8028_PI419771968		AK015815	0.00636208	13.4118	up	NRED	chr4	+	44682201	44683769
CUST_4372_PI419771968	AK015665	uc008ljw	0.00272499	13.3872	up	UCSC_knowngene	chr2	+	104399340	104411586
CUST_838_PI419771968		AK050462	0.00142322	13.3453	up	Fantom_stringent	chr18	+	21144121	21145755
CUST_2082_PI419771968	AK036535	uc007gst	0.000763	13.3431	up	UCSC_knowngene	chr10	-	89199517	89203938
CUST_7185_PI419771968		AK007179	0.0234583	13.1709	up	NRED	chr7	-	74364268	74367142
CUST_5485_PI419771968	AK007083	uc009bfb	0.000966	13.1629	up	UCSC_knowngene	chr6	+	30254604	30257766
CUST_7205_PI419771968		AK007275	0.0116062	13.1597	up	NRED	chr13	-	113590586	113590937
CUST_8927_PI419771968		AK020166	0.00152184	13.1576	up	NRED	chr12	-	77503737	77504969
CUST_10406_PI419771968		AK040512	0.0251425	13.1233	up	NRED	chr1	+	167802183	167805411
CUST_4084_PI419771968	AK086006	uc008hbv	0.00215423	13.1135	up	UCSC_knowngene	chr19	-	27335224	27336813
CUST_7939_PI419771968		AK015531	0.0033254	13.1042	up	NRED	chr1	+	37717566	37719492
CUST_6915_PI419771968		AK005575	0.0104066	13.0833	up	NRED	chr17	+	33822489	33822731
CUST_7203_PI419771968		AK007252	0.0106602	13.0786	up	NRED	chr7	-	133369010	133381118
CUST_8322_PI419771968		AK016999	0.00202362	13.0178	up	NRED	chr11	+	24381908	24469952
CUST_7932_PI419771968		AK015503	0.00903438	13.0115	up	NRED	chr19	-	12276848	12310323
CUST_9569_PI419771968		AK031914	0.00213031	12.9586	up	NRED	chr15	-	72920095	72921088
CUST_13293_PI419771968		BC067070	0.00722919	12.9299	up	NRED	chr10	-	94136456	94151303
CUST_12676_PI419771968		AK133430	0.0123878	12.8418	up	NRED	chr15	+	73476303	73478032
CUST_13415_PI419771968		X99253	0.00190555	12.8355	up	NRED	chr11	+	106364755	106408008
CUST_8627_PI419771968		AK018281	0.00991583	12.8254	up	NRED	chr8	-	50823833	50825250
CUST_7151_PI419771968		AK007008	0.0126794	12.8177	up	NRED	chr4	-	141811577	141811991
CUST_6083_PI419771968	AK029726	uc009kfx	0.00530448	12.7774	up	UCSC_knowngene	chr7	-	146824787	146869716
CUST_3121_PI419771968	AK028094	uc007ujf	0.00891605	12.7618	up	UCSC_knowngene	chr14	+	65945167	65956441
CUST_12427_PI419771968		AK086609	0.0140532	12.7577	up	NRED	chr10	-	102526323	102528527
CUST_2210_PI419771968	AK087392	uc007ief	0.0287175	12.7248	up	UCSC_knowngene	chr11	+	22517410	22518490
CUST_9796_PI419771968		AK034331	0.00377547	12.6384	up	NRED	chr13	+	21532339	21537803
CUST_11910_PI419771968		AK080622	0.000173	12.6203	up	NRED	chr2	+	90910220	90911779
CUST_2080_PI419771968	AK085365	uc007gsq	0.0120087	12.6121	up	UCSC_knowngene	chr10	+	89149115	89152108
CUST_6229_PI419771968	AK017010	uc009mhs	0.00374902	12.4984	up	UCSC_knowngene	chr8	+	80134758	80210469
CUST_8816_PI419771968		AK019692	0.0086614	12.4857	up	NRED	chr8	+	73034384	73036499
CUST_5399_PI419771968	AK006961	uc008zrv	0.00614658	12.4769	up	UCSC_knowngene	chr5	+	127187305	127192191
CUST_8155_PI419771968		AK016240	0.00472123	12.4696	up	NRED	chr8	+	128108558	128115009
CUST_13671_PI419771968	1700008J07Rik	NR_024331	0.00435147	12.4615	up	RefSeq_NR	chr7	-	134653951	134656383
CUST_9161_PI419771968		AK020901	0.00268892	12.4589	up	NRED	chr3	+	58501482	58502590
CUST_8188_PI419771968		AK016379	0.0398103	12.458	up	NRED	chr9	+	77205159	77205707
CUST_6999_PI419771968		AK006204	0.00240778	12.4314	up	NRED	chr10	+	125692172	125694274
CUST_7611_PI419771968		AK013802	0.00166466	12.3931	up	NRED	chr10	-	39377233	39378232
CUST_5051_PI419771968	AK006510	uc008vgs	0.00225518	12.3567	up	UCSC_knowngene	chr4	+	135182685	135185353
CUST_2641_PI419771968	AK144886	uc007ohq	0.0259572	12.2919	up	UCSC_knowngene	chr12	+	87510290	87534552
CUST_2005_PI419771968	AK079018	uc007flp	0.000877	12.2847	up	UCSC_knowngene	chr10	+	66467822	66504074
CUST_3454_PI419771968	AK161480	uc007ymw	0.0103777	12.2446	up	UCSC_knowngene	chr16	-	18207914	18213626
CUST_7011_PI419771968		AK006277	0.0170558	12.1841	up	NRED	chr1	+	188750811	188753991
CUST_6177_PI419771968	AK080223	uc009lmi	0.0187306	12.1793	up	UCSC_knowngene	chr8	+	40383333	40453622
CUST_7069_PI419771968		AK006675	0.00231995	12.1378	up	NRED	chr4	+	133228633	133229152
CUST_7907_PI419771968		AK015425	0.00302744	12.1229	up	NRED	chr19	-	46440635	46442305
CUST_1948_PI419771968	AK019688	uc007epv	0.0292952	12.1153	up	UCSC_knowngene	chr10	-	23331068	23341954
CUST_4494_PI419771968	AK163252	uc008nlv	0.0173051	12.1118	up	UCSC_knowngene	chr2	-	155799014	155833659
CUST_10741_PI419771968		AK044604	0.0149636	12.1073	up	NRED	chr10	+	62801950	62803661
CUST_5511_PI419771968	AK016417	uc009blh	0.00471572	12.0981	up	UCSC_knowngene	chr6	+	39068471	39098311
CUST_2118_PI419771968	AK076938	uc007gzq	0.00802952	12.0519	up	UCSC_knowngene	chr10	-	110238229	110333606
CUST_1346_PI419771968		AK144519	0.00149525	12.043	up	Fantom_stringent	chr17	+	25150630	25151732
CUST_11844_PI419771968		AK079625	0.0464689	12.0342	up	NRED	chr6	-	134183175	134193729
CUST_4884_PI419771968	DQ687153	uc008skp	0.00113775	12.0331	up	UCSC_knowngene	chr4	+	41763413	41763784
CUST_12394_PI419771968		AK086314	0.00793812	12.0284	up	NRED	chr3	-	89818289	89824512
CUST_9339_PI419771968		AK028736	0.026944	12.0252	up	NRED	chr9	+	78566093	78568812
CUST_10796_PI419771968		AK045234	0.0223948	12.0117	up	NRED	chr11	-	61716500	61719657
CUST_6490_PI419771968	AK012238	uc009ptw	0.000358	11.9882	up	UCSC_knowngene	chr9	-	56923022	56923820
CUST_3956_PI419771968	BC048666	uc008fec	0.00439422	11.9576	up	UCSC_knowngene	chr18	-	64317377	64436834
CUST_5960_PI419771968	AK046045	uc009igl	0.00609665	11.9505	up	UCSC_knowngene	chr7	+	97177668	97197579
CUST_5056_PI419771968	Eif4g3	uc008vjw	0.00141953	11.9166	up	UCSC_knowngene	chr4	+	137549384	137613992
CUST_8246_PI419771968		AK016692	0.0130019	11.9057	up	NRED	chr11	+	18965277	18975743
CUST_7840_PI419771968		AK015206	0.0436916	11.8763	up	NRED	chr12	-	77503743	77504641
CUST_3014_PI419771968	AK047145	uc007tcs	0.00168258	11.8377	up	UCSC_knowngene	chr14	+	43062142	43098787
CUST_8078_PI419771968		AK016008	0.00301476	11.8085	up	NRED	chr9	-	100073419	100074565
CUST_7199_PI419771968		AK007232	0.0435734	11.758	up	NRED	chrX	+	102012114	102037794
CUST_5281_PI419771968	AK019057	uc008ybr	0.0483493	11.7335	up	UCSC_knowngene	chr5	-	91480896	91503799
CUST_8253_PI419771968		AK016725	0.00285726	11.7313	up	NRED	chr9	-	59527184	59528620
CUST_7887_PI419771968		AK015353	0.0115573	11.7077	up	NRED	chr9	+	106543258	106545895
CUST_1237_PI419771968		AK133189	0.0134574	11.6772	up	Fantom_stringent	chr11	-	78112201	78115004
CUST_1722_PI419771968	AK016730	uc007bup	0.00529227	11.6716	up	UCSC_knowngene	chr1	+	87825057	87828329
CUST_5884_PI419771968	AK158295	uc009hbb	0.000486	11.6637	up	UCSC_knowngene	chr7	+	56136669	56141978
CUST_2596_PI419771968	AK179786	uc007nsi	0.0119816	11.6468	up	UCSC_knowngene	chr12	-	70472135	70473446
CUST_4337_PI419771968	AK019679	uc008kjs	0.00128446	11.6467	up	UCSC_knowngene	chr2	-	84870377	84873351
CUST_3693_PI419771968	AK006250	uc008bdb	0.00184444	11.5934	up	UCSC_knowngene	chr17	+	26122759	26125414
CUST_7921_PI419771968		AK015461	0.0189877	11.52	up	NRED	chr18	-	32823295	32996941
CUST_3008_PI419771968	AK019667	uc007taa	0.0150099	11.462	up	UCSC_knowngene	chr14	-	34622951	34624469
CUST_8306_PI419771968		AK016922	0.00468199	11.4322	up	NRED	chr3	+	85691612	85693156
CUST_9826_PI419771968		AK034626	0.00106231	11.4249	up	NRED	chr17	-	80771196	80772882
CUST_3445_PI419771968	AK131759	uc007ygb	0.000272	11.4107	up	UCSC_knowngene	chr16	-	13463728	13468848
CUST_7831_PI419771968		AK015180	0.0283625	11.3828	up	NRED	chr10	-	115239471	115306578
CUST_7084_PI419771968		AK006722	0.000617	11.3406	up	NRED	chr7	+	137541842	137542144
CUST_4710_PI419771968	AK006651	uc008qgc	0.000349	11.3311	up	UCSC_knowngene	chr3	-	94213316	94216834
CUST_7758_PI419771968		AK014902	0.00497412	11.3189	up	NRED	chr12	-	56698205	56700174
CUST_6732_PI419771968	AK163488	uc009tih	0.00193268	11.2909	up	UCSC_knowngene	chrX	+	58369560	58392635
CUST_8833_PI419771968		AK019754	0.0113142	11.2814	up	NRED	chr2	-	30652772	30659143
CUST_12948_PI419771968		AK162444	0.000565	11.2008	up	NRED	chr7	+	56214485	56223206
CUST_8117_PI419771968		AK016119	8.88e-06	11.1865	up	NRED	chr11	-	13972105	14079044
CUST_8162_PI419771968		AK016261	0.0125323	11.1672	up	NRED	chr15	-	30526848	30556376
CUST_4413_PI419771968	Catsper2(AK142380)	uc008lyy	0.00105045	11.0878	up	UCSC_knowngene	chr2	-	121218366	121235942
CUST_9406_PI419771968		AK029748	0.0251422	11.0665	up	NRED	chr15	+	101676259	101679392
CUST_4745_PI419771968	AK052792	uc008qtn	0.0294021	11.0641	up	UCSC_knowngene	chr3	+	103607051	103612361
CUST_7790_PI419771968		AK015084	0.00877956	11.0543	up	NRED	chr12	-	5933833	5950438
CUST_7768_PI419771968		AK014962	0.00860162	11.0212	up	NRED	chr7	+	132635068	132636572
CUST_8335_PI419771968		AK017047	0.00059	11.008	up	NRED	chr13	+	50232437	50242039
CUST_13166_PI419771968		BC030033	5.76e-05	11.0056	up	NRED	chr16	-	58502973	58508011
CUST_1229_PI419771968		AK132559	0.00074	11.0017	up	Fantom_stringent	chr4	-	136714997	136720981
CUST_4609_PI419771968	AK046440	uc008oue	0.0113613	10.9734	up	UCSC_knowngene	chr3	-	28701725	28704258
CUST_13261_PI419771968		BC054063	0.0100964	10.9713	up	NRED	chr2	+	26448607	26459731
CUST_7810_PI419771968		AK015127	0.00328001	10.952	up	NRED	chr5	+	119402347	119411270
CUST_4073_PI419771968	AK089615	uc008gyv	0.00154631	10.9081	up	UCSC_knowngene	chr19	-	21236971	21322939
CUST_1708_PI419771968	AK039780	uc007boy	0.00487229	10.9008	up	UCSC_knowngene	chr1	-	75364786	75371587
CUST_7166_PI419771968		AK007104	0.00930949	10.8904	up	NRED	chr2	-	112105326	112105978
CUST_8315_PI419771968		AK016970	0.00653343	10.8904	up	NRED	chr15	-	43531085	43532581
CUST_3206_PI419771968	AK040806	uc007vcq	0.00983229	10.8768	up	UCSC_knowngene	chr15	-	4997354	5007115
CUST_7743_PI419771968		AK014830	0.00252321	10.8272	up	NRED	chr2	-	91102473	91105420
CUST_13031_PI419771968		AK219183	0.00668446	10.82	up	NRED	chr1	+	193922736	193923016
CUST_4899_PI419771968	Gm568	uc008suh	0.0365332	10.8048	up	UCSC_knowngene	chr4	-	47021188	47023653
CUST_1857_PI419771968	AK158658	uc007dua	0.0186131	10.8047	up	UCSC_knowngene	chr1	-	178360241	178457400
CUST_327_PI419771968		AK013313	0.0150433	10.8038	up	Fantom_stringent	chr1	-	174305102	174306494
CUST_5365_PI419771968	AB041800	uc008zeh	0.00817394	10.7999	up	UCSC_knowngene	chr5	-	116081060	116081824
CUST_8708_PI419771968		AK018780	0.00059	10.7814	up	NRED	chr19	-	4256954	4257679
CUST_10900_PI419771968		AK046652	0.00314439	10.7774	up	NRED	chr14	+	70688985	70701091
CUST_6565_PI419771968	AK040733	uc009qzd	0.00026	10.7554	up	UCSC_knowngene	chr9	-	88736635	88753639
CUST_6970_PI419771968		AK006003	0.034594	10.7458	up	NRED	chr6	-	113581642	113583138
CUST_13345_PI419771968		K03466	0.021312	10.7256	up	NRED	chr1	-	75216000	75216368
CUST_2204_PI419771968	AK013680	uc007ici	0.000926	10.7239	up	UCSC_knowngene	chr11	+	17853972	17859581
CUST_2521_PI419771968	1700012B15Rik	uc007mwk	0.00369286	10.7137	up	UCSC_knowngene	chr12	+	3236610	3249997
CUST_5530_PI419771968	TCR-beta chain	uc009bpq	0.00185987	10.702	up	UCSC_knowngene	chr6	+	41492753	41498351
CUST_8110_PI419771968		AK016108	0.00951612	10.6852	up	NRED	chr4	-	88513137	88514284
CUST_7096_PI419771968		AK006784	0.0057015	10.6691	up	NRED	chr2	-	31531885	31543989
CUST_2367_PI419771968	AK076774	uc007ktf	0.0285984	10.6641	up	UCSC_knowngene	chr11	-	86887758	86888460
CUST_7195_PI419771968		AK007217	0.000195	10.6522	up	NRED	chr4	-	14146642	14164597
CUST_2747_PI419771968	AK038391	uc007psy	0.0255201	10.5699	up	UCSC_knowngene	chr13	+	22864524	22886697
CUST_4444_PI419771968	AK161431	uc008mms	0.016799	10.543	up	UCSC_knowngene	chr2	+	132316451	132339638
CUST_7015_PI419771968		AK006299	0.0216373	10.5361	up	NRED	chr14	+	47621014	47623032
CUST_6353_PI419771968	AK016841	uc009nur	0.0105742	10.5264	up	UCSC_knowngene	chr8	+	125758990	125766259
CUST_8070_PI419771968		AK015975	0.0377674	10.511	up	NRED	chr11	-	68396765	68400459
CUST_8083_PI419771968		AK016029	0.00868092	10.4965	up	NRED	chr15	+	86568255	86596570
CUST_12691_PI419771968		AK134561	0.0130876	10.452	up	NRED	chr16	+	11178268	11192385
CUST_114_PI419771968		AK006267	0.000601	10.4358	up	Fantom_stringent	chr19	-	8831052	8831510
CUST_4652_PI419771968	AK016388	uc008pib	0.0223955	10.4251	up	UCSC_knowngene	chr3	+	58496493	58592467
CUST_13533_PI419771968	Zfp389	NR_026798	0.00176309	10.4154	up	RefSeq_NR	chr13	-	21596184	21598393
CUST_7149_PI419771968		AK007004	0.00359146	10.4064	up	NRED	chr12	-	84033506	84040142
CUST_8069_PI419771968		AK015974	0.00935309	10.3701	up	NRED	chr5	-	100376332	100377245
CUST_3923_PI419771968	AK041437	uc008evn	0.0151849	10.3401	up	UCSC_knowngene	chr18	-	46517525	46586697
CUST_9396_PI419771968		AK029583	0.00564865	10.3199	up	NRED	chr6	+	119520960	119528075
CUST_7382_PI419771968		AK010838	0.00304621	10.3181	up	NRED	chr2	+	29904481	29904898
CUST_10739_PI419771968		AK044580	0.014926	10.3075	up	NRED	chr17	+	15511979	15516439
CUST_7040_PI419771968		AK006506	0.00827092	10.2897	up	NRED	chr11	+	70468664	70469141
CUST_8128_PI419771968		AK016143	0.00217604	10.2422	up	NRED	chr4	+	30591745	30782894
CUST_8348_PI419771968		AK017083	0.00516302	10.1938	up	NRED	chr3	-	57945628	57967729
CUST_7014_PI419771968		AK006298	0.00561222	10.1888	up	NRED	chr9	-	118833941	118834499
CUST_6243_PI419771968	AK008705	uc009mlp	1.66e-05	10.187	up	UCSC_knowngene	chr8	-	86534128	86535341
CUST_11297_PI419771968		AK051225	0.000109	10.1749	up	NRED	chr14	+	105038340	105040589
CUST_5068_PI419771968	AK019631	uc008vpq	0.0020262	10.1047	up	UCSC_knowngene	chr4	+	141574006	141584749
CUST_7950_PI419771968		AK015569	0.00024	10.0789	up	NRED	chr6	+	135629677	135634568
CUST_10388_PI419771968		AK040358	0.00199497	10.0686	up	NRED	chr4	+	33334944	33336061
CUST_9432_PI419771968		AK030193	0.00552215	10.0263	up	NRED	chr5	+	38374929	38377309
CUST_3615_PI419771968	AK015782	uc008aet	0.00146728	9.96522	up	UCSC_knowngene	chr17	+	3557823	3559862
CUST_7171_PI419771968		AK007120	0.0102011	9.94413	up	NRED	chr12	+	55334601	55343307
CUST_7973_PI419771968		AK015623	0.0118008	9.94352	up	NRED	chr10	+	92544041	92544641
CUST_4886_PI419771968	DQ697944	uc008smn	0.00127316	9.92333	up	UCSC_knowngene	chr4	+	42415893	42416577
CUST_6266_PI419771968	AK019563	uc009msc	0.00105403	9.8683	up	UCSC_knowngene	chr8	+	92883601	92885654
CUST_7963_PI419771968		AK015601	0.0159938	9.83024	up	NRED	chr6	-	137094396	137095450
CUST_3192_PI419771968	AK019031	uc007van	4.45e-05	9.82072	up	UCSC_knowngene	chr14	-	122276084	122278629
CUST_6426_PI419771968	AK019824	uc009oso	0.00918929	9.77281	up	UCSC_knowngene	chr9	+	34924312	34938507
CUST_8134_PI419771968		AK016157	0.00074	9.74134	up	NRED	chr5	+	113571468	113571849
CUST_7061_PI419771968		AK006642	0.0213506	9.7266	up	NRED	chr1	-	63294594	63295073
CUST_9920_PI419771968		AK035449	0.00577561	9.7018	up	NRED	chr6	+	15045412	15046836
CUST_5457_PI419771968	AK006454	uc009auq	0.000487	9.65414	up	UCSC_knowngene	chr5	+	152171279	152216658
CUST_7048_PI419771968		AK006574	0.00280576	9.63978	up	NRED	chr17	+	37060736	37070377
CUST_7170_PI419771968		AK007117	8.93e-05	9.62819	up	NRED	chr1	+	71149066	71149981
CUST_5236_PI419771968	AK006413	uc008xmo	0.00927115	9.58704	up	UCSC_knowngene	chr5	-	64846051	64859181
CUST_4909_PI419771968	AY512912	uc008sxl	0.00113667	9.54285	up	UCSC_knowngene	chr4	+	55576136	55612168
CUST_954_PI419771968		AK078497	0.00118681	9.52248	up	Fantom_stringent	chr19	+	57583053	57587273
CUST_13200_PI419771968		BC038629	0.0172823	9.50124	up	NRED	chr11	-	119797026	119797834
CUST_2369_PI419771968	AK040752	uc007ktl	0.000286	9.46786	up	UCSC_knowngene	chr11	-	86935068	86940407
CUST_9723_PI419771968		AK033633	0.000144	9.4474	up	NRED	chr19	-	47140774	47142876
CUST_2581_PI419771968	AK043991	uc007nmi	0.000896	9.44352	up	UCSC_knowngene	chr12	+	50491645	50508140
CUST_7912_PI419771968		AK015443	0.0328321	9.43906	up	NRED	chr4	+	141208038	141208577
CUST_5664_PI419771968	U83175	uc009den	0.0053064	9.38169	up	UCSC_knowngene	chr6	-	113017426	113027191
CUST_5222_PI419771968	AK030154	uc008xka	0.0054126	9.36167	up	UCSC_knowngene	chr5	-	50839901	50935730
CUST_2940_PI419771968	AK076988	uc007rxs	0.0287056	9.33482	up	UCSC_knowngene	chr13	+	115399080	115447032
CUST_1526_PI419771968		AK161816	0.0319503	9.30863	up	Fantom_stringent	chr2	+	58419793	58588068
CUST_8798_PI419771968		AK019642	0.021182	9.29397	up	NRED	chr14	-	64718131	64723072
CUST_7652_PI419771968		AK014121	0.017359	9.1802	up	NRED	chr15	+	74614494	74631070
CUST_406_PI419771968		AK016455	0.00954931	9.17932	up	Fantom_stringent	chr11	-	75403166	75408273
CUST_11687_PI419771968		AK076825	0.0230623	9.17878	up	NRED	chr5	+	68332907	68368309
CUST_6612_PI419771968	AK197603	uc009roa	0.0163648	9.15961	up	UCSC_knowngene	chr9	+	107899833	107900393
CUST_4423_PI419771968	AK030357	uc008mcd	0.0148838	9.14104	up	UCSC_knowngene	chr2	-	124957292	124962355
CUST_6984_PI419771968		AK006090	0.00304975	9.12887	up	NRED	chr11	+	83557932	83558369
CUST_3990_PI419771968	AK079818	uc008ftc	0.0335073	9.11484	up	UCSC_knowngene	chr18	-	80738630	80741285
CUST_8009_PI419771968		AK015743	0.000728	9.08132	up	NRED	chr4	+	94223236	94223769
CUST_7486_PI419771968		AK012876	0.000705	9.07567	up	NRED	chr14	+	61004820	61007030
CUST_5766_PI419771968	AK131696	uc009exx	0.0413983	9.05771	up	UCSC_knowngene	chr7	+	4478235	4482177
CUST_5805_PI419771968	AK076358	uc009fxk	0.00621298	9.02006	up	UCSC_knowngene	chr7	+	28712742	28716022
CUST_10298_PI419771968		AK039212	0.00214208	9.01317	up	NRED	chr1	+	66735509	66738911
CUST_6629_PI419771968	4930520O04Rik	uc009rxf	0.00255232	9.00335	up	UCSC_knowngene	chr9	+	114277533	114286347
CUST_3460_PI419771968	AK086168	uc007ypf	0.000197	8.9613	up	UCSC_knowngene	chr16	-	19876777	19884367
CUST_13005_PI419771968		AK170065	5.03e-05	8.95752	up	NRED	chr19	+	32463010	32464623
CUST_3290_PI419771968	ErT-1	uc007wgd	0.00935944	8.95188	up	UCSC_knowngene	chr15	+	74653494	74654866
CUST_1358_PI419771968		AK146114	1.38e-05	8.92059	up	Fantom_stringent	chr4	-	154338017	154338458
CUST_4172_PI419771968	AK076668	uc008iba	0.0335266	8.9204	up	UCSC_knowngene	chr19	-	59003133	59018144
CUST_7915_PI419771968		AK015450	0.00849451	8.89944	up	NRED	chr13	+	46031408	46032273
CUST_5534_PI419771968	TCR-beta chain	uc009bpv	0.00198554	8.89649	up	UCSC_knowngene	chr6	+	41493362	41498351
CUST_10632_PI419771968		AK043475	0.000142	8.86587	up	NRED	chr19	-	8830857	8831410
CUST_2613_PI419771968	AK048798	uc007nws	0.00228779	8.86213	up	UCSC_knowngene	chr12	-	75027467	75050772
CUST_9642_PI419771968		AK032771	0.0178473	8.80966	up	NRED	chr14	+	120078903	120081153
CUST_9144_PI419771968		AK020850	0.00974004	8.80789	up	NRED	chr2	+	156006312	156006849
CUST_7884_PI419771968		AK015342	0.00666211	8.80593	up	NRED	chr17	-	13446863	13448379
CUST_3283_PI419771968	etoile	uc007wbg	0.00310402	8.80401	up	UCSC_knowngene	chr15	+	68860144	68931641
CUST_8035_PI419771968		AK015835	5.83e-05	8.79415	up	NRED	chr13	-	50848761	50860617
CUST_5746_PI419771968	Ifltd1	uc009erk	0.00370095	8.79197	up	UCSC_knowngene	chr6	-	145313653	145562793
CUST_10076_PI419771968		AK037080	0.0017746	8.7719	up	NRED	chr11	+	82617220	82620916
CUST_2600_PI419771968	Spg3a	uc007ntd	0.00263956	8.76943	up	UCSC_knowngene	chr12	+	71064459	71070731
CUST_6986_PI419771968		AK006100	0.00162389	8.76597	up	NRED	chr9	+	8134512	8135844
CUST_11952_PI419771968		AK081192	0.0108493	8.75269	up	NRED	chr17	+	80787509	80790678
CUST_7139_PI419771968		AK006956	0.00820892	8.71893	up	NRED	chr6	-	29997410	29997951
CUST_9435_PI419771968		AK030271	0.007344	8.6979	up	NRED	chr13	+	13127124	13131203
CUST_8344_PI419771968		AK017078	0.0346573	8.64705	up	NRED	chr19	-	50614298	50615375
CUST_13498_PI419771968	4930426L09Rik	NR_024323	0.000286	8.64442	up	RefSeq_NR	chr2	+	18919945	18921431
CUST_3292_PI419771968	AK153212	uc007wgq	0.00698204	8.63332	up	UCSC_knowngene	chr15	-	74961806	74964237
CUST_4353_PI419771968	AK143789	uc008lgb	0.00149664	8.63123	up	UCSC_knowngene	chr2	+	93292975	93310028
CUST_7511_PI419771968		AK013113	0.00420018	8.60594	up	NRED	chr7	+	29962093	29964216
CUST_7807_PI419771968		AK015120	0.00205659	8.60093	up	NRED	chr8	-	60129685	60131156
CUST_4011_PI419771968	AK081788	uc008fxu	0.000606	8.59283	up	UCSC_knowngene	chr19	+	3958805	3972101
CUST_5209_PI419771968	AK076853	uc008xgw	0.0428284	8.58594	up	UCSC_knowngene	chr5	+	39698367	39704534
CUST_10777_PI419771968		AK045080	0.0100882	8.53713	up	NRED	chr18	+	47637157	47654065
CUST_8174_PI419771968		AK016314	0.000706	8.53194	up	NRED	chr17	-	4851697	4854482
CUST_7071_PI419771968		AK006682	0.014768	8.52562	up	NRED	chr13	+	94994880	94995980
CUST_2107_PI419771968	AK019697	uc007gxe	0.044621	8.47357	up	UCSC_knowngene	chr10	+	97177418	97181997
CUST_5026_PI419771968	AK019743	uc008uvv	0.000233	8.47191	up	UCSC_knowngene	chr4	-	128727331	128735227
CUST_5687_PI419771968	mKIAA1238	uc009dpe	0.000151	8.47051	up	UCSC_knowngene	chr6	-	122397319	122416605
CUST_110_PI419771968		AK006130	0.0104015	8.43933	up	Fantom_stringent	chr9	+	119892263	119893909
CUST_4705_PI419771968	AK015762	uc008qdl	0.00175041	8.43365	up	UCSC_knowngene	chr3	-	91906499	91946666
CUST_7873_PI419771968		AK015297	0.00601804	8.37317	up	NRED	chr17	+	22099552	22208135
CUST_7030_PI419771968		AK006399	0.0246568	8.36118	up	NRED	chr11	+	5441915	5442571
CUST_3626_PI419771968	AK037830	uc008ahw	0.00399217	8.3367	up	UCSC_knowngene	chr17	-	7002738	7032339
CUST_13346_PI419771968		L09009	0.0245355	8.33389	up	NRED	chr6	-	69254840	69631691
CUST_5533_PI419771968	TCR-beta chain	uc009bpu	0.00101814	8.30157	up	UCSC_knowngene	chr6	+	41493223	41498351
CUST_5268_PI419771968	AK006071	uc008xwg	0.023634	8.28044	up	UCSC_knowngene	chr5	+	77894512	77897876
CUST_5859_PI419771968	U89428	uc009grb	0.00281295	8.27152	up	UCSC_knowngene	chr7	+	52093358	52093795
CUST_3118_PI419771968	Defb42	uc007uhg	0.0098368	8.24245	up	UCSC_knowngene	chr14	+	63665827	63676986
CUST_4740_PI419771968	AK038386	uc008qru	0.013337	8.23525	up	UCSC_knowngene	chr3	+	102066327	102249055
CUST_5483_PI419771968	AK076883	uc009beq	0.00463076	8.22448	up	UCSC_knowngene	chr6	+	29935330	29943776
CUST_8207_PI419771968		AK016440	0.0443583	8.22374	up	NRED	chr14	-	22687851	22708988
CUST_3178_PI419771968	AK045385	uc007uxx	0.00598637	8.21967	up	UCSC_knowngene	chr14	-	106024625	106042942
CUST_3598_PI419771968	AK160437	uc007zzp	0.0105272	8.14583	up	UCSC_knowngene	chr16	-	93346301	93359788
CUST_381_PI419771968		AK015168	0.0389703	8.07353	up	Fantom_stringent	chr3	+	32923698	32987529
CUST_11299_PI419771968		AK051241	0.0134589	8.02163	up	NRED	chr15	+	25388243	25390738
CUST_1960_PI419771968	AK016383	uc007evj	0.0280747	8.01235	up	UCSC_knowngene	chr10	+	37895585	37901709
CUST_13028_PI419771968		AK207509	0.00775192	8.01151	up	NRED	chr14	-	8996720	8997099
CUST_6855_PI419771968		AK003348	0.00760699	7.99982	up	NRED	chr5	+	121053753	121054258
CUST_4528_PI419771968	BC054394	uc008nzg	0.026495	7.9979	up	UCSC_knowngene	chr2	-	166924293	166927030
CUST_11604_PI419771968		AK053940	0.00532799	7.99391	up	NRED	chr6	-	4030317	4036948
CUST_5478_PI419771968	AK040992	uc009bas	0.00353423	7.96969	up	UCSC_knowngene	chr6	-	21802980	21808178
CUST_3547_PI419771968	AK076959	uc007zqw	0.00488214	7.92289	up	UCSC_knowngene	chr16	+	70954532	71011132
CUST_8992_PI419771968		AK020381	0.00642419	7.92235	up	NRED	chr11	-	68504372	68505272
CUST_7202_PI419771968		AK007248	0.00843268	7.91982	up	NRED	chr8	-	36157592	36158296
CUST_8314_PI419771968		AK016969	0.0125417	7.90279	up	NRED	chr4	+	138422752	138423938
CUST_5671_PI419771968	AK202580	uc009did	0.0122941	7.90159	up	UCSC_knowngene	chr6	-	114809091	114809360
CUST_2332_PI419771968	2310047D13Rik	uc007kff	0.00402303	7.8304	up	UCSC_knowngene	chr11	+	75993172	76028329
CUST_2474_PI419771968	AK007042	uc007mfi	0.00159097	7.82444	up	UCSC_knowngene	chr11	+	114059571	114060513
CUST_8144_PI419771968		AK016200	0.00685871	7.79369	up	NRED	chr18	+	10706857	10711830
CUST_10059_PI419771968		AK036852	0.0305995	7.79352	up	NRED	chr19	+	60220591	60221783
CUST_2426_PI419771968	Psme3	uc007lom	0.0122157	7.77575	up	UCSC_knowngene	chr11	+	101177564	101178527
CUST_7001_PI419771968		AK006220	0.00234827	7.75113	up	NRED	chr4	-	123980079	123988704
CUST_1674_PI419771968	AK016177	uc007bax	0.00111351	7.74587	up	UCSC_knowngene	chr1	-	57416065	57434388
CUST_7367_PI419771968		AK010155	0.00082	7.7376	up	NRED	chr5	+	23953730	23954302
CUST_4355_PI419771968	AK140370	uc008lgr	0.000508	7.73167	up	UCSC_knowngene	chr2	-	94092035	94104915
CUST_2373_PI419771968	AK040276	uc007kve	0.0236261	7.7277	up	UCSC_knowngene	chr11	+	87872567	87880978
CUST_7968_PI419771968		AK015613	0.000405	7.71727	up	NRED	chr10	-	119262259	119289446
CUST_13559_PI419771968	Gt(ROSA)26Sor	NR_027010	0.00989098	7.70997	up	RefSeq_NR	chr6	-	113017422	113027238
CUST_6293_PI419771968	AK132885	uc009nck	0.0242473	7.69888	up	UCSC_knowngene	chr8	+	107813888	107815218
CUST_7855_PI419771968		AK015244	0.0049163	7.6509	up	NRED	chr16	-	42493341	42495253
CUST_9760_PI419771968		AK034101	0.000945	7.63387	up	NRED	chr13	-	44281128	44285563
CUST_12275_PI419771968		AK084937	0.00186769	7.62003	up	NRED	chr6	-	4543803	4546651
CUST_12531_PI419771968		AK088428	5.31e-07	7.58895	up	NRED	chr2	+	38921134	38921886
CUST_2827_PI419771968	AK030052	uc007qug	0.0107904	7.58697	up	UCSC_knowngene	chr13	-	58854075	58863672
CUST_12646_PI419771968		AK131801	0.00453706	7.56321	up	NRED	chr7	+	96658516	96659878
CUST_7783_PI419771968		AK015044	0.00384953	7.56181	up	NRED	chr2	+	128864281	128865716
CUST_12055_PI419771968		AK082339	0.00860749	7.55665	up	NRED	chr6	+	128306021	128308855
CUST_1793_PI419771968	AK019844	uc007cwa	0.00317215	7.55561	up	UCSC_knowngene	chr1	+	140874233	140875823
CUST_9563_PI419771968		AK031826	0.0171771	7.54454	up	NRED	chr3	+	34564164	34576917
CUST_12665_PI419771968		AK133080	0.00960988	7.51803	up	NRED	chr11	-	79805811	79806303
CUST_4085_PI419771968	AK161402	uc008hbx	0.0158384	7.49398	up	UCSC_knowngene	chr19	+	27419258	27430896
CUST_8092_PI419771968		AK016050	0.00242591	7.46132	up	NRED	chr2	-	115159683	115160274
CUST_3009_PI419771968	Antxrl	uc007tah	0.00867899	7.41158	up	UCSC_knowngene	chr14	+	34866356	34868154
CUST_4442_PI419771968	AK030453	uc008mlw	0.0319051	7.40631	up	UCSC_knowngene	chr2	-	131645741	131673396
CUST_3413_PI419771968	AK035706(HOTAIR)	uc007xwx	0.0053586	7.39294	up	UCSC_knowngene	chr15	-	102774492	102778161
CUST_7013_PI419771968		AK006297	0.00722156	7.37823	up	NRED	chr13	+	3497296	3500441
CUST_3214_PI419771968	Prlr	uc007vfv	0.0065442	7.3249	up	UCSC_knowngene	chr15	+	10107409	10278311
CUST_2541_PI419771968	AK133134	uc007nbb	0.00211084	7.2942	up	UCSC_knowngene	chr12	+	11445038	11451618
CUST_13522_PI419771968	1700022A21Rik	NR_003953	0.00702619	7.2528	up	RefSeq_NR	chr5	+	24151270	24154678
CUST_4869_PI419771968	AK052881	uc008sec	0.00847904	7.25016	up	UCSC_knowngene	chr4	+	24719826	24727457
CUST_9210_PI419771968		AK021053	0.00101571	7.23285	up	NRED	chr4	+	110107406	110108596
CUST_8722_PI419771968		AK018973	0.00864436	7.2314	up	NRED	chr15	+	99750304	99750729
CUST_732_PI419771968		AK042866	0.000219	7.22781	up	Fantom_stringent	chr6	+	118405224	118405719
CUST_7105_PI419771968		AK006833	0.00295874	7.21252	up	NRED	chr8	+	23719552	23719895
CUST_3994_PI419771968	AK015395	uc008fuc	0.0342438	7.17994	up	UCSC_knowngene	chr18	+	83025285	83028554
CUST_7197_PI419771968		AK007225	0.0123301	7.15306	up	NRED	chr9	-	48304083	48304462
CUST_9428_PI419771968		AK030164	0.000276	7.11672	up	NRED	chr1	-	168308012	168310049
CUST_7614_PI419771968		AK013809	0.00958863	7.11149	up	NRED	chr12	+	118770301	118770766
CUST_8065_PI419771968		AK015951	0.0030334	7.10365	up	NRED	chr2	-	113531209	113548707
CUST_8775_PI419771968		AK019562	0.000456	7.08338	up	NRED	chr2	+	153318525	153319577
CUST_2450_PI419771968	BC058545	uc007lzt	0.000931	7.07575	up	UCSC_knowngene	chr11	+	106649951	106651519
CUST_11854_PI419771968		AK079790	0.0182941	7.05731	up	NRED	chr2	+	44058048	44060469
CUST_2713_PI419771968	AK080151	uc007phg	0.00967243	7.04907	up	UCSC_knowngene	chr12	-	117341264	117377121
CUST_5278_PI419771968	AK042933	uc008yai	0.00163508	7.02091	up	UCSC_knowngene	chr5	+	89222920	89242495
CUST_5367_PI419771968	AK049264	uc008zex	0.0139	7.01379	up	UCSC_knowngene	chr5	+	116573622	116579119
CUST_10392_PI419771968		AK040401	0.00660351	6.99902	up	NRED	chr4	+	116299546	116301290
CUST_7854_PI419771968		AK015242	0.00964535	6.9844	up	NRED	chr4	+	150931465	150932630
CUST_13324_PI419771968		BC100512	0.0381166	6.97933	up	NRED	chr7	+	87896730	87897996
CUST_11234_PI419771968		AK050124	0.00464402	6.96777	up	NRED	chr3	-	135094094	135096867
CUST_2594_PI419771968	AK033000	uc007nrn	0.00253729	6.96525	up	UCSC_knowngene	chr12	-	67585591	67587828
CUST_3176_PI419771968	AK034417	uc007uxv	0.0131502	6.94455	up	UCSC_knowngene	chr14	+	105989273	105993121
CUST_8145_PI419771968		AK016203	0.0285429	6.94242	up	NRED	chr5	+	132356138	132359638
CUST_4433_PI419771968	AK042010	uc008mhq	0.00168144	6.936	up	UCSC_knowngene	chr2	+	129123105	129133562
CUST_4183_PI419771968	AK006958	uc008iem	0.00220277	6.90916	up	UCSC_knowngene	chr2	-	4053110	4062187
CUST_489_PI419771968		AK019349	0.00355632	6.89692	up	Fantom_stringent	chr11	-	119794323	119794849
CUST_2385_PI419771968	AK015094	uc007kxe	0.0187565	6.89468	up	UCSC_knowngene	chr11	+	90744633	90756466
CUST_1681_PI419771968	AK219417	uc007bdt	0.0368907	6.88536	up	UCSC_knowngene	chr1	+	59383514	59409292
CUST_12612_PI419771968		AK089876	0.0461202	6.84217	up	NRED	chr9	+	25685634	25688054
CUST_4854_PI419771968	AK007255	uc008sac	0.000128	6.80472	up	UCSC_knowngene	chr4	+	11893711	11921427
CUST_8517_PI419771968		BC025014	0.000879	6.77449	up	NRED	chr14	-	73952650	73993504
CUST_8804_PI419771968		AK019652	0.000133	6.76028	up	NRED	chr13	-	66519267	66520533
CUST_11221_PI419771968		AK049966	0.00925697	6.74773	up	NRED	chr4	-	82230951	82233223
CUST_4984_PI419771968	AK019375	uc008ucu	0.00121557	6.70671	up	UCSC_knowngene	chr4	-	109649351	109650096
CUST_13143_PI419771968		BC023886	0.0011125	6.70214	up	NRED	chr2	+	26301474	26313515
CUST_8343_PI419771968		AK017077	0.0017339	6.67619	up	NRED	chr14	+	31421102	31424950
CUST_8914_PI419771968		AK020111	0.00479367	6.65456	up	NRED	chr3	+	130894760	130895884
CUST_4792_PI419771968	AK135894	uc008rkb	0.000982	6.6358	up	UCSC_knowngene	chr3	-	132505165	132541560
CUST_2468_PI419771968	AK015526	uc007meg	0.00137224	6.63507	up	UCSC_knowngene	chr11	+	112686467	112687524
CUST_10877_PI419771968		AK046349	0.0382261	6.63279	up	NRED	chr6	+	125444441	125449686
CUST_6637_PI419771968	Zcwpw2	uc009rzf	0.0165495	6.62985	up	UCSC_knowngene	chr9	-	117785119	117923278
CUST_1002_PI419771968		AK080300	0.00048	6.62611	up	Fantom_stringent	chr6	-	47402604	47405058
CUST_705_PI419771968		AK041289	0.000141	6.59148	up	Fantom_stringent	chr12	-	33604248	33638654
CUST_7122_PI419771968		AK006880	0.0178339	6.57753	up	NRED	chr8	+	112530779	112531554
CUST_5535_PI419771968	TCR-beta chain	uc009bpy	0.00527746	6.56989	up	UCSC_knowngene	chr6	+	41493809	41498351
CUST_13081_PI419771968		AJ308964	0.0068187	6.56397	up	NRED	chr12	-	117341253	117376994
CUST_8126_PI419771968		AK016139	0.00266024	6.55448	up	NRED	chr17	-	27460855	27461998
CUST_12738_PI419771968		AK138158	0.0133347	6.53805	up	NRED	chr18	+	31769134	31773701
CUST_8725_PI419771968		AK018999	0.00334183	6.52699	up	NRED	chr13	-	49436231	49436745
CUST_3727_PI419771968	AK140218	uc008cad	0.00193961	6.51629	up	UCSC_knowngene	chr17	-	34056239	34057430
CUST_4879_PI419771968	AK086793	uc008sjb	0.0229183	6.50841	up	UCSC_knowngene	chr4	+	41467928	41472856
CUST_5839_PI419771968	AK005849	uc009gkw	0.00220531	6.49981	up	UCSC_knowngene	chr7	+	39164383	39228234
CUST_11017_PI419771968		AK047741	0.00845958	6.46785	up	NRED	chr8	-	87577087	87584327
CUST_10753_PI419771968		AK044811	0.00118477	6.46766	up	NRED	chr13	+	46035181	46036067
CUST_8829_PI419771968		AK019739	0.0193821	6.46269	up	NRED	chr4	-	57740640	57743292
CUST_8496_PI419771968		BC002209	0.00281317	6.46111	up	NRED	chr11	+	6375032	6375427
CUST_11493_PI419771968		AK052984	0.00475087	6.45942	up	NRED	chr15	-	102953500	102977259
CUST_6193_PI419771968	AK016128	uc009lrw	0.000147	6.45432	up	UCSC_knowngene	chr8	+	50456266	50587338
CUST_6972_PI419771968		AK006010	0.00663402	6.43911	up	NRED	chr5	+	112585256	112594264
CUST_8131_PI419771968		AK016151	0.00604448	6.42438	up	NRED	chr12	-	34043107	34079625
CUST_5114_PI419771968	C030017K20Rik	uc008wdm	4.38e-05	6.41913	up	UCSC_knowngene	chr4	+	154825678	154840514
CUST_3129_PI419771968	AK046150	uc007umh	0.03225	6.40251	up	UCSC_knowngene	chr14	-	69946055	69955139
CUST_3287_PI419771968	Gm628	uc007wcl	0.0128631	6.3849	up	UCSC_knowngene	chr15	-	73591839	73661413
CUST_9047_PI419771968		AK020520	0.0113622	6.37172	up	NRED	chr2	+	169060490	169063270
CUST_1498_PI419771968		AK158485	0.00949079	6.3473	up	Fantom_stringent	chr6	+	68016341	68019716
CUST_1775_PI419771968	AK020645	uc007cpy	0.0137882	6.34413	up	UCSC_knowngene	chr1	+	135188565	135189518
CUST_5757_PI419771968	AK051804	uc009evj	0.00417624	6.34397	up	UCSC_knowngene	chr7	-	3583715	3596238
CUST_6646_PI419771968	Slc25a38	uc009scb	0.00387834	6.34083	up	UCSC_knowngene	chr9	+	120019516	120020715
CUST_3219_PI419771968	AK005793	uc007vgq	0.00452887	6.32944	up	UCSC_knowngene	chr15	+	10644590	10648222
CUST_6292_PI419771968	4931428F04Rik	uc009nch	0.013263	6.29142	up	UCSC_knowngene	chr8	-	107811813	107813762
CUST_10989_PI419771968		AK047499	0.000515	6.28324	up	NRED	chr4	+	116299447	116300820
CUST_11678_PI419771968		AK076620	0.00127909	6.27919	up	NRED	chr11	+	63826116	63828726
CUST_9226_PI419771968		AK021085	0.0184529	6.26493	up	NRED	chr5	-	49388951	49389778
CUST_9392_PI419771968		AK029560	0.00123032	6.24387	up	NRED	chr9	-	63432894	63450292
CUST_7078_PI419771968		AK006714	0.00277417	6.24292	up	NRED	chr11	+	58136489	58137941
CUST_5965_PI419771968	AK021007	uc009ihq	0.00835568	6.22305	up	UCSC_knowngene	chr7	+	97625681	97653350
CUST_8251_PI419771968		AK016717	6.04e-05	6.19794	up	NRED	chr15	+	75867075	75868326
CUST_1325_PI419771968		AK142341	0.000823	6.18831	up	Fantom_stringent	chr2	-	144381431	144381891
CUST_1971_PI419771968	AK035573	uc007eyw	0.00560556	6.18475	up	UCSC_knowngene	chr10	-	42460344	42478466
CUST_5779_PI419771968	AK007312	uc009fcd	0.00412183	6.15277	up	UCSC_knowngene	chr7	-	6929014	6930131
CUST_9483_PI419771968		AK031091	0.00210257	6.14424	up	NRED	chr9	-	4443465	4445755
CUST_10928_PI419771968		AK046914	0.00265982	6.12765	up	NRED	chr5	+	144527179	144529097
CUST_1012_PI419771968		AK080548	0.0308021	6.12604	up	Fantom_stringent	chr17	+	56381138	56382224
CUST_1005_PI419771968		AK080390	4.26e-05	6.11467	up	Fantom_stringent	chr9	-	20410576	20412060
CUST_4173_PI419771968	AK143957	uc008ibo	0.00377944	6.11186	up	UCSC_knowngene	chr19	+	60019624	60024301
CUST_8991_PI419771968		AK020380	0.00111061	6.09869	up	NRED	chr18	-	58037368	58038166
CUST_402_PI419771968		AK016196	0.00581518	6.07847	up	Fantom_stringent	chr11	-	26286743	26287433
CUST_11070_PI419771968		AK048225	0.00037	6.07177	up	NRED	chr12	+	30213265	30216444
CUST_3246_PI419771968	AK085881	uc007vow	0.0278121	6.0706	up	UCSC_knowngene	chr15	-	41589605	41620457
CUST_2358_PI419771968	AK085477	uc007krk	0.00078	6.03063	up	UCSC_knowngene	chr11	+	85048667	85051804
CUST_2384_PI419771968	AK147079	uc007kxd	0.00140341	6.02887	up	UCSC_knowngene	chr11	+	90666004	90756466
CUST_4132_PI419771968	AK076978	uc008hoq	0.000574	6.02248	up	UCSC_knowngene	chr19	+	43749667	43751660
CUST_7363_PI419771968		AK010100	0.00351666	6.02018	up	NRED	chr13	+	83204455	83333346
CUST_7332_PI419771968		AK009534	0.000186	6.01881	up	NRED	chr1	-	152167810	152193901
CUST_3504_PI419771968	AK016521	uc007zfw	0.000666	6.01233	up	UCSC_knowngene	chr16	-	42725814	42875693
CUST_4858_PI419771968	AK144882	uc008say	0.00259089	6.00936	up	UCSC_knowngene	chr4	-	14139158	14218456
CUST_2370_PI419771968	AK003943	uc007kuh	0.00310818	6.00337	up	UCSC_knowngene	chr11	+	87514897	87518830
CUST_10649_PI419771968		AK043615	0.0087985	5.99889	up	NRED	chr2	-	6176991	6178312
CUST_5432_PI419771968	AK009603	uc009akc	0.0017977	5.98699	up	UCSC_knowngene	chr5	+	144090986	144094379
CUST_3790_PI419771968	Rab22B	uc008dgi	0.0178095	5.98504	up	UCSC_knowngene	chr17	-	66070608	66122021
CUST_4313_PI419771968	AK019889	uc008kbz	0.00123174	5.98424	up	UCSC_knowngene	chr2	-	72622737	72651774
CUST_12551_PI419771968		AK089117	0.0233521	5.97727	up	NRED	chr12	+	85764759	85766775
CUST_6823_PI419771968	AK016790	uc009vgj	0.041948	5.97428	up	UCSC_knowngene	chrY_random	-	18002746	18013379
CUST_3786_PI419771968	AK019598	uc008dft	0.00842223	5.96251	up	UCSC_knowngene	chr17	-	64591752	64619045
CUST_905_PI419771968		AK076659	0.000892	5.95996	up	Fantom_stringent	chr1	+	162143103	162144018
CUST_2428_PI419771968	AK076700	uc007lpy	0.0472773	5.95576	up	UCSC_knowngene	chr11	+	101813733	101821887
CUST_7145_PI419771968		AK006989	0.0148531	5.94781	up	NRED	chr13	+	113926292	113934220
CUST_11427_PI419771968		AK052417	0.0136486	5.93238	up	NRED	chr5	+	66690769	66691164
CUST_2586_PI419771968	AK006973	uc007nny	0.00368488	5.92599	up	UCSC_knowngene	chr12	+	55963977	55964651
CUST_6004_PI419771968	AY512917	uc009jaz	0.0288955	5.92368	up	UCSC_knowngene	chr7	+	114386535	114443910
CUST_4262_PI419771968	AK019757	uc008jiw	0.0203393	5.92001	up	UCSC_knowngene	chr2	+	34657837	34667426
CUST_7771_PI419771968		AK014993	0.00208851	5.91229	up	NRED	chr14	-	64477572	64479385
CUST_4112_PI419771968	AK087313	uc008hli	0.0448326	5.90199	up	UCSC_knowngene	chr19	+	40942805	40957129
CUST_7029_PI419771968		AK006396	0.00074	5.89254	up	NRED	chr13	+	47201786	47204887
CUST_9343_PI419771968		AK028839	0.00325273	5.88176	up	NRED	chr8	+	120205521	120217098
CUST_5152_PI419771968	AK044020	uc008wps	0.0193365	5.87757	up	UCSC_knowngene	chr5	+	22056254	22207317
CUST_1586_PI419771968		AK170699	0.000885	5.86101	up	Fantom_stringent	chr10	-	33650635	33653146
CUST_3562_PI419771968	AK144299	uc007zsi	0.0129001	5.85648	up	UCSC_knowngene	chr16	+	77329449	77680432
CUST_8301_PI419771968		AK016894	0.00775062	5.85222	up	NRED	chr3	-	128402450	128404467
CUST_6115_PI419771968	B130050I23Rik	uc009ktf	0.00367586	5.81808	up	UCSC_knowngene	chr8	+	4206231	4211257
CUST_8281_PI419771968		AK016834	0.0172032	5.78431	up	NRED	chr13	+	102024273	102063351
CUST_471_PI419771968		AK018874	0.000187	5.78195	up	Fantom_stringent	chr5	-	122160795	122161490
CUST_5986_PI419771968	AK148373	uc009ipj	0.00254923	5.7775	up	UCSC_knowngene	chr7	+	108986395	108991155
CUST_7905_PI419771968		AK015420	0.0217004	5.77279	up	NRED	chr5	+	50542571	50547331
CUST_7781_PI419771968		AK015040	0.0276424	5.76897	up	NRED	chr13	-	31305278	31332955
CUST_3388_PI419771968	AK084200	uc007xka	0.0307668	5.73576	up	UCSC_knowngene	chr15	-	96062300	96085115
CUST_2528_PI419771968	BC065777	uc007myx	0.000323	5.72169	up	UCSC_knowngene	chr12	+	5382675	5423111
CUST_12849_PI419771968		AK145188	0.000373	5.71626	up	NRED	chr6	+	72389044	72390604
CUST_6051_PI419771968	AK086010	uc009jts	0.0102758	5.71298	up	UCSC_knowngene	chr7	-	134115235	134119024
CUST_5014_PI419771968	AK160260	uc008uqs	0.0140763	5.70847	up	UCSC_knowngene	chr4	+	124246432	124252781
CUST_13252_PI419771968		BC051511	0.0310787	5.6972	up	NRED	chr15	-	81073089	81078398
CUST_8529_PI419771968		BC028810	0.0028727	5.68183	up	NRED	chr9	-	105297729	105304473
CUST_6163_PI419771968	AK006702	uc009lhk	0.00368954	5.65357	up	UCSC_knowngene	chr8	+	27193080	27206992
CUST_8715_PI419771968		AK018903	0.000444	5.64297	up	NRED	chr2	-	90585305	90585985
CUST_5007_PI419771968	BC051525	uc008unk	0.0364441	5.64163	up	UCSC_knowngene	chr4	+	120288442	120295287
CUST_5515_PI419771968	AnMKRN1	uc009blv	0.00194639	5.64154	up	UCSC_knowngene	chr6	+	39370376	39371293
CUST_1401_PI419771968		AK153660	0.00535668	5.57187	up	Fantom_stringent	chr12	+	103150897	103153863
CUST_1141_PI419771968		AK087461	0.0044932	5.56783	up	Fantom_stringent	chr4	-	109335539	109339287
CUST_11785_PI419771968		AK078603	0.0045491	5.56767	up	NRED	chr9	-	20347813	20349873
CUST_8031_PI419771968		AK015822	0.00616635	5.56637	up	NRED	chr5	-	48394304	48396946
CUST_2128_PI419771968	AK206655	uc007hcl	0.00264717	5.56204	up	UCSC_knowngene	chr10	+	116343830	116344080
CUST_2824_PI419771968	AK039557	uc007qtg	0.0135355	5.56107	up	UCSC_knowngene	chr13	+	58250137	58251053
CUST_7899_PI419771968		AK015407	0.0304031	5.55398	up	NRED	chr14	+	48518538	48563864
CUST_4117_PI419771968	AK167556	uc008hmg	0.00329329	5.54621	up	UCSC_knowngene	chr19	+	41821450	41824587
CUST_3538_PI419771968	AK015492	uc007znn	0.0171503	5.53557	up	UCSC_knowngene	chr16	-	58404990	58408365
CUST_4523_PI419771968	AK006001	uc008nvv	0.00860054	5.53252	up	UCSC_knowngene	chr2	-	164569064	164571431
CUST_2875_PI419771968	AK136039	uc007rgm	0.022589	5.52795	up	UCSC_knowngene	chr13	+	76393394	76409906
CUST_2492_PI419771968	AK007898	uc007mmq	0.0190914	5.51735	up	UCSC_knowngene	chr11	+	116715075	116715570
CUST_6706_PI419771968	AK135675	uc009svq	0.0212682	5.49941	up	UCSC_knowngene	chrX	+	26962428	26997133
CUST_6947_PI419771968		AK005840	0.0343579	5.48249	up	NRED	chr7	+	90004762	90008358
CUST_6505_PI419771968	AK047520	uc009pzg	0.00338229	5.46645	up	UCSC_knowngene	chr9	+	60535384	60538204
CUST_10340_PI419771968		AK039686	0.00259957	5.46524	up	NRED	chr6	-	128137835	128150641
CUST_9140_PI419771968		AK020838	0.0017524	5.46275	up	NRED	chr7	-	89902375	89903402
CUST_4657_PI419771968	AK085325	uc008pkm	0.0174362	5.44465	up	UCSC_knowngene	chr3	-	65127941	65153351
CUST_12805_PI419771968		AK142189	0.000978	5.40832	up	NRED	chr8	-	93430430	93432315
CUST_12739_PI419771968		AK138162	6.94e-05	5.40423	up	NRED	chr6	-	129481967	129483835
CUST_12942_PI419771968		AK161442	0.00917618	5.3833	up	NRED	chr3	+	82708398	82747560
CUST_4545_PI419771968	AK133337	uc008ocj	0.0297564	5.37287	up	UCSC_knowngene	chr2	-	171783688	171788324
CUST_9225_PI419771968		AK021082	0.000125	5.35764	up	NRED	chr2	+	130665931	130666704
CUST_1499_PI419771968		AK158492	0.00095	5.35122	up	Fantom_stringent	chr8	-	41392791	41393755
CUST_4608_PI419771968	AK007174	uc008ouc	0.0066069	5.34135	up	UCSC_knowngene	chr3	-	28637701	28679622
CUST_8712_PI419771968		AK018860	0.0133777	5.34116	up	NRED	chr1	-	94468950	94469326
CUST_7177_PI419771968		AK007141	0.00566795	5.33963	up	NRED	chr18	-	83462183	83495276
CUST_7951_PI419771968		AK015571	0.0279174	5.3263	up	NRED	chr1	-	92767159	92767996
CUST_8171_PI419771968		AK016293	0.00482631	5.31331	up	NRED	chr4	+	3174696	3176265
CUST_7962_PI419771968		AK015597	0.00750242	5.30727	up	NRED	chr10	-	110272921	110333591
CUST_7983_PI419771968		AK015648	0.0306842	5.29227	up	NRED	chr8	+	118109291	118119052
CUST_8005_PI419771968		AK015734	0.0259778	5.28621	up	NRED	chr8	+	118294760	118295863
CUST_417_PI419771968		AK017009	0.000379	5.27408	up	Fantom_stringent	chr9	+	85642686	85644036
CUST_1010_PI419771968		AK080501	0.00447384	5.24125	up	Fantom_stringent	chr7	-	25872370	25873561
CUST_7830_PI419771968		AK015175	0.000494	5.23353	up	NRED	chr8	-	118705350	118711269
CUST_3343_PI419771968	AK080278	uc007wzq	0.00192968	5.22802	up	UCSC_knowngene	chr15	+	82729509	82736246
CUST_10563_PI419771968		AK042711	0.00120093	5.22664	up	NRED	chr7	-	119165416	119166928
CUST_11238_PI419771968		AK050225	4.16e-05	5.2243	up	NRED	chr9	+	95466996	95468354
CUST_13476_PI419771968	Gm7337	NR_003652	0.00963625	5.2228	up	RefSeq_NR	chr5	+	88279383	88282037
CUST_1222_PI419771968		AK131699	0.0250203	5.22192	up	Fantom_stringent	chr17	+	34996002	34996691
CUST_8294_PI419771968		AK016875	0.0103862	5.21859	up	NRED	chr6	+	85326195	85327901
CUST_1206_PI419771968		AK090142	0.0197202	5.1832	up	Fantom_stringent	chr9	-	54544442	54546234
CUST_3017_PI419771968	1700049E17Rik	uc007tcy	0.00872561	5.17069	up	UCSC_knowngene	chr14	+	43953568	43984544
CUST_920_PI419771968		AK077345	0.0070926	5.17066	up	Fantom_stringent	chr10	-	79130501	79132965
CUST_701_PI419771968		AK041029	0.00115141	5.16189	up	Fantom_stringent	chr5	-	31551746	31553565
CUST_7100_PI419771968		AK006816	0.00573041	5.15646	up	NRED	chr16	+	17047612	17049204
CUST_11592_PI419771968		AK053789	0.00113888	5.15423	up	NRED	chr17	+	25796435	25799767
CUST_7107_PI419771968		AK006836	0.0131092	5.15061	up	NRED	chr7	+	19843840	19845088
CUST_8764_PI419771968		AK019510	0.0202173	5.14206	up	NRED	chr14	+	31271221	31276465
CUST_12846_PI419771968		AK145034	0.00625256	5.11933	up	NRED	chr2	-	18609149	18611941
CUST_10060_PI419771968		AK036853	0.0219564	5.10773	up	NRED	chr12	-	111837992	111840173
CUST_8607_PI419771968		AK018199	0.00255551	5.10256	up	NRED	chr1	-	94804956	94807341
CUST_5287_PI419771968	art3	uc008ydj	0.00674484	5.09278	up	UCSC_knowngene	chr5	+	92834968	92843648
CUST_11667_PI419771968		AK076393	0.00208546	5.07919	up	NRED	chr1	-	193810716	193814002
CUST_7902_PI419771968		AK015416	0.0307553	5.06794	up	NRED	chr9	-	46135203	46136985
CUST_12986_PI419771968		AK165035	0.0398985	5.04654	up	NRED	chr9	-	46134475	46137496
CUST_6270_PI419771968	AK017076	uc009mua	0.023076	5.04318	up	UCSC_knowngene	chr8	-	94849936	94880019
CUST_8130_PI419771968		AK016146	0.0130165	5.02847	up	NRED	chr1	+	37671103	37672214
CUST_9624_PI419771968		AK032571	0.0106694	5.00564	up	NRED	chr3	-	157730153	157734522

## Sheet: Down-regulated
Probe ID	Gene Symbol	SeqID	p-value	FCAbsolute	Regulation	Source	Chromosome	ChromosomeStrand	txStart	txEnd
CUST_13475_PI419771968	H19	NR_001592	0.00337888	365.503	down	RefSeq_NR	chr7	-	149761436	149764051
CUST_9937_PI419771968		AK035610	0.000461	82.8576	down	NRED	chr13	+	16120652	16123187
CUST_5244_PI419771968	BC022590	uc008xov	0.020853	80.2215	down	UCSC_knowngene	chr5	-	66689963	66691004
CUST_13577_PI419771968	Gm6498	NR_003630	0.00182427	77.1381	down	RefSeq_NR	chr14	+	48818390	48848088
CUST_3470_PI419771968	AK149453	uc007ysq	0.00120067	75.8967	down	UCSC_knowngene	chr16	-	22875055	22894459
CUST_12998_PI419771968		AK166199	0.00012	67.8225	down	NRED	chr13	+	16122089	16123440
CUST_12201_PI419771968		AK083943	0.00133515	62.6236	down	NRED	chr8	-	32955571	32959506
CUST_10872_PI419771968		AK046232	0.00177882	61.8108	down	NRED	chr1	-	79854081	79855210
CUST_8449_PI419771968		AK017612	0.000619	56.8416	down	NRED	chr1	-	79835494	79836949
CUST_4662_PI419771968	AK031097	uc008pmi	0.00341871	50.5803	down	UCSC_knowngene	chr3	+	69358392	69364724
CUST_12009_PI419771968		AK081837	0.00378127	46.9663	down	NRED	chr16	-	74324565	74326059
CUST_9541_PI419771968		AK031521	0.000888	42.8921	down	NRED	chr4	-	81961648	81965801
CUST_11352_PI419771968		AK051797	7.1e-05	40.8309	down	NRED	chr17	+	12956198	12956881
CUST_6888_PI419771968		AK004447	0.0018936	40.5315	down	NRED	chr6	+	134879109	134901588
CUST_4919_PI419771968	D10920	uc008tfo	0.00155492	40.5102	down	UCSC_knowngene	chr4	+	62796041	62800121
CUST_9506_PI419771968		AK031302	0.00234596	39.9389	down	NRED	chrX	-	49906318	49909227
CUST_1766_PI419771968	Rab42	uc007cnr	0.00146506	39.7468	down	UCSC_knowngene	chr1	+	133585271	133612016
CUST_2685_PI419771968	AK157178(Meg3)	uc007pap	0.00149315	39.7092	down	UCSC_knowngene	chr12	+	110779213	110783529
CUST_2687_PI419771968	Meg3	uc007par	0.00753751	39.462	down	UCSC_knowngene	chr12	+	110779213	110809935
CUST_8583_PI419771968		AK018031	0.00139509	39.0932	down	NRED	chr14	-	66883365	66885021
CUST_578_PI419771968		AK031522	0.00161264	37.9023	down	Fantom_stringent	chr5	+	93601645	93604098
CUST_11472_PI419771968		AK052777	0.00498159	37.7251	down	NRED	chr12	-	120396505	120397436
CUST_13512_PI419771968	Airn	NR_002853	0.00714041	37.4443	down	RefSeq_NR	chr17	+	12934176	13008423
CUST_11202_PI419771968		AK049648	0.00196446	37.3115	down	NRED	chr17	-	63208868	63212588
CUST_11344_PI419771968		AK051693	0.000555	37.0865	down	NRED	chr4	+	18050134	18052524
CUST_5643_PI419771968	AK043032	uc009czd	0.00382298	36.8941	down	UCSC_knowngene	chr6	+	92766471	92793459
CUST_8922_PI419771968		AK020136	0.00194279	36.0353	down	NRED	chr2	+	59521787	59522846
CUST_12160_PI419771968		AK083529	0.000499	34.8659	down	NRED	chr17	-	48038175	48041244
CUST_12889_PI419771968		AK153559	0.00505722	34.7707	down	NRED	chr7	-	111459592	111463980
CUST_9110_PI419771968		AK020712	0.00159655	32.8119	down	NRED	chr1	+	57831262	57857282
CUST_119_PI419771968	Etd	NR_034074	0.0278874	32.4708	down	Fantom_stringent	chrX	+	50788134	50796748
CUST_267_PI419771968		AK011429	0.0022811	32.173	down	Fantom_stringent	chr6	-	127075183	127075994
CUST_8589_PI419771968		AK018053	5.54e-05	32.1003	down	NRED	chr1	-	21942183	21943539
CUST_7823_PI419771968		AK015151	0.00642517	31.1711	down	NRED	chr2	+	105001980	105002756
CUST_6800_PI419771968		uc009urr	0.000628	31.0486	down	UCSC_knowngene	chrX	-	151647681	151650952
CUST_9446_PI419771968		AK030418	1.1e-05	30.9927	down	NRED	chr17	-	63195381	63198758
CUST_7694_PI419771968		AK014550	0.0014965	30.9786	down	NRED	chr3	+	101938537	101941419
CUST_3190_PI419771968	B930095G15Rik	uc007vab	0.000361	30.7317	down	UCSC_knowngene	chr14	+	121646892	121650719
CUST_8675_PI419771968		AK018512	0.0114887	30.695	down	NRED	chr19	+	16242915	16244946
CUST_11664_PI419771968		AK076338	0.00597143	30.6635	down	NRED	chr7	-	80347660	80383417
CUST_1510_PI419771968		AK159300	0.00430526	30.6489	down	Fantom_stringent	chr11	+	94812953	94814354
CUST_4954_PI419771968	BC048947	uc008ttn	0.00584819	30.6444	down	UCSC_knowngene	chr4	-	97234565	97251320
CUST_6236_PI419771968	AK089914	uc009mjn	0.00154824	30.0006	down	UCSC_knowngene	chr8	-	85272179	85278951
CUST_9916_PI419771968		AK035407	0.0034643	29.4485	down	NRED	chr18	+	4924116	4926394
CUST_6874_PI419771968		AK004108	0.0173653	28.2677	down	NRED	chr8	+	109836576	109837937
CUST_3557_PI419771968	AK051166	uc007zsd	0.0151888	27.88	down	UCSC_knowngene	chr16	+	77236561	77363924
CUST_11923_PI419771968		AK080872	0.010068	27.7206	down	NRED	chr8	+	71404453	71408407
CUST_9582_PI419771968		AK032146	0.00361172	27.7093	down	NRED	chr17	-	63218193	63220849
CUST_8952_PI419771968		AK020229	0.00161239	27.1502	down	NRED	chr19	+	34266746	34267643
CUST_9754_PI419771968		AK034008	0.0112678	27.1429	down	NRED	chr14	-	93931176	93935906
CUST_7271_PI419771968		AK008743	0.0148927	27.1144	down	NRED	chr6	+	4869625	4870828
CUST_5216_PI419771968	AK090251	uc008xiv	0.000186	26.9868	down	UCSC_knowngene	chr5	-	45092114	45098129
CUST_13211_PI419771968		BC040515	0.0329211	26.9714	down	NRED	chr2	+	31803024	31804603
CUST_9886_PI419771968		AK035091	0.00582807	26.6643	down	NRED	chr1	+	43009742	43011992
CUST_10218_PI419771968		AK038304	0.000973	26.2104	down	NRED	chr17	-	67595315	67596860
CUST_10631_PI419771968		AK043471	0.000812	26.1027	down	NRED	chr14	+	121685910	121687349
CUST_3893_PI419771968	AK008288	uc008elz	0.00484037	26.0136	down	UCSC_knowngene	chr18	+	35342145	35342670
CUST_9065_PI419771968		AK020555	0.0084689	25.9638	down	NRED	chr6	-	87271551	87272333
CUST_1608_PI419771968	AK149000	uc007aev	0.00905902	25.9433	down	UCSC_knowngene	chr1	-	3638391	3648985
CUST_5218_PI419771968	AK080411	uc008xjc	0.0241356	25.6082	down	UCSC_knowngene	chr5	+	46029943	46036708
CUST_13146_PI419771968		BC024137	0.00334536	25.4118	down	NRED	chr8	+	116677306	116678639
CUST_80_PI419771968		AK004353	0.0013293	25.3876	down	Fantom_stringent	chr2	+	76244564	76245988
CUST_7601_PI419771968		AK013766	0.015274	25.3464	down	NRED	chr2	+	14624779	14626344
CUST_1653_PI419771968	BC029710	uc007axg	0.0303567	25.3016	down	UCSC_knowngene	chr1	+	50869288	50874545
CUST_5918_PI419771968	AK014683	uc009hiz	0.0100911	25.2703	down	UCSC_knowngene	chr7	-	74929610	74948382
CUST_7492_PI419771968		AK012924	0.00325646	25.149	down	NRED	chr6	-	117094342	117095187
CUST_13268_PI419771968		BC055305	0.00546331	24.3344	down	NRED	chr10	-	36857329	36858715
CUST_11740_PI419771968		AK077955	0.00525011	24.2643	down	NRED	chr11	+	3201788	3204468
CUST_579_PI419771968		AK031656	0.000646	23.9582	down	Fantom_stringent	chr16	+	85900993	85904237
CUST_1549_PI419771968		AK164377	0.00840539	23.8786	down	Fantom_stringent	chr14	-	121683409	121686334
CUST_4040_PI419771968	AK036616	uc008gmk	0.0058838	23.8026	down	UCSC_knowngene	chr19	+	8797976	8800931
CUST_6251_PI419771968	Dnase2a	uc009moc	0.0220872	23.7217	down	UCSC_knowngene	chr8	+	87435234	87446814
CUST_5022_PI419771968	AK031234	uc008uub	0.00482935	23.5982	down	UCSC_knowngene	chr4	+	126712887	126726642
CUST_8915_PI419771968		AK020112	0.00603816	23.3429	down	NRED	chr5	+	15475759	15476863
CUST_12556_PI419771968		AK089213	0.000644	23.31	down	NRED	chr10	+	83903593	83907119
CUST_5904_PI419771968	AK083195	uc009hfc	0.0160409	23.3018	down	UCSC_knowngene	chr7	-	69088786	69127242
CUST_1595_PI419771968		AK171786	0.00882944	23.2239	down	Fantom_stringent	chr18	-	73971733	73975100
CUST_10268_PI419771968		AK038829	0.00802991	23.1874	down	NRED	chr3	-	51861206	51864629
CUST_13052_PI419771968		AF061179	0.0198129	22.8712	down	NRED	chr18	-	75746231	75747219
CUST_9976_PI419771968		AK035973	0.000595	22.811	down	NRED	chr11	+	44553229	44555756
CUST_12736_PI419771968		AK138072	0.00189235	22.6818	down	NRED	chr6	+	134897963	134902429
CUST_9376_PI419771968		AK029270	0.00171397	22.6775	down	NRED	chr2	+	169595501	169598664
CUST_10821_PI419771968		AK045553	0.0087513	22.6076	down	NRED	chr14	-	31997010	31999329
CUST_10207_PI419771968		AK038224	0.00555631	22.4625	down	NRED	chr15	+	85507171	85511265
CUST_11433_PI419771968		AK052483	0.00482202	22.4419	down	NRED	chr17	-	63148082	63152573
CUST_876_PI419771968		AK053256	0.00349051	22.169	down	Fantom_stringent	chr12	-	80057918	80061202
CUST_9316_PI419771968		AK028267	4.59e-06	22.0637	down	NRED	chr8	+	81552119	81552364
CUST_10703_PI419771968		AK044114	0.000897	21.7917	down	NRED	chr4	-	77852983	77857595
CUST_11302_PI419771968		AK051309	0.00549979	21.7721	down	NRED	chr11	+	44605903	44607782
CUST_12589_PI419771968		AK089646	0.00318774	21.688	down	NRED	chr3	-	100877858	100882644
CUST_9113_PI419771968		AK020726	0.00328666	21.5049	down	NRED	chr18	-	77968421	77972209
CUST_9656_PI419771968		AK032934	0.000832	21.3367	down	NRED	chr11	-	74974881	74978009
CUST_13552_PI419771968	Meg3	NR_003633	0.000527	21.0794	down	RefSeq_NR	chr12	+	110783607	110806810
CUST_11730_PI419771968		AK077891	0.00761473	21.0019	down	NRED	chr19	-	17647852	17650295
CUST_8945_PI419771968		AK020212	0.0214786	20.9359	down	NRED	chr12	-	120404354	120405227
CUST_5905_PI419771968	AK035901	uc009hfd	0.00084	20.8436	down	UCSC_knowngene	chr7	-	69117827	69127242
CUST_10973_PI419771968		AK047377	0.00767492	20.7979	down	NRED	chr1	-	108594400	108597146
CUST_7349_PI419771968		AK009920	0.0201666	20.629	down	NRED	chr1	-	38611129	38613222
CUST_12462_PI419771968		AK087080	0.004678	20.5318	down	NRED	chr10	+	27955225	27956846
CUST_3406_PI419771968	AK038079	uc007xss	0.000905	20.2379	down	UCSC_knowngene	chr15	-	101051626	101054552
CUST_6730_PI419771968	AY512909	uc009tie	0.000247	20.1061	down	UCSC_knowngene	chrX	+	57736773	58061168
CUST_2508_PI419771968	AK164256	uc007msb	0.00470583	20.0372	down	UCSC_knowngene	chr11	-	120046713	120051170
CUST_8386_PI419771968		AK017264	0.0246273	19.9785	down	NRED	chr16	-	45763783	45765934
CUST_8497_PI419771968		BC002245	4.03e-05	19.8736	down	NRED	chr15	+	77562149	77563376
CUST_12975_PI419771968		AK164022	0.005826	19.7509	down	NRED	chr2	+	79097838	79100144
CUST_12125_PI419771968		AK083074	0.00295196	19.7091	down	NRED	chr5	-	66983700	66986809
CUST_8601_PI419771968		AK018162	0.0005	19.5548	down	NRED	chr18	+	12088283	12090885
CUST_9278_PI419771968		AK021307	0.0064922	19.0039	down	NRED	chr14	-	100548377	100683606
CUST_11631_PI419771968		AK054342	0.00275192	18.9936	down	NRED	chr13	+	94827786	94893929
CUST_7403_PI419771968		AK011385	0.0189925	18.9645	down	NRED	chr1	-	137376968	137377991
CUST_5497_PI419771968	AK158055	uc009bio	0.011424	18.9004	down	UCSC_knowngene	chr6	+	35202731	35211997
CUST_7395_PI419771968		AK011250	0.00420759	18.8859	down	NRED	chr11	-	18905609	18906476
CUST_9354_PI419771968		AK028958	0.00151244	18.8823	down	NRED	chr13	+	38475735	38478901
CUST_12496_PI419771968		AK087429	0.00232117	18.6708	down	NRED	chr16	+	37791794	37794628
CUST_9016_PI419771968		AK020430	0.00281725	18.5142	down	NRED	chr2	+	162486898	162492845
CUST_545_PI419771968		AK028635	0.00391944	18.4588	down	Fantom_stringent	chr4	+	62797133	62800460
CUST_6762_PI419771968	BC019699	uc009uam	0.019737	18.3658	down	UCSC_knowngene	chrX	-	102232688	102265435
CUST_2424_PI419771968	AK088966	uc007lmk	6.64e-05	18.1976	down	UCSC_knowngene	chr11	-	100682021	100684248
CUST_8653_PI419771968		AK018425	0.0163099	18.1286	down	NRED	chr15	-	7326749	7328054
CUST_871_PI419771968		AK053029	0.00461572	18.0143	down	Fantom_stringent	chr11	+	98630309	98634716
CUST_12949_PI419771968		AK162474	6.95e-05	17.9925	down	NRED	chr11	-	120049275	120051199
CUST_1895_PI419771968	AK145301	uc007edt	0.00443128	17.9799	down	UCSC_knowngene	chr1	+	194681121	194682440
CUST_2175_PI419771968	AK177174	uc007hso	0.00671063	17.8688	down	UCSC_knowngene	chr11	+	3208804	3209075
CUST_12687_PI419771968		AK134354	0.00367857	17.7702	down	NRED	chr6	-	128291370	128294993
CUST_6754_PI419771968	AK033245	uc009tyf	0.0118649	17.6682	down	UCSC_knowngene	chrX	+	98989994	98993979
CUST_3644_PI419771968	Airn	uc008ala	0.000279	17.5753	down	UCSC_knowngene	chr17	+	12934239	13023201
CUST_11729_PI419771968		AK077887	0.000845	17.5529	down	NRED	chr17	-	63156921	63159447
CUST_8994_PI419771968		AK020385	0.0122655	17.4511	down	NRED	chr5	-	132069681	132070781
CUST_307_PI419771968		AK012942	0.00965835	17.4008	down	Fantom_stringent	chr17	+	12934239	13008423
CUST_10452_PI419771968		AK041222	0.00181468	17.1425	down	NRED	chr1	-	38474548	38478181
CUST_1081_PI419771968		AK084186	0.00946168	17.1296	down	Fantom_stringent	chr2	+	35030767	35034331
CUST_10992_PI419771968		AK047541	0.00318714	17.068	down	NRED	chr2	-	126671200	126681020
CUST_10802_PI419771968		AK045293	0.00839106	16.9301	down	NRED	chr1	-	68947593	68949747
CUST_9440_PI419771968		AK030367	0.000835	16.9254	down	NRED	chr2	+	124442004	124444651
CUST_13060_PI419771968		AF177020	0.000135	16.9161	down	NRED	chr6	+	30758295	30758716
CUST_5503_PI419771968	AK082250	uc009bjd	0.000275	16.9157	down	UCSC_knowngene	chr6	-	37046675	37047626
CUST_8401_PI419771968		AK017369	0.000735	16.8452	down	NRED	chr2	+	16675374	16677465
CUST_4211_PI419771968	AK018352	uc008imv	0.00172268	16.83	down	UCSC_knowngene	chr2	+	20679165	20681278
CUST_11222_PI419771968		AK049981	0.00197574	16.7787	down	NRED	chr9	-	97649751	97653268
CUST_12188_PI419771968		AK083863	0.00124108	16.6206	down	NRED	chr4	+	97569249	97572379
CUST_5424_PI419771968	BC028660	uc009adp	0.0303245	16.6027	down	UCSC_knowngene	chr5	-	138126383	138131979
CUST_714_PI419771968		AK041843	0.0040181	16.5195	down	Fantom_stringent	chr13	-	67206316	67209540
CUST_9769_PI419771968		AK034169	0.00222903	16.4271	down	NRED	chr12	-	85393456	85395204
CUST_8482_PI419771968		AK017909	0.00435853	16.3027	down	NRED	chr10	-	9342744	9344647
CUST_9872_PI419771968		AK035003	0.00251044	16.2836	down	NRED	chr2	-	63906561	63908260
CUST_10198_PI419771968		AK038166	0.0186137	16.2473	down	NRED	chr2	-	165976115	165979246
CUST_9340_PI419771968		AK028812	0.00167858	16.1994	down	NRED	chr15	+	11266182	11278986
CUST_8380_PI419771968		AK017233	0.000731	16.1685	down	NRED	chr1	-	38304779	38306115
CUST_7574_PI419771968		AK013628	0.0302383	16.1572	down	NRED	chr18	-	75629129	75630437
CUST_10008_PI419771968		AK036213	0.00374346	16.1232	down	NRED	chr11	-	36481690	36485569
CUST_12314_PI419771968		AK085324	0.000854	16.1213	down	NRED	chr9	+	118574653	118576612
CUST_11829_PI419771968		AK079369	0.02703	16.1164	down	NRED	chr11	+	3200666	3203971
CUST_11157_PI419771968		AK048940	0.00231883	16.0051	down	NRED	chr7	+	114661045	114663063
CUST_10786_PI419771968		AK045146	0.019177	15.8639	down	NRED	chr2	-	140492963	140497184
CUST_6788_PI419771968	AK090061	uc009ulf	0.00225642	15.8046	down	UCSC_knowngene	chrX	+	137310776	137331419
CUST_7569_PI419771968		AK013604	0.00577321	15.7593	down	NRED	chr8	-	9688331	9690276
CUST_2688_PI419771968	AK147321	uc007pas	0.0151408	15.6821	down	UCSC_knowngene	chr12	+	110780232	110799917
CUST_10304_PI419771968		AK039302	0.0119524	15.6532	down	NRED	chr13	+	14140980	14160778
CUST_1562_PI419771968		AK165856	0.0496686	15.5843	down	Fantom_stringent	chr5	+	31916344	31957234
CUST_11569_PI419771968		AK053547	0.000279	15.5203	down	NRED	chr11	+	110260435	110261743
CUST_12248_PI419771968		AK084616	0.000502	15.4608	down	NRED	chr11	+	44549546	44553501
CUST_11341_PI419771968		AK051651	0.00101303	15.4443	down	NRED	chr7	+	77509795	77513505
CUST_7670_PI419771968		AK014219	0.000843	15.4391	down	NRED	chr6	+	30758582	30758830
CUST_9271_PI419771968		AK021285	0.00235886	15.4293	down	NRED	chr16	-	4592921	4594230
CUST_6857_PI419771968		AK003497	0.0225509	15.4243	down	NRED	chr7	+	123175492	123176064
CUST_5783_PI419771968	AK083498	uc009fcv	0.015263	15.4082	down	UCSC_knowngene	chr7	+	9314989	9322997
CUST_8463_PI419771968		AK017720	0.0153527	15.2735	down	NRED	chr1	+	91035098	91036488
CUST_4603_PI419771968	Hltf	uc008osm	0.0334823	15.2487	down	UCSC_knowngene	chr3	+	19958290	20018362
CUST_9459_PI419771968		AK030592	0.00112512	15.2323	down	NRED	chr11	-	88333600	88336661
CUST_9935_PI419771968		AK035600	0.000386	15.2193	down	NRED	chr6	+	29298139	29299727
CUST_665_PI419771968		AK038520	0.000796	15.2088	down	Fantom_stringent	chr1	-	64076036	64079501
CUST_11448_PI419771968		AK052577	0.00266698	15.1916	down	NRED	chr1	-	64160755	64164800
CUST_8399_PI419771968		AK017366	0.00583456	15.1654	down	NRED	chr14	+	55065154	55066698
CUST_9803_PI419771968		AK034379	0.00892478	15.1367	down	NRED	chr1	+	181917039	181919441
CUST_619_PI419771968		AK033993	0.00636115	15.1038	down	Fantom_stringent	chr17	-	21665159	21672842
CUST_9698_PI419771968		AK033270	0.00175508	15.0549	down	NRED	chr10	-	5674656	5734545
CUST_9593_PI419771968		AK032296	0.00285006	15.0117	down	NRED	chr17	-	81904512	81909049
CUST_9507_PI419771968		AK031304	0.00932453	14.9794	down	NRED	chrX	-	91445600	91447813
CUST_13039_PI419771968	Rian	AB063319	0.0135936	14.9194	down	NRED	chr12	+	110884371	110890438
CUST_12698_PI419771968		AK135255	0.00981605	14.9097	down	NRED	chr11	-	11859614	11863548
CUST_11495_PI419771968		AK053007	0.000827	14.8893	down	NRED	chr4	-	76081246	76083868
CUST_718_PI419771968		AK042106	0.0111277	14.8405	down	Fantom_stringent	chr1	-	58471439	58473773
CUST_2763_PI419771968	AK020728	uc007pyl	0.0025306	14.8152	down	UCSC_knowngene	chr13	+	29108161	29120666
CUST_685_PI419771968		AK040017	0.0018976	14.8107	down	Fantom_stringent	chr3	+	106856386	106857261
CUST_10105_PI419771968		AK037356	0.0083968	14.7471	down	NRED	chr8	+	119781978	119784698
CUST_6439_PI419771968	AK011865	uc009pak	0.00399529	14.7001	down	UCSC_knowngene	chr9	+	41388823	41400570
CUST_11211_PI419771968		AK049777	0.00139398	14.6376	down	NRED	chr7	+	144166127	144169344
CUST_12538_PI419771968		AK088570	0.00409435	14.6163	down	NRED	chr12	-	52729396	52732389
CUST_12027_PI419771968		AK082089	0.000501	14.6042	down	NRED	chr14	-	75162252	75163946
CUST_6870_PI419771968		AK003932	0.0265848	14.5772	down	NRED	chr7	-	63228888	63230212
CUST_5550_PI419771968	Osbpl3	uc009bxa	0.00110341	14.5706	down	UCSC_knowngene	chr6	-	50250212	50332836
CUST_12979_PI419771968		AK164363	0.0349394	14.5387	down	NRED	chr4	+	97249005	97251908
CUST_12780_PI419771968		AK140807	0.00016	14.5108	down	NRED	chr11	+	44469289	44473606
CUST_7731_PI419771968		AK014755	0.000495	14.4085	down	NRED	chr6	+	34659489	34660753
CUST_1599_PI419771968		AK172057	0.0109092	14.3832	down	Fantom_stringent	chr16	-	43965149	43973580
CUST_11018_PI419771968		AK047747	0.0048202	14.3767	down	NRED	chr6	-	37218230	37219939
CUST_10619_PI419771968		AK043397	0.00173922	14.3326	down	NRED	chr2	-	63854825	63856582
CUST_1564_PI419771968		AK166173	0.0127806	14.284	down	Fantom_stringent	chr6	-	39102909	39105410
CUST_5162_PI419771968	AK002390	uc008wqt	0.00335115	14.2764	down	UCSC_knowngene	chr5	+	23356414	23360742
CUST_2984_PI419771968	AK043847	uc007smc	0.00203572	14.2477	down	UCSC_knowngene	chr14	-	24111514	24112865
CUST_3642_PI419771968	AK029100	uc008akr	0.0110461	14.2469	down	UCSC_knowngene	chr17	+	12511750	12520116
CUST_94_PI419771968		AK005410	0.0201596	14.1847	down	Fantom_stringent	chr15	-	37161675	37162896
CUST_11518_PI419771968		AK053161	0.00156539	14.1772	down	NRED	chr10	-	94343944	94346426
CUST_6636_PI419771968	AK086087	uc009rze	0.00567679	14.0688	down	UCSC_knowngene	chr9	+	117161653	117163814
CUST_9651_PI419771968		AK032904	0.000558	14.0446	down	NRED	chr6	+	134137563	134141228
CUST_8425_PI419771968		AK017498	0.00707369	13.9972	down	NRED	chr14	+	118302356	118304209
CUST_9073_PI419771968		AK020576	0.0495471	13.997	down	NRED	chr6	+	92890571	93061460
CUST_13003_PI419771968		AK169946	0.00274659	13.9399	down	NRED	chr2	-	35051499	35056502
CUST_13463_PI419771968	6430411K18Rik	NR_002848	0.0412503	13.8785	down	RefSeq_NR	chr12	+	110829746	110831063
CUST_5219_PI419771968	AK044526	uc008xjd	0.00200675	13.8568	down	UCSC_knowngene	chr5	+	46030620	46035330
CUST_4034_PI419771968	Rasgrp2	uc008giq	8.04e-05	13.8557	down	UCSC_knowngene	chr19	+	6403023	6403638
CUST_5502_PI419771968	Ptn	uc009biz	0.000529	13.8428	down	UCSC_knowngene	chr6	-	36664928	36665534
CUST_8735_PI419771968		AK019103	0.00165748	13.7712	down	NRED	chr3	-	41326125	41332396
CUST_9260_PI419771968		AK021240	0.00287045	13.7603	down	NRED	chr18	+	10327893	10328800
CUST_11161_PI419771968		AK048959	0.00186791	13.7366	down	NRED	chr17	-	51896620	51901147
CUST_9036_PI419771968		AK020501	0.00390284	13.6921	down	NRED	chrX	-	56345816	56347045
CUST_7471_PI419771968		AK012483	0.0283803	13.6617	down	NRED	chrX	-	50409369	50410367
CUST_8515_PI419771968		BC023710	0.00135733	13.6547	down	NRED	chr1	-	170349765	170353073
CUST_9439_PI419771968		AK030345	0.00036	13.6472	down	NRED	chr2	+	52725677	52729381
CUST_12280_PI419771968		AK084995	0.0128393	13.5791	down	NRED	chr7	+	37512195	37514581
CUST_12876_PI419771968		AK149068	0.00409728	13.5609	down	NRED	chr2	-	75520476	75522078
CUST_2595_PI419771968	Mdga2	uc007nro	0.000876	13.5451	down	UCSC_knowngene	chr12	-	68313516	68322190
CUST_12155_PI419771968		AK083489	0.00574149	13.5263	down	NRED	chr7	+	75253950	75258241
CUST_1289_PI419771968		AK137112	0.00534887	13.4983	down	Fantom_stringent	chr13	-	15551818	15553128
CUST_7451_PI419771968		AK012089	0.015786	13.4691	down	NRED	chrX	-	11659671	11660237
CUST_12480_PI419771968		AK087259	0.00547795	13.4601	down	NRED	chr9	+	69301502	69302617
CUST_8702_PI419771968		AK018648	0.00537735	13.4461	down	NRED	chr12	-	103911226	103965543
CUST_12106_PI419771968		AK082703	0.00165203	13.3979	down	NRED	chr7	+	137836116	137838364
CUST_7542_PI419771968		AK013488	0.00418944	13.3894	down	NRED	chr11	-	90217875	90219144
CUST_11489_PI419771968		AK052957	0.00038	13.2369	down	NRED	chr2	-	84679007	84680490
CUST_1835_PI419771968	AK020768	uc007djl	0.0103972	13.1867	down	UCSC_knowngene	chr1	-	167634652	167639863
CUST_10238_PI419771968		AK038503	0.00179091	13.1803	down	NRED	chr11	-	46809501	46812231
CUST_2597_PI419771968	AK138088	uc007nsp	0.00682761	13.169	down	UCSC_knowngene	chr12	-	70695392	70697803
CUST_5440_PI419771968	AK164124	uc009aml	0.0470016	13.1033	down	UCSC_knowngene	chr5	-	145950296	145952411
CUST_9557_PI419771968		AK031752	0.00254745	13.082	down	NRED	chr10	+	27794710	27797074
CUST_1677_PI419771968	AK079804	uc007bcl	0.00185708	13.064	down	UCSC_knowngene	chr1	+	58709484	58712675
CUST_13626_PI419771968	Zf12	NR_003547	0.00140881	13.0432	down	RefSeq_NR	chrX_random	+	268798	270075
CUST_10525_PI419771968		AK042238	0.00567546	13.0352	down	NRED	chr4	+	3502043	3503929
CUST_1947_PI419771968	AK033378	uc007epr	0.00163643	13.0276	down	UCSC_knowngene	chr10	+	22535554	22543136
CUST_9266_PI419771968		AK021264	0.00257554	12.9848	down	NRED	chr8	+	109859540	109860371
CUST_7503_PI419771968		AK013025	0.00513633	12.9447	down	NRED	chr6	-	42641998	42643013
CUST_873_PI419771968		AK053132	0.00122321	12.8678	down	Fantom_stringent	chr1	-	82445003	82446218
CUST_6883_PI419771968		AK004333	0.000888	12.7844	down	NRED	chr18	+	35716959	35717539
CUST_13277_PI419771968		BC059079	0.00127896	12.7795	down	NRED	chr4	+	62795576	62799834
CUST_9638_PI419771968		AK032719	0.00278496	12.7289	down	NRED	chr9	+	68824287	68826467
CUST_9897_PI419771968		AK035243	0.0213435	12.7184	down	NRED	chr13	+	105230043	105232366
CUST_7336_PI419771968		AK009626	0.00627851	12.7131	down	NRED	chr7	+	91033420	91033703
CUST_6085_PI419771968	AK144366	uc009kgh	0.00208902	12.6874	down	UCSC_knowngene	chr7	-	147142903	147143938
CUST_2162_PI419771968	AK163775	uc007hna	0.00938742	12.6415	down	UCSC_knowngene	chr10	+	127912120	127914536
CUST_12657_PI419771968		AK132411	0.00137545	12.6173	down	NRED	chr2	-	59860433	59864168
CUST_9628_PI419771968		AK032615	0.00528381	12.5955	down	NRED	chr1	-	52517762	52520534
CUST_892_PI419771968		AK054540	0.0111363	12.4977	down	Fantom_stringent	chr3	-	83964362	83967953
CUST_10538_PI419771968		AK042360	0.000681	12.4828	down	NRED	chr3	+	126481085	126487689
CUST_12506_PI419771968		AK087671	0.00520437	12.4758	down	NRED	chr8	-	80032594	80035554
CUST_9606_PI419771968		AK032419	0.00347801	12.4589	down	NRED	chr9	+	13349094	13352732
CUST_11756_PI419771968		AK078200	0.00204944	12.4384	down	NRED	chr9	-	49489320	49491690
CUST_10830_PI419771968		AK045630	0.0352085	12.4012	down	NRED	chr15	+	89355200	89358900
CUST_11014_PI419771968		AK047699	0.0018209	12.3896	down	NRED	chr3	-	25675829	25677795
CUST_7646_PI419771968		AK014066	0.0139398	12.3589	down	NRED	chr6	+	119798210	119799031
CUST_12402_PI419771968		AK086405	0.0281594	12.3522	down	NRED	chr2	-	59873161	59876561
CUST_10762_PI419771968		AK044907	0.0070397	12.3472	down	NRED	chr8	+	93889567	93891165
CUST_8904_PI419771968		AK020076	0.00345815	12.3456	down	NRED	chr16	-	76351833	76373294
CUST_7642_PI419771968		AK014037	0.0109653	12.3156	down	NRED	chr1	-	140725742	140727134
CUST_10918_PI419771968		AK046833	0.00186808	12.2769	down	NRED	chr8	-	9474128	9478493
CUST_7555_PI419771968		AK013552	0.012454	12.2674	down	NRED	chr11	-	18788263	18789843
CUST_5106_PI419771968	AK083203	uc008wbz	0.0350381	12.2244	down	UCSC_knowngene	chr4	+	154011684	154018825
CUST_10705_PI419771968		AK044131	0.00074	12.2023	down	NRED	chr3	-	51804657	51807947
CUST_11105_PI419771968		AK048477	0.0119709	12.1906	down	NRED	chr7	+	117173579	117177738
CUST_7732_PI419771968		AK014756	0.000338	12.1813	down	NRED	chr16	+	23294137	23295225
CUST_12095_PI419771968		AK082632	0.000696	12.1647	down	NRED	chr1	+	51205152	51206337
CUST_9265_PI419771968		AK021262	0.0253061	12.1469	down	NRED	chrX	-	50408222	50410367
CUST_8475_PI419771968		AK017864	0.00288181	12.0832	down	NRED	chrX	+	7274302	7275242
CUST_1054_PI419771968		AK082723	0.000871	12.0787	down	Fantom_stringent	chr10	+	61246044	61247568
CUST_10860_PI419771968		AK046037	0.0171398	12.0255	down	NRED	chr14	+	87833226	87834833
CUST_2761_PI419771968	BC025054	uc007pyi	0.00176513	12.0061	down	UCSC_knowngene	chr13	-	28551902	28975446
CUST_12310_PI419771968		AK085278	0.0094745	11.9811	down	NRED	chr2	-	127095193	127095768
CUST_9699_PI419771968		AK033273	0.000145	11.9419	down	NRED	chr12	-	51450943	51453145
CUST_9372_PI419771968		AK029232	0.00240361	11.9243	down	NRED	chr4	+	100825986	100829372
CUST_10262_PI419771968		AK038787	0.00140026	11.8936	down	NRED	chr16	+	72866640	72869027
CUST_3643_PI419771968	AK021075	uc008akv	0.00382695	11.8716	down	UCSC_knowngene	chr17	+	12659709	12672247
CUST_11511_PI419771968		AK053118	0.00614357	11.8567	down	NRED	chr3	-	95079406	95087323
CUST_6719_PI419771968	AK081581	uc009tdo	0.000152	11.8054	down	UCSC_knowngene	chrX	-	47911314	47923468
CUST_11261_PI419771968		AK050726	0.00223253	11.7767	down	NRED	chr6	+	21992664	21995190
CUST_11369_PI419771968		AK051886	0.000827	11.7662	down	NRED	chr14	+	27864001	27865451
CUST_8693_PI419771968		AK018604	2.66e-05	11.7405	down	NRED	chr19	-	40549088	40551029
CUST_10987_PI419771968		AK047489	0.00071	11.6951	down	NRED	chr12	-	100530817	100534830
CUST_11783_PI419771968		AK078589	0.00107526	11.6499	down	NRED	chr5	+	17080583	17083996
CUST_7392_PI419771968		AK011210	0.00156631	11.5971	down	NRED	chr2	+	75153203	75154477
CUST_3737_PI419771968	AK003073	uc008cem	0.00825831	11.5733	down	UCSC_knowngene	chr17	-	35088689	35089413
CUST_12869_PI419771968		AK148658	0.00928217	11.5731	down	NRED	chr15	-	26672986	26675892
CUST_12905_PI419771968		AK156552	0.00515748	11.5697	down	NRED	chrX	+	155972416	155976461
CUST_781_PI419771968		AK046686	0.00529403	11.5599	down	Fantom_stringent	chr6	+	100757444	100760905
CUST_3966_PI419771968	AK087569	uc008fmb	0.00964671	11.4956	down	UCSC_knowngene	chr18	-	67480862	67503757
CUST_8460_PI419771968		AK017702	0.0417685	11.4778	down	NRED	chr1	-	196952108	196957727
CUST_6761_PI419771968	AK043766	uc009ual	0.00320884	11.4734	down	UCSC_knowngene	chrX	-	102232688	102265435
CUST_6313_PI419771968	AK083706	uc009nie	0.0125499	11.4469	down	UCSC_knowngene	chr8	+	111599121	111777539
CUST_5042_PI419771968	AK199358	uc008vch	0.0032014	11.4209	down	UCSC_knowngene	chr4	+	132753316	132755300
CUST_2350_PI419771968	AK135766	uc007koh	0.00017	11.3912	down	UCSC_knowngene	chr11	-	82879253	82884748
CUST_6798_PI419771968	AK035460	uc009uqr	0.0112384	11.3758	down	UCSC_knowngene	chrX	+	149472171	149507458
CUST_2382_PI419771968	Paqr11	uc007kwn	0.00166887	11.367	down	UCSC_knowngene	chr11	+	90048996	90112570
CUST_4181_PI419771968	Phxr1	uc008iec	0.00169116	11.3656	down	UCSC_knowngene	chr2	+	3349139	3349418
CUST_4406_PI419771968	AK039958	uc008ltq	0.00694551	11.3523	down	UCSC_knowngene	chr2	-	119146934	119151933
CUST_11322_PI419771968		AK051469	0.00111025	11.3482	down	NRED	chr8	+	109885471	109887297
CUST_2679_PI419771968	BC078436	uc007oyk	0.00280571	11.34	down	UCSC_knowngene	chr12	+	106726184	106731305
CUST_10643_PI419771968		AK043575	0.00375452	11.3385	down	NRED	chr14	+	55572562	55573802
CUST_3774_PI419771968	AK088368	uc008czh	0.00124223	11.3114	down	UCSC_knowngene	chr17	-	51884853	51888009
CUST_7482_PI419771968		AK012752	0.000179	11.2711	down	NRED	chr4	+	130265588	130266405
CUST_9529_PI419771968		AK031434	0.00428467	11.2571	down	NRED	chr1	-	36970445	36973384
CUST_13113_PI419771968		BC006792	0.000127	11.2522	down	NRED	chr6	-	37277254	37279696
CUST_11190_PI419771968		AK049415	0.000307	11.2483	down	NRED	chr7	-	82913925	82916932
CUST_4864_PI419771968	AK040948	uc008scb	0.000423	11.2204	down	UCSC_knowngene	chr4	+	19529539	19532517
CUST_5644_PI419771968	AK044653	uc009czg	0.000501	11.2009	down	UCSC_knowngene	chr6	+	92890362	93222971
CUST_13403_PI419771968		X07808	0.00446807	11.1903	down	NRED	chr7	-	97113513	97113901
CUST_11893_PI419771968		AK080436	0.0151883	11.1507	down	NRED	chr16	-	96346925	96348629
CUST_10882_PI419771968		AK046449	0.00832234	11.1311	down	NRED	chr3	+	132501780	132504545
CUST_10734_PI419771968		AK044510	0.00226479	11.1096	down	NRED	chr17	+	68153659	68155821
CUST_5748_PI419771968	Rassf8	uc009ers	0.00174551	11.098	down	UCSC_knowngene	chr6	+	145768009	145769599
CUST_8580_PI419771968		AK018017	0.00237624	11.0907	down	NRED	chr8	+	84041822	84043067
CUST_12197_PI419771968		AK083892	0.00274749	10.9728	down	NRED	chr6	-	101235819	101238504
CUST_2407_PI419771968	AK010368	uc007lef	0.00371772	10.9663	down	UCSC_knowngene	chr11	+	97459824	97484207
CUST_7282_PI419771968		AK008862	0.0161193	10.9516	down	NRED	chr10	+	37779351	37783162
CUST_844_PI419771968		AK050761	0.00786181	10.9269	down	Fantom_stringent	chr1	-	34866205	34868753
CUST_8763_PI419771968		AK019501	0.0116892	10.9022	down	NRED	chr9	+	122036411	122039132
CUST_1606_PI419771968		AK172723	0.0146253	10.8972	down	Fantom_stringent	chr9	+	79966701	79969744
CUST_8859_PI419771968		AK019848	0.00123294	10.8781	down	NRED	chr14	-	26406032	26413422
CUST_2840_PI419771968	Ptch1	uc007qxu	0.000293	10.8699	down	UCSC_knowngene	chr13	-	63609643	63615649
CUST_9655_PI419771968		AK032929	0.00150497	10.8295	down	NRED	chr3	-	78963624	78967498
CUST_11313_PI419771968		AK051400	0.000585	10.8292	down	NRED	chr15	-	50557186	50559915
CUST_1058_PI419771968		AK082938	0.000831	10.8011	down	Fantom_stringent	chr1	-	173931091	173932524
CUST_10532_PI419771968		AK042305	0.00447334	10.7406	down	NRED	chr17	+	47498212	47498903
CUST_7563_PI419771968		AK013579	0.0028179	10.6909	down	NRED	chr5	-	22910094	22910891
CUST_10343_PI419771968		AK039696	0.000577	10.6799	down	NRED	chr16	+	23300396	23301779
CUST_6209_PI419771968	AK162599	uc009lxf	0.0056235	10.6737	down	UCSC_knowngene	chr8	-	71904238	71919427
CUST_11645_PI419771968		AK054505	0.000318	10.6707	down	NRED	chr13	+	83761110	83764562
CUST_10459_PI419771968		AK041313	0.00255812	10.6586	down	NRED	chr19	-	47200639	47202971
CUST_196_PI419771968		AK008669	0.00601249	10.6388	down	Fantom_stringent	chr11	+	77303355	77304911
CUST_12434_PI419771968		AK086698	0.0402387	10.6209	down	NRED	chr12	+	25578307	25581014
CUST_823_PI419771968		AK049712	0.0474321	10.602	down	Fantom_stringent	chr3	-	18522161	18526141
CUST_1697_PI419771968	AK049041	uc007bkf	0.00529796	10.6007	down	UCSC_knowngene	chr1	+	71699730	71709417
CUST_2397_PI419771968	AK078606	uc007lbl	0.000196	10.5931	down	UCSC_knowngene	chr11	+	96064767	96066699
CUST_5975_PI419771968	AK205936	uc009iln	0.0224841	10.5528	down	UCSC_knowngene	chr7	+	106493895	106494154
CUST_9611_PI419771968		AK032444	0.0113546	10.5481	down	NRED	chr10	-	108336487	108446156
CUST_1864_PI419771968	BC033430	uc007dva	0.0144013	10.5237	down	UCSC_knowngene	chr1	-	180252296	180254096
CUST_13315_PI419771968		BC094579	0.000796	10.5041	down	NRED	chr6	-	118537257	118542312
CUST_5754_PI419771968	AK050809	uc009euf	0.0488566	10.4651	down	UCSC_knowngene	chr6	+	149357407	149360658
CUST_11583_PI419771968		AK053683	0.00274835	10.4333	down	NRED	chr8	-	74887806	74891802
CUST_5672_PI419771968	AK076253	uc009dih	0.00381571	10.4189	down	UCSC_knowngene	chr6	-	114851924	114855164
CUST_1801_PI419771968	1700025G04Rik	uc007czd	0.00420529	10.4095	down	UCSC_knowngene	chr1	-	153699532	153937229
CUST_11896_PI419771968		AK080477	0.0109754	10.398	down	NRED	chr4	+	104871912	104873525
CUST_9959_PI419771968		AK035834	0.000891	10.391	down	NRED	chr17	-	66719978	66721766
CUST_13098_PI419771968		AY039009	0.00344469	10.3603	down	NRED	chr2	-	44929031	44935120
CUST_2556_PI419771968	AK132630	uc007nec	0.00420799	10.3552	down	UCSC_knowngene	chr12	+	22811250	22888976
CUST_8434_PI419771968		AK017535	0.0243637	10.3475	down	NRED	chr19	-	7161954	7162911
CUST_8938_PI419771968		AK020200	0.00774832	10.341	down	NRED	chr1	-	132980852	132981313
CUST_11635_PI419771968		AK054377	0.00616737	10.3359	down	NRED	chr4	+	126378082	126381273
CUST_11092_PI419771968		AK048353	0.0448181	10.321	down	NRED	chr14	-	52874069	52877398
CUST_1630_PI419771968	Arhgef4	uc007apg	0.0071388	10.3045	down	UCSC_knowngene	chr1	+	34858566	34865756
CUST_11499_PI419771968		AK053038	0.0016377	10.2728	down	NRED	chr4	+	100459719	100461992
CUST_12322_PI419771968		AK085453	0.011836	10.2412	down	NRED	chr5	-	68224588	68228067
CUST_5504_PI419771968	Creb3l2	uc009bje	0.000267	10.2107	down	UCSC_knowngene	chr6	-	37277375	37281285
CUST_8091_PI419771968		AK016049	0.00692971	10.2097	down	NRED	chr12	-	62403539	62454878
CUST_1689_PI419771968	AK150559	uc007bgn	0.000517	10.2073	down	UCSC_knowngene	chr1	-	64079441	64082160
CUST_10927_PI419771968		AK046910	0.00370871	10.1937	down	NRED	chr18	+	50115628	50119297
CUST_9708_PI419771968		AK033336	0.00134908	10.1867	down	NRED	chr15	+	67008567	67012584
CUST_2686_PI419771968	Gtl2	uc007paq	0.0182242	10.1395	down	UCSC_knowngene	chr12	+	110779213	110799917
CUST_527_PI419771968		AK020957	0.00258977	10.1208	down	Fantom_stringent	chr10	-	83833647	83834352
CUST_11661_PI419771968		AK076294	0.000419	10.0918	down	NRED	chr12	+	77010204	77014874
CUST_7469_PI419771968		AK012473	0.00378128	10.0688	down	NRED	chr14	-	100265401	100266079
CUST_8926_PI419771968		AK020160	0.0034563	10.058	down	NRED	chr19	-	9910227	9911446
CUST_11624_PI419771968		AK054238	0.00148388	10.0268	down	NRED	chr11	-	18797400	18799913
CUST_12537_PI419771968		AK088568	0.00152269	10.0256	down	NRED	chrX	-	90673663	90676738
CUST_11582_PI419771968		AK053676	0.000709	10.0188	down	NRED	chr9	+	68972982	68975945
CUST_5758_PI419771968	AK031165	uc009evk	0.00319455	10.0164	down	UCSC_knowngene	chr7	+	3596869	3601182
CUST_12824_PI419771968		AK142969	0.00710111	10.0127	down	NRED	chr7	-	74427442	74429566
CUST_9720_PI419771968		AK033584	0.00252798	9.9985	down	NRED	chr10	+	13692241	13695040
CUST_11439_PI419771968		AK052513	0.00169863	9.99173	down	NRED	chr13	+	15756347	15759954
CUST_13581_PI419771968	Gm5643	NR_002883	0.00247434	9.98486	down	RefSeq_NR	chr15	+	103070884	103075386
CUST_12964_PI419771968		AK163456	0.00324671	9.9618	down	NRED	chr13	+	14159124	14161327
CUST_11526_PI419771968		AK053216	0.00836948	9.94276	down	NRED	chr2	+	75542826	75548081
CUST_12584_PI419771968		AK089571	0.00793149	9.94271	down	NRED	chr5	-	149202992	149205224
CUST_12118_PI419771968		AK083002	0.0211132	9.93238	down	NRED	chr13	+	110533583	110536453
CUST_9458_PI419771968		AK030568	0.00148007	9.92283	down	NRED	chr9_random	+	434036	437546
CUST_9711_PI419771968		AK033350	0.000162	9.89146	down	NRED	chr2	-	84578293	84581802
CUST_12530_PI419771968		AK088394	0.00455911	9.88364	down	NRED	chr2	+	103425948	103429427
CUST_10122_PI419771968		AK037532	5.05e-06	9.86222	down	NRED	chr10	-	70745751	70747964
CUST_10001_PI419771968		AK036157	0.0248208	9.82309	down	NRED	chr9	-	58755078	58758922
CUST_13262_PI419771968		BC054084	0.0133244	9.81704	down	NRED	chr4	-	3126550	3127466
CUST_13550_PI419771968	6720401G13Rik	NR_026976	0.00310287	9.81	down	RefSeq_NR	chrX	-	47908920	47988435
CUST_3645_PI419771968	2810051F02Rik	uc008alb	0.00935266	9.78872	down	UCSC_knowngene	chr17	+	12934177	13052750
CUST_6632_PI419771968	AK202543	uc009rya	0.0143944	9.7363	down	UCSC_knowngene	chr9	-	114633034	114633433
CUST_8911_PI419771968		AK020106	0.0102078	9.7358	down	NRED	chr11	-	69615637	69616437
CUST_7442_PI419771968		AK011983	0.00699996	9.72765	down	NRED	chr13	-	28817778	28818217
CUST_13281_PI419771968		BC060604	0.0140063	9.70855	down	NRED	chr1	-	93695104	93699514
CUST_11461_PI419771968		AK052717	0.00150546	9.69148	down	NRED	chr8	+	130961603	130964754
CUST_12565_PI419771968		AK089321	0.0106731	9.68562	down	NRED	chr2	+	180701983	180704235
CUST_10732_PI419771968		AK044494	0.00988417	9.66297	down	NRED	chr12	-	5246589	5249503
CUST_9531_PI419771968		AK031441	0.037017	9.6208	down	NRED	chr3	-	146472481	146475954
CUST_8948_PI419771968		AK020220	0.0277433	9.61256	down	NRED	chr5	-	44904896	44905799
CUST_9623_PI419771968		AK032566	0.0410311	9.60608	down	NRED	chr12	+	110887814	110890438
CUST_197_PI419771968		AK008676	5.74e-05	9.58937	down	Fantom_stringent	chr4	-	11259081	11259355
CUST_6172_PI419771968	AK040224	uc009lkz	0.0194482	9.58106	down	UCSC_knowngene	chr8	-	36645625	36652026
CUST_4525_PI419771968	mKIAA1125	uc008nyh	0.000146	9.57422	down	UCSC_knowngene	chr2	-	165698526	165709739
CUST_13553_PI419771968	Gm10052	NR_002885	0.0225676	9.56776	down	RefSeq_NR	chr15	+	103070862	103075015
CUST_9012_PI419771968		AK020424	0.00291694	9.56687	down	NRED	chr8	-	49463862	49465039
CUST_2253_PI419771968	AK138811	uc007ixa	0.00816925	9.55006	down	UCSC_knowngene	chr11	-	53598990	53672758
CUST_10618_PI419771968		AK043387	0.00304136	9.54973	down	NRED	chr19	-	40408521	40415084
CUST_11801_PI419771968		AK078757	0.00792741	9.54547	down	NRED	chr7	+	117201685	117204328
CUST_6180_PI419771968	AK144087	uc009lor	0.0085247	9.53178	down	UCSC_knowngene	chr8	-	46245847	46250499
CUST_8388_PI419771968		AK017285	2.05e-05	9.52702	down	NRED	chrX	-	6730936	6732267
CUST_11780_PI419771968		AK078562	0.00362032	9.51421	down	NRED	chr4	+	97557760	97560887
CUST_9953_PI419771968		AK035737	0.0232371	9.50886	down	NRED	chr5	-	122920668	122922786
CUST_1315_PI419771968		AK140938	0.00814241	9.49629	down	Fantom_stringent	chr7	-	80684686	80703281
CUST_8416_PI419771968		AK017434	0.0444507	9.43713	down	NRED	chr18	-	6234185	6235567
CUST_12374_PI419771968		AK086137	0.0214066	9.42513	down	NRED	chr8	+	119833147	119836587
CUST_10909_PI419771968		AK046760	0.0291459	9.42151	down	NRED	chr6	-	39560909	39563414
CUST_7245_PI419771968		AK008245	0.0254781	9.41132	down	NRED	chr12	-	85238417	85239170
CUST_8586_PI419771968		AK018045	0.00160626	9.40362	down	NRED	chr4	+	129497990	129499297
CUST_11538_PI419771968		AK053304	0.010233	9.39399	down	NRED	chr15	+	99803786	99806473
CUST_2362_PI419771968	AK011568	uc007kry	0.0113789	9.37112	down	UCSC_knowngene	chr11	-	85609290	85645725
CUST_8414_PI419771968		AK017428	0.00144064	9.32309	down	NRED	chr15	-	55520165	55521780
CUST_11357_PI419771968		AK051822	0.00119999	9.30779	down	NRED	chr1	-	188469924	188471364
CUST_11523_PI419771968		AK053200	0.00379751	9.29575	down	NRED	chr8	-	118097580	118099141
CUST_12080_PI419771968		AK082536	0.014887	9.25763	down	NRED	chr17	-	25084489	25085582
CUST_9951_PI419771968		AK035727	0.00367103	9.23913	down	NRED	chr11	+	35425493	35427695
CUST_1737_PI419771968	AK086911	uc007cdl	0.00950231	9.22393	down	UCSC_knowngene	chr1	+	95112475	95127649
CUST_2733_PI419771968	AK007605	uc007pmx	0.0217317	9.20596	down	UCSC_knowngene	chr13	-	14154724	14155679
CUST_9777_PI419771968		AK034235	0.00243001	9.16154	down	NRED	chr2	-	139498976	139501127
CUST_5903_PI419771968	AK080655	uc009hfb	0.0173167	9.15445	down	UCSC_knowngene	chr7	-	69075022	69127242
CUST_5629_PI419771968	AK197526	uc009cuu	0.00801824	9.15305	down	UCSC_knowngene	chr6	-	87949280	87949689
CUST_9115_PI419771968		AK020735	0.00128014	9.13801	down	NRED	chr3	+	81736544	81737247
CUST_6212_PI419771968	2310073E15Rik	uc009lyv	0.0121631	9.138	down	UCSC_knowngene	chr8	+	72655231	72656553
CUST_2690_PI419771968	Gtl2	uc007pav	0.000717	9.12107	down	UCSC_knowngene	chr12	+	110787366	110809935
CUST_4308_PI419771968	BC024571	uc008kbg	0.0004	9.11562	down	UCSC_knowngene	chr2	+	71694820	71696399
CUST_9375_PI419771968		AK029259	0.0047809	9.10615	down	NRED	chr8	-	42421387	42424013
CUST_9902_PI419771968		AK035284	0.00175488	9.09117	down	NRED	chr6	-	99085330	99087647
CUST_10110_PI419771968		AK037386	0.00181307	9.08709	down	NRED	chr4	+	97439338	97442236
CUST_744_PI419771968		AK044044	0.0017168	9.07642	down	Fantom_stringent	chr8	-	72273223	72273864
CUST_8559_PI419771968		AK017961	0.00951805	9.06097	down	NRED	chr18	-	36831625	36832123
CUST_1281_PI419771968		AK136560	0.000477	9.0266	down	Fantom_stringent	chr11	+	83037951	83040080
CUST_9480_PI419771968		AK031039	0.00241654	9.02608	down	NRED	chr4	-	84318072	84320977
CUST_12500_PI419771968		AK087528	0.0041836	9.0194	down	NRED	chr7	-	77503506	77504782
CUST_7253_PI419771968		AK008366	0.0113794	9.011	down	NRED	chr2	+	68804807	68805679
CUST_1131_PI419771968		AK086859	0.00205308	8.98323	down	Fantom_stringent	chr5	-	100152483	100158075
CUST_8863_PI419771968		AK019879	0.00923829	8.96944	down	NRED	chr2	-	6845969	6849768
CUST_5288_PI419771968	Sept11	uc008yec	0.00137068	8.94972	down	UCSC_knowngene	chr5	+	93596525	93605471
CUST_9320_PI419771968		AK028306	0.00214307	8.94929	down	NRED	chrX	+	45265643	45268759
CUST_8917_PI419771968		AK020116	0.00591081	8.94461	down	NRED	chr13	+	114765225	114766369
CUST_10788_PI419771968		AK045150	0.000485	8.94246	down	NRED	chr11	+	49877355	49880914
CUST_12685_PI419771968		AK134157	0.00101485	8.92993	down	NRED	chr12	-	113180201	113182695
CUST_7605_PI419771968		AK013771	0.00411377	8.92198	down	NRED	chr8	-	49927350	49928496
CUST_13279_PI419771968		BC060148	0.041544	8.92117	down	NRED	chr18	-	11813928	11816293
CUST_12554_PI419771968		AK089140	0.0095943	8.90217	down	NRED	chr12	-	71128156	71129806
CUST_11515_PI419771968		AK053128	0.0141796	8.90203	down	NRED	chr13	+	95793782	95796423
CUST_12170_PI419771968		AK083676	0.00601666	8.90149	down	NRED	chrX	-	105934084	105936951
CUST_11726_PI419771968		AK077879	0.00266546	8.89673	down	NRED	chr4	-	56826234	56829634
CUST_261_PI419771968		AK011228	0.0133455	8.87974	down	Fantom_stringent	chr18	+	24629366	24636266
CUST_8885_PI419771968		AK019973	0.0321321	8.87435	down	NRED	chr8	-	27162078	27163018
CUST_5863_PI419771968	Mrmt1	uc009gsi	0.0151126	8.86252	down	UCSC_knowngene	chr7	-	52237107	52239420
CUST_6711_PI419771968	AK003723	uc009tar	0.00209762	8.84868	down	UCSC_knowngene	chrX	+	39412855	39425814
CUST_11749_PI419771968		AK078021	0.0180393	8.78935	down	NRED	chr2	+	92190911	92193246
CUST_3936_PI419771968	AK079263	uc008eyu	0.00320655	8.75497	down	UCSC_knowngene	chr18	+	56892896	56896287
CUST_6750_PI419771968	AK050859	uc009ttp	0.00637351	8.73309	down	UCSC_knowngene	chrX	+	91881414	91888583
CUST_11595_PI419771968		AK053821	0.0447737	8.72725	down	NRED	chr3	-	5572602	5576099
CUST_11061_PI419771968		AK048140	0.0437651	8.72647	down	NRED	chr10	+	75383956	75385286
CUST_7391_PI419771968		AK011173	0.00119536	8.69942	down	NRED	chr7	-	134375931	134376644
CUST_9530_PI419771968		AK031438	7.93e-05	8.69773	down	NRED	chr8	-	106898660	106901405
CUST_11325_PI419771968		AK051507	0.000355	8.69588	down	NRED	chr1	+	196765098	196776955
CUST_13041_PI419771968		AB076245	0.00354361	8.69323	down	NRED	chr12	+	110891138	110893202
CUST_6785_PI419771968	Mcart6	uc009ujp	0.00723053	8.69149	down	UCSC_knowngene	chrX	-	133535593	133572841
CUST_13696_PI419771968	LOC100270707	NR_026741	0.0041457	8.68445	down	RefSeq_NR	chrX	+	6953050	6955168
CUST_11789_PI419771968		AK078629	0.00926662	8.67637	down	NRED	chrX	-	143972631	143974576
CUST_5182_PI419771968	AK139799	uc008wuz	0.00204715	8.66046	down	UCSC_knowngene	chr5	+	30419493	30424222
CUST_9204_PI419771968		AK021040	0.00721456	8.63875	down	NRED	chr15	+	18859347	18860058
CUST_7432_PI419771968		AK011858	0.00578747	8.61895	down	NRED	chr16	+	94606823	94607366
CUST_10818_PI419771968		AK045533	0.0221045	8.61825	down	NRED	chrX	+	17851640	17855386
CUST_5864_PI419771968	AK087248	uc009gsj	0.0145934	8.59023	down	UCSC_knowngene	chr7	+	52242292	52249967
CUST_11428_PI419771968		AK052455	0.00532857	8.58407	down	NRED	chr4	-	141244566	141247619
CUST_4512_PI419771968	Chd6	uc008nro	0.001223	8.57243	down	UCSC_knowngene	chr2	-	160785694	160787257
CUST_12946_PI419771968		AK162395	0.00113441	8.56828	down	NRED	chr14	-	24240840	24245783
CUST_12778_PI419771968		AK140693	0.00819812	8.55306	down	NRED	chr7	-	28034281	28042951
CUST_4571_PI419771968	LOC626832	uc008ohg	0.00182961	8.53009	down	UCSC_knowngene	chr2	-	177670697	177691993
CUST_13296_PI419771968		BC071254	0.000463	8.52744	down	NRED	chr17	+	39979957	39980970
CUST_8426_PI419771968		AK017499	0.0043821	8.50014	down	NRED	chr11	-	5656954	5658302
CUST_9467_PI419771968		AK030733	0.00308484	8.49625	down	NRED	chr19	-	14559762	14562794
CUST_10085_PI419771968		AK037153	0.000826	8.48719	down	NRED	chr11	-	86775422	86777798
CUST_2689_PI419771968	Gtl2	uc007pat	0.0288464	8.47311	down	UCSC_knowngene	chr12	+	110782236	110809935
CUST_12133_PI419771968		AK083199	0.000361	8.46757	down	NRED	chr19	-	46834160	46837849
CUST_1688_PI419771968	AK017924	uc007bft	0.0142124	8.46624	down	UCSC_knowngene	chr1	+	63161044	63204864
CUST_1070_PI419771968		AK083616	0.00241666	8.45701	down	Fantom_stringent	chr1	-	170083657	170085343
CUST_12210_PI419771968		AK084102	0.000263	8.44726	down	NRED	chr16	-	84965476	84967317
CUST_2694_PI419771968	AK017440	uc007pbc	0.0351888	8.44295	down	UCSC_knowngene	chr12	+	110884353	110899921
CUST_636_PI419771968		AK035288	0.00581187	8.43651	down	Fantom_stringent	chr2	+	181285845	181287585
CUST_7590_PI419771968		AK013713	0.00700989	8.4198	down	NRED	chr8	+	109498732	109500050
CUST_4907_PI419771968	AK008866	uc008sxb	0.00339336	8.41476	down	UCSC_knowngene	chr4	+	53578621	53580682
CUST_7277_PI419771968		AK008796	0.00809219	8.41338	down	NRED	chr2	-	22847014	22848972
CUST_10936_PI419771968		AK047021	0.000877	8.3952	down	NRED	chr4	-	97441213	97443134
CUST_5602_PI419771968	AK010122	uc009clm	0.0131359	8.39444	down	UCSC_knowngene	chr6	-	82827859	82831847
CUST_11456_PI419771968		AK052676	0.000744	8.39189	down	NRED	chrX	-	71326373	71329610
CUST_10980_PI419771968		AK047425	0.00754367	8.3841	down	NRED	chr6	-	118857698	118859767
CUST_10990_PI419771968		AK047526	0.0112472	8.37877	down	NRED	chr6	-	93968541	93972667
CUST_11400_PI419771968		AK052106	0.0157874	8.37057	down	NRED	chr1	-	170253652	170254919
CUST_9666_PI419771968		AK033072	0.0240472	8.36917	down	NRED	chr12	-	5121653	5123458
CUST_86_PI419771968		AK004787	0.000209	8.3676	down	Fantom_stringent	chr18	-	60844148	60847086
CUST_9682_PI419771968		AK033148	0.000943	8.35232	down	NRED	chr6	+	34585196	34589516
CUST_8576_PI419771968		AK018000	0.000578	8.34915	down	NRED	chr16	+	23280233	23280758
CUST_9484_PI419771968		AK031095	0.0112691	8.32391	down	NRED	chr5	+	46051305	46053960
CUST_9348_PI419771968		AK028893	0.00459819	8.3125	down	NRED	chr4	+	62043037	62045642
CUST_7480_PI419771968		AK012671	0.00990908	8.29719	down	NRED	chr10	-	105275340	105276692
CUST_11497_PI419771968		AK053030	0.0408141	8.29329	down	NRED	chr9	-	36950568	36953400
CUST_2485_PI419771968	AK011693	uc007mla	0.00144367	8.2859	down	UCSC_knowngene	chr11	-	116264154	116274346
CUST_9849_PI419771968		AK034805	0.00326851	8.25907	down	NRED	chr13	-	9711477	9715303
CUST_12231_PI419771968		AK084320	0.00472206	8.25563	down	NRED	chr4	-	153846420	153849409
CUST_10424_PI419771968		AK040785	0.000886	8.24438	down	NRED	chr1	-	16677783	16679061
CUST_10473_PI419771968		AK041509	0.0101484	8.23077	down	NRED	chr14	-	21519333	21521135
CUST_1333_PI419771968		AK142841	0.0128836	8.21628	down	Fantom_stringent	chr6	-	118537257	118541546
CUST_2660_PI419771968	AK131831	uc007orz	0.00347916	8.21512	down	UCSC_knowngene	chr12	+	100802050	100858248
CUST_11660_PI419771968		AK076289	0.00376785	8.21479	down	NRED	chr16	+	24508120	24511779
CUST_5649_PI419771968	Scs	uc009dab	0.00409734	8.20879	down	UCSC_knowngene	chr6	-	95516389	95605593
CUST_2553_PI419771968	AK018309	uc007ndh	0.0161462	8.195	down	UCSC_knowngene	chr12	+	20996319	21049194
CUST_10225_PI419771968		AK038360	5.75e-05	8.18561	down	NRED	chr10	-	12495586	12498167
CUST_8855_PI419771968		AK019832	0.00184763	8.177	down	NRED	chr10	-	104961097	104963416
CUST_9712_PI419771968		AK033357	0.000262	8.17117	down	NRED	chr7	+	56809261	56812100
CUST_10622_PI419771968		AK043413	0.0159183	8.15761	down	NRED	chr8	+	111704654	111709534
CUST_11806_PI419771968		AK078847	0.0259379	8.15279	down	NRED	chr3	-	104742536	104744236
CUST_9074_PI419771968		AK020581	0.00222882	8.1346	down	NRED	chr17	+	74794979	74795527
CUST_4559_PI419771968	AK166773	uc008ofk	0.00911634	8.12977	down	UCSC_knowngene	chr2	-	174957386	174967500
CUST_809_PI419771968		AK048598	0.000195	8.12511	down	Fantom_stringent	chr13	-	23519985	23522832
CUST_10478_PI419771968		AK041557	0.0322329	8.11686	down	NRED	chr2	-	160922636	160927326
CUST_11906_PI419771968		AK080586	0.00767097	8.10618	down	NRED	chr8	-	75547295	75550350
CUST_11779_PI419771968		AK078537	0.00120673	8.10557	down	NRED	chr19	+	11893060	11895596
CUST_5566_PI419771968	AK076597	uc009bzn	0.0145211	8.10236	down	UCSC_knowngene	chr6	+	53928684	53968024
CUST_8874_PI419771968		AK019926	4.39e-05	8.09643	down	NRED	chr13	-	100272431	100274394
CUST_811_PI419771968		AK048740	0.00170137	8.09555	down	Fantom_stringent	chr13	-	23519844	23522696
CUST_3165_PI419771968	AK079958	uc007uwp	0.00821174	8.06768	down	UCSC_knowngene	chr14	+	103855588	103911834
CUST_11925_PI419771968		AK080917	0.000674	8.04047	down	NRED	chr9	-	48502581	48505735
CUST_11585_PI419771968		AK053707	0.00522238	8.03844	down	NRED	chr8	-	75875065	75877400
CUST_6250_PI419771968	Dnase2a	uc009mob	0.000863	8.02303	down	UCSC_knowngene	chr8	+	87435234	87438411
CUST_11183_PI419771968		AK049261	0.00163728	8.00767	down	NRED	chr2	-	177803180	177813160
CUST_9060_PI419771968		AK020546	0.0014148	7.99243	down	NRED	chr8	-	35038638	35039241
CUST_11174_PI419771968		AK049046	0.000388	7.99155	down	NRED	chr3	+	145467225	145470233
CUST_6342_PI419771968	AK004221	uc009nrm	0.00437511	7.98183	down	UCSC_knowngene	chr8	-	123582702	123584313
CUST_6506_PI419771968	AK043361	uc009qaf	0.0220819	7.98074	down	UCSC_knowngene	chr9	-	61928126	61970416
CUST_2020_PI419771968	AK138135	uc007fpd	0.00492108	7.94395	down	UCSC_knowngene	chr10	+	72562089	73179343
CUST_358_PI419771968		AK014035	0.00263671	7.93448	down	Fantom_stringent	chr11	+	69652064	69653114
CUST_3846_PI419771968	AK014726	uc008dyg	0.00284431	7.93031	down	UCSC_knowngene	chr18	+	4353555	4368918
CUST_11443_PI419771968		AK052537	0.00322914	7.92725	down	NRED	chrX	+	126875264	126875917
CUST_11798_PI419771968		AK078742	0.000338	7.87189	down	NRED	chr16	+	43500957	43504167
CUST_10257_PI419771968		AK038732	0.000252	7.87183	down	NRED	chrX	+	39013850	39017358
CUST_650_PI419771968		AK036616	0.000908	7.86301	down	Fantom_stringent	chr19	+	8797976	8800932
CUST_3680_PI419771968	AK011460	uc008awt	0.00161779	7.85654	down	UCSC_knowngene	chr17	+	24665195	24665688
CUST_10080_PI419771968		AK037105	0.00397476	7.84055	down	NRED	chrX	+	81276053	81278717
CUST_2086_PI419771968	AK136927	uc007gua	0.034108	7.83833	down	UCSC_knowngene	chr10	-	91544494	91596204
CUST_12639_PI419771968		AK090328	0.00107473	7.83029	down	NRED	chr7	-	125589776	125591570
CUST_3965_PI419771968	BC028804	uc008fma	0.0469444	7.8149	down	UCSC_knowngene	chr18	-	67480862	67487864
CUST_4498_PI419771968	Caper	uc008nmw	0.0266145	7.79005	down	UCSC_knowngene	chr2	-	156004296	156005976
CUST_12235_PI419771968		AK084380	0.0101723	7.77986	down	NRED	chr16	+	72798051	72802250
CUST_12997_PI419771968		AK165901	0.00657237	7.76599	down	NRED	chr14	-	62221675	62301199
CUST_11003_PI419771968		AK047606	0.0119043	7.75622	down	NRED	chr4	-	86748516	86750138
CUST_9910_PI419771968		AK035372	0.00196221	7.74394	down	NRED	chr8	+	63831623	63833285
CUST_7239_PI419771968		AK008102	0.000821	7.73937	down	NRED	chr7	+	16633793	16634404
CUST_5544_PI419771968	AK129160	uc009buo	0.00131064	7.73707	down	UCSC_knowngene	chr6	+	48454335	48484831
CUST_8440_PI419771968		AK017560	0.00949245	7.71784	down	NRED	chr14	-	24125843	24127542
CUST_9293_PI419771968		AK021356	0.00451795	7.70896	down	NRED	chr3	-	153171840	153172706
CUST_9214_PI419771968		AK021064	0.000805	7.70665	down	NRED	chr15	+	18748679	18749790
CUST_11450_PI419771968		AK052630	0.00244383	7.70074	down	NRED	chrX	-	49491065	49492701
CUST_11376_PI419771968		AK051921	0.000277	7.68909	down	NRED	chr6	+	108476603	108480237
CUST_12501_PI419771968		AK087552	0.00108329	7.6819	down	NRED	chr4	+	154975727	154976569
CUST_11462_PI419771968		AK052723	0.0043388	7.67959	down	NRED	chr13	+	114861606	114865242
CUST_12034_PI419771968		AK082168	0.00827976	7.67793	down	NRED	chr12	+	109766966	109769718
CUST_9479_PI419771968		AK031010	5.72e-05	7.67188	down	NRED	chr18	+	68419147	68420202
CUST_10681_PI419771968		AK043966	0.00193734	7.65957	down	NRED	chr16	-	89908487	90144059
CUST_5917_PI419771968	AK162351	uc009hik	0.038398	7.65762	down	UCSC_knowngene	chr7	-	74391423	74395004
CUST_6470_PI419771968	Ncam1	uc009pjm	0.00734449	7.63487	down	UCSC_knowngene	chr9	-	49449694	49607174
CUST_13317_PI419771968		BC096373	0.00426786	7.6256	down	NRED	chr2	-	177803195	177813181
CUST_3356_PI419771968	AK159003	uc007xdh	0.0226071	7.62094	down	UCSC_knowngene	chr15	+	85411571	85424138
CUST_9675_PI419771968		AK033115	0.0054188	7.5822	down	NRED	chr6	-	144492028	144493975
CUST_11294_PI419771968		AK051204	0.013317	7.5789	down	NRED	chr2	-	44863947	44866220
CUST_11724_PI419771968		AK077830	0.011923	7.56773	down	NRED	chr9	-	58824487	58827277
CUST_8558_PI419771968		AK017960	0.0117	7.55922	down	NRED	chr6	-	76937972	76939641
CUST_13291_PI419771968		BC066049	0.00563814	7.55816	down	NRED	chr14	-	34999286	35003446
CUST_6639_PI419771968	AZ2	uc009rzk	0.0353114	7.55724	down	UCSC_knowngene	chr9	+	117949616	117978912
CUST_2519_PI419771968	1700012B15Rik	uc007mwh	0.00327838	7.5569	down	UCSC_knowngene	chr12	+	3235512	3239288
CUST_6749_PI419771968	BC084590	uc009tsy	0.00131568	7.5553	down	UCSC_knowngene	chrX	+	91213997	91220809
CUST_7709_PI419771968		AK014658	0.00822538	7.54195	down	NRED	chr13	+	110440120	110441927
CUST_9683_PI419771968		AK033155	0.0270278	7.53039	down	NRED	chrX	-	143980913	143983416
CUST_9684_PI419771968		AK033161	0.00967219	7.5229	down	NRED	chr2	+	17948875	17952598
CUST_12163_PI419771968		AK083553	0.000823	7.5215	down	NRED	chr1	+	59858106	59861544
CUST_12677_PI419771968		AK133561	0.0171528	7.48942	down	NRED	chr13	+	110583691	110588730
CUST_12239_PI419771968		AK084437	0.00139275	7.48477	down	NRED	chr19	+	22825159	22828026
CUST_10659_PI419771968		AK043701	0.000121	7.4799	down	NRED	chr3	-	36528648	36529782
CUST_6766_PI419771968	AK082779	uc009ubc	0.00510111	7.47225	down	UCSC_knowngene	chrX	-	103046775	103047406
CUST_5862_PI419771968	AK020101	uc009gse	0.00200917	7.46542	down	UCSC_knowngene	chr7	+	52225798	52229673
CUST_5673_PI419771968	AK078466	uc009dii	4.09e-05	7.44901	down	UCSC_knowngene	chr6	-	114870071	114871834
CUST_2164_PI419771968	Rpl41	uc007hnj	0.00411328	7.44602	down	UCSC_knowngene	chr10	-	127985172	127986126
CUST_8002_PI419771968		AK015725	0.000731	7.4335	down	NRED	chr18	+	74019047	74040987
CUST_12653_PI419771968		AK132080	0.00369794	7.42321	down	NRED	chr19	-	40532702	40533455
CUST_5604_PI419771968	Aup1	uc009cma	0.0209162	7.41612	down	UCSC_knowngene	chr6	+	83006971	83007676
CUST_5250_PI419771968	BC034252	uc008xqo	0.00459429	7.40859	down	UCSC_knowngene	chr5	+	69964115	69965891
CUST_7313_PI419771968		AK009271	0.000105	7.39871	down	NRED	chrX	-	34354765	34357195
CUST_542_PI419771968		AK028520	0.00303906	7.39098	down	Fantom_stringent	chr7	+	138532702	138536280
CUST_10249_PI419771968		AK038647	0.00601384	7.36874	down	NRED	chr2	+	67452659	67457055
CUST_7631_PI419771968		AK013968	0.000268	7.36239	down	NRED	chr5	-	132000820	132001533
CUST_4459_PI419771968	AK031463	uc008mrt	0.00848087	7.36003	down	UCSC_knowngene	chr2	+	145501260	145540725
CUST_6258_PI419771968	Phkb	uc009mqh	0.0285799	7.35576	down	UCSC_knowngene	chr8	+	88364889	88460945
CUST_2206_PI419771968	AK144295	uc007icp	0.002666	7.35068	down	UCSC_knowngene	chr11	+	18913891	18915157
CUST_8484_PI419771968		AK017916	0.00971719	7.34244	down	NRED	chr2	-	12285963	12287808
CUST_1601_PI419771968		AK172317	0.00820534	7.34033	down	Fantom_stringent	chr8	+	119833149	119836874
CUST_10172_PI419771968		AK038003	0.00680651	7.33019	down	NRED	chr5	-	68024901	68026547
CUST_7800_PI419771968		AK015104	0.00273494	7.31387	down	NRED	chr11	-	86764065	86765401
CUST_11141_PI419771968		AK048773	0.000539	7.30338	down	NRED	chr14	-	24242807	24246553
CUST_741_PI419771968		AK043880	0.00125727	7.29315	down	Fantom_stringent	chr4	+	71862287	71864964
CUST_7719_PI419771968		AK014710	0.00119325	7.28752	down	NRED	chr7	+	82845749	82847810
CUST_12703_PI419771968		AK135606	0.00167349	7.28193	down	NRED	chr2	-	34193103	34195572
CUST_12221_PI419771968		AK084192	0.00409733	7.27954	down	NRED	chr19	+	55847319	55849810
CUST_12127_PI419771968		AK083087	8.98e-05	7.26848	down	NRED	chr9	-	66877726	66880632
CUST_2001_PI419771968	AK005214	uc007fjw	0.0261905	7.25716	down	UCSC_knowngene	chr10	+	62563111	62563726
CUST_11037_PI419771968		AK047900	0.0130811	7.25006	down	NRED	chr4	-	90878233	90880506
CUST_10611_PI419771968		AK043302	0.00188402	7.2454	down	NRED	chr10	+	89379106	89381359
CUST_1767_PI419771968	Lemd1	uc007coi	0.00105902	7.24175	down	UCSC_knowngene	chr1	+	134088007	134106123
CUST_12419_PI419771968		AK086488	0.00252241	7.24113	down	NRED	chr2	-	71165481	71169071
CUST_10999_PI419771968		AK047585	0.0019004	7.24063	down	NRED	chr4	+	149442647	149445106
CUST_1724_PI419771968	Tnrc15	uc007bwq	0.00301636	7.23939	down	UCSC_knowngene	chr1	+	89223627	89254359
CUST_10323_PI419771968		AK039502	0.000181	7.23134	down	NRED	chr14	-	94283639	94284448
CUST_5528_PI419771968	Tcrb	uc009bpn	0.0170315	7.22829	down	UCSC_knowngene	chr6	+	41485554	41489880
CUST_4264_PI419771968	AK142949	uc008jlk	0.00308927	7.22143	down	UCSC_knowngene	chr2	+	36057831	36068422
CUST_11528_PI419771968		AK053245	0.0444242	7.22126	down	NRED	chr2	+	16665741	16666908
CUST_9939_PI419771968		AK035626	0.00155511	7.21976	down	NRED	chr6	+	51410312	51411805
CUST_12782_PI419771968		AK140834	0.0026671	7.21088	down	NRED	chr11	-	5326174	5330255
CUST_7421_PI419771968		AK011660	0.014249	7.19929	down	NRED	chr10	+	72120651	72121705
CUST_6861_PI419771968		AK003710	0.0155723	7.19894	down	NRED	chr7	-	6623979	6625599
CUST_10345_PI419771968		AK039736	0.00874639	7.18805	down	NRED	chr9	-	81521903	81524404
CUST_2235_PI419771968	AK136017	uc007ile	0.00459275	7.18541	down	UCSC_knowngene	chr11	+	35163570	35164287
CUST_10028_PI419771968		AK036481	0.00727973	7.17916	down	NRED	chr6	-	38255302	38257158
CUST_10220_PI419771968		AK038312	0.00629957	7.16784	down	NRED	chr10	+	5967881	5971393
CUST_11613_PI419771968		AK054058	0.0335312	7.15855	down	NRED	chr6	-	52178277	52180531
CUST_12341_PI419771968		AK085648	0.00363474	7.14053	down	NRED	chr16	+	29641464	29643534
CUST_7465_PI419771968		AK012332	0.00686749	7.13824	down	NRED	chr5	+	23359609	23360851
CUST_11176_PI419771968		AK049070	0.00420009	7.13274	down	NRED	chr5	+	65195252	65196974
CUST_5585_PI419771968	AK054076	uc009cfe	0.0131857	7.12599	down	UCSC_knowngene	chr6	+	66986592	67030646
CUST_10118_PI419771968		AK037499	0.00264679	7.11375	down	NRED	chr5	-	124624925	124631254
CUST_9650_PI419771968		AK032859	0.00342334	7.10709	down	NRED	chr11	+	19877993	19880906
CUST_9488_PI419771968		AK031166	8.65e-05	7.09645	down	NRED	chr16	+	77637778	77639447
CUST_10259_PI419771968		AK038765	0.00244787	7.09347	down	NRED	chr2	-	52297453	52301979
CUST_10102_PI419771968		AK037318	0.000792	7.08876	down	NRED	chr6	-	99285729	99289118
CUST_9938_PI419771968		AK035617	0.00567594	7.08207	down	NRED	chr2	+	69738039	69740434
CUST_3539_PI419771968	AK194005	uc007zns	0.00280655	7.08122	down	UCSC_knowngene	chr16	-	58470002	58470408
CUST_4415_PI419771968	BC002288	uc008mag	0.00232503	7.07376	down	UCSC_knowngene	chr2	+	121973452	121975096
CUST_11454_PI419771968		AK052674	0.0323343	7.05911	down	NRED	chr11	-	97505497	97521681
CUST_6689_PI419771968	BC058988	uc009sps	0.000307	7.05138	down	UCSC_knowngene	chrX	-	8906100	8909733
CUST_1359_PI419771968		AK146143	0.0292989	7.04914	down	Fantom_stringent	chr11	-	94870711	94871231
CUST_6724_PI419771968	AK142406	uc009tfn	0.0180551	7.04019	down	UCSC_knowngene	chrX	-	51272613	51278177
CUST_4323_PI419771968	AK146150	uc008kek	0.0183382	7.03708	down	UCSC_knowngene	chr2	-	75296268	75302847
CUST_12222_PI419771968		AK084203	0.00761623	7.03557	down	NRED	chr13	+	83668866	83670971
CUST_7578_PI419771968		AK013655	0.00147034	7.03438	down	NRED	chr2	-	6966599	6967665
CUST_10052_PI419771968		AK036774	0.00237471	7.0342	down	NRED	chr15	+	25564381	25567995
CUST_311_PI419771968		AK012979	0.0058054	7.02979	down	Fantom_stringent	chr4	+	100115034	100117099
CUST_10910_PI419771968		AK046762	0.00835043	7.02495	down	NRED	chr9	+	21810011	21813689
CUST_12077_PI419771968		AK082480	0.0014174	7.01806	down	NRED	chr12	+	54479892	54482768
CUST_6693_PI419771968	AK017500	uc009srf	0.000351	7.01555	down	UCSC_knowngene	chrX	+	12619140	12622421
CUST_9948_PI419771968		AK035699	0.0467004	7.01542	down	NRED	chr2	+	115465703	115467366
CUST_5753_PI419771968	AK134400	uc009eue	0.00904525	7.01259	down	UCSC_knowngene	chr6	+	149259937	149262911
CUST_11449_PI419771968		AK052617	0.00260876	7.00458	down	NRED	chr19	-	28591848	28594190
CUST_9353_PI419771968		AK028953	0.00101859	6.99673	down	NRED	chrX	+	109424956	109462093
CUST_966_PI419771968		AK078829	0.00508907	6.99593	down	Fantom_stringent	chr16	-	76287650	76288890
CUST_12989_PI419771968		AK165095	0.0015866	6.99383	down	NRED	chr7	+	13063715	13069250
CUST_1841_PI419771968	AK014177	uc007dls	0.0028503	6.98084	down	UCSC_knowngene	chr1	+	171899539	171902526
CUST_12415_PI419771968		AK086447	0.0222411	6.95883	down	NRED	chr1	-	22770614	22771366
CUST_11929_PI419771968		AK080938	0.0185028	6.94534	down	NRED	chr5	-	132500872	132504496
CUST_12475_PI419771968		AK087211	0.0376375	6.93756	down	NRED	chr12	-	114193759	114196609
CUST_11864_PI419771968		AK079890	0.0190255	6.92275	down	NRED	chr3	-	89820061	89821551
CUST_10037_PI419771968		AK036574	0.021311	6.91969	down	NRED	chr10	+	41593972	41596436
CUST_12249_PI419771968		AK084637	0.000956	6.90867	down	NRED	chr1	-	60541725	60543229
CUST_9581_PI419771968		AK032144	0.00873256	6.90335	down	NRED	chr18	+	69573491	69574662
CUST_3_PI419771968		AK002304	0.00369088	6.89703	down	Fantom_stringent	chr15	-	32170323	32174417
CUST_11630_PI419771968		AK054328	0.00588652	6.8949	down	NRED	chr13	+	83777784	83780561
CUST_6415_PI419771968	BC061253	uc009oqn	0.00379034	6.89099	down	UCSC_knowngene	chr9	+	27156583	27158793
CUST_11937_PI419771968		AK081024	0.00807451	6.8882	down	NRED	chr11	+	105996131	105999643
CUST_4164_PI419771968	AK165766	uc008hzy	0.0146403	6.88239	down	UCSC_knowngene	chr19	-	57191265	57193423
CUST_2190_PI419771968	AK160548	uc007hyu	0.000629	6.875	down	UCSC_knowngene	chr11	-	6425621	6428763
CUST_5522_PI419771968	Tcrb	uc009bpf	0.00662521	6.873	down	UCSC_knowngene	chr6	+	41483999	41489880
CUST_6019_PI419771968	AK009335	uc009jgw	0.000561	6.86513	down	UCSC_knowngene	chr7	-	119809073	119823595
CUST_6202_PI419771968	AK014119	uc009lvh	0.0041652	6.85622	down	UCSC_knowngene	chr8	-	67552318	67561235
CUST_10930_PI419771968		AK046930	0.00271813	6.85306	down	NRED	chr1	+	187051126	187053216
CUST_10191_PI419771968		AK038116	0.00414661	6.85156	down	NRED	chr12	+	4619083	4622396
CUST_8450_PI419771968		AK017619	0.00132179	6.84794	down	NRED	chr15	+	6376188	6377817
CUST_9564_PI419771968		AK031830	0.0107608	6.8435	down	NRED	chr13	-	100222025	100223731
CUST_5883_PI419771968	AK033058	uc009had	0.0118749	6.83257	down	UCSC_knowngene	chr7	-	54397526	54399692
CUST_9928_PI419771968		AK035492	0.00797965	6.82871	down	NRED	chr2	-	169449555	169453818
CUST_5584_PI419771968	AK029473	uc009cfd	0.0324901	6.82734	down	UCSC_knowngene	chr6	+	66986592	67030646
CUST_12509_PI419771968		AK087704	0.00531827	6.82607	down	NRED	chrX	-	91333085	91336120
CUST_5523_PI419771968	H4	uc009bpg	0.0194097	6.82348	down	UCSC_knowngene	chr6	+	41484315	41489880
CUST_3880_PI419771968	AK043919	uc008ejg	0.000595	6.81998	down	UCSC_knowngene	chr18	-	32518710	32537938
CUST_216_PI419771968		AK009372	0.000355	6.8198	down	Fantom_stringent	chr17	-	50132586	50133655
CUST_2500_PI419771968	AK149260	uc007mpy	0.00109687	6.81182	down	UCSC_knowngene	chr11	-	118966445	118972739
CUST_8670_PI419771968		AK018486	0.00670195	6.80921	down	NRED	chr6	-	54275828	54277902
CUST_382_PI419771968		AK015184	0.0133132	6.80467	down	Fantom_stringent	chrX	+	155997909	155999893
CUST_12526_PI419771968		AK088223	0.000103	6.80043	down	NRED	chr2	-	144092764	144096573
CUST_8886_PI419771968		AK019982	0.0032166	6.79541	down	NRED	chr11	+	105451296	105452135
CUST_2199_PI419771968	AK040873	uc007ibg	0.0197841	6.7917	down	UCSC_knowngene	chr11	+	12214516	12237133
CUST_9345_PI419771968		AK028853	0.0188597	6.78913	down	NRED	chr1	+	153292434	153294871
CUST_10797_PI419771968		AK045246	0.0236456	6.77074	down	NRED	chr10	+	28036840	28039714
CUST_8947_PI419771968		AK020216	0.011707	6.76812	down	NRED	chr2	+	90810340	90811129
CUST_788_PI419771968		AK047045	0.00139366	6.76757	down	Fantom_stringent	chr18	+	10812907	10816766
CUST_11046_PI419771968		AK047945	0.00123394	6.75192	down	NRED	chr16	+	77646584	77649671
CUST_8959_PI419771968		AK020250	0.00779047	6.74972	down	NRED	chr18	-	60812427	60819775
CUST_8618_PI419771968		AK018227	0.00685654	6.74723	down	NRED	chr8	+	73290477	73292119
CUST_8495_PI419771968		AK017951	0.000231	6.74274	down	NRED	chr15	-	102438048	102439215
CUST_1917_PI419771968	AK045519	uc007ekf	0.002121	6.71059	down	UCSC_knowngene	chr10	-	12636445	12642898
CUST_6760_PI419771968	BC076616	uc009tzw	0.0115624	6.71053	down	UCSC_knowngene	chrX	-	100764906	100819093
CUST_8972_PI419771968		AK020313	0.0163217	6.7087	down	NRED	chr4	-	45419084	45420043
CUST_1572_PI419771968		AK168001	0.00159471	6.70115	down	Fantom_stringent	chr11	+	83037095	83040087
CUST_1118_PI419771968		AK086186	0.000611	6.70031	down	Fantom_stringent	chr7	+	134708982	134710450
CUST_3285_PI419771968	FAK	uc007wcc	0.0194519	6.69414	down	UCSC_knowngene	chr15	-	73173562	73253710
CUST_9673_PI419771968		AK033102	0.00279427	6.69024	down	NRED	chr3	+	132469216	132472431
CUST_6122_PI419771968	AK042353	uc009kud	0.0180134	6.6731	down	UCSC_knowngene	chr8	+	8335076	8342428
CUST_3797_PI419771968	AK082862	uc008dln	0.00108811	6.67109	down	UCSC_knowngene	chr17	-	71115178	71155399
CUST_9512_PI419771968		AK031341	0.0316772	6.67016	down	NRED	chr14	-	63860808	63864096
CUST_13697_PI419771968	6720401G13Rik	NR_015505	0.00119452	6.65446	down	RefSeq_NR	chrX	-	47916296	47988435
CUST_9453_PI419771968		AK030494	0.00112331	6.65091	down	NRED	chrX	-	137121841	137123985
CUST_7699_PI419771968		AK014609	0.00100876	6.64348	down	NRED	chr3	-	121490417	121491490
CUST_12697_PI419771968		AK135056	0.00422916	6.6432	down	NRED	chr11	-	51807068	51810930
CUST_11269_PI419771968		AK050834	0.00638374	6.63934	down	NRED	chr8	+	129090869	129114888
CUST_1064_PI419771968		AK083217	0.00505232	6.6383	down	Fantom_stringent	chr4	-	129295345	129296354
CUST_10114_PI419771968		AK037414	0.00365083	6.62711	down	NRED	chr12	-	82681630	82684348
CUST_9942_PI419771968		AK035670	0.0181574	6.62439	down	NRED	chr12	+	33650190	33655207
CUST_11419_PI419771968		AK052308	0.00828299	6.61906	down	NRED	chr18	-	44987399	44988577
CUST_12263_PI419771968		AK084869	0.0133552	6.61828	down	NRED	chr9	+	103207560	103208314
CUST_13329_PI419771968		BC106196	0.0139909	6.60936	down	NRED	chr4	-	148938630	148941906
CUST_9592_PI419771968		AK032294	0.000589	6.60833	down	NRED	chr2	-	6844239	6847956
CUST_8881_PI419771968		AK019943	0.0191523	6.60744	down	NRED	chr5	-	110103561	110104508
CUST_2558_PI419771968	2410018L13Rik	uc007nef	0.00183077	6.60184	down	UCSC_knowngene	chr12	+	22990655	23046940
CUST_4499_PI419771968	AK085172	uc008nnb	0.00497406	6.5987	down	UCSC_knowngene	chr2	+	156096817	156099086
CUST_10161_PI419771968		AK037895	0.0226235	6.59342	down	NRED	chr3	-	51352604	51355242
CUST_5191_PI419771968	AK036733	uc008wys	0.00210339	6.57835	down	UCSC_knowngene	chr5	-	31871967	31873770
CUST_10905_PI419771968		AK046705	0.00362572	6.57814	down	NRED	chr9	-	92436013	92437707
CUST_10182_PI419771968		AK038070	0.00906896	6.57532	down	NRED	chr4	+	119808076	119810647
CUST_503_PI419771968		AK020048	0.00178447	6.57214	down	Fantom_stringent	chr15	+	101123660	101126749
CUST_7364_PI419771968		AK010104	0.0141797	6.56771	down	NRED	chr14	-	67610009	67611244
CUST_166_PI419771968		AK007736	0.00945491	6.56379	down	Fantom_stringent	chr10	-	118292660	118293990
CUST_8634_PI419771968		AK018305	0.0437911	6.5607	down	NRED	chr3	+	67267589	67269000
CUST_12901_PI419771968		AK155976	0.0101273	6.5593	down	NRED	chr2	-	156004562	156005922
CUST_11402_PI419771968		AK052114	0.00792864	6.54788	down	NRED	chr16	+	72704827	72707258
CUST_1045_PI419771968		AK082033	0.000126	6.5431	down	Fantom_stringent	chr9	+	114318769	114320315
CUST_8600_PI419771968		AK018137	0.000224	6.54307	down	NRED	chr9	+	3904398	3905785
CUST_5261_PI419771968	AK047175	uc008xuj	0.0068413	6.54172	down	UCSC_knowngene	chr5	+	76045217	76048321
CUST_13406_PI419771968		X16935	0.0303296	6.53632	down	NRED	chr14	+	54482806	54807626
CUST_10064_PI419771968		AK036896	0.00616741	6.52595	down	NRED	chr2	+	135485284	135487345
CUST_7558_PI419771968		AK013565	0.0176306	6.52479	down	NRED	chr12	+	25541841	25542734
CUST_10988_PI419771968		AK047496	0.0202458	6.52329	down	NRED	chr1	-	167446804	167448616
CUST_11188_PI419771968		AK049403	0.00446333	6.51755	down	NRED	chr17	-	67301878	67303747
CUST_11815_PI419771968		AK079108	0.00687826	6.51093	down	NRED	chr2	+	49113712	49115468
CUST_12920_PI419771968		AK158356	0.00281633	6.50875	down	NRED	chr2	-	44862570	44864573
CUST_4715_PI419771968	Pip5k1a	uc008qhw	0.0318489	6.50807	down	UCSC_knowngene	chr3	-	94862469	94863922
CUST_8967_PI419771968		AK020287	0.000228	6.48871	down	NRED	chr4	+	53585311	53585906
CUST_2317_PI419771968	AK039862	uc007kcg	0.000222	6.47785	down	UCSC_knowngene	chr11	-	74524036	74527464
CUST_9174_PI419771968		AK020950	0.00705702	6.4685	down	NRED	chr13	-	117640101	117641035
CUST_11458_PI419771968		AK052686	6.74e-05	6.46702	down	NRED	chr16	+	43363576	43578864
CUST_7488_PI419771968		AK012901	0.00101748	6.46522	down	NRED	chr9	-	71831635	71833480
CUST_2430_PI419771968	AK144330	uc007lsd	0.0061911	6.46316	down	UCSC_knowngene	chr11	-	102437712	102440433
CUST_8412_PI419771968		AK017423	0.0128278	6.44854	down	NRED	chr2	+	174157633	174158702
CUST_1516_PI419771968		AK161112	0.000477	6.4457	down	Fantom_stringent	chr1	-	6199948	6204661
CUST_1365_PI419771968		AK147814	0.0197102	6.44361	down	Fantom_stringent	chr10	-	60891622	60895691
CUST_677_PI419771968		AK039268	0.0231389	6.44229	down	Fantom_stringent	chr15	-	101051978	101055581
CUST_9309_PI419771968		AK021411	0.00540806	6.44211	down	NRED	chr17	+	5851040	5851954
CUST_1935_PI419771968	Pde7b	uc007eoc	0.00546366	6.43119	down	UCSC_knowngene	chr10	-	20199432	20444757
CUST_8869_PI419771968		AK019905	0.0156897	6.42958	down	NRED	chr9	+	34558913	34560832
CUST_9980_PI419771968		AK036007	0.000927	6.42333	down	NRED	chr7	+	82834004	82837327
CUST_4987_PI419771968	AK048089	uc008ued	0.00226534	6.40634	down	UCSC_knowngene	chr4	+	114581861	114593723
CUST_12301_PI419771968		AK085151	0.00147682	6.37918	down	NRED	chr2	-	105799908	105803653
CUST_7583_PI419771968		AK013682	0.0409494	6.36181	down	NRED	chrX	-	157239324	157240683
CUST_3515_PI419771968	Cd200	uc007zio	0.00110178	6.35375	down	UCSC_knowngene	chr16	-	45407306	45409166
CUST_11517_PI419771968		AK053153	0.0259386	6.35354	down	NRED	chr4	+	83109195	83111697
CUST_7666_PI419771968		AK014176	0.000592	6.35314	down	NRED	chr15	+	95781467	95782801
CUST_9627_PI419771968		AK032614	0.00063	6.34907	down	NRED	chr10	-	13407011	13409613
CUST_7534_PI419771968		AK013450	0.0210984	6.33873	down	NRED	chr1	+	66803967	66804947
CUST_7625_PI419771968		AK013908	0.00102673	6.33076	down	NRED	chr13	-	108832314	108834311
CUST_12150_PI419771968		AK083427	0.0212741	6.32676	down	NRED	chr19	+	55900229	55903697
CUST_12023_PI419771968		AK082022	0.00244562	6.32641	down	NRED	chr6	-	101266075	101267223
CUST_4176_PI419771968	AK039536	uc008icf	5.02e-05	6.31039	down	UCSC_knowngene	chr19	-	61192541	61216710
CUST_5620_PI419771968	AK009724	uc009csa	0.00793149	6.29937	down	UCSC_knowngene	chr6	-	86433369	86438221
CUST_10184_PI419771968		AK038074	0.00172921	6.298	down	NRED	chr11	-	74731970	74734356
CUST_10214_PI419771968		AK038251	0.000898	6.29251	down	NRED	chr2	-	6529250	6530406
CUST_5036_PI419771968	AK013162	uc008uzj	0.00351943	6.28904	down	UCSC_knowngene	chr4	+	130168255	130169617
CUST_1062_PI419771968		AK083165	0.00301673	6.28639	down	Fantom_stringent	chr11	-	120486437	120490077
CUST_6742_PI419771968	BC042783	uc009tqf	0.00411002	6.28424	down	UCSC_knowngene	chrX	+	72818790	72820607
CUST_10375_PI419771968		AK040093	0.00112351	6.27111	down	NRED	chr7	+	25688067	25688415
CUST_11991_PI419771968		AK081590	0.016932	6.25987	down	NRED	chr7	-	130426450	130429755
CUST_9091_PI419771968		AK020650	0.0261561	6.25757	down	NRED	chr11	+	79351626	79352753
CUST_9057_PI419771968		AK020542	0.0194603	6.25498	down	NRED	chr8	+	84927214	84927618
CUST_246_PI419771968		AK010182	0.00120311	6.2534	down	Fantom_stringent	chr10	-	44786217	44786884
CUST_8437_PI419771968		AK017540	0.010322	6.2522	down	NRED	chr2	-	71194706	71196049
CUST_10876_PI419771968		AK046282	0.0180666	6.2494	down	NRED	chr1	+	172519738	172520596
CUST_11939_PI419771968		AK081027	0.0209398	6.24171	down	NRED	chr19	-	59062769	59065092
CUST_9310_PI419771968		AK027946	0.0120502	6.2375	down	NRED	chr15	-	74582748	74583454
CUST_11876_PI419771968		AK080123	0.00197446	6.23617	down	NRED	chr5	+	9155732	9158045
CUST_1950_PI419771968	AK014660	uc007eqv	0.0184403	6.23317	down	UCSC_knowngene	chr10	-	24309110	24315618
CUST_6072_PI419771968	AK041267	uc009kdm	0.00512473	6.23047	down	UCSC_knowngene	chr7	+	140939282	140944721
CUST_8639_PI419771968		AK018345	9.19e-05	6.22386	down	NRED	chr2	+	5766298	5778466
CUST_12175_PI419771968		AK083728	0.0301137	6.21789	down	NRED	chr14	-	66446660	66450656
CUST_6856_PI419771968		AK003491	0.00396883	6.20644	down	NRED	chr12	+	110834014	110835306
CUST_11904_PI419771968		AK080554	0.0272358	6.20214	down	NRED	chr2	-	155998631	155999859
CUST_11573_PI419771968		AK053579	0.0037074	6.20078	down	NRED	chr15	-	3295226	3533212
CUST_9150_PI419771968		AK020870	0.000697	6.18538	down	NRED	chr16	+	43578557	43578941
CUST_1078_PI419771968		AK083983	0.000856	6.16448	down	Fantom_stringent	chr4	-	56879900	56881095
CUST_5920_PI419771968	AK049871	uc009hnh	0.00457431	6.15854	down	UCSC_knowngene	chr7	-	77417387	77482729
CUST_5808_PI419771968	AK212208	uc009fyf	0.012955	6.15014	down	UCSC_knowngene	chr7	-	29090649	29091034
CUST_12868_PI419771968		AK148585	0.0306527	6.14688	down	NRED	chr18	-	67481042	67503237
CUST_2537_PI419771968	AK050516	uc007mzr	0.00720466	6.14102	down	UCSC_knowngene	chr12	+	8518006	8569487
CUST_2741_PI419771968	Tcrg	uc007pov	0.00560143	6.13933	down	UCSC_knowngene	chr13	-	19396520	19428643
CUST_7588_PI419771968		AK013706	0.000159	6.13362	down	NRED	chrX	-	148749758	148750260
CUST_7525_PI419771968		AK013346	0.00087	6.12488	down	NRED	chrX	-	148729370	148730847
CUST_1040_PI419771968		AK081614	0.0019119	6.11705	down	Fantom_stringent	chr6	+	93191713	93194198
CUST_9671_PI419771968		AK033099	0.00646033	6.11671	down	NRED	chr8	-	67208695	67210086
CUST_8672_PI419771968		AK018491	0.0255269	6.10994	down	NRED	chr15	-	34595026	34595807
CUST_5417_PI419771968	Ywhag	uc008zzh	0.00798772	6.10792	down	UCSC_knowngene	chr5	-	136406549	136410394
CUST_7552_PI419771968		AK013547	0.00281199	6.10384	down	NRED	chr6	+	37946589	37947241
CUST_7602_PI419771968		AK013767	0.00952362	6.1025	down	NRED	chr15	+	92180899	92181596
CUST_11742_PI419771968		AK077974	0.00437908	6.09858	down	NRED	chr10	-	20279842	20281966
CUST_4127_PI419771968	AK049068	uc008hod	0.00250676	6.098	down	UCSC_knowngene	chr19	+	42853521	42855944
CUST_6554_PI419771968	AK162386	uc009qwy	0.0318364	6.09179	down	UCSC_knowngene	chr9	-	85713847	85737738
CUST_9865_PI419771968		AK034945	0.00904778	6.08235	down	NRED	chr14	+	77902688	77905352
CUST_8703_PI419771968		AK018650	0.00955514	6.07933	down	NRED	chr1	+	161219189	161219938
CUST_9487_PI419771968		AK031157	0.00918844	6.05796	down	NRED	chr4	-	56813631	56815149
CUST_10492_PI419771968		AK041851	0.0050235	6.05458	down	NRED	chr17	-	67069476	67070358
CUST_3509_PI419771968	AK038731	uc007zgh	0.01084	6.0492	down	UCSC_knowngene	chr16	+	43619100	43622028
CUST_672_PI419771968		AK039132	0.000482	6.04515	down	Fantom_stringent	chr2	+	91898875	91902320
CUST_10337_PI419771968		AK039661	0.0107207	6.045	down	NRED	chr6	-	147037831	147040372
CUST_9573_PI419771968		AK031940	0.0122796	6.0429	down	NRED	chr1	-	183840838	183842728
CUST_7487_PI419771968		AK012892	0.0020969	6.0374	down	NRED	chr4	-	34802747	34804100
CUST_3476_PI419771968	AK004252	uc007yua	0.00285111	6.03405	down	UCSC_knowngene	chr16	-	24391697	24393528
CUST_3561_PI419771968	AK148800	uc007zsh	0.00364156	6.02086	down	UCSC_knowngene	chr16	+	77329449	77598776
CUST_8540_PI419771968		BC034330	0.00271257	6.01809	down	NRED	chr14	+	56514762	56517612
CUST_9667_PI419771968		AK033078	0.00182882	6.0164	down	NRED	chr14	-	62237031	62238588
CUST_10800_PI419771968		AK045275	0.0123302	6.00476	down	NRED	chr2	-	73113247	73116038
CUST_1973_PI419771968	AK145144	uc007ezc	0.0193428	6.00076	down	UCSC_knowngene	chr10	-	42582612	42584505
CUST_10333_PI419771968		AK039609	0.013954	6.00032	down	NRED	chr2	-	30057881	30061618
CUST_3662_PI419771968	AK164331	uc008apc	0.0302789	5.98925	down	UCSC_knowngene	chr17	+	17431406	17455068
CUST_5923_PI419771968	AK020061	uc009hnn	0.0157689	5.97622	down	UCSC_knowngene	chr7	+	78361934	78369295
CUST_11001_PI419771968		AK047590	0.000981	5.96986	down	NRED	chr10	-	85791248	85793931
CUST_11038_PI419771968		AK047905	0.000213	5.95658	down	NRED	chr17	-	67196991	67200829
CUST_2464_PI419771968	BC006965	uc007mea	5.22e-05	5.95294	down	UCSC_knowngene	chr11	-	112548956	112572655
CUST_9556_PI419771968		AK031731	0.0189107	5.95191	down	NRED	chr2	-	75538560	75542038
CUST_9094_PI419771968		AK020657	0.00573544	5.94776	down	NRED	chr6	-	101265448	101266542
CUST_5324_PI419771968	AK042124	uc008yms	0.0441786	5.94101	down	UCSC_knowngene	chr5	-	108088115	108117034
CUST_11412_PI419771968		AK052227	0.0171041	5.94077	down	NRED	chr18	+	69739028	69742863
CUST_11680_PI419771968		AK076695	0.00602057	5.93917	down	NRED	chr16	+	43465496	43468364
CUST_2704_PI419771968	AK054515	uc007peo	0.00501536	5.93204	down	UCSC_knowngene	chr12	-	113629736	113644023
CUST_11139_PI419771968		AK048761	0.000537	5.93082	down	NRED	chr7	+	119953226	119956349
CUST_11084_PI419771968		AK048317	0.0379447	5.9295	down	NRED	chr7	-	74429360	74431948
CUST_11845_PI419771968		AK079628	0.00262019	5.91009	down	NRED	chr7	-	117128917	117129801
CUST_591_PI419771968		AK032130	0.00186843	5.90043	down	Fantom_stringent	chr3	+	126546287	126549243
CUST_2087_PI419771968	AK082467	uc007guc	0.00165315	5.89087	down	UCSC_knowngene	chr10	-	91624892	91627915
CUST_13257_PI419771968		BC052788	0.000905	5.88919	down	NRED	chr7	+	71031248	71032531
CUST_8447_PI419771968		AK017601	0.00216088	5.88228	down	NRED	chr18	+	69752434	69752778
CUST_6720_PI419771968	AK132460	uc009tdp	0.00144375	5.8754	down	UCSC_knowngene	chrX	-	47912843	47945262
CUST_3724_PI419771968	AK036614	uc008bzl	0.00319547	5.86807	down	UCSC_knowngene	chr17	-	33831161	33833191
CUST_8581_PI419771968		AK018023	0.00314125	5.861	down	NRED	chr7	+	82756725	82758180
CUST_505_PI419771968		AK020060	0.00138176	5.85762	down	Fantom_stringent	chr19	-	4929720	4930579
CUST_10933_PI419771968		AK046963	0.00121346	5.85568	down	NRED	chr5	-	4819505	4822627
CUST_8476_PI419771968		AK017867	0.000764	5.84608	down	NRED	chr2	+	115593737	115595748
CUST_2208_PI419771968	AK162774	uc007idq	0.00813554	5.84419	down	UCSC_knowngene	chr11	+	21141342	21145241
CUST_9035_PI419771968		AK020500	0.00933789	5.84071	down	NRED	chr9	-	44186715	44187379
CUST_3558_PI419771968	AK048031	uc007zse	0.000917	5.83212	down	UCSC_knowngene	chr16	+	77236561	77598776
CUST_10111_PI419771968		AK037391	0.000478	5.82698	down	NRED	chr2	+	152553443	152556535
CUST_6709_PI419771968	LAMP2	uc009szz	0.0198915	5.82333	down	UCSC_knowngene	chrX	-	35806066	35809632
CUST_13340_PI419771968		DQ113646	0.00236634	5.81699	down	NRED	chr5	-	129085052	129091253
CUST_9997_PI419771968		AK036130	0.00173421	5.81287	down	NRED	chr12	+	84827084	84829972
CUST_10887_PI419771968		AK046545	0.00531618	5.80405	down	NRED	chr8	-	37673778	37675870
CUST_2171_PI419771968	AK050795	uc007hry	0.00182058	5.79561	down	UCSC_knowngene	chr11	+	3037139	3039650
CUST_9591_PI419771968		AK032274	0.00464309	5.78646	down	NRED	chr18	-	21373341	21376026
CUST_12683_PI419771968		AK134035	0.00785743	5.7698	down	NRED	chr18	-	10150973	10152889
CUST_5520_PI419771968	Tcrb	uc009bpc	0.00358426	5.7697	down	UCSC_knowngene	chr6	+	41483862	41489880
CUST_11805_PI419771968		AK078845	0.0013162	5.76584	down	NRED	chr2	+	78724435	78726204
CUST_12513_PI419771968		AK087769	0.00307098	5.74554	down	NRED	chrX	+	95344107	95344738
CUST_7580_PI419771968		AK013658	0.0044364	5.7438	down	NRED	chr15	-	44547993	44549797
CUST_5041_PI419771968	AK155592	uc008vbk	0.000663	5.73787	down	UCSC_knowngene	chr4	-	132061990	132066414
CUST_9236_PI419771968		AK021120	0.000565	5.73781	down	NRED	chr18	+	69752256	69752713
CUST_12841_PI419771968		AK144510	0.00619251	5.73661	down	NRED	chr5	-	149770464	149771256
CUST_607_PI419771968		AK033315	0.00178097	5.73288	down	Fantom_stringent	chr2	+	152460553	152463732
CUST_6781_PI419771968	AK208404	uc009uim	0.0366342	5.73271	down	UCSC_knowngene	chrX	-	132806242	132806503
CUST_9540_PI419771968		AK031515	0.00322385	5.73183	down	NRED	chr18	+	69513252	69516152
CUST_7406_PI419771968		AK011493	0.00926247	5.73162	down	NRED	chr7	-	4086344	4088444
CUST_12399_PI419771968		AK086371	0.00905502	5.72654	down	NRED	chr9	-	92435049	92437610
CUST_12190_PI419771968		AK083865	0.00301593	5.72495	down	NRED	chr4	-	91019655	91023912
CUST_11422_PI419771968		AK052336	0.0119804	5.72248	down	NRED	chr8	+	46870095	46873921
CUST_11167_PI419771968		AK048977	0.000823	5.72221	down	NRED	chr12	+	91444086	91445769
CUST_8572_PI419771968		AK017987	0.00374222	5.71902	down	NRED	chr9	-	71758302	71759462
CUST_12405_PI419771968		AK086410	0.00354937	5.71359	down	NRED	chr10	-	13486664	13489436
CUST_12409_PI419771968		AK086422	0.0277076	5.70679	down	NRED	chr3	-	51676911	51679758
CUST_1108_PI419771968		AK085198	0.00290666	5.69942	down	Fantom_stringent	chr1	-	170085020	170085835
CUST_12635_PI419771968		AK090292	0.0302228	5.68787	down	NRED	chr17	+	21653676	21667959
CUST_11961_PI419771968		AK081284	0.00231564	5.68539	down	NRED	chr2	-	6924199	6928888
CUST_1583_PI419771968		AK170049	0.0181609	5.67454	down	Fantom_stringent	chr6	-	83718879	83720526
CUST_12654_PI419771968		AK132110	0.00838179	5.67333	down	NRED	chr2	+	164737389	164738433
CUST_13330_PI419771968		BC106197	0.0142089	5.65827	down	NRED	chr2	+	176583320	176593323
CUST_9632_PI419771968		AK032649	0.0130066	5.65224	down	NRED	chr12	-	84825136	84828671
CUST_2275_PI419771968	AK007947	uc007jfe	0.0160453	5.64896	down	UCSC_knowngene	chr11	+	59735000	59735391
CUST_10237_PI419771968		AK038502	0.00100293	5.63385	down	NRED	chr11	+	62138977	62141804
CUST_10764_PI419771968		AK044923	0.00129668	5.63046	down	NRED	chrX	+	135461720	135463983
CUST_2509_PI419771968	AK084828	uc007msc	0.00144963	5.62961	down	UCSC_knowngene	chr11	-	120076402	120078307
CUST_3475_PI419771968	AK144897	uc007ytv	0.00827627	5.62794	down	UCSC_knowngene	chr16	+	23520391	23560153
CUST_768_PI419771968		AK045751	0.00477218	5.6224	down	Fantom_stringent	chr11	+	5737224	5738728
CUST_12269_PI419771968		AK084899	0.00327969	5.61948	down	NRED	chr18	-	55142088	55144765
CUST_11571_PI419771968		AK053561	0.00359014	5.61294	down	NRED	chr10	-	20252187	20255222
CUST_11757_PI419771968		AK078202	0.00111815	5.59997	down	NRED	chr7	+	108356178	108359537
CUST_1379_PI419771968		AK149239	0.00670685	5.58689	down	Fantom_stringent	chr18	-	43480645	43482279
CUST_6757_PI419771968	AK050201	uc009tzr	0.012378	5.58557	down	UCSC_knowngene	chrX	+	100689133	100701764
CUST_4126_PI419771968	Hps1	uc008hoa	0.00210134	5.58075	down	UCSC_knowngene	chr19	-	42832570	42834340
CUST_11617_PI419771968		AK054167	0.000845	5.57939	down	NRED	chr1	+	55499150	55502774
CUST_6799_PI419771968	AK008724	uc009ura	0.00120366	5.57862	down	UCSC_knowngene	chrX	+	150158132	150175807
CUST_10789_PI419771968		AK045155	0.00660154	5.57637	down	NRED	chr14	-	61636972	61640166
CUST_7679_PI419771968		AK014284	0.00459664	5.56946	down	NRED	chr5	+	142069835	142071032
CUST_2924_PI419771968	AK136919	uc007ruh	0.00327762	5.56633	down	UCSC_knowngene	chr13	+	107822855	107845577
CUST_9817_PI419771968		AK034561	0.00759301	5.56245	down	NRED	chr18	+	9215037	9218135
CUST_6885_PI419771968		AK004374	6.43e-06	5.56149	down	NRED	chrX	+	132517201	132518184
CUST_10594_PI419771968		AK043012	0.0103015	5.55718	down	NRED	chr4	-	97249023	97251315
CUST_9717_PI419771968		AK033438	5.9e-05	5.55161	down	NRED	chr3	-	143860135	143862226
CUST_5752_PI419771968	AK087382	uc009ets	0.00766886	5.54288	down	UCSC_knowngene	chr6	+	148893388	148895651
CUST_1140_PI419771968		AK087447	0.000325	5.54204	down	Fantom_stringent	chr5	-	114387110	114389958
CUST_9534_PI419771968		AK031454	0.0269651	5.54092	down	NRED	chr15	+	85060671	85064690
CUST_11260_PI419771968		AK050725	0.00700008	5.53948	down	NRED	chr9	+	96188775	96191926
CUST_12819_PI419771968		AK142855	0.02598	5.53913	down	NRED	chr16	-	64761981	64764995
CUST_7494_PI419771968		AK012964	0.000585	5.53428	down	NRED	chr11	-	44433208	44434151
CUST_12611_PI419771968		AK089870	0.00478073	5.53106	down	NRED	chr6	-	86211548	86213908
CUST_13532_PI419771968	Snhg1	NR_002896	0.0289789	5.53101	down	RefSeq_NR	chr19	+	8797976	8800816
CUST_3374_PI419771968	BC119421	uc007xig	0.0212935	5.51961	down	UCSC_knowngene	chr15	-	91736664	91736947
CUST_12262_PI419771968		AK084864	0.00842072	5.51437	down	NRED	chr6	+	82714275	82717282
CUST_10360_PI419771968		AK039909	0.0155023	5.5118	down	NRED	chr1	+	191167309	191168769
CUST_7347_PI419771968		AK009865	0.000422	5.5091	down	NRED	chr16	-	48993597	48994215
CUST_13242_PI419771968		BC049988	0.0109066	5.50536	down	NRED	chr1	-	99927700	99932252
CUST_12423_PI419771968		AK086575	0.0130485	5.48508	down	NRED	chr2	+	3345369	3347234
CUST_11947_PI419771968		AK081084	0.00771967	5.48387	down	NRED	chr17	-	66848465	66852271
CUST_9464_PI419771968		AK030655	0.00177001	5.48057	down	NRED	chr11	+	54924561	54926528
CUST_1313_PI419771968		AK140411	0.00216182	5.47576	down	Fantom_stringent	chr4	-	19536334	19538876
CUST_1375_PI419771968		AK148627	0.00201056	5.47539	down	Fantom_stringent	chrX	+	148710968	148713640
CUST_11004_PI419771968		AK047630	0.00532498	5.46705	down	NRED	chr15	-	7077224	7079467
CUST_11113_PI419771968		AK048564	0.00406199	5.45772	down	NRED	chr1	+	4874402	4877121
CUST_1641_PI419771968	AK040602	uc007atk	0.00326327	5.45206	down	UCSC_knowngene	chr1	-	39604432	39608847
CUST_5173_PI419771968	AK149295	uc008wsy	0.000626	5.45094	down	UCSC_knowngene	chr5	+	25005758	25008367
CUST_4620_PI419771968	AK172713	uc008ozf	0.00352413	5.44506	down	UCSC_knowngene	chr3	+	35971100	35973162
CUST_5040_PI419771968	AK009175	uc008vaz	0.00161922	5.44075	down	UCSC_knowngene	chr4	+	131864592	131866937
CUST_2435_PI419771968	AK010390	uc007lta	5.08e-05	5.4323	down	UCSC_knowngene	chr11	-	102819622	102825468
CUST_11911_PI419771968		AK080623	0.0256492	5.43211	down	NRED	chr8	-	74887112	74887568
CUST_10199_PI419771968		AK038172	0.0180098	5.42883	down	NRED	chr4	-	6870763	6875475
CUST_12313_PI419771968		AK085312	0.0328141	5.42816	down	NRED	chr15	+	94077632	94086037
CUST_9771_PI419771968		AK034202	0.00350675	5.42786	down	NRED	chr9	+	41396576	41400820
CUST_9785_PI419771968		AK034262	0.00534274	5.42467	down	NRED	chr6	-	77231103	77235828
CUST_12800_PI419771968		AK142037	0.00255247	5.42335	down	NRED	chr8	-	49634769	49639449
CUST_9966_PI419771968		AK035881	0.000159	5.41093	down	NRED	chr4	+	119486935	119671037
CUST_13470_PI419771968	Btbd19	NR_024078	0.0216581	5.40743	down	RefSeq_NR	chr4	-	116791822	116798330
CUST_12492_PI419771968		AK087385	0.00325633	5.40179	down	NRED	chr17	+	21877465	21879333
CUST_3564_PI419771968	AK033222	uc007zsk	0.00123338	5.40063	down	UCSC_knowngene	chr16	+	77500750	77598776
CUST_9007_PI419771968		AK020414	0.00466341	5.39503	down	NRED	chr10	+	5920842	5922012
CUST_630_PI419771968		AK034527	0.000104	5.39474	down	Fantom_stringent	chr16	-	45157485	45158777
CUST_9719_PI419771968		AK033485	0.00441468	5.38782	down	NRED	chr1	-	54532201	54534442
CUST_10747_PI419771968		AK044726	0.00865594	5.37896	down	NRED	chr4	+	131630611	131632907
CUST_9072_PI419771968		AK020571	0.0148521	5.37126	down	NRED	chr7	-	133792056	133793086
CUST_4841_PI419771968	Chchd7	uc008rws	0.00321965	5.37073	down	UCSC_knowngene	chr4	+	3866060	3870670
CUST_11204_PI419771968		AK049654	6.57e-05	5.36914	down	NRED	chr6	+	149494403	149498718
CUST_10812_PI419771968		AK045358	0.0161779	5.35909	down	NRED	chr8	-	23692419	23696593
CUST_286_PI419771968		AK012243	0.00423537	5.35832	down	Fantom_stringent	chr6	+	86354228	86355163
CUST_13424_PI419771968		Y17854	0.00124507	5.35811	down	NRED	chr12	+	72950184	72950565
CUST_165_PI419771968		AK007691	0.00259458	5.35512	down	Fantom_stringent	chr4	+	149022141	149023007
CUST_1842_PI419771968	AK028767	uc007dlt	0.00484303	5.35258	down	UCSC_knowngene	chr1	-	171902410	171905839
CUST_9716_PI419771968		AK033415	0.0256866	5.35115	down	NRED	chr5	+	146053638	146055877
CUST_11007_PI419771968		AK047643	0.0114724	5.34994	down	NRED	chr12	+	39573237	39576076
CUST_9371_PI419771968		AK029225	0.0124292	5.33877	down	NRED	chr5	+	136185619	136189081
CUST_11985_PI419771968		AK081553	0.0106464	5.33612	down	NRED	chr17	+	71100016	71103004
CUST_12776_PI419771968		AK140518	0.0203533	5.32617	down	NRED	chr5	-	143765525	143767880
CUST_10663_PI419771968		AK043752	0.0198214	5.32108	down	NRED	chr15	-	53320224	53323216
CUST_2757_PI419771968	AK034200	uc007pwr	0.0355576	5.31262	down	UCSC_knowngene	chr13	+	25029279	25033286
CUST_2909_PI419771968	AK052076	uc007rpo	0.00686255	5.30664	down	UCSC_knowngene	chr13	-	100166878	100182831
CUST_10757_PI419771968		AK044847	0.00815876	5.30605	down	NRED	chr10	+	28209045	28212392
CUST_4894_PI419771968	BC055065	uc008srw	0.00633811	5.29529	down	UCSC_knowngene	chr4	+	44314097	44316768
CUST_5368_PI419771968	AK049160	uc008zfa	0.0424197	5.28813	down	UCSC_knowngene	chr5	+	116888728	116915496
CUST_8651_PI419771968		AK018417	0.0226862	5.28727	down	NRED	chr5	+	111538420	111540142
CUST_11821_PI419771968		AK079240	0.00124896	5.28509	down	NRED	chr17	+	3134730	3136632
CUST_10187_PI419771968		AK038091	0.0427807	5.28468	down	NRED	chr11	-	52084887	52089239
CUST_12767_PI419771968		AK140063	0.0346898	5.28289	down	NRED	chr12	-	84627827	84630729
CUST_9350_PI419771968		AK028918	4.6e-05	5.28182	down	NRED	chr9	-	55355741	55358492
CUST_2376_PI419771968	AK002838	uc007kvp	0.0163597	5.27825	down	UCSC_knowngene	chr11	+	88480564	88484740
CUST_12070_PI419771968		AK082420	0.00390193	5.26659	down	NRED	chr4	-	56777214	56779425
CUST_9996_PI419771968		AK036123	0.0391133	5.26361	down	NRED	chr6	-	36787381	36788944
CUST_10127_PI419771968		AK037549	0.0125863	5.25389	down	NRED	chr15	+	81866861	81869996
CUST_13185_PI419771968		BC037039	0.00405407	5.25333	down	NRED	chr18	-	37965373	37967576
CUST_12609_PI419771968		AK089859	0.00063	5.24954	down	NRED	chr18	-	5162877	5165729
CUST_10518_PI419771968		AK042118	0.00230721	5.248	down	NRED	chr5	-	76568123	76569578
CUST_438_PI419771968		AK017913	0.00140795	5.2455	down	Fantom_stringent	chr4	+	132195016	132196185
CUST_4263_PI419771968	AK138201	uc008jko	0.00335833	5.24438	down	UCSC_knowngene	chr2	-	35405057	35414222
CUST_10979_PI419771968		AK047420	0.00124228	5.24225	down	NRED	chr4	+	126370437	126371182
CUST_11086_PI419771968		AK048328	0.0105054	5.24111	down	NRED	chr2	+	130972184	130975646
CUST_12457_PI419771968		AK087003	0.0304124	5.23905	down	NRED	chr2	-	60441142	60442004
CUST_7561_PI419771968		AK013575	0.00825066	5.23482	down	NRED	chr5	+	65782784	65787422
CUST_7609_PI419771968		AK013795	0.00786298	5.22941	down	NRED	chr2	+	129422062	129422955
CUST_11137_PI419771968		AK048747	0.00673682	5.22235	down	NRED	chr3	+	51363957	51371036
CUST_8419_PI419771968		AK017446	0.00574771	5.21504	down	NRED	chr3	+	106380597	106382208
CUST_7447_PI419771968		AK012039	0.0155201	5.209	down	NRED	chr18	+	59123227	59124342
CUST_5646_PI419771968	Slc25a26	uc009czt	0.00949649	5.20564	down	UCSC_knowngene	chr6	+	94457507	94546083
CUST_11834_PI419771968		AK079493	0.000613	5.20459	down	NRED	chr8	+	117346549	117351689
CUST_9209_PI419771968		AK021051	0.0044577	5.20308	down	NRED	chr10	-	31998982	31999499
CUST_6210_PI419771968	AK076396	uc009lxi	0.00750706	5.20121	down	UCSC_knowngene	chr8	+	72178388	72186786
CUST_11392_PI419771968		AK052050	0.00149731	5.19901	down	NRED	chr14	+	35860458	35863183
CUST_7507_PI419771968		AK013077	0.0157344	5.19794	down	NRED	chr9	-	82979576	82981604
CUST_7459_PI419771968		AK012244	0.0213441	5.19596	down	NRED	chr12	-	100598080	100600238
CUST_11606_PI419771968		AK053952	0.0373806	5.19516	down	NRED	chr18	+	33424783	33427175
CUST_13127_PI419771968		BC019134	0.00250116	5.19494	down	NRED	chr9	+	41392643	41394276
CUST_8925_PI419771968		AK020156	0.00190406	5.1928	down	NRED	chrX	+	109424991	109426191
CUST_10810_PI419771968		AK045346	0.0127253	5.19186	down	NRED	chr9	+	92496179	92497455
CUST_3114_PI419771968	AK139063	uc007ugi	0.000143	5.19103	down	UCSC_knowngene	chr14	-	62294849	62301165
CUST_2833_PI419771968		BC066226	0.0118492	5.18948	down	UCSC_knowngene	chr13	+	61872943	61902020
CUST_1728_PI419771968	A730008H23Rik	uc007byo	0.00574553	5.1892	down	UCSC_knowngene	chr1	-	90171695	90172760
CUST_2266_PI419771968	AK162965	uc007jdh	0.000752	5.18265	down	UCSC_knowngene	chr11	-	59011294	59015887
CUST_10946_PI419771968		AK047121	0.00188149	5.17959	down	NRED	chr2	-	101944607	101946919
CUST_11927_PI419771968		AK080924	0.00546703	5.17862	down	NRED	chr6	+	51521428	51525708
CUST_9026_PI419771968		AK020464	0.00128757	5.17352	down	NRED	chr7	-	4025756	4072046
CUST_4270_PI419771968	mKIAA0569	uc008jph	0.0411424	5.16783	down	UCSC_knowngene	chr2	-	44951780	44966253
CUST_3726_PI419771968	AK136742	uc008bzz	0.000847	5.16692	down	UCSC_knowngene	chr17	-	34045127	34046123
CUST_3112_PI419771968	AK143097	uc007ugf	0.0317329	5.1662	down	UCSC_knowngene	chr14	-	62246651	62250729
CUST_10750_PI419771968		AK044751	0.0013664	5.16567	down	NRED	chr2	+	29569389	29572834
CUST_8532_PI419771968		BC029975	0.00398028	5.16536	down	NRED	chr16	-	4762196	4764657
CUST_895_PI419771968		AK076131	0.000233	5.16505	down	Fantom_stringent	chr1	-	183832694	183834125
CUST_1678_PI419771968	Cflar	uc007bcr	0.0089829	5.16295	down	UCSC_knowngene	chr1	+	58770139	58779914
CUST_11029_PI419771968		AK047823	0.0027135	5.16007	down	NRED	chr11	+	115814058	115817575
CUST_1000_PI419771968		AK080243	0.001858	5.15192	down	Fantom_stringent	chr11	+	96668514	96669461
CUST_12586_PI419771968		AK089612	0.00596413	5.14762	down	NRED	chr8	-	89389398	89393422
CUST_13234_PI419771968		BC048953	0.0231892	5.1391	down	NRED	chr16	+	43634944	43638095
CUST_9844_PI419771968		AK034767	0.00115682	5.13828	down	NRED	chr14	-	47497673	47500263
CUST_8605_PI419771968		AK018186	0.000667	5.12674	down	NRED	chr15	+	59318434	59320181
CUST_12555_PI419771968		AK089149	0.00136564	5.12435	down	NRED	chr10	-	109327172	109328452
CUST_9629_PI419771968		AK032623	0.0073109	5.12279	down	NRED	chr12	+	90849248	90853469
CUST_10272_PI419771968		AK038861	0.00213074	5.1226	down	NRED	chr7	+	97535868	97537546
CUST_7579_PI419771968		AK013657	0.0152686	5.12184	down	NRED	chr11	-	33742308	33743562
CUST_12479_PI419771968		AK087250	0.0152851	5.1171	down	NRED	chr5	+	36256338	36258371
CUST_2072_PI419771968	AK090016	uc007gqf	0.000209	5.10704	down	UCSC_knowngene	chr10	+	86148345	86152699
CUST_9322_PI419771968		AK028406	0.013275	5.09884	down	NRED	chr7	+	124814077	124817091
CUST_13488_PI419771968	1810014B01Rik	NR_015572	0.000154	5.097	down	RefSeq_NR	chr10	+	86148271	86152699
CUST_1536_PI419771968		AK162901	0.00216328	5.08178	down	Fantom_stringent	chrX	+	95515514	95518551
CUST_12290_PI419771968		AK085079	0.00159505	5.07939	down	NRED	chrX	+	17769156	17772928
CUST_11437_PI419771968		AK052510	0.0119427	5.07877	down	NRED	chr18	-	56471644	56473330
CUST_9991_PI419771968		AK036075	0.00871808	5.07674	down	NRED	chr18	+	69804968	69808707
CUST_6154_PI419771968	AK044376	uc009ldl	0.00993347	5.07109	down	UCSC_knowngene	chr8	-	23744860	23746759
CUST_11323_PI419771968		AK051489	0.00092	5.07065	down	NRED	chr13	+	18897452	18901870
CUST_3944_PI419771968	IIGP	uc008fab	0.0205357	5.06721	down	UCSC_knowngene	chr18	+	60535681	60538328
CUST_13192_PI419771968		BC037747	0.0489996	5.06708	down	NRED	chr6	+	29375931	29376948
CUST_9561_PI419771968		AK031784	0.0202195	5.05544	down	NRED	chrX	-	159221390	159223859
CUST_12732_PI419771968		AK137938	0.00151115	5.05383	down	NRED	chr14	-	56283881	56286994
CUST_8365_PI419771968		AK017178	0.0473194	5.05197	down	NRED	chrX	-	45794781	45796288
CUST_12192_PI419771968		AK083870	0.0238383	5.0485	down	NRED	chr6	+	33743247	33747720
CUST_12363_PI419771968		AK085973	0.0241086	5.04775	down	NRED	chr7	-	19926316	19927864
CUST_4851_PI419771968	AK080292	uc008rzc	0.0316891	5.04594	down	UCSC_knowngene	chr4	-	11103110	11118421
CUST_9502_PI419771968		AK031288	0.000189	5.04313	down	NRED	chr14	-	69981560	69991180
CUST_587_PI419771968		AK031998	0.00036	5.04106	down	Fantom_stringent	chr6	-	54455887	54457912
CUST_6156_PI419771968	IKKbeta	uc009ldv	0.000786	5.041	down	UCSC_knowngene	chr8	-	23812926	23817035
CUST_7236_PI419771968		AK008061	0.040715	5.04093	down	NRED	chr4	+	80560252	80560714
CUST_12970_PI419771968		AK163795	0.00179212	5.03384	down	NRED	chr7	-	135837750	135840320
CUST_8571_PI419771968		AK017986	0.00155311	5.02358	down	NRED	chr2	+	130836614	130838107
CUST_9622_PI419771968		AK032538	0.00448306	5.02198	down	NRED	chr6	+	5904962	5908032
CUST_11600_PI419771968		AK053912	0.00319411	5.01706	down	NRED	chr4	+	132609407	132613089
CUST_10289_PI419771968		AK039045	0.00154037	5.01273	down	NRED	chr10	-	67629265	67629908
CUST_12865_PI419771968		AK148051	0.0292184	5.006	down	NRED	chr5	-	149801631	149806790
CUST_6059_PI419771968	AK079777	uc009jxt	0.0012495	5.0059	down	UCSC_knowngene	chr7	+	135126592	135128401
CUST_8394_PI419771968		AK017326	0.000739	5.00303	down	NRED	chr3	-	51875510	51877309
