# Supplementary material for: Long Non-Coding RNA Expression Profiling of Mouse Testis during Postnatal Development
Source: PLoS One. 2013 Oct 10;8(10):e75750. doi: 10.1371/journal.pone.0075750 (PMC3794988; doi:10.1371/journal.pone.0075750)
Supplement: Table S4 — mRNAs differentially expressed in neonatal and adult mouse testis. (XLS) [file pone.0075750.s007.xls]

## Sheet: Up-regulated
Probe ID	p-value	FCAbsolute	Regulation	Gene Symbol	GenBank Accession	Description
CUST_21620_PI419772161	0.000442528	34797.6	up	Spz1	NM_030237	Mus musculus spermatogenic leucine zipper 1 (Spz1), mRNA [NM_030237]
CUST_4764_PI419772161	0.00027464	28054.7	up	H1fnt	NM_027304	Mus musculus H1 histone family, member N, testis-specific (H1fnt), mRNA [NM_027304]
CUST_2828_PI419772161	0.000282927	25478.6	up	1700010M22Rik	NM_025490	Mus musculus RIKEN cDNA 1700010M22 gene (1700010M22Rik), mRNA [NM_025490]
CUST_738_PI419772161	1.47391e-05	24957.1	up	Iqcf3	NM_026645	Mus musculus IQ motif containing F3 (Iqcf3), mRNA [NM_026645]
CUST_12405_PI419772161	3.40452e-05	19052.1	up	Tmco5	NM_026104	Mus musculus transmembrane and coiled-coil domains 5 (Tmco5), mRNA [NM_026104]
CUST_9030_PI419772161	0.00062929	18684	up	Gk2	NM_010294	Mus musculus glycerol kinase 2 (Gk2), mRNA [NM_010294]
CUST_4092_PI419772161	0.000274913	17801.5	up	Ropn1	NM_030744	Mus musculus ropporin, rhophilin associated protein 1 (Ropn1), mRNA [NM_030744]
CUST_82_PI419772161	0.000539435	17309	up	LOC382133	NM_207162	hypothetical protein LOC382133
CUST_9042_PI419772161	0.000273116	17260.9	up	Allc	NM_053156	allantoicase
CUST_17169_PI419772161	0.000333383	17068.9	up	Prm2	NM_008933	Mus musculus protamine 2 (Prm2), mRNA [NM_008933]
CUST_7455_PI419772161	0.000227278	16916.1	up	Gtsf1l	NM_026630	Mus musculus gametocyte specific factor 1-like (Gtsf1l), mRNA [NM_026630]
CUST_2953_PI419772161	0.000324615	16568.3	up	Smcp	NM_008574	Mus musculus sperm mitochondria-associated cysteine-rich protein (Smcp), nuclear gene encoding mitochondrial protein, mRNA [NM_008574]
CUST_784_PI419772161	0.000511135	16331.5	up	Ccdc54	NM_027046	Mus musculus coiled-coil domain containing 54 (Ccdc54), mRNA [NM_027046]
CUST_9309_PI419772161	0.000707247	16122.7	up	Nt5c1b	NM_027588	Mus musculus 5'-nucleotidase, cytosolic IB (Nt5c1b), mRNA [NM_027588]
CUST_196_PI419772161	0.000366181	15395.2	up	1700015E13Rik	NM_001039593	Mus musculus RIKEN cDNA 1700015E13 gene (1700015E13Rik), mRNA [NM_001039593]
CUST_5666_PI419772161	3.44849e-05	15145.5	up	1700009N14Rik	NM_001081095	Mus musculus RIKEN cDNA 1700009N14 gene (1700009N14Rik), mRNA [NM_001081095]
CUST_6407_PI419772161	0.000304857	14793.3	up	Slc9a10	NM_198106	Mus musculus solute carrier family 9, member 10 (Slc9a10), mRNA [NM_198106]
CUST_1926_PI419772161	0.000502739	14590.5	up	Ubqlnl	NM_198624	Mus musculus ubiquilin-like (Ubqlnl), mRNA [NM_198624]
CUST_759_PI419772161	0.000162198	14208	up	1700012A03Rik	NM_029587	Mus musculus RIKEN cDNA 1700012A03 gene (1700012A03Rik), mRNA [NM_029587]
CUST_17713_PI419772161	0.000726025	13955	up	LOC100041223	NM_001160141	hypothetical protein LOC100041223
CUST_20115_PI419772161	9.40646e-05	13162.5	up	Nipsnap3a	NM_028529	Mus musculus nipsnap homolog 3A (C. elegans) (Nipsnap3a), mRNA [NM_028529]
CUST_425_PI419772161	0.000507714	12856	up	1700013G24Rik	NM_027063	Mus musculus RIKEN cDNA 1700013G24 gene (1700013G24Rik), mRNA [NM_027063]
CUST_4246_PI419772161	0.000163258	12581.9	up	Slco6c1	NM_028942	Mus musculus solute carrier organic anion transporter family, member 6c1 (Slco6c1), mRNA [NM_028942]
CUST_16191_PI419772161	0.000797775	12182.3	up	Tnp2	NM_013694	Mus musculus transition protein 2 (Tnp2), mRNA [NM_013694]
CUST_753_PI419772161	2.41568e-06	12133.9	up	MGC107098	NM_001017393	hypothetical protein LOC434935
CUST_17714_PI419772161	0.000292071	11992.8	up	LOC100041256	NM_001160142	hypothetical protein LOC100041256
CUST_547_PI419772161	8.72315e-05	11952.1	up	1700067P10Rik	NM_026625	Mus musculus RIKEN cDNA 1700067P10 gene (1700067P10Rik), mRNA [NM_026625]
CUST_23_PI419772161	0.00133259	11831.2	up	1700034E13Rik	NM_030097	Mus musculus RIKEN cDNA 1700034E13 gene (1700034E13Rik), mRNA [NM_030097]
CUST_1086_PI419772161	0.000671653	11370.7	up	1700042G07Rik	NM_001099295	Mus musculus RIKEN cDNA 1700042G07 gene (1700042G07Rik), mRNA [NM_001099295]
CUST_72_PI419772161	0.00135454	11364.7	up	BC061237	NM_198677	Mus musculus cDNA sequence BC061237 (BC061237), mRNA [NM_198677]
CUST_8084_PI419772161	2.96066e-05	11145.4	up	Rnf133	NM_198251	Mus musculus ring finger protein 133 (Rnf133), mRNA [NM_198251]
CUST_1433_PI419772161	0.000268637	11094.2	up	Hsfy2	NM_027661	Mus musculus heat shock transcription factor, Y linked 2 (Hsfy2), mRNA [NM_027661]
CUST_5397_PI419772161	5.89153e-05	11023.4	up	Odf4	NM_145746	Mus musculus outer dense fiber of sperm tails 4 (Odf4), mRNA [NM_145746]
CUST_604_PI419772161	0.000281798	10933.4	up	1700110M21Rik	NM_029680	Mus musculus RIKEN cDNA 1700110M21 gene (1700110M21Rik), mRNA [NM_029680]
CUST_8323_PI419772161	0.000386306	10764.8	up	H2afb1	NM_026627	Mus musculus H2A histone family, member B1 (H2afb1), mRNA [NM_026627]
CUST_5562_PI419772161	0.000277509	10441	up	4933401F05Rik	NM_001081063	hypothetical protein LOC71037
CUST_6644_PI419772161	0.000346635	10385.1	up	Spata3	NM_001122732	testis and spermatogenesis cell apoptosis
CUST_17715_PI419772161	0.00110122	10035.5	up	LOC100040031	NM_001160143	hypothetical protein LOC100040031
CUST_15033_PI419772161	0.000502949	9898.14	up	Pgk2	NM_031190	Mus musculus phosphoglycerate kinase 2 (Pgk2), mRNA [NM_031190]
CUST_8521_PI419772161	0.000880861	9467.46	up	Prm3	NM_013638	protamine 3
CUST_559_PI419772161	0.000311699	9185.97	up	4933409G03Rik	NM_177651	Mus musculus RIKEN cDNA 4933409G03 gene (4933409G03Rik), mRNA [NM_177651]
CUST_12155_PI419772161	0.000166201	9095.33	up	4930511M11Rik	NM_029141	Mus musculus RIKEN cDNA 4930511M11 gene (4930511M11Rik), mRNA [NM_029141]
CUST_17704_PI419772161	0.000661934	8861.15	up	LOC100040911	NM_001160131	hypothetical protein LOC100040911
CUST_12002_PI419772161	0.000974144	8795.28	up	Klk1b8	NM_008457	Mus musculus kallikrein 1-related peptidase b8 (Klk1b8), mRNA [NM_008457]
CUST_17710_PI419772161	0.000172784	8648.75	up	LOC100039614	NM_001160137	Mus musculus hypothetical protein LOC100039614 (LOC100039614), mRNA [NM_001160137]
CUST_13047_PI419772161	0.000307013	8608.65	up	BC048502	NM_177631	Mus musculus cDNA sequence BC048502 (BC048502), mRNA [NM_177631]
CUST_110_PI419772161	0.000448629	8587.7	up	4930578I06Rik	NM_026359	Mus musculus RIKEN cDNA 4930578I06 gene (4930578I06Rik), mRNA [NM_026359]
CUST_4289_PI419772161	0.000200563	8577.79	up	1700094C09Rik	NM_024279	Mus musculus RIKEN cDNA 1700094C09 gene (1700094C09Rik), mRNA [NM_024279]
CUST_3735_PI419772161	0.00121808	8384.96	up	4922502D21Rik	NM_199034	Mus musculus RIKEN cDNA 4922502D21 gene (4922502D21Rik), mRNA [NM_199034]
CUST_9636_PI419772161	0.00308152	8119.61	up	Tssk2	NM_009436	Mus musculus testis-specific serine kinase 2 (Tssk2), mRNA [NM_009436]
CUST_13978_PI419772161	0.000588521	8110.84	up	4921530L21Rik	NM_025733	Mus musculus RIKEN cDNA 4921530L21 gene (4921530L21Rik), mRNA [NM_025733]
CUST_17707_PI419772161	0.000558477	8076.69	up	LOC100039574	NM_001160135	hypothetical protein LOC100039574
CUST_17703_PI419772161	0.000407292	8054.66	up	LOC100040786	NM_001160129	hypothetical protein LOC100040786
CUST_7918_PI419772161	0.000616437	8029.09	up	Pbp2	NM_029595	Mus musculus phosphatidylethanolamine binding protein 2 (Pbp2), mRNA [NM_029595]
CUST_17708_PI419772161	0.000378387	7735.81	up	LOC100042428	NM_001160136	hypothetical protein LOC100042428
CUST_6641_PI419772161	0.000443805	7729.77	up	Spata3	NM_027300	testis and spermatogenesis cell apoptosis
CUST_15666_PI419772161	1.6117e-06	7690.69	up	4931407G18Rik	NM_027631	Mus musculus RIKEN cDNA 4931407G18 gene (4931407G18Rik), mRNA [NM_027631]
CUST_707_PI419772161	0.000440178	7601.59	up	Gm1973	NM_029288	Mus musculus predicted gene 1973 (Gm1973), mRNA [NM_029288]
CUST_5126_PI419772161	0.000283866	7590.04	up	Znrf4	NM_011483	zinc and ring finger 4
CUST_21955_PI419772161	0.00765304	7239.88	up	Galntl5	NM_026449	Mus musculus UDP-N-acetyl-alpha-D-galactosamine:polypeptide N-acetylgalactosaminyltransferase-like 5 (Galntl5), mRNA [NM_026449]
CUST_320_PI419772161	0.000651421	7161.52	up	4922505E12Rik	NM_001033547	Mus musculus RIKEN cDNA 4922505E12 gene (4922505E12Rik), mRNA [NM_001033547]
CUST_3870_PI419772161	0.000101437	7103.3	up	Txndc8	NM_026132	Mus musculus thioredoxin domain containing 8 (Txndc8), mRNA [NM_026132]
CUST_5536_PI419772161	0.000167056	7049.34	up	Tmco2	NM_001081312	Mus musculus transmembrane and coiled-coil domains 2 (Tmco2), mRNA [NM_001081312]
CUST_11403_PI419772161	0.000519281	7002.16	up	Prss39	NM_009355	Mus musculus protease, serine, 39 (Prss39), mRNA [NM_009355]
CUST_13919_PI419772161	0.000176414	6980.96	up	Mbd3l1	NM_028557	Mus musculus methyl-CpG binding domain protein 3-like 1 (Mbd3l1), mRNA [NM_028557]
CUST_19099_PI419772161	0.00129096	6961.51	up	Gm5142	NM_001004158	Mus musculus predicted gene 5142 (Gm5142), mRNA [NM_001004158]
CUST_8485_PI419772161	0.000156191	6792.76	up	Crisp2	NM_009420	Mus musculus cysteine-rich secretory protein 2 (Crisp2), mRNA [NM_009420]
CUST_8245_PI419772161	0.000807108	6660.85	up	Slfnl1	NM_177570	Mus musculus schlafen like 1 (Slfnl1), mRNA [NM_177570]
CUST_3959_PI419772161	0.00564852	6539.23	up	Hyal5	NM_028957	Mus musculus hyaluronoglucosaminidase 5 (Hyal5), mRNA [NM_028957]
CUST_2333_PI419772161	0.000423325	6425.43	up	Spaca3	NM_029367	Mus musculus sperm acrosome associated 3 (Spaca3), mRNA [NM_029367]
CUST_1355_PI419772161	0.0010091	6412.46	up	1700016D06Rik	NM_024271	Mus musculus RIKEN cDNA 1700016D06 gene (1700016D06Rik), mRNA [NM_024271]
CUST_20779_PI419772161	7.75741e-05	5959.53	up	Adam2	NM_009618	Mus musculus a disintegrin and metallopeptidase domain 2 (Adam2), mRNA [NM_009618]
CUST_13337_PI419772161	0.00123996	5845.57	up	1700090G07Rik	NM_030104	Mus musculus RIKEN cDNA 1700090G07 gene (1700090G07Rik), mRNA [NM_030104]
CUST_6640_PI419772161	0.0016028	5387.39	up	Spata3	NM_027029	Mus musculus spermatogenesis associated 3 (Spata3), transcript variant 1, mRNA [NM_027029]
CUST_6163_PI419772161	0.000185667	5337.37	up	Prss52	NM_028525	Mus musculus protease, serine, 52 (Prss52), mRNA [NM_028525]
CUST_4719_PI419772161	0.00038823	5298.3	up	Spatc1	NM_028852	Mus musculus spermatogenesis and centriole associated 1 (Spatc1), mRNA [NM_028852]
CUST_19699_PI419772161	0.0051189	5293.34	up	Adora3	NM_027025	Mus musculus adenosine A3 receptor (Adora3), transcript variant 2, mRNA [NM_027025]
CUST_13169_PI419772161	0.000627745	5273.08	up	Fam170a	NM_001004061	Mus musculus family with sequence similarity 170, member A (Fam170a), mRNA [NM_001004061]
CUST_10221_PI419772161	0.00500126	5266.63	up	Tppp2	NM_001128634	Mus musculus tubulin polymerization-promoting protein family member 2 (Tppp2), mRNA [NM_001128634]
CUST_1007_PI419772161	0.000907979	5173.7	up	Catsperb	NM_173023	Mus musculus cation channel, sperm-associated, beta (Catsperb), mRNA [NM_173023]
CUST_16286_PI419772161	0.000174644	5072.85	up	Gstt4	NM_029472	Mus musculus glutathione S-transferase, theta 4 (Gstt4), mRNA [NM_029472]
CUST_13_PI419772161	0.000510634	5052.66	up	Cdrt4	NM_025496	Mus musculus CMT1A duplicated region transcript 4 (Cdrt4), mRNA [NM_025496]
CUST_1370_PI419772161	5.62937e-05	4937.87	up	Spata16	NM_029150	Mus musculus spermatogenesis associated 16 (Spata16), transcript variant 2, mRNA [NM_029150]
CUST_18262_PI419772161	0.00109994	4779.14	up	Apobec4	NM_001081197	Mus musculus apolipoprotein B mRNA editing enzyme, catalytic polypeptide-like 4 (putative) (Apobec4), mRNA [NM_001081197]
CUST_19249_PI419772161	0.000213199	4775.03	up	Gm10375	NM_001098269	hypothetical protein LOC100042342
CUST_5881_PI419772161	2.25319e-05	4725.68	up	Actl7b	NM_025271	Mus musculus actin-like 7b (Actl7b), mRNA [NM_025271]
CUST_17471_PI419772161	0.000603217	4720.65	up	Prm1	NM_013637	Mus musculus protamine 1 (Prm1), mRNA [NM_013637]
CUST_12451_PI419772161	0.000626479	4670.68	up	Ccdc38	NM_175488	Mus musculus coiled-coil domain containing 38 (Ccdc38), mRNA [NM_175488]
CUST_12505_PI419772161	0.000634875	4612.28	up	Lyzl1	NM_026092	Mus musculus lysozyme-like 1 (Lyzl1), mRNA [NM_026092]
CUST_900_PI419772161	0.000171554	4578.25	up	1700019N19Rik	NM_026208	Mus musculus RIKEN cDNA 1700019N19 gene (1700019N19Rik), mRNA [NM_026208]
CUST_5612_PI419772161	0.00844517	4551.46	up	Ddi1	NM_027942	Mus musculus DDI1, DNA-damage inducible 1, homolog 1 (S. cerevisiae) (Ddi1), mRNA [NM_027942]
CUST_13032_PI419772161	0.000528355	4449.28	up	Cstl1	NM_177655	Mus musculus cystatin-like 1 (Cstl1), transcript variant 3, mRNA [NM_177655]
CUST_9753_PI419772161	0.000903513	4437.22	up	4930505A04Rik	NM_001100394	Mus musculus RIKEN cDNA 4930505A04 gene (4930505A04Rik), mRNA [NM_001100394]
CUST_7385_PI419772161	0.00140045	4405.72	up	Spata20	NM_144827	Mus musculus spermatogenesis associated 20 (Spata20), mRNA [NM_144827]
CUST_3022_PI419772161	0.000458093	4391.07	up	Akap4	NM_009651	A-kinase anchor protein 4 isoform a
CUST_2054_PI419772161	0.000564761	4258.2	up	Ubl4b	NM_026261	Mus musculus ubiquitin-like 4B (Ubl4b), mRNA [NM_026261]
CUST_10965_PI419772161	0.00117161	4246.43	up	Fam71b	NM_001013783	Mus musculus family with sequence similarity 71, member B (Fam71b), mRNA [NM_001013783]
CUST_20811_PI419772161	0.000310534	4224.07	up	Adam6a	NM_174885	Mus musculus a disintegrin and metallopeptidase domain 6A (Adam6a), mRNA [NM_174885]
CUST_1_PI419772161	0.000352524	3975.2	up	Tcp10a	NM_009340	t-complex protein 10a
CUST_13056_PI419772161	0.00165251	3953.16	up	Hrasls5	NM_025731	Mus musculus HRAS-like suppressor family, member 5 (Hrasls5), mRNA [NM_025731]
CUST_533_PI419772161	0.00209348	3885.14	up	4930522H14Rik	NM_026291	Mus musculus RIKEN cDNA 4930522H14 gene (4930522H14Rik), mRNA [NM_026291]
CUST_21614_PI419772161	0.002351	3867.66	up	Adam18	NM_010084	Mus musculus a disintegrin and metallopeptidase domain 18 (Adam18), mRNA [NM_010084]
CUST_221_PI419772161	0.00177525	3864.49	up	Morn3	NM_029112	Mus musculus MORN repeat containing 3 (Morn3), mRNA [NM_029112]
CUST_22127_PI419772161	0.000320778	3826.17	up	Oxct2a	NM_022033	Mus musculus 3-oxoacid CoA transferase 2A (Oxct2a), mRNA [NM_022033]
CUST_10509_PI419772161	0.000764586	3786.8	up	Fam71a	NM_001109759	hypothetical protein LOC619288
CUST_6484_PI419772161	0.00123721	3770.43	up	Zbbx	NM_172515	Mus musculus zinc finger, B-box domain containing (Zbbx), mRNA [NM_172515]
CUST_7467_PI419772161	0.000892004	3740.45	up	Spata4	NM_133711	Mus musculus spermatogenesis associated 4 (Spata4), mRNA [NM_133711]
CUST_546_PI419772161	0.000702182	3691.12	up	4933415F23Rik	NM_025746	Mus musculus RIKEN cDNA 4933415F23 gene (4933415F23Rik), mRNA [NM_025746]
CUST_20265_PI419772161	8.91784e-06	3683.94	up	Gsg1	NM_001080552	germ cell-specific gene 1 isoform a
CUST_5379_PI419772161	0.000696351	3657.91	up	Sel1l2	NM_001033296	Mus musculus sel-1 suppressor of lin-12-like 2 (C. elegans) (Sel1l2), mRNA [NM_001033296]
CUST_17609_PI419772161	1.08569e-05	3560.58	up	Pgam2	NM_018870	Mus musculus phosphoglycerate mutase 2 (Pgam2), mRNA [NM_018870]
CUST_13339_PI419772161	0.000209254	3540.27	up	Iqcf5	NM_029300	Mus musculus IQ motif containing F5 (Iqcf5), mRNA [NM_029300]
CUST_19238_PI419772161	0.00118544	3518.35	up	Gm14346	NM_001085551	hypothetical protein LOC668958
CUST_19055_PI419772161	0.00482778	3513.38	up	Gm5591	NM_001013810	Mus musculus predicted gene 5591 (Gm5591), mRNA [NM_001013810]
CUST_21453_PI419772161	0.00190023	3485.12	up	Capza3	NM_007605	Mus musculus capping protein (actin filament) muscle Z-line, alpha 3 (Capza3), mRNA [NM_007605]
CUST_10354_PI419772161	0.000308662	3469.33	up	Pfn3	NM_029303	Mus musculus profilin 3 (Pfn3), mRNA [NM_029303]
CUST_27_PI419772161	0.00145164	3457.19	up	1700018L24Rik	NM_029326	Mus musculus RIKEN cDNA 1700018L24 gene (1700018L24Rik), mRNA [NM_029326]
CUST_10695_PI419772161	0.000843471	3396.43	up	Fam71f1	NM_207258	Mus musculus family with sequence similarity 71, member F1 (Fam71f1), mRNA [NM_207258]
CUST_728_PI419772161	0.000196058	3266.29	up	Ccdc70	NM_026459	Mus musculus coiled-coil domain containing 70 (Ccdc70), mRNA [NM_026459]
CUST_18732_PI419772161	0.00554919	3218.92	up	Gm136	NM_001033255	Mus musculus predicted gene 136 (Gm136), mRNA [NM_001033255]
CUST_88_PI419772161	0.000188205	3170.23	up	BC048562	NM_001004192	Mus musculus cDNA sequence BC048562 (BC048562), mRNA [NM_001004192]
CUST_5_PI419532418	2.83327e-05	3161.08	up	Ldhal6b	NM_175349	lactate dehydrogenase A-like 6B
CUST_18431_PI419772161	0.000218926	3154.19	up	Trim17	NM_031172	Mus musculus tripartite motif-containing 17 (Trim17), mRNA [NM_031172]
CUST_5564_PI419772161	0.000354037	3146.74	up	Daf2	NM_007827	Mus musculus decay accelerating factor 2 (Daf2), mRNA [NM_007827]
CUST_5308_PI419772161	0.000256745	3135.19	up	Actl7a	NM_009611	Mus musculus actin-like 7a (Actl7a), mRNA [NM_009611]
CUST_18836_PI419772161	0.00176315	3132.7	up	Gm614	NM_001033362	hypothetical protein LOC245536
CUST_584_PI419772161	0.000193795	3113.76	up	Tcp10b	NM_011553	t-complex protein 10b
CUST_487_PI419772161	0.000689458	3106.99	up	Ccdc27	NM_001033455	Mus musculus coiled-coil domain containing 27 (Ccdc27), mRNA [NM_001033455]
CUST_3446_PI419772161	5.75104e-06	3088.17	up	Oxct2b	NM_181859	3-oxoacid CoA transferase 2B precursor
CUST_9630_PI419772161	0.00019224	3080.82	up	Ldhal6b	NM_175349	Mus musculus lactate dehydrogenase A-like 6B (Ldhal6b), mRNA [NM_175349]
CUST_18818_PI419772161	0.00785641	3039.23	up	Cct8l1	NM_198621	Mus musculus chaperonin containing TCP1, subunit 8 (theta)-like 1 (Cct8l1), mRNA [NM_198621]
CUST_952_PI419772161	0.000598865	3018.11	up	Cpxcr1	NM_001033471	hypothetical protein LOC382239
CUST_18744_PI419772161	0.000127003	3016.74	up	Gm2933	NM_001145038	predicted gene 2933
CUST_252_PI419772161	3.76124e-05	2967.67	up	BC048671	NM_177738	Mus musculus cDNA sequence BC048671 (BC048671), mRNA [NM_177738]
CUST_8447_PI419772161	0.000458231	2956	up	Eid3	NM_025499	Mus musculus EP300 interacting inhibitor of differentiation 3 (Eid3), mRNA [NM_025499]
CUST_20270_PI419772161	0.000102527	2916.02	up	Gsg1	NM_010352	Mus musculus germ cell-specific gene 1 (Gsg1), transcript variant 3, mRNA [NM_010352]
CUST_16739_PI419772161	0.00294292	2844.83	up	Tex24	NM_001013609	testis expressed gene 24
CUST_10168_PI419772161	0.000881059	2786.28	up	Tgif2lx2	NM_001142750	TGFB-induced factor homeobox 2-like, X-linked 2
CUST_3481_PI419772161	0.00214485	2700.09	up	Gmcl1l	NM_027955	Mus musculus germ cell-less homolog 1 (Drosophila)-like (Gmcl1l), mRNA [NM_027955]
CUST_21932_PI419772161	0.000457688	2688.57	up	Fam71d	NM_027597	Mus musculus family with sequence similarity 71, member D (Fam71d), transcript variant 2, mRNA [NM_027597]
CUST_18713_PI419772161	0.00257337	2679.42	up	Gm7073	NM_001039240	hypothetical protein LOC631784
CUST_20267_PI419772161	1.62188e-05	2627.35	up	Gsg1	NM_001080553	germ cell-specific gene 1 isoform b
CUST_7747_PI419772161	0.000360434	2610.66	up	D7Ertd443e	NM_001081331	Mus musculus DNA segment, Chr 7, ERATO Doi 443, expressed (D7Ertd443e), mRNA [NM_001081331]
CUST_4460_PI419772161	0.00162846	2564.74	up	1700001F09Rik	NM_027940	Mus musculus RIKEN cDNA 1700001F09 gene (1700001F09Rik), mRNA [NM_027940]
CUST_4213_PI419772161	0.000304596	2491.41	up	Trim69	NM_080510	Mus musculus tripartite motif-containing 69 (Trim69), mRNA [NM_080510]
CUST_21983_PI419772161	0.000430488	2466.44	up	4930432K09Rik	NM_028648	Mus musculus RIKEN cDNA 4930432K09 gene (4930432K09Rik), transcript variant 2, mRNA [NM_028648]
CUST_18750_PI419772161	8.15519e-05	2457.9	up	Gm2863	NM_001099333	hypothetical protein LOC100040606
CUST_18110_PI419772161	0.000549308	2432.71	up	4931408C20Rik	NM_001033764	hypothetical protein LOC210940
CUST_2896_PI419772161	0.000321259	2431.7	up	Ubqln3	NM_198623	Mus musculus ubiquilin 3 (Ubqln3), mRNA [NM_198623]
CUST_9587_PI419772161	0.000343317	2427.79	up	Lyzl6	NM_027083	Mus musculus lysozyme-like 6 (Lyzl6), mRNA [NM_027083]
CUST_1536_PI419772161	0.00203168	2411.08	up	Trim42	NM_030219	Mus musculus tripartite motif-containing 42 (Trim42), mRNA [NM_030219]
CUST_19096_PI419772161	0.000240305	2402.23	up	Gm14484	NM_001025260	hypothetical protein LOC547160
CUST_8195_PI419772161	0.000908228	2360.78	up	Speer3	NM_027650	Mus musculus spermatogenesis associated glutamate (E)-rich protein 3 (Speer3), mRNA [NM_027650]
CUST_14560_PI419772161	0.00210159	2339.09	up	Fam122c	NM_028671	Mus musculus family with sequence similarity 122, member C (Fam122c), mRNA [NM_028671]
CUST_1508_PI419772161	0.00181418	2338.31	up	Lrrc8b	NM_001033550	Mus musculus leucine rich repeat containing 8 family, member B (Lrrc8b), mRNA [NM_001033550]
CUST_22142_PI419772161	0.000870134	2328.7	up	Gtf2a1l	NM_023630	Mus musculus general transcription factor IIA, 1-like (Gtf2a1l), mRNA [NM_023630]
CUST_20681_PI419772161	3.32167e-05	2327.85	up	Dusp13	NM_001007268	Mus musculus dual specificity phosphatase 13 (Dusp13), transcript variant 1, mRNA [NM_001007268]
CUST_11726_PI419772161	0.000821087	2239.66	up	Pdcl2	NM_023508	Mus musculus phosducin-like 2 (Pdcl2), mRNA [NM_023508]
CUST_18059_PI419772161	0.000918312	2239.44	up	Amy2a5	NM_001042711	Mus musculus amylase 2a5 (Amy2a5), mRNA [NM_001042711]
CUST_765_PI419772161	0.000920387	2234.3	up	4930547C10Rik	NM_026652	Mus musculus RIKEN cDNA 4930547C10 gene (4930547C10Rik), mRNA [NM_026652]
CUST_9339_PI419772161	1.32902e-05	2206	up	Usp50	NM_029163	Mus musculus ubiquitin specific peptidase 50 (Usp50), mRNA [NM_029163]
CUST_2971_PI419772161	0.00652003	2201.77	up	Adam24	NM_010086	Mus musculus a disintegrin and metallopeptidase domain 24 (testase 1) (Adam24), mRNA [NM_010086]
CUST_3382_PI419772161	0.000359458	2171.4	up	4933405O20Rik	NM_172901	Mus musculus RIKEN cDNA 4933405O20 gene (4933405O20Rik), mRNA [NM_172901]
CUST_19241_PI419772161	1.97405e-05	2169.86	up	Gm10921	NM_001085553	hypothetical protein LOC668963
CUST_14563_PI419772161	0.000524768	2136.38	up	Catsper4	NM_177866	Mus musculus cation channel, sperm associated 4 (Catsper4), transcript variant 1, mRNA [NM_177866]
CUST_20680_PI419772161	8.7049e-05	2082.67	up	Dusp13	NM_013849	dual specificity phosphatase 13 isoform 2
CUST_19200_PI419772161	0.0012233	2040.64	up	Gm14374	NM_001085523	hypothetical protein LOC434725
CUST_12787_PI419772161	0.000639892	2037.71	up	4932412H11Rik	NM_172879	Mus musculus RIKEN cDNA 4932412H11 gene (4932412H11Rik), mRNA [NM_172879]
CUST_4176_PI419772161	0.000219013	2025.39	up	Fhl5	NM_021318	Mus musculus four and a half LIM domains 5 (Fhl5), mRNA [NM_021318]
CUST_534_PI419772161	9.42495e-05	2025.27	up	1700001P01Rik	NM_028156	Mus musculus RIKEN cDNA 1700001P01 gene (1700001P01Rik), mRNA [NM_028156]
CUST_16887_PI419772161	0.00630272	2002.89	up	Zp3r	NM_009581	Mus musculus zona pellucida 3 receptor (Zp3r), mRNA [NM_009581]
CUST_19242_PI419772161	0.00437485	1982.79	up	Gm10922	NM_001085554	hypothetical protein LOC668964
CUST_7867_PI419772161	0.000313283	1980.65	up	Pebp4	NM_028560	Mus musculus phosphatidylethanolamine binding protein 4 (Pebp4), transcript variant 1, mRNA [NM_028560]
CUST_7545_PI419772161	0.00117539	1968.54	up	Cypt9	NM_001039942	Mus musculus cysteine-rich perinuclear theca 9 (Cypt9), mRNA [NM_001039942]
CUST_18250_PI419772161	0.000416932	1949.8	up	Fbp1	NM_019395	Mus musculus fructose bisphosphatase 1 (Fbp1), mRNA [NM_019395]
CUST_1017_PI419772161	0.000511679	1932.11	up	OTTMUSG00000016789	NM_001111037	novel protein similar to histone H2a
CUST_20210_PI419772161	0.000170218	1917.2	up	Ddc8	NM_021440	Mus musculus differential display clone 8 (Ddc8), mRNA [NM_021440]
CUST_10348_PI419772161	1.24433e-05	1903.66	up	Prss21	NM_020487	Mus musculus protease, serine, 21 (Prss21), mRNA [NM_020487]
CUST_5892_PI419772161	0.000463673	1903.31	up	1700054O13Rik	NM_026096	Mus musculus RIKEN cDNA 1700054O13 gene (1700054O13Rik), mRNA [NM_026096]
CUST_13776_PI419772161	0.000328866	1894.68	up	Cetn1	NM_007593	Mus musculus centrin 1 (Cetn1), mRNA [NM_007593]
CUST_19225_PI419772161	0.00192169	1864.77	up	Gm14347	NM_001085543	hypothetical protein LOC627264
CUST_2347_PI419772161	0.00112972	1863.49	up	Lrrc52	NM_001013382	Mus musculus leucine rich repeat containing 52 (Lrrc52), mRNA [NM_001013382]
CUST_12588_PI419772161	0.0029979	1861.81	up	4932414N04Rik	NM_183113	Mus musculus RIKEN cDNA 4932414N04 gene (4932414N04Rik), mRNA [NM_183113]
CUST_21976_PI419772161	0.000533112	1855.22	up	Dnajc5b	NM_025489	Mus musculus DnaJ (Hsp40) homolog, subfamily C, member 5 beta (Dnajc5b), transcript variant 2, mRNA [NM_025489]
CUST_19240_PI419772161	0.0013645	1851	up	Gm14351	NM_001085552	hypothetical protein LOC668960
CUST_264_PI419772161	0.000607725	1837.24	up	1700017N19Rik	NM_001081246	Mus musculus RIKEN cDNA 1700017N19 gene (1700017N19Rik), mRNA [NM_001081246]
CUST_1626_PI419772161	0.000607797	1831.88	up	Ankrd7	NM_029202	Mus musculus ankyrin repeat domain 7 (Ankrd7), transcript variant 2, mRNA [NM_029202]
CUST_19928_PI419772161	2.69997e-05	1821.29	up	Tdrd6	NM_001161367	tudor domain containing 6 isoform 3
CUST_14545_PI419772161	0.000298059	1814.32	up	Qrich2	NM_001033267	Mus musculus glutamine rich 2 (Qrich2), mRNA [NM_001033267]
CUST_12156_PI419772161	0.00021059	1799.03	up	Ms4a13	NM_198224	Mus musculus membrane-spanning 4-domains, subfamily A, member 13 (Ms4a13), mRNA [NM_198224]
CUST_15920_PI419772161	0.000591378	1779.13	up	Tex21	NM_019784	Mus musculus testis expressed gene 21 (Tex21), transcript variant 1, mRNA [NM_019784]
CUST_8445_PI419772161	0.00053499	1718.6	up	Odf1	NM_008757	Mus musculus outer dense fiber of sperm tails 1 (Odf1), mRNA [NM_008757]
CUST_19086_PI419772161	7.66281e-05	1715.87	up	Gm14501	NM_001085537	novel protein similar to histone H2a
CUST_19205_PI419772161	0.0027534	1710.66	up	Gm14725	NM_001081476	predicted gene 14725
CUST_18886_PI419772161	0.000699965	1707.89	up	Actl9	NM_183282	Mus musculus actin-like 9 (Actl9), mRNA [NM_183282]
CUST_6897_PI419772161	0.0038923	1693.24	up	Akap3	NM_009650	Mus musculus A kinase (PRKA) anchor protein 3 (Akap3), mRNA [NM_009650]
CUST_32_PI419772161	3.27185e-05	1692.79	up	4930404H21Rik	NM_028654	Mus musculus RIKEN cDNA 4930404H21 gene (4930404H21Rik), mRNA [NM_028654]
CUST_15922_PI419772161	0.00044036	1669.29	up	Tex21	NM_001159532	testis expressed gene 21 isoform 2
CUST_4400_PI419772161	0.00560789	1618	up	Ccdc110	NM_001033246	Mus musculus coiled-coil domain containing 110 (Ccdc110), mRNA [NM_001033246]
CUST_19230_PI419772161	0.00473598	1611.87	up	Gm14345	NM_001085545	hypothetical protein LOC630022
CUST_9836_PI419772161	0.00129539	1608.47	up	Odf3	NM_027019	shippo 1
CUST_2675_PI419772161	0.00214318	1600.95	up	4931417E11Rik	NM_025737	Mus musculus RIKEN cDNA 4931417E11 gene (4931417E11Rik), mRNA [NM_025737]
CUST_10359_PI419772161	0.00880021	1599.44	up	Spam1	NM_001079875	Mus musculus sperm adhesion molecule 1 (Spam1), transcript variant 1, mRNA [NM_001079875]
CUST_904_PI419772161	0.000136093	1580.03	up	Nsun7	NM_027602	NOL1/NOP2/Sun domain family, member 7
CUST_19926_PI419772161	0.000658826	1566.69	up	Tdrd6	NM_001161366	tudor domain containing 6 isoform 1
CUST_7538_PI419772161	0.001107	1558.28	up	Cypt10	NM_001039944	cysteine-rich perinuclear theca 10
CUST_16803_PI419772161	9.20266e-05	1556.8	up	Adam32	NM_153397	Mus musculus a disintegrin and metallopeptidase domain 32 (Adam32), mRNA [NM_153397]
CUST_17976_PI419772161	0.0023709	1547.45	up	Tekt3	NM_027660	tektin 3
CUST_9627_PI419772161	0.000144661	1546.92	up	Tssk1	NM_009435	Mus musculus testis-specific serine kinase 1 (Tssk1), mRNA [NM_009435]
CUST_7201_PI419772161	0.000849011	1539.45	up	1700028P14Rik	NM_026188	Mus musculus RIKEN cDNA 1700028P14 gene (1700028P14Rik), mRNA [NM_026188]
CUST_19924_PI419772161	0.000499687	1536.89	up	Tdrd6	NM_198418	Mus musculus tudor domain containing 6 (Tdrd6), transcript variant 2, mRNA [NM_198418]
CUST_22178_PI419772161	0.000135517	1533.21	up	Pmfbp1	NM_019938	Mus musculus polyamine modulated factor 1 binding protein 1 (Pmfbp1), mRNA [NM_019938]
CUST_593_PI419772161	0.000217027	1490.9	up	Tbc1d21	NM_028854	TBC1 domain family, member 21
CUST_2151_PI419772161	0.00168492	1478.48	up	Adam25	NM_011781	Mus musculus a disintegrin and metallopeptidase domain 25 (testase 2) (Adam25), mRNA [NM_011781]
CUST_3989_PI419772161	0.00263184	1474.07	up	Spata16	NM_027583	Nyd-sp12 protein isoform 1
CUST_8438_PI419772161	0.000908255	1468.4	up	4930443G12Rik	NM_029054	Mus musculus RIKEN cDNA 4930443G12 gene (4930443G12Rik), mRNA [NM_029054]
CUST_11251_PI419772161	0.0011926	1459.08	up	1700025F22Rik	NM_027074	Mus musculus RIKEN cDNA 1700025F22 gene (1700025F22Rik), mRNA [NM_027074]
CUST_4448_PI419772161	0.00467454	1457.15	up	Tgif2lx1	NM_153109	Mus musculus TGFB-induced factor homeobox 2-like, X-linked 1 (Tgif2lx1), mRNA [NM_153109]
CUST_14565_PI419772161	0.00086763	1431.67	up	Catsper4	NM_001130030	channel, sperm associated 4 isoform 2
CUST_19211_PI419772161	0.000796641	1411.88	up	Gm5458	NM_001024706	Mus musculus predicted gene 5458 (Gm5458), mRNA [NM_001024706]
CUST_4466_PI419772161	0.00178257	1393.36	up	Abca15	NM_177213	Mus musculus ATP-binding cassette, sub-family A (ABC1), member 15 (Abca15), mRNA [NM_177213]
CUST_317_PI419772161	0.000583014	1389.9	up	4932411G14Rik	NM_177711	Mus musculus RIKEN cDNA 4932411G14 gene (4932411G14Rik), mRNA [NM_177711]
CUST_19266_PI419772161	0.000131705	1385.5	up	Gm4787	NM_001038995	a disintegrin and metalloprotease domain 4b
CUST_6394_PI419772161	0.00197081	1382.73	up	Tmco5b	NM_029232	Mus musculus transmembrane and coiled-coil domains 5B (Tmco5b), mRNA [NM_029232]
CUST_7683_PI419772161	2.8433e-05	1379.92	up	Acrv1	NM_007391	Mus musculus acrosomal vesicle protein 1 (Acrv1), mRNA [NM_007391]
CUST_2411_PI419772161	6.28562e-05	1377.87	up	Tex22	NM_029381	Mus musculus testis expressed gene 22 (Tex22), mRNA [NM_029381]
CUST_19237_PI419772161	1.04303e-05	1376.64	up	Gm4937	NM_001013760	Mus musculus predicted gene 4937 (Gm4937), mRNA [NM_001013760]
CUST_17016_PI419772161	7.18805e-05	1372.05	up	4930503B20Rik	NM_029144	Mus musculus RIKEN cDNA 4930503B20 gene (4930503B20Rik), mRNA [NM_029144]
CUST_10584_PI419772161	0.000146042	1366.11	up	Fam71f2	NM_001101486	hypothetical protein LOC245884
CUST_7195_PI419772161	0.00751413	1358.28	up	4833427G06Rik	NM_177702	Mus musculus RIKEN cDNA 4833427G06 gene (4833427G06Rik), mRNA [NM_177702]
CUST_5716_PI419772161	0.00169557	1348.01	up	4930449I24Rik	NM_026136	Mus musculus RIKEN cDNA 4930449I24 gene (4930449I24Rik), mRNA [NM_026136]
CUST_5099_PI419772161	0.000856609	1341.52	up	Kif2b	NM_028547	Mus musculus kinesin family member 2B (Kif2b), mRNA [NM_028547]
CUST_2349_PI419772161	0.00134014	1330.37	up	Tcte1	NM_013688	Mus musculus t-complex-associated testis expressed 1 (Tcte1), mRNA [NM_013688]
CUST_19148_PI419772161	8.1678e-05	1315.39	up	Gm5941	NM_001034103	hypothetical protein LOC546347
CUST_18189_PI419772161	0.000899353	1299.89	up	Tssk3	NM_080442	Mus musculus testis-specific serine kinase 3 (Tssk3), mRNA [NM_080442]
CUST_14561_PI419772161	0.000548233	1293.96	up	March11	NM_177597	Mus musculus membrane-associated ring finger (C3HC4) 11 (March11), mRNA [NM_177597]
CUST_13979_PI419772161	0.00525033	1282.26	up	4930544D05Rik	NM_001145537	hypothetical protein LOC668433
CUST_16218_PI419772161	5.62627e-05	1276.12	up	Atp6ap1l	NM_001145879	predicted gene, EG435376
CUST_8188_PI419772161	0.00015938	1247.78	up	Fbxw10	NM_001033669	F-box and WD-40 domain protein 10
CUST_7157_PI419772161	0.00284605	1244.93	up	Zfp474	NM_025749	Mus musculus zinc finger protein 474 (Zfp474), mRNA [NM_025749]
CUST_1243_PI419772161	0.000132679	1230.92	up	Arrdc5	NM_029799	Mus musculus arrestin domain containing 5 (Arrdc5), mRNA [NM_029799]
CUST_1087_PI419772161	1.72285e-05	1218.32	up	1700027D21Rik	NM_029661	Mus musculus RIKEN cDNA 1700027D21 gene (1700027D21Rik), mRNA [NM_029661]
CUST_8306_PI419772161	0.00159849	1199.64	up	Fbxo39	NM_001099688	Mus musculus F-box protein 39 (Fbxo39), mRNA [NM_001099688]
CUST_14678_PI419772161	0.000183875	1195.5	up	Tsks	NM_001077591	Mus musculus testis-specific serine kinase substrate (Tsks), transcript variant 2, mRNA [NM_001077591]
CUST_6198_PI419772161	0.00114908	1185.15	up	4930524E20Rik	NM_001081661	Mus musculus RIKEN cDNA 4930524E20 gene (4930524E20Rik), mRNA [NM_001081661]
CUST_2205_PI419772161	0.000205338	1182.76	up	Fabp9	NM_011598	Mus musculus fatty acid binding protein 9, testis (Fabp9), mRNA [NM_011598]
CUST_903_PI419772161	0.00298065	1177.98	up	1700057K13Rik	NM_028540	Mus musculus RIKEN cDNA 1700057K13 gene (1700057K13Rik), mRNA [NM_028540]
CUST_9113_PI419772161	0.00110863	1169.92	up	Klk1b9	NM_010116	Mus musculus kallikrein 1-related peptidase b9 (Klk1b9), mRNA [NM_010116]
CUST_4_PI419772161	0.000232391	1158.48	up	1810065E05Rik	NM_027239	Mus musculus RIKEN cDNA 1810065E05 gene (1810065E05Rik), mRNA [NM_027239]
CUST_5718_PI419772161	0.000998865	1140.87	up	Zdhhc11	NM_027704	Mus musculus zinc finger, DHHC domain containing 11 (Zdhhc11), mRNA [NM_027704]
CUST_11315_PI419772161	0.000234138	1108.78	up	Spag16	NM_025728	Mus musculus sperm associated antigen 16 (Spag16), transcript variant 2, mRNA [NM_025728]
CUST_8267_PI419772161	0.0023721	1102.64	up	Ankrd53	NM_029245	Mus musculus ankyrin repeat domain 53 (Ankrd53), mRNA [NM_029245]
CUST_14830_PI419772161	0.00220602	1091.11	up	Apoh	NM_013475	Mus musculus apolipoprotein H (Apoh), mRNA [NM_013475]
CUST_13853_PI419772161	0.000171078	1079.31	up	1700017D01Rik	NM_027058	Mus musculus RIKEN cDNA 1700017D01 gene (1700017D01Rik), mRNA [NM_027058]
CUST_5454_PI419772161	0.00907927	1068.8	up	Ssty1	NM_009220	Mus musculus spermiogenesis specific transcript on the Y 1 (Ssty1), mRNA [NM_009220]
CUST_9279_PI419772161	0.00013973	1058.42	up	Tssk6	NM_032004	Mus musculus testis-specific serine kinase 6 (Tssk6), mRNA [NM_032004]
CUST_4887_PI419772161	5.03785e-05	1050.79	up	Slc22a14	NM_001037749	Mus musculus solute carrier family 22 (organic cation transporter), member 14 (Slc22a14), mRNA [NM_001037749]
CUST_7150_PI419772161	0.00883559	1035.42	up	1700012B09Rik	NM_029306	Mus musculus RIKEN cDNA 1700012B09 gene (1700012B09Rik), mRNA [NM_029306]
CUST_6325_PI419772161	0.000428597	1024.77	up	Olfr112	NM_001013575	Mus musculus olfactory receptor 112 (Olfr112), mRNA [NM_001013575]
CUST_817_PI419772161	0.00300541	1024.63	up	LOC100040223	NM_001103152	similar to spermiogenesis specific transcript on
CUST_20735_PI419772161	7.57911e-05	1012.31	up	1700030F18Rik	NM_028180	Mus musculus RIKEN cDNA 1700030F18 gene (1700030F18Rik), transcript variant 2, mRNA [NM_028180]
CUST_8439_PI419772161	0.000637482	994.445	up	1700013F07Rik	NM_029314	hypothetical protein LOC75504
CUST_1374_PI419772161	0.000895233	989.649	up	Theg	NM_011583	Mus musculus testicular haploid expressed gene (Theg), transcript variant 1, mRNA [NM_011583]
CUST_2335_PI419772161	0.000294626	981.906	up	Dnajb7	NM_021317	Mus musculus DnaJ (Hsp40) homolog, subfamily B, member 7 (Dnajb7), mRNA [NM_021317]
CUST_4255_PI419772161	0.000167611	976.875	up	Tcp10c	NM_009341	Mus musculus t-complex protein 10c (Tcp10c), mRNA [NM_009341]
CUST_4713_PI419772161	0.00100132	968.569	up	4930428D18Rik	NM_001033799	hypothetical protein LOC619294
CUST_19735_PI419772161	1.26127e-06	957.014	up	Stat4	NM_011487	Mus musculus signal transducer and activator of transcription 4 (Stat4), mRNA [NM_011487]
CUST_7176_PI419772161	0.00285574	951.934	up	1110017D15Rik	NM_001048005	Mus musculus RIKEN cDNA 1110017D15 gene (1110017D15Rik), transcript variant 1, mRNA [NM_001048005]
CUST_741_PI419772161	0.00616984	949.2	up	1700010D01Rik	NM_029590	Mus musculus RIKEN cDNA 1700010D01 gene (1700010D01Rik), mRNA [NM_029590]
CUST_8401_PI419772161	0.000422571	948.315	up	CK137956	NM_001134733	Mus musculus cDNA sequence CK137956 (CK137956), mRNA [NM_001134733]
CUST_18948_PI419772161	0.00209169	948.037	up	Gm5132	NM_001085517	Mus musculus predicted gene 5132 (Gm5132), mRNA [NM_001085517]
CUST_13334_PI419772161	0.00133513	947.361	up	4930562C15Rik	NM_030192	Mus musculus RIKEN cDNA 4930562C15 gene (4930562C15Rik), mRNA [NM_030192]
CUST_14677_PI419772161	0.000795139	919.782	up	Tsks	NM_011651	serine/threonine kinase 22 substrate 1 isoform
CUST_693_PI419772161	0.000352582	902.921	up	Spata19	NM_029299	Mus musculus spermatogenesis associated 19 (Spata19), mRNA [NM_029299]
CUST_1663_PI419772161	0.00259769	899.862	up	1700123K08Rik	NM_029693	Mus musculus RIKEN cDNA 1700123K08 gene (1700123K08Rik), mRNA [NM_029693]
CUST_7593_PI419772161	0.000288296	893.013	up	Lrrc67	NM_145692	Mus musculus leucine rich repeat containing 67 (Lrrc67), transcript variant 2, mRNA [NM_145692]
CUST_7175_PI419772161	0.000902843	881.75	up	1110017D15Rik	NM_028624	testes development-related NYD-SP22 isoform 2
CUST_19016_PI419772161	1.69066e-05	876.337	up	Gm5878	NM_001034902	hypothetical protein LOC545861
CUST_17780_PI419772161	0.00027497	868.581	up	Klk1b27	NM_020268	Mus musculus kallikrein 1-related peptidase b27 (Klk1b27), mRNA [NM_020268]
CUST_7921_PI419772161	0.00126643	848.227	up	AF366264	NM_153093	Mus musculus cDNA sequence AF366264 (AF366264), mRNA [NM_153093]
CUST_4705_PI419772161	0.000616104	844.563	up	Cldnd2	NM_028849	Mus musculus claudin domain containing 2 (Cldnd2), mRNA [NM_028849]
CUST_2664_PI419772161	0.000370695	822.217	up	Tcp11	NM_013687	Mus musculus t-complex protein 11 (Tcp11), transcript variant 1, mRNA [NM_013687]
CUST_3048_PI419772161	1.14687e-05	819.41	up	Lpcat2b	NM_027599	Mus musculus lysophosphatidylcholine acyltransferase 2B (Lpcat2b), mRNA [NM_027599]
CUST_19095_PI419772161	0.0139991	815.006	up	Gm5382	NM_001034100	Mus musculus predicted gene 5382 (Gm5382), mRNA [NM_001034100]
CUST_11386_PI419772161	0.00235683	812.496	up	Lrrc67	NM_027033	Mus musculus leucine rich repeat containing 67 (Lrrc67), transcript variant 1, mRNA [NM_027033]
CUST_4205_PI419772161	0.00036106	809.392	up	Tcp11	NM_001085555	t-complex protein 11 isoform 2
CUST_10977_PI419772161	0.0010642	807.161	up	4921504E06Rik	NM_027600	Mus musculus RIKEN cDNA 4921504E06 gene (4921504E06Rik), mRNA [NM_027600]
CUST_9539_PI419772161	0.000244899	792.838	up	Klk1b26	NM_010644	Mus musculus kallikrein 1-related petidase b26 (Klk1b26), mRNA [NM_010644]
CUST_20733_PI419772161	0.0002857	791.261	up	Zic5	NM_022987	Mus musculus zinc finger protein of the cerebellum 5 (Zic5), mRNA [NM_022987]
CUST_11398_PI419772161	2.35769e-05	788.458	up	Ppp3r2	NM_001004025	Mus musculus protein phosphatase 3, regulatory subunit B, alpha isoform (calcineurin B, type II) (Ppp3r2), mRNA [NM_001004025]
CUST_10467_PI419772161	1.18075e-05	786.783	up	Fam83e	NM_001033170	Mus musculus family with sequence similarity 83, member E (Fam83e), mRNA [NM_001033170]
CUST_715_PI419772161	0.00011454	773.268	up	1700108M19Rik	NM_027699	Mus musculus RIKEN cDNA 1700108M19 gene (1700108M19Rik), transcript variant 1, mRNA [NM_027699]
CUST_415_PI419772161	0.00495191	768.139	up	1700007K09Rik	NM_027037	Mus musculus RIKEN cDNA 1700007K09 gene (1700007K09Rik), mRNA [NM_027037]
CUST_1392_PI419772161	0.000345426	767.204	up	Spink2	NM_183284	Mus musculus serine peptidase inhibitor, Kazal type 2 (Spink2), mRNA [NM_183284]
CUST_17919_PI419772161	0.00366205	763.966	up	Mas1	NM_008552	Mus musculus MAS1 oncogene (Mas1), mRNA [NM_008552]
CUST_14618_PI419772161	4.78931e-05	760.07	up	Spdye4	NM_029048	Mus musculus speedy homolog E4 (Xenopus laevis) (Spdye4), mRNA [NM_029048]
CUST_7203_PI419772161	0.000814156	759.455	up	Armc3	NM_001081083	Mus musculus armadillo repeat containing 3 (Armc3), mRNA [NM_001081083]
CUST_8838_PI419772161	0.00128655	751.085	up	Spag16	NM_029160	sperm associated antigen 16 isoform 1
CUST_18787_PI419772161	0.00150862	735.557	up	Gm381	NM_001111144	hypothetical protein LOC214308
CUST_17738_PI419772161	0.000965509	733.094	up	Sly	NM_201530	Mus musculus Sycp3 like Y-linked (Sly), mRNA [NM_201530]
CUST_453_PI419772161	0.00308285	725.175	up	Cypt7	NM_001039943	Mus musculus cysteine-rich perinuclear theca 7 (Cypt7), mRNA [NM_001039943]
CUST_9649_PI419772161	0.00129001	718.002	up	Dusp21	NM_028568	Mus musculus dual specificity phosphatase 21 (Dusp21), mRNA [NM_028568]
CUST_19008_PI419772161	9.74636e-05	688.996	up	Gm5647	NM_001037167	hypothetical protein LOC434881
CUST_9532_PI419772161	0.00268097	688.979	up	Klk1b11	NM_010640	Mus musculus kallikrein 1-related peptidase b11 (Klk1b11), mRNA [NM_010640]
CUST_7772_PI419772161	0.00178555	688.543	up	Prps1l1	NM_029294	Mus musculus phosphoribosyl pyrophosphate synthetase 1-like 1 (Prps1l1), mRNA [NM_029294]
CUST_6843_PI419772161	0.000450399	679.655	up	1700003M02Rik	NM_027041	Mus musculus RIKEN cDNA 1700003M02 gene (1700003M02Rik), mRNA [NM_027041]
CUST_13353_PI419772161	4.71502e-05	675.865	up	Rya3	NM_194357	Mus musculus antimicrobial peptide RYA3 (Rya3), mRNA [NM_194357]
CUST_2080_PI419772161	0.000628244	671.067	up	BC061194	NM_001001334	Mus musculus cDNA sequence BC061194 (BC061194), mRNA [NM_001001334]
CUST_3760_PI419772161	0.0120323	655.664	up	Fscn3	NM_019569	Mus musculus fascin homolog 3, actin-bundling protein, testicular (Strongylocentrotus purpuratus) (Fscn3), mRNA [NM_019569]
CUST_7565_PI419772161	0.000670393	649.984	up	Cypt4	NM_173412	cysteine-rich perinuclear theca 4
CUST_909_PI419772161	4.05467e-05	646.068	up	Catsperg2	NM_029714	Mus musculus cation channel, sperm-associated, gamma 2 (Catsperg2), mRNA [NM_029714]
CUST_14734_PI419772161	0.00446575	637.98	up	Cpa6	NM_177834	Mus musculus carboxypeptidase A6 (Cpa6), mRNA [NM_177834]
CUST_10995_PI419772161	0.000867545	636.122	up	Ube2u	NM_001033773	Mus musculus ubiquitin-conjugating enzyme E2U (putative) (Ube2u), mRNA [NM_001033773]
CUST_2588_PI419772161	0.00303967	633.11	up	Speer2	NM_173069	Mus musculus spermatogenesis associated glutamate (E)-rich protein 2 (Speer2), mRNA [NM_173069]
CUST_3797_PI419772161	0.000136136	631.981	up	Ankrd61	NM_025732	Mus musculus ankyrin repeat domain 61 (Ankrd61), mRNA [NM_025732]
CUST_9111_PI419772161	0.000432594	630.812	up	Klk1b22	NM_010114	kallikrein 1-related peptidase b22
CUST_9179_PI419772161	0.000273954	625.763	up	Klk1b21	NM_010642	Mus musculus kallikrein 1-related peptidase b21 (Klk1b21), mRNA [NM_010642]
CUST_9536_PI419772161	0.00112298	622.741	up	Klk1b24	NM_010643	Mus musculus kallikrein 1-related peptidase b24 (Klk1b24), mRNA [NM_010643]
CUST_138_PI419772161	0.00642258	622.43	up	EG654453	NM_001039119	defensin beta 33
CUST_11516_PI419772161	0.000782985	621.265	up	4930474N05Rik	NM_175008	Mus musculus RIKEN cDNA 4930474N05 gene (4930474N05Rik), mRNA [NM_175008]
CUST_9658_PI419772161	0.00700432	619.37	up	BC048599	NM_175020	Mus musculus cDNA sequence BC048599 (BC048599), mRNA [NM_175020]
CUST_4575_PI419772161	0.0139608	618.48	up	Gzmd	NM_010372	Mus musculus granzyme D (Gzmd), mRNA [NM_010372]
CUST_10126_PI419772161	0.000271581	613.501	up	Kcne3	NM_020574	Mus musculus potassium voltage-gated channel, Isk-related subfamily, gene 3 (Kcne3), mRNA [NM_020574]
CUST_15087_PI419772161	0.000507594	611.07	up	Cib4	NM_028483	Mus musculus calcium and integrin binding family member 4 (Cib4), mRNA [NM_028483]
CUST_18692_PI419772161	0.00153791	610.843	up	Efcab9	NM_027031	Mus musculus EF-hand calcium binding domain 9 (Efcab9), mRNA [NM_027031]
CUST_16457_PI419772161	0.00243399	603.126	up	1700080E11Rik	NM_028562	Mus musculus RIKEN cDNA 1700080E11 gene (1700080E11Rik), mRNA [NM_028562]
CUST_542_PI419772161	0.000726134	600.103	up	1700019N12Rik	NM_001039494	Mus musculus RIKEN cDNA 1700019N12 gene (1700019N12Rik), mRNA [NM_001039494]
CUST_1896_PI419772161	0.000102042	594.057	up	1700001J03Rik	NM_001008547	Mus musculus RIKEN cDNA 1700001J03 gene (1700001J03Rik), mRNA [NM_001008547]
CUST_18870_PI419772161	0.00127497	593.587	up	Egfbp2	NM_010115	Mus musculus epidermal growth factor binding protein type B (Egfbp2), mRNA [NM_010115]
CUST_7222_PI419772161	0.000390289	591.59	up	4930404N11Rik	NM_001014836	Mus musculus RIKEN cDNA 4930404N11 gene (4930404N11Rik), mRNA [NM_001014836]
CUST_2106_PI419772161	0.000297313	588.939	up	Actrt2	NM_028513	Mus musculus actin-related protein T2 (Actrt2), mRNA [NM_028513]
CUST_778_PI419772161	0.000223063	581.862	up	4930412F15Rik	NM_175517	Mus musculus RIKEN cDNA 4930412F15 gene (4930412F15Rik), mRNA [NM_175517]
CUST_11278_PI419772161	0.00121373	574.479	up	Ttll6	NM_172799	Mus musculus tubulin tyrosine ligase-like family, member 6 (Ttll6), mRNA [NM_172799]
CUST_18994_PI419772161	0.00247806	573.838	up	Gm9758	NM_198666	Mus musculus predicted gene 9758 (Gm9758), mRNA [NM_198666]
CUST_16679_PI419772161	0.0011677	569.962	up	Rsph6a	NM_031255	Mus musculus radial spoke head 6 homolog A (Chlamydomonas) (Rsph6a), transcript variant 1, mRNA [NM_031255]
CUST_3312_PI419772161	0.00109605	566.043	up	Theg	NM_199226	testicular haploid expressed gene product
CUST_19185_PI419772161	0.00443749	565.222	up	Gm5797	NM_001025085	Mus musculus predicted gene 5797 (Gm5797), mRNA [NM_001025085]
CUST_6909_PI419772161	0.002691	555.303	up	Akap14	NM_001033785	Mus musculus A kinase (PRKA) anchor protein 14 (Akap14), mRNA [NM_001033785]
CUST_13338_PI419772161	0.00095331	546.808	up	1700003E16Rik	NM_027948	Mus musculus RIKEN cDNA 1700003E16 gene (1700003E16Rik), mRNA [NM_027948]
CUST_97_PI419772161	0.000995431	546.788	up	1700007G11Rik	NM_001024614	Mus musculus RIKEN cDNA 1700007G11 gene (1700007G11Rik), mRNA [NM_001024614]
CUST_21_PI419772161	0.00133164	543.259	up	1700023E05Rik	NM_027970	Mus musculus RIKEN cDNA 1700023E05 gene (1700023E05Rik), mRNA [NM_027970]
CUST_7214_PI419772161	0.00505827	542.619	up	Armc4	NM_001081393	Mus musculus armadillo repeat containing 4 (Armc4), mRNA [NM_001081393]
CUST_14651_PI419772161	6.66354e-05	538.764	up	Txndc2	NM_001146002	thioredoxin domain containing 2 (spermatozoa)
CUST_19247_PI419772161	0.00127034	531.641	up	Gm4922	NM_177706	Mus musculus predicted gene 4922 (Gm4922), mRNA [NM_177706]
CUST_21846_PI419772161	2.78231e-05	515.034	up	Eps8l3	NM_133867	Mus musculus EPS8-like 3 (Eps8l3), mRNA [NM_133867]
CUST_9227_PI419772161	0.000296122	513.132	up	Fam154a	NM_001081096	Mus musculus family with sequence similarity 154, member A (Fam154a), mRNA [NM_001081096]
CUST_16622_PI419772161	4.47519e-05	510.941	up	Tnp1	NM_009407	Mus musculus transition protein 1 (Tnp1), mRNA [NM_009407]
CUST_1389_PI419772161	0.000864175	507.955	up	Kctd19	NM_177791	Mus musculus potassium channel tetramerisation domain containing 19 (Kctd19), mRNA [NM_177791]
CUST_16681_PI419772161	0.00178872	506.826	up	Rshl1	NM_001159671	radial spokehead-like 1 isoform 2
CUST_7723_PI419772161	0.00217179	501.757	up	Rfx4	NM_027689	regulatory factor X, 4 isoform 2
CUST_113_PI419772161	0.00172078	497.749	up	4930451I11Rik	NM_183131	Mus musculus RIKEN cDNA 4930451I11 gene (4930451I11Rik), mRNA [NM_183131]
CUST_8593_PI419772161	0.00318047	496.884	up	Lrrc69	NM_028499	Mus musculus leucine rich repeat containing 69 (Lrrc69), mRNA [NM_028499]
CUST_3223_PI419772161	0.0104539	492.316	up	Spert	NM_026457	Mus musculus spermatid associated (Spert), transcript variant 2, mRNA [NM_026457]
CUST_1090_PI419772161	0.000137412	490.822	up	Slc22a16	NM_027572	Mus musculus solute carrier family 22 (organic cation transporter), member 16 (Slc22a16), mRNA [NM_027572]
CUST_9475_PI419772161	0.000442184	489.341	up	Atp8b3	NM_026094	Mus musculus ATPase, class I, type 8B, member 3 (Atp8b3), mRNA [NM_026094]
CUST_4538_PI419772161	0.00349199	485.635	up	Cypt2	NM_173436	Mus musculus cysteine-rich perinuclear theca 2 (Cypt2), mRNA [NM_173436]
CUST_8578_PI419772161	0.000307198	482.368	up	Mdh1b	NM_029696	Mus musculus malate dehydrogenase 1B, NAD (soluble) (Mdh1b), mRNA [NM_029696]
CUST_19144_PI419772161	0.004013	480.199	up	Gm16501	NM_001113395	predicted gene 16501
CUST_19246_PI419772161	0.0070823	479.754	up	Gm4871	NM_001101463	hypothetical protein LOC231885
CUST_8375_PI419772161	0.00596416	474.69	up	Wdr63	NM_172864	Mus musculus WD repeat domain 63 (Wdr63), mRNA [NM_172864]
CUST_796_PI419772161	0.000687374	472.528	up	BC051628	NM_199312	Mus musculus cDNA sequence BC051628 (BC051628), mRNA [NM_199312]
CUST_8186_PI419772161	9.0068e-05	465.061	up	Txndc3	NM_181591	Mus musculus thioredoxin domain containing 3 (spermatozoa) (Txndc3), transcript variant 1, mRNA [NM_181591]
CUST_524_PI419772161	0.00163245	463.955	up	1700013B16Rik	NM_028157	Mus musculus RIKEN cDNA 1700013B16 gene (1700013B16Rik), mRNA [NM_028157]
CUST_12411_PI419772161	0.000888518	455.152	up	4930548H24Rik	NM_026296	Mus musculus RIKEN cDNA 4930548H24 gene (4930548H24Rik), mRNA [NM_026296]
CUST_19320_PI419772161	0.000219529	452.731	up	Efcab6	NM_029946	Mus musculus EF-hand calcium binding domain 6 (Efcab6), transcript variant 1, mRNA [NM_029946]
CUST_8228_PI419772161	0.000209031	451.496	up	Hist1h2bp	NM_178202	histone cluster 1, H2bp
CUST_8164_PI419772161	0.000177205	450.846	up	4933400C05Rik	NM_177801	Mus musculus RIKEN cDNA 4933400C05 gene (4933400C05Rik), mRNA [NM_177801]
CUST_1510_PI419772161	0.00110065	448.874	up	4930444G20Rik	NM_053264	Mus musculus RIKEN cDNA 4930444G20 gene (4930444G20Rik), mRNA [NM_053264]
CUST_14650_PI419772161	0.000970451	447.909	up	Txndc2	NM_153519	Mus musculus thioredoxin domain containing 2 (spermatozoa) (Txndc2), transcript variant 2, mRNA [NM_153519]
CUST_7381_PI419772161	0.000947654	446.443	up	Spata17	NM_029067	spermatogenesis associated 17 isoform 2
CUST_14658_PI419772161	0.000693026	444.961	up	Lrrc18	NM_026253	Mus musculus leucine rich repeat containing 18 (Lrrc18), transcript variant 1, mRNA [NM_026253]
CUST_20754_PI419772161	0.00218273	442.379	up	Adam3	NM_009619	a disintegrin and metalloprotease domain 3
CUST_12478_PI419772161	0.00301167	442.07	up	1700027A23Rik	NM_029604	Mus musculus RIKEN cDNA 1700027A23 gene (1700027A23Rik), mRNA [NM_029604]
CUST_881_PI419772161	0.00609286	439.196	up	Agr3	NM_207531	Mus musculus anterior gradient homolog 3 (Xenopus laevis) (Agr3), mRNA [NM_207531]
CUST_18746_PI419772161	0.00504043	437.763	up	Gm382	NM_001033241	hypothetical protein LOC211208
CUST_10909_PI419772161	0.0144072	429.421	up	Rnf151	NM_026205	Mus musculus ring finger protein 151 (Rnf151), mRNA [NM_026205]
CUST_13844_PI419772161	0.000959231	429.195	up	Prss46	NM_183103	Mus musculus protease, serine, 46 (Prss46), mRNA [NM_183103]
CUST_16354_PI419772161	0.00841929	427.938	up	Adam34	NM_145745	a disintegrin and metallopeptidase domain 34
CUST_709_PI419772161	0.0020485	426.47	up	4921528I01Rik	NM_027616	Mus musculus RIKEN cDNA 4921528I01 gene (4921528I01Rik), mRNA [NM_027616]
CUST_19909_PI419772161	0.000607165	423.506	up	Chrne	NM_009603	Mus musculus cholinergic receptor, nicotinic, epsilon polypeptide (Chrne), mRNA [NM_009603]
CUST_463_PI419772161	0.00198908	419.95	up	1700029H14Rik	NM_025601	Mus musculus RIKEN cDNA 1700029H14 gene (1700029H14Rik), transcript variant 1, mRNA [NM_025601]
CUST_11972_PI419772161	0.00171194	418.132	up	Tsnaxip1	NM_024445	Mus musculus translin-associated factor X (Tsnax) interacting protein 1 (Tsnaxip1), mRNA [NM_024445]
CUST_19322_PI419772161	0.000252668	414.36	up	Efcab6	NM_001161629	CAP-binding protein complex interacting protein
CUST_8623_PI419772161	0.0138485	412.744	up	Lrrc23	NM_013588	Mus musculus leucine rich repeat containing 23 (Lrrc23), mRNA [NM_013588]
CUST_8468_PI419772161	0.000332564	412.074	up	Agbl4	NM_030231	Mus musculus ATP/GTP binding protein-like 4 (Agbl4), transcript variant 1, mRNA [NM_030231]
CUST_5085_PI419772161	5.75773e-05	408.36	up	Spesp1	NM_025721	Mus musculus sperm equatorial segment protein 1 (Spesp1), mRNA [NM_025721]
CUST_19321_PI419772161	0.00034893	406.843	up	Efcab6	NM_001161628	CAP-binding protein complex interacting protein
CUST_19074_PI419772161	0.000132834	404.481	up	Gm11435	NM_001045543	Mus musculus predicted gene 11435 (Gm11435), mRNA [NM_001045543]
CUST_861_PI419772161	7.09423e-05	400.846	up	Sun3	NM_177576	Mus musculus Sad1 and UNC84 domain containing 3 (Sun3), mRNA [NM_177576]
CUST_16303_PI419772161	0.000682964	397.209	up	Papolb	NM_019943	Mus musculus poly (A) polymerase beta (testis specific) (Papolb), mRNA [NM_019943]
CUST_528_PI419772161	0.000813949	396.166	up	4933404M02Rik	NM_025744	Mus musculus RIKEN cDNA 4933404M02 gene (4933404M02Rik), mRNA [NM_025744]
CUST_6350_PI419772161	0.000535915	383.601	up	1700125D06Rik	NM_001085491	Mus musculus RIKEN cDNA 1700125D06 gene (1700125D06Rik), mRNA [NM_001085491]
CUST_21732_PI419772161	0.00659378	382.346	up	4932411N23Rik	NM_177705	Mus musculus RIKEN cDNA 4932411N23 gene (4932411N23Rik), mRNA [NM_177705]
CUST_337_PI419772161	0.00142588	381.412	up	4921517D22Rik	NM_183290	Mus musculus RIKEN cDNA 4921517D22 gene (4921517D22Rik), mRNA [NM_183290]
CUST_5001_PI419772161	0.00131885	380.582	up	Nhedc1	NM_028946	Mus musculus Na+/H+ exchanger domain containing 1 (Nhedc1), mRNA [NM_028946]
CUST_935_PI419772161	0.000511296	379.872	up	1700093K21Rik	NM_026105	Mus musculus RIKEN cDNA 1700093K21 gene (1700093K21Rik), transcript variant 1, mRNA [NM_026105]
CUST_4125_PI419772161	6.71783e-05	375.913	up	Wdr20b	NM_027614	Mus musculus WD repeat domain 20b (Wdr20b), mRNA [NM_027614]
CUST_8469_PI419772161	0.000375325	371.965	up	Agbl4	NM_001048189	carboxypeptidase 6, cytosolic isoform 2
CUST_8308_PI419772161	0.00141156	371.229	up	Ccin	NM_001002787	Mus musculus calicin (Ccin), mRNA [NM_001002787]
CUST_9329_PI419772161	0.00242793	370.046	up	Tpte	NM_199257	Mus musculus transmembrane phosphatase with tensin homology (Tpte), mRNA [NM_199257]
CUST_2858_PI419772161	0.000180192	364.47	up	Adam21	NM_020330	Mus musculus a disintegrin and metallopeptidase domain 21 (Adam21), mRNA [NM_020330]
CUST_6193_PI419772161	0.0108621	362.16	up	Adam39	NM_001025380	Mus musculus a disintegrin and metallopeptidase domain 39 (Adam39), mRNA [NM_001025380]
CUST_17660_PI419772161	0.00238625	362.012	up	Ssty2	NM_023546	spermiogenesis specific transcript on the Y 2
CUST_16625_PI419772161	0.00142322	359.837	up	Glt6d1	NM_001039095	galactosyltransferase family 6 domain containing
CUST_6192_PI419772161	0.00649644	355.077	up	Slc5a4b	NM_023219	Mus musculus solute carrier family 5 (neutral amino acid transporters, system A), member 4b (Slc5a4b), mRNA [NM_023219]
CUST_12168_PI419772161	0.000355104	354.419	up	Fyb	NM_011815	Mus musculus FYN binding protein (Fyb), mRNA [NM_011815]
CUST_936_PI419772161	1.61362e-05	352.259	up	1700093K21Rik	NM_001110133	hypothetical protein LOC67358
CUST_573_PI419772161	0.00228964	348.205	up	Ccdc33	NM_029212	Mus musculus coiled-coil domain containing 33 (Ccdc33), transcript variant 2, mRNA [NM_029212]
CUST_15413_PI419772161	0.0007427	347.681	up	Spata18	NM_178387	Mus musculus spermatogenesis associated 18 (Spata18), mRNA [NM_178387]
CUST_14885_PI419772161	0.0121048	346.761	up	Cd96	NM_032465	Mus musculus CD96 antigen (Cd96), mRNA [NM_032465]
CUST_15200_PI419772161	0.000393902	346.032	up	Epha6	NM_007938	Mus musculus Eph receptor A6 (Epha6), mRNA [NM_007938]
CUST_990_PI419772161	4.03184e-05	344.635	up	1700020L24Rik	NM_025492	Mus musculus RIKEN cDNA 1700020L24 gene (1700020L24Rik), mRNA [NM_025492]
CUST_17771_PI419772161	0.00137383	344.426	up	Acsbg2	NM_001039114	Mus musculus acyl-CoA synthetase bubblegum family member 2 (Acsbg2), mRNA [NM_001039114]
CUST_16943_PI419772161	0.003124	337.643	up	Rfpl3s	NM_183111	Mus musculus RFPL3 antisense RNA (non-protein coding) (Rfpl3s), mRNA [NM_183111]
CUST_394_PI419772161	0.00246063	336.406	up	LOC434960	NM_001025241	Mus musculus similar to spermiogenesis specific transcript on the Y 2 (LOC434960), mRNA [NM_001025241]
CUST_3995_PI419772161	0.000385362	336.221	up	Adam5	NM_007401	Mus musculus a disintegrin and metallopeptidase domain 5 (Adam5), mRNA [NM_007401]
CUST_18753_PI419772161	0.000303778	335.864	up	Gm906	NM_001033438	hypothetical protein LOC380882
CUST_7199_PI419772161	4.31744e-05	334.837	up	Lrrc34	NM_027941	Mus musculus leucine rich repeat containing 34 (Lrrc34), mRNA [NM_027941]
CUST_7053_PI419772161	0.0007407	332.637	up	Smok3b	NM_001039889	Mus musculus sperm motility kinase 3B (Smok3b), mRNA [NM_001039889]
CUST_4984_PI419772161	0.000588807	332.437	up	1700020D05Rik	NM_023781	Mus musculus RIKEN cDNA 1700020D05 gene (1700020D05Rik), mRNA [NM_023781]
CUST_6642_PI419772161	0.00571458	330.542	up	Spata3	NM_028647	testis and spermatogenesis cell apoptosis
CUST_11480_PI419772161	0.00132612	327.094	up	4933411G11Rik	NM_177880	Mus musculus RIKEN cDNA 4933411G11Rik gene (4933411G11Rik), mRNA [NM_177880]
CUST_773_PI419772161	0.00763803	324.96	up	4933402J07Rik	NM_177901	Mus musculus RIKEN cDNA 4933402J07 gene (4933402J07Rik), mRNA [NM_177901]
CUST_21934_PI419772161	0.000369456	324.351	up	Hdgfl1	NM_008232	Mus musculus hepatoma derived growth factor-like 1 (Hdgfl1), mRNA [NM_008232]
CUST_16833_PI419772161	0.001114	317.074	up	Wdr69	NM_027725	Mus musculus WD repeat domain 69 (Wdr69), transcript variant 1, mRNA [NM_027725]
CUST_14448_PI419772161	0.000266009	315.996	up	Catsper3	NM_029772	Mus musculus cation channel, sperm associated 3 (Catsper3), mRNA [NM_029772]
CUST_18825_PI419772161	0.00802773	315.008	up	Gm3750	NM_001099643	hypothetical protein LOC100042254
CUST_9387_PI419772161	0.000221235	310.565	up	Dyrk4	NM_207210	Mus musculus dual-specificity tyrosine-(Y)-phosphorylation regulated kinase 4 (Dyrk4), mRNA [NM_207210]
CUST_17176_PI419772161	0.000827718	310.455	up	Slc14a2	NM_030683	Mus musculus solute carrier family 14 (urea transporter), member 2 (Slc14a2), transcript variant 2, mRNA [NM_030683]
CUST_8801_PI419772161	0.00515456	310.241	up	Fam123a	NM_028113	Mus musculus family with sequence similarity 123, member A (Fam123a), transcript variant 1, mRNA [NM_028113]
CUST_189_PI419772161	0.000828361	308.717	up	1700026L06Rik	NM_027283	Mus musculus RIKEN cDNA 1700026L06 gene (1700026L06Rik), mRNA [NM_027283]
CUST_21909_PI419772161	0.0063488	307.884	up	Gm6583	NM_001039228	Mus musculus predicted gene 6583 (Gm6583), mRNA [NM_001039228]
CUST_1977_PI419772161	0.00638691	307.641	up	Cabyr	NM_001042418	calcium-binding tyrosine-phosphorylation
CUST_6890_PI419772161	0.0021214	304.763	up	Tuba8	NM_017379	Mus musculus tubulin, alpha 8 (Tuba8), mRNA [NM_017379]
CUST_18747_PI419772161	0.00498576	304.153	up	Gm711	NM_198628	Mus musculus predicted gene 711 (Gm711), mRNA [NM_198628]
CUST_1067_PI419772161	5.61195e-05	301.182	up	BC048609	NM_001111317	hypothetical protein LOC433215
CUST_15750_PI419772161	0.00101644	291.826	up	Cct6b	NM_009839	Mus musculus chaperonin containing Tcp1, subunit 6b (zeta) (Cct6b), mRNA [NM_009839]
CUST_7745_PI419772161	0.00212969	291.782	up	Rfx4	NM_001024918	Mus musculus regulatory factor X, 4 (influences HLA class II expression) (Rfx4), transcript variant 1, mRNA [NM_001024918]
CUST_10551_PI419772161	0.000425582	290.291	up	Lrrc46	NM_027026	Mus musculus leucine rich repeat containing 46 (Lrrc46), mRNA [NM_027026]
CUST_20909_PI419772161	5.83893e-06	288.287	up	Ghrl	NM_021488	Mus musculus ghrelin (Ghrl), mRNA [NM_021488]
CUST_9180_PI419772161	0.00661355	286.901	up	Gapdhs	NM_008085	Mus musculus glyceraldehyde-3-phosphate dehydrogenase, spermatogenic (Gapdhs), mRNA [NM_008085]
CUST_10945_PI419772161	0.00123714	280.212	up	Dnali1	NM_175223	Mus musculus dynein, axonemal, light intermediate polypeptide 1 (Dnali1), mRNA [NM_175223]
CUST_2074_PI419772161	0.00134598	278.305	up	Fbxl13	NM_177076	Mus musculus F-box and leucine-rich repeat protein 13 (Fbxl13), mRNA [NM_177076]
CUST_21063_PI419772161	0.00393761	276.761	up	Ccr6	NM_009835	Mus musculus chemokine (C-C motif) receptor 6 (Ccr6), mRNA [NM_009835]
CUST_15373_PI419772161	0.000850442	276.372	up	Sept10	NM_001024910	Mus musculus septin 10 (Sept10), transcript variant 1, mRNA [NM_001024910]
CUST_15953_PI419772161	0.00273196	271.737	up	Cytl1	NM_001081106	Mus musculus cytokine-like 1 (Cytl1), mRNA [NM_001081106]
CUST_8422_PI419772161	0.00139807	269.281	up	1700029J11Rik	NM_029608	Mus musculus RIKEN cDNA 1700029J11 gene (1700029J11Rik), mRNA [NM_029608]
CUST_870_PI419772161	0.000781018	268.62	up	Ccdc60	NM_177759	Mus musculus coiled-coil domain containing 60 (Ccdc60), mRNA [NM_177759]
CUST_1634_PI419772161	5.72024e-05	268.166	up	4930408O21Rik	NM_001040137	hypothetical protein LOC67983 isoform 2
CUST_13719_PI419772161	0.000444576	267.972	up	1700018A14Rik	NM_001145259	Mus musculus RIKEN cDNA 1700018A14 gene (1700018A14Rik), mRNA [NM_001145259]
CUST_3235_PI419772161	0.017793	267.51	up	Olfr113	NM_146289	Mus musculus olfactory receptor 113 (Olfr113), mRNA [NM_146289]
CUST_13012_PI419772161	0.000129265	265.963	up	Cst13	NM_027024	Mus musculus cystatin 13 (Cst13), mRNA [NM_027024]
CUST_5123_PI419772161	0.00807073	265.308	up	2010109I03Rik	NM_025929	Mus musculus RIKEN cDNA 2010109I03 gene (2010109I03Rik), mRNA [NM_025929]
CUST_1015_PI419772161	0.021981	265.205	up	LOC100042109	NM_001099325	hypothetical protein LOC100042109
CUST_11581_PI419772161	0.000465728	259	up	Mfi2	NM_013900	Mus musculus antigen p97 (melanoma associated) identified by monoclonal antibodies 133.2 and 96.5 (Mfi2), mRNA [NM_013900]
CUST_13321_PI419772161	0.000426398	255.192	up	3110047P20Rik	NM_177006	Mus musculus RIKEN cDNA 3110047P20 gene (3110047P20Rik), mRNA [NM_177006]
CUST_3982_PI419772161	0.00369951	252.038	up	Ankrd5	NM_175667	Mus musculus ankyrin repeat domain 5 (Ankrd5), mRNA [NM_175667]
CUST_217_PI419772161	0.00147288	251.192	up	Ccdc116	NM_029779	Mus musculus coiled-coil domain containing 116 (Ccdc116), transcript variant 2, mRNA [NM_029779]
CUST_21772_PI419772161	0.00231276	246.791	up	Prl3c1	NM_013766	Mus musculus prolactin family 3, subfamily c, member 1 (Prl3c1), transcript variant 1, mRNA [NM_013766]
CUST_18969_PI419772161	0.00025597	246.298	up	Gm9047	NM_001145360	hypothetical protein LOC668210
CUST_2425_PI419772161	0.00294999	245.855	up	Abpe	NM_207262	Mus musculus androgen binding protein epsilon (Abpe), mRNA [NM_207262]
CUST_3674_PI419772161	0.000267198	240.935	up	Cabyr	NM_001042419	calcium-binding tyrosine-phosphorylation
CUST_17181_PI419772161	5.78327e-05	240.311	up	Slc14a2	NM_001110274	solute carrier family 14 (urea transporter),
CUST_4101_PI419772161	0.003626	237.412	up	Ssxb10	NM_199064	synovial sarcoma, X member B, breakpoint 10
CUST_2043_PI419772161	0.00026082	235.734	up	Pnma1	NM_027438	Mus musculus paraneoplastic antigen MA1 (Pnma1), mRNA [NM_027438]
CUST_5243_PI419772161	0.00533543	235.287	up	Dnajb8	NM_019964	Mus musculus DnaJ (Hsp40) homolog, subfamily B, member 8 (Dnajb8), mRNA [NM_019964]
CUST_123_PI419772161	0.000620287	234.567	up	Hsf5	NM_001045527	Mus musculus heat shock transcription factor family member 5 (Hsf5), mRNA [NM_001045527]
CUST_7018_PI419772161	0.0028971	233.872	up	4930402F06Rik	NM_001080709	Mus musculus RIKEN cDNA 4930402F06 gene (4930402F06Rik), mRNA [NM_001080709]
CUST_281_PI419772161	0.00773929	233.738	up	4921510H08Rik	NM_025724	Mus musculus RIKEN cDNA 4921510H08 gene (4921510H08Rik), mRNA [NM_025724]
CUST_18980_PI419772161	0.00210575	232.01	up	Gm4907	NM_001034864	Mus musculus predicted gene 4907 (Gm4907), mRNA [NM_001034864]
CUST_4106_PI419772161	0.000137444	229.616	up	Abpd	NM_001009952	Mus musculus androgen binding protein delta (Abpd), mRNA [NM_001009952]
CUST_5563_PI419772161	0.00022535	229.05	up	Cabyr	NM_001042420	calcium-binding tyrosine-phosphorylation
CUST_5097_PI419772161	8.26354e-05	228.251	up	Ston1	NM_029858	Mus musculus stonin 1 (Ston1), mRNA [NM_029858]
CUST_5554_PI419772161	0.00065545	228.034	up	Cabyr	NM_181731	calcium-binding tyrosine-phosphorylation
CUST_1736_PI419772161	0.000570996	225.408	up	Zpbp2	NM_199419	zona pellucida binding protein 2 isoform 2
CUST_11173_PI419772161	0.000265236	224.091	up	Klhl10	NM_025727	Mus musculus kelch-like 10 (Drosophila) (Klhl10), mRNA [NM_025727]
CUST_2761_PI419772161	0.0001231	223.863	up	Cabyr	NM_027687	Mus musculus calcium-binding tyrosine-(Y)-phosphorylation regulated (fibrousheathin 2) (Cabyr), transcript variant 1, mRNA [NM_027687]
CUST_2060_PI419772161	0.00175144	221.736	up	4921517D21Rik	NM_026338	Mus musculus RIKEN cDNA 4921517D21 gene (4921517D21Rik), mRNA [NM_026338]
CUST_8204_PI419772161	0.000282299	221.241	up	1700010I14Rik	NM_025851	Mus musculus RIKEN cDNA 1700010I14 gene (1700010I14Rik), mRNA [NM_025851]
CUST_8999_PI419772161	0.00254859	220.391	up	Klk1b3	NM_008693	Mus musculus kallikrein 1-related peptidase b3 (Klk1b3), mRNA [NM_008693]
CUST_16711_PI419772161	0.0118967	218.775	up	Prdx6-rs1	NM_177256	Mus musculus peroxiredoxin 6, related sequence 1 (Prdx6-rs1), mRNA [NM_177256]
CUST_3715_PI419772161	0.000336787	216.472	up	Zpbp2	NM_027061	Mus musculus zona pellucida binding protein 2 (Zpbp2), transcript variant 1, mRNA [NM_027061]
CUST_16989_PI419772161	0.000342528	215.868	up	Tepp	NM_199455	Mus musculus testis, prostate and placenta expressed (Tepp), transcript variant 1, mRNA [NM_199455]
CUST_18733_PI419772161	0.000195405	215.486	up	Gm1661	NM_001145637	Mus musculus predicted gene 1661 (Gm1661), transcript variant 1, mRNA [NM_001145637]
CUST_15216_PI419772161	0.00253262	214.905	up	Dlx5	NM_010056	Mus musculus distal-less homeobox 5 (Dlx5), transcript variant 1, mRNA [NM_010056]
CUST_14713_PI419772161	0.00740917	214.4	up	Myl10	NM_021611	Mus musculus myosin, light chain 10, regulatory (Myl10), transcript variant 1, mRNA [NM_021611]
CUST_392_PI419772161	0.00257939	207.363	up	1700029F12Rik	NM_001080777	hypothetical protein LOC66479 isoform 1
CUST_906_PI419772161	0.0085354	206.439	up	Defb21	NM_207276	beta-defensin 21
CUST_16990_PI419772161	0.000245397	205.83	up	Tepp	NM_028532	testis/prostate/placenta-expressed protein
CUST_26_PI419772161	0.00117025	204.681	up	1700018B08Rik	NM_029597	Mus musculus RIKEN cDNA 1700018B08 gene (1700018B08Rik), mRNA [NM_029597]
CUST_14021_PI419772161	0.00701485	203.679	up	4930571K23Rik	NM_001145759	hypothetical protein LOC75861
CUST_18524_PI419772161	0.0032048	203.454	up	Tmsb15a	NM_030106	Mus musculus thymosin beta 15a (Tmsb15a), mRNA [NM_030106]
CUST_735_PI419772161	0.00101286	199.429	up	Tsga13	NM_054073	Mus musculus testis specific gene A13 (Tsga13), mRNA [NM_054073]
CUST_3059_PI419772161	0.0106059	196.41	up	Dynlrb2	NM_029297	Mus musculus dynein light chain roadblock-type 2 (Dynlrb2), mRNA [NM_029297]
CUST_22000_PI419772161	0.000515795	196.248	up	Mesp1	NM_008588	Mus musculus mesoderm posterior 1 (Mesp1), mRNA [NM_008588]
CUST_9892_PI419772161	0.000490322	196.13	up	Gpx6	NM_145451	Mus musculus glutathione peroxidase 6 (Gpx6), mRNA [NM_145451]
CUST_9919_PI419772161	0.000170927	195.922	up	Oit1	NM_146050	Mus musculus oncoprotein induced transcript 1 (Oit1), mRNA [NM_146050]
CUST_22266_PI419772161	0.00107709	194.875	up	Dlx6	NM_010057	Mus musculus distal-less homeobox 6 (Dlx6), mRNA [NM_010057]
CUST_10659_PI419772161	0.00218521	194.716	up	1700001C02Rik	NM_029285	Mus musculus RIKEN cDNA 1700001C02 gene (1700001C02Rik), mRNA [NM_029285]
CUST_7510_PI419772161	0.000269135	193.747	up	Efcab3	NM_001081046	Mus musculus EF-hand calcium binding domain 3 (Efcab3), mRNA [NM_001081046]
CUST_11139_PI419772161	0.00160813	193.176	up	Sphkap	NM_172430	Mus musculus SPHK1 interactor, AKAP domain containing (Sphkap), mRNA [NM_172430]
CUST_18639_PI419772161	0.0234004	190.472	up	Pdzk1	NM_021517	Mus musculus PDZ domain containing 1 (Pdzk1), transcript variant 1, mRNA [NM_021517]
CUST_6314_PI419772161	0.00017809	189.993	up	1700011A15Rik	NM_025487	Mus musculus RIKEN cDNA 1700011A15 gene (1700011A15Rik), mRNA [NM_025487]
CUST_17024_PI419772161	0.000117737	189.61	up	St6galnac2	NM_009180	Mus musculus ST6 (alpha-N-acetyl-neuraminyl-2,3-beta-galactosyl-1,3)-N-acetylgalactosaminide alpha-2,6-sialyltransferase 2 (St6galnac2), mRNA [NM_009180]
CUST_21346_PI419772161	0.00115585	189.176	up	Adam4	NM_009620	Mus musculus a disintegrin and metallopeptidase domain 4 (Adam4), mRNA [NM_009620]
CUST_7481_PI419772161	0.00051935	187.118	up	Nkx2-6	NM_010920	Mus musculus NK2 transcription factor related, locus 6 (Drosophila) (Nkx2-6), mRNA [NM_010920]
CUST_103_PI419772161	0.00862582	186.4	up	4921506M07Rik	NM_001037743	Mus musculus RIKEN cDNA 4921506M07 gene (4921506M07Rik), mRNA [NM_001037743]
CUST_59_PI419772161	0.00114986	185.963	up	1700025K23Rik	NM_183254	Mus musculus RIKEN cDNA 1700025K23 gene (1700025K23Rik), mRNA [NM_183254]
CUST_8258_PI419772161	7.81889e-05	183.202	up	4921517L17Rik	NM_027585	Mus musculus RIKEN cDNA 4921517L17 gene (4921517L17Rik), mRNA [NM_027585]
CUST_15217_PI419772161	0.00173705	182.48	up	Dlx5	NM_198854	distal-less homeobox 5 isoform 2
CUST_15370_PI419772161	0.000392532	181.961	up	Ttll2	NM_001098267	tubulin tyrosine ligase-like family, member 2
CUST_102_PI419772161	0.000982802	181.33	up	LOC380994	NM_001037748	hypothetical protein LOC380994
CUST_841_PI419772161	0.00276512	180.577	up	Ankar	NM_176980	Mus musculus ankyrin and armadillo repeat containing (Ankar), mRNA [NM_176980]
CUST_16699_PI419772161	0.000479678	180.393	up	Fam50b	NM_138746	Mus musculus family with sequence similarity 50, member B (Fam50b), mRNA [NM_138746]
CUST_19007_PI419772161	0.00383767	179.956	up	Gm10731	NM_001129886	hypothetical protein LOC100039043
CUST_19473_PI419772161	0.000683382	179.689	up	Umodl1	NM_177465	Mus musculus uromodulin-like 1 (Umodl1), mRNA [NM_177465]
CUST_13308_PI419772161	0.000487176	179.107	up	Ccna1	NM_007628	Mus musculus cyclin A1 (Ccna1), mRNA [NM_007628]
CUST_5286_PI419772161	3.27892e-05	178.596	up	Rasl2-9	NM_009028	Mus musculus RAS-like, family 2, locus 9 (Rasl2-9), mRNA [NM_009028]
CUST_1013_PI419772161	0.000146097	178.271	up	E330034G19Rik	NM_001033214	Mus musculus RIKEN cDNA E330034G19 gene (E330034G19Rik), mRNA [NM_001033214]
CUST_18955_PI419772161	0.00537861	177.474	up	Gm5114	NM_177890	Mus musculus predicted gene 5114 (Gm5114), mRNA [NM_177890]
CUST_16463_PI419772161	0.000641032	176.526	up	4933439F11Rik	NM_025766	Mus musculus RIKEN cDNA 4933439F11 gene (4933439F11Rik), mRNA [NM_025766]
CUST_10966_PI419772161	0.00477123	176.494	up	Odf3b	NM_001013022	Mus musculus outer dense fiber of sperm tails 3B (Odf3b), mRNA [NM_001013022]
CUST_5258_PI419772161	0.00164439	174.852	up	Hist1h3a	NM_013550	Mus musculus histone cluster 1, H3a (Hist1h3a), mRNA [NM_013550]
CUST_15080_PI419772161	0.000475098	174.45	up	Fam186b	NM_001081254	Mus musculus family with sequence similarity 186, member B (Fam186b), mRNA [NM_001081254]
CUST_4518_PI419772161	0.0018636	173.89	up	4930408O21Rik	NM_001040136	hypothetical protein LOC67983 isoform 1
CUST_16814_PI419772161	5.75153e-05	172.839	up	Triml1	NM_177742	Mus musculus tripartite motif family-like 1 (Triml1), mRNA [NM_177742]
CUST_5495_PI419772161	0.0013863	172.516	up	Tmprss12	NM_183109	Mus musculus transmembrane (C-terminal) protease, serine 12 (Tmprss12), mRNA [NM_183109]
CUST_6939_PI419772161	0.00255114	171.932	up	Tcte3	NM_011560	t-complex-associated testis expressed 3 isoform
CUST_16805_PI419772161	0.00403769	171.8	up	Cfhr1	NM_015780	Mus musculus complement factor H-related 1 (Cfhr1), mRNA [NM_015780]
CUST_472_PI419772161	0.00318659	171.408	up	Gm16387	NM_001024727	Mus musculus predicted gene 16387 (Gm16387), mRNA [NM_001024727]
CUST_6842_PI419772161	2.0961e-05	171.153	up	1700008I05Rik	NM_027952	Mus musculus RIKEN cDNA 1700008I05 gene (1700008I05Rik), mRNA [NM_027952]
CUST_8619_PI419772161	0.0424134	170.494	up	Prss40	NM_009356	Mus musculus protease, serine, 40 (Prss40), mRNA [NM_009356]
CUST_722_PI419772161	0.00345905	169.573	up	1700018C11Rik	NM_029324	Mus musculus RIKEN cDNA 1700018C11 gene (1700018C11Rik), mRNA [NM_029324]
CUST_987_PI419772161	6.62425e-05	169.379	up	Fank1	NM_025850	Mus musculus fibronectin type 3 and ankyrin repeat domains 1 (Fank1), mRNA [NM_025850]
CUST_16892_PI419772161	0.00278555	169.346	up	2310007A19Rik	NM_025506	Mus musculus RIKEN cDNA 2310007A19Rik (2310007A19Rik), mRNA [NM_025506]
CUST_21631_PI419772161	0.00018739	167.198	up	4930579C15Rik	NM_027089	Mus musculus RIKEN cDNA 4930579C15 gene (4930579C15Rik), mRNA [NM_027089]
CUST_18277_PI419772161	4.27421e-07	167.004	up	Cdkl1	NM_183294	Mus musculus cyclin-dependent kinase-like 1 (CDC2-related kinase) (Cdkl1), mRNA [NM_183294]
CUST_18025_PI419772161	0.000798812	166.445	up	Klk1b1	NM_010645	Mus musculus kallikrein 1-related peptidase b1 (Klk1b1), mRNA [NM_010645]
CUST_15959_PI419772161	0.00328787	166.246	up	Padi6	NM_153106	Mus musculus peptidyl arginine deiminase, type VI (Padi6), mRNA [NM_153106]
CUST_15434_PI419772161	0.000189541	166.07	up	Slc25a2	NM_001159275	Mus musculus solute carrier family 25 (mitochondrial carrier, ornithine transporter) member 2 (Slc25a2), nuclear gene encoding mitochondrial protein, mRNA [NM_001159275]
CUST_16722_PI419772161	0.000638134	165.069	up	Nlrp14	NM_001002894	Mus musculus NLR family, pyrin domain containing 14 (Nlrp14), mRNA [NM_001002894]
CUST_8273_PI419772161	0.00791076	164.495	up	1700012L04Rik	NM_029588	Mus musculus RIKEN cDNA 1700012L04 gene (1700012L04Rik), mRNA [NM_029588]
CUST_253_PI419772161	0.0104547	163.932	up	Ccdc67	NM_181816	Mus musculus coiled-coil domain containing 67 (Ccdc67), mRNA [NM_181816]
CUST_14932_PI419772161	7.99789e-05	163.709	up	Aqp8	NM_007474	Mus musculus aquaporin 8 (Aqp8), transcript variant 1, mRNA [NM_007474]
CUST_4384_PI419772161	0.0113794	162.711	up	Hyal6	NM_028920	Mus musculus hyaluronoglucosaminidase 6 (Hyal6), mRNA [NM_028920]
CUST_18119_PI419772161	0.000345157	161.647	up	Ankmy1	NM_172850	Mus musculus ankyrin repeat and MYND domain containing 1 (Ankmy1), mRNA [NM_172850]
CUST_19688_PI419772161	0.000948458	161.583	up	Adora3	NM_009631	Mus musculus adenosine A3 receptor (Adora3), transcript variant 1, mRNA [NM_009631]
CUST_730_PI419772161	0.000835689	160.524	up	1700065I17Rik	NM_026099	Mus musculus RIKEN cDNA 1700065I17 gene (1700065I17Rik), mRNA [NM_026099]
CUST_21952_PI419772161	1.41077e-05	160.178	up	Il4i1	NM_010215	Mus musculus interleukin 4 induced 1 (Il4i1), mRNA [NM_010215]
CUST_18946_PI419772161	0.000535631	160.044	up	Gm11565	NM_001126323	hypothetical protein LOC670550
CUST_21785_PI419772161	0.00330068	159.999	up	4932441B19Rik	NM_001083890	hypothetical protein LOC238683
CUST_9355_PI419772161	0.00348928	159.758	up	F11	NM_028066	Mus musculus coagulation factor XI (F11), mRNA [NM_028066]
CUST_19261_PI419772161	0.00130411	157.583	up	Gm5168	NM_001025607	Mus musculus predicted gene 5168 (Gm5168), mRNA [NM_001025607]
CUST_7168_PI419772161	0.000572513	157.471	up	Wdr16	NM_027963	Mus musculus WD repeat domain 16 (Wdr16), mRNA [NM_027963]
CUST_14357_PI419772161	0.0015028	155.74	up	Ttc16	NM_177384	Mus musculus tetratricopeptide repeat domain 16 (Ttc16), mRNA [NM_177384]
CUST_3188_PI419772161	8.12812e-06	155.478	up	0610010O12Rik	NM_001081365	hypothetical protein LOC66060
CUST_14810_PI419772161	0.00275881	154.75	up	Sun5	NM_029599	Mus musculus Sad1 and UNC84 domain containing 5 (Sun5), mRNA [NM_029599]
CUST_7149_PI419772161	0.000592106	154.671	up	Ccdc65	NM_153518	Mus musculus coiled-coil domain containing 65 (Ccdc65), mRNA [NM_153518]
CUST_21885_PI419772161	0.000441901	153.616	up	Chi3l3	NM_009892	Mus musculus chitinase 3-like 3 (Chi3l3), mRNA [NM_009892]
CUST_2236_PI419772161	6.47791e-05	153.596	up	Vmn1r181	NM_207546	Mus musculus vomeronasal 1 receptor 181 (Vmn1r181), mRNA [NM_207546]
CUST_10754_PI419772161	0.00431752	153.141	up	LOC100233207	NM_001142953	Mus musculus hypothetical protein LOC100233207 (LOC100233207), mRNA [NM_001142953]
CUST_7181_PI419772161	0.00497688	152.52	up	1700024G13Rik	NM_001034037	Mus musculus RIKEN cDNA 1700024G13 gene (1700024G13Rik), mRNA [NM_001034037]
CUST_16452_PI419772161	0.00156747	152.248	up	Lemd1	NM_001033250	Mus musculus LEM domain containing 1 (Lemd1), mRNA [NM_001033250]
CUST_18642_PI419772161	0.0202695	152.132	up	Pdzk1	NM_001146001	PDZ domain containing 1
CUST_13818_PI419772161	0.0159685	151.261	up	Cntnap5a	NM_001077425	Mus musculus contactin associated protein-like 5A (Cntnap5a), mRNA [NM_001077425]
CUST_11154_PI419772161	0.000893681	149.939	up	Celf3	NM_172434	Mus musculus VCUGBP, Elav-like family member 3 (Celf3), mRNA [NM_172434]
CUST_16863_PI419772161	4.54313e-05	148.305	up	Pde1c	NM_001159960	phosphodiesterase 1C isoform b
CUST_20729_PI419772161	0.0014776	147.772	up	Asb14	NM_080856	ankyrin repeat and SOCS box-containing 14
CUST_15748_PI419772161	0.000864367	146.016	up	Spag6	NM_015773	Mus musculus sperm associated antigen 6 (Spag6), mRNA [NM_015773]
CUST_7198_PI419772161	0.00260835	145.975	up	1700019L03Rik	NM_025619	Mus musculus RIKEN cDNA 1700019L03 gene (1700019L03Rik), mRNA [NM_025619]
CUST_14387_PI419772161	0.0118092	145.834	up	Ccdc144b	NM_178418	Mus musculus coiled-coil domain containing 144B (Ccdc144b), mRNA [NM_178418]
CUST_13971_PI419772161	3.0115e-05	144.683	up	Slamf7	NM_144539	Mus musculus SLAM family member 7 (Slamf7), mRNA [NM_144539]
CUST_1042_PI419772161	0.00049003	143.663	up	Bex6	NM_001033539	brain expressed gene 6
CUST_22225_PI419772161	0.000445991	142.306	up	Efhb	NM_172497	Mus musculus EF hand domain family, member B (Efhb), mRNA [NM_172497]
CUST_12179_PI419772161	0.00113726	141.884	up	4930596D02Rik	NM_001033766	Mus musculus RIKEN cDNA 4930596D02 gene (4930596D02Rik), mRNA [NM_001033766]
CUST_17716_PI419772161	0.000984241	141.767	up	LOC100039810	NM_001160144	hypothetical protein LOC100039810
CUST_1694_PI419772161	0.00478506	139.424	up	Abcc12	NM_172912	Mus musculus ATP-binding cassette, sub-family C (CFTR/MRP), member 12 (Abcc12), mRNA [NM_172912]
CUST_21914_PI419772161	0.0110589	137.245	up	Rxfp2	NM_080468	Mus musculus relaxin/insulin-like family peptide receptor 2 (Rxfp2), mRNA [NM_080468]
CUST_811_PI419772161	4.91643e-05	137.075	up	4931440F15Rik	NM_176829	Mus musculus RIKEN cDNA 4931440F15 gene (4931440F15Rik), mRNA [NM_176829]
CUST_7480_PI419772161	0.00030173	136.099	up	Als2cr12	NM_175370	Mus musculus amyotrophic lateral sclerosis 2 (juvenile) chromosome region, candidate 12 (human) (Als2cr12), mRNA [NM_175370]
CUST_309_PI419772161	0.00501266	135.854	up	4930521A18Rik	NM_029062	Mus musculus RIKEN cDNA 4930521A18 gene (4930521A18Rik), mRNA [NM_029062]
CUST_21951_PI419772161	0.00101143	135.746	up	Aym1	NM_001012726	Mus musculus activator of yeast meiotic promoters 1 (Aym1), mRNA [NM_001012726]
CUST_2816_PI419772161	0.00226129	135.522	up	Try5	NM_001003405	Mus musculus trypsin 5 (Try5), mRNA [NM_001003405]
CUST_3809_PI419772161	0.00162971	135.329	up	Defb15	NM_139222	Mus musculus defensin beta 15 (Defb15), mRNA [NM_139222]
CUST_18923_PI419772161	0.00302162	134.366	up	1700006A11Rik	NM_027939	Mus musculus RIKEN cDNA 1700006A11 gene (1700006A11Rik), mRNA [NM_027939]
CUST_16862_PI419772161	0.000409645	134.323	up	Pde1c	NM_001159957	phosphodiesterase 1C isoform e
CUST_15417_PI419772161	4.55985e-05	133.879	up	Fam71e1	NM_028169	Mus musculus family with sequence similarity 71, member E1 (Fam71e1), mRNA [NM_028169]
CUST_13333_PI419772161	0.000100478	133.19	up	1700023A16Rik	NM_027059	Mus musculus RIKEN cDNA 1700023A16 gene (1700023A16Rik), mRNA [NM_027059]
CUST_15888_PI419772161	0.000173172	132.304	up	Kdm4d	NM_173433	Mus musculus lysine (K)-specific demethylase 4D (Kdm4d), mRNA [NM_173433]
CUST_15724_PI419772161	0.0037936	132.225	up	Pdzk1ip1	NM_026018	Mus musculus PDZK1 interacting protein 1 (Pdzk1ip1), transcript variant 2, mRNA [NM_026018]
CUST_16854_PI419772161	1.47196e-05	132.086	up	Pde1c	NM_001159952	phosphodiesterase 1C isoform c
CUST_9385_PI419772161	0.00095157	131.604	up	Spaca5	NM_001085393	Mus musculus sperm acrosome associated 5 (Spaca5), mRNA [NM_001085393]
CUST_11052_PI419772161	0.000702566	131.442	up	1700057G04Rik	NM_001033184	Mus musculus RIKEN cDNA 1700057G04 gene (1700057G04Rik), mRNA [NM_001033184]
CUST_11575_PI419772161	0.000237457	130.738	up	Pla2g10	NM_011987	Mus musculus phospholipase A2, group X (Pla2g10), mRNA [NM_011987]
CUST_18960_PI419772161	0.000184845	129.859	up	Gm5134	NM_198635	Mus musculus predicted gene 5134 (Gm5134), mRNA [NM_198635]
CUST_18834_PI419772161	4.0437e-05	129.516	up	Gm1027	NM_001126487	Mus musculus predicted gene 1027 (Gm1027), mRNA [NM_001126487]
CUST_9928_PI419772161	0.0138193	129.482	up	March10	NM_001039242	Mus musculus membrane-associated ring finger (C3HC4) 10 (March10), transcript variant 2, mRNA [NM_001039242]
CUST_11413_PI419772161	0.00699219	128.7	up	Lypd4	NM_182785	Mus musculus Ly6/Plaur domain containing 4 (Lypd4), mRNA [NM_182785]
CUST_14496_PI419772161	0.0101416	128.091	up	Lrrc43	NM_001033461	Mus musculus leucine rich repeat containing 43 (Lrrc43), mRNA [NM_001033461]
CUST_8322_PI419772161	0.00134517	127.614	up	Cage1	NM_027724	Mus musculus cancer antigen 1 (Cage1), mRNA [NM_027724]
CUST_12606_PI419772161	0.00672392	126.48	up	Slc13a5	NM_001004148	Mus musculus solute carrier family 13 (sodium-dependent citrate transporter), member 5 (Slc13a5), mRNA [NM_001004148]
CUST_13704_PI419772161	0.000195034	126.461	up	Arl2bp	NM_024269	Mus musculus ADP-ribosylation factor-like 2 binding protein (Arl2bp), transcript variant 2, mRNA [NM_024269]
CUST_17227_PI419772161	6.17734e-05	124.794	up	Gpr62	NM_001159652	Mus musculus G protein-coupled receptor 62 (Gpr62), mRNA [NM_001159652]
CUST_7177_PI419772161	0.0135508	124.781	up	Ccdc108	NM_001039495	Mus musculus coiled-coil domain containing 108 (Ccdc108), mRNA [NM_001039495]
CUST_2912_PI419772161	0.00392954	123.293	up	Olfr701	NM_028910	Mus musculus olfactory receptor 701 (Olfr701), mRNA [NM_028910]
CUST_18358_PI419772161	0.00380431	122.774	up	Sox5	NM_011444	Mus musculus SRY-box containing gene 5 (Sox5), transcript variant 1, mRNA [NM_011444]
CUST_11053_PI419772161	0.000354191	122.495	up	Spata9	NM_029343	Mus musculus spermatogenesis associated 9 (Spata9), mRNA [NM_029343]
CUST_19273_PI419772161	0.0090175	121.571	up	Gm6812	NM_001098842	Mus musculus predicted gene 6812 (Gm6812), mRNA [NM_001098842]
CUST_15392_PI419772161	0.00334376	121.502	up	4933411K16Rik	NM_025752	Mus musculus RIKEN cDNA 4933411K16 gene (4933411K16Rik), mRNA [NM_025752]
CUST_21389_PI419772161	0.00308015	121.354	up	Msr1	NM_001113326	macrophage scavenger receptor 1 isoform b
CUST_11997_PI419772161	0.00144633	119.728	up	Klk1b16	NM_008454	Mus musculus kallikrein 1-related peptidase b16 (Klk1b16), mRNA [NM_008454]
CUST_14933_PI419772161	2.42175e-05	119.506	up	Aqp8	NM_001109045	aquaporin 8 isoform 2
CUST_7493_PI419772161	0.000762982	119.288	up	Lrriq3	NM_028938	Mus musculus leucine-rich repeats and IQ motif containing 3 (Lrriq3), mRNA [NM_028938]
CUST_4393_PI419772161	0.000677918	119.225	up	4932425I24Rik	NM_001081025	Mus musculus RIKEN cDNA 4932425I24 gene (4932425I24Rik), mRNA [NM_001081025]
CUST_2897_PI419772161	0.00137422	118.454	up	4931409K22Rik	NM_177676	Mus musculus RIKEN cDNA 4931409K22 gene (4931409K22Rik), transcript variant 1, mRNA [NM_177676]
CUST_14949_PI419772161	0.000242075	117.847	up	Tssk4	NM_029596	testis-specific serine kinase 4 isoform 2
CUST_7030_PI419772161	0.00055438	116.657	up	Hspa1l	NM_013558	Mus musculus heat shock protein 1-like (Hspa1l), mRNA [NM_013558]
CUST_16142_PI419772161	0.00018922	116.068	up	Srgap1	NM_001081037	Mus musculus SLIT-ROBO Rho GTPase activating protein 1 (Srgap1), mRNA [NM_001081037]
CUST_7262_PI419772161	0.00923348	115.015	up	Caps2	NM_178278	Mus musculus calcyphosphine 2 (Caps2), mRNA [NM_178278]
CUST_6940_PI419772161	6.16409e-05	114.833	up	Tcte3	NM_198104	Mus musculus t-complex-associated testis expressed 3 (Tcte3), transcript variant 2, mRNA [NM_198104]
CUST_777_PI419772161	0.00349191	114.038	up	4930417G10Rik	NM_029107	Mus musculus RIKEN cDNA 4930417G10 gene (4930417G10Rik), mRNA [NM_029107]
CUST_20778_PI419772161	0.0103502	113.856	up	Galnt3	NM_015736	Mus musculus UDP-N-acetyl-alpha-D-galactosamine:polypeptide N-acetylgalactosaminyltransferase 3 (Galnt3), mRNA [NM_015736]
CUST_7354_PI419772161	0.00124041	113.811	up	Naif1	NM_194335	Mus musculus nuclear apoptosis inducing factor 1 (Naif1), mRNA [NM_194335]
CUST_9257_PI419772161	0.000950384	113.779	up	Cdkl4	NM_001033443	Mus musculus cyclin-dependent kinase-like 4 (Cdkl4), mRNA [NM_001033443]
CUST_7949_PI419772161	0.000688174	113.376	up	Csrnp3	NM_178634	cysteine-serine-rich nuclear protein 3
CUST_8951_PI419772161	0.000601797	112.118	up	Ppef1	NM_011147	Mus musculus protein phosphatase with EF hand calcium-binding domain 1 (Ppef1), mRNA [NM_011147]
CUST_18792_PI419772161	0.000260772	111.997	up	Gm3417	NM_001123368	t-complex-associated testis expressed 3-like
CUST_504_PI419772161	0.0147929	111.906	up	4930519G04Rik	NM_026263	Mus musculus RIKEN cDNA 4930519G04 gene (4930519G04Rik), mRNA [NM_026263]
CUST_7462_PI419772161	0.00655554	111.212	up	Dbil5	NM_021294	Mus musculus diazepam binding inhibitor-like 5 (Dbil5), mRNA [NM_021294]
CUST_13095_PI419772161	0.00553733	110.301	up	Dsg1a	NM_010079	Mus musculus desmoglein 1 alpha (Dsg1a), mRNA [NM_010079]
CUST_6700_PI419772161	0.00772459	110.074	up	Hdhd1a	NM_026108	Mus musculus haloacid dehalogenase-like hydrolase domain containing 1A (Hdhd1a), mRNA [NM_026108]
CUST_14714_PI419772161	0.00738058	109.608	up	Myl10	NM_001085387	myosin light chain 2, precursor
CUST_1108_PI419772161	0.00134035	109.395	up	Tmem202	NM_178388	Mus musculus transmembrane protein 202 (Tmem202), mRNA [NM_178388]
CUST_14824_PI419772161	1.72429e-05	109.335	up	Ggnbp1	NM_027544	Mus musculus gametogenetin binding protein 1 (Ggnbp1), mRNA [NM_027544]
CUST_9999_PI419772161	0.00366616	109.25	up	Mfsd6l	NM_146004	Mus musculus major facilitator superfamily domain containing 6-like (Mfsd6l), mRNA [NM_146004]
CUST_17554_PI419772161	0.000376559	108.293	up	Nme5	NM_080637	Mus musculus non-metastatic cells 5, protein expressed in (nucleoside-diphosphate kinase) (Nme5), mRNA [NM_080637]
CUST_15000_PI419772161	2.30129e-05	107.91	up	Tssk4	NM_027673	Mus musculus testis-specific serine kinase 4 (Tssk4), transcript variant 1, mRNA [NM_027673]
CUST_16217_PI419772161	0.0122268	107.879	up	Catsper1	NM_139301	Mus musculus cation channel, sperm associated 1 (Catsper1), mRNA [NM_139301]
CUST_18791_PI419772161	3.31837e-06	107.562	up	Gm3448	NM_001123367	t-complex-associated testis expressed 3-like
CUST_616_PI419772161	0.000234394	107.413	up	Ccdc87	NM_207268	Mus musculus coiled-coil domain containing 87 (Ccdc87), mRNA [NM_207268]
CUST_15414_PI419772161	0.0118278	107.358	up	Iqcf1	NM_001146701	IQ motif containing F1 isoform 2
CUST_9494_PI419772161	0.00292505	107.285	up	Isg20	NM_020583	Mus musculus interferon-stimulated protein (Isg20), transcript variant 1, mRNA [NM_020583]
CUST_10933_PI419772161	0.00561475	106.273	up	Capn11	NM_001013767	Mus musculus calpain 11 (Capn11), mRNA [NM_001013767]
CUST_4459_PI419772161	0.00160436	106.171	up	Afm	NM_145146	Mus musculus afamin (Afm), mRNA [NM_145146]
CUST_19178_PI419772161	0.00213089	105.407	up	Gm4884	NM_183166	Mus musculus predicted gene 4884 (Gm4884), mRNA [NM_183166]
CUST_16171_PI419772161	0.000513234	104.827	up	Slc2a5	NM_019741	Mus musculus solute carrier family 2 (facilitated glucose transporter), member 5 (Slc2a5), mRNA [NM_019741]
CUST_16012_PI419772161	0.00626333	104.482	up	Rfx6	NM_177306	Mus musculus regulatory factor X, 6 (Rfx6), transcript variant 2, mRNA [NM_177306]
CUST_8890_PI419772161	0.00621446	103.693	up	Fam135b	NM_177819	Mus musculus family with sequence similarity 135, member B (Fam135b), mRNA [NM_177819]
CUST_17166_PI419772161	0.00243559	103.655	up	Slc17a6	NM_080853	Mus musculus solute carrier family 17 (sodium-dependent inorganic phosphate cotransporter), member 6 (Slc17a6), mRNA [NM_080853]
CUST_7019_PI419772161	0.00052647	103.622	up	4930526D03Rik	NM_199023	Mus musculus RIKEN cDNA 4930526D03 gene (4930526D03Rik), mRNA [NM_199023]
CUST_607_PI419772161	0.0019167	103.575	up	2210404O07Rik	NM_001099917	Mus musculus RIKEN cDNA 2210404O07 gene (2210404O07Rik), mRNA [NM_001099917]
CUST_22253_PI419772161	0.00273042	102.861	up	4932438H23Rik	NM_028905	Mus musculus RIKEN cDNA 4932438H23 gene (4932438H23Rik), transcript variant 1, mRNA [NM_028905]
CUST_19059_PI419772161	0.00129849	102.857	up	Gm5935	NM_001081657	hypothetical protein LOC546282
CUST_7389_PI419772161	0.000941807	102.618	up	Odf3l1	NM_198673	Mus musculus outer dense fiber of sperm tails 3-like 1 (Odf3l1), mRNA [NM_198673]
CUST_16254_PI419772161	0.00105965	102.569	up	Mgat5	NM_145128	Mus musculus mannoside acetylglucosaminyltransferase 5 (Mgat5), mRNA [NM_145128]
CUST_1147_PI419772161	0.000400646	102.042	up	Slc36a3	NM_172258	Mus musculus solute carrier family 36 (proton/amino acid symporter), member 3 (Slc36a3), mRNA [NM_172258]
CUST_15416_PI419772161	0.000230251	101.796	up	Ptchd3	NM_029049	Mus musculus patched domain containing 3 (Ptchd3), mRNA [NM_029049]
CUST_15401_PI419772161	0.00042321	101.506	up	Ccdc89	NM_027298	Mus musculus coiled-coil domain containing 89 (Ccdc89), mRNA [NM_027298]
CUST_4412_PI419772161	0.000453898	101.323	up	Actrt1	NM_028514	Mus musculus actin-related protein T1 (Actrt1), mRNA [NM_028514]
CUST_14691_PI419772161	0.000599126	100.323	up	1700102P08Rik	NM_053216	Mus musculus RIKEN cDNA 1700102P08 gene (1700102P08Rik), mRNA [NM_053216]
CUST_7868_PI419772161	0.00405056	100	up	1700081D17Rik	NM_028526	hypothetical protein LOC73523 isoform b
CUST_8091_PI419772161	0.00195161	99.6075	up	Vmn2r123	NM_009485	vomeronasal 2, receptor 123
CUST_7948_PI419772161	0.000885236	99.2199	up	Csrnp3	NM_153409	Mus musculus cysteine-serine-rich nuclear protein 3 (Csrnp3), transcript variant 1, mRNA [NM_153409]
CUST_13395_PI419772161	0.0029966	98.7902	up	Cox8c	NM_001039049	Mus musculus cytochrome c oxidase, subunit VIIIc (Cox8c), nuclear gene encoding mitochondrial protein, mRNA [NM_001039049]
CUST_12250_PI419772161	0.00284624	98.5566	up	Ggn	NM_182696	Mus musculus gametogenetin (Ggn), transcript variant 3, mRNA [NM_182696]
CUST_8106_PI419772161	0.0039743	97.5526	up	Ssxb2	NM_001134226	synovial sarcoma, X member B, breakpoint 2
CUST_12598_PI419772161	0.000243648	97.2027	up	Lrrc27	NM_027164	Mus musculus leucine rich repeat containing 27 (Lrrc27), transcript variant 1, mRNA [NM_027164]
CUST_1055_PI419772161	0.00075925	96.6004	up	Ttc30a2	NM_001081228	tetratricopeptide repeat domain 30A2
CUST_7183_PI419772161	2.63671e-05	96.2357	up	Insl6	NM_013754	Mus musculus insulin-like 6 (Insl6), mRNA [NM_013754]
CUST_4670_PI419772161	0.000746527	94.8529	up	Trpd52l3	NM_025741	Mus musculus tumor protein D52-like 3 (Trpd52l3), mRNA [NM_025741]
CUST_19058_PI419772161	0.0077864	94.5828	up	Gm15104	NM_001101501	hypothetical protein LOC333588
CUST_13820_PI419772161	0.00513419	94.2265	up	Fgf14	NM_207667	Mus musculus fibroblast growth factor 14 (Fgf14), transcript variant 2, mRNA [NM_207667]
CUST_8528_PI419772161	0.00160721	94.1161	up	Dnajb13	NM_153527	Mus musculus DnaJ (Hsp40) related, subfamily B, member 13 (Dnajb13), mRNA [NM_153527]
CUST_4326_PI419772161	0.000248587	93.9001	up	Tmem232	NM_001008973	Mus musculus transmembrane protein 232 (Tmem232), mRNA [NM_001008973]
CUST_1651_PI419772161	0.00340852	93.844	up	Speer4d	NM_025759	Mus musculus spermatogenesis associated glutamate (E)-rich protein 4d (Speer4d), mRNA [NM_025759]
CUST_2381_PI419772161	0.000297193	93.2318	up	Cyp4f39	NM_177307	Mus musculus cytochrome P450, family 4, subfamily f, polypeptide 39 (Cyp4f39), mRNA [NM_177307]
CUST_12814_PI419772161	0.000278941	93.1504	up	Cpeb2	NM_175937	Mus musculus cytoplasmic polyadenylation element binding protein 2 (Cpeb2), transcript variant 1, mRNA [NM_175937]
CUST_12066_PI419772161	0.00080877	92.9856	up	Iqcd	NM_029408	Mus musculus IQ motif containing D (Iqcd), mRNA [NM_029408]
CUST_10955_PI419772161	0.000121312	92.8076	up	Spaca1	NM_026293	Mus musculus sperm acrosome associated 1 (Spaca1), mRNA [NM_026293]
CUST_5294_PI419772161	0.00120125	92.7878	up	Vmn2r89	NM_009487	vomeronasal 2, receptor 89 isoform 2
CUST_1344_PI419772161	7.79491e-05	91.9079	up	Ttc29	NM_183096	Mus musculus tetratricopeptide repeat domain 29 (Ttc29), mRNA [NM_183096]
CUST_19208_PI419772161	0.000492908	91.7125	up	Gm13298	NM_001085530	hypothetical protein LOC545611
CUST_422_PI419772161	9.1904e-05	91.6293	up	1700041C02Rik	NM_029286	hypothetical protein LOC73332
CUST_11214_PI419772161	0.023224	90.8988	up	Asb17	NM_025758	Mus musculus ankyrin repeat and SOCS box-containing 17 (Asb17), mRNA [NM_025758]
CUST_16372_PI419772161	0.011711	90.7569	up	9230104L09Rik	NM_029960	Mus musculus RIKEN cDNA 9230104L09 gene (9230104L09Rik), mRNA [NM_029960]
CUST_9694_PI419772161	0.000615635	90.3238	up	Dpysl3	NM_001136086	dihydropyrimidinase-like 3 isoform 1
CUST_1001_PI419772161	0.00102808	90.162	up	Poteg	NM_026256	Mus musculus POTE ankyrin domain family, member G (Poteg), transcript variant 1, mRNA [NM_026256]
CUST_8180_PI419772161	0.000396542	89.9805	up	Pkdrej	NM_011105	Mus musculus polycystic kidney disease (polycystin) and REJ (sperm receptor for egg jelly, sea urchin homolog)-like (Pkdrej), mRNA [NM_011105]
CUST_9474_PI419772161	0.00310454	89.3511	up	Klk1b5	NM_008456	kallikrein 1-related peptidase b5
CUST_8433_PI419772161	0.00932685	88.6996	up	4933405L10Rik	NM_027655	Mus musculus RIKEN cDNA 4933405L10 gene (4933405L10Rik), mRNA [NM_027655]
CUST_9889_PI419772161	2.4177e-05	87.8649	up	Aif1	NM_019467	Mus musculus allograft inflammatory factor 1 (Aif1), mRNA [NM_019467]
CUST_13993_PI419772161	0.00015333	87.8627	up	Rfx8	NM_001145660	Mus musculus regulatory factor X 8 (Rfx8), mRNA [NM_001145660]
CUST_19592_PI419772161	6.84558e-05	87.1085	up	Rdx	NM_001104617	radixin isoform b
CUST_17642_PI419772161	0.00687039	86.2129	up	Adcy10	NM_173029	Mus musculus adenylate cyclase 10 (Adcy10), mRNA [NM_173029]
CUST_1966_PI419772161	0.0104037	85.9184	up	Gpr158	NM_001004761	Mus musculus G protein-coupled receptor 158 (Gpr158), mRNA [NM_001004761]
CUST_6269_PI419772161	0.00568	85.6024	up	Gzmn	NM_153052	Mus musculus granzyme N (Gzmn), mRNA [NM_153052]
CUST_15384_PI419772161	0.00125166	85.2658	up	Glipr1l2	NM_026223	Mus musculus GLI pathogenesis-related 1 like 2 (Glipr1l2), mRNA [NM_026223]
CUST_1821_PI419772161	0.00022033	85.2401	up	2610034M16Rik	NM_027001	Mus musculus RIKEN cDNA 2610034M16 gene (2610034M16Rik), mRNA [NM_027001]
CUST_7200_PI419772161	0.000440574	85.0339	up	Hydin	NM_172916	Mus musculus hydrocephalus inducing (Hydin), mRNA [NM_172916]
CUST_13364_PI419772161	0.00333262	84.9025	up	Ckmt2	NM_198415	Mus musculus creatine kinase, mitochondrial 2 (Ckmt2), nuclear gene encoding mitochondrial protein, mRNA [NM_198415]
CUST_187_PI419772161	0.000116139	84.7866	up	Ccdc11	NM_028948	Mus musculus coiled-coil domain containing 11 (Ccdc11), transcript variant 1, mRNA [NM_028948]
CUST_16070_PI419772161	0.00662713	84.7341	up	Rp1	NM_011283	Mus musculus retinitis pigmentosa 1 (human) (Rp1), mRNA [NM_011283]
CUST_18320_PI419772161	9.14929e-05	84.5099	up	1190002A17Rik	NM_001033874	Mus musculus RIKEN cDNA 1190002A17 gene (1190002A17Rik), mRNA [NM_001033874]
CUST_1567_PI419772161	0.0137393	84.1338	up	Amac1	NM_019871	Mus musculus acyl-malonyl condensing enzyme 1 (Amac1), mRNA [NM_019871]
CUST_7170_PI419772161	0.000601522	83.3971	up	Lrrc6	NM_019457	Mus musculus leucine rich repeat containing 6 (testis) (Lrrc6), mRNA [NM_019457]
CUST_3527_PI419772161	0.00101465	83.191	up	Ctnna3	NM_177612	Mus musculus catenin (cadherin associated protein), alpha 3 (Ctnna3), transcript variant 2, mRNA [NM_177612]
CUST_3909_PI419772161	0.00239012	82.9792	up	BC089491	NM_175033	Mus musculus cDNA sequence BC089491 (BC089491), mRNA [NM_175033]
CUST_20701_PI419772161	0.00029208	82.8505	up	Slc1a2	NM_011393	Mus musculus solute carrier family 1 (glial high affinity glutamate transporter), member 2 (Slc1a2), transcript variant 3, mRNA [NM_011393]
CUST_4152_PI419772161	0.000231229	82.8168	up	Rnf139	NM_175226	Mus musculus ring finger protein 139 (Rnf139), mRNA [NM_175226]
CUST_6024_PI419772161	0.00995321	82.7382	up	Agbl3	NM_178630	Mus musculus ATP/GTP binding protein-like 3 (Agbl3), mRNA [NM_178630]
CUST_7211_PI419772161	8.92725e-05	82.7373	up	Tmc1	NM_028953	transmembrane channel-like gene family 1
CUST_13225_PI419772161	0.000772704	82.0358	up	Fa2h	NM_178086	Mus musculus fatty acid 2-hydroxylase (Fa2h), mRNA [NM_178086]
CUST_17910_PI419772161	0.00250536	82.0305	up	Klk1	NM_010639	Mus musculus kallikrein 1 (Klk1), mRNA [NM_010639]
CUST_9496_PI419772161	0.000294455	81.9726	up	Isg20	NM_001113527	interferon stimulated exonuclease
CUST_12681_PI419772161	6.59681e-05	81.7002	up	Mycbpap	NM_170671	Mus musculus MYCBP associated protein (Mycbpap), mRNA [NM_170671]
CUST_2206_PI419772161	0.00378627	81.466	up	Ttll13	NM_177765	Mus musculus tubulin tyrosine ligase-like family, member 13 (Ttll13), mRNA [NM_177765]
CUST_13385_PI419772161	0.00129989	80.45	up	4933412E24Rik	NM_027668	Mus musculus RIKEN cDNA 4933412E24 gene (4933412E24Rik), mRNA [NM_027668]
CUST_1417_PI419772161	0.00393469	80.4455	up	Zan	NM_011741	Mus musculus zonadhesin (Zan), mRNA [NM_011741]
CUST_8904_PI419772161	0.000231925	80.4087	up	C2cd4b	NM_001081314	Mus musculus C2 calcium-dependent domain containing 4B (C2cd4b), mRNA [NM_001081314]
CUST_18951_PI419772161	8.78347e-05	79.4749	up	Gm4984	NM_001101484	hypothetical protein LOC245347
CUST_389_PI419772161	0.00617555	79.4593	up	A630095E13Rik	NM_001033325	Mus musculus RIKEN cDNA A630095E13 gene (A630095E13Rik), mRNA [NM_001033325]
CUST_7151_PI419772161	0.000248041	79.4296	up	Ccdc113	NM_172914	Mus musculus coiled-coil domain containing 113 (Ccdc113), mRNA [NM_172914]
CUST_1356_PI419772161	0.0481752	78.8364	up	Lyzl4	NM_026915	Mus musculus lysozyme-like 4 (Lyzl4), mRNA [NM_026915]
CUST_3654_PI419772161	0.00449636	78.7569	up	Antxrl	NM_172808	Mus musculus anthrax toxin receptor-like (Antxrl), mRNA [NM_172808]
CUST_18767_PI419772161	0.000638307	78.6889	up	Gm2012	NM_001104946	hypothetical protein LOC100039030
CUST_18797_PI419772161	0.000612881	78.6206	up	Gm1060	NM_001033460	Mus musculus predicted gene 1060 (Gm1060), mRNA [NM_001033460]
CUST_11276_PI419772161	0.000511197	78.562	up	Cpa5	NM_144537	Mus musculus carboxypeptidase A5 (Cpa5), mRNA [NM_144537]
CUST_22304_PI419772161	0.00153373	78.4469	up	BC051142	NM_001001177	Mus musculus cDNA sequence BC051142 (BC051142), transcript variant 1, mRNA [NM_001001177]
CUST_519_PI419772161	2.4762e-05	78.3859	up	4931417G12Rik	NM_027633	Mus musculus RIKEN cDNA 4931417G12 gene (4931417G12Rik), mRNA [NM_027633]
CUST_14528_PI419772161	0.000198153	78.0862	up	Zmynd12	NM_001014900	Mus musculus zinc finger, MYND domain containing 12 (Zmynd12), mRNA [NM_001014900]
CUST_8068_PI419772161	4.24661e-05	77.8847	up	Cdhr4	NM_001122635	Mus musculus cadherin-related family member 4 (Cdhr4), mRNA [NM_001122635]
CUST_8112_PI419772161	0.00219354	77.869	up	4930404A10Rik	NM_029105	Mus musculus RIKEN cDNA 4930404A10 gene (4930404A10Rik), mRNA [NM_029105]
CUST_7712_PI419772161	0.00146883	77.8186	up	Speer4e	NM_001122661	spermatogenesis associated glutamate (E)-rich
CUST_12890_PI419772161	0.00201649	77.6169	up	Dsg1c	NM_181680	desmoglein 1 gamma
CUST_15718_PI419772161	0.00151509	77.1756	up	Hist1h1t	NM_010377	Mus musculus histone cluster 1, H1t (Hist1h1t), mRNA [NM_010377]
CUST_1480_PI419772161	0.00295824	77.092	up	Vmn2r89	NM_009486	Mus musculus vomeronasal 2, receptor 89 (Vmn2r89), transcript variant 1, mRNA [NM_009486]
CUST_10098_PI419772161	0.000192363	76.6247	up	Odf2	NM_013615	Mus musculus outer dense fiber of sperm tails 2 (Odf2), transcript variant 3, mRNA [NM_013615]
CUST_11542_PI419772161	0.000274342	76.4304	up	Efcab1	NM_025769	Mus musculus EF hand calcium binding domain 1 (Efcab1), mRNA [NM_025769]
CUST_480_PI419772161	0.0114058	76.1979	up	1700019M22Rik	NM_027076	Mus musculus RIKEN cDNA 1700019M22 gene (1700019M22Rik), mRNA [NM_027076]
CUST_258_PI419772161	0.00129096	76.179	up	4930430D24Rik	NM_001034856	hypothetical protein LOC194735
CUST_6760_PI419772161	0.000188151	75.7763	up	Mical3	NM_153396	Mus musculus microtubule associated monoxygenase, calponin and LIM domain containing 3 (Mical3), mRNA [NM_153396]
CUST_15868_PI419772161	0.00216243	74.945	up	Atp1a4	NM_013734	Mus musculus ATPase, Na+/K+ transporting, alpha 4 polypeptide (Atp1a4), mRNA [NM_013734]
CUST_18851_PI419772161	0.000850304	74.8301	up	Gm6121	NM_001114754	hypothetical protein LOC619991
CUST_18406_PI419772161	0.00170309	74.8216	up	Hoxa4	NM_008265	Mus musculus homeobox A4 (Hoxa4), mRNA [NM_008265]
CUST_7394_PI419772161	1.75492e-05	74.1392	up	Atxn7l1	NM_001033436	Mus musculus ataxin 7-like 1 (Atxn7l1), transcript variant 1, mRNA [NM_001033436]
CUST_3925_PI419772161	0.01979	74.0153	up	Prss43	NM_199471	Mus musculus protease, serine, 43 (Prss43), mRNA [NM_199471]
CUST_9894_PI419772161	0.00497765	74.0128	up	Efcab5	NM_176965	Mus musculus EF-hand calcium binding domain 5 (Efcab5), mRNA [NM_176965]
CUST_2373_PI419772161	0.0112163	73.9817	up	Gykl1	NM_010293	Mus musculus glycerol kinase-like 1 (Gykl1), mRNA [NM_010293]
CUST_3567_PI419772161	0.000118561	73.7269	up	Zmynd15	NM_001029929	Mus musculus zinc finger, MYND-type containing 15 (Zmynd15), mRNA [NM_001029929]
CUST_6397_PI419772161	0.00723506	73.6192	up	Wbscr28	NM_194065	Mus musculus Williams-Beuren syndrome chromosome region 28 (human) (Wbscr28), transcript variant 1, mRNA [NM_194065]
CUST_10159_PI419772161	0.00050548	73.2005	up	Lrrc9	NM_030070	Mus musculus leucine rich repeat containing 9 (Lrrc9), transcript variant 2, mRNA [NM_030070]
CUST_801_PI419772161	8.2431e-06	72.7707	up	1700029I15Rik	NM_183112	Mus musculus RIKEN cDNA 1700029I15 gene (1700029I15Rik), mRNA [NM_183112]
CUST_16537_PI419772161	0.000494193	72.758	up	Adc	NM_172875	Mus musculus arginine decarboxylase (Adc), mRNA [NM_172875]
CUST_2813_PI419772161	0.000388181	72.4827	up	Ropn1l	NM_145852	Mus musculus ropporin 1-like (Ropn1l), mRNA [NM_145852]
CUST_16850_PI419772161	0.00377214	72.1862	up	Pde1c	NM_001025568	Mus musculus phosphodiesterase 1C (Pde1c), transcript variant 2, mRNA [NM_001025568]
CUST_19054_PI419772161	0.00503233	72.1634	up	Gm4763	NM_177593	Mus musculus predicted gene 4763 (Gm4763), mRNA [NM_177593]
CUST_13954_PI419772161	5.8417e-05	72.1494	up	Prok2	NM_015768	Mus musculus prokineticin 2 (Prok2), transcript variant 1, mRNA [NM_015768]
CUST_764_PI419772161	0.000552062	71.7699	up	2900006K08Rik	NM_028377	Mus musculus RIKEN cDNA 2900006K08 gene (2900006K08Rik), mRNA [NM_028377]
CUST_90_PI419772161	0.0026164	71.646	up	BC027072	NM_146082	Mus musculus cDNA sequence BC027072 (BC027072), mRNA [NM_146082]
CUST_9221_PI419772161	0.0108666	70.9221	up	4932411E22Rik	NM_172534	Mus musculus RIKEN cDNA 4932411E22 gene (4932411E22Rik), mRNA [NM_172534]
CUST_9660_PI419772161	5.57381e-05	70.5782	up	Fam20a	NM_153782	Mus musculus family with sequence similarity 20, member A (Fam20a), mRNA [NM_153782]
CUST_11279_PI419772161	0.000630966	70.2845	up	Cetn4	NM_145825	Mus musculus centrin 4 (Cetn4), mRNA [NM_145825]
CUST_10099_PI419772161	0.00105039	70.1186	up	Odf2	NM_001113214	outer dense fiber of sperm tails 2 isoform b
CUST_20925_PI419772161	0.00114036	70.0598	up	Best1	NM_011913	Mus musculus bestrophin 1 (Best1), mRNA [NM_011913]
CUST_10160_PI419772161	0.0428841	69.4618	up	Lrrc9	NM_001142728	leucine rich repeat containing 9 isoform 1
CUST_4582_PI419772161	0.0021559	69.42	up	Aox3	NM_023617	Mus musculus aldehyde oxidase 3 (Aox3), mRNA [NM_023617]
CUST_7_PI419772161	0.0102814	69.1737	up	4930524B15Rik	NM_026262	Mus musculus RIKEN cDNA 4930524B15 gene (4930524B15Rik), mRNA [NM_026262]
CUST_17122_PI419772161	0.000103702	69.0571	up	Piwil1	NM_021311	Mus musculus piwi-like homolog 1 (Drosophila) (Piwil1), mRNA [NM_021311]
CUST_8448_PI419772161	2.51635e-06	69.0477	up	Dnahc8	NM_013811	Mus musculus dynein, axonemal, heavy chain 8 (Dnahc8), mRNA [NM_013811]
CUST_8514_PI419772161	0.00108176	68.5554	up	Ybx2	NM_016875	Mus musculus Y box protein 2 (Ybx2), mRNA [NM_016875]
CUST_1039_PI419772161	0.00158816	68.5488	up	4931406B18Rik	NM_028737	Mus musculus RIKEN cDNA 4931406B18 gene (4931406B18Rik), mRNA [NM_028737]
CUST_22439_PI419772161	0.000396936	68.5347	up	Gm4836	NM_009529	Mus musculus predicted gene 4836 (Gm4836), mRNA [NM_009529]
CUST_13231_PI419772161	0.00126232	68.3756	up	Adam1a	NM_172126	Mus musculus a disintegrin and metallopeptidase domain 1a (Adam1a), mRNA [NM_172126]
CUST_19222_PI419772161	0.000267625	68.2655	up	Gm10147	NM_001099919	hypothetical protein LOC100039324
CUST_8480_PI419772161	0.00185251	67.7074	up	Ggn	NM_182694	gametogenetin isoform 1
CUST_21753_PI419772161	2.23475e-06	67.6799	up	Gsg2	NM_010353	Mus musculus germ cell-specific gene 2 (Gsg2), mRNA [NM_010353]
CUST_12930_PI419772161	0.00413097	67.4086	up	Nmur1	NM_010341	Mus musculus neuromedin U receptor 1 (Nmur1), mRNA [NM_010341]
CUST_727_PI419772161	0.000279986	67.1706	up	BC049635	NM_177785	Mus musculus cDNA sequence BC049635 (BC049635), mRNA [NM_177785]
CUST_11695_PI419772161	0.00289863	66.9494	up	Tsga10	NM_207228	testis specific 10
CUST_1025_PI419772161	0.000103624	66.7832	up	1700011F03Rik	NM_028825	Mus musculus RIKEN cDNA 1700011F03 gene (1700011F03Rik), mRNA [NM_028825]
CUST_16241_PI419772161	0.00813039	66.7478	up	Fhl4	NM_010214	Mus musculus four and a half LIM domains 4 (Fhl4), mRNA [NM_010214]
CUST_20570_PI419772161	0.00263527	66.7469	up	Acr	NM_013455	Mus musculus acrosin prepropeptide (Acr), mRNA [NM_013455]
CUST_16761_PI419772161	0.00182677	66.6791	up	Spaca4	NM_027055	Mus musculus sperm acrosome associated 4 (Spaca4), mRNA [NM_027055]
CUST_19077_PI419772161	5.28585e-05	66.5684	up	Gm14632	NM_001100610	hypothetical protein LOC100042144
CUST_18993_PI419772161	6.40776e-05	66.5315	up	Gm10058	NM_001109969	Xlr-related, meiosis regulated-like
CUST_15455_PI419772161	0.000423075	66.4318	up	Dnajb3	NM_008299	Mus musculus DnaJ (Hsp40) homolog, subfamily B, member 3 (Dnajb3), mRNA [NM_008299]
CUST_8678_PI419772161	0.00863846	66.2564	up	Pkd1l3	NM_181544	Mus musculus polycystic kidney disease 1 like 3 (Pkd1l3), transcript variant 2, mRNA [NM_181544]
CUST_296_PI419772161	7.81076e-05	66.2072	up	2210415F13Rik	NM_027339	Mus musculus RIKEN cDNA 2210415F13 gene (2210415F13Rik), transcript variant 2, mRNA [NM_027339]
CUST_4319_PI419772161	0.000757834	66.1149	up	Lrrc29	NM_177449	Mus musculus leucine rich repeat containing 29 (Lrrc29), mRNA [NM_177449]
CUST_9777_PI419772161	0.000195932	65.9905	up	Slx	NM_001136476	Sycp3 like X-linked
CUST_19250_PI419772161	0.0130185	65.8626	up	Gm5567	NM_001004182	hypothetical protein LOC434008
CUST_13894_PI419772161	0.000843226	65.8262	up	Prok2	NM_001037539	prokineticin 2 isoform 2
CUST_19127_PI419772161	0.000161666	65.6387	up	Gm10096	NM_001102678	hypothetical protein LOC100039377
CUST_11495_PI419772161	0.00237795	65.626	up	2810408A11Rik	NM_027419	Mus musculus RIKEN cDNA 2810408A11 gene (2810408A11Rik), mRNA [NM_027419]
CUST_18958_PI419772161	0.000367563	65.5695	up	Gm10487	NM_001100609	hypothetical protein LOC100039467
CUST_19391_PI419772161	0.000896634	65.4911	up	Ano2	NM_153589	Mus musculus anoctamin 2 (Ano2), mRNA [NM_153589]
CUST_19020_PI419772161	0.000955836	65.2438	up	Gm12581	NM_001085535	hypothetical protein LOC546519
CUST_7180_PI419772161	0.00218348	65.1009	up	Meig1	NM_008579	Mus musculus meiosis expressed gene 1 (Meig1), mRNA [NM_008579]
CUST_7276_PI419772161	0.000129749	65.0333	up	Clip4	NM_175378	CAP-GLY domain containing linker protein family,
CUST_4395_PI419772161	1.95033e-05	64.5596	up	Creb3l4	NM_030080	Mus musculus cAMP responsive element binding protein 3-like 4 (Creb3l4), mRNA [NM_030080]
CUST_18112_PI419772161	0.00304511	64.3854	up	4933406M09Rik	NM_173771	Mus musculus RIKEN cDNA 4933406M09 gene (4933406M09Rik), mRNA [NM_173771]
CUST_19158_PI419772161	0.00448386	64.3595	up	Gm5584	NM_001101534	Mus musculus predicted gene 5584 (Gm5584), mRNA [NM_001101534]
CUST_1010_PI419772161	0.000165371	64.2537	up	LOC100039550	NM_001109970	Xlr-related, meiosis regulated Xmr
CUST_9714_PI419772161	0.000443077	64.2336	up	2310033E01Rik	NM_001037143	Mus musculus RIKEN cDNA 2310033E01 gene (2310033E01Rik), mRNA [NM_001037143]
CUST_7120_PI419772161	0.000383497	64.1119	up	Gdpd4	NM_177696	Mus musculus glycerophosphodiester phosphodiesterase domain containing 4 (Gdpd4), mRNA [NM_177696]
CUST_19030_PI419772161	0.0127415	64.0131	up	Gm4906	NM_001114529	hypothetical protein LOC236663
CUST_814_PI419772161	8.59468e-05	63.3102	up	6430531B16Rik	NM_001033465	hypothetical protein LOC381933
CUST_13819_PI419772161	0.0101973	63.298	up	Fgf14	NM_010201	Mus musculus fibroblast growth factor 14 (Fgf14), transcript variant 1, mRNA [NM_010201]
CUST_14358_PI419772161	0.00262121	63.0766	up	Ttc21a	NM_028735	Mus musculus tetratricopeptide repeat domain 21A (Ttc21a), mRNA [NM_028735]
CUST_14997_PI419772161	1.25933e-05	61.8569	up	1700029P11Rik	NM_025503	Mus musculus RIKEN cDNA 1700029P11 gene (1700029P11Rik), mRNA [NM_025503]
CUST_4932_PI419772161	1.03379e-05	61.8299	up	Ly6g6c	NM_023463	Mus musculus lymphocyte antigen 6 complex, locus G6C (Ly6g6c), mRNA [NM_023463]
CUST_19131_PI419772161	0.000740935	61.7751	up	Gm12695	NM_001081284	predicted gene 12695
CUST_10102_PI419772161	0.000859059	61.4328	up	1700009P17Rik	NM_001081275	Mus musculus RIKEN cDNA 1700009P17 gene (1700009P17Rik), mRNA [NM_001081275]
CUST_3243_PI419772161	0.000278938	60.9942	up	Casc1	NM_177222	Mus musculus cancer susceptibility candidate 1 (Casc1), mRNA [NM_177222]
CUST_5583_PI419772161	0.00331907	60.7884	up	Adad1	NM_009350	adenosine deaminase domain containing 1 (testis
CUST_22089_PI419772161	0.00897735	60.6924	up	Npas1	NM_008718	Mus musculus neuronal PAS domain protein 1 (Npas1), mRNA [NM_008718]
CUST_410_PI419772161	0.000540179	60.6244	up	2210415F13Rik	NM_001083884	RIKEN cDNA 2210415F13
CUST_18132_PI419772161	0.0154962	60.5798	up	Hsd3b6	NM_013821	Mus musculus hydroxy-delta-5-steroid dehydrogenase, 3 beta- and steroid delta-isomerase 6 (Hsd3b6), mRNA [NM_013821]
CUST_7010_PI419772161	3.86947e-05	60.4516	up	Ankrd55	NM_029898	Mus musculus ankyrin repeat domain 55 (Ankrd55), transcript variant 1, mRNA [NM_029898]
CUST_20882_PI419772161	0.0100896	60.3676	up	Mpo	NM_010824	Mus musculus myeloperoxidase (Mpo), nuclear gene encoding mitochondrial protein, mRNA [NM_010824]
CUST_12656_PI419772161	0.0376721	60.1441	up	Ntm	NM_172290	Mus musculus neurotrimin (Ntm), mRNA [NM_172290]
CUST_21270_PI419772161	0.00345108	60.0105	up	Neurog1	NM_010896	Mus musculus neurogenin 1 (Neurog1), mRNA [NM_010896]
CUST_5679_PI419772161	0.000633304	59.9761	up	Hapln2	NM_022031	Mus musculus hyaluronan and proteoglycan link protein 2 (Hapln2), mRNA [NM_022031]
CUST_12444_PI419772161	0.015978	59.7925	up	Alx1	NM_172553	Mus musculus ALX homeobox 1 (Alx1), mRNA [NM_172553]
CUST_16691_PI419772161	0.0123384	59.5061	up	Clec4g	NM_029465	Mus musculus C-type lectin domain family 4, member g (Clec4g), mRNA [NM_029465]
CUST_381_PI419772161	0.00267296	59.2134	up	4930504O13Rik	NM_207527	Mus musculus RIKEN cDNA 4930504O13 gene (4930504O13Rik), mRNA [NM_207527]
CUST_16276_PI419772161	0.00301646	59.21	up	Dnaic1	NM_175138	Mus musculus dynein, axonemal, intermediate chain 1 (Dnaic1), mRNA [NM_175138]
CUST_2257_PI419772161	0.000832707	58.7025	up	BC048507	NM_001001185	Mus musculus cDNA sequence BC048507 (BC048507), mRNA [NM_001001185]
CUST_4702_PI419772161	7.00735e-05	58.5256	up	Dnajc5g	NM_177677	Mus musculus DnaJ (Hsp40) homolog, subfamily C, member 5 gamma (Dnajc5g), mRNA [NM_177677]
CUST_1006_PI419772161	0.0056539	58.4097	up	Vmn2r121	NM_001100616	vomeronasal 2, receptor 121
CUST_18736_PI419772161	0.000276599	58.398	up	Gm128	NM_001024841	Mus musculus predicted gene 128 (Gm128), mRNA [NM_001024841]
CUST_11178_PI419772161	0.0075761	58.3487	up	Morn5	NM_029309	Mus musculus MORN repeat containing 5 (Morn5), mRNA [NM_029309]
CUST_12040_PI419772161	0.00314246	58.3191	up	Serpinb9e	NM_011456	Mus musculus serine (or cysteine) peptidase inhibitor, clade B, member 9e (Serpinb9e), mRNA [NM_011456]
CUST_1185_PI419772161	0.000846045	57.8626	up	Wbp2nl	NM_029066	Mus musculus WBP2 N-terminal like (Wbp2nl), mRNA [NM_029066]
CUST_96_PI419772161	0.00320939	57.7274	up	2610318N02Rik	NM_183287	Mus musculus RIKEN cDNA 2610318N02 gene (2610318N02Rik), mRNA [NM_183287]
CUST_10158_PI419772161	0.00294441	57.6961	up	Spdya	NM_001142631	Mus musculus speedy homolog A (Xenopus laevis) (Spdya), transcript variant 2, mRNA [NM_001142631]
CUST_20261_PI419772161	0.000862851	57.5557	up	Ttll10	NM_029264	Mus musculus tubulin tyrosine ligase-like family, member 10 (Ttll10), mRNA [NM_029264]
CUST_9283_PI419772161	0.00683254	57.523	up	Hsd17b2	NM_008290	Mus musculus hydroxysteroid (17-beta) dehydrogenase 2 (Hsd17b2), mRNA [NM_008290]
CUST_7210_PI419772161	3.21065e-05	57.346	up	Ccdc39	NM_026222	Mus musculus coiled-coil domain containing 39 (Ccdc39), mRNA [NM_026222]
CUST_270_PI419772161	0.000237812	57.2802	up	4921536K21Rik	NM_026150	Mus musculus RIKEN cDNA 4921536K21 gene (4921536K21Rik), mRNA [NM_026150]
CUST_601_PI419772161	0.0113054	56.7154	up	4933402N03Rik	NM_173409	Mus musculus RIKEN cDNA 4933402N03 gene (4933402N03Rik), mRNA [NM_173409]
CUST_7196_PI419772161	0.000317198	56.7089	up	Dydc2	NM_027717	DPY30 domain containing 2
CUST_11804_PI419772161	0.00490893	56.5485	up	Epsti1	NM_178825	Mus musculus epithelial stromal interaction 1 (breast) (Epsti1), transcript variant b, mRNA [NM_178825]
CUST_5281_PI419772161	0.000488483	56.3055	up	Prss44	NM_148940	Mus musculus protease, serine, 44 (Prss44), mRNA [NM_148940]
CUST_12299_PI419772161	0.00155954	56.1085	up	Chgb	NM_007694	Mus musculus chromogranin B (Chgb), mRNA [NM_007694]
CUST_3273_PI419772161	0.00161494	55.9065	up	Spag4	NM_139151	Mus musculus sperm associated antigen 4 (Spag4), mRNA [NM_139151]
CUST_21787_PI419772161	0.00145343	55.8542	up	Tas1r1	NM_031867	Mus musculus taste receptor, type 1, member 1 (Tas1r1), mRNA [NM_031867]
CUST_783_PI419772161	0.000358086	55.4128	up	Lrrc36	NM_001033371	Mus musculus leucine rich repeat containing 36 (Lrrc36), transcript variant 3, mRNA [NM_001033371]
CUST_22045_PI419772161	0.000547489	55.3947	up	1700011H14Rik	NM_025956	Mus musculus RIKEN cDNA 1700011H14 gene (1700011H14Rik), mRNA [NM_025956]
CUST_3351_PI419772161	0.00342004	55.3915	up	Tmc5	NM_028930	Mus musculus transmembrane channel-like gene family 5 (Tmc5), transcript variant 2, mRNA [NM_028930]
CUST_19033_PI419772161	0.000178905	55.275	up	Gm11992	NM_001037928	Mus musculus predicted gene 11992 (Gm11992), mRNA [NM_001037928]
CUST_18802_PI419772161	0.0130093	55.1896	up	Gm5538	NM_001101531	hypothetical protein LOC433597
CUST_14313_PI419772161	0.00250029	55.043	up	Ttc39a	NM_153392	Mus musculus tetratricopeptide repeat domain 39A (Ttc39a), transcript variant 2, mRNA [NM_153392]
CUST_835_PI419772161	0.00514443	54.8319	up	6030429G01Rik	NM_001033548	hypothetical protein LOC436022
CUST_18035_PI419772161	0.00153186	54.824	up	Proc	NM_008934	protein C
CUST_14581_PI419772161	0.00147183	54.6171	up	Fam55c	NM_001134457	Mus musculus family with sequence similarity 55, member C (Fam55c), mRNA [NM_001134457]
CUST_18037_PI419772161	0.00139191	54.5063	up	Proc	NM_001042767	protein C
CUST_8227_PI419772161	0.00170916	54.4983	up	Ccdc42	NM_177779	Mus musculus coiled-coil domain containing 42 (Ccdc42), mRNA [NM_177779]
CUST_21023_PI419772161	1.74533e-05	54.4085	up	Abcc3	NM_029600	Mus musculus ATP-binding cassette, sub-family C (CFTR/MRP), member 3 (Abcc3), mRNA [NM_029600]
CUST_10904_PI419772161	0.000940049	54.4021	up	Rsph1	NM_025290	Mus musculus radial spoke head 1 homolog (Chlamydomonas) (Rsph1), mRNA [NM_025290]
CUST_13087_PI419772161	0.010718	54.2342	up	Nox3	NM_198958	Mus musculus NADPH oxidase 3 (Nox3), mRNA [NM_198958]
CUST_2242_PI419772161	0.00699205	54.1617	up	1700039E15Rik	NM_001033176	hypothetical protein LOC76713
CUST_4360_PI419772161	0.00142127	53.7835	up	1700037C18Rik	NM_028484	Mus musculus RIKEN cDNA 1700037C18 gene (1700037C18Rik), mRNA [NM_028484]
CUST_7075_PI419772161	0.00698376	53.7068	up	Tekt1	NM_011569	Mus musculus tektin 1 (Tekt1), mRNA [NM_011569]
CUST_14178_PI419772161	0.00130675	53.6313	up	Rnf32	NM_021470	Mus musculus ring finger protein 32 (Rnf32), mRNA [NM_021470]
CUST_15245_PI419772161	0.00341325	53.4937	up	Aldh8a1	NM_178713	Mus musculus aldehyde dehydrogenase 8 family, member A1 (Aldh8a1), mRNA [NM_178713]
CUST_10762_PI419772161	0.00111975	53.0941	up	Bcl2l15	NM_001142959	Mus musculus BCLl2-like 15 (Bcl2l15), transcript variant 1, mRNA [NM_001142959]
CUST_7951_PI419772161	0.000313326	53.0635	up	Slc30a3	NM_011773	Mus musculus solute carrier family 30 (zinc transporter), member 3 (Slc30a3), mRNA [NM_011773]
CUST_18038_PI419772161	0.00747002	52.9286	up	Proc	NM_001042768	Mus musculus protein C (Proc), transcript variant 3, mRNA [NM_001042768]
CUST_12894_PI419772161	0.000464146	52.7368	up	Dsg1b	NM_181682	Mus musculus desmoglein 1 beta (Dsg1b), mRNA [NM_181682]
CUST_22429_PI419772161	0.00398471	52.6098	up	Dkkl1	NM_015789	Mus musculus dickkopf-like 1 (Dkkl1), mRNA [NM_015789]
CUST_17856_PI419772161	0.0100069	52.4522	up	Sept12	NM_027669	Mus musculus septin 12 (Sept12), mRNA [NM_027669]
CUST_5560_PI419772161	0.00908036	52.4092	up	D630002G06Rik	NM_172776	Mus musculus RIKEN cDNA D630002G06 gene (D630002G06Rik), mRNA [NM_172776]
CUST_6645_PI419772161	0.000499477	52.2301	up	Fhdc1	NM_001033301	Mus musculus FH2 domain containing 1 (Fhdc1), mRNA [NM_001033301]
CUST_18584_PI419772161	0.0056791	52.0919	up	Abcb11	NM_021022	Mus musculus ATP-binding cassette, sub-family B (MDR/TAP), member 11 (Abcb11), mRNA [NM_021022]
CUST_3441_PI419772161	0.00169261	52.087	up	Serpinb9f	NM_183197	Mus musculus serine (or cysteine) peptidase inhibitor, clade B, member 9f (Serpinb9f), mRNA [NM_183197]
CUST_70_PI419772161	0.00064707	51.7363	up	BC049730	NM_199150	Mus musculus cDNA sequence BC049730 (BC049730), mRNA [NM_199150]
CUST_16127_PI419772161	0.00562626	51.7329	up	Rfx6	NM_001159389	regulatory factor X, 6 isoform 1
CUST_9840_PI419772161	0.00156199	51.5708	up	1700007K13Rik	NM_027040	Mus musculus RIKEN cDNA 1700007K13 gene (1700007K13Rik), mRNA [NM_027040]
CUST_13570_PI419772161	4.02828e-05	51.3735	up	Slc25a41	NM_175333	Mus musculus solute carrier family 25, member 41 (Slc25a41), mRNA [NM_175333]
CUST_3061_PI419772161	0.000102258	50.9099	up	Bspry	NM_138653	Mus musculus B-box and SPRY domain containing (Bspry), mRNA [NM_138653]
CUST_10368_PI419772161	0.000910235	50.8066	up	Aqp11	NM_175105	Mus musculus aquaporin 11 (Aqp11), mRNA [NM_175105]
CUST_16602_PI419772161	0.000203138	50.6786	up	Hfe2	NM_027126	Mus musculus hemochromatosis type 2 (juvenile) (human homolog) (Hfe2), mRNA [NM_027126]
CUST_8987_PI419772161	0.00043962	50.61	up	Pla2g4d	NM_001024137	phospholipase A2, group IVD
CUST_20587_PI419772161	0.000873477	50.5609	up	Pvrl3	NM_021496	Mus musculus poliovirus receptor-related 3 (Pvrl3), transcript variant beta, mRNA [NM_021496]
CUST_18220_PI419772161	0.000830435	50.4978	up	Cpt1b	NM_009948	Mus musculus carnitine palmitoyltransferase 1b, muscle (Cpt1b), nuclear gene encoding mitochondrial protein, mRNA [NM_009948]
CUST_4940_PI419772161	0.00093482	50.4474	up	Tmc5	NM_001105252	transmembrane channel-like 5 isoform a
CUST_16003_PI419772161	0.00285261	50.3496	up	Itgae	NM_008399	Mus musculus integrin alpha E, epithelial-associated (Itgae), transcript variant 1, mRNA [NM_008399]
CUST_16889_PI419772161	4.41141e-05	50.1854	up	Pde6h	NM_023898	Mus musculus phosphodiesterase 6H, cGMP-specific, cone, gamma (Pde6h), mRNA [NM_023898]
CUST_280_PI419772161	0.00476699	49.5674	up	BC049762	NM_177567	Mus musculus cDNA sequence BC049762 (BC049762), mRNA [NM_177567]
CUST_3276_PI419772161	0.000757148	49.3829	up	Cpsf4l	NM_029794	Mus musculus cleavage and polyadenylation specific factor 4-like (Cpsf4l), transcript variant 2, mRNA [NM_029794]
A_51_P191669	0.000568447	49.3279	up	Chgb	NM_007694	Mus musculus chromogranin B (Chgb), mRNA [NM_007694]
CUST_121_PI419772161	0.00074616	49.192	up	Fbxw18	NM_001033794	Mus musculus F-box and WD-40 domain protein 18 (Fbxw18), mRNA [NM_001033794]
CUST_14603_PI419772161	0.0215673	49.1715	up	Ccdc7	NM_029061	Mus musculus coiled-coil domain containing 7 (Ccdc7), mRNA [NM_029061]
CUST_1255_PI419772161	0.00110167	48.9751	up	Cpsf4l	NM_026682	cleavage and polyadenylation specific factor
CUST_7114_PI419772161	0.000289366	48.8798	up	Acrbp	NM_016845	Mus musculus proacrosin binding protein (Acrbp), transcript variant 1, mRNA [NM_016845]
CUST_16793_PI419772161	0.00288929	48.7594	up	Enkur	NM_027728	Mus musculus enkurin, TRPC channel interacting protein (Enkur), mRNA [NM_027728]
CUST_785_PI419772161	0.000200002	48.3364	up	A930018P22Rik	NM_026634	Mus musculus RIKEN cDNA A930018P22 gene (A930018P22Rik), mRNA [NM_026634]
CUST_8700_PI419772161	0.000136521	48.291	up	Kiss1	NM_178260	Mus musculus KiSS-1 metastasis-suppressor (Kiss1), mRNA [NM_178260]
CUST_22022_PI419772161	2.07415e-05	48.1508	up	Kif9	NM_010628	Mus musculus kinesin family member 9 (Kif9), transcript variant 2, mRNA [NM_010628]
CUST_3398_PI419772161	0.00011256	48.0442	up	Dysfip1	NM_026814	Mus musculus dysferlin interacting protein 1 (Dysfip1), mRNA [NM_026814]
CUST_5408_PI419772161	0.000558881	47.787	up	Dhrs2	NM_027790	Mus musculus dehydrogenase/reductase member 2 (Dhrs2), mRNA [NM_027790]
CUST_19744_PI419772161	0.000156329	47.3035	up	Sult1e1	NM_023135	Mus musculus sulfotransferase family 1E, member 1 (Sult1e1), mRNA [NM_023135]
CUST_7914_PI419772161	0.000660465	47.2479	up	Tex28	NM_001126488	testis expressed 28
CUST_19672_PI419772161	3.34576e-05	46.8414	up	Ppm1j	NM_027982	Mus musculus protein phosphatase 1J (Ppm1j), mRNA [NM_027982]
CUST_2002_PI419772161	0.0081515	46.8133	up	Kcnh8	NM_001031811	Mus musculus potassium voltage-gated channel, subfamily H (eag-related), member 8 (Kcnh8), mRNA [NM_001031811]
CUST_16118_PI419772161	0.00166175	46.5876	up	Cd59b	NM_181858	Mus musculus CD59b antigen (Cd59b), mRNA [NM_181858]
CUST_22039_PI419772161	0.000416033	46.377	up	Lrrcc1	NM_028915	Mus musculus leucine rich repeat and coiled-coil domain containing 1 (Lrrcc1), transcript variant 3, mRNA [NM_028915]
CUST_13534_PI419772161	3.98474e-05	46.2425	up	Zscan4d	NM_001100186	zinc finger and SCAN domain containing 4D
CUST_5975_PI419772161	0.000697542	45.8456	up	Ttc9	NM_001033149	Mus musculus tetratricopeptide repeat domain 9 (Ttc9), mRNA [NM_001033149]
CUST_12674_PI419772161	0.0045256	45.8205	up	Pacrg	NM_027032	Mus musculus PARK2 co-regulated (Pacrg), mRNA [NM_027032]
CUST_19215_PI419772161	0.00147001	45.5258	up	Gm7120	NM_001039244	Mus musculus predicted gene 7120 (Gm7120), transcript variant 1, mRNA [NM_001039244]
CUST_808_PI419772161	0.000123218	44.5437	up	1700021C14Rik	NM_029801	Mus musculus RIKEN cDNA 1700021C14 gene (1700021C14Rik), mRNA [NM_029801]
CUST_855_PI419772161	0.0010837	44.5022	up	4933425O20Rik	NM_025753	Mus musculus RIKEN cDNA 4933425O20 gene (4933425O20Rik), mRNA [NM_025753]
CUST_140_PI419772161	0.00161287	44.4403	up	A830093I24Rik	NM_175431	Mus musculus RIKEN cDNA A830093I24 gene (A830093I24Rik), mRNA [NM_175431]
CUST_6562_PI419772161	0.000464716	44.3821	up	Pth2r	NM_139270	Mus musculus parathyroid hormone 2 receptor (Pth2r), mRNA [NM_139270]
CUST_2991_PI419772161	0.0279419	44.2472	up	BC026439	NM_172378	Mus musculus cDNA sequence BC026439 (BC026439), mRNA [NM_172378]
CUST_16487_PI419772161	0.000331706	44.2032	up	Bhmt	NM_016668	Mus musculus betaine-homocysteine methyltransferase (Bhmt), mRNA [NM_016668]
CUST_9955_PI419772161	0.00507434	44.1314	up	Golga7b	NM_001141983	golgi autoantigen, golgin subfamily a, 7B
CUST_18965_PI419772161	0.00127995	43.9332	up	Gm6041	NM_001025382	hypothetical protein LOC574403
CUST_4434_PI419772161	0.00779862	43.9289	up	1300014I06Rik	NM_025831	Mus musculus RIKEN cDNA 1300014I06 gene (1300014I06Rik), mRNA [NM_025831]
CUST_17770_PI419772161	6.5796e-05	43.903	up	Ndst4	NM_022565	Mus musculus N-deacetylase/N-sulfotransferase (heparin glucosaminyl) 4 (Ndst4), mRNA [NM_022565]
CUST_16750_PI419772161	0.0116256	43.8035	up	Anks4b	NM_028085	Mus musculus ankyrin repeat and sterile alpha motif domain containing 4B (Anks4b), mRNA [NM_028085]
CUST_18821_PI419772161	0.00200958	43.755	up	Gm1527	NM_001033479	hypothetical protein LOC385263
CUST_7082_PI419772161	0.000339482	43.3448	up	Stard6	NM_029019	Mus musculus StAR-related lipid transfer (START) domain containing 6 (Stard6), mRNA [NM_029019]
CUST_8234_PI419772161	0.000799746	43.2737	up	Gpr160	NM_027965	G protein-coupled receptor 160
CUST_3416_PI419772161	0.0240089	42.9098	up	Olfr303	NM_146619	Mus musculus olfactory receptor 303 (Olfr303), mRNA [NM_146619]
CUST_3585_PI419772161	0.00414899	42.7782	up	E330017A01Rik	NM_175011	Mus musculus RIKEN cDNA E330017A01 gene (E330017A01Rik), mRNA [NM_175011]
CUST_16986_PI419772161	2.85671e-05	42.7469	up	Ccdc158	NM_177230	Mus musculus coiled-coil domain containing 158 (Ccdc158), mRNA [NM_177230]
CUST_15694_PI419772161	0.010201	42.7363	up	Izumo1	NM_001018013	Mus musculus izumo sperm-egg fusion 1 (Izumo1), mRNA [NM_001018013]
CUST_15984_PI419772161	0.00100463	42.5605	up	Ulk4	NM_177589	Mus musculus unc-51-like kinase 4 (C. elegans) (Ulk4), mRNA [NM_177589]
CUST_8226_PI419772161	0.000700209	42.4898	up	Agbl2	NM_178755	Mus musculus ATP/GTP binding protein-like 2 (Agbl2), mRNA [NM_178755]
CUST_7153_PI419772161	0.00434694	42.4824	up	A330021E22Rik	NM_172447	Mus musculus RIKEN cDNA A330021E22 gene (A330021E22Rik), mRNA [NM_172447]
CUST_3854_PI419772161	0.00121783	42.157	up	Syngr4	NM_021482	Mus musculus synaptogyrin 4 (Syngr4), mRNA [NM_021482]
CUST_8434_PI419772161	0.000491505	42.1348	up	4930588N13Rik	NM_029464	Mus musculus RIKEN cDNA 4930588N13 gene (4930588N13Rik), mRNA [NM_029464]
CUST_9796_PI419772161	0.00052516	41.9731	up	Pde4dip	NM_001110163	phosphodiesterase 4D interacting protein isoform
CUST_20617_PI419772161	0.0145056	41.9457	up	Aqp9	NM_022026	Mus musculus aquaporin 9 (Aqp9), mRNA [NM_022026]
CUST_12158_PI419772161	0.000725002	41.821	up	Ptpn20	NM_008978	Mus musculus protein tyrosine phosphatase, non-receptor type 20 (Ptpn20), mRNA [NM_008978]
CUST_21404_PI419772161	0.00719244	41.7008	up	Ambp	NM_007443	Mus musculus alpha 1 microglobulin/bikunin (Ambp), mRNA [NM_007443]
CUST_3874_PI419772161	0.00727929	41.6697	up	Capn13	NM_001033444	calpain 13
CUST_12117_PI419772161	0.00668738	41.621	up	Abra	NM_175456	Mus musculus actin-binding Rho activating protein (Abra), mRNA [NM_175456]
CUST_12816_PI419772161	0.0157473	41.5599	up	Csl	NM_027945	Mus musculus citrate synthase like (Csl), mRNA [NM_027945]
CUST_2073_PI419772161	0.00096088	41.3195	up	Phf7	NM_027949	Mus musculus PHD finger protein 7 (Phf7), mRNA [NM_027949]
CUST_15895_PI419772161	5.80654e-05	41.2037	up	Rfx2	NM_027787	regulatory factor X, 2 (influences HLA class II
CUST_7260_PI419772161	0.00258151	41.0808	up	Phactr3	NM_028806	Mus musculus phosphatase and actin regulator 3 (Phactr3), transcript variant 1, mRNA [NM_028806]
CUST_4754_PI419772161	0.00748125	40.8549	up	Olfr907	NM_146805	Mus musculus olfactory receptor 907 (Olfr907), mRNA [NM_146805]
CUST_16026_PI419772161	0.0062232	40.7924	up	Casr	NM_013803	Mus musculus calcium-sensing receptor (Casr), mRNA [NM_013803]
CUST_7917_PI419772161	0.00726066	40.6768	up	2010003H20Rik	NM_001081310	hypothetical protein LOC625286
CUST_1857_PI419772161	0.00327307	40.6458	up	1700061G19Rik	NM_030141	hypothetical protein LOC78625
CUST_1316_PI419772161	0.000133099	40.5749	up	Tcam1	NM_029467	Mus musculus testicular cell adhesion molecule 1 (Tcam1), mRNA [NM_029467]
CUST_4418_PI419772161	0.00348241	40.332	up	Ovol2	NM_026924	Mus musculus ovo-like 2 (Drosophila) (Ovol2), transcript variant A, mRNA [NM_026924]
CUST_8097_PI419772161	0.000295018	40.282	up	Fam166a	NM_026624	Mus musculus family with sequence similarity 166, member A (Fam166a), mRNA [NM_026624]
CUST_5155_PI419772161	0.0287082	40.253	up	Olfr127	NM_146377	Mus musculus olfactory receptor 127 (Olfr127), mRNA [NM_146377]
CUST_13992_PI419772161	0.00242984	40.134	up	4930579G22Rik	NM_026916	Mus musculus RIKEN cDNA 4930579G22 gene (4930579G22Rik), mRNA [NM_026916]
CUST_14314_PI419772161	0.000715677	40.1337	up	Ttc39a	NM_001145948	tetratricopeptide repeat domain 39A isoform 1
CUST_8232_PI419772161	0.000378506	40.1028	up	Gpr160	NM_001134386	G protein-coupled receptor 160
CUST_16114_PI419772161	6.11898e-05	40.0057	up	Mmel1	NM_013783	Mus musculus membrane metallo-endopeptidase-like 1 (Mmel1), mRNA [NM_013783]
CUST_18130_PI419772161	0.0223024	39.974	up	Hsd3b4	NM_008294	Mus musculus hydroxy-delta-5-steroid dehydrogenase, 3 beta- and steroid delta-isomerase 4 (Hsd3b4), transcript variant 2, mRNA [NM_008294]
CUST_9499_PI419772161	0.0086309	39.9346	up	Ros1	NM_011282	Ros1 proto-oncogene
CUST_11556_PI419772161	0.00749474	39.7641	up	Cnga4	NM_001033317	cyclic nucleotide gated channel alpha 4
CUST_10298_PI419772161	0.000703397	39.7131	up	Kcnk7	NM_010609	Mus musculus potassium channel, subfamily K, member 7 (Kcnk7), mRNA [NM_010609]
CUST_16713_PI419772161	0.00459292	39.6631	up	Plunc	NM_011126	Mus musculus palate, lung, and nasal epithelium associated (Plunc), mRNA [NM_011126]
CUST_17205_PI419772161	0.000127492	39.562	up	Slc2a3	NM_011401	Mus musculus solute carrier family 2 (facilitated glucose transporter), member 3 (Slc2a3), mRNA [NM_011401]
CUST_12567_PI419772161	0.009081	39.4691	up	Glrp1	NM_008132	Mus musculus glutamine repeat protein 1 (Glrp1), mRNA [NM_008132]
CUST_8479_PI419772161	0.000391238	39.3984	up	Clgn	NM_009904	Mus musculus calmegin (Clgn), mRNA [NM_009904]
CUST_20118_PI419772161	0.000805759	39.19	up	BC055111	NM_183182	Mus musculus cDNA sequence BC055111 (BC055111), mRNA [NM_183182]
CUST_1351_PI419772161	8.73138e-05	38.8204	up	1700109H08Rik	NM_029843	Mus musculus RIKEN cDNA 1700109H08 gene (1700109H08Rik), mRNA [NM_029843]
CUST_14016_PI419772161	0.00233871	38.626	up	Mak	NM_001145802	male germ cell-associated kinase isoform 3
CUST_10615_PI419772161	0.00255568	38.6106	up	Fbxo43	NM_001081253	Mus musculus F-box protein 43 (Fbxo43), mRNA [NM_001081253]
CUST_6674_PI419772161	5.75489e-05	38.558	up	5031410I06Rik	NM_207657	Mus musculus RIKEN cDNA 5031410I06 gene (5031410I06Rik), mRNA [NM_207657]
CUST_14015_PI419772161	0.000245381	38.5544	up	Mak	NM_008547	Mus musculus male germ cell-associated kinase (Mak), transcript variant 2, mRNA [NM_008547]
CUST_22311_PI419772161	0.00197917	38.4634	up	Nek11	NM_172461	Mus musculus NIMA (never in mitosis gene a)-related expressed kinase 11 (Nek11), mRNA [NM_172461]
CUST_7613_PI419772161	0.0149035	38.3608	up	Bpi	NM_177850	Mus musculus bactericidal permeablility increasing protein (Bpi), mRNA [NM_177850]
CUST_11064_PI419772161	0.000832189	38.093	up	Ccdc83	NM_029256	Mus musculus coiled-coil domain containing 83 (Ccdc83), mRNA [NM_029256]
CUST_11523_PI419772161	0.0188989	37.9207	up	Apol7c	NM_175391	Mus musculus apolipoprotein L 7c (Apol7c), mRNA [NM_175391]
CUST_20535_PI419772161	0.000867207	37.8174	up	Zscan4c	NM_001013765	Mus musculus zinc finger and SCAN domain containing 4C (Zscan4c), mRNA [NM_001013765]
CUST_1016_PI419772161	0.0394383	37.8128	up	4933413G19Rik	NM_027697	hypothetical protein LOC71149
CUST_16970_PI419772161	0.012674	37.8032	up	Kcnip4	NM_030265	Mus musculus Kv channel interacting protein 4 (Kcnip4), mRNA [NM_030265]
CUST_6395_PI419772161	0.00944788	37.7418	up	Wbscr28	NM_029681	Williams-Beuren syndrome chromosome region 28
CUST_17934_PI419772161	0.00120075	37.4914	up	Fam123c	NM_213727	Mus musculus family with sequence similarity 123, member C (Fam123c), mRNA [NM_213727]
CUST_14085_PI419772161	0.000678091	37.3638	up	Lrg1	NM_029796	Mus musculus leucine-rich alpha-2-glycoprotein 1 (Lrg1), mRNA [NM_029796]
CUST_536_PI419772161	0.00248195	37.3519	up	Fbxw16	NM_177070	Mus musculus F-box and WD-40 domain protein 16 (Fbxw16), mRNA [NM_177070]
CUST_7598_PI419772161	0.000889036	37.2919	up	Lrriq4	NM_026668	Mus musculus leucine-rich repeats and IQ motif containing 4 (Lrriq4), mRNA [NM_026668]
CUST_15047_PI419772161	0.00682012	37.2285	up	Dpy30	NM_024428	Mus musculus dpy-30 homolog (C. elegans) (Dpy30), transcript variant 1, mRNA [NM_024428]
CUST_8457_PI419772161	0.000808248	37.2099	up	Zscan4f	NM_001110316	zinc finger and SCAN domain containing 4F
CUST_18762_PI419772161	0.000198285	37.2081	up	Gm5169	NM_001040669	predicted gene 5169
CUST_118_PI419772161	0.000171797	37.204	up	Osgin1	NM_027950	Mus musculus oxidative stress induced growth inhibitor 1 (Osgin1), mRNA [NM_027950]
CUST_18735_PI419772161	0.00252397	37.065	up	Gm166	NM_001033040	Mus musculus predicted gene 166 (Gm166), mRNA [NM_001033040]
CUST_13868_PI419772161	0.000221821	36.9375	up	1700058C13Rik	NM_028528	Mus musculus RIKEN cDNA 1700058C13 gene (1700058C13Rik), mRNA [NM_028528]
CUST_16937_PI419772161	0.000138585	36.9178	up	Pde1a	NM_001009978	Mus musculus phosphodiesterase 1A, calmodulin-dependent (Pde1a), transcript variant 7, mRNA [NM_001009978]
CUST_10844_PI419772161	0.00123212	36.9134	up	Fam46c	NM_001142952	Mus musculus family with sequence similarity 46, member C (Fam46c), mRNA [NM_001142952]
CUST_18198_PI419772161	0.00031094	36.9051	up	Klkb1	NM_008455	Mus musculus kallikrein B, plasma 1 (Klkb1), mRNA [NM_008455]
CUST_9241_PI419772161	0.00546062	36.7898	up	Plb1	NM_001081407	Mus musculus phospholipase B1 (Plb1), transcript variant 1, mRNA [NM_001081407]
CUST_9079_PI419772161	0.0007453	36.6478	up	Art5	NM_007491	Mus musculus ADP-ribosyltransferase 5 (Art5), mRNA [NM_007491]
CUST_18575_PI419772161	0.00632686	36.4609	up	Asb4	NM_023048	Mus musculus ankyrin repeat and SOCS box-containing 4 (Asb4), mRNA [NM_023048]
CUST_3611_PI419772161	0.000343127	36.3845	up	Brdt	NM_001079873	bromodomain, testis-specific isoform B
CUST_1748_PI419772161	0.00025375	36.3667	up	Fsip1	NM_027759	Mus musculus fibrous sheath-interacting protein 1 (Fsip1), mRNA [NM_027759]
CUST_10798_PI419772161	0.00390767	36.3621	up	Bcl2l14	NM_025778	Mus musculus BCL2-like 14 (apoptosis facilitator) (Bcl2l14), mRNA [NM_025778]
CUST_19712_PI419772161	0.00387163	36.3049	up	Gif	NM_008118	Mus musculus gastric intrinsic factor (Gif), mRNA [NM_008118]
CUST_7206_PI419772161	7.46746e-05	36.2726	up	1700026D08Rik	NM_029335	Mus musculus RIKEN cDNA 1700026D08 gene (1700026D08Rik), mRNA [NM_029335]
CUST_5669_PI419772161	0.000188328	36.1949	up	Klf17	NM_029416	Mus musculus Kruppel-like factor 17 (Klf17), mRNA [NM_029416]
CUST_13305_PI419772161	0.000248761	36.1415	up	Crat	NM_007760	Mus musculus carnitine acetyltransferase (Crat), nuclear gene encoding mitochondrial protein, mRNA [NM_007760]
CUST_7880_PI419772161	0.000361131	35.9652	up	Bag5	NM_027404	Mus musculus BCL2-associated athanogene 5 (Bag5), mRNA [NM_027404]
CUST_14228_PI419772161	0.00310435	35.9237	up	Crtam	NM_019465	Mus musculus cytotoxic and regulatory T cell molecule (Crtam), mRNA [NM_019465]
CUST_14017_PI419772161	0.000461061	35.9088	up	Mak	NM_001145803	Mus musculus male germ cell-associated kinase (Mak), transcript variant 1, mRNA [NM_001145803]
CUST_12046_PI419772161	0.00278225	35.7378	up	Spata1	NM_027617	Mus musculus spermatogenesis associated 1 (Spata1), mRNA [NM_027617]
CUST_8235_PI419772161	0.0011308	35.5791	up	Gpr160	NM_001134385	Mus musculus G protein-coupled receptor 160 (Gpr160), transcript variant 1, mRNA [NM_001134385]
CUST_13735_PI419772161	0.00419199	35.5525	up	Lipi	NM_177142	Mus musculus lipase, member I (Lipi), mRNA [NM_177142]
CUST_14832_PI419772161	0.0063726	35.5249	up	Sord	NM_146126	Mus musculus sorbitol dehydrogenase (Sord), mRNA [NM_146126]
CUST_1338_PI419772161	0.00213458	35.4012	up	Krtap16-8	NM_130856	Mus musculus keratin associated protein 16-8 (Krtap16-8), mRNA [NM_130856]
CUST_8079_PI419772161	0.000340539	35.3399	up	Slc22a18	NM_001042760	Mus musculus solute carrier family 22 (organic cation transporter), member 18 (Slc22a18), transcript variant 2, mRNA [NM_001042760]
CUST_14652_PI419772161	0.000470291	35.0693	up	Arl11	NM_177337	Mus musculus ADP-ribosylation factor-like 11 (Arl11), mRNA [NM_177337]
CUST_14300_PI419772161	0.0228359	35.0039	up	Lhfpl3	NM_029990	lipoma HMGIC fusion partner-like 3 isoform 1
CUST_20502_PI419772161	7.22229e-05	34.9933	up	Nlrc4	NM_001033367	Mus musculus NLR family, CARD domain containing 4 (Nlrc4), mRNA [NM_001033367]
CUST_9747_PI419772161	0.000531213	34.9246	up	BC060267	NM_001110506	Mus musculus cDNA sequence BC060267 (BC060267), mRNA [NM_001110506]
CUST_8078_PI419772161	0.000132263	34.8797	up	Slc22a18	NM_008767	solute carrier family 22 (organic cation
CUST_19089_PI419772161	0.00227368	34.6085	up	Gm5416	NM_001082542	stefin A1 like 1
CUST_16917_PI419772161	0.00189485	34.4772	up	Rnls	NM_001146342	renalase, FAD-dependent amine oxidase
CUST_9947_PI419772161	3.08304e-05	34.4333	up	Fam46b	NM_175307	Mus musculus family with sequence similarity 46, member B (Fam46b), mRNA [NM_175307]
CUST_2566_PI419772161	0.00304116	34.3572	up	Osbp2	NM_152818	Mus musculus oxysterol binding protein 2 (Osbp2), mRNA [NM_152818]
CUST_1570_PI419772161	0.003384	34.0462	up	Lrp2bp	NM_026278	Mus musculus Lrp2 binding protein (Lrp2bp), mRNA [NM_026278]
CUST_1259_PI419772161	0.00266305	33.9336	up	1700042B14Rik	NM_001081671	Mus musculus RIKEN cDNA 1700042B14 gene (1700042B14Rik), mRNA [NM_001081671]
CUST_6722_PI419772161	0.00087337	33.7977	up	Pbx4	NM_001024954	Mus musculus pre-B-cell leukemia homeobox 4 (Pbx4), mRNA [NM_001024954]
CUST_21968_PI419772161	0.00193626	33.7908	up	Klk1b4	NM_010915	Mus musculus kallikrein 1-related pepidase b4 (Klk1b4), mRNA [NM_010915]
CUST_12212_PI419772161	0.00191311	33.7547	up	Bbs5	NM_028284	Mus musculus Bardet-Biedl syndrome 5 (human) (Bbs5), mRNA [NM_028284]
CUST_15894_PI419772161	8.76799e-05	33.4666	up	Rfx2	NM_009056	Mus musculus regulatory factor X, 2 (influences HLA class II expression) (Rfx2), transcript variant 2, mRNA [NM_009056]
CUST_17721_PI419772161	0.0030713	33.4237	up	Itgad	NM_001029872	integrin, alpha D
CUST_3612_PI419772161	0.0277389	33.4009	up	Rtp1	NM_001004151	Mus musculus receptor transporter protein 1 (Rtp1), mRNA [NM_001004151]
CUST_9291_PI419772161	0.000312687	33.3124	up	Gcnt3	NM_028087	Mus musculus glucosaminyl (N-acetyl) transferase 3, mucin type (Gcnt3), mRNA [NM_028087]
CUST_6110_PI419772161	0.00659019	33.1368	up	Pip	NM_008843	Mus musculus prolactin induced protein (Pip), mRNA [NM_008843]
CUST_772_PI419772161	0.0135342	33.0379	up	EG381936	NM_001037248	hypothetical protein LOC381936
CUST_21645_PI419772161	8.24291e-06	32.7372	up	Sqrdl	NM_021507	Mus musculus sulfide quinone reductase-like (yeast) (Sqrdl), nuclear gene encoding mitochondrial protein, transcript variant 1, mRNA [NM_021507]
CUST_18828_PI419772161	0.0308145	32.7098	up	Gm101	NM_001115074	Mus musculus predicted gene 101 (Gm101), mRNA [NM_001115074]
CUST_2284_PI419772161	0.012218	32.6714	up	Slc6a20b	NM_011731	Mus musculus solute carrier family 6 (neurotransmitter transporter), member 20B (Slc6a20b), mRNA [NM_011731]
CUST_964_PI419772161	0.00249664	32.6483	up	Ica1l	NM_027407	Mus musculus islet cell autoantigen 1-like (Ica1l), mRNA [NM_027407]
CUST_13846_PI419772161	0.000910372	32.5807	up	Lin7a	NM_001033223	lin 7 homolog a isoform 2
CUST_7215_PI419772161	0.000765713	32.5543	up	Wdr65	NM_026789	Mus musculus WD repeat domain 65 (Wdr65), mRNA [NM_026789]
CUST_10553_PI419772161	0.020491	32.5031	up	Tmed6	NM_025458	Mus musculus transmembrane emp24 protein transport domain containing 6 (Tmed6), mRNA [NM_025458]
CUST_21049_PI419772161	0.00172279	32.5005	up	Rag1	NM_009019	Mus musculus recombination activating gene 1 (Rag1), mRNA [NM_009019]
CUST_20924_PI419772161	0.00386301	32.4376	up	Fabp1	NM_017399	Mus musculus fatty acid binding protein 1, liver (Fabp1), mRNA [NM_017399]
CUST_2780_PI419772161	0.000318644	32.401	up	1700088E04Rik	NM_138581	Mus musculus RIKEN cDNA 1700088E04 gene (1700088E04Rik), mRNA [NM_138581]
CUST_19500_PI419772161	0.00198934	32.3357	up	Cyp19a1	NM_007810	Mus musculus cytochrome P450, family 19, subfamily a, polypeptide 1 (Cyp19a1), mRNA [NM_007810]
CUST_17739_PI419772161	0.00074748	32.3087	up	Als2cr11	NM_175200	Mus musculus amyotrophic lateral sclerosis 2 (juvenile) chromosome region, candidate 11 (human) (Als2cr11), mRNA [NM_175200]
CUST_7861_PI419772161	0.00356652	32.2707	up	Htr5b	NM_010483	Mus musculus 5-hydroxytryptamine (serotonin) receptor 5B (Htr5b), mRNA [NM_010483]
CUST_13845_PI419772161	4.18208e-07	32.2281	up	Lin7a	NM_001039354	Mus musculus lin-7 homolog A (C. elegans) (Lin7a), transcript variant 1, mRNA [NM_001039354]
CUST_11024_PI419772161	0.00388852	32.1538	up	Kif17	NM_010623	Mus musculus kinesin family member 17 (Kif17), mRNA [NM_010623]
CUST_18583_PI419772161	0.00222986	32.1205	up	Mag	NM_010758	Mus musculus myelin-associated glycoprotein (Mag), mRNA [NM_010758]
CUST_6101_PI419772161	0.0305234	32.0344	up	4930590J08Rik	NM_198668	Mus musculus RIKEN cDNA 4930590J08 gene (4930590J08Rik), mRNA [NM_198668]
CUST_12508_PI419772161	5.7533e-05	32.0003	up	Cryba2	NM_021541	Mus musculus crystallin, beta A2 (Cryba2), mRNA [NM_021541]
CUST_14955_PI419772161	0.000298626	31.9164	up	Dis3l	NM_172519	Mus musculus DIS3 mitotic control homolog (S. cerevisiae)-like (Dis3l), transcript variant 2, mRNA [NM_172519]
CUST_9954_PI419772161	0.00334271	31.8947	up	Golga7b	NM_027694	Mus musculus golgi autoantigen, golgin subfamily a, 7B (Golga7b), transcript variant 2, mRNA [NM_027694]
CUST_10772_PI419772161	0.00299684	31.8602	up	4921507P07Rik	NM_027564	Mus musculus RIKEN cDNA 4921507P07 gene (4921507P07Rik), mRNA [NM_027564]
CUST_1103_PI419772161	0.00181213	31.821	up	Lca5l	NM_001001492	Leber congenital amaurosis 5-like
CUST_8427_PI419772161	0.00741322	31.6102	up	Vwa5b1	NM_029401	Mus musculus von Willebrand factor A domain containing 5B1 (Vwa5b1), mRNA [NM_029401]
CUST_7244_PI419772161	0.0012774	31.5934	up	4930578N16Rik	NM_001077684	Mus musculus RIKEN cDNA 4930578N16 gene (4930578N16Rik), mRNA [NM_001077684]
CUST_16856_PI419772161	0.000365714	31.5523	up	Pde1c	NM_001159953	Mus musculus phosphodiesterase 1C (Pde1c), transcript variant 4, mRNA [NM_001159953]
CUST_6986_PI419772161	0.00152457	31.5029	up	Calr3	NM_028500	Mus musculus calreticulin 3 (Calr3), transcript variant 1, mRNA [NM_028500]
CUST_6780_PI419772161	0.00117685	31.408	up	Kcnk12	NM_199251	Mus musculus potassium channel, subfamily K, member 12 (Kcnk12), mRNA [NM_199251]
CUST_8964_PI419772161	0.0117085	31.3191	up	Bbox1	NM_130452	Mus musculus butyrobetaine (gamma), 2-oxoglutarate dioxygenase 1 (gamma-butyrobetaine hydroxylase) (Bbox1), mRNA [NM_130452]
CUST_13260_PI419772161	0.0007312	31.2932	up	Rgs9	NM_011268	Mus musculus regulator of G-protein signaling 9 (Rgs9), transcript variant 1, mRNA [NM_011268]
CUST_13141_PI419772161	0.00452841	31.1852	up	Pde10a	NM_011866	Mus musculus phosphodiesterase 10A (Pde10a), mRNA [NM_011866]
CUST_12211_PI419772161	0.00150443	30.8362	up	Lpxn	NM_134152	Mus musculus leupaxin (Lpxn), mRNA [NM_134152]
CUST_14083_PI419772161	0.00317574	30.6767	up	Chrm4	NM_007699	Mus musculus cholinergic receptor, muscarinic 4 (Chrm4), mRNA [NM_007699]
CUST_21216_PI419772161	0.02328	30.599	up	Il13	NM_008355	Mus musculus interleukin 13 (Il13), mRNA [NM_008355]
CUST_8880_PI419772161	0.00236941	30.3998	up	Fhad1	NM_177868	Mus musculus forkhead-associated (FHA) phosphopeptide binding domain 1 (Fhad1), mRNA [NM_177868]
CUST_15574_PI419772161	0.000241701	30.3476	up	Spata7	NM_178914	Mus musculus spermatogenesis associated 7 (Spata7), mRNA [NM_178914]
CUST_19156_PI419772161	0.00419595	30.317	up	Gm14151	NM_001097977	hypothetical protein LOC433486
CUST_5134_PI419772161	0.00922659	30.0962	up	Bnipl	NM_134253	Mus musculus BCL2/adenovirus E1B 19kD interacting protein like (Bnipl), transcript variant 1, mRNA [NM_134253]
CUST_802_PI419772161	0.000237188	30.0861	up	1700030J22Rik	NM_027103	Mus musculus RIKEN cDNA 1700030J22 gene (1700030J22Rik), mRNA [NM_027103]
CUST_19245_PI419772161	0.000139786	29.9267	up	Gm5840	NM_001080811	Splunc6
CUST_17423_PI419772161	0.00238256	29.914	up	Foxj1	NM_008240	Mus musculus forkhead box J1 (Foxj1), mRNA [NM_008240]
CUST_6149_PI419772161	0.00905672	29.8838	up	Dcst1	NM_029974	Mus musculus DC-STAMP domain containing 1 (Dcst1), mRNA [NM_029974]
CUST_14391_PI419772161	0.000531036	29.7821	up	Pla2g2c	NM_008868	Mus musculus phospholipase A2, group IIC (Pla2g2c), mRNA [NM_008868]
CUST_9210_PI419772161	6.71788e-05	29.7087	up	Fam184a	NM_001081428	Mus musculus family with sequence similarity 184, member A (Fam184a), mRNA [NM_001081428]
CUST_17172_PI419772161	0.00560894	29.6613	up	Slc14a2	NM_207651	Mus musculus solute carrier family 14 (urea transporter), member 2 (Slc14a2), transcript variant 1, mRNA [NM_207651]
CUST_21255_PI419772161	0.0012581	29.5933	up	Col2a1	NM_031163	Mus musculus collagen, type II, alpha 1 (Col2a1), transcript variant 1, mRNA [NM_031163]
CUST_4540_PI419772161	0.00402027	29.4576	up	2900011O08Rik	NM_144518	Mus musculus RIKEN cDNA 2900011O08 gene (2900011O08Rik), mRNA [NM_144518]
CUST_14167_PI419772161	0.0131465	29.4322	up	Lamb3	NM_008484	Mus musculus laminin, beta 3 (Lamb3), mRNA [NM_008484]
CUST_13532_PI419772161	0.0486486	29.3736	up	Etv2	NM_007959	Mus musculus ets variant gene 2 (Etv2), mRNA [NM_007959]
CUST_19545_PI419772161	0.000361714	29.3637	up	Rhcg	NM_019799	Mus musculus Rhesus blood group-associated C glycoprotein (Rhcg), mRNA [NM_019799]
CUST_9242_PI419772161	0.002082	29.2961	up	Plb1	NM_030072	Mus musculus phospholipase B1 (Plb1), transcript variant 2, mRNA [NM_030072]
CUST_1029_PI419772161	0.000488808	29.2704	up	Wdr93	NM_001037927	Mus musculus WD repeat domain 93 (Wdr93), mRNA [NM_001037927]
CUST_7479_PI419772161	0.00658605	29.1782	up	Slc22a12	NM_009203	Mus musculus solute carrier family 22 (organic anion/cation transporter), member 12 (Slc22a12), mRNA [NM_009203]
CUST_19638_PI419772161	0.000329252	29.1075	up	Ceacam1	NM_001039186	Mus musculus carcinoembryonic antigen-related cell adhesion molecule 1 (Ceacam1), transcript variant 2, mRNA [NM_001039186]
CUST_1083_PI419772161	0.008623	28.9958	up	4930555I21Rik	NM_030189	Mus musculus RIKEN cDNA 4930555I21 gene (4930555I21Rik), mRNA [NM_030189]
CUST_919_PI419772161	0.000624913	28.9054	up	4732415M23Rik	NM_177279	Mus musculus RIKEN cDNA 4732415M23 gene (4732415M23Rik), mRNA [NM_177279]
CUST_20640_PI419772161	0.000265032	28.8938	up	Vash2	NM_144879	Mus musculus vasohibin 2 (Vash2), transcript variant 1, mRNA [NM_144879]
CUST_11320_PI419772161	0.00212563	28.8739	up	4933422H20Rik	NM_001033775	Mus musculus RIKEN cDNA 4933422H20 gene (4933422H20Rik), mRNA [NM_001033775]
CUST_117_PI419772161	0.00200796	28.8521	up	Ccdc96	NM_025725	Mus musculus coiled-coil domain containing 96 (Ccdc96), mRNA [NM_025725]
CUST_14279_PI419772161	0.000156692	28.8004	up	Gsto2	NM_026619	Mus musculus glutathione S-transferase omega 2 (Gsto2), mRNA [NM_026619]
CUST_18785_PI419772161	0.00025897	28.6654	up	Gm88	NM_001111142	Mus musculus predicted gene 88 (Gm88), mRNA [NM_001111142]
CUST_10046_PI419772161	0.00370788	28.588	up	Ubtfl1	NM_001033793	upstream binding transcription factor, RNA
CUST_7413_PI419772161	0.00116146	28.4913	up	D830030K20Rik	NM_177135	Mus musculus RIKEN cDNA D830030K20 gene (D830030K20Rik), mRNA [NM_177135]
CUST_1202_PI419772161	0.00297033	28.4465	up	Ankrd42	NM_028665	Mus musculus ankyrin repeat domain 42 (Ankrd42), mRNA [NM_028665]
CUST_6705_PI419772161	0.00052811	28.3309	up	Clnk	NM_013748	Mus musculus cytokine-dependent hematopoietic cell linker (Clnk), mRNA [NM_013748]
CUST_6624_PI419772161	0.00667286	28.3155	up	Atp6v1b1	NM_134157	Mus musculus ATPase, H+ transporting, lysosomal V1 subunit B1 (Atp6v1b1), mRNA [NM_134157]
CUST_7162_PI419772161	0.00024102	28.2907	up	1700040L02Rik	NM_028491	Mus musculus RIKEN cDNA 1700040L02 gene (1700040L02Rik), mRNA [NM_028491]
CUST_961_PI419772161	0.000108481	28.1874	up	4930534B04Rik	NM_181815	Mus musculus RIKEN cDNA 4930534B04 gene (4930534B04Rik), mRNA [NM_181815]
CUST_9482_PI419772161	0.0072344	28.1763	up	Pip5kl1	NM_198191	Mus musculus phosphatidylinositol-4-phosphate 5-kinase-like 1 (Pip5kl1), mRNA [NM_198191]
CUST_9270_PI419772161	0.00123237	28.0514	up	Grk4	NM_019497	Mus musculus G protein-coupled receptor kinase 4 (Grk4), transcript variant 1, mRNA [NM_019497]
CUST_5477_PI419772161	0.00146274	28.0465	up	Serpini2	NM_026460	Mus musculus serine (or cysteine) peptidase inhibitor, clade I, member 2 (Serpini2), mRNA [NM_026460]
CUST_21489_PI419772161	0.000762796	27.8826	up	Col2a1	NM_001113515	collagen, type II, alpha 1 isoform 2 precursor
CUST_3745_PI419772161	0.0119264	27.8267	up	Olfr144	NM_207665	Mus musculus olfactory receptor 144 (Olfr144), mRNA [NM_207665]
CUST_13527_PI419772161	0.00216475	27.7788	up	Spo11	NM_001083960	sporulation protein, meiosis-specific, SPO11
CUST_10135_PI419772161	0.00175441	27.7415	up	1110032A03Rik	NM_023483	Mus musculus RIKEN cDNA 1110032A03 gene (1110032A03Rik), mRNA [NM_023483]
CUST_13770_PI419772161	0.00249997	27.7044	up	Zfp541	NM_001099277	Mus musculus zinc finger protein 541 (Zfp541), mRNA [NM_001099277]
CUST_12276_PI419772161	0.00165633	27.5798	up	Lipf	NM_026334	Mus musculus lipase, gastric (Lipf), mRNA [NM_026334]
CUST_21431_PI419772161	0.00435287	27.461	up	Mtnr1a	NM_008639	Mus musculus melatonin receptor 1A (Mtnr1a), mRNA [NM_008639]
CUST_5976_PI419772161	0.00726919	27.4586	up	4931432M23Rik	NM_027640	RIKEN cDNA 4931432M23
CUST_6423_PI419772161	0.0066032	27.3756	up	Aebp2	NM_009637	Mus musculus AE binding protein 2 (Aebp2), transcript variant 3, mRNA [NM_009637]
CUST_21786_PI419772161	0.0017604	27.2495	up	Prl2c3	NM_011118	Mus musculus prolactin family 2, subfamily c, member 3 (Prl2c3), mRNA [NM_011118]
CUST_14347_PI419772161	0.00244513	27.1964	up	Rwdd2a	NM_027100	Mus musculus RWD domain containing 2A (Rwdd2a), transcript variant 1, mRNA [NM_027100]
CUST_6389_PI419772161	0.000125439	27.0183	up	Oog1	NM_178657	Mus musculus oogenesin 1 (Oog1), mRNA [NM_178657]
CUST_9005_PI419772161	0.00128413	27.0119	up	Ppil6	NM_028430	Mus musculus peptidylprolyl isomerase (cyclophilin)-like 6 (Ppil6), mRNA [NM_028430]
CUST_342_PI419772161	0.000124108	26.9352	up	C78339	NM_001033192	Autosomal Highly Conserved Protein
CUST_8261_PI419772161	3.23918e-05	26.8763	up	Unc93a	NM_199252	Mus musculus unc-93 homolog A (C. elegans) (Unc93a), mRNA [NM_199252]
CUST_4868_PI419772161	0.00034775	26.8326	up	Fbxo2	NM_176848	Mus musculus F-box protein 2 (Fbxo2), mRNA [NM_176848]
CUST_12827_PI419772161	0.000202253	26.7466	up	Csmd3	NM_001081391	Mus musculus CUB and Sushi multiple domains 3 (Csmd3), mRNA [NM_001081391]
CUST_15872_PI419772161	0.000303889	26.7316	up	Ppm1b	NM_001159497	protein phosphatase 1B isoform 3
CUST_9427_PI419772161	0.000434873	26.6707	up	Dupd1	NM_001013826	Mus musculus dual specificity phosphatase and pro isomerase domain containing 1 (Dupd1), mRNA [NM_001013826]
CUST_9671_PI419772161	0.0256803	26.5488	up	Slc18a3	NM_021712	Mus musculus solute carrier family 18 (vesicular monoamine), member 3 (Slc18a3), mRNA [NM_021712]
CUST_8159_PI419772161	0.0154135	26.5377	up	Slc17a8	NM_182959	Mus musculus solute carrier family 17 (sodium-dependent inorganic phosphate cotransporter), member 8 (Slc17a8), mRNA [NM_182959]
CUST_4622_PI419772161	0.0284678	26.5197	up	Olfr944	NM_146507	Mus musculus olfactory receptor 944 (Olfr944), mRNA [NM_146507]
CUST_11476_PI419772161	0.000454565	26.5174	up	Ralgps1	NM_175211	Mus musculus Ral GEF with PH domain and SH3 binding motif 1 (Ralgps1), mRNA [NM_175211]
CUST_21947_PI419772161	0.00121622	26.5158	up	Nkapl	NM_025719	Mus musculus NFKB activating protein-like (Nkapl), mRNA [NM_025719]
CUST_10380_PI419772161	0.000148436	26.4887	up	Slc16a7	NM_011391	Mus musculus solute carrier family 16 (monocarboxylic acid transporters), member 7 (Slc16a7), mRNA [NM_011391]
CUST_13869_PI419772161	0.000270744	26.4621	up	Rsph9	NM_029338	Mus musculus radial spoke head 9 homolog (Chlamydomonas) (Rsph9), mRNA [NM_029338]
CUST_14348_PI419772161	0.000367479	26.2935	up	Rwdd2a	NM_001145968	RWD domain containing 2A
CUST_15300_PI419772161	0.00250206	26.2573	up	Mdga2	NM_207010	Mus musculus MAM domain containing glycosylphosphatidylinositol anchor 2 (Mdga2), mRNA [NM_207010]
CUST_9292_PI419772161	0.0199012	26.0671	up	Ptprq	NM_001081432	Mus musculus protein tyrosine phosphatase, receptor type, Q (Ptprq), mRNA [NM_001081432]
CUST_5127_PI419772161	0.0075423	26.0089	up	Pcnxl2	NM_175561	Mus musculus pecanex-like 2 (Drosophila) (Pcnxl2), transcript variant 2, mRNA [NM_175561]
CUST_19641_PI419772161	0.000142134	25.9917	up	Ceacam1	NM_001039187	carcinoembryonic antigen-related cell adhesion
CUST_9564_PI419772161	0.00012875	25.9912	up	Tktl2	NM_028927	Mus musculus transketolase-like 2 (Tktl2), mRNA [NM_028927]
CUST_10601_PI419772161	0.00447962	25.9666	up	Ubxn10	NM_178671	Mus musculus UBX domain protein 10 (Ubxn10), mRNA [NM_178671]
CUST_21042_PI419772161	0.00322302	25.9507	up	Comp	NM_016685	Mus musculus cartilage oligomeric matrix protein (Comp), mRNA [NM_016685]
CUST_21015_PI419772161	3.58978e-05	25.8708	up	Dhx58	NM_030150	Mus musculus DEXH (Asp-Glu-X-His) box polypeptide 58 (Dhx58), mRNA [NM_030150]
CUST_10515_PI419772161	0.00315512	25.6005	up	Spa17	NM_011449	Mus musculus sperm autoantigenic protein 17 (Spa17), mRNA [NM_011449]
CUST_19637_PI419772161	0.00013387	25.5705	up	Ceacam1	NM_001039185	Mus musculus carcinoembryonic antigen-related cell adhesion molecule 1 (Ceacam1), transcript variant 1, mRNA [NM_001039185]
CUST_2240_PI419772161	0.00523144	25.5581	up	Mapk8ip2	NM_021921	Mus musculus mitogen-activated protein kinase 8 interacting protein 2 (Mapk8ip2), mRNA [NM_021921]
CUST_12629_PI419772161	0.000204972	25.3687	up	Pex11c	NM_026951	Mus musculus peroxisomal biogenesis factor 11 gamma (Pex11c), mRNA [NM_026951]
CUST_10051_PI419772161	0.0124232	25.3585	up	Iqcf6	NM_001101628	IQ motif containing F6
CUST_13248_PI419772161	0.00401854	25.3001	up	Plcd4	NM_001081456	phospholipase C, delta 4 isoform 1
CUST_1399_PI419772161	0.00515029	25.2734	up	Gipc2	NM_016867	Mus musculus GIPC PDZ domain containing family, member 2 (Gipc2), mRNA [NM_016867]
CUST_19640_PI419772161	0.000273727	25.2142	up	Ceacam1	NM_011926	carcinoembryonic antigen-related cell adhesion
CUST_3278_PI419772161	0.00131914	24.9774	up	3110007F17Rik	NM_028426	Mus musculus RIKEN cDNA 3110007F17 gene (3110007F17Rik), mRNA [NM_028426]
CUST_4250_PI419772161	0.00234316	24.9764	up	Cd46	NM_010778	Mus musculus CD46 antigen, complement regulatory protein (Cd46), mRNA [NM_010778]
CUST_22378_PI419772161	0.00550104	24.9433	up	Sell	NM_011346	Mus musculus selectin, lymphocyte (Sell), transcript variant 1, mRNA [NM_011346]
CUST_10885_PI419772161	0.000130103	24.7604	up	4921523A10Rik	NM_173449	Mus musculus RIKEN cDNA 4921523A10 gene (4921523A10Rik), mRNA [NM_173449]
CUST_5662_PI419772161	0.0181302	24.741	up	Serpinb9b	NM_011452	Mus musculus serine (or cysteine) peptidase inhibitor, clade B, member 9b (Serpinb9b), mRNA [NM_011452]
CUST_8259_PI419772161	0.00480601	24.6248	up	Wfdc15a	NM_183271	Mus musculus WAP four-disulfide core domain 15A (Wfdc15a), mRNA [NM_183271]
CUST_14349_PI419772161	0.00060944	24.5992	up	Rwdd2a	NM_001145969	RWD domain containing 2A
CUST_21740_PI419772161	0.015185	24.4528	up	Bcmo1	NM_021486	Mus musculus beta-carotene 15,15'-monooxygenase (Bcmo1), transcript variant 1, mRNA [NM_021486]
CUST_6749_PI419772161	0.000861759	24.3329	up	Myom2	NM_008664	Mus musculus myomesin 2 (Myom2), mRNA [NM_008664]
CUST_10504_PI419772161	0.000316665	24.3112	up	Atp2c2	NM_026922	Mus musculus ATPase, Ca++ transporting, type 2C, member 2 (Atp2c2), mRNA [NM_026922]
CUST_14477_PI419772161	0.00798469	24.2502	up	AI429214	NM_001039220	hypothetical protein LOC621080
CUST_12069_PI419772161	0.0207439	24.2413	up	Vmn2r2	NM_001104592	vomeronasal 2, receptor 2
CUST_18360_PI419772161	0.00269514	24.1722	up	Sox5	NM_001113559	SRY (sex determining region Y)-box 5 isoform b
CUST_14299_PI419772161	0.00275172	24.1042	up	Lhfpl3	NM_001081231	Mus musculus lipoma HMGIC fusion partner-like 3 (Lhfpl3), transcript variant 2, mRNA [NM_001081231]
CUST_18270_PI419772161	0.000210263	24.0951	up	Dnahc7b	NM_001160386	Mus musculus dynein, axonemal, heavy chain 7B (Dnahc7b), mRNA [NM_001160386]
CUST_2713_PI419772161	0.000388352	23.9064	up	5330417C22Rik	NM_001033304	Mus musculus RIKEN cDNA 5330417C22 gene (5330417C22Rik), mRNA [NM_001033304]
CUST_2486_PI419772161	0.000934045	23.7588	up	Lrrc48	NM_029044	Mus musculus leucine rich repeat containing 48 (Lrrc48), mRNA [NM_029044]
CUST_15138_PI419772161	0.00940487	23.7234	up	Tac1	NM_009311	Mus musculus tachykinin 1 (Tac1), mRNA [NM_009311]
CUST_8291_PI419772161	0.000201954	23.7135	up	5730559C18Rik	NM_028872	Mus musculus RIKEN cDNA 5730559C18 gene (5730559C18Rik), mRNA [NM_028872]
CUST_20244_PI419772161	0.00179647	23.6931	up	Sftpd	NM_009160	Mus musculus surfactant associated protein D (Sftpd), mRNA [NM_009160]
CUST_11083_PI419772161	0.0176355	23.6692	up	Vmn2r87	NM_001103366	Mus musculus vomeronasal 2, receptor 87 (Vmn2r87), mRNA [NM_001103366]
CUST_11534_PI419772161	0.000656261	23.5841	up	Yipf7	NM_023784	Mus musculus Yip1 domain family, member 7 (Yipf7), mRNA [NM_023784]
CUST_7154_PI419772161	1.91349e-05	23.5492	up	Tmem53	NM_026837	Mus musculus transmembrane protein 53 (Tmem53), mRNA [NM_026837]
CUST_12010_PI419772161	0.00154162	23.5387	up	4930550C14Rik	NM_029247	Mus musculus RIKEN cDNA 4930550C14 gene (4930550C14Rik), mRNA [NM_029247]
CUST_1621_PI419772161	0.0292683	23.5229	up	Ush2a	NM_021408	Mus musculus Usher syndrome 2A (autosomal recessive, mild) homolog (human) (Ush2a), mRNA [NM_021408]
CUST_3792_PI419772161	0.000991136	23.4641	up	Wdr31	NM_023597	Mus musculus WD repeat domain 31 (Wdr31), mRNA [NM_023597]
CUST_4212_PI419772161	0.000865081	23.3315	up	Mtl5	NM_001039657	Mus musculus metallothionein-like 5, testis-specific (tesmin) (Mtl5), transcript variant 1, mRNA [NM_001039657]
CUST_19772_PI419772161	0.00414751	23.2479	up	Trpm8	NM_134252	Mus musculus transient receptor potential cation channel, subfamily M, member 8 (Trpm8), mRNA [NM_134252]
CUST_3252_PI419772161	0.0393101	23.1201	up	Olfr27	NM_146829	Mus musculus olfactory receptor 27 (Olfr27), mRNA [NM_146829]
CUST_19610_PI419772161	0.00576406	23.1072	up	Trpm1	NM_001039104	transient receptor potential cation channel,
CUST_1117_PI419772161	0.00488987	23.1072	up	Tmem182	NM_001081198	transmembrane protein 182
CUST_690_PI419772161	3.87237e-05	23.0796	up	Dmrtc1b	NM_001039116	Mus musculus DMRT-like family C1b (Dmrtc1b), mRNA [NM_001039116]
CUST_9025_PI419772161	0.00356079	23.0696	up	Ngly1	NM_021504	Mus musculus N-glycanase 1 (Ngly1), mRNA [NM_021504]
CUST_13523_PI419772161	0.00446091	23.0055	up	Spo11	NM_012046	Mus musculus sporulation protein, meiosis-specific, SPO11 homolog (S. cerevisiae) (Spo11), transcript variant 1, mRNA [NM_012046]
CUST_15873_PI419772161	0.000368266	22.9878	up	Ppm1b	NM_001159498	protein phosphatase 1B isoform 4
CUST_2275_PI419772161	0.00665455	22.9688	up	Cyp2c66	NM_001011707	Mus musculus cytochrome P450, family 2, subfamily c, polypeptide 66 (Cyp2c66), mRNA [NM_001011707]
CUST_6564_PI419772161	0.00438655	22.9658	up	Spats1	NM_027649	Mus musculus spermatogenesis associated, serine-rich 1 (Spats1), mRNA [NM_027649]
CUST_7132_PI419772161	0.0215082	22.8663	up	Acrbp	NM_001127340	proacrosin binding protein isoform 2
CUST_19022_PI419772161	0.0148987	22.8323	up	Gm5891	NM_001034904	similar to serine/threonine kinase
CUST_20194_PI419772161	0.00557489	22.8058	up	Ptprj	NM_001135657	protein tyrosine phosphatase, receptor type, J
CUST_20944_PI419772161	0.00179439	22.7342	up	Nkx6-2	NM_183248	Mus musculus NK6 homeobox 2 (Nkx6-2), transcript variant 1, mRNA [NM_183248]
CUST_18982_PI419772161	0.00399925	22.6974	up	Gm4981	NM_001034869	hypothetical protein LOC245263
CUST_3217_PI419772161	0.0019698	22.6712	up	Cyp2c44	NM_001001446	Mus musculus cytochrome P450, family 2, subfamily c, polypeptide 44 (Cyp2c44), transcript variant 1, mRNA [NM_001001446]
CUST_13574_PI419772161	0.0101984	22.6678	up	Sycp2	NM_177191	Mus musculus synaptonemal complex protein 2 (Sycp2), mRNA [NM_177191]
CUST_14660_PI419772161	0.000161755	22.6473	up	Fam98c	NM_001146023	Mus musculus family with sequence similarity 98, member C (Fam98c), mRNA [NM_001146023]
CUST_15441_PI419772161	0.00192561	22.6249	up	Gabra5	NM_176942	Mus musculus gamma-aminobutyric acid (GABA) A receptor, subunit alpha 5 (Gabra5), mRNA [NM_176942]
CUST_7380_PI419772161	0.00119756	22.6084	up	Spata17	NM_028848	Mus musculus spermatogenesis associated 17 (Spata17), transcript variant 1, mRNA [NM_028848]
CUST_19252_PI419772161	0.00706216	22.4633	up	Nol4	NM_199024	Mus musculus nucleolar protein 4 (Nol4), transcript variant 2, mRNA [NM_199024]
CUST_7831_PI419772161	0.000956713	22.4514	up	2010106G01Rik	NM_023220	Mus musculus RIKEN cDNA 2010106G01 gene (2010106G01Rik), mRNA [NM_023220]
CUST_19748_PI419772161	2.47227e-05	22.442	up	Arsa	NM_009713	Mus musculus arylsulfatase A (Arsa), mRNA [NM_009713]
CUST_13526_PI419772161	0.00455449	22.3557	up	Spo11	NM_001083959	sporulation protein, meiosis-specific, SPO11
CUST_133_PI419772161	0.00144086	22.3405	up	Pih1d2	NM_028300	Mus musculus PIH1 domain containing 2 (Pih1d2), mRNA [NM_028300]
CUST_1184_PI419772161	0.000153033	22.3311	up	Pxt1	NM_153390	Mus musculus peroxisomal, testis specific 1 (Pxt1), mRNA [NM_153390]
CUST_7081_PI419772161	0.0165549	22.2888	up	Ttc25	NM_028918	Mus musculus tetratricopeptide repeat domain 25 (Ttc25), mRNA [NM_028918]
CUST_14084_PI419772161	0.000224374	22.1812	up	Dyrk3	NM_145508	Mus musculus dual-specificity tyrosine-(Y)-phosphorylation regulated kinase 3 (Dyrk3), mRNA [NM_145508]
CUST_3653_PI419772161	0.000791645	22.0473	up	Try4	NM_011646	trypsin 4
CUST_18757_PI419772161	0.0236235	22.0232	up	Gm806	NM_001033400	hypothetical protein LOC328250
CUST_20690_PI419772161	0.0035783	21.9538	up	Catsper2	NM_153075	Mus musculus cation channel, sperm associated 2 (Catsper2), mRNA [NM_153075]
CUST_7166_PI419772161	0.0230244	21.9519	up	Cyb5d1	NM_001045525	Mus musculus cytochrome b5 domain containing 1 (Cyb5d1), mRNA [NM_001045525]
CUST_16730_PI419772161	0.00151599	21.9213	up	Pcdha2	NM_198117	protocadherin alpha 2
CUST_1448_PI419772161	0.00128349	21.9085	up	2410137M14Rik	NM_029747	Mus musculus RIKEN cDNA 2410137M14 gene (2410137M14Rik), mRNA [NM_029747]
CUST_7384_PI419772161	0.000189089	21.8976	up	Sox30	NM_173384	Mus musculus SRY-box containing gene 30 (Sox30), mRNA [NM_173384]
CUST_8200_PI419772161	0.0061704	21.792	up	BC094916	NM_001024721	pyrin and HIN domain family-like
CUST_877_PI419772161	0.00845207	21.5922	up	Cntd1	NM_026562	Mus musculus cyclin N-terminal domain containing 1 (Cntd1), mRNA [NM_026562]
CUST_11273_PI419772161	0.00061686	21.578	up	Hspa2	NM_008301	Mus musculus heat shock protein 2 (Hspa2), transcript variant 1, mRNA [NM_008301]
CUST_11300_PI419772161	0.000489721	21.5659	up	Ccdc40	NM_175430	Mus musculus coiled-coil domain containing 40 (Ccdc40), mRNA [NM_175430]
CUST_10110_PI419772161	0.00128524	21.5469	up	Hspa2	NM_001002012	heat shock protein 2
CUST_9209_PI419772161	0.00455922	21.4592	up	Fam178b	NM_001126046	Mus musculus family with sequence similarity 178, member B (Fam178b), transcript variant A, mRNA [NM_001126046]
CUST_4052_PI419772161	0.00144407	21.2657	up	Npb	NM_153288	Mus musculus neuropeptide B (Npb), mRNA [NM_153288]
CUST_19002_PI419772161	0.000176935	21.2046	up	Gm10436	NM_001105254	oogenesin like
CUST_231_PI419772161	0.00148778	21.1633	up	Ccdc92	NM_144819	Mus musculus coiled-coil domain containing 92 (Ccdc92), mRNA [NM_144819]
CUST_4128_PI419772161	0.00543359	21.1314	up	Olfr213	NM_001011801	olfactory receptor 213
CUST_13982_PI419772161	0.000147142	21.0992	up	BC030307	NM_001003910	Mus musculus cDNA sequence BC030307 (BC030307), transcript variant 3, mRNA [NM_001003910]
CUST_7494_PI419772161	0.0112141	21.0895	up	Rnf112	NM_009548	Mus musculus ring finger protein 112 (Rnf112), mRNA [NM_009548]
CUST_12532_PI419772161	0.0022102	20.8477	up	Slc25a30	NM_026232	Mus musculus solute carrier family 25, member 30 (Slc25a30), nuclear gene encoding mitochondrial protein, mRNA [NM_026232]
CUST_171_PI419772161	0.000673594	20.8288	up	ENSMUSG00000068790	NM_001029930	hypothetical protein LOC545007
CUST_971_PI419772161	0.0103578	20.7356	up	Susd5	NM_001101510	sushi domain containing 5
CUST_4381_PI419772161	0.0377286	20.6806	up	Olfr180	NM_001011662	Mus musculus olfactory receptor 180 (Olfr180), mRNA [NM_001011662]
CUST_9696_PI419772161	0.0109902	20.68	up	Tekt2	NM_011902	Mus musculus tektin 2 (Tekt2), mRNA [NM_011902]
CUST_11942_PI419772161	0.00620712	20.6664	up	Asb12	NM_080858	Mus musculus ankyrin repeat and SOCS box-containing 12 (Asb12), mRNA [NM_080858]
CUST_10462_PI419772161	0.00182992	20.5953	up	Pira7	NM_011094	paired-Ig-like receptor A7
CUST_2890_PI419772161	0.000137157	20.5391	up	AA467197	NM_001004174	hypothetical protein LOC433470
CUST_7521_PI419772161	0.000270285	20.5389	up	C8b	NM_133882	Mus musculus complement component 8, beta polypeptide (C8b), mRNA [NM_133882]
CUST_13164_PI419772161	0.00382417	20.5197	up	Serpina1a	NM_009243	serine (or cysteine) proteinase inhibitor, clade
CUST_9033_PI419772161	5.7889e-05	20.5071	up	4930417M19Rik	NM_177195	Mus musculus RIKEN cDNA 4930417M19 gene (4930417M19Rik), mRNA [NM_177195]
CUST_20700_PI419772161	0.000271889	20.5064	up	Pcdha1	NM_054072	protocadherin alpha 1
CUST_18859_PI419772161	0.00109501	20.4812	up	Gm216	NM_001033345	hypothetical protein LOC241112
CUST_21636_PI419772161	0.000788584	20.3873	up	Phyhipl	NM_178621	Mus musculus phytanoyl-CoA hydroxylase interacting protein-like (Phyhipl), transcript variant 1, mRNA [NM_178621]
CUST_18052_PI419772161	0.00672899	20.3445	up	Tekt4	NM_027951	Mus musculus tektin 4 (Tekt4), mRNA [NM_027951]
CUST_7371_PI419772161	0.000538531	20.336	up	Slc1a7	NM_146255	Mus musculus solute carrier family 1 (glutamate transporter), member 7 (Slc1a7), mRNA [NM_146255]
CUST_2274_PI419772161	0.0133167	20.2956	up	Krt76	NM_001033177	Mus musculus keratin 76 (Krt76), mRNA [NM_001033177]
CUST_3095_PI419772161	0.000593807	20.2552	up	Pcdha3	NM_138662	protocadherin alpha 3
CUST_4669_PI419772161	0.000270584	20.1958	up	Znhit2	NM_013859	Mus musculus zinc finger, HIT domain containing 2 (Znhit2), mRNA [NM_013859]
CUST_19253_PI419772161	0.00071134	20.1793	up	Nol4	NM_001161483	nucleolar protein 4 isoform 1
CUST_9158_PI419772161	0.000794044	20.1755	up	Cdkl2	NM_177270	Mus musculus cyclin-dependent kinase-like 2 (CDC2-related kinase) (Cdkl2), transcript variant 2, mRNA [NM_177270]
CUST_13318_PI419772161	0.000382571	20.1217	up	Acyp1	NM_025421	Mus musculus acylphosphatase 1, erythrocyte (common) type (Acyp1), mRNA [NM_025421]
CUST_6857_PI419772161	0.00947448	20.117	up	Kcnip2	NM_145703	Mus musculus Kv channel-interacting protein 2 (Kcnip2), transcript variant a, mRNA [NM_145703]
CUST_1268_PI419772161	0.00023677	20.0655	up	Pcdha5	NM_009959	protocadherin alpha 5
CUST_3348_PI419772161	0.000291362	20.0549	up	Pcdha8	NM_201243	protocadherin alpha 8
CUST_11915_PI419772161	0.00814902	20.0421	up	Smtnl1	NM_024230	Mus musculus smoothelin-like 1 (Smtnl1), mRNA [NM_024230]
CUST_7569_PI419772161	0.00427958	20.0268	up	Ppp2r1b	NM_001034085	Mus musculus protein phosphatase 2 (formerly 2A), regulatory subunit A (PR 65), beta isoform (Ppp2r1b), transcript variant 1, mRNA [NM_001034085]
CUST_1319_PI419772161	0.000143913	20.013	up	Pcdhac2	NM_001003672	Mus musculus protocadherin alpha subfamily C, 2 (Pcdhac2), mRNA [NM_001003672]
CUST_1317_PI419772161	0.0134385	19.9709	up	Tex2	NM_198292	Mus musculus testis expressed gene 2 (Tex2), mRNA [NM_198292]
CUST_892_PI419772161	0.00438963	19.9164	up	Faim3	NM_026976	Mus musculus Fas apoptotic inhibitory molecule 3 (Faim3), mRNA [NM_026976]
CUST_2065_PI419772161	1.4618e-05	19.8725	up	Pcdha9	NM_138661	Mus musculus protocadherin alpha 9 (Pcdha9), mRNA [NM_138661]
CUST_6883_PI419772161	0.000776435	19.8588	up	Slamf9	NM_029612	Mus musculus SLAM family member 9 (Slamf9), mRNA [NM_029612]
CUST_12676_PI419772161	0.0025522	19.7169	up	Tal2	NM_009317	Mus musculus T-cell acute lymphocytic leukemia 2 (Tal2), mRNA [NM_009317]
CUST_14755_PI419772161	1.36807e-06	19.65	up	Ndufaf3	NM_023247	Mus musculus NADH dehydrogenase (ubiquinone) 1 alpha subcomplex, assembly factor 3 (Ndufaf3), nuclear gene encoding mitochondrial protein, mRNA [NM_023247]
CUST_4963_PI419772161	0.000108364	19.6292	up	Pcdha6	NM_007767	Mus musculus protocadherin alpha 6 (Pcdha6), mRNA [NM_007767]
CUST_20441_PI419772161	0.00542782	19.6266	up	Lcn2	NM_008491	Mus musculus lipocalin 2 (Lcn2), mRNA [NM_008491]
CUST_14320_PI419772161	0.00507007	19.5788	up	1700067K01Rik	NM_183097	Mus musculus RIKEN cDNA 1700067K01 gene (1700067K01Rik), mRNA [NM_183097]
CUST_18775_PI419772161	0.00433881	19.5731	up	Gm1019	NM_001001650	epidermis-specific serine protease-like
CUST_18961_PI419772161	0.00242034	19.5691	up	Gm16390	NM_001097980	hypothetical protein LOC100040937
CUST_481_PI419772161	0.00226763	19.5639	up	Morn2	NM_194269	Mus musculus MORN repeat containing 2 (Morn2), mRNA [NM_194269]
CUST_21834_PI419772161	0.0023469	19.4955	up	Samd7	NM_029489	Mus musculus sterile alpha motif domain containing 7 (Samd7), transcript variant 1, mRNA [NM_029489]
CUST_1599_PI419772161	0.000226721	19.3909	up	Pcdha4	NM_007766	Mus musculus protocadherin alpha 4 (Pcdha4), mRNA [NM_007766]
CUST_883_PI419772161	0.00163805	19.3736	up	1700012A16Rik	NM_001033162	Mus musculus RIKEN cDNA 1700012A16 gene (1700012A16Rik), mRNA [NM_001033162]
CUST_8942_PI419772161	0.00232147	19.3578	up	Cdkl2	NM_016912	Mus musculus cyclin-dependent kinase-like 2 (CDC2-related kinase) (Cdkl2), transcript variant 1, mRNA [NM_016912]
CUST_13856_PI419772161	0.000200744	19.3041	up	Fam71e2	NM_172895	Mus musculus family with sequence similarity 71, member E2 (Fam71e2), mRNA [NM_172895]
CUST_13471_PI419772161	0.00459312	19.2757	up	Col19a1	NM_007733	Mus musculus collagen, type XIX, alpha 1 (Col19a1), mRNA [NM_007733]
CUST_11563_PI419772161	0.000731133	19.2509	up	Osbpl10	NM_148958	Mus musculus oxysterol binding protein-like 10 (Osbpl10), mRNA [NM_148958]
CUST_11884_PI419772161	0.0192418	19.2491	up	Dnahc9	NM_001099633	Mus musculus dynein, axonemal, heavy chain 9 (Dnahc9), mRNA [NM_001099633]
CUST_6250_PI419772161	0.00270879	19.1415	up	Ttll9	NM_029064	Mus musculus tubulin tyrosine ligase-like family, member 9 (Ttll9), transcript variant 2, mRNA [NM_029064]
CUST_21277_PI419772161	0.00145328	19.0522	up	Serpina1c	NM_009245	Mus musculus serine (or cysteine) peptidase inhibitor, clade A, member 1C (Serpina1c), mRNA [NM_009245]
CUST_648_PI419772161	0.00482478	18.949	up	Vwa3a	NM_177697	von Willebrand factor A domain containing 3A
CUST_4641_PI419772161	0.000148312	18.9337	up	Pcdha12	NM_138663	protocadherin alpha 12
CUST_25_PI419772161	0.00342068	18.9168	up	1700022C21Rik	NM_029602	Mus musculus RIKEN cDNA 1700022C21 gene (1700022C21Rik), mRNA [NM_029602]
CUST_7429_PI419772161	0.00912363	18.9	up	Crb1	NM_133239	Mus musculus crumbs homolog 1 (Drosophila) (Crb1), mRNA [NM_133239]
CUST_16265_PI419772161	0.00135351	18.9	up	Usp2	NM_198091	ubiquitin specific peptidase 2 isoform Usp2-45
CUST_8677_PI419772161	0.00260582	18.8877	up	Pkd1l3	NM_001039700	polycystic kidney disease 1 like 3 isoform a
CUST_15940_PI419772161	3.05117e-05	18.8428	up	Mapk15	NM_177922	Mus musculus mitogen-activated protein kinase 15 (Mapk15), mRNA [NM_177922]
CUST_4904_PI419772161	0.000408003	18.8074	up	Pcdha10	NM_009961	protocadherin alpha 10
CUST_6582_PI419772161	0.000217783	18.6942	up	Pcdhac1	NM_001003671	protocadherin alpha subfamily C, 1
CUST_4406_PI419772161	0.0366481	18.6858	up	Olfr126	NM_146890	Mus musculus olfactory receptor 126 (Olfr126), mRNA [NM_146890]
CUST_22037_PI419772161	0.00307552	18.6765	up	Prom1	NM_008935	Mus musculus prominin 1 (Prom1), transcript variant 1, mRNA [NM_008935]
CUST_19736_PI419772161	0.00681346	18.6589	up	Grm1	NM_016976	Mus musculus glutamate receptor, metabotropic 1 (Grm1), transcript variant 1, mRNA [NM_016976]
CUST_16853_PI419772161	0.00338058	18.6492	up	Pde1c	NM_011054	Mus musculus phosphodiesterase 1C (Pde1c), transcript variant 1, mRNA [NM_011054]
CUST_13058_PI419772161	0.00158419	18.6024	up	Fam3b	NM_020622	Mus musculus family with sequence similarity 3, member B (Fam3b), mRNA [NM_020622]
CUST_16533_PI419772161	0.003676	18.5477	up	Myt1	NM_008665	Mus musculus myelin transcription factor 1 (Myt1), transcript variant 1, mRNA [NM_008665]
CUST_2218_PI419772161	0.00670872	18.5416	up	Tcte2	NM_022311	Mus musculus t-complex-associated testis expressed 2 (Tcte2), mRNA [NM_022311]
CUST_13887_PI419772161	0.0061831	18.4651	up	Pth2	NM_053256	Mus musculus parathyroid hormone 2 (Pth2), mRNA [NM_053256]
CUST_9641_PI419772161	0.0467122	18.4442	up	Atp10b	NM_176999	ATPase, class V, type 10B
CUST_19518_PI419772161	4.34078e-06	18.3293	up	Irak3	NM_028679	Mus musculus interleukin-1 receptor-associated kinase 3 (Irak3), mRNA [NM_028679]
CUST_9137_PI419772161	0.000251265	18.312	up	Cds1	NM_173370	Mus musculus CDP-diacylglycerol synthase 1 (Cds1), mRNA [NM_173370]
CUST_2441_PI419772161	0.00537446	18.2762	up	Fbxo36	NM_025386	Mus musculus F-box protein 36 (Fbxo36), mRNA [NM_025386]
CUST_20890_PI419772161	0.00840077	18.2651	up	Rora	NM_013646	Mus musculus RAR-related orphan receptor alpha (Rora), mRNA [NM_013646]
CUST_8927_PI419772161	0.018843	18.1783	up	Sccpdh	NM_178653	Mus musculus saccharopine dehydrogenase (putative) (Sccpdh), mRNA [NM_178653]
CUST_14428_PI419772161	0.000798725	18.1574	up	Pcdha11	NM_009960	protocadherin alpha 11
CUST_9831_PI419772161	0.00194241	18.0703	up	Ttll11	NM_029774	Mus musculus tubulin tyrosine ligase-like family, member 11 (Ttll11), transcript variant 1, mRNA [NM_029774]
CUST_21116_PI419772161	0.0389631	18.0537	up	Adig	NM_145635	Mus musculus adipogenin (Adig), mRNA [NM_145635]
CUST_2592_PI419772161	0.00677573	18.0439	up	Mettl7b	NM_027853	Mus musculus methyltransferase like 7B (Mettl7b), mRNA [NM_027853]
CUST_12984_PI419772161	0.00314063	18.0127	up	Sept4	NM_011129	Mus musculus septin 4 (Sept4), mRNA [NM_011129]
CUST_13870_PI419772161	0.000117946	17.9672	up	Fbll1	NM_001004147	Mus musculus fibrillarin-like 1 (Fbll1), mRNA [NM_001004147]
CUST_18435_PI419772161	0.00211567	17.8461	up	Vtcn1	NM_178594	Mus musculus V-set domain containing T cell activation inhibitor 1 (Vtcn1), mRNA [NM_178594]
CUST_21833_PI419772161	0.0141316	17.8338	up	Gm14137	NM_001039223	hypothetical protein LOC623781
CUST_478_PI419772161	0.000407469	17.8274	up	4933430I17Rik	NM_177607	Mus musculus RIKEN cDNA 4933430I17 gene (4933430I17Rik), mRNA [NM_177607]
CUST_13697_PI419772161	0.00363814	17.8132	up	Epm2a	NM_010146	laforin
CUST_10157_PI419772161	0.0055849	17.7939	up	Spdya	NM_029254	speedy homolog A isoform 1
CUST_448_PI419772161	0.000164471	17.7868	up	Ccdc88b	NM_001081291	Mus musculus coiled-coil domain containing 88B (Ccdc88b), mRNA [NM_001081291]
CUST_16680_PI419772161	0.00432405	17.7396	up	Abo	NM_030718	Mus musculus ABO blood group (transferase A, alpha 1-3-N-acetylgalactosaminyltransferase, transferase B, alpha 1-3-galactosyltransferase) (Abo), mRNA [NM_030718]
CUST_686_PI419772161	0.00968999	17.737	up	Slc22a9	NM_144785	Mus musculus solute carrier family 22 (organic anion transporter), member 9 (Slc22a9), mRNA [NM_144785]
CUST_4417_PI419772161	0.00228066	17.7354	up	Clec4b1	NM_027218	Mus musculus C-type lectin domain family 4, member b1 (Clec4b1), mRNA [NM_027218]
CUST_7373_PI419772161	0.000339859	17.6971	up	Slc24a1	NM_144813	Mus musculus solute carrier family 24 (sodium/potassium/calcium exchanger), member 1 (Slc24a1), mRNA [NM_144813]
CUST_19071_PI419772161	0.00399447	17.6537	up	Rffl	NM_026097	Mus musculus ring finger and FYVE like domain containing protein (Rffl), transcript variant 2, mRNA [NM_026097]
CUST_18997_PI419772161	0.0182205	17.6329	up	Gm9992	NM_001142539	predicted gene, ENSMUSG00000056133
CUST_16861_PI419772161	0.000636221	17.6134	up	Pde1c	NM_001159956	phosphodiesterase 1C isoform f
CUST_19_PI419772161	9.99655e-05	17.5499	up	3830417A13Rik	NM_027512	Mus musculus RIKEN cDNA 3830417A13 gene (3830417A13Rik), mRNA [NM_027512]
CUST_3795_PI419772161	0.000326166	17.4825	up	Lrrc56	NM_153777	Mus musculus leucine rich repeat containing 56 (Lrrc56), transcript variant 2, mRNA [NM_153777]
CUST_10421_PI419772161	0.000307377	17.4528	up	Corin	NM_016869	Mus musculus corin (Corin), transcript variant 1, mRNA [NM_016869]
CUST_11246_PI419772161	0.000733793	17.4215	up	Wdfy1	NM_027057	Mus musculus WD repeat and FYVE domain containing 1 (Wdfy1), transcript variant 2, mRNA [NM_027057]
CUST_9264_PI419772161	0.000226045	17.3138	up	Katnal1	NM_153572	Mus musculus katanin p60 subunit A-like 1 (Katnal1), mRNA [NM_153572]
CUST_13990_PI419772161	0.00862801	17.2918	up	Dnaic2	NM_001034878	dynein, axonemal, intermediate chain 2
CUST_1163_PI419772161	0.00401546	17.2559	up	Letm2	NM_173012	Mus musculus leucine zipper-EF-hand containing transmembrane protein 2 (Letm2), nuclear gene encoding mitochondrial protein, mRNA [NM_173012]
CUST_19190_PI419772161	0.0153936	17.2322	up	Serpinb6d	NM_001076790	Mus musculus serine (or cysteine) peptidase inhibitor, clade B, member 6d (Serpinb6d), mRNA [NM_001076790]
CUST_9295_PI419772161	0.000893941	17.2239	up	Ssh2	NM_177710	Mus musculus slingshot homolog 2 (Drosophila) (Ssh2), mRNA [NM_177710]
CUST_17841_PI419772161	0.00293866	17.2181	up	Fitm1	NM_026808	Mus musculus fat storage-inducing transmembrane protein 1 (Fitm1), mRNA [NM_026808]
CUST_18782_PI419772161	0.00071329	17.1998	up	Gm505	NM_001111141	Mus musculus predicted gene 505 (Gm505), mRNA [NM_001111141]
CUST_19102_PI419772161	0.0029512	17.1387	up	Gm5409	NM_001003664	Try10-like trypsinogen
CUST_19532_PI419772161	5.13912e-05	17.1301	up	Artn	NM_009711	Mus musculus artemin (Artn), mRNA [NM_009711]
CUST_942_PI419772161	0.00228216	17.0929	up	5133400G04Rik	NM_029485	TATA-binding protein-like factor-interacting
CUST_1454_PI419772161	8.09738e-05	17.0887	up	Elfn1	NM_175522	Mus musculus leucine rich repeat and fibronectin type III, extracellular 1 (Elfn1), mRNA [NM_175522]
CUST_20588_PI419772161	0.00244799	17.0707	up	Arc	NM_018790	Mus musculus activity regulated cytoskeletal-associated protein (Arc), mRNA [NM_018790]
CUST_3156_PI419772161	0.00193206	17.0423	up	Wfdc3	NM_027961	Mus musculus WAP four-disulfide core domain 3 (Wfdc3), mRNA [NM_027961]
CUST_11592_PI419772161	0.00550285	17.006	up	Cyp3a59	NM_001105160	cytochrome P450, subfamily 3A, polypeptide 59
CUST_1140_PI419772161	0.000399284	17.0043	up	Syce1l	NM_029139	Mus musculus synaptonemal complex central element protein 1 like (Syce1l), transcript variant 2, mRNA [NM_029139]
CUST_383_PI419772161	0.00224984	16.8826	up	1700028K03Rik	NM_182745	Mus musculus RIKEN cDNA 1700028K03 gene (1700028K03Rik), transcript variant 1, mRNA [NM_182745]
CUST_9357_PI419772161	1.52144e-06	16.8737	up	Hunk	NM_015755	Mus musculus hormonally upregulated Neu-associated kinase (Hunk), mRNA [NM_015755]
CUST_1795_PI419772161	0.00361469	16.8415	up	Tekt5	NM_001099275	tektin 5
CUST_18199_PI419772161	0.00531437	16.7278	up	Hao1	NM_010403	hydroxyacid oxidase 1
CUST_3454_PI419772161	0.0239991	16.7198	up	Olfr654	NM_146379	Mus musculus olfactory receptor 654 (Olfr654), mRNA [NM_146379]
CUST_11645_PI419772161	0.000436811	16.6919	up	Tcea2	NM_009326	Mus musculus transcription elongation factor A (SII), 2 (Tcea2), mRNA [NM_009326]
CUST_18852_PI419772161	0.0291272	16.6045	up	Gm597	NM_001013750	Mus musculus predicted gene 597 (Gm597), mRNA [NM_001013750]
CUST_1004_PI419772161	0.0262108	16.5878	up	4921537P18Rik	NM_027618	gonad specific ankyrin repeat protein isoform 2
CUST_19228_PI419772161	0.0141275	16.5368	up	Gm5460	NM_001034880	hypothetical protein LOC432838
CUST_17579_PI419772161	0.0297129	16.4358	up	Kcnj6	NM_001025590	potassium inwardly-rectifying channel J6 isoform
CUST_628_PI419772161	0.0129519	16.4222	up	Krtap17-1	NM_001099774	Mus musculus keratin associated protein 17-1 (Krtap17-1), mRNA [NM_001099774]
CUST_10522_PI419772161	0.00109567	16.3957	up	Cchcr1	NM_146248	Mus musculus coiled-coil alpha-helical rod protein 1 (Cchcr1), mRNA [NM_146248]
CUST_6856_PI419772161	0.00140238	16.3655	up	Kcnip2	NM_030716	Kv channel-interacting protein 2 isoform b
CUST_11497_PI419772161	0.0120551	16.299	up	Rassf9	NM_146240	Mus musculus Ras association (RalGDS/AF-6) domain family (N-terminal) member 9 (Rassf9), mRNA [NM_146240]
CUST_12682_PI419772161	0.00336354	16.2857	up	Atoh8	NM_153778	Mus musculus atonal homolog 8 (Drosophila) (Atoh8), mRNA [NM_153778]
CUST_3316_PI419772161	0.00155396	16.232	up	Pcdha7	NM_009957	protocadherin alpha 7
CUST_16215_PI419772161	0.000870857	16.2133	up	Gipr	NM_001080815	Mus musculus gastric inhibitory polypeptide receptor (Gipr), mRNA [NM_001080815]
CUST_9925_PI419772161	0.0125136	16.1978	up	March10	NM_172568	Mus musculus membrane-associated ring finger (C3HC4) 10 (March10), transcript variant 1, mRNA [NM_172568]
CUST_16263_PI419772161	0.00208827	16.1768	up	Usp2	NM_016808	ubiquitin specific peptidase 2 isoform Usp2-69
CUST_17678_PI419772161	0.00159638	16.1719	up	Ccdc155	NM_201374	Mus musculus coiled-coil domain containing 155 (Ccdc155), mRNA [NM_201374]
CUST_2594_PI419772161	0.0165027	16.1641	up	Sval2	NM_032542	Mus musculus seminal vesicle antigen-like 2 (Sval2), mRNA [NM_032542]
CUST_713_PI419772161	0.00211794	16.1437	up	Klhdc9	NM_001033039	Mus musculus kelch domain containing 9 (Klhdc9), mRNA [NM_001033039]
CUST_12957_PI419772161	0.01227	16.1355	up	Ccdc79	NM_180958	Mus musculus coiled-coil domain containing 79 (Ccdc79), mRNA [NM_180958]
CUST_22088_PI419772161	0.00242161	16.0963	up	Il11	NM_008350	Mus musculus interleukin 11 (Il11), mRNA [NM_008350]
CUST_5736_PI419772161	0.000814341	16.0603	up	Ndufa4l2	NM_001098789	NADH dehydrogenase (ubiquinone) 1 alpha
CUST_10423_PI419772161	0.000874189	15.9864	up	Corin	NM_001122756	corin isoform 2
CUST_15998_PI419772161	0.0110092	15.9711	up	Prr9	NM_175424	Mus musculus proline rich 9 (Prr9), mRNA [NM_175424]
CUST_17837_PI419772161	0.0083358	15.9619	up	Adam6b	NM_001009545	Mus musculus a disintegrin and metallopeptidase domain 6B (Adam6b), mRNA [NM_001009545]
CUST_14942_PI419772161	0.00223006	15.8899	up	Art1	NM_009710	Mus musculus ADP-ribosyltransferase 1 (Art1), mRNA [NM_009710]
CUST_809_PI419772161	0.00198787	15.8898	up	Lce1c	NM_028622	Mus musculus late cornified envelope 1C (Lce1c), mRNA [NM_028622]
CUST_9404_PI419772161	0.00222035	15.8841	up	Cyp3a25	NM_019792	Mus musculus cytochrome P450, family 3, subfamily a, polypeptide 25 (Cyp3a25), transcript variant 1, mRNA [NM_019792]
CUST_9610_PI419772161	0.000973976	15.8708	up	Ndst3	NM_031186	Mus musculus N-deacetylase/N-sulfotransferase (heparan glucosaminyl) 3 (Ndst3), mRNA [NM_031186]
CUST_12105_PI419772161	0.00455045	15.852	up	4921509C19Rik	NM_198655	Mus musculus RIKEN cDNA 4921509C19 gene (4921509C19Rik), mRNA [NM_198655]
CUST_2321_PI419772161	0.0163997	15.8076	up	Cylc1	NM_026134	Mus musculus cylicin, basic protein of sperm head cytoskeleton 1 (Cylc1), mRNA [NM_026134]
CUST_3981_PI419772161	0.00284733	15.7322	up	Akr1c19	NM_001013785	Mus musculus aldo-keto reductase family 1, member C19 (Akr1c19), mRNA [NM_001013785]
CUST_18764_PI419772161	0.000768525	15.7122	up	Gm525	NM_001033266	hypothetical protein LOC217071
CUST_6578_PI419772161	0.00185769	15.6682	up	Psca	NM_028216	Mus musculus prostate stem cell antigen (Psca), mRNA [NM_028216]
CUST_5821_PI419772161	0.0174032	15.6602	up	Spag8	NM_001007463	sperm associated antigen 8
CUST_9646_PI419772161	0.000684326	15.6578	up	Fam19a4	NM_177233	Mus musculus family with sequence similarity 19, member A4 (Fam19a4), mRNA [NM_177233]
CUST_16262_PI419772161	0.000101795	15.573	up	Usp2	NM_198092	Mus musculus ubiquitin specific peptidase 2 (Usp2), transcript variant 3, mRNA [NM_198092]
CUST_9757_PI419772161	0.00221554	15.4521	up	Nat8	NM_023455	Mus musculus N-acetyltransferase 8 (GCN5-related, putative) (Nat8), mRNA [NM_023455]
CUST_14022_PI419772161	0.0119521	15.4164	up	Capn8	NM_001145806	Mus musculus calpain 8 (Capn8), transcript variant 2, mRNA [NM_001145806]
CUST_12108_PI419772161	0.0117602	15.4149	up	Ssx9	NM_199063	Mus musculus synovial sarcoma, X breakpoint 9 (Ssx9), mRNA [NM_199063]
CUST_2795_PI419772161	0.00108826	15.4114	up	9530002B09Rik	NM_023865	Mus musculus RIKEN cDNA 9530002B09 gene (9530002B09Rik), mRNA [NM_023865]
CUST_5445_PI419772161	0.00145703	15.3914	up	Defb41	NM_183124	Mus musculus defensin beta 41 (Defb41), mRNA [NM_183124]
CUST_17777_PI419772161	0.0131423	15.3675	up	Naa11	NM_001033191	Mus musculus N(alpha)-acetyltransferase 11, NatA catalytic subunit (Naa11), mRNA [NM_001033191]
CUST_8225_PI419772161	2.42901e-05	15.2259	up	C1qtnf4	NM_026161	Mus musculus C1q and tumor necrosis factor related protein 4 (C1qtnf4), mRNA [NM_026161]
CUST_16820_PI419772161	0.000178204	15.2242	up	1700029J07Rik	NM_001033148	Mus musculus RIKEN cDNA 1700029J07 gene (1700029J07Rik), mRNA [NM_001033148]
CUST_21213_PI419772161	0.000493374	15.1339	up	Agtr1a	NM_177322	Mus musculus angiotensin II receptor, type 1a (Agtr1a), mRNA [NM_177322]
CUST_21552_PI419772161	0.000107505	15.13	up	Fmn1	NM_001043322	formin 1 isoform 2
CUST_22020_PI419772161	0.0355418	15.0884	up	Serpinb9g	NM_011455	Mus musculus serine (or cysteine) peptidase inhibitor, clade B, member 9g (Serpinb9g), mRNA [NM_011455]
CUST_7254_PI419772161	0.000587195	15.083	up	Trim54	NM_021447	Mus musculus tripartite motif-containing 54 (Trim54), mRNA [NM_021447]
CUST_17041_PI419772161	0.00103567	14.9905	up	Irx2	NM_010574	Mus musculus Iroquois related homeobox 2 (Drosophila) (Irx2), mRNA [NM_010574]
CUST_22161_PI419772161	0.00596645	14.9859	up	Spon1	NM_145584	Mus musculus spondin 1, (f-spondin) extracellular matrix protein (Spon1), mRNA [NM_145584]
CUST_13401_PI419772161	7.38335e-05	14.9135	up	Liph	NM_153404	Mus musculus lipase, member H (Liph), transcript variant 2, mRNA [NM_153404]
CUST_7577_PI419772161	0.000306461	14.9103	up	Ppp2r2b	NM_027531	protein phosphatase 2 (formerly 2A), regulatory
CUST_11406_PI419772161	0.00897589	14.8837	up	Nmbr	NM_008703	Mus musculus neuromedin B receptor (Nmbr), mRNA [NM_008703]
CUST_20791_PI419772161	0.0110639	14.8326	up	Calca	NM_001033954	Mus musculus calcitonin/calcitonin-related polypeptide, alpha (Calca), transcript variant 2, mRNA [NM_001033954]
CUST_20734_PI419772161	0.00143167	14.819	up	Tmprss7	NM_172455	Mus musculus transmembrane serine protease 7 (Tmprss7), transcript variant 2, mRNA [NM_172455]
CUST_12241_PI419772161	0.0144365	14.7351	up	Vmn2r58	NM_001105055	Mus musculus vomeronasal 2, receptor 58 (Vmn2r58), mRNA [NM_001105055]
CUST_8914_PI419772161	0.00308127	14.723	up	Acsl6	NM_144823	acyl-CoA synthetase long-chain family member 6
CUST_16848_PI419772161	0.00178572	14.7203	up	4930455F23Rik	NM_029115	Mus musculus RIKEN cDNA 4930455F23 gene (4930455F23Rik), mRNA [NM_029115]
CUST_2830_PI419772161	0.00621201	14.674	up	Best3	NM_001007583	bestrophin 3
CUST_16565_PI419772161	0.00105534	14.6704	up	Kcnu1	NM_008432	Mus musculus potassium channel, subfamily U, member 1 (Kcnu1), mRNA [NM_008432]
CUST_10525_PI419772161	0.000450482	14.6287	up	Abcb9	NM_019875	Mus musculus ATP-binding cassette, sub-family B (MDR/TAP), member 9 (Abcb9), mRNA [NM_019875]
CUST_8782_PI419772161	0.00258828	14.6273	up	Crybg3	NM_174848	Mus musculus beta-gamma crystallin domain containing 3 (Crybg3), mRNA [NM_174848]
CUST_4178_PI419772161	0.000902108	14.6186	up	Zscan10	NM_001033425	Mus musculus zinc finger and SCAN domain containing 10 (Zscan10), mRNA [NM_001033425]
CUST_8844_PI419772161	0.000387221	14.5923	up	Kndc1	NM_177261	Mus musculus kinase non-catalytic C-lobe domain (KIND) containing 1 (Kndc1), mRNA [NM_177261]
CUST_5432_PI419772161	0.000313766	14.5711	up	Usp20	NM_028846	Mus musculus ubiquitin specific peptidase 20 (Usp20), mRNA [NM_028846]
CUST_941_PI419772161	0.00813541	14.5093	up	Spata24	NM_027733	Mus musculus spermatogenesis associated 24 (Spata24), transcript variant 1, mRNA [NM_027733]
CUST_19568_PI419772161	0.00511794	14.5002	up	Trdn	NM_029726	Mus musculus triadin (Trdn), mRNA [NM_029726]
CUST_1824_PI419772161	0.0299227	14.4895	up	Styxl1	NM_029659	Mus musculus serine/threonine/tyrosine interacting-like 1 (Styxl1), mRNA [NM_029659]
CUST_20114_PI419772161	0.000863483	14.4814	up	Wdr78	NM_146254	Mus musculus WD repeat domain 78 (Wdr78), mRNA [NM_146254]
CUST_8921_PI419772161	0.00277984	14.4781	up	Acsl6	NM_001033599	Mus musculus acyl-CoA synthetase long-chain family member 6 (Acsl6), transcript variant 4, mRNA [NM_001033599]
CUST_9072_PI419772161	0.00310966	14.4663	up	Prss2	NM_009430	Mus musculus protease, serine, 2 (Prss2), mRNA [NM_009430]
CUST_14922_PI419772161	0.000207807	14.463	up	Pitx2	NM_001042504	paired-like homeodomain transcription factor 2
CUST_18970_PI419772161	0.00857574	14.4581	up	Gm15386	NM_001040027	defensin beta 17
CUST_10979_PI419772161	0.0245413	14.4561	up	Gcnt7	NM_001039560	glucosaminyl (N-acetyl) transferase family
CUST_9624_PI419772161	0.000952879	14.3826	up	Synj2	NM_011523	Mus musculus synaptojanin 2 (Synj2), transcript variant 3, mRNA [NM_011523]
CUST_5969_PI419772161	0.00172004	14.3691	up	Mtl5	NM_001039658	metallothionein-like 5, testis-specific isoform
CUST_7028_PI419772161	0.00689363	14.304	up	1700001O22Rik	NM_198000	Mus musculus RIKEN cDNA 1700001O22 gene (1700001O22Rik), transcript variant 1, mRNA [NM_198000]
CUST_9832_PI419772161	0.00840569	14.2773	up	Ttll11	NM_028921	tubulin tyrosine ligase-like family, member 11
CUST_8916_PI419772161	0.00450508	14.2734	up	Acsl6	NM_001033597	acyl-CoA synthetase long-chain family member 6
CUST_12408_PI419772161	0.00155941	14.2208	up	Vmn2r16	NM_001104627	vomeronasal 2, receptor 16
CUST_20426_PI419772161	0.00265644	14.2093	up	Tbr1	NM_009322	Mus musculus T-box brain gene 1 (Tbr1), mRNA [NM_009322]
CUST_1565_PI419772161	0.042379	14.2047	up	AI317395	NM_144821	Mus musculus expressed sequence AI317395 (AI317395), mRNA [NM_144821]
CUST_21370_PI419772161	0.00149234	14.1954	up	Dnmt3l	NM_001081695	DNA (cytosine-5-)-methyltransferase 3-like
CUST_13145_PI419772161	3.38254e-05	14.1303	up	Nek4	NM_011849	Mus musculus NIMA (never in mitosis gene a)-related expressed kinase 4 (Nek4), mRNA [NM_011849]
CUST_11350_PI419772161	0.00136332	14.0591	up	Dyrk2	NM_001014390	dual-specificity tyrosine-(Y)-phosphorylation
CUST_13710_PI419772161	0.000272822	13.9641	up	Prdm8	NM_029947	Mus musculus PR domain containing 8 (Prdm8), mRNA [NM_029947]
CUST_19542_PI419772161	0.00219598	13.9445	up	Bscl2	NM_001136064	seipin
CUST_1844_PI419772161	0.0243711	13.9376	up	Pira6	NM_011093	Mus musculus paired-Ig-like receptor A6 (Pira6), transcript variant 2, mRNA [NM_011093]
CUST_17755_PI419772161	0.000335868	13.9227	up	Thsd7b	NM_172485	Mus musculus thrombospondin, type I, domain containing 7B (Thsd7b), mRNA [NM_172485]
CUST_1141_PI419772161	1.54176e-06	13.9173	up	4930481F22Rik	NM_001048145	hypothetical protein LOC668110 isoform 1
CUST_797_PI419772161	0.00212847	13.9137	up	Ssxb1	NM_026492	Mus musculus synovial sarcoma, X member B, breakpoint 1 (Ssxb1), mRNA [NM_026492]
CUST_11268_PI419772161	0.0258908	13.9052	up	1700025E21Rik	NM_029373	Mus musculus RIKEN cDNA 1700025E21 gene (1700025E21Rik), mRNA [NM_029373]
CUST_1886_PI419772161	0.000846046	13.8938	up	Epsti1	NM_029495	Mus musculus epithelial stromal interaction 1 (breast) (Epsti1), transcript variant a, mRNA [NM_029495]
CUST_7189_PI419772161	0.00305362	13.8908	up	Epyc	NM_007884	Mus musculus epiphycan (Epyc), mRNA [NM_007884]
CUST_3_PI419772161	0.001061	13.8768	up	Pira4	NM_011091	paired-Ig-like receptor A4
CUST_21693_PI419772161	0.000262194	13.8379	up	Slc12a3	NM_019415	Mus musculus solute carrier family 12, member 3 (Slc12a3), mRNA [NM_019415]
CUST_21549_PI419772161	0.00130646	13.8129	up	Fmn1	NM_010230	Mus musculus formin 1 (Fmn1), transcript variant 1, mRNA [NM_010230]
CUST_18846_PI419772161	0.00128001	13.8091	up	Gm884	NM_001033434	hypothetical protein LOC380730
CUST_8331_PI419772161	0.0168558	13.8056	up	Spata21	NM_177867	Mus musculus spermatogenesis associated 21 (Spata21), mRNA [NM_177867]
CUST_16880_PI419772161	0.00115898	13.7961	up	Cmklr1	NM_008153	Mus musculus chemokine-like receptor 1 (Cmklr1), mRNA [NM_008153]
CUST_22318_PI419772161	0.00830229	13.7457	up	Kcnh5	NM_172805	Mus musculus potassium voltage-gated channel, subfamily H (eag-related), member 5 (Kcnh5), mRNA [NM_172805]
CUST_14708_PI419772161	0.000261329	13.6302	up	Acot7	NM_001146057	acyl-CoA thioesterase 7 isoform 1
CUST_12607_PI419772161	0.00535159	13.6228	up	Trhde	NM_146241	Mus musculus TRH-degrading enzyme (Trhde), mRNA [NM_146241]
CUST_7020_PI419772161	0.00988759	13.6216	up	L3mbtl	NM_001081338	l(3)mbt-like
CUST_982_PI419772161	8.59495e-05	13.6139	up	Pwwp2b	NM_001098636	PWWP domain containing 2 isoform 1
CUST_78_PI419772161	0.000315877	13.5879	up	1190005I06Rik	NM_197988	Mus musculus RIKEN cDNA 1190005I06 gene (1190005I06Rik), mRNA [NM_197988]
CUST_14709_PI419772161	0.000107045	13.5216	up	Acot7	NM_001146058	acyl-CoA thioesterase 7 isoform 3
CUST_7333_PI419772161	0.00379414	13.5122	up	Iqch	NM_030068	Mus musculus IQ motif containing H (Iqch), mRNA [NM_030068]
CUST_11771_PI419772161	0.00785184	13.4874	up	Ubxn11	NM_026257	Mus musculus UBX domain protein 11 (Ubxn11), mRNA [NM_026257]
CUST_5473_PI419772161	0.0200063	13.4863	up	Olfr183	NM_146485	Mus musculus olfactory receptor 183 (Olfr183), mRNA [NM_146485]
CUST_14591_PI419772161	0.00350509	13.4638	up	Zpbp	NM_015785	Mus musculus zona pellucida binding protein (Zpbp), mRNA [NM_015785]
CUST_362_PI419772161	0.0200501	13.4597	up	Wdr27	NM_175173	Mus musculus WD repeat domain 27 (Wdr27), mRNA [NM_175173]
CUST_21505_PI419772161	0.00285528	13.445	up	Dnmt3l	NM_019448	Mus musculus DNA (cytosine-5-)-methyltransferase 3-like (Dnmt3l), transcript variant 1, mRNA [NM_019448]
CUST_8465_PI419772161	0.00260262	13.3487	up	Defb14	NM_183026	Mus musculus defensin beta 14 (Defb14), mRNA [NM_183026]
CUST_655_PI419772161	0.000561314	13.3227	up	Tmf1	NM_001081111	Mus musculus TATA element modulatory factor 1 (Tmf1), mRNA [NM_001081111]
CUST_9388_PI419772161	0.00414635	13.3152	up	Trpm6	NM_153417	Mus musculus transient receptor potential cation channel, subfamily M, member 6 (Trpm6), mRNA [NM_153417]
CUST_1597_PI419772161	0.00941999	13.302	up	Tmem45b	NM_144936	Mus musculus transmembrane protein 45b (Tmem45b), mRNA [NM_144936]
CUST_15084_PI419772161	0.00791599	13.261	up	Dnajb14	NM_001033155	Mus musculus DnaJ (Hsp40) homolog, subfamily B, member 14 (Dnajb14), mRNA [NM_001033155]
CUST_15420_PI419772161	5.3228e-05	13.2307	up	1700112E06Rik	NM_028275	Mus musculus RIKEN cDNA 1700112E06 gene (1700112E06Rik), mRNA [NM_028275]
CUST_3713_PI419772161	0.000233957	13.1769	up	Hist2h2aa1	NM_013549	Mus musculus histone cluster 2, H2aa1 (Hist2h2aa1), mRNA [NM_013549]
CUST_18028_PI419772161	0.000462627	13.1594	up	Klra8	NM_010650	Mus musculus killer cell lectin-like receptor, subfamily A, member 8 (Klra8), transcript variant 2, mRNA [NM_010650]
CUST_16151_PI419772161	0.00259152	13.1449	up	Chl1	NM_007697	Mus musculus cell adhesion molecule with homology to L1CAM (Chl1), mRNA [NM_007697]
CUST_12252_PI419772161	0.0023499	13.144	up	Epgn	NM_053087	Mus musculus epithelial mitogen (Epgn), mRNA [NM_053087]
CUST_4831_PI419772161	0.000617816	13.122	up	Ribc1	NM_025660	Mus musculus RIB43A domain with coiled-coils 1 (Ribc1), mRNA [NM_025660]
CUST_8918_PI419772161	0.00523322	13.1124	up	Acsl6	NM_001033598	acyl-CoA synthetase long-chain family member 6
CUST_18243_PI419772161	0.000756535	13.0644	up	Tesk1	NM_011571	Mus musculus testis specific protein kinase 1 (Tesk1), mRNA [NM_011571]
CUST_16564_PI419772161	0.00256893	13.0439	up	Ptpdc1	NM_207232	Mus musculus protein tyrosine phosphatase domain containing 1 (Ptpdc1), mRNA [NM_207232]
CUST_18860_PI419772161	0.00151575	13.0334	up	Gm595	NM_001085499	hypothetical protein LOC209005
CUST_21448_PI419772161	0.0407391	12.9412	up	Pax6	NM_013627	Mus musculus paired box gene 6 (Pax6), mRNA [NM_013627]
CUST_7087_PI419772161	0.0087828	12.9371	up	Dmrtc2	NM_027732	Mus musculus doublesex and mab-3 related transcription factor like family C2 (Dmrtc2), mRNA [NM_027732]
CUST_18273_PI419772161	0.00214698	12.9113	up	Gm16367	NM_001031622	Mus musculus predicted gene 16367 (Gm16367), mRNA [NM_001031622]
CUST_20916_PI419772161	2.24351e-05	12.9068	up	Crem	NM_001110859	cAMP responsive element modulator isoform 1
CUST_747_PI419772161	0.000564055	12.9054	up	4930453N24Rik	NM_026273	Mus musculus RIKEN cDNA 4930453N24 gene (4930453N24Rik), mRNA [NM_026273]
CUST_1588_PI419772161	0.00802498	12.9025	up	Cdc42ep3	NM_026514	Mus musculus CDC42 effector protein (Rho GTPase binding) 3 (Cdc42ep3), mRNA [NM_026514]
CUST_2917_PI419772161	0.00572472	12.8769	up	4930595M18Rik	NM_173435	Mus musculus RIKEN cDNA 4930595M18 gene (4930595M18Rik), mRNA [NM_173435]
CUST_7543_PI419772161	0.00121524	12.8727	up	Ppp2r2b	NM_028392	Mus musculus protein phosphatase 2 (formerly 2A), regulatory subunit B (PR 52), beta isoform (Ppp2r2b), transcript variant 2, mRNA [NM_028392]
CUST_2697_PI419772161	0.00187504	12.8577	up	Tmem194	NM_001113211	Mus musculus transmembrane protein 194 (Tmem194), transcript variant 1, mRNA [NM_001113211]
CUST_132_PI419772161	0.000617362	12.8456	up	Spata2L	NM_030176	Mus musculus spermatogenesis associated 2-like (Spata2L), mRNA [NM_030176]
CUST_5332_PI419772161	0.00117418	12.8061	up	Igbp1b	NM_015777	Mus musculus immunoglobulin (CD79A) binding protein 1b (Igbp1b), mRNA [NM_015777]
CUST_251_PI419772161	0.00176451	12.7629	up	Filip1	NM_001081243	Mus musculus filamin A interacting protein 1 (Filip1), mRNA [NM_001081243]
CUST_8510_PI419772161	0.000128788	12.7114	up	Cst8	NM_009978	Mus musculus cystatin 8 (cystatin-related epididymal spermatogenic) (Cst8), mRNA [NM_009978]
CUST_19623_PI419772161	0.000988756	12.6683	up	Tmem116	NM_001161627	transmembrane protein 116 isoform 1
CUST_8011_PI419772161	0.000893579	12.668	up	Pcbp3	NM_021568	Mus musculus poly(rC) binding protein 3 (Pcbp3), mRNA [NM_021568]
CUST_130_PI419772161	0.0115855	12.6458	up	Larp1b	NM_001040399	Mus musculus La ribonucleoprotein domain family, member 1B (Larp1b), mRNA [NM_001040399]
CUST_1836_PI419772161	0.00312105	12.6	up	Syt10	NM_018803	Mus musculus synaptotagmin X (Syt10), mRNA [NM_018803]
CUST_11109_PI419772161	0.0124269	12.5695	up	Krt73	NM_212485	keratin 73
CUST_21735_PI419772161	0.00517007	12.5088	up	Pkd2l2	NM_016927	Mus musculus polycystic kidney disease 2-like 2 (Pkd2l2), transcript variant 1, mRNA [NM_016927]
CUST_18240_PI419772161	0.00250439	12.5078	up	Svip	NM_001160345	Mus musculus small VCP/p97-interacting protein (Svip), transcript variant 1, mRNA [NM_001160345]
CUST_8085_PI419772161	0.00265138	12.498	up	Celf6	NM_175235	Mus musculus CUGBP, Elav-like family member 6 (Celf6), mRNA [NM_175235]
CUST_8430_PI419772161	0.00335143	12.4846	up	Ccdc62	NM_001134767	coiled-coil domain containing 62
CUST_7706_PI419772161	0.000242663	12.4764	up	Tnfaip2	NM_009396	Mus musculus tumor necrosis factor, alpha-induced protein 2 (Tnfaip2), mRNA [NM_009396]
CUST_13449_PI419772161	0.00234751	12.4626	up	Lrrc24	NM_198119	Mus musculus leucine rich repeat containing 24 (Lrrc24), mRNA [NM_198119]
CUST_14989_PI419772161	0.000132962	12.4541	up	Tram2	NM_177409	Mus musculus translocating chain-associating membrane protein 2 (Tram2), transcript variant 2, mRNA [NM_177409]
CUST_12388_PI419772161	0.0256412	12.4379	up	Slc7a15	NM_177802	Mus musculus solute carrier family 7 (cationic amino acid transporter, y+ system), member 15 (Slc7a15), transcript variant 2, mRNA [NM_177802]
CUST_19601_PI419772161	0.012735	12.4347	up	Brsk1	NM_001003920	BR serine/threonine kinase 1
CUST_17753_PI419772161	0.00407355	12.42	up	Nms	NM_001011684	neuromedin S
CUST_6422_PI419772161	0.00643085	12.3969	up	Elfn2	NM_183141	Mus musculus leucine rich repeat and fibronectin type III, extracellular 2 (Elfn2), mRNA [NM_183141]
CUST_10698_PI419772161	0.00373434	12.3923	up	Ces3	NM_053200	Mus musculus carboxylesterase 3 (Ces3), mRNA [NM_053200]
CUST_9447_PI419772161	0.0132173	12.3617	up	Cyp2d26	NM_029562	Mus musculus cytochrome P450, family 2, subfamily d, polypeptide 26 (Cyp2d26), mRNA [NM_029562]
CUST_2125_PI419772161	0.000776501	12.3452	up	Mlc1	NM_133241	Mus musculus megalencephalic leukoencephalopathy with subcortical cysts 1 homolog (human) (Mlc1), mRNA [NM_133241]
CUST_11741_PI419772161	0.00331085	12.343	up	Ccdc63	NM_183307	Mus musculus coiled-coil domain containing 63 (Ccdc63), mRNA [NM_183307]
CUST_8645_PI419772161	0.00411475	12.3415	up	Prss42	NM_153099	Mus musculus protease, serine, 42 (Prss42), mRNA [NM_153099]
CUST_10358_PI419772161	0.0119099	12.3399	up	Adra1d	NM_013460	Mus musculus adrenergic receptor, alpha 1d (Adra1d), mRNA [NM_013460]
CUST_4513_PI419772161	0.000403479	12.3343	up	BC046331	NM_177673	Mus musculus cDNA sequence BC046331 (BC046331), mRNA [NM_177673]
CUST_16368_PI419772161	0.000903057	12.3104	up	Chst1	NM_023850	Mus musculus carbohydrate (keratan sulfate Gal-6) sulfotransferase 1 (Chst1), mRNA [NM_023850]
CUST_7957_PI419772161	0.000751527	12.2527	up	Slc8a2	NM_148946	Mus musculus solute carrier family 8 (sodium/calcium exchanger), member 2 (Slc8a2), mRNA [NM_148946]
CUST_7963_PI419772161	0.00122412	12.233	up	Dnajb6	NM_001037941	Mus musculus DnaJ (Hsp40) homolog, subfamily B, member 6 (Dnajb6), transcript variant 2, mRNA [NM_001037941]
CUST_6452_PI419772161	0.00163827	12.2272	up	Ero1lb	NM_026184	Mus musculus ERO1-like beta (S. cerevisiae) (Ero1lb), mRNA [NM_026184]
CUST_7261_PI419772161	0.0382894	12.2012	up	Phactr3	NM_001007154	phosphatase and actin regulator 3 isoform 2
CUST_18424_PI419772161	0.0193116	12.1597	up	Reep6	NM_139292	Mus musculus receptor accessory protein 6 (Reep6), mRNA [NM_139292]
CUST_16859_PI419772161	0.00224268	12.1374	up	Pde1c	NM_001159955	phosphodiesterase 1C isoform g
CUST_7344_PI419772161	0.000387901	12.1263	up	Tprn	NM_175286	Mus musculus taperin (Tprn), mRNA [NM_175286]
CUST_7052_PI419772161	0.0119782	12.1157	up	Ccdc135	NM_001042715	Mus musculus coiled-coil domain containing 135 (Ccdc135), mRNA [NM_001042715]
CUST_20319_PI419772161	0.00188998	12.1038	up	Fasl	NM_010177	Mus musculus Fas ligand (TNF superfamily, member 6) (Fasl), mRNA [NM_010177]
CUST_9868_PI419772161	0.00503202	12.0971	up	Dgka	NM_016811	Mus musculus diacylglycerol kinase, alpha (Dgka), mRNA [NM_016811]
CUST_14580_PI419772161	0.000871027	12.0971	up	Ntn5	NM_001033356	Mus musculus netrin 5 (Ntn5), mRNA [NM_001033356]
CUST_6294_PI419772161	0.000828984	12.0713	up	Cklf	NM_029295	Mus musculus chemokine-like factor (Cklf), transcript variant 1, mRNA [NM_029295]
CUST_22239_PI419772161	0.000630396	12.0675	up	Stk32b	NM_022416	Mus musculus serine/threonine kinase 32B (Stk32b), mRNA [NM_022416]
CUST_15177_PI419772161	0.00538051	12.0525	up	Olig1	NM_016968	Mus musculus oligodendrocyte transcription factor 1 (Olig1), mRNA [NM_016968]
CUST_15396_PI419772161	0.00120725	12.0119	up	Mypn	NM_182992	Mus musculus myopalladin (Mypn), mRNA [NM_182992]
CUST_20528_PI419772161	0.000779863	12.0036	up	Kcnj1	NM_019659	Mus musculus potassium inwardly-rectifying channel, subfamily J, member 1 (Kcnj1), transcript variant 2, mRNA [NM_019659]
CUST_6038_PI419772161	0.00596977	11.9846	up	4933407P14Rik	NM_199019	Mus musculus RIKEN cDNA 4933407P14 gene (4933407P14Rik), transcript variant 1, mRNA [NM_199019]
CUST_1759_PI419772161	5.96784e-05	11.9616	up	Zfp574	NM_175477	Mus musculus zinc finger protein 574 (Zfp574), transcript variant 1, mRNA [NM_175477]
CUST_20714_PI419772161	0.00696692	11.9458	up	Tsx	NM_009440	Mus musculus testis specific X-linked gene (Tsx), mRNA [NM_009440]
CUST_18024_PI419772161	0.000487397	11.9208	up	Klra3	NM_010648	Mus musculus killer cell lectin-like receptor, subfamily A, member 3 (Klra3), mRNA [NM_010648]
CUST_17876_PI419772161	0.000825863	11.9154	up	Abcb4	NM_008830	Mus musculus ATP-binding cassette, sub-family B (MDR/TAP), member 4 (Abcb4), mRNA [NM_008830]
CUST_12582_PI419772161	0.000875235	11.8921	up	Rhox3h	NM_001114157	reproductive homeobox 3H
CUST_15760_PI419772161	0.00113685	11.8909	up	Iqcg	NM_178378	Mus musculus IQ motif containing G (Iqcg), mRNA [NM_178378]
CUST_11698_PI419772161	0.00050007	11.8724	up	Wdr54	NM_023790	Mus musculus WD repeat domain 54 (Wdr54), mRNA [NM_023790]
CUST_7785_PI419772161	0.000643966	11.84	up	Mgst2	NM_174995	Mus musculus microsomal glutathione S-transferase 2 (Mgst2), mRNA [NM_174995]
CUST_14945_PI419772161	0.000239038	11.8142	up	Tram2	NM_133252	translocating chain-associating membrane protein
CUST_19738_PI419772161	0.00243451	11.7887	up	Grm1	NM_001114333	glutamate receptor, metabotropic 1 isoform beta
CUST_21425_PI419772161	0.0026989	11.7736	up	Htr3a	NM_013561	5-hydroxytryptamine (serotonin) receptor 3A
CUST_8936_PI419772161	0.00175221	11.7488	up	Dpys	NM_022722	Mus musculus dihydropyrimidinase (Dpys), transcript variant 1, mRNA [NM_022722]
CUST_13898_PI419772161	0.0016099	11.7362	up	Htr2c	NM_008312	Mus musculus 5-hydroxytryptamine (serotonin) receptor 2C (Htr2c), mRNA [NM_008312]
CUST_18985_PI419772161	0.000381831	11.6939	up	Gm10220	NM_001134299	Mus musculus predicted gene 10220 (Gm10220), mRNA [NM_001134299]
CUST_8586_PI419772161	0.00422214	11.6414	up	Rtn4rl2	NM_199223	Mus musculus reticulon 4 receptor-like 2 (Rtn4rl2), mRNA [NM_199223]
CUST_6800_PI419772161	0.00546831	11.6243	up	Rab11fip5	NM_177466	RAB11 family interacting protein 5 (class I)
CUST_22083_PI419772161	0.00216372	11.6082	up	Plxdc1	NM_028199	Mus musculus plexin domain containing 1 (Plxdc1), transcript variant 2, mRNA [NM_028199]
CUST_14567_PI419772161	0.000698272	11.5963	up	Fgf21	NM_020013	Mus musculus fibroblast growth factor 21 (Fgf21), mRNA [NM_020013]
CUST_17871_PI419772161	0.00125562	11.5874	up	Klra8	NM_001101620	killer cell lectin-like receptor, subfamily A,
CUST_6313_PI419772161	0.00155944	11.5815	up	Zbtb3	NM_001098237	zinc finger and BTB domain containing 3
CUST_19616_PI419772161	0.00143731	11.5652	up	Tmem116	NM_029912	Mus musculus transmembrane protein 116 (Tmem116), transcript variant 3, mRNA [NM_029912]
CUST_17221_PI419772161	0.000145571	11.5193	up	Slc39a4	NM_028064	Mus musculus solute carrier family 39 (zinc transporter), member 4 (Slc39a4), mRNA [NM_028064]
CUST_5799_PI419772161	0.00537231	11.4996	up	Zfp354b	NM_013744	Mus musculus zinc finger protein 354B (Zfp354b), mRNA [NM_013744]
CUST_8359_PI419772161	0.0016297	11.4821	up	Dnajc27	NM_153082	Mus musculus DnaJ (Hsp40) homolog, subfamily C, member 27 (Dnajc27), mRNA [NM_153082]
CUST_11464_PI419772161	0.000265461	11.4764	up	Zfp458	NM_001001152	Mus musculus zinc finger protein 458 (Zfp458), mRNA [NM_001001152]
CUST_20008_PI419772161	0.0143507	11.4746	up	Lef1	NM_010703	Mus musculus lymphoid enhancer binding factor 1 (Lef1), mRNA [NM_010703]
CUST_12995_PI419772161	0.000777404	11.4661	up	Rsph3a	NM_025789	Mus musculus radial spoke 3A homolog (Chlamydomonas) (Rsph3a), mRNA [NM_025789]
CUST_6911_PI419772161	0.00234274	11.428	up	Rshl2b	NM_001083945	radial spokehead-like 2B
CUST_11502_PI419772161	0.00270517	11.4263	up	Skint3	NM_177578	Mus musculus selection and upkeep of intraepithelial T cells 3 (Skint3), transcript variant 2, mRNA [NM_177578]
CUST_17475_PI419772161	0.00347181	11.4065	up	Lgr6	NM_001033409	Mus musculus leucine-rich repeat-containing G protein-coupled receptor 6 (Lgr6), mRNA [NM_001033409]
CUST_8905_PI419772161	0.000214179	11.4	up	Dnahc2	NM_001081330	Mus musculus dynein, axonemal, heavy chain 2 (Dnahc2), mRNA [NM_001081330]
CUST_719_PI419772161	0.00435318	11.3789	up	4930503E14Rik	NM_029131	Mus musculus RIKEN cDNA 4930503E14 gene (4930503E14Rik), mRNA [NM_029131]
CUST_981_PI419772161	0.000165501	11.3696	up	Pwwp2b	NM_001033206	PWWP domain containing 2 isoform 2
CUST_14916_PI419772161	0.000159206	11.342	up	Pitx2	NM_011098	paired-like homeodomain transcription factor 2
CUST_20911_PI419772161	0.000686652	11.3374	up	Crem	NM_001110858	cAMP responsive element modulator isoform 6
CUST_9230_PI419772161	0.00283719	11.3373	up	Fam179a	NM_177087	Mus musculus family with sequence similarity 179, member A (Fam179a), mRNA [NM_177087]
CUST_22348_PI419772161	0.0119833	11.3321	up	Wisp2	NM_016873	Mus musculus WNT1 inducible signaling pathway protein 2 (Wisp2), mRNA [NM_016873]
CUST_18302_PI419772161	0.000134285	11.3267	up	Odc1	NM_013614	Mus musculus ornithine decarboxylase, structural 1 (Odc1), mRNA [NM_013614]
CUST_6740_PI419772161	0.0051288	11.3252	up	Sectm1a	NM_145373	Mus musculus secreted and transmembrane 1A (Sectm1a), mRNA [NM_145373]
CUST_9921_PI419772161	0.00206977	11.3008	up	Bean	NM_001141925	brain expressed, associated with Nedd4 isoform
CUST_20273_PI419772161	0.000144812	11.2849	up	Ttll3	NM_133923	tubulin tyrosine ligase-like family, member 3
CUST_7447_PI419772161	0.00503287	11.2702	up	Gp1bb	NM_010327	glycoprotein Ib, beta polypeptide isoform 2
CUST_9920_PI419772161	0.00291177	11.265	up	Bean	NM_001141924	brain expressed, associated with Nedd4 isoform
CUST_19104_PI419772161	0.0344339	11.2464	up	Gm5136	NM_203660	C6.1A-like
CUST_7474_PI419772161	0.00935242	11.2135	up	677156	NM_001100187	predicted gene, 677156
CUST_22364_PI419772161	0.00906014	11.2126	up	Marveld3	NM_028584	Mus musculus MARVEL (membrane-associating) domain containing 3 (Marveld3), transcript variant 1, mRNA [NM_028584]
CUST_7194_PI419772161	0.00308679	11.2102	up	Ntsr2	NM_008747	Mus musculus neurotensin receptor 2 (Ntsr2), mRNA [NM_008747]
CUST_2190_PI419772161	0.0242571	11.1974	up	Muc15	NM_172979	Mus musculus mucin 15 (Muc15), mRNA [NM_172979]
CUST_8484_PI419772161	0.0176415	11.1949	up	Pramel7	NM_178250	Mus musculus preferentially expressed antigen in melanoma like 7 (Pramel7), mRNA [NM_178250]
CUST_19904_PI419772161	0.00136902	11.1175	up	Ace	NM_009598	Mus musculus angiotensin I converting enzyme (peptidyl-dipeptidase A) 1 (Ace), transcript variant 2, mRNA [NM_009598]
CUST_14135_PI419772161	0.000106217	11.1109	up	Rasgrf1	NM_011245	Mus musculus RAS protein-specific guanine nucleotide-releasing factor 1 (Rasgrf1), transcript variant 1, mRNA [NM_011245]
CUST_7529_PI419772161	0.000374338	11.0635	up	C8g	NM_027062	Mus musculus complement component 8, gamma polypeptide (C8g), mRNA [NM_027062]
CUST_14952_PI419772161	6.66849e-05	11.0623	up	Cox6b2	NM_183406	cytochrome c oxidase subunit VIb polypeptide 2
CUST_18234_PI419772161	0.009807	11.0509	up	Gfi1b	NM_001160406	growth factor independent 1B isoform 2
CUST_20906_PI419772161	0.00151923	11.028	up	Crem	NM_001110857	cAMP responsive element modulator isoform 5
CUST_9691_PI419772161	0.0051699	11.0273	up	Prl2c4	NM_011954	prolactin family 2, subfamily c, member 4
CUST_16885_PI419772161	0.00619957	11.0107	up	Phox2b	NM_008888	Mus musculus paired-like homeobox 2b (Phox2b), mRNA [NM_008888]
CUST_9647_PI419772161	0.0421586	10.9506	up	Ccdc159	NM_025977	Mus musculus coiled-coil domain containing 159 (Ccdc159), transcript variant 2, mRNA [NM_025977]
CUST_4756_PI419772161	6.07329e-05	10.943	up	Zbtb3	NM_133759	Mus musculus zinc finger and BTB domain containing 3 (Zbtb3), transcript variant 2, mRNA [NM_133759]
CUST_15500_PI419772161	0.0163063	10.9304	up	Aqp3	NM_016689	Mus musculus aquaporin 3 (Aqp3), mRNA [NM_016689]
CUST_9942_PI419772161	0.00109935	10.8984	up	Bean	NM_001141922	Mus musculus brain expressed, associated with Nedd4 (Bean), transcript variant 1, mRNA [NM_001141922]
CUST_12167_PI419772161	0.0323291	10.8956	up	Vmn2r85	NM_001102602	vomeronasal 2, receptor 85
CUST_8123_PI419772161	0.00108924	10.8667	up	Bbs1	NM_001033128	Mus musculus Bardet-Biedl syndrome 1 (human) (Bbs1), mRNA [NM_001033128]
CUST_16922_PI419772161	0.00120036	10.8436	up	Dnajb2	NM_178055	DnaJ (Hsp40) homolog, subfamily B, member 2
CUST_11727_PI419772161	7.44017e-06	10.8101	up	Gltpd1	NM_024472	Mus musculus glycolipid transfer protein domain containing 1 (Gltpd1), mRNA [NM_024472]
CUST_10111_PI419772161	0.000619145	10.8093	up	Cep63	NM_001081122	Mus musculus centrosomal protein 63 (Cep63), mRNA [NM_001081122]
CUST_9332_PI419772161	0.0315371	10.7955	up	Tmprss15	NM_008941	Mus musculus transmembrane protease, serine 15 (Tmprss15), transcript variant 1, mRNA [NM_008941]
CUST_897_PI419772161	0.0010396	10.7954	up	Dram1	NM_027878	Mus musculus DNA-damage regulated autophagy modulator 1 (Dram1), mRNA [NM_027878]
CUST_5071_PI419772161	0.0032724	10.7913	up	Zfy2	NM_009571	Mus musculus zinc finger protein 2, Y linked (Zfy2), mRNA [NM_009571]
CUST_17361_PI419772161	0.000291074	10.7899	up	Ghrh	NM_010285	Mus musculus growth hormone releasing hormone (Ghrh), mRNA [NM_010285]
CUST_9445_PI419772161	0.00107139	10.7645	up	Alppl2	NM_007433	Mus musculus alkaline phosphatase, placental-like 2 (Alppl2), mRNA [NM_007433]
CUST_2600_PI419772161	0.00180217	10.7199	up	Hook2	NM_133255	Mus musculus hook homolog 2 (Drosophila) (Hook2), transcript variant 1, mRNA [NM_133255]
CUST_14919_PI419772161	0.00756724	10.7155	up	Pitx2	NM_001042502	Mus musculus paired-like homeodomain transcription factor 2 (Pitx2), transcript variant 3, mRNA [NM_001042502]
CUST_20708_PI419772161	0.0114012	10.6935	up	Tbata	NM_001017433	Mus musculus thymus, brain and testes associated (Tbata), transcript variant 1, mRNA [NM_001017433]
CUST_10156_PI419772161	0.000292823	10.6706	up	Klhdc6	NM_001142724	kelch domain containing 6 isoform 1
CUST_6263_PI419772161	0.000104413	10.6679	up	Cox7b2	NM_030052	Mus musculus cytochrome c oxidase subunit VIIb2 (Cox7b2), mRNA [NM_030052]
CUST_15199_PI419772161	0.00324894	10.6617	up	Bmp5	NM_007555	Mus musculus bone morphogenetic protein 5 (Bmp5), mRNA [NM_007555]
CUST_20870_PI419772161	0.00108592	10.6496	up	Crem	NM_001110854	cAMP responsive element modulator isoform 10
CUST_20229_PI419772161	0.000390896	10.6427	up	Camk4	NM_009793	Mus musculus calcium/calmodulin-dependent protein kinase IV (Camk4), mRNA [NM_009793]
CUST_7346_PI419772161	0.00138204	10.6074	up	Otog	NM_013624	Mus musculus otogelin (Otog), mRNA [NM_013624]
CUST_20877_PI419772161	0.000922554	10.5871	up	Crem	NM_001110855	cAMP responsive element modulator isoform 11
CUST_20849_PI419772161	0.00104021	10.5679	up	Crem	NM_001110850	cAMP responsive element modulator isoform 4
CUST_19621_PI419772161	0.000442602	10.5326	up	Tmem116	NM_001161626	transmembrane protein 116 isoform 2
CUST_12050_PI419772161	0.000524675	10.5082	up	Nckap1l	NM_153505	Mus musculus NCK associated protein 1 like (Nckap1l), mRNA [NM_153505]
CUST_565_PI419772161	0.00204948	10.5041	up	4933411K20Rik	NM_025747	Mus musculus RIKEN cDNA 4933411K20 gene (4933411K20Rik), mRNA [NM_025747]
CUST_721_PI419772161	0.000103978	10.5024	up	AU023871	NM_001033221	Mus musculus expressed sequence AU023871 (AU023871), mRNA [NM_001033221]
CUST_7617_PI419772161	0.00184188	10.4717	up	Rpgrip1	NM_023879	Mus musculus retinitis pigmentosa GTPase regulator interacting protein 1 (Rpgrip1), transcript variant 1, mRNA [NM_023879]
CUST_8429_PI419772161	0.00172286	10.4518	up	4933433C11Rik	NM_028961	Mus musculus RIKEN cDNA 4933433C11 gene (4933433C11Rik), mRNA [NM_028961]
CUST_20768_PI419772161	0.00146193	10.4517	up	Cftr	NM_021050	Mus musculus cystic fibrosis transmembrane conductance regulator homolog (Cftr), mRNA [NM_021050]
CUST_7229_PI419772161	0.00163453	10.4282	up	Rangrf	NM_021329	Mus musculus RAN guanine nucleotide release factor (Rangrf), mRNA [NM_021329]
CUST_7738_PI419772161	0.00667609	10.4041	up	Cerkl	NM_001048176	ceramide kinase-like
CUST_20695_PI419772161	0.000203859	10.3974	up	Slc1a2	NM_001077515	excitatory amino acid transporter 2 isoform 2
CUST_743_PI419772161	0.00691142	10.3909	up	DXBay18	NM_001025384	Mus musculus DNA segment, Chr X, Baylor 18 (DXBay18), mRNA [NM_001025384]
CUST_680_PI419772161	0.00922605	10.3856	up	Stard10	NM_019990	Mus musculus START domain containing 10 (Stard10), mRNA [NM_019990]
CUST_19067_PI419772161	0.00541829	10.3728	up	Gm5465	NM_001034882	hypothetical protein LOC432879
CUST_10811_PI419772161	0.00492734	10.3551	up	Vmn2r22	NM_001104637	vomeronasal receptor Vmn2r22
CUST_7148_PI419772161	0.000617434	10.3353	up	Amn1	NM_001113424	Mus musculus antagonist of mitotic exit network 1 homolog (S. cerevisiae) (Amn1), mRNA [NM_001113424]
CUST_13672_PI419772161	0.000297712	10.3298	up	Mad2l2	NM_027985	Mus musculus MAD2 mitotic arrest deficient-like 2 (yeast) (Mad2l2), mRNA [NM_027985]
CUST_7418_PI419772161	0.00247334	10.3277	up	Camk2n2	NM_028420	Mus musculus calcium/calmodulin-dependent protein kinase II inhibitor 2 (Camk2n2), mRNA [NM_028420]
CUST_18410_PI419772161	0.00131705	10.3086	up	Prnd	NM_001126338	prion protein dublet
CUST_18167_PI419772161	0.00969264	10.3002	up	A830018L16Rik	NM_177173	Mus musculus RIKEN cDNA A830018L16 gene (A830018L16Rik), transcript variant 2, mRNA [NM_177173]
CUST_16941_PI419772161	0.000807062	10.2823	up	Speer4b	NM_028561	Mus musculus spermatogenesis associated glutamate (E)-rich protein 4b (Speer4b), mRNA [NM_028561]
CUST_10250_PI419772161	0.0242835	10.2737	up	Coil	NM_016706	Mus musculus coilin (Coil), mRNA [NM_016706]
CUST_21318_PI419772161	0.00284855	10.2717	up	Cntnap2	NM_001004357	Mus musculus contactin associated protein-like 2 (Cntnap2), transcript variant 1, mRNA [NM_001004357]
CUST_7755_PI419772161	0.0179123	10.2638	up	Phkg2	NM_026888	Mus musculus phosphorylase kinase, gamma 2 (testis) (Phkg2), mRNA [NM_026888]
CUST_21394_PI419772161	0.000242997	10.2469	up	Spsb2	NM_013539	Mus musculus splA/ryanodine receptor domain and SOCS box containing 2 (Spsb2), mRNA [NM_013539]
CUST_9582_PI419772161	0.00594495	10.2292	up	Ugt3a2	NM_144845	Mus musculus UDP glycosyltransferases 3 family, polypeptide A2 (Ugt3a2), mRNA [NM_144845]
CUST_12223_PI419772161	0.0142593	10.2248	up	Ubtd1	NM_145500	Mus musculus ubiquitin domain containing 1 (Ubtd1), mRNA [NM_145500]
CUST_16717_PI419772161	0.00289475	10.2233	up	Zfp819	NM_028913	Mus musculus zinc finger protein 819 (Zfp819), mRNA [NM_028913]
CUST_3182_PI419772161	0.0181293	10.215	up	Krtap13	NM_010671	Mus musculus keratin associated protein 13 (Krtap13), mRNA [NM_010671]
CUST_17737_PI419772161	0.00973095	10.2116	up	Ssxb9	NM_199066	synovial sarcoma, X member B, breakpoint 9
CUST_9572_PI419772161	0.00125279	10.2	up	Aurkc	NM_001080965	aurora kinase C isoform a
CUST_1647_PI419772161	0.000659541	10.1917	up	Cplx4	NM_145493	Mus musculus complexin 4 (Cplx4), mRNA [NM_145493]
CUST_2756_PI419772161	0.0109175	10.1605	up	Lrtm1	NM_176920	Mus musculus leucine-rich repeats and transmembrane domains 1 (Lrtm1), mRNA [NM_176920]
CUST_3245_PI419772161	3.34154e-05	10.15	up	Insl5	NM_011831	Mus musculus insulin-like 5 (Insl5), mRNA [NM_011831]
CUST_15451_PI419772161	0.0144438	10.15	up	Gcet2	NM_008099	Mus musculus germinal center expressed transcript 2 (Gcet2), transcript variant 2, mRNA [NM_008099]
CUST_18789_PI419772161	0.00386293	10.1459	up	Gm973	NM_001013771	hypothetical protein LOC381260
CUST_7073_PI419772161	0.000844987	10.1206	up	Sag	NM_009118	Mus musculus retinal S-antigen (Sag), mRNA [NM_009118]
CUST_20709_PI419772161	0.0283737	10.1203	up	1700021K02Rik	NM_001017419	stromal protein associated with thymii and lymph
CUST_22064_PI419772161	0.00133823	10.0838	up	Cml5	NM_023493	Mus musculus camello-like 5 (Cml5), mRNA [NM_023493]
CUST_181_PI419772161	0.027382	10.0541	up	1600016N20Rik	NM_028050	Mus musculus RIKEN cDNA 1600016N20 gene (1600016N20Rik), mRNA [NM_028050]
CUST_9225_PI419772161	0.000737447	10.0354	up	AI464131	NM_001085515	Mus musculus expressed sequence AI464131 (AI464131), mRNA [NM_001085515]
CUST_7124_PI419772161	0.00772653	10.0205	up	Lyar	NM_025281	Mus musculus Ly1 antibody reactive clone (Lyar), mRNA [NM_025281]
CUST_9855_PI419772161	0.0010853	10.0159	up	Spag1	NM_012031	Mus musculus sperm associated antigen 1 (Spag1), mRNA [NM_012031]
CUST_20812_PI419772161	0.0260432	10.0102	up	Nr1i2	NM_001098404	nuclear receptor subfamily 1, group I, member 2
CUST_20697_PI419772161	0.00531107	9.97611	up	Slc1a2	NM_001077514	Mus musculus solute carrier family 1 (glial high affinity glutamate transporter), member 2 (Slc1a2), transcript variant 1, mRNA [NM_001077514]
CUST_20884_PI419772161	0.00387569	9.96911	up	Crem	NM_001110856	cAMP responsive element modulator isoform 2
CUST_16940_PI419772161	0.0149948	9.95591	up	Pde1a	NM_001009979	phosphodiesterase 1A isoform PDE1A9
CUST_13403_PI419772161	0.00154648	9.94863	up	Slc17a9	NM_183161	Mus musculus solute carrier family 17, member 9 (Slc17a9), mRNA [NM_183161]
CUST_21323_PI419772161	0.0264074	9.9214	up	Cntnap2	NM_025771	Mus musculus contactin associated protein-like 2 (Cntnap2), transcript variant 2, mRNA [NM_025771]
CUST_15452_PI419772161	0.00225473	9.89138	up	Gcet2	NM_001159297	germinal center expressed transcript 2 isoform
CUST_11770_PI419772161	0.00609386	9.89056	up	Ccl28	NM_020279	Mus musculus chemokine (C-C motif) ligand 28 (Ccl28), mRNA [NM_020279]
CUST_210_PI419772161	0.0180562	9.88985	up	BC050777	NM_183181	Mus musculus cDNA sequence BC050777 (BC050777), mRNA [NM_183181]
CUST_5984_PI419772161	0.00450694	9.88568	up	Lrrc25	NM_153074	Mus musculus leucine rich repeat containing 25 (Lrrc25), mRNA [NM_153074]
CUST_19544_PI419772161	0.000690151	9.8664	up	Bscl2	NM_008144	Mus musculus Bernardinelli-Seip congenital lipodystrophy 2 homolog (human) (Bscl2), transcript variant 2, mRNA [NM_008144]
CUST_19189_PI419772161	0.0121929	9.85948	up	Gm4738	NM_144511	Mus musculus predicted gene 4738 (Gm4738), transcript variant 1, mRNA [NM_144511]
CUST_6630_PI419772161	0.0245704	9.84629	up	E330014E10Rik	NM_001122668	hypothetical protein LOC665943
CUST_14752_PI419772161	0.00261721	9.84366	up	Abca12	NM_175210	Mus musculus ATP-binding cassette, sub-family A (ABC1), member 12 (Abca12), mRNA [NM_175210]
CUST_15535_PI419772161	0.00401253	9.84353	up	Hk1	NM_010438	Mus musculus hexokinase 1 (Hk1), nuclear gene encoding mitochondrial protein, transcript variant 2, mRNA [NM_010438]
CUST_9717_PI419772161	0.00164642	9.83807	up	Fam19a3	NM_183224	Mus musculus family with sequence similarity 19, member A3 (Fam19a3), mRNA [NM_183224]
CUST_9129_PI419772161	0.00668385	9.81581	up	Glyctk	NM_001039586	glycerate kinase
CUST_9566_PI419772161	0.000283926	9.81529	up	Pomt1	NM_145145	Mus musculus protein-O-mannosyltransferase 1 (Pomt1), mRNA [NM_145145]
CUST_22337_PI419772161	0.00383528	9.77818	up	Tbx18	NM_023814	Mus musculus T-box18 (Tbx18), mRNA [NM_023814]
CUST_6955_PI419772161	0.000484913	9.77368	up	Shisa3	NM_001033415	shisa homolog 3
CUST_3002_PI419772161	0.0018065	9.76242	up	Klra9	NM_010651	Mus musculus killer cell lectin-like receptor subfamily A, member 9 (Klra9), mRNA [NM_010651]
CUST_4474_PI419772161	0.00355918	9.7557	up	D1Pas1	NM_033077	Mus musculus DNA segment, Chr 1, Pasteur Institute 1 (D1Pas1), mRNA [NM_033077]
CUST_6858_PI419772161	0.0198389	9.75043	up	Kcnip2	NM_145704	Kv channel-interacting protein 2 isoform c
CUST_10265_PI419772161	0.01814	9.74877	up	Slc39a8	NM_001135149	solute carrier family 39 (metal ion
CUST_18168_PI419772161	0.0128974	9.70644	up	A830018L16Rik	NM_001160369	hypothetical protein LOC320492 isoform 1
CUST_14437_PI419772161	0.00755074	9.70316	up	Bfsp2	NM_001002896	Mus musculus beaded filament structural protein 2, phakinin (Bfsp2), mRNA [NM_001002896]
CUST_11027_PI419772161	0.0395841	9.70139	up	Acot12	NM_028790	Mus musculus acyl-CoA thioesterase 12 (Acot12), mRNA [NM_028790]
CUST_11385_PI419772161	0.0149759	9.69903	up	Lphn3	NM_198702	Mus musculus latrophilin 3 (Lphn3), mRNA [NM_198702]
CUST_21422_PI419772161	0.0370617	9.6715	up	Htr3a	NM_001099644	5-hydroxytryptamine (serotonin) receptor 3A
CUST_6799_PI419772161	0.00202347	9.65817	up	Rab11fip5	NM_001003955	Mus musculus RAB11 family interacting protein 5 (class I) (Rab11fip5), transcript variant 1, mRNA [NM_001003955]
CUST_17289_PI419772161	0.0343433	9.64123	up	Sgca	NM_001136080	sarcoglycan, alpha isoform 1
CUST_20863_PI419772161	0.00513726	9.63931	up	Crem	NM_001110853	cAMP responsive element modulator isoform 9
CUST_1362_PI419772161	0.0169386	9.63911	up	Abca17	NM_001031621	Mus musculus ATP-binding cassette, sub-family A (ABC1), member 17 (Abca17), mRNA [NM_001031621]
CUST_9573_PI419772161	0.000757342	9.63163	up	Aurkc	NM_001080966	aurora kinase C isoform b
CUST_1104_PI419772161	0.00309204	9.62576	up	Tmem82	NM_145987	Mus musculus transmembrane protein 82 (Tmem82), mRNA [NM_145987]
CUST_4059_PI419772161	0.00195683	9.61042	up	Ranbp17	NM_023146	Mus musculus RAN binding protein 17 (Ranbp17), mRNA [NM_023146]
CUST_5853_PI419772161	7.20683e-05	9.60178	up	Rcor3	NM_144814	Mus musculus REST corepressor 3 (Rcor3), mRNA [NM_144814]
CUST_22334_PI419772161	0.00449813	9.58396	up	Ccdc151	NM_029939	Mus musculus coiled-coil domain containing 151 (Ccdc151), transcript variant 2, mRNA [NM_029939]
CUST_9041_PI419772161	0.00132175	9.57856	up	Nxn	NM_008750	Mus musculus nucleoredoxin (Nxn), mRNA [NM_008750]
CUST_7644_PI419772161	0.000518973	9.55911	up	Zfp36l3	NM_001009549	Mus musculus zinc finger protein 36, C3H type-like 3 (Zfp36l3), mRNA [NM_001009549]
CUST_3081_PI419772161	0.00303918	9.51755	up	Tmem91	NM_177102	Mus musculus transmembrane protein 91 (Tmem91), mRNA [NM_177102]
CUST_13163_PI419772161	0.000431974	9.50767	up	Serpina1d	NM_009246	Mus musculus serine (or cysteine) peptidase inhibitor, clade A, member 1D (Serpina1d), mRNA [NM_009246]
CUST_11852_PI419772161	0.00164164	9.50376	up	Prg3	NM_016914	Mus musculus proteoglycan 3 (Prg3), mRNA [NM_016914]
CUST_19683_PI419772161	0.0152724	9.48593	up	Cdkn1c	NM_001161624	cyclin-dependent kinase inhibitor 1C isoform 1
CUST_13599_PI419772161	0.00739903	9.48025	up	Dyrk1b	NM_010092	Mus musculus dual-specificity tyrosine-(Y)-phosphorylation regulated kinase 1b (Dyrk1b), transcript variant 2, mRNA [NM_010092]
CUST_4750_PI419772161	0.0139987	9.4749	up	Ang4	NM_177544	Mus musculus angiogenin, ribonuclease A family, member 4 (Ang4), mRNA [NM_177544]
CUST_18408_PI419772161	0.000129367	9.4642	up	Prnd	NM_023043	Mus musculus prion protein dublet (Prnd), transcript variant 1, mRNA [NM_023043]
CUST_9586_PI419772161	0.00131725	9.45635	up	Inpp5j	NM_172439	Mus musculus inositol polyphosphate 5-phosphatase J (Inpp5j), mRNA [NM_172439]
CUST_10732_PI419772161	0.0151196	9.40237	up	Scgn	NM_145399	Mus musculus secretagogin, EF-hand calcium binding protein (Scgn), mRNA [NM_145399]
CUST_943_PI419772161	0.0132151	9.38774	up	1700016K19Rik	NM_198637	Mus musculus RIKEN cDNA 1700016K19 gene (1700016K19Rik), mRNA [NM_198637]
CUST_9125_PI419772161	0.00211243	9.38659	up	Glyctk	NM_174846	Mus musculus glycerate kinase (Glyctk), transcript variant 1, mRNA [NM_174846]
CUST_10915_PI419772161	4.9003e-05	9.38112	up	Srd5a2	NM_053188	Mus musculus steroid 5 alpha-reductase 2 (Srd5a2), mRNA [NM_053188]
CUST_19782_PI419772161	0.0111137	9.37692	up	Insl3	NM_013564	insulin-like 3
CUST_9697_PI419772161	0.0181961	9.32034	up	Prl2c5	NM_181852	Mus musculus prolactin family 2, subfamily c, member 5 (Prl2c5), mRNA [NM_181852]
CUST_5543_PI419772161	0.000565662	9.30926	up	Fkbpl	NM_019873	Mus musculus FK506 binding protein-like (Fkbpl), mRNA [NM_019873]
CUST_43_PI419772161	0.00181164	9.29802	up	Gramd1c	NM_153528	Mus musculus GRAM domain containing 1C (Gramd1c), transcript variant 1, mRNA [NM_153528]
CUST_1005_PI419772161	0.0102276	9.27108	up	C730048C13Rik	NM_177002	Mus musculus RIKEN cDNA C730048C13 gene (C730048C13Rik), mRNA [NM_177002]
CUST_17028_PI419772161	0.00062164	9.26963	up	Proca1	NM_001045516	Mus musculus protein interacting with cyclin A1 (Proca1), mRNA [NM_001045516]
CUST_642_PI419772161	0.0280156	9.23771	up	Defb30	NM_001039566	beta-defensin 30
CUST_475_PI419772161	0.00443036	9.22373	up	Wdr17	NM_028220	Mus musculus WD repeat domain 17 (Wdr17), transcript variant 1, mRNA [NM_028220]
CUST_11776_PI419772161	0.000827264	9.19735	up	Ypel1	NM_023249	Mus musculus yippee-like 1 (Drosophila) (Ypel1), mRNA [NM_023249]
CUST_18248_PI419772161	0.00139386	9.1763	up	Chia	NM_023186	Mus musculus chitinase, acidic (Chia), mRNA [NM_023186]
CUST_18956_PI419772161	0.00401348	9.1755	up	Gm5936	NM_001081670	hypothetical protein LOC546325
CUST_3177_PI419772161	0.00244138	9.17387	up	Nipbl	NM_201232	delangin isoform B
CUST_739_PI419772161	0.0149408	9.17152	up	Ccdc85a	NM_181577	Mus musculus coiled-coil domain containing 85A (Ccdc85a), transcript variant 1, mRNA [NM_181577]
CUST_10501_PI419772161	0.00227559	9.12736	up	Fam107b	NM_025626	Mus musculus family with sequence similarity 107, member B (Fam107b), mRNA [NM_025626]
CUST_16944_PI419772161	0.0392898	9.11575	up	Mogat1	NM_026713	Mus musculus monoacylglycerol O-acyltransferase 1 (Mogat1), mRNA [NM_026713]
CUST_14962_PI419772161	0.000543965	9.10825	up	Csda	NM_139117	cold shock domain protein A long isoform
CUST_17782_PI419772161	0.00525207	9.10684	up	Fcrla	NM_145141	Mus musculus Fc receptor-like A (Fcrla), transcript variant 2, mRNA [NM_145141]
CUST_18817_PI419772161	8.28789e-05	9.09181	up	Gm239	NM_001033333	hypothetical protein LOC237558
CUST_13286_PI419772161	0.000678825	9.08266	up	Ppfia2	NM_177373	Mus musculus protein tyrosine phosphatase, receptor type, f polypeptide (PTPRF), interacting protein (liprin), alpha 2 (Ppfia2), mRNA [NM_177373]
CUST_16098_PI419772161	0.000992216	9.07344	up	Ptpn22	NM_008979	Mus musculus protein tyrosine phosphatase, non-receptor type 22 (lymphoid) (Ptpn22), mRNA [NM_008979]
CUST_18914_PI419772161	0.000137562	9.07198	up	4933408B17Rik	NM_177773	Mus musculus RIKEN cDNA 4933408B17 gene (4933408B17Rik), transcript variant hypothetical protein LOC271508, mRNA [NM_177773]
CUST_5232_PI419772161	0.0465362	9.06617	up	Olfr1336	NM_146915	Mus musculus olfactory receptor 1336 (Olfr1336), mRNA [NM_146915]
CUST_8107_PI419772161	0.000219084	9.06137	up	2810432L12Rik	NM_025944	Mus musculus RIKEN cDNA 2810432L12 gene (2810432L12Rik), mRNA [NM_025944]
CUST_11764_PI419772161	0.000355273	9.0607	up	Cyp24a1	NM_009996	Mus musculus cytochrome P450, family 24, subfamily a, polypeptide 1 (Cyp24a1), nuclear gene encoding mitochondrial protein, mRNA [NM_009996]
CUST_19220_PI419772161	0.00980944	9.05607	up	Gm14459	NM_001126491	hypothetical protein LOC546263
CUST_21490_PI419772161	0.00109215	9.05236	up	C4b	NM_009780	Mus musculus complement component 4B (Childo blood group) (C4b), mRNA [NM_009780]
CUST_13323_PI419772161	0.000535371	9.05013	up	Adrbk2	NM_177078	Mus musculus adrenergic receptor kinase, beta 2 (Adrbk2), transcript variant 1, mRNA [NM_177078]
CUST_19507_PI419772161	0.000274343	9.04455	up	Gtsf1	NM_028797	Mus musculus gametocyte specific factor 1 (Gtsf1), mRNA [NM_028797]
CUST_17470_PI419772161	0.00151846	9.03769	up	Cyct	NM_009989	Mus musculus cytochrome c, testis (Cyct), nuclear gene encoding mitochondrial protein, mRNA [NM_009989]
CUST_6627_PI419772161	0.00357919	9.03411	up	Gp5	NM_008148	Mus musculus glycoprotein 5 (platelet) (Gp5), mRNA [NM_008148]
CUST_18718_PI419772161	0.00158896	9.02798	up	Gm249	NM_001045521	marapsin 2
CUST_742_PI419772161	0.00283295	9.0091	up	Ccdc64b	NM_153784	Mus musculus coiled-coil domain containing 64B (Ccdc64b), mRNA [NM_153784]
CUST_9498_PI419772161	0.0235687	8.98756	up	Fmo3	NM_008030	Mus musculus flavin containing monooxygenase 3 (Fmo3), mRNA [NM_008030]
CUST_16866_PI419772161	0.00280903	8.98334	up	Ccdc150	NM_030025	Mus musculus coiled-coil domain containing 150 (Ccdc150), mRNA [NM_030025]
CUST_14744_PI419772161	0.00234208	8.96641	up	Mepe	NM_053172	Mus musculus matrix extracellular phosphoglycoprotein with ASARM motif (bone) (Mepe), mRNA [NM_053172]
CUST_9143_PI419772161	0.0212886	8.94663	up	Nat3	NM_008674	Mus musculus N-acetyltransferase 3 (Nat3), mRNA [NM_008674]
CUST_4369_PI419772161	0.0230035	8.92934	up	Olfr215	NM_146446	Mus musculus olfactory receptor 215 (Olfr215), mRNA [NM_146446]
CUST_236_PI419772161	0.00334675	8.92242	up	OTTMUSG00000017677	NM_001025383	hypothetical protein LOC574404
CUST_5701_PI419772161	0.000425654	8.88971	up	Cklf	NM_001037841	chemokine-like factor isoform 4
CUST_19624_PI419772161	0.000315534	8.8808	up	Cpn1	NM_030703	Mus musculus carboxypeptidase N, polypeptide 1 (Cpn1), mRNA [NM_030703]
CUST_9051_PI419772161	0.00386423	8.88026	up	Got1l1	NM_029674	Mus musculus glutamic-oxaloacetic transaminase 1-like 1 (Got1l1), mRNA [NM_029674]
CUST_16771_PI419772161	0.000579603	8.8614	up	Kpna7	NM_001013774	importin alpha 2
CUST_20087_PI419772161	0.00183051	8.85344	up	Slc5a9	NM_145551	Mus musculus solute carrier family 5 (sodium/glucose cotransporter), member 9 (Slc5a9), mRNA [NM_145551]
CUST_21439_PI419772161	0.0189819	8.84913	up	Nkx6-1	NM_144955	Mus musculus NK6 homeobox 1 (Nkx6-1), mRNA [NM_144955]
CUST_19083_PI419772161	0.0278951	8.8462	up	Gm14920	NM_001102665	Mus musculus predicted pseudogene 14920 (Gm14920), mRNA [NM_001102665]
CUST_5083_PI419772161	0.015423	8.83655	up	Olfr357	NM_146623	Mus musculus olfactory receptor 357 (Olfr357), mRNA [NM_146623]
CUST_9107_PI419772161	0.00975903	8.81029	up	Hipk4	NM_001033315	Mus musculus homeodomain interacting protein kinase 4 (Hipk4), mRNA [NM_001033315]
CUST_8299_PI419772161	0.000150415	8.79323	up	Ubl7	NM_001122873	ubiquitin-like 7
CUST_7498_PI419772161	0.000205237	8.7899	up	Morn4	NM_198108	Mus musculus MORN repeat containing 4 (Morn4), mRNA [NM_198108]
CUST_2271_PI419772161	0.00181161	8.78716	up	Sfrs14	NM_172755	Mus musculus splicing factor, arginine/serine-rich 14 (Sfrs14), transcript variant 2, mRNA [NM_172755]
CUST_12666_PI419772161	0.0185486	8.78654	up	Vmn2r67	NM_001102579	vomeronasal receptor Vmn2r67
CUST_10719_PI419772161	0.000638409	8.77588	up	Capsl	NM_029341	Mus musculus calcyphosine-like (Capsl), mRNA [NM_029341]
CUST_16721_PI419772161	0.000656533	8.76951	up	Fam187b	NM_175240	Mus musculus family with sequence similarity 187, member B (Fam187b), mRNA [NM_175240]
CUST_15581_PI419772161	0.00275649	8.76879	up	Apba1	NM_177034	Mus musculus amyloid beta (A4) precursor protein binding, family A, member 1 (Apba1), mRNA [NM_177034]
CUST_114_PI419772161	0.00462144	8.75704	up	AK129341	NM_001045524	Mus musculus cDNA sequence AK129341 (AK129341), mRNA [NM_001045524]
CUST_4174_PI419772161	0.00160541	8.75694	up	Mea1	NM_010787	Mus musculus male enhanced antigen 1 (Mea1), mRNA [NM_010787]
CUST_4586_PI419772161	0.00817624	8.75098	up	Olfr301	NM_212436	olfactory receptor 301
CUST_19340_PI419772161	0.0143113	8.74422	up	Pax9	NM_011041	Mus musculus paired box gene 9 (Pax9), mRNA [NM_011041]
CUST_17747_PI419772161	0.017917	8.74055	up	Fcrla	NM_001160215	Fc receptor homolog expressed in B cells isoform
CUST_887_PI419772161	0.00916015	8.73558	up	EG545391	NM_001034899	hypothetical protein LOC545391
CUST_8526_PI419772161	0.000500264	8.72575	up	Tulp2	NM_008807	Mus musculus tubby-like protein 2 (Tulp2), transcript variant 1, mRNA [NM_008807]
CUST_995_PI419772161	0.00022039	8.72207	up	Eno4	NM_178689	Mus musculus enolase 4 (Eno4), mRNA [NM_178689]
CUST_12820_PI419772161	0.0120744	8.711	up	Arpp21	NM_033264	Mus musculus cyclic AMP-regulated phosphoprotein, 21 (Arpp21), transcript variant 2, mRNA [NM_033264]
CUST_13551_PI419772161	0.00421862	8.70592	up	Hes3	NM_008237	Mus musculus hairy and enhancer of split 3 (Drosophila) (Hes3), mRNA [NM_008237]
CUST_18274_PI419772161	0.0045162	8.70094	up	Dak	NM_145496	Mus musculus dihydroxyacetone kinase 2 homolog (yeast) (Dak), mRNA [NM_145496]
CUST_2837_PI419772161	0.00231544	8.69092	up	Pira11	NM_011088	paired-Ig-like receptor A11
CUST_11529_PI419772161	0.00029956	8.68447	up	Tmem97	NM_133706	Mus musculus transmembrane protein 97 (Tmem97), mRNA [NM_133706]
CUST_9155_PI419772161	0.0120359	8.68417	up	Ces1	NM_021456	Mus musculus carboxylesterase 1 (Ces1), mRNA [NM_021456]
CUST_12119_PI419772161	0.00112338	8.67974	up	Baz2b	NM_001001182	Mus musculus bromodomain adjacent to zinc finger domain, 2B (Baz2b), mRNA [NM_001001182]
CUST_16188_PI419772161	0.000736897	8.66228	up	Nphp1	NM_016902	Mus musculus nephronophthisis 1 (juvenile) homolog (human) (Nphp1), mRNA [NM_016902]
CUST_15426_PI419772161	0.0191391	8.62794	up	BC089597	NM_145424	Mus musculus cDNA sequence BC089597 (BC089597), mRNA [NM_145424]
CUST_17748_PI419772161	0.00104937	8.62201	up	Guca2a	NM_008190	Mus musculus guanylate cyclase activator 2a (guanylin) (Guca2a), mRNA [NM_008190]
CUST_14024_PI419772161	0.0417562	8.60201	up	Fam5c	NM_001145807	family with sequence similarity 5, member C
CUST_21668_PI419772161	0.0110146	8.59695	up	Rnase10	NM_029145	Mus musculus ribonuclease, RNase A family, 10 (non-active) (Rnase10), transcript variant 1, mRNA [NM_029145]
CUST_11596_PI419772161	0.00849123	8.55074	up	Tectb	NM_009348	Mus musculus tectorin beta (Tectb), mRNA [NM_009348]
CUST_21692_PI419772161	0.000135906	8.54641	up	Klhl32	NM_001033531	Mus musculus kelch-like 32 (Drosophila) (Klhl32), transcript variant 2, mRNA [NM_001033531]
CUST_12432_PI419772161	0.00472015	8.54593	up	Pfn4	NM_028376	Mus musculus profilin family, member 4 (Pfn4), mRNA [NM_028376]
CUST_5430_PI419772161	0.00131988	8.52603	up	Tspyl4	NM_030203	Mus musculus TSPY-like 4 (Tspyl4), mRNA [NM_030203]
CUST_1531_PI419772161	0.0263534	8.49525	up	Scgb1c1	NM_001099742	Mus musculus secretoglobin, family 1C, member 1 (Scgb1c1), mRNA [NM_001099742]
CUST_2489_PI419772161	0.00709826	8.49513	up	Reg3a	NM_011259	Mus musculus regenerating islet-derived 3 alpha (Reg3a), mRNA [NM_011259]
CUST_21938_PI419772161	0.00232845	8.49119	up	Sema4a	NM_013658	Mus musculus sema domain, immunoglobulin domain (Ig), transmembrane domain (TM) and short cytoplasmic domain, (semaphorin) 4A (Sema4a), transcript variant 1, mRNA [NM_013658]
CUST_275_PI419772161	0.00314125	8.49101	up	2200002J24Rik	NM_026961	Mus musculus RIKEN cDNA 2200002J24 gene (2200002J24Rik), mRNA [NM_026961]
CUST_17472_PI419772161	0.000455789	8.48984	up	Fstl5	NM_178673	Mus musculus follistatin-like 5 (Fstl5), mRNA [NM_178673]
CUST_21618_PI419772161	0.0368231	8.48051	up	Psg18	NM_011963	Mus musculus pregnancy specific glycoprotein 18 (Psg18), transcript variant 1, mRNA [NM_011963]
CUST_11678_PI419772161	0.0116879	8.44665	up	4933425L06Rik	NM_025751	Mus musculus RIKEN cDNA 4933425L06 gene (4933425L06Rik), mRNA [NM_025751]
CUST_12213_PI419772161	0.00166294	8.43753	up	1500002O20Rik	NM_028047	Mus musculus RIKEN cDNA 1500002O20 gene (1500002O20Rik), mRNA [NM_028047]
CUST_17990_PI419772161	0.00326308	8.43309	up	Agtr1b	NM_175086	Mus musculus angiotensin II receptor, type 1b (Agtr1b), mRNA [NM_175086]
CUST_12657_PI419772161	0.000820557	8.40427	up	Ascl3	NM_020051	Mus musculus achaete-scute complex homolog 3 (Drosophila) (Ascl3), mRNA [NM_020051]
CUST_10816_PI419772161	0.0110319	8.39442	up	Vmn2r25	NM_001104641	vomeronasal receptor Vmn2r25
CUST_14297_PI419772161	0.0028393	8.385	up	Tcfl5	NM_178254	Mus musculus transcription factor-like 5 (basic helix-loop-helix) (Tcfl5), mRNA [NM_178254]
CUST_16526_PI419772161	0.00277625	8.36974	up	Clca4	NM_139148	Mus musculus chloride channel calcium activated 4 (Clca4), mRNA [NM_139148]
CUST_6222_PI419772161	0.00174884	8.34281	up	Nlrp9b	NM_194058	Mus musculus NLR family, pyrin domain containing 9B (Nlrp9b), mRNA [NM_194058]
CUST_7495_PI419772161	0.0120363	8.29647	up	Lrrc66	NM_153568	Mus musculus leucine rich repeat containing 66 (Lrrc66), mRNA [NM_153568]
CUST_12765_PI419772161	0.0144292	8.2782	up	Pyy	NM_145435	Mus musculus peptide YY (Pyy), mRNA [NM_145435]
CUST_19192_PI419772161	0.0180767	8.26528	up	Gm4738	NM_001159415	esterase 31-like isoform 2
CUST_15702_PI419772161	0.00765323	8.24042	up	Chrna2	NM_144803	Mus musculus cholinergic receptor, nicotinic, alpha polypeptide 2 (neuronal) (Chrna2), mRNA [NM_144803]
CUST_6676_PI419772161	0.00361115	8.23753	up	Trim46	NM_001039466	tripartite motif protein 46 isoform 3
CUST_2143_PI419772161	0.00260751	8.2339	up	St8sia3	NM_009182	Mus musculus ST8 alpha-N-acetyl-neuraminide alpha-2,8-sialyltransferase 3 (St8sia3), mRNA [NM_009182]
CUST_20586_PI419772161	0.00316306	8.22179	up	Pvrl3	NM_021495	Mus musculus poliovirus receptor-related 3 (Pvrl3), transcript variant alpha, mRNA [NM_021495]
CUST_12383_PI419772161	0.0499424	8.20614	up	Vmn2r14	NM_001104625	vomeronasal 2, receptor 14
CUST_13213_PI419772161	0.005787	8.20398	up	Apof	NM_133997	Mus musculus apolipoprotein F (Apof), mRNA [NM_133997]
CUST_19029_PI419772161	0.00315853	8.20284	up	Gm4976	NM_001013764	hypothetical protein LOC244595
CUST_20409_PI419772161	0.000342166	8.19374	up	Casq1	NM_009813	Mus musculus calsequestrin 1 (Casq1), nuclear gene encoding mitochondrial protein, mRNA [NM_009813]
CUST_9106_PI419772161	0.00530594	8.18747	up	Dpep3	NM_027960	Mus musculus dipeptidase 3 (Dpep3), mRNA [NM_027960]
CUST_5113_PI419772161	0.00522992	8.17433	up	Trem3	NM_021407	Mus musculus triggering receptor expressed on myeloid cells 3 (Trem3), mRNA [NM_021407]
CUST_12557_PI419772161	0.00423253	8.16944	up	Cdkl5	NM_001024624	Mus musculus cyclin-dependent kinase-like 5 (Cdkl5), mRNA [NM_001024624]
CUST_7202_PI419772161	0.0307966	8.16745	up	6820408C15Rik	NM_177656	Mus musculus RIKEN cDNA 6820408C15 gene (6820408C15Rik), mRNA [NM_177656]
CUST_5349_PI419772161	0.0197693	8.163	up	Defb34	NM_183035	Mus musculus defensin beta 34 (Defb34), mRNA [NM_183035]
CUST_14961_PI419772161	0.000243883	8.16193	up	Csda	NM_011733	Mus musculus cold shock domain protein A (Csda), transcript variant 2, mRNA [NM_011733]
CUST_19353_PI419772161	0.000360565	8.12801	up	Map4k1	NM_008279	Mus musculus mitogen-activated protein kinase kinase kinase kinase 1 (Map4k1), mRNA [NM_008279]
CUST_10808_PI419772161	0.00996363	8.12537	up	Vmn2r21	NM_001104635	vomeronasal receptor Vmn2r21
CUST_2298_PI419772161	0.00321048	8.11445	up	Vmn1r226	NM_134191	Mus musculus vomeronasal 1 receptor 226 (Vmn1r226), mRNA [NM_134191]
CUST_18195_PI419772161	0.00326196	8.09492	up	Mocs3	NM_001160330	Mus musculus molybdenum cofactor synthesis 3 (Mocs3), mRNA [NM_001160330]
CUST_1096_PI419772161	0.00542169	8.08293	up	Pnmal1	NM_001007569	Mus musculus PNMA-like 1 (Pnmal1), mRNA [NM_001007569]
CUST_17073_PI419772161	0.00305994	8.0701	up	Gstm5	NM_010360	Mus musculus glutathione S-transferase, mu 5 (Gstm5), mRNA [NM_010360]
CUST_11681_PI419772161	0.000454679	8.06125	up	1700113I22Rik	NM_026865	Mus musculus RIKEN cDNA 1700113I22 gene (1700113I22Rik), mRNA [NM_026865]
CUST_15468_PI419772161	0.0109959	8.04814	up	Msmp	NM_001099314	Vmicroseminoprotein, prostate associated
CUST_4012_PI419772161	0.00342479	8.03959	up	Gpr19	NM_008157	Mus musculus G protein-coupled receptor 19 (Gpr19), transcript variant 8, mRNA [NM_008157]
CUST_14841_PI419772161	0.00264484	8.02451	up	Jak3	NM_010589	Mus musculus Janus kinase 3 (Jak3), mRNA [NM_010589]
CUST_19146_PI419772161	0.00272627	8.00816	up	Gm5640	NM_001099302	hypothetical protein LOC434797
CUST_1215_PI419772161	0.0035708	8.00631	up	Ccpg1	NM_028181	Mus musculus cell cycle progression 1 (Ccpg1), transcript variant 2, mRNA [NM_028181]
CUST_21228_PI419772161	0.0357111	8.00553	up	Nrl	NM_001136074	neural retina leucine zipper protein isoform 2
CUST_14023_PI419772161	0.040706	8.00443	up	Fam5c	NM_153539	Mus musculus family with sequence similarity 5, member C (Fam5c), transcript variant 1, mRNA [NM_153539]
CUST_10269_PI419772161	0.00509232	8.00066	up	Slc39a8	NM_001135150	solute carrier family 39 (metal ion
CUST_14282_PI419772161	0.000848338	7.99057	up	Muc20	NM_001145874	mucin 20 isoform a
CUST_18244_PI419772161	0.00779353	7.98249	up	Chit1	NM_027979	Mus musculus chitinase 1 (chitotriosidase) (Chit1), mRNA [NM_027979]
CUST_6615_PI419772161	0.00668384	7.96748	up	Rtn1	NM_001007596	reticulon 1 isoform RTN1-C
CUST_15799_PI419772161	0.00384101	7.96366	up	Casz1	NM_027195	Mus musculus castor homolog 1, zinc finger (Drosophila) (Casz1), transcript variant 2, mRNA [NM_027195]
CUST_14743_PI419772161	0.000691527	7.9504	up	Fgg	NM_133862	Mus musculus fibrinogen gamma chain (Fgg), mRNA [NM_133862]
CUST_9988_PI419772161	0.0131733	7.94809	up	Prl7d1	NM_011120	Mus musculus prolactin family 7, subfamily d, member 1 (Prl7d1), mRNA [NM_011120]
CUST_17722_PI419772161	0.00538068	7.9361	up	Pdk2	NM_133667	pyruvate dehydrogenase kinase 2
CUST_13299_PI419772161	0.00853164	7.92798	up	Gria4	NM_001113181	glutamate receptor, ionotropic, AMPA 4 isoform 3
CUST_8132_PI419772161	0.000553957	7.92366	up	Fam128b	NM_029354	Mus musculus family with sequence similarity 128, member B (Fam128b), mRNA [NM_029354]
CUST_6215_PI419772161	0.0446896	7.90058	up	Sytl5	NM_177704	Mus musculus synaptotagmin-like 5 (Sytl5), mRNA [NM_177704]
CUST_3136_PI419772161	0.00132782	7.8948	up	B9d1	NM_013717	Mus musculus B9 protein domain 1 (B9d1), mRNA [NM_013717]
CUST_20007_PI419772161	0.0036523	7.88162	up	Hspb6	NM_001012401	Mus musculus heat shock protein, alpha-crystallin-related, B6 (Hspb6), mRNA [NM_001012401]
CUST_6742_PI419772161	0.000993454	7.864	up	Rasal1	NM_013832	Mus musculus RAS protein activator like 1 (GAP1 like) (Rasal1), mRNA [NM_013832]
CUST_4327_PI419772161	0.00123318	7.86095	up	Ttll9	NM_001083618	tubulin tyrosine ligase like family 9 isoform 1
CUST_13638_PI419772161	0.0073747	7.85574	up	Kcnc1	NM_008421	Mus musculus potassium voltage gated channel, Shaw-related subfamily, member 1 (Kcnc1), transcript variant B, mRNA [NM_008421]
CUST_18696_PI419772161	0.00473633	7.84024	up	Sost	NM_024449	Mus musculus sclerostin (Sost), mRNA [NM_024449]
CUST_4881_PI419772161	0.0029145	7.83896	up	Apol10a	NM_177744	Mus musculus apolipoprotein L 10a (Apol10a), mRNA [NM_177744]
CUST_20477_PI419772161	0.000932856	7.83751	up	Arhgef7	NM_001113517	Mus musculus Rho guanine nucleotide exchange factor (GEF7) (Arhgef7), transcript variant 1, mRNA [NM_001113517]
CUST_7491_PI419772161	0.00462752	7.83207	up	Adat3	NM_001100606	Mus musculus adenosine deaminase, tRNA-specific 3, TAD2 homolog (S. cerevisiae) (Adat3), mRNA [NM_001100606]
CUST_17839_PI419772161	0.0102978	7.82552	up	Fam48a	NM_019995	Mus musculus family with sequence similarity 48, member A (Fam48a), mRNA [NM_019995]
CUST_14518_PI419772161	7.7692e-05	7.82287	up	Lrch4	NM_146164	Mus musculus leucine-rich repeats and calponin homology (CH) domain containing 4 (Lrch4), transcript variant 1, mRNA [NM_146164]
CUST_6456_PI419772161	0.0109017	7.79646	up	Anubl1	NM_001081317	Mus musculus AN1, ubiquitin-like, homolog (Xenopus laevis) (Anubl1), mRNA [NM_001081317]
CUST_10902_PI419772161	0.000134142	7.794	up	Ccl27a	NM_001048179	chemokine (C-C motif) ligand 27A isoform b
CUST_18779_PI419772161	0.0121309	7.7778	up	Gm815	NM_001033407	hypothetical protein LOC329047
CUST_1366_PI419772161	0.0014276	7.77304	up	Hist1h4h	NM_153173	histone cluster 1, H4h
CUST_15939_PI419772161	0.00443924	7.76197	up	Fgd2	NM_001159538	FYVE, RhoGEF and PH domain containing 2 isoform
CUST_16651_PI419772161	0.00344973	7.76134	up	Ppap2a	NM_008247	phosphatidic acid phosphatase type 2A isoform 1
CUST_13424_PI419772161	0.0167901	7.75671	up	Pcdhga10	NM_033593	protocadherin gamma subfamily A, 10
CUST_20151_PI419772161	0.00372454	7.75073	up	Dll3	NM_007866	Mus musculus delta-like 3 (Drosophila) (Dll3), mRNA [NM_007866]
CUST_19066_PI419772161	0.00201161	7.73416	up	Gm11818	NM_173746	Mus musculus predicted gene 11818 (Gm11818), transcript variant 1, mRNA [NM_173746]
CUST_740_PI419772161	0.0006412	7.70954	up	AV249152	NM_145425	Mus musculus expressed sequence AV249152 (AV249152), mRNA [NM_145425]
CUST_18843_PI419772161	0.00873311	7.68096	up	Gm648	NM_001033372	hypothetical protein LOC270599
CUST_2038_PI419772161	0.00113039	7.66892	up	Tmprss9	NM_001081688	transmembrane protease, serine 9
CUST_5634_PI419772161	0.000484838	7.66364	up	Gpr1	NM_146250	Mus musculus G protein-coupled receptor 1 (Gpr1), mRNA [NM_146250]
CUST_370_PI419772161	0.000283332	7.64444	up	Hcfc2	NM_001081218	Mus musculus host cell factor C2 (Hcfc2), mRNA [NM_001081218]
CUST_8073_PI419772161	0.00510919	7.63798	up	Ly6k	NM_029627	Mus musculus lymphocyte antigen 6 complex, locus K (Ly6k), mRNA [NM_029627]
CUST_1690_PI419772161	0.000139679	7.63333	up	Plekhn1	NM_001008233	Mus musculus pleckstrin homology domain containing, family N member 1 (Plekhn1), mRNA [NM_001008233]
CUST_8442_PI419772161	0.0276873	7.62872	up	Cpvl	NM_027749	Mus musculus carboxypeptidase, vitellogenic-like (Cpvl), mRNA [NM_027749]
CUST_1476_PI419772161	0.00149448	7.62423	up	Grin3b	NM_130455	Mus musculus glutamate receptor, ionotropic, NMDA3B (Grin3b), mRNA [NM_130455]
CUST_20803_PI419772161	0.0267796	7.6225	up	Nr1i2	NM_010936	Mus musculus nuclear receptor subfamily 1, group I, member 2 (Nr1i2), transcript variant 1, mRNA [NM_010936]
CUST_19682_PI419772161	0.00723615	7.61867	up	Cdkn1c	NM_009876	Mus musculus cyclin-dependent kinase inhibitor 1C (P57) (Cdkn1c), transcript variant 2, mRNA [NM_009876]
CUST_7673_PI419772161	0.000427155	7.61428	up	Ddx25	NM_013932	Mus musculus DEAD (Asp-Glu-Ala-Asp) box polypeptide 25 (Ddx25), mRNA [NM_013932]
CUST_3011_PI419772161	0.00249618	7.60601	up	Pcsk4	NM_008793	Mus musculus proprotein convertase subtilisin/kexin type 4 (Pcsk4), mRNA [NM_008793]
CUST_12978_PI419772161	0.000705294	7.59658	up	Clip1	NM_019765	Mus musculus CAP-GLY domain containing linker protein 1 (Clip1), mRNA [NM_019765]
CUST_4086_PI419772161	0.00636389	7.5821	up	Hemt1	NM_010416	Mus musculus hematopoietic cell transcript 1 (Hemt1), mRNA [NM_010416]
CUST_11964_PI419772161	0.000995802	7.57917	up	Oscp1	NM_172701	Mus musculus organic solute carrier partner 1 (Oscp1), mRNA [NM_172701]
CUST_7427_PI419772161	0.000100481	7.51965	up	Myo1a	NM_001081219	Mus musculus myosin IA (Myo1a), mRNA [NM_001081219]
CUST_18095_PI419772161	0.000226422	7.5175	up	Ankrd54	NM_144849	Mus musculus ankyrin repeat domain 54 (Ankrd54), mRNA [NM_144849]
CUST_6633_PI419772161	0.000514111	7.50978	up	Zcchc2	NM_001122676	zinc finger, CCHC domain containing 2 isoform A
CUST_16483_PI419772161	0.00450096	7.48312	up	Trpc7	NM_012035	Mus musculus transient receptor potential cation channel, subfamily C, member 7 (Trpc7), mRNA [NM_012035]
CUST_11308_PI419772161	0.00271529	7.48081	up	Pmp2	NM_001030305	Mus musculus peripheral myelin protein 2 (Pmp2), mRNA [NM_001030305]
CUST_7448_PI419772161	0.00495911	7.47792	up	Gp1bb	NM_001001999	Mus musculus glycoprotein Ib, beta polypeptide (Gp1bb), transcript variant 1, mRNA [NM_001001999]
CUST_20797_PI419772161	0.000315476	7.46939	up	Icam5	NM_008319	Mus musculus intercellular adhesion molecule 5, telencephalin (Icam5), mRNA [NM_008319]
CUST_16491_PI419772161	7.32856e-05	7.46861	up	Ak1	NM_021515	Mus musculus adenylate kinase 1 (Ak1), mRNA [NM_021515]
CUST_22345_PI419772161	0.000466847	7.46492	up	Lbxcor1	NM_172446	Mus musculus ladybird homeobox 1 homolog (Drosophila) corepressor 1 (Lbxcor1), transcript variant 1, mRNA [NM_172446]
CUST_18080_PI419772161	0.00226008	7.44446	up	Myt1l	NM_001093778	myelin transcription factor 1-like isoform 3
CUST_16428_PI419772161	0.00205701	7.4394	up	Hagh	NM_001159626	hydroxyacylglutathione hydrolase isoform 2
CUST_20712_PI419772161	0.00753289	7.39482	up	Agt	NM_007428	Mus musculus angiotensinogen (serpin peptidase inhibitor, clade A, member 8) (Agt), mRNA [NM_007428]
CUST_9754_PI419772161	0.00108908	7.38262	up	Tchp	NM_029992	Mus musculus trichoplein, keratin filament binding (Tchp), mRNA [NM_029992]
CUST_7748_PI419772161	0.00372099	7.37627	up	Dok7	NM_172708	Mus musculus docking protein 7 (Dok7), mRNA [NM_172708]
CUST_17982_PI419772161	0.00767991	7.37131	up	Scn8a	NM_011323	sodium channel, voltage-gated, type VIII, alpha
CUST_13520_PI419772161	0.0119224	7.36148	up	Spnb4	NM_032610	Mus musculus spectrin beta 4 (Spnb4), mRNA [NM_032610]
CUST_20940_PI419772161	0.0468756	7.3491	up	Rph3a	NM_011286	Mus musculus rabphilin 3A (Rph3a), mRNA [NM_011286]
CUST_10739_PI419772161	0.00347314	7.33819	up	Rassf6	NM_028478	Mus musculus Ras association (RalGDS/AF-6) domain family member 6 (Rassf6), mRNA [NM_028478]
CUST_18526_PI419772161	0.0252836	7.32772	up	Eif4g2	NM_001040131	Mus musculus eukaryotic translation initiation factor 4, gamma 2 (Eif4g2), transcript variant 2, mRNA [NM_001040131]
CUST_3000_PI419772161	0.000187016	7.28312	up	Elof1	NM_170777	Mus musculus elongation factor 1 homolog (ELF1, S. cerevisiae) (Elof1), mRNA [NM_170777]
CUST_9211_PI419772161	0.00348117	7.28003	up	Fam161b	NM_172581	Mus musculus family with sequence similarity 161, member B (Fam161b), mRNA [NM_172581]
CUST_18073_PI419772161	0.000649761	7.27573	up	Myt1l	NM_008666	Mus musculus myelin transcription factor 1-like (Myt1l), transcript variant 2, mRNA [NM_008666]
CUST_20341_PI419772161	0.000624999	7.26084	up	Grip1	NM_028736	Mus musculus glutamate receptor interacting protein 1 (Grip1), transcript variant 1, mRNA [NM_028736]
CUST_12688_PI419772161	0.00155606	7.26057	up	2300009A05Rik	NM_027090	Mus musculus RIKEN cDNA 2300009A05 gene (2300009A05Rik), mRNA [NM_027090]
CUST_1411_PI419772161	0.00106287	7.25838	up	Tmem130	NM_177735	Mus musculus transmembrane protein 130 (Tmem130), mRNA [NM_177735]
CUST_6614_PI419772161	9.11078e-05	7.25837	up	Rtn1	NM_153457	Mus musculus reticulon 1 (Rtn1), transcript variant 1, mRNA [NM_153457]
CUST_16741_PI419772161	0.0139516	7.24974	up	Chrnb3	NM_027454	Mus musculus cholinergic receptor, nicotinic, beta polypeptide 3 (Chrnb3), transcript variant 2, mRNA [NM_027454]
CUST_19461_PI419772161	0.00739735	7.23075	up	Klre1	NM_153590	Mus musculus killer cell lectin-like receptor family E member 1 (Klre1), mRNA [NM_153590]
CUST_1986_PI419772161	0.000861389	7.2286	up	Armc9	NM_027456	Mus musculus armadillo repeat containing 9 (Armc9), transcript variant 2, mRNA [NM_027456]
CUST_19349_PI419772161	0.0021181	7.21993	up	Pcsk1	NM_013628	Mus musculus proprotein convertase subtilisin/kexin type 1 (Pcsk1), mRNA [NM_013628]
CUST_1472_PI419772161	0.000688219	7.20813	up	Dbndd1	NM_028146	Mus musculus dysbindin (dystrobrevin binding protein 1) domain containing 1 (Dbndd1), transcript variant 1, mRNA [NM_028146]
CUST_241_PI419772161	0.0487746	7.19706	up	4931429I11Rik	NM_001081121	Mus musculus RIKEN cDNA 4931429I11 gene (4931429I11Rik), mRNA [NM_001081121]
CUST_14828_PI419772161	0.000295119	7.19492	up	Wdfy4	NM_001146022	Mus musculus WD repeat and FYVE domain containing 4 (Wdfy4), mRNA [NM_001146022]
CUST_15938_PI419772161	0.00668396	7.19388	up	Fgd2	NM_013710	Mus musculus FYVE, RhoGEF and PH domain containing 2 (Fgd2), transcript variant 2, mRNA [NM_013710]
CUST_6338_PI419772161	0.0292354	7.19178	up	Dcdc2a	NM_177577	Mus musculus doublecortin domain containing 2a (Dcdc2a), mRNA [NM_177577]
CUST_11466_PI419772161	0.00449041	7.16874	up	Slc39a8	NM_026228	Mus musculus solute carrier family 39 (metal ion transporter), member 8 (Slc39a8), transcript variant 3, mRNA [NM_026228]
CUST_10429_PI419772161	0.0364055	7.1664	up	Kcnj9	NM_008429	Mus musculus potassium inwardly-rectifying channel, subfamily J, member 9 (Kcnj9), mRNA [NM_008429]
CUST_22310_PI419772161	0.000778905	7.15723	up	4930432K21Rik	NM_029045	Mus musculus RIKEN cDNA 4930432K21 gene (4930432K21Rik), transcript variant 1, mRNA [NM_029045]
CUST_13731_PI419772161	0.00146211	7.15307	up	Prdm6	NM_001033281	Mus musculus PR domain containing 6 (Prdm6), mRNA [NM_001033281]
CUST_21276_PI419772161	0.00227678	7.14902	up	En2	NM_010134	Mus musculus engrailed 2 (En2), mRNA [NM_010134]
CUST_15539_PI419772161	0.00165855	7.14349	up	Hk1	NM_001146100	Mus musculus hexokinase 1 (Hk1), nuclear gene encoding mitochondrial protein, transcript variant 1, mRNA [NM_001146100]
CUST_3882_PI419772161	0.0124177	7.13995	up	Asb18	NM_139152	Mus musculus ankyrin repeat and SOCS box-containing 18 (Asb18), mRNA [NM_139152]
CUST_89_PI419772161	0.00946513	7.13972	up	Zfp646	NM_172749	Mus musculus zinc finger protein 646 (Zfp646), mRNA [NM_172749]
CUST_9171_PI419772161	0.00132887	7.13965	up	Scly	NM_016717	Mus musculus selenocysteine lyase (Scly), mRNA [NM_016717]
CUST_17879_PI419772161	0.00171597	7.10894	up	Il21	NM_021782	Mus musculus interleukin 21 (Il21), mRNA [NM_021782]
CUST_20060_PI419772161	0.00102372	7.10603	up	Ptbp2	NM_019550	Mus musculus polypyrimidine tract binding protein 2 (Ptbp2), mRNA [NM_019550]
CUST_767_PI419772161	0.0024646	7.10082	up	D11Wsu47e	NM_177777	Mus musculus DNA segment, Chr 11, Wayne State University 47, expressed (D11Wsu47e), mRNA [NM_177777]
CUST_946_PI419772161	0.03192	7.09525	up	Wdr38	NM_029687	Mus musculus WD repeat domain 38 (Wdr38), mRNA [NM_029687]
CUST_6326_PI419772161	0.0117829	7.06123	up	Ksr2	NM_001114545	kinase suppressor of ras 2 isoform 1
CUST_21873_PI419772161	0.000401968	7.0492	up	C030019I05Rik	NM_177075	Mus musculus RIKEN cDNA C030019I05 gene (C030019I05Rik), mRNA [NM_177075]
CUST_12939_PI419772161	0.0173208	7.04616	up	Rabl2a	NM_026817	Mus musculus RAB, member of RAS oncogene family-like 2A (Rabl2a), mRNA [NM_026817]
CUST_520_PI419772161	0.00782202	7.01656	up	4930434E21Rik	NM_029440	Mus musculus RIKEN cDNA 4930434E21 gene (4930434E21Rik), mRNA [NM_029440]
CUST_17295_PI419772161	0.013268	7.0116	up	Sox14	NM_011440	Mus musculus SRY-box containing gene 14 (Sox14), mRNA [NM_011440]
CUST_1963_PI419772161	0.00287838	6.99912	up	Olfr128	NM_206816	Mus musculus olfactory receptor 128 (Olfr128), mRNA [NM_206816]
CUST_20098_PI419772161	0.00267092	6.99445	up	Hgd	NM_013547	Mus musculus homogentisate 1, 2-dioxygenase (Hgd), transcript variant 1, mRNA [NM_013547]
CUST_21925_PI419772161	0.00226236	6.9858	up	Trafd1	NM_172275	Mus musculus TRAF type zinc finger domain containing 1 (Trafd1), transcript variant 2, mRNA [NM_172275]
CUST_14726_PI419772161	0.000369503	6.97875	up	Rhox3g	NM_001145406	reproductive homeobox 3G
CUST_2020_PI419772161	0.00531096	6.95695	up	Klra21	NM_053151	Mus musculus killer cell lectin-like receptor subfamily A, member 21 (Klra21), mRNA [NM_053151]
CUST_11890_PI419772161	0.00137658	6.94438	up	Ppp2r5c	NM_012023	Mus musculus protein phosphatase 2, regulatory subunit B (B56), gamma isoform (Ppp2r5c), transcript variant 1, mRNA [NM_012023]
CUST_21124_PI419772161	0.00156789	6.93967	up	Ctns	NM_031251	Mus musculus cystinosis, nephropathic (Ctns), mRNA [NM_031251]
CUST_3181_PI419772161	0.00189797	6.93362	up	Pigf	NM_008838	Mus musculus phosphatidylinositol glycan anchor biosynthesis, class F (Pigf), mRNA [NM_008838]
CUST_6451_PI419772161	0.00219932	6.92415	up	Ppp1r13l	NM_001010836	Mus musculus protein phosphatase 1, regulatory (inhibitor) subunit 13 like (Ppp1r13l), mRNA [NM_001010836]
CUST_8941_PI419772161	0.00159109	6.92287	up	Aars2	NM_198608	Mus musculus alanyl-tRNA synthetase 2, mitochondrial (putative) (Aars2), nuclear gene encoding mitochondrial protein, mRNA [NM_198608]
CUST_9823_PI419772161	0.00174275	6.91707	up	Sept14	NM_028826	Mus musculus septin 14 (Sept14), mRNA [NM_028826]
CUST_15764_PI419772161	0.000137382	6.90806	up	Fyttd1	NM_001159349	forty-two-three domain containing 1 isoform 2
CUST_14511_PI419772161	0.00596739	6.9033	up	Fam124b	NM_173425	Mus musculus family with sequence similarity 124, member B (Fam124b), mRNA [NM_173425]
CUST_15779_PI419772161	0.000787483	6.90014	up	Senp2	NM_029457	Mus musculus SUMO/sentrin specific peptidase 2 (Senp2), transcript variant 1, mRNA [NM_029457]
CUST_10555_PI419772161	0.000418911	6.89913	up	Akr1c13	NM_013778	aldo-keto reductase family 1, member C13
CUST_10537_PI419772161	0.00387834	6.89371	up	Rai2	NM_001103367	retinoic acid induced 2
CUST_17234_PI419772161	0.00791258	6.892	up	Dbh	NM_138942	Mus musculus dopamine beta hydroxylase (Dbh), mRNA [NM_138942]
CUST_6972_PI419772161	0.00385893	6.88197	up	Xirp2	NM_001083919	xin actin-binding repeat containing 2 isoform 2
CUST_2595_PI419772161	0.00168479	6.87282	up	Chrac1	NM_053068	Mus musculus chromatin accessibility complex 1 (Chrac1), mRNA [NM_053068]
CUST_7266_PI419772161	0.00183613	6.82855	up	Armc2	NM_001034858	Mus musculus armadillo repeat containing 2 (Armc2), mRNA [NM_001034858]
CUST_17786_PI419772161	0.000106714	6.81839	up	Cela3b	NM_026419	Mus musculus chymotrypsin-like elastase family, member 3B (Cela3b), mRNA [NM_026419]
CUST_6675_PI419772161	0.0187764	6.80991	up	Trim46	NM_183037	Mus musculus tripartite motif-containing 46 (Trim46), transcript variant 2, mRNA [NM_183037]
CUST_6970_PI419772161	0.00290173	6.80623	up	Rdh11	NM_021557	Mus musculus retinol dehydrogenase 11 (Rdh11), mRNA [NM_021557]
CUST_18386_PI419772161	0.0057848	6.8049	up	Hoxa3	NM_010452	Mus musculus homeobox A3 (Hoxa3), mRNA [NM_010452]
CUST_7726_PI419772161	0.000564493	6.80164	up	Pcdh17	NM_001013753	Mus musculus protocadherin 17 (Pcdh17), mRNA [NM_001013753]
CUST_3306_PI419772161	0.0262649	6.7984	up	Gkn2	NM_025467	Mus musculus gastrokine 2 (Gkn2), mRNA [NM_025467]
CUST_2636_PI419772161	0.000195496	6.79673	up	Hormad1	NM_026489	Mus musculus HORMA domain containing 1 (Hormad1), mRNA [NM_026489]
CUST_22332_PI419772161	0.000245383	6.76981	up	1110004E09Rik	NM_026502	Mus musculus RIKEN cDNA 1110004E09 gene (1110004E09Rik), mRNA [NM_026502]
CUST_6841_PI419772161	0.0269863	6.75731	up	EG635895	NM_001122977	hypothetical protein LOC635895
CUST_16427_PI419772161	0.000143251	6.73652	up	Hagh	NM_024284	Mus musculus hydroxyacyl glutathione hydrolase (Hagh), nuclear gene encoding mitochondrial protein, transcript variant 1, mRNA [NM_024284]
CUST_9120_PI419772161	0.00406291	6.73266	up	Ampd1	NM_001033303	Mus musculus adenosine monophosphate deaminase 1 (Ampd1), mRNA [NM_001033303]
CUST_17347_PI419772161	0.0363639	6.72067	up	Gpr82	NM_175669	Mus musculus G protein-coupled receptor 82 (Gpr82), mRNA [NM_175669]
CUST_13062_PI419772161	0.0119437	6.71915	up	Grm6	NM_173372	Mus musculus glutamate receptor, metabotropic 6 (Grm6), mRNA [NM_173372]
CUST_9546_PI419772161	0.00125179	6.69948	up	Mgll	NM_011844	Mus musculus monoglyceride lipase (Mgll), transcript variant 2, mRNA [NM_011844]
CUST_643_PI419772161	0.0421917	6.69791	up	Dytn	NM_001081658	dystrotelin
CUST_12433_PI419772161	0.00137619	6.68652	up	Mns1	NM_008613	Mus musculus meiosis-specific nuclear structural protein 1 (Mns1), mRNA [NM_008613]
CUST_1082_PI419772161	0.0026001	6.67064	up	Angel1	NM_144524	Mus musculus angel homolog 1 (Drosophila) (Angel1), mRNA [NM_144524]
CUST_3562_PI419772161	0.00735192	6.66874	up	Apol7b	NM_001024848	apolipoprotein L 7b
CUST_16740_PI419772161	0.0242396	6.66121	up	Chrnb3	NM_173212	Mus musculus cholinergic receptor, nicotinic, beta polypeptide 3 (Chrnb3), transcript variant 1, mRNA [NM_173212]
CUST_15262_PI419772161	0.000300969	6.66077	up	Ptprh	NM_207270	Mus musculus protein tyrosine phosphatase, receptor type, H (Ptprh), mRNA [NM_207270]
CUST_17386_PI419772161	4.16192e-06	6.64138	up	Nme7	NM_138314	Mus musculus non-metastatic cells 7, protein expressed in (nucleoside-diphosphate kinase) (Nme7), transcript variant 1, mRNA [NM_138314]
CUST_16719_PI419772161	0.00233735	6.63649	up	Ccdc101	NM_029339	Mus musculus coiled-coil domain containing 101 (Ccdc101), mRNA [NM_029339]
CUST_18078_PI419772161	0.0070797	6.63531	up	Myt1l	NM_001093776	myelin transcription factor 1-like isoform 2
CUST_13134_PI419772161	0.0151099	6.62634	up	Nek1	NM_175089	Mus musculus NIMA (never in mitosis gene a)-related expressed kinase 1 (Nek1), mRNA [NM_175089]
CUST_10636_PI419772161	0.00331145	6.6189	up	Ppp2r5c	NM_001081457	gamma isoform of regulatory subunit B56, protein
CUST_20200_PI419772161	0.0334943	6.61524	up	Lrat	NM_023624	Mus musculus lecithin-retinol acyltransferase (phosphatidylcholine-retinol-O-acyltransferase) (Lrat), mRNA [NM_023624]
CUST_15226_PI419772161	0.000403122	6.59047	up	Cubn	NM_001081084	Mus musculus cubilin (intrinsic factor-cobalamin receptor) (Cubn), mRNA [NM_001081084]
CUST_7155_PI419772161	0.0104597	6.58654	up	Tctex1d2	NM_025329	Mus musculus Tctex1 domain containing 2 (Tctex1d2), mRNA [NM_025329]
CUST_9112_PI419772161	0.000421639	6.57491	up	Sec1	NM_019934	Mus musculus secretory blood group 1 (Sec1), mRNA [NM_019934]
CUST_15701_PI419772161	0.000759281	6.57313	up	Scn1a	NM_018733	Mus musculus sodium channel, voltage-gated, type I, alpha (Scn1a), mRNA [NM_018733]
CUST_17974_PI419772161	0.00430839	6.56649	up	Scn8a	NM_001077499	Mus musculus sodium channel, voltage-gated, type VIII, alpha (Scn8a), transcript variant 1, mRNA [NM_001077499]
CUST_18076_PI419772161	0.00311304	6.55997	up	Myt1l	NM_001093775	Mus musculus myelin transcription factor 1-like (Myt1l), transcript variant 1, mRNA [NM_001093775]
A_51_P346445	0.000386571	6.54469	up	Hspb7	NM_013868	Mus musculus heat shock protein family, member 7 (cardiovascular) (Hspb7), mRNA [NM_013868]
CUST_1657_PI419772161	0.00688112	6.54467	up	Rnf183	NM_153504	Mus musculus ring finger protein 183 (Rnf183), mRNA [NM_153504]
CUST_3740_PI419772161	0.00344138	6.53686	up	Rhox3f	NM_001040089	reproductive homeobox 3F
CUST_11260_PI419772161	0.0150289	6.53164	up	Upp2	NM_029692	Mus musculus uridine phosphorylase 2 (Upp2), mRNA [NM_029692]
CUST_391_PI419772161	0.00130744	6.52279	up	Fbxo47	NM_001081435	F-box protein 47
CUST_13587_PI419772161	0.00120221	6.51822	up	Nxph1	NM_008751	Mus musculus neurexophilin 1 (Nxph1), mRNA [NM_008751]
CUST_18134_PI419772161	0.00151042	6.51639	up	Ppp3cc	NM_008915	Mus musculus protein phosphatase 3, catalytic subunit, gamma isoform (Ppp3cc), mRNA [NM_008915]
CUST_8702_PI419772161	0.00037391	6.50086	up	Cyp2f2	NM_007817	Mus musculus cytochrome P450, family 2, subfamily f, polypeptide 2 (Cyp2f2), mRNA [NM_007817]
CUST_2019_PI419772161	0.000132752	6.49863	up	Frat1	NM_008043	Mus musculus frequently rearranged in advanced T-cell lymphomas (Frat1), mRNA [NM_008043]
CUST_14863_PI419772161	0.0257426	6.49337	up	Kcnk10	NM_029911	Mus musculus potassium channel, subfamily K, member 10 (Kcnk10), mRNA [NM_029911]
CUST_10968_PI419772161	0.00166085	6.4924	up	Fam89a	NM_001081120	Mus musculus family with sequence similarity 89, member A (Fam89a), mRNA [NM_001081120]
CUST_18500_PI419772161	0.008577	6.4808	up	Gfap	NM_010277	Mus musculus glial fibrillary acidic protein (Gfap), transcript variant 2, mRNA [NM_010277]
CUST_19450_PI419772161	0.0157651	6.47713	up	Oprl1	NM_011012	Mus musculus opioid receptor-like 1 (Oprl1), mRNA [NM_011012]
CUST_16512_PI419772161	0.000261535	6.46869	up	Hmox2	NM_010443	Mus musculus heme oxygenase (decycling) 2 (Hmox2), transcript variant 2, mRNA [NM_010443]
CUST_13072_PI419772161	0.00154264	6.45832	up	Ift122	NM_031177	Mus musculus intraflagellar transport 122 homolog (Chlamydomonas) (Ift122), transcript variant 1, mRNA [NM_031177]
CUST_13556_PI419772161	0.0476585	6.44801	up	Mc3r	NM_008561	Mus musculus melanocortin 3 receptor (Mc3r), mRNA [NM_008561]
CUST_11002_PI419772161	0.00791798	6.43897	up	Mlf1	NM_001039543	myeloid leukemia factor 1 isoform a
CUST_11601_PI419772161	0.00438	6.42846	up	Ankrd33b	NM_027496	Mus musculus ankyrin repeat domain 33B (Ankrd33b), transcript variant 2, mRNA [NM_027496]
CUST_10728_PI419772161	0.00160506	6.40533	up	Spp2	NM_029269	Mus musculus secreted phosphoprotein 2 (Spp2), mRNA [NM_029269]
CUST_925_PI419772161	0.00227239	6.40498	up	Serf1	NM_011353	Mus musculus small EDRK-rich factor 1 (Serf1), mRNA [NM_011353]
CUST_13588_PI419772161	0.00410259	6.40082	up	Pcdhga2	NM_033585	protocadherin gamma subfamily A, 2
CUST_22420_PI419772161	0.00177894	6.39914	up	Bcap29	NM_007530	Mus musculus B-cell receptor-associated protein 29 (Bcap29), transcript variant 1, mRNA [NM_007530]
CUST_4479_PI419772161	0.00569148	6.39652	up	Olfr1037	NM_001011532	olfactory receptor 1037
CUST_16556_PI419772161	4.92841e-05	6.39287	up	Git1	NM_001004144	Mus musculus G protein-coupled receptor kinase-interactor 1 (Git1), mRNA [NM_001004144]
CUST_14928_PI419772161	0.00134576	6.39241	up	Syce1	NM_001143765	Mus musculus synaptonemal complex central element protein 1 (Syce1), mRNA [NM_001143765]
CUST_21474_PI419772161	0.00446688	6.3846	up	Sh2b3	NM_008507	Mus musculus SH2B adaptor protein 3 (Sh2b3), mRNA [NM_008507]
CUST_6570_PI419772161	0.0136528	6.38285	up	Tcerg1l	NM_183289	Mus musculus transcription elongation regulator 1-like (Tcerg1l), mRNA [NM_183289]
CUST_15906_PI419772161	0.00239707	6.36516	up	Ppp4r4	NM_028980	Mus musculus protein phosphatase 4, regulatory subunit 4 (Ppp4r4), mRNA [NM_028980]
CUST_16498_PI419772161	0.00389	6.36326	up	Ppap2a	NM_008903	Mus musculus phosphatidic acid phosphatase type 2A (Ppap2a), transcript variant 2, mRNA [NM_008903]
CUST_21883_PI419772161	0.00133248	6.34749	up	Agpat1	NM_018862	Mus musculus 1-acylglycerol-3-phosphate O-acyltransferase 1 (lysophosphatidic acid acyltransferase, alpha) (Agpat1), transcript variant 2, mRNA [NM_018862]
CUST_6905_PI419772161	0.00994634	6.33556	up	Ttc26	NM_153600	Mus musculus tetratricopeptide repeat domain 26 (Ttc26), mRNA [NM_153600]
CUST_11222_PI419772161	0.000343885	6.31671	up	Cyp3a44	NM_177380	Mus musculus cytochrome P450, family 3, subfamily a, polypeptide 44 (Cyp3a44), mRNA [NM_177380]
CUST_5018_PI419772161	0.00394444	6.31518	up	4933403G14Rik	NM_028908	Mus musculus RIKEN cDNA 4933403G14 gene (4933403G14Rik), mRNA [NM_028908]
[truncated: 229 more rows]

## Sheet: Down-regulated
Probe ID	p-value	FCAbsolute	Regulation	Gene Symbol	GenBank Accession	Description
CUST_16635_PI419772161	0.00143707	293.896	down	Bcan	NM_001109758	brevican isoform 2
CUST_5568_PI419772161	0.000504301	244.889	down	Sel1l3	NM_172710	Mus musculus sel-1 suppressor of lin-12-like 3 (C. elegans) (Sel1l3), mRNA [NM_172710]
CUST_13915_PI419772161	0.00229329	203.815	down	Grem2	NM_011825	Mus musculus gremlin 2 homolog, cysteine knot superfamily (Xenopus laevis) (Grem2), mRNA [NM_011825]
CUST_16031_PI419772161	0.000140292	187.097	down	Padi2	NM_008812	Mus musculus peptidyl arginine deiminase, type II (Padi2), mRNA [NM_008812]
CUST_21758_PI419772161	0.000894841	146.787	down	Sfrp4	NM_016687	Mus musculus secreted frizzled-related protein 4 (Sfrp4), mRNA [NM_016687]
CUST_791_PI419772161	0.00095404	139.804	down	Defb42	NM_001034910	Mus musculus defensin beta 42 (Defb42), mRNA [NM_001034910]
CUST_11572_PI419772161	0.00786163	135.138	down	Nnat	NM_180960	neuronatin isoform beta
CUST_16634_PI419772161	0.000611265	128.086	down	Bcan	NM_007529	Mus musculus brevican (Bcan), transcript variant 1, mRNA [NM_007529]
CUST_5147_PI419772161	0.00225875	125.766	down	Kcne1l	NM_021487	Mus musculus potassium voltage-gated channel, Isk-related family, member 1-like (Kcne1l), mRNA [NM_021487]
CUST_19614_PI419772161	0.00137994	121.801	down	Gzmc	NM_010371	Mus musculus granzyme C (Gzmc), mRNA [NM_010371]
CUST_14143_PI419772161	9.48039e-05	115.258	down	Hoxb9	NM_008270	Mus musculus homeobox B9 (Hoxb9), mRNA [NM_008270]
CUST_15201_PI419772161	1.45353e-05	110.089	down	Ahsg	NM_013465	Mus musculus alpha-2-HS-glycoprotein (Ahsg), mRNA [NM_013465]
CUST_15559_PI419772161	0.0228356	101.947	down	Gpc3	NM_016697	Mus musculus glypican 3 (Gpc3), mRNA [NM_016697]
CUST_2173_PI419772161	0.0044887	90.6317	down	Arhgef17	NM_001081116	Mus musculus Rho guanine nucleotide exchange factor (GEF) 17 (Arhgef17), mRNA [NM_001081116]
CUST_20281_PI419772161	0.000142758	88.3163	down	Cldn1	NM_016674	Mus musculus claudin 1 (Cldn1), mRNA [NM_016674]
CUST_11566_PI419772161	0.00296377	87.1396	down	Nnat	NM_010923	Mus musculus neuronatin (Nnat), transcript variant 1, mRNA [NM_010923]
CUST_16242_PI419772161	0.000286104	86.3871	down	Col9a2	NM_007741	Mus musculus collagen, type IX, alpha 2 (Col9a2), mRNA [NM_007741]
CUST_21864_PI419772161	0.0348892	86.0599	down	Cxxc4	NM_001004367	Mus musculus CXXC finger 4 (Cxxc4), mRNA [NM_001004367]
CUST_5227_PI419772161	0.00727912	85.4413	down	Antxr1	NM_054041	Mus musculus anthrax toxin receptor 1 (Antxr1), mRNA [NM_054041]
CUST_16789_PI419772161	0.001403	83.4041	down	Serpine2	NM_009255	Mus musculus serine (or cysteine) peptidase inhibitor, clade E, member 2 (Serpine2), mRNA [NM_009255]
CUST_954_PI419772161	0.00242111	83.3962	down	Magea1	NM_020015	Mus musculus melanoma antigen, family A, 1 (Magea1), mRNA [NM_020015]
CUST_14799_PI419772161	0.00435777	82.4188	down	Inhba	NM_008380	Mus musculus inhibin beta-A (Inhba), mRNA [NM_008380]
CUST_16620_PI419772161	0.0139585	79.1944	down	Cdh16	NM_007663	Mus musculus cadherin 16 (Cdh16), mRNA [NM_007663]
CUST_12986_PI419772161	0.0251346	75.1405	down	S100a11	NM_016740	Mus musculus S100 calcium binding protein A11 (calgizzarin) (S100a11), mRNA [NM_016740]
CUST_10329_PI419772161	0.00275094	74.626	down	Lsp1	NM_001136071	lymphocyte specific 1 isoform 1
CUST_19991_PI419772161	0.000194769	68.327	down	Tnfrsf12a	NM_013749	Mus musculus tumor necrosis factor receptor superfamily, member 12a (Tnfrsf12a), transcript variant 1, mRNA [NM_013749]
CUST_11510_PI419772161	0.0060894	66.5984	down	Mfap4	NM_029568	Mus musculus microfibrillar-associated protein 4 (Mfap4), mRNA [NM_029568]
CUST_13381_PI419772161	0.00126168	62.2832	down	Tubb2b	NM_023716	Mus musculus tubulin, beta 2B (Tubb2b), mRNA [NM_023716]
CUST_21852_PI419772161	0.00380876	61.645	down	Nlgn1	NM_138666	Mus musculus neuroligin 1 (Nlgn1), transcript variant 1, mRNA [NM_138666]
A_51_P112223	0.00622908	61.3539	down	Gsta4	NM_010357	Mus musculus glutathione S-transferase, alpha 4 (Gsta4), mRNA [NM_010357]
CUST_19671_PI419772161	0.00224524	60.7358	down	Thbs2	NM_011581	Mus musculus thrombospondin 2 (Thbs2), mRNA [NM_011581]
CUST_11092_PI419772161	0.0135794	59.8176	down	S100a9	NM_009114	Mus musculus S100 calcium binding protein A9 (calgranulin B) (S100a9), mRNA [NM_009114]
CUST_12436_PI419772161	0.000274942	59.69	down	6330403K07Rik	NM_134022	Mus musculus RIKEN cDNA 6330403K07 gene (6330403K07Rik), mRNA [NM_134022]
CUST_8113_PI419772161	0.0101676	59.0549	down	Amotl2	NM_019764	Mus musculus angiomotin-like 2 (Amotl2), mRNA [NM_019764]
CUST_21617_PI419772161	0.00511741	58.5492	down	Zim1	NM_011769	Mus musculus zinc finger, imprinted 1 (Zim1), mRNA [NM_011769]
CUST_18202_PI419772161	0.030323	57.5587	down	Cpne2	NM_153507	Mus musculus copine II (Cpne2), mRNA [NM_153507]
CUST_19762_PI419772161	0.00125814	57.18	down	Spp1	NM_009263	Mus musculus secreted phosphoprotein 1 (Spp1), mRNA [NM_009263]
CUST_12859_PI419772161	0.0116805	56.7679	down	Cdt1	NM_026014	Mus musculus chromatin licensing and DNA replication factor 1 (Cdt1), mRNA [NM_026014]
CUST_20285_PI419772161	0.00661254	55.3741	down	Egr1	NM_007913	Mus musculus early growth response 1 (Egr1), mRNA [NM_007913]
CUST_19354_PI419772161	0.000112753	55.2519	down	Trpc3	NM_019510	Mus musculus transient receptor potential cation channel, subfamily C, member 3 (Trpc3), mRNA [NM_019510]
CUST_13207_PI419772161	0.00378834	55.1535	down	Cplx2	NM_009946	Mus musculus complexin 2 (Cplx2), mRNA [NM_009946]
CUST_6647_PI419772161	9.43282e-05	54.5753	down	Pcdh18	NM_130448	Mus musculus protocadherin 18 (Pcdh18), mRNA [NM_130448]
CUST_14573_PI419772161	0.0362389	53.0191	down	Hnrnpa1	NM_001039129	Mus musculus heterogeneous nuclear ribonucleoprotein A1 (Hnrnpa1), transcript variant 2, mRNA [NM_001039129]
CUST_19435_PI419772161	0.0171488	52.1502	down	Igfbp5	NM_010518	Mus musculus insulin-like growth factor binding protein 5 (Igfbp5), mRNA [NM_010518]
CUST_20055_PI419772161	0.00491667	51.6725	down	Papss1	NM_011863	Mus musculus 3'-phosphoadenosine 5'-phosphosulfate synthase 1 (Papss1), mRNA [NM_011863]
CUST_21178_PI419772161	0.00711269	51.0851	down	Mapk13	NM_011950	Mus musculus mitogen-activated protein kinase 13 (Mapk13), mRNA [NM_011950]
CUST_10407_PI419772161	0.00369197	49.7675	down	Hrk	NM_007545	Mus musculus harakiri, BCL2 interacting protein (contains only BH3 domain) (Hrk), mRNA [NM_007545]
CUST_10669_PI419772161	0.036244	48.9377	down	Adamts1	NM_009621	Mus musculus a disintegrin-like and metallopeptidase (reprolysin type) with thrombospondin type 1 motif, 1 (Adamts1), mRNA [NM_009621]
CUST_16163_PI419772161	0.00011169	48.6137	down	Tnfrsf11b	NM_008764	Mus musculus tumor necrosis factor receptor superfamily, member 11b (osteoprotegerin) (Tnfrsf11b), mRNA [NM_008764]
CUST_3571_PI419772161	0.00100622	48.5572	down	Creb5	NM_172728	Mus musculus cAMP responsive element binding protein 5 (Creb5), mRNA [NM_172728]
CUST_13581_PI419772161	0.00791513	48.3237	down	Maged1	NM_019791	Mus musculus melanoma antigen, family D, 1 (Maged1), mRNA [NM_019791]
CUST_15069_PI419772161	0.00123863	48.3153	down	Cables1	NM_022021	Mus musculus CDK5 and Abl enzyme substrate 1 (Cables1), transcript variant 2, mRNA [NM_022021]
CUST_10547_PI419772161	0.00678241	48.2204	down	Col5a2	NM_007737	Mus musculus collagen, type V, alpha 2 (Col5a2), mRNA [NM_007737]
CUST_21722_PI419772161	0.0276423	47.8645	down	Rasl12	NM_001033158	Mus musculus RAS-like, family 12 (Rasl12), transcript variant 1, mRNA [NM_001033158]
CUST_18659_PI419772161	0.0128038	47.0122	down	Lhx8	NM_010713	Mus musculus LIM homeobox protein 8 (Lhx8), mRNA [NM_010713]
CUST_19380_PI419772161	0.0105266	46.6904	down	Krt7	NM_033073	Mus musculus keratin 7 (Krt7), mRNA [NM_033073]
CUST_1782_PI419772161	0.00286042	45.9482	down	H1f0	NM_008197	Mus musculus H1 histone family, member 0 (H1f0), mRNA [NM_008197]
CUST_11321_PI419772161	0.000519653	45.4864	down	Slc1a6	NM_009200	Mus musculus solute carrier family 1 (high affinity aspartate/glutamate transporter), member 6 (Slc1a6), mRNA [NM_009200]
CUST_20881_PI419772161	0.00366493	45.3772	down	Gli3	NM_008130	Mus musculus GLI-Kruppel family member GLI3 (Gli3), mRNA [NM_008130]
CUST_4053_PI419772161	0.00153473	44.6949	down	Itm2a	NM_008409	Mus musculus integral membrane protein 2A (Itm2a), mRNA [NM_008409]
CUST_15160_PI419772161	0.0011913	44.5631	down	Cbln2	NM_172633	Mus musculus cerebellin 2 precursor protein (Cbln2), mRNA [NM_172633]
CUST_21033_PI419772161	0.0253814	44.4244	down	Afp	NM_007423	Mus musculus alpha fetoprotein (Afp), mRNA [NM_007423]
CUST_20594_PI419772161	0.00102342	44.421	down	Mybpc3	NM_008653	Mus musculus myosin binding protein C, cardiac (Mybpc3), mRNA [NM_008653]
CUST_17468_PI419772161	0.00140731	44.2099	down	Bhlhe22	NM_021560	Mus musculus basic helix-loop-helix family, member e22 (Bhlhe22), mRNA [NM_021560]
CUST_11129_PI419772161	0.00622823	44.1582	down	Col5a3	NM_016919	Mus musculus collagen, type V, alpha 3 (Col5a3), mRNA [NM_016919]
CUST_20362_PI419772161	0.0106874	43.9026	down	Mfap2	NM_008546	Mus musculus microfibrillar-associated protein 2 (Mfap2), transcript variant 1, mRNA [NM_008546]
CUST_19860_PI419772161	0.00458552	43.4274	down	Gnb5	NM_010313	Mus musculus guanine nucleotide binding protein (G protein), beta 5 (Gnb5), transcript variant 1, mRNA [NM_010313]
CUST_20454_PI419772161	0.0108643	43.4243	down	Nfatc2	NM_001136073	nuclear factor of activated T-cells,
CUST_7986_PI419772161	0.0143929	43.3206	down	Serpinh1	NM_001111044	serine (or cysteine) proteinase inhibitor, clade
CUST_17983_PI419772161	0.00234516	43.1294	down	Agtr2	NM_007429	Mus musculus angiotensin II receptor, type 2 (Agtr2), mRNA [NM_007429]
CUST_19277_PI419772161	0.00192049	42.6153	down	Dctd	NM_001161515	dCMP deaminase
CUST_10895_PI419772161	0.0105582	42.499	down	Arhgdig	NM_008113	Mus musculus Rho GDP dissociation inhibitor (GDI) gamma (Arhgdig), mRNA [NM_008113]
CUST_20495_PI419772161	0.00506996	42.4887	down	Tbx2	NM_009324	Mus musculus T-box 2 (Tbx2), mRNA [NM_009324]
CUST_14352_PI419772161	0.00402243	42.2621	down	Nrk	NM_013724	Mus musculus Nik related kinase (Nrk), mRNA [NM_013724]
CUST_4684_PI419772161	0.00454623	42.1089	down	Nt5dc2	NM_027289	Mus musculus 5'-nucleotidase domain containing 2 (Nt5dc2), mRNA [NM_027289]
CUST_17936_PI419772161	0.000369137	42.0755	down	Dlk1	NM_010052	Mus musculus delta-like 1 homolog (Drosophila) (Dlk1), mRNA [NM_010052]
CUST_16464_PI419772161	0.00212346	41.9748	down	Ppp1r16b	NM_153089	Mus musculus protein phosphatase 1, regulatory (inhibitor) subunit 16B (Ppp1r16b), transcript variant 2, mRNA [NM_153089]
CUST_20073_PI419772161	0.0110637	41.8685	down	Acp6	NM_019800	Mus musculus acid phosphatase 6, lysophosphatidic (Acp6), mRNA [NM_019800]
CUST_21183_PI419772161	0.000738091	41.6838	down	Hapln1	NM_013500	Mus musculus hyaluronan and proteoglycan link protein 1 (Hapln1), mRNA [NM_013500]
CUST_21667_PI419772161	0.012563	41.3643	down	Gabra3	NM_008067	Mus musculus gamma-aminobutyric acid (GABA) A receptor, subunit alpha 3 (Gabra3), mRNA [NM_008067]
CUST_8833_PI419772161	0.00103026	41.2384	down	Kazald1	NM_178929	Mus musculus Kazal-type serine peptidase inhibitor domain 1 (Kazald1), mRNA [NM_178929]
CUST_8064_PI419772161	0.000649091	41.1208	down	Angptl2	NM_011923	Mus musculus angiopoietin-like 2 (Angptl2), mRNA [NM_011923]
CUST_15070_PI419772161	0.00224773	41.1105	down	Cables1	NM_001146287	CDK5 and Abl enzyme substrate 1 isoform 1
CUST_1639_PI419772161	0.00249223	41.1035	down	Gdf10	NM_145741	Mus musculus growth differentiation factor 10 (Gdf10), mRNA [NM_145741]
CUST_15549_PI419772161	0.00194266	41.0503	down	D0H4S114	NM_001109989	neuronal protein 3.1
CUST_14082_PI419772161	0.0111794	40.6982	down	Sall2	NM_015772	Mus musculus sal-like 2 (Drosophila) (Sall2), mRNA [NM_015772]
CUST_1278_PI419772161	0.00022312	40.5108	down	Sept11	NM_001009818	Mus musculus septin 11
CUST_12914_PI419772161	0.00634469	40.3241	down	Tspan14	NM_145928	Mus musculus tetraspanin 14 (Tspan14), mRNA [NM_145928]
CUST_9296_PI419772161	0.00455331	40.2867	down	Acaa2	NM_177470	Mus musculus acetyl-Coenzyme A acyltransferase 2 (mitochondrial 3-oxoacyl-Coenzyme A thiolase) (Acaa2), nuclear gene encoding mitochondrial protein, mRNA [NM_177470]
CUST_21918_PI419772161	0.00285315	40.2687	down	Mov10	NM_008619	Mus musculus Moloney leukemia virus 10 (Mov10), transcript variant 2, mRNA [NM_008619]
CUST_19864_PI419772161	0.000809265	39.8753	down	Fstl1	NM_008047	Mus musculus follistatin-like 1 (Fstl1), mRNA [NM_008047]
CUST_9863_PI419772161	1.99244e-05	39.851	down	5430435G22Rik	NM_145509	Mus musculus RIKEN cDNA 5430435G22 gene (5430435G22Rik), mRNA [NM_145509]
CUST_8983_PI419772161	0.0123362	39.2468	down	Pycrl	NM_025412	Mus musculus pyrroline-5-carboxylate reductase-like (Pycrl), mRNA [NM_025412]
CUST_19979_PI419772161	0.00863272	39.2138	down	Gdnf	NM_010275	Mus musculus glial cell line derived neurotrophic factor (Gdnf), mRNA [NM_010275]
CUST_8007_PI419772161	0.00771087	38.878	down	Col23a1	NM_153393	Mus musculus collagen, type XXIII, alpha 1 (Col23a1), mRNA [NM_153393]
CUST_849_PI419772161	0.00344357	38.445	down	Ankrd56	NM_175270	Mus musculus ankyrin repeat domain 56 (Ankrd56), mRNA [NM_175270]
CUST_20470_PI419772161	0.00137901	38.4131	down	Mmp2	NM_008610	Mus musculus matrix metallopeptidase 2 (Mmp2), mRNA [NM_008610]
CUST_15546_PI419772161	0.000399804	38.3736	down	D0H4S114	NM_053078	Mus musculus DNA segment, human D4S114 (D0H4S114), transcript variant 1, mRNA [NM_053078]
CUST_8198_PI419772161	0.01316	38.3052	down	Crtc3	NM_173863	Mus musculus CREB regulated transcription coactivator 3 (Crtc3), mRNA [NM_173863]
CUST_8621_PI419772161	0.0187746	37.8143	down	Sh2d4a	NM_028182	Mus musculus SH2 domain containing 4A (Sh2d4a), mRNA [NM_028182]
CUST_10658_PI419772161	0.00587779	37.8073	down	Cxadr	NM_001025192	Mus musculus coxsackie virus and adenovirus receptor (Cxadr), transcript variant 1, mRNA [NM_001025192]
CUST_11272_PI419772161	0.000209165	37.5371	down	Tacr3	NM_021382	Mus musculus tachykinin receptor 3 (Tacr3), mRNA [NM_021382]
CUST_13036_PI419772161	0.02437	37.4575	down	Kank2	NM_145611	Mus musculus KN motif and ankyrin repeat domains 2 (Kank2), mRNA [NM_145611]
CUST_8545_PI419772161	0.00495511	37.3661	down	Cdh11	NM_009866	Mus musculus cadherin 11 (Cdh11), mRNA [NM_009866]
CUST_3755_PI419772161	3.06228e-07	37.3451	down	Tmem119	NM_146162	Mus musculus transmembrane protein 119 (Tmem119), mRNA [NM_146162]
CUST_20006_PI419772161	0.00211599	37.2862	down	Fzd2	NM_020510	Mus musculus frizzled homolog 2 (Drosophila) (Fzd2), mRNA [NM_020510]
CUST_12410_PI419772161	0.00970544	37.1942	down	Eid1	NM_025613	Mus musculus EP300 interacting inhibitor of differentiation 1 (Eid1), mRNA [NM_025613]
CUST_11779_PI419772161	0.0089431	37.0387	down	Taldo1	NM_011528	Mus musculus transaldolase 1 (Taldo1), mRNA [NM_011528]
CUST_19276_PI419772161	0.00176749	36.9231	down	Dctd	NM_178788	Mus musculus dCMP deaminase (Dctd), transcript variant 1, mRNA [NM_178788]
CUST_11313_PI419772161	0.00139406	36.7343	down	Lsp1	NM_019391	Mus musculus lymphocyte specific 1 (Lsp1), transcript variant 2, mRNA [NM_019391]
CUST_11660_PI419772161	0.00132246	36.7036	down	Cnn2	NM_007725	Mus musculus calponin 2 (Cnn2), mRNA [NM_007725]
CUST_15231_PI419772161	0.000588146	36.4175	down	Lrfn2	NM_027452	Mus musculus leucine rich repeat and fibronectin type III domain containing 2 (Lrfn2), mRNA [NM_027452]
CUST_17372_PI419772161	0.00278931	36.3913	down	Atf3	NM_007498	Mus musculus activating transcription factor 3 (Atf3), mRNA [NM_007498]
CUST_15317_PI419772161	0.00108677	35.9759	down	Adcyap1r1	NM_001025372	adenylate cyclase activating polypeptide 1
CUST_48_PI419772161	0.00437013	35.7798	down	Dleu7	NM_173419	Mus musculus deleted in lymphocytic leukemia, 7 (Dleu7), mRNA [NM_173419]
CUST_15196_PI419772161	0.000313247	35.7776	down	Cadm3	NM_053199	Mus musculus cell adhesion molecule 3 (Cadm3), mRNA [NM_053199]
CUST_18355_PI419772161	0.00759078	35.7549	down	Pth1r	NM_011199	Mus musculus parathyroid hormone 1 receptor (Pth1r), transcript variant 1, mRNA [NM_011199]
CUST_21702_PI419772161	4.53555e-05	35.6799	down	Pdlim4	NM_019417	Mus musculus PDZ and LIM domain 4 (Pdlim4), mRNA [NM_019417]
CUST_15547_PI419772161	5.07106e-05	35.5659	down	D0H4S114	NM_001109988	neuronal protein 3.1
CUST_20592_PI419772161	0.00872021	35.5198	down	Tnni3	NM_009406	Mus musculus troponin I, cardiac 3 (Tnni3), mRNA [NM_009406]
CUST_14839_PI419772161	0.000560655	35.3816	down	Hsd11b2	NM_008289	Mus musculus hydroxysteroid 11-beta dehydrogenase 2 (Hsd11b2), mRNA [NM_008289]
CUST_13729_PI419772161	0.000192149	35.1672	down	Tsen2	NM_199033	Mus musculus tRNA splicing endonuclease 2 homolog (S. cerevisiae) (Tsen2), mRNA [NM_199033]
CUST_18437_PI419772161	0.000200486	34.9155	down	Sfrp2	NM_009144	Mus musculus secreted frizzled-related protein 2 (Sfrp2), mRNA [NM_009144]
CUST_15302_PI419772161	0.000338956	34.515	down	Epha1	NM_023580	Mus musculus Eph receptor A1 (Epha1), mRNA [NM_023580]
CUST_209_PI419772161	0.0112228	34.5048	down	Klhdc8b	NM_030075	Mus musculus kelch domain containing 8B (Klhdc8b), mRNA [NM_030075]
CUST_5244_PI419772161	0.0350539	34.3335	down	Rap2c	NM_172413	Mus musculus RAP2C, member of RAS oncogene family (Rap2c), mRNA [NM_172413]
CUST_17899_PI419772161	0.00338136	34.2965	down	Ptger3	NM_011196	Mus musculus prostaglandin E receptor 3 (subtype EP3) (Ptger3), mRNA [NM_011196]
CUST_12351_PI419772161	0.0025087	34.1886	down	Cdca7	NM_025866	Mus musculus cell division cycle associated 7 (Cdca7), mRNA [NM_025866]
CUST_16281_PI419772161	0.000381669	34.0417	down	Necab1	NM_178617	Mus musculus N-terminal EF-hand calcium binding protein 1 (Necab1), mRNA [NM_178617]
CUST_19410_PI419772161	0.00948009	33.868	down	Gstm2	NM_008183	Mus musculus glutathione S-transferase, mu 2 (Gstm2), mRNA [NM_008183]
CUST_13147_PI419772161	0.00487082	33.6417	down	Ptrf	NM_008986	Mus musculus polymerase I and transcript release factor (Ptrf), mRNA [NM_008986]
CUST_15962_PI419772161	0.000386792	33.4794	down	Efna5	NM_010109	Mus musculus ephrin A5 (Efna5), transcript variant 2, mRNA [NM_010109]
CUST_9026_PI419772161	0.00103079	33.4708	down	Nmt2	NM_008708	Mus musculus N-myristoyltransferase 2 (Nmt2), mRNA [NM_008708]
CUST_21303_PI419772161	0.0328989	33.2938	down	Fabp4	NM_024406	Mus musculus fatty acid binding protein 4, adipocyte (Fabp4), mRNA [NM_024406]
CUST_17064_PI419772161	0.00297639	33.0141	down	Pitx1	NM_011097	Mus musculus paired-like homeodomain transcription factor 1 (Pitx1), mRNA [NM_011097]
CUST_5635_PI419772161	0.034944	32.9992	down	Rhbdf2	NM_172572	Mus musculus rhomboid 5 homolog 2 (Drosophila) (Rhbdf2), transcript variant 1, mRNA [NM_172572]
CUST_11539_PI419772161	0.000948553	32.8083	down	Dpt	NM_019759	Mus musculus dermatopontin (Dpt), mRNA [NM_019759]
CUST_20191_PI419772161	0.00106583	32.5788	down	Ndn	NM_010882	Mus musculus necdin (Ndn), mRNA [NM_010882]
CUST_2750_PI419772161	0.00183157	32.5266	down	Psrc1	NM_019976	Mus musculus proline/serine-rich coiled-coil 1 (Psrc1), mRNA [NM_019976]
CUST_13256_PI419772161	0.000352645	32.5091	down	Cdh10	NM_009865	Mus musculus cadherin 10 (Cdh10), mRNA [NM_009865]
CUST_4715_PI419772161	0.00522344	32.5062	down	Maged2	NM_030700	Mus musculus melanoma antigen, family D, 2 (Maged2), mRNA [NM_030700]
CUST_14224_PI419772161	0.0013194	32.4862	down	Kcnj4	NM_008427	Mus musculus potassium inwardly-rectifying channel, subfamily J, member 4 (Kcnj4), mRNA [NM_008427]
CUST_20488_PI419772161	0.00753011	32.382	down	Matn2	NM_016762	Mus musculus matrilin 2 (Matn2), mRNA [NM_016762]
CUST_18354_PI419772161	4.59466e-05	32.3712	down	Sp5	NM_022435	Mus musculus trans-acting transcription factor 5 (Sp5), mRNA [NM_022435]
CUST_20322_PI419772161	0.00672508	32.1084	down	Ptpn11	NM_011202	Mus musculus protein tyrosine phosphatase, non-receptor type 11 (Ptpn11), transcript variant 1, mRNA [NM_011202]
CUST_11853_PI419772161	0.00205929	32.0859	down	Hmgb3	NM_008253	Mus musculus high mobility group box 3 (Hmgb3), mRNA [NM_008253]
CUST_21674_PI419772161	0.0217943	31.8356	down	Dguok	NM_013764	Mus musculus deoxyguanosine kinase (Dguok), nuclear gene encoding mitochondrial protein, transcript variant 1, mRNA [NM_013764]
CUST_13878_PI419772161	0.00127088	31.7225	down	Hsd17b1	NM_010475	Mus musculus hydroxysteroid (17-beta) dehydrogenase 1 (Hsd17b1), mRNA [NM_010475]
CUST_22075_PI419772161	0.00275817	31.6625	down	Exosc8	NM_027148	Mus musculus exosome component 8 (Exosc8), transcript variant 2, mRNA [NM_027148]
CUST_4297_PI419772161	0.0278865	31.6516	down	Morc1	NM_010816	Mus musculus microrchidia 1 (Morc1), mRNA [NM_010816]
CUST_15610_PI419772161	0.000400759	31.4915	down	Col3a1	NM_009930	Mus musculus collagen, type III, alpha 1 (Col3a1), mRNA [NM_009930]
CUST_4344_PI419772161	0.00642585	31.4496	down	Zfp182	NM_001111076	Mus musculus zinc finger protein 182 (Zfp182), transcript variant 2, mRNA [NM_001111076]
CUST_10563_PI419772161	0.0147518	31.3761	down	Fbln2	NM_001081437	fibulin 2 isoform b
CUST_11085_PI419772161	0.0392059	31.1906	down	Dennd2a	NM_172477	Mus musculus DENN/MADD domain containing 2A (Dennd2a), mRNA [NM_172477]
CUST_7465_PI419772161	0.00426674	31.1023	down	Hoxb7	NM_010460	Mus musculus homeobox B7 (Hoxb7), mRNA [NM_010460]
CUST_10503_PI419772161	0.0152852	30.9467	down	Tpbg	NM_011627	Mus musculus trophoblast glycoprotein (Tpbg), transcript variant 1, mRNA [NM_011627]
CUST_8870_PI419772161	0.04581	30.8563	down	2300002M23Rik	NM_175148	Mus musculus RIKEN cDNA 2300002M23 gene (2300002M23Rik), mRNA [NM_175148]
CUST_18772_PI419772161	0.00106052	30.7933	down	Gm879	NM_001034874	hypothetical protein LOC380702
CUST_3783_PI419772161	0.00823487	30.5535	down	Csdc2	NM_145473	Mus musculus cold shock domain containing C2, RNA binding (Csdc2), mRNA [NM_145473]
CUST_15314_PI419772161	0.00123982	30.4648	down	Adcyap1r1	NM_007407	Mus musculus adenylate cyclase activating polypeptide 1 receptor 1 (Adcyap1r1), transcript variant 1, mRNA [NM_007407]
CUST_18773_PI419772161	0.0448864	30.3123	down	Acot2	NM_134188	Mus musculus acyl-CoA thioesterase 2 (Acot2), nuclear gene encoding mitochondrial protein, mRNA [NM_134188]
CUST_19599_PI419772161	0.00531437	30.1142	down	Mcm2	NM_008564	Mus musculus minichromosome maintenance deficient 2 mitotin (S. cerevisiae) (Mcm2), mRNA [NM_008564]
CUST_14086_PI419772161	0.0426419	30.1109	down	Cxcl14	NM_019568	Mus musculus chemokine (C-X-C motif) ligand 14 (Cxcl14), mRNA [NM_019568]
CUST_10693_PI419772161	0.000301394	30.0754	down	Pcbd1	NM_025273	Mus musculus pterin 4 alpha carbinolamine dehydratase/dimerization cofactor of hepatocyte nuclear factor 1 alpha (TCF1) 1 (Pcbd1), mRNA [NM_025273]
CUST_20336_PI419772161	0.00407273	30.0405	down	Ptpn11	NM_001109992	Mus musculus protein tyrosine phosphatase, non-receptor type 11 (Ptpn11), transcript variant 2, mRNA [NM_001109992]
CUST_1713_PI419772161	0.00860162	30.0087	down	Popdc3	NM_024286	Mus musculus popeye domain containing 3 (Popdc3), mRNA [NM_024286]
CUST_10616_PI419772161	0.000613519	29.9969	down	Col6a2	NM_146007	Mus musculus collagen, type VI, alpha 2 (Col6a2), mRNA [NM_146007]
CUST_15267_PI419772161	0.000597323	29.9015	down	Lrfn3	NM_175478	Mus musculus leucine rich repeat and fibronectin type III domain containing 3 (Lrfn3), mRNA [NM_175478]
CUST_6751_PI419772161	0.000588832	29.783	down	Obsl1	NM_178884	Mus musculus obscurin-like 1 (Obsl1), mRNA [NM_178884]
CUST_15786_PI419772161	0.00281845	29.7205	down	Eif4a1	NM_001159375	Mus musculus eukaryotic translation initiation factor 4A1
CUST_18359_PI419772161	0.0096674	29.6556	down	Pth1r	NM_001083936	Mus musculus parathyroid hormone receptor 1
CUST_15551_PI419772161	0.000220322	29.5908	down	D0H4S114	NM_001109990	Mus musculus neuronal protein 3.1
CUST_21538_PI419772161	0.000582846	29.5838	down	Ccnd1	NM_007631	Mus musculus cyclin D1
CUST_10565_PI419772161	0.00126709	29.4771	down	Bex2	NM_009749	Mus musculus brain expressed X-linked 2 (Bex2), mRNA [NM_009749]
CUST_15975_PI419772161	0.00492889	29.3929	down	Grip2	NM_001159507	Mus musculus glutamate receptor interacting protein 2 (Grip2), mRNA [NM_001159507]
CUST_18357_PI419772161	0.00442891	29.3101	down	Hhip	NM_020259	Mus musculus Hedgehog-interacting protein (Hhip), mRNA [NM_020259]
CUST_20819_PI419772161	0.0174276	29.2496	down	Met	NM_008591	Mus musculus met proto-oncogene (Met), mRNA [NM_008591]
CUST_13732_PI419772161	0.00323468	29.2471	down	Adprhl2	NM_133883	Mus musculus ADP-ribosylhydrolase like 2 (Adprhl2), nuclear gene encoding mitochondrial protein, mRNA [NM_133883]
CUST_11353_PI419772161	0.00405806	29.1919	down	Patz1	NM_019574	Mus musculus POZ (BTB) and AT hook containing zinc finger 1 (Patz1), mRNA [NM_019574]
CUST_1381_PI419772161	0.0142064	28.9889	down	Stard3nl	NM_024270	Mus musculus STARD3 N-terminal like (Stard3nl), mRNA [NM_024270]
CUST_16467_PI419772161	0.00021803	28.9753	down	Wisp1	NM_018865	Mus musculus WNT1 inducible signaling pathway protein 1 (Wisp1), mRNA [NM_018865]
CUST_18363_PI419772161	0.00775175	28.9168	down	Pth1r	NM_001083935	Mus musculus hormone receptor 1
CUST_11364_PI419772161	0.00207468	28.8178	down	Mmp11	NM_008606	Mus musculus matrix metallopeptidase 11 (Mmp11), mRNA [NM_008606]
CUST_558_PI419772161	0.0412832	28.8052	down	S100z	NM_001081159	Mus musculus S100 calcium binding protein, zeta
CUST_9346_PI419772161	0.00429736	28.6546	down	Akr1b7	NM_009731	Mus musculus aldo-keto reductase family 1, member B7 (Akr1b7), mRNA [NM_009731]
CUST_17478_PI419772161	0.0206119	28.5765	down	Ntf5	NM_198190	Mus musculus neurotrophin 5 (Ntf5), mRNA [NM_198190]
CUST_11299_PI419772161	0.0319894	28.4912	down	Rassf3	NM_138956	Mus musculus Ras association (RalGDS/AF-6) domain family member 3 (Rassf3), mRNA [NM_138956]
CUST_21700_PI419772161	0.0173501	28.4304	down	Shbg	NM_011367	Mus musculus sex hormone binding globulin (Shbg), mRNA [NM_011367]
CUST_16453_PI419772161	0.0130866	28.2976	down	Rprm	NM_023396	Mus musculus reprimo, TP53 dependent G2 arrest mediator candidate (Rprm), mRNA [NM_023396]
CUST_7420_PI419772161	0.00333694	28.1673	down	X99384	NM_013753	Mus musculus cDNA sequence X99384 (X99384), mRNA [NM_013753]
CUST_22408_PI419772161	0.00513184	28.1388	down	Vamp8	NM_016794	Mus musculus vesicle-associated membrane protein 8 (Vamp8), mRNA [NM_016794]
CUST_16465_PI419772161	0.00344516	28.0631	down	Ppp1r16b	NM_001159662	Mus musculus protein phosphatase 1, regulatory (inhibitor) subunit 16B (Ppp1r16b), transcript variant 1, mRNA [NM_001159662]
CUST_16345_PI419772161	0.00785045	28.0603	down	B3gat3	NM_024256	Mus musculus beta-1,3-glucuronyltransferase 3 (glucuronosyltransferase I) (B3gat3), mRNA [NM_024256]
CUST_17257_PI419772161	0.0036411	28.0064	down	Ctsd	NM_009983	Mus musculus cathepsin D (Ctsd), mRNA [NM_009983]
CUST_16660_PI419772161	0.0014333	27.9903	down	Twist2	NM_007855	Mus musculus twist homolog 2 (Drosophila) (Twist2), mRNA [NM_007855]
CUST_19797_PI419772161	0.000693194	27.8995	down	Fam64a	NM_144526	Mus musculus family with sequence similarity 64, member A (Fam64a), mRNA [NM_144526]
CUST_11817_PI419772161	0.00179535	27.8852	down	Athl1	NM_145387	Mus musculus ATH1, acid trehalase-like 1 (yeast) (Athl1), mRNA [NM_145387]
CUST_11346_PI419772161	0.0113349	27.834	down	Moxd1	NM_021509	Mus musculus monooxygenase, DBH-like 1 (Moxd1), mRNA [NM_021509]
CUST_4602_PI419772161	0.00779583	27.7892	down	Ndufs6	NM_010888	Mus musculus NADH dehydrogenase (ubiquinone) Fe-S protein 6 (Ndufs6), nuclear gene encoding mitochondrial protein, transcript variant 1, mRNA [NM_010888]
CUST_15963_PI419772161	0.000555058	27.7764	down	Efna5	NM_207654	Mus musculus ephrin A5 (Efna5), transcript variant 1, mRNA [NM_207654]
CUST_17909_PI419772161	0.000372171	27.7629	down	Heyl	NM_013905	Mus musculus hairy/enhancer-of-split related with YRPW motif-like (Heyl), mRNA [NM_013905]
CUST_13075_PI419772161	0.00158188	27.6694	down	Fap	NM_007986	Mus musculus fibroblast activation protein (Fap), mRNA [NM_007986]
CUST_20738_PI419772161	0.00140442	27.6001	down	Clec2l	NM_001101507	Mus musculus C-type lectin domain family, member L (Clec2l), mRNA [NM_001101507]
CUST_18381_PI419772161	0.000116573	27.5541	down	Pappa	NM_021362	Mus musculus pregnancy-associated plasma protein A (Pappa), mRNA [NM_021362]
CUST_18301_PI419772161	0.00336549	27.5343	down	Ptprz1	NM_001081306	Mus musculus protein tyrosine phosphatase, receptor type Z, polypeptide 1 (Ptprz1), mRNA [NM_001081306]
CUST_18050_PI419772161	0.00308593	27.5113	down	Ahnak	NM_009643	Mus musculus AHNAK nucleoprotein (desmoyokin) (Ahnak), transcript variant 1, mRNA [NM_009643]
CUST_9993_PI419772161	0.0187549	27.4593	down	Rgs11	NM_001081069	Mus musculus regulator of G-protein signaling 11 (Rgs11), mRNA [NM_001081069]
CUST_15923_PI419772161	0.0349332	27.4108	down	Ppp2r5d	NM_009358	Mus musculus protein phosphatase 2, regulatory subunit B (B56), delta isoform (Ppp2r5d), mRNA [NM_009358]
CUST_11748_PI419772161	0.0369008	27.3813	down	Blmh	NM_178645	Mus musculus bleomycin hydrolase (Blmh), mRNA [NM_178645]
CUST_15188_PI419772161	0.00126144	27.0992	down	Fbxo32	NM_026346	Mus musculus F-box protein 32 (Fbxo32), mRNA [NM_026346]
CUST_19632_PI419772161	1.99193e-05	27.0845	down	Scx	NM_198885	Mus musculus scleraxis (Scx), mRNA [NM_198885]
CUST_15585_PI419772161	0.000531854	27.0752	down	Glis2	NM_031184	Mus musculus GLIS family zinc finger 2 (Glis2), mRNA [NM_031184]
CUST_12888_PI419772161	0.00775264	27.0568	down	Wfdc2	NM_026323	Mus musculus WAP four-disulfide core domain 2 (Wfdc2), mRNA [NM_026323]
CUST_21414_PI419772161	0.000199602	27.0406	down	Eln	NM_007925	Mus musculus elastin (Eln), mRNA [NM_007925]
CUST_10018_PI419772161	0.00258189	26.9889	down	Myo9b	NM_015742	Mus musculus myosin IXb (Myo9b), transcript variant 3, mRNA [NM_015742]
CUST_7099_PI419772161	0.00876139	26.9679	down	Gpn3	NM_024216	Mus musculus GPN-loop GTPase 3 (Gpn3), mRNA [NM_024216]
CUST_20818_PI419772161	0.00346753	26.9011	down	Cask	NM_009806	Mus musculus calcium/calmodulin-dependent serine protein kinase (MAGUK family) (Cask), mRNA [NM_009806]
CUST_15785_PI419772161	0.00138734	26.8653	down	Eif4a1	NM_144958	Mus musculus eukaryotic translation initiation factor 4A1 (Eif4a1), transcript variant 1, mRNA [NM_144958]
CUST_18724_PI419772161	0.00238352	26.8407	down	Gm1631	NM_201366	Mus musculus predicted gene 1631 (Gm1631), mRNA [NM_201366]
CUST_1167_PI419772161	0.00373763	26.7995	down	Bst2	NM_198095	Mus musculus bone marrow stromal cell antigen 2 (Bst2), mRNA [NM_198095]
CUST_20310_PI419772161	0.000258426	26.7728	down	Lfng	NM_008494	Mus musculus LFNG O-fucosylpeptide 3-beta-N-acetylglucosaminyltransferase (Lfng), mRNA [NM_008494]
CUST_12521_PI419772161	0.017135	26.7558	down	Klk10	NM_133712	Mus musculus kallikrein related-peptidase 10 (Klk10), mRNA [NM_133712]
CUST_1786_PI419772161	0.00734275	26.727	down	Sorcs2	NM_030889	Mus musculus sortilin-related VPS10 domain containing receptor 2 (Sorcs2), mRNA [NM_030889]
CUST_18756_PI419772161	0.00854666	26.681	down	Jmjd7	NM_001114637	Mus musculus jumonji domain containing 7 (Jmjd7), mRNA [NM_001114637]
CUST_8938_PI419772161	0.00591495	26.68	down	C1ra	NM_023143	Mus musculus complement component 1, r subcomponent A (C1ra), mRNA [NM_023143]
CUST_1703_PI419772161	0.000268888	26.6562	down	Zfp30	NM_013705	Mus musculus zinc finger protein 30 (Zfp30), mRNA [NM_013705]
CUST_21670_PI419772161	0.000593255	26.648	down	Efna2	NM_007909	Mus musculus ephrin A2 (Efna2), mRNA [NM_007909]
CUST_19960_PI419772161	0.00295682	26.5956	down	Hsp90ab1	NM_008302	Mus musculus heat shock protein 90 alpha (cytosolic), class B member 1 (Hsp90ab1), mRNA [NM_008302]
CUST_13727_PI419772161	0.0185589	26.4497	down	Alkbh2	NM_175016	Mus musculus alkB, alkylation repair homolog 2 (E. coli) (Alkbh2), mRNA [NM_175016]
CUST_266_PI419772161	0.00146146	26.3694	down	Ccdc68	NM_201362	Mus musculus coiled-coil domain containing 68 (Ccdc68), mRNA [NM_201362]
CUST_592_PI419772161	0.000988129	26.3514	down	Mex3a	NM_001029890	Mus musculus mex3 homolog A (C. elegans) (Mex3a), mRNA [NM_001029890]
CUST_17842_PI419772161	0.00571186	26.3422	down	Pdia2	NM_001081070	Mus musculus protein disulfide isomerase associated 2 (Pdia2), mRNA [NM_001081070]
CUST_21579_PI419772161	0.000725114	26.3223	down	Bmp2	NM_007553	Mus musculus bone morphogenetic protein 2 (Bmp2), mRNA [NM_007553]
CUST_20776_PI419772161	0.000465935	26.2865	down	Gli1	NM_010296	Mus musculus GLI-Kruppel family member GLI1 (Gli1), mRNA [NM_010296]
CUST_16268_PI419772161	0.00405802	26.2849	down	Ephb4	NM_010144	Mus musculus Eph receptor B4 (Ephb4), transcript variant 2, mRNA [NM_010144]
CUST_21366_PI419772161	0.00140334	26.2734	down	Lpcat2	NM_173014	Mus musculus lysophosphatidylcholine acyltransferase 2 (Lpcat2), mRNA [NM_173014]
CUST_16132_PI419772161	0.0069156	26.2691	down	B4galt1	NM_022305	Mus musculus UDP-Gal:betaGlcNAc beta 1,4- galactosyltransferase, polypeptide 1 (B4galt1), mRNA [NM_022305]
CUST_10529_PI419772161	0.0206115	26.2659	down	Krt12	NM_010661	Mus musculus keratin 12 (Krt12), mRNA [NM_010661]
CUST_16518_PI419772161	0.00326617	26.1812	down	Esrp1	NM_194055	Mus musculus epithelial splicing regulatory protein 1 (Esrp1), mRNA [NM_194055]
CUST_22206_PI419772161	0.00418945	26.181	down	Tcf19	NM_025674	Mus musculus transcription factor 19 (Tcf19), transcript variant 3, mRNA [NM_025674]
CUST_926_PI419772161	0.00488529	26.0392	down	BC028528	NM_153513	hypothetical protein LOC229600
CUST_6634_PI419772161	0.000446502	26.0317	down	Cnn3	NM_028044	Mus musculus calponin 3, acidic (Cnn3), mRNA [NM_028044]
CUST_15149_PI419772161	0.0016369	25.9788	down	Lingo2	NM_175516	Mus musculus leucine rich repeat and Ig domain containing 2 (Lingo2), transcript variant 3, mRNA [NM_175516]
CUST_17260_PI419772161	0.0098144	25.9544	down	Evc	NM_021292	Mus musculus Ellis van Creveld gene homolog (human) (Evc), mRNA [NM_021292]
CUST_21701_PI419772161	0.000390908	25.8454	down	Hif3a	NM_016868	Mus musculus hypoxia inducible factor 3, alpha subunit (Hif3a), transcript variant 2, mRNA [NM_016868]
CUST_16269_PI419772161	0.00203538	25.7387	down	Ephb4	NM_001159571	Eph receptor B4 isoform a
CUST_21894_PI419772161	0.00338928	25.7205	down	Flrt2	NM_201518	Mus musculus fibronectin leucine rich transmembrane protein 2 (Flrt2), mRNA [NM_201518]
CUST_11301_PI419772161	0.0299018	25.6756	down	Osbpl5	NM_024289	Mus musculus oxysterol binding protein-like 5 (Osbpl5), mRNA [NM_024289]
CUST_12906_PI419772161	0.000329645	25.6613	down	Tspan9	NM_175414	Mus musculus tetraspanin 9 (Tspan9), mRNA [NM_175414]
CUST_15662_PI419772161	0.00617301	25.632	down	Sall4	NM_175303	Mus musculus sal-like 4 (Drosophila) (Sall4), transcript variant a, mRNA [NM_175303]
CUST_10133_PI419772161	0.0172029	25.5222	down	Tpm4	NM_001001491	Mus musculus tropomyosin 4 (Tpm4), mRNA [NM_001001491]
CUST_5614_PI419772161	0.00691491	25.4802	down	Sh3bgr	NM_015825	Mus musculus SH3-binding domain glutamic acid-rich protein (Sh3bgr), mRNA [NM_015825]
CUST_2757_PI419772161	0.0108659	25.4643	down	Wbp5	NM_011712	Mus musculus WW domain binding protein 5 (Wbp5), mRNA [NM_011712]
CUST_20750_PI419772161	0.00267806	25.2684	down	Pdgfra	NM_001083316	platelet-derived growth factor receptor alpha
CUST_11609_PI419772161	0.00459458	25.1846	down	Tmem63a	NM_144794	Mus musculus transmembrane protein 63a (Tmem63a), mRNA [NM_144794]
CUST_13236_PI419772161	0.000980547	25.1389	down	Aqp5	NM_009701	Mus musculus aquaporin 5 (Aqp5), mRNA [NM_009701]
CUST_20756_PI419772161	0.00215742	25.091	down	Ephb2	NM_010142	Mus musculus Eph receptor B2 (Ephb2), mRNA [NM_010142]
CUST_20043_PI419772161	0.000730015	25.0378	down	Prss12	NM_008939	Mus musculus protease, serine, 12 neurotrypsin (motopsin) (Prss12), mRNA [NM_008939]
CUST_17635_PI419772161	5.91275e-05	25.032	down	Usp13	NM_001013024	Mus musculus ubiquitin specific peptidase 13 (isopeptidase T-3) (Usp13), mRNA [NM_001013024]
CUST_19278_PI419772161	0.00404687	25.0192	down	Dctd	NM_001161516	dCMP deaminase
CUST_9744_PI419772161	0.00429919	25.0122	down	Dars	NM_145507	Mus musculus aspartyl-tRNA synthetase (Dars), transcript variant 2, mRNA [NM_145507]
CUST_5809_PI419772161	0.0373701	24.9897	down	2810417H13Rik	NM_026515	Mus musculus RIKEN cDNA 2810417H13 gene (2810417H13Rik), mRNA [NM_026515]
CUST_20126_PI419772161	0.000775689	24.8947	down	Wif1	NM_011915	Mus musculus Wnt inhibitory factor 1 (Wif1), mRNA [NM_011915]
CUST_12511_PI419772161	0.00596696	24.8681	down	Dync1li1	NM_146229	Mus musculus dynein cytoplasmic 1 light intermediate chain 1 (Dync1li1), mRNA [NM_146229]
CUST_12206_PI419772161	0.030891	24.8439	down	2410042D21Rik	NM_024254	Mus musculus RIKEN cDNA 2410042D21 gene (2410042D21Rik), mRNA [NM_024254]
CUST_6107_PI419772161	0.000973324	24.8424	down	Hist1h3h	NM_178206	histone cluster 1, H3h
CUST_18874_PI419772161	0.00341865	24.8109	down	Lpar4	NM_175271	Mus musculus lysophosphatidic acid receptor 4 (Lpar4), mRNA [NM_175271]
CUST_11895_PI419772161	0.0111544	24.8107	down	Hpcal1	NM_016677	Mus musculus hippocalcin-like 1 (Hpcal1), mRNA [NM_016677]
CUST_14139_PI419772161	0.0131713	24.7274	down	Rarres2	NM_027852	Mus musculus retinoic acid receptor responder (tazarotene induced) 2 (Rarres2), mRNA [NM_027852]
CUST_20604_PI419772161	0.000847391	24.7224	down	Slc16a2	NM_009197	Mus musculus solute carrier family 16 (monocarboxylic acid transporters), member 2 (Slc16a2), mRNA [NM_009197]
CUST_18512_PI419772161	0.000386133	24.7101	down	Nedd9	NM_001111324	neural precursor cell expressed, developmentally
CUST_7363_PI419772161	0.00121732	24.6943	down	Zfp467	NM_020589	Mus musculus zinc finger protein 467 (Zfp467), transcript variant 1, mRNA [NM_020589]
CUST_322_PI419772161	0.00121924	24.6816	down	Samd14	NM_146025	Mus musculus sterile alpha motif domain containing 14 (Samd14), transcript variant 1, mRNA [NM_146025]
CUST_12456_PI419772161	0.0124722	24.6065	down	Ptn	NM_008973	Mus musculus pleiotrophin (Ptn), mRNA [NM_008973]
CUST_12395_PI419772161	0.00920234	24.5741	down	C1qtnf2	NM_026979	Mus musculus C1q and tumor necrosis factor related protein 2 (C1qtnf2), mRNA [NM_026979]
CUST_15477_PI419772161	0.00107724	24.5332	down	Bcl11b	NM_001079883	Mus musculus B-cell leukemia/lymphoma 11B (Bcl11b), transcript variant 1, mRNA [NM_001079883]
CUST_2259_PI419772161	0.00775522	24.514	down	Cyp4f16	NM_024442	Mus musculus cytochrome P450, family 4, subfamily f, polypeptide 16 (Cyp4f16), mRNA [NM_024442]
CUST_4261_PI419772161	0.0113793	24.5119	down	Prickle3	NM_175097	Mus musculus prickle homolog 3 (Drosophila) (Prickle3), mRNA [NM_175097]
CUST_9272_PI419772161	0.0267725	24.4908	down	Alg1	NM_145362	Mus musculus asparagine-linked glycosylation 1 homolog (yeast, beta-1,4-mannosyltransferase) (Alg1), mRNA [NM_145362]
CUST_6859_PI419772161	0.00948742	24.2434	down	Ngef	NM_001111314	neuronal guanine nucleotide exchange factor
CUST_14491_PI419772161	3.00889e-05	24.221	down	Col5a1	NM_015734	Mus musculus collagen, type V, alpha 1 (Col5a1), mRNA [NM_015734]
CUST_10112_PI419772161	0.0177677	24.2114	down	Efemp2	NM_021474	Mus musculus epidermal growth factor-containing fibulin-like extracellular matrix protein 2 (Efemp2), transcript variant 1, mRNA [NM_021474]
CUST_20744_PI419772161	0.000928023	24.0955	down	Pdgfra	NM_011058	Mus musculus platelet derived growth factor receptor, alpha polypeptide (Pdgfra), transcript variant 1, mRNA [NM_011058]
CUST_2215_PI419772161	0.0207894	24.0592	down	Zfp777	NM_001081382	Mus musculus zinc finger protein 777 (Zfp777), mRNA [NM_001081382]
CUST_14058_PI419772161	0.00370719	24.0591	down	Prom2	NM_138750	Mus musculus prominin 2 (Prom2), transcript variant 1, mRNA [NM_138750]
CUST_19436_PI419772161	0.00342631	24.0271	down	Rspo3	NM_028351	Mus musculus R-spondin 3 homolog (Xenopus laevis) (Rspo3), mRNA [NM_028351]
CUST_9914_PI419772161	0.000884975	24.0175	down	Prrx2	NM_009116	paired related homeobox 2
CUST_16130_PI419772161	0.010942	23.9929	down	Slc27a4	NM_011989	Mus musculus solute carrier family 27 (fatty acid transporter), member 4 (Slc27a4), mRNA [NM_011989]
CUST_912_PI419772161	0.00201026	23.8649	down	Gsg1l	NM_001101488	Mus musculus GSG1-like (Gsg1l), mRNA [NM_001101488]
CUST_10938_PI419772161	0.000638096	23.8636	down	Col8a2	NM_199473	Mus musculus collagen, type VIII, alpha 2 (Col8a2), mRNA [NM_199473]
CUST_2794_PI419772161	0.00430583	23.8548	down	Depdc1a	NM_029523	Mus musculus DEP domain containing 1a (Depdc1a), transcript variant 2, mRNA [NM_029523]
CUST_11169_PI419772161	0.0038114	23.8496	down	Plscr1	NM_011636	Mus musculus phospholipid scramblase 1 (Plscr1), mRNA [NM_011636]
CUST_19378_PI419772161	0.00139768	23.8342	down	Tmem27	NM_020626	Mus musculus transmembrane protein 27 (Tmem27), mRNA [NM_020626]
CUST_18667_PI419772161	0.00974474	23.8281	down	Arnt2	NM_007488	Mus musculus aryl hydrocarbon receptor nuclear translocator 2 (Arnt2), mRNA [NM_007488]
CUST_17891_PI419772161	0.00122173	23.7727	down	Ccdc80	NM_026439	Mus musculus coiled-coil domain containing 80 (Ccdc80), mRNA [NM_026439]
CUST_5795_PI419772161	0.00228029	23.7716	down	Dcaf4	NM_030246	Mus musculus DDB1 and CUL4 associated factor 4 (Dcaf4), transcript variant 2, mRNA [NM_030246]
CUST_20618_PI419772161	0.000195465	23.7457	down	Mest	NM_008590	Mus musculus mesoderm specific transcript (Mest), mRNA [NM_008590]
CUST_16071_PI419772161	0.00107713	23.7338	down	Efnb3	NM_007911	Mus musculus ephrin B3 (Efnb3), mRNA [NM_007911]
CUST_18919_PI419772161	0.004253	23.7286	down	Fam38b	NM_001039485	Mus musculus family with sequence similarity 38, member B (Fam38b), mRNA [NM_001039485]
CUST_4383_PI419772161	0.000712875	23.7179	down	Ncald	NM_134094	Mus musculus neurocalcin delta (Ncald), transcript variant 1, mRNA [NM_134094]
CUST_15948_PI419772161	0.00293601	23.7077	down	Gsr	NM_010344	Mus musculus glutathione reductase (Gsr), mRNA [NM_010344]
CUST_5707_PI419772161	0.0494386	23.6714	down	Gspt2	NM_008179	Mus musculus G1 to S phase transition 2 (Gspt2), mRNA [NM_008179]
CUST_679_PI419772161	0.000622935	23.5895	down	Epdr1	NM_134065	Mus musculus ependymin related protein 1 (zebrafish) (Epdr1), mRNA [NM_134065]
CUST_6399_PI419772161	0.00243585	23.5827	down	Wls	NM_026582	Mus musculus wntless homolog (Drosophila) (Wls), mRNA [NM_026582]
CUST_20444_PI419772161	0.00360362	23.4991	down	Edn1	NM_010104	Mus musculus endothelin 1 (Edn1), mRNA [NM_010104]
CUST_9146_PI419772161	0.00322529	23.4722	down	Ppox	NM_008911	Mus musculus protoporphyrinogen oxidase (Ppox), nuclear gene encoding mitochondrial protein, mRNA [NM_008911]
CUST_17046_PI419772161	0.0015341	23.411	down	Col1a2	NM_007743	Mus musculus collagen, type I, alpha 2 (Col1a2), mRNA [NM_007743]
CUST_8537_PI419772161	0.00649334	23.2692	down	Ehd2	NM_153068	Mus musculus EH-domain containing 2 (Ehd2), mRNA [NM_153068]
CUST_15615_PI419772161	0.00557516	23.2546	down	Cma1	NM_010780	Mus musculus chymase 1, mast cell (Cma1), mRNA [NM_010780]
CUST_8592_PI419772161	0.0152423	23.1569	down	Snhg11	NM_175692	Mus musculus small nucleolar RNA host gene 11 (non-protein coding) (Snhg11), mRNA [NM_175692]
CUST_195_PI419772161	0.00894005	23.1184	down	2810046L04Rik	NM_173382	Mus musculus RIKEN cDNA 2810046L04 gene (2810046L04Rik), mRNA [NM_173382]
CUST_14043_PI419772161	0.000199412	23.1142	down	Matn4	NM_013592	Mus musculus matrilin 4 (Matn4), mRNA [NM_013592]
CUST_7985_PI419772161	0.000270374	23.0997	down	Serpinh1	NM_001111043	serine (or cysteine) proteinase inhibitor, clade
CUST_5233_PI419772161	0.0106585	23.0125	down	Upk3b	NM_175309	Mus musculus uroplakin 3B (Upk3b), mRNA [NM_175309]
CUST_20484_PI419772161	0.00392419	22.9748	down	Lamc1	NM_010683	laminin, gamma 1
CUST_385_PI419772161	0.00105272	22.9635	down	Ccdc22	NM_138603	Mus musculus coiled-coil domain containing 22 (Ccdc22), mRNA [NM_138603]
CUST_10463_PI419772161	0.00239186	22.9535	down	Sh3pxd2b	NM_177364	Mus musculus SH3 and PX domains 2B (Sh3pxd2b), mRNA [NM_177364]
CUST_4202_PI419772161	0.00277455	22.8687	down	Zfyve21	NM_026752	Mus musculus zinc finger, FYVE domain containing 21 (Zfyve21), mRNA [NM_026752]
CUST_16542_PI419772161	0.0235987	22.7841	down	Rps6ka3	NM_148945	Mus musculus ribosomal protein S6 kinase polypeptide 3 (Rps6ka3), mRNA [NM_148945]
CUST_4551_PI419772161	0.0234588	22.7085	down	Rpusd4	NM_028040	Mus musculus RNA pseudouridylate synthase domain containing 4 (Rpusd4), mRNA [NM_028040]
CUST_13253_PI419772161	0.0147302	22.6538	down	Gdi1	NM_010273	Mus musculus guanosine diphosphate (GDP) dissociation inhibitor 1 (Gdi1), mRNA [NM_010273]
CUST_15659_PI419772161	0.00622555	22.6528	down	Sall4	NM_201395	sal-like 4 isoform b
CUST_67_PI419772161	0.0136265	22.6297	down	6430598A04Rik	NM_175521	Mus musculus RIKEN cDNA 6430598A04 gene (6430598A04Rik), mRNA [NM_175521]
CUST_7564_PI419772161	0.00493943	22.5961	down	Anxa6	NM_001110211	annexin A6 isoform b
CUST_22362_PI419772161	0.0190101	22.5692	down	Fxyd3	NM_008557	Mus musculus FXYD domain-containing ion transport regulator 3 (Fxyd3), mRNA [NM_008557]
CUST_21593_PI419772161	0.00838036	22.5434	down	Cd70	NM_011617	Mus musculus CD70 antigen (Cd70), mRNA [NM_011617]
CUST_21396_PI419772161	0.00113625	22.5076	down	Igf2	NM_001122736	insulin-like growth factor 2 precursor
CUST_20462_PI419772161	0.0388148	22.5035	down	Dtna	NM_207650	Mus musculus dystrobrevin alpha (Dtna), transcript variant 1, mRNA [NM_207650]
CUST_18181_PI419772161	0.00938709	22.4483	down	Ndufs8	NM_144870	Mus musculus NADH dehydrogenase (ubiquinone) Fe-S protein 8 (Ndufs8), nuclear gene encoding mitochondrial protein, mRNA [NM_144870]
CUST_9115_PI419772161	0.00515075	22.4385	down	Hyi	NM_026601	Mus musculus hydroxypyruvate isomerase homolog (E. coli) (Hyi), mRNA [NM_026601]
CUST_14032_PI419772161	0.00646855	22.3712	down	Olfml2b	NM_177068	Mus musculus olfactomedin-like 2B (Olfml2b), mRNA [NM_177068]
CUST_15242_PI419772161	0.0143851	22.3635	down	Pofut1	NM_080463	protein O-fucosyltransferase 1 isoform 1
CUST_15303_PI419772161	0.0010357	22.3416	down	Islr	NM_012043	Mus musculus immunoglobulin superfamily containing leucine-rich repeat (Islr), mRNA [NM_012043]
CUST_7364_PI419772161	0.000482692	22.3355	down	Zfp467	NM_001085415	zinc finger protein 467 isoform a
CUST_15931_PI419772161	0.0103223	22.3294	down	Tubb5	NM_011655	Mus musculus tubulin, beta 5 (Tubb5), mRNA [NM_011655]
CUST_15536_PI419772161	0.000192592	22.2808	down	Dkk3	NM_015814	Mus musculus dickkopf homolog 3 (Xenopus laevis) (Dkk3), mRNA [NM_015814]
CUST_19823_PI419772161	0.000570087	22.2753	down	Epha2	NM_010139	Mus musculus Eph receptor A2 (Epha2), mRNA [NM_010139]
CUST_17208_PI419772161	0.00430382	22.1201	down	Anxa2	NM_007585	Mus musculus annexin A2 (Anxa2), mRNA [NM_007585]
CUST_14474_PI419772161	0.000233169	22.1186	down	Plxna3	NM_008883	Mus musculus plexin A3 (Plxna3), mRNA [NM_008883]
CUST_9424_PI419772161	0.0018872	22.118	down	Suv420h2	NM_001115018	suppressor of variegation 4-20 homolog 2
CUST_7910_PI419772161	6.13033e-05	22.1087	down	Rasl10a	NM_145216	Mus musculus RAS-like, family 10, member A (Rasl10a), mRNA [NM_145216]
CUST_21858_PI419772161	0.0339002	22.0758	down	Arsj	NM_173451	Mus musculus arylsulfatase J (Arsj), mRNA [NM_173451]
CUST_8264_PI419772161	0.000186596	21.9276	down	Pramef12	NM_029948	Mus musculus PRAME family member 12 (Pramef12), mRNA [NM_029948]
CUST_1012_PI419772161	0.000634059	21.9161	down	Wscd1	NM_177618	Mus musculus WSC domain containing 1 (Wscd1), mRNA [NM_177618]
CUST_10562_PI419772161	0.0202524	21.814	down	Fbln2	NM_007992	Mus musculus fibulin 2 (Fbln2), transcript variant 1, mRNA [NM_007992]
CUST_18513_PI419772161	0.000433493	21.713	down	Nedd9	NM_017464	Mus musculus neural precursor cell expressed, developmentally down-regulated gene 9 (Nedd9), transcript variant 2, mRNA [NM_017464]
CUST_7365_PI419772161	0.00157091	21.7098	down	Zfp467	NM_001085416	zinc finger protein 467 isoform b
CUST_2740_PI419772161	0.00272682	21.6314	down	Zfp658	NM_001008549	Mus musculus zinc finger protein 658 (Zfp658), mRNA [NM_001008549]
CUST_9551_PI419772161	0.00608471	21.6098	down	Bckdk	NM_009739	Mus musculus branched chain ketoacid dehydrogenase kinase (Bckdk), nuclear gene encoding mitochondrial protein, mRNA [NM_009739]
CUST_14793_PI419772161	0.000961884	21.6098	down	Kcnk3	NM_010608	Mus musculus potassium channel, subfamily K, member 3 (Kcnk3), mRNA [NM_010608]
CUST_19334_PI419772161	0.00412725	21.6041	down	Vcan	NM_001134474	versican isoform 3
CUST_1538_PI419772161	0.00405959	21.594	down	Pdlim7	NM_001114088	Mus musculus PDZ and LIM domain 7 (Pdlim7), transcript variant a, mRNA [NM_001114088]
CUST_16170_PI419772161	0.00283013	21.5498	down	Rab35	NM_198163	Mus musculus RAB35, member RAS oncogene family (Rab35), mRNA [NM_198163]
CUST_6_PI419532418	0.00579084	21.5294	down	Hsp90ab1	NM_008302	heat shock protein 1, beta
CUST_18047_PI419772161	0.000590875	21.5013	down	Fbn1	NM_007993	Mus musculus fibrillin 1 (Fbn1), mRNA [NM_007993]
CUST_9397_PI419772161	0.00141185	21.4425	down	BC005764	NM_181681	Mus musculus cDNA sequence BC005764 (BC005764), transcript variant 1, mRNA [NM_181681]
CUST_18858_PI419772161	0.000824701	21.3962	down	Gm44	NM_001101450	hypothetical protein LOC212952
CUST_13842_PI419772161	0.000990538	21.3669	down	Map3k8	NM_007746	mitogen-activated protein kinase kinase kinase
CUST_17409_PI419772161	0.0156057	21.3545	down	Pigq	NM_011822	Mus musculus phosphatidylinositol glycan anchor biosynthesis, class Q (Pigq), mRNA [NM_011822]
CUST_8138_PI419772161	1.62137e-05	21.3502	down	Fam115c	NM_146174	Mus musculus family with sequence similarity 115, member C (Fam115c), mRNA [NM_146174]
CUST_1288_PI419772161	6.2188e-05	21.337	down	1200009O22Rik	NM_025817	Mus musculus RIKEN cDNA 1200009O22 gene (1200009O22Rik), mRNA [NM_025817]
CUST_14525_PI419772161	0.0111773	21.31	down	Gse1	NM_001145896	genetic suppressor element 1 isoform 2
CUST_15720_PI419772161	0.0053074	21.2672	down	Map4k2	NM_009006	Mus musculus mitogen-activated protein kinase kinase kinase kinase 2 (Map4k2), mRNA [NM_009006]
CUST_12647_PI419772161	0.0129245	21.2393	down	Dctpp1	NM_023203	Mus musculus dCTP pyrophosphatase 1 (Dctpp1), mRNA [NM_023203]
CUST_20880_PI419772161	0.0025653	21.1959	down	Smad7	NM_001042660	Mus musculus MAD homolog 7 (Drosophila) (Smad7), mRNA [NM_001042660]
CUST_13864_PI419772161	0.000317593	21.1937	down	Kcp	NM_001029985	Mus musculus kielin/chordin-like protein (Kcp), mRNA [NM_001029985]
CUST_13265_PI419772161	0.0168932	21.1825	down	Tgif2	NM_173396	Mus musculus TGFB-induced factor homeobox 2 (Tgif2), mRNA [NM_173396]
CUST_20653_PI419772161	0.000567011	21.1787	down	En1	NM_010133	Mus musculus engrailed 1 (En1), mRNA [NM_010133]
CUST_9750_PI419772161	0.000307876	21.1619	down	Fam19a5	NM_134096	Mus musculus family with sequence similarity 19, member A5 (Fam19a5), mRNA [NM_134096]
CUST_21499_PI419772161	0.00299596	21.1241	down	Egr2	NM_010118	Mus musculus early growth response 2 (Egr2), mRNA [NM_010118]
CUST_8980_PI419772161	0.00688748	21.1211	down	Renbp	NM_023132	Mus musculus renin binding protein (Renbp), transcript variant 1, mRNA [NM_023132]
CUST_20364_PI419772161	0.00769493	21.0881	down	Enah	NM_001083121	enabled homolog isoform 4
CUST_21989_PI419772161	0.0216685	20.9601	down	Gper	NM_029771	Mus musculus G protein-coupled estrogen receptor 1 (Gper), mRNA [NM_029771]
CUST_20798_PI419772161	0.000978965	20.9405	down	Ntrk1	NM_001033124	Mus musculus neurotrophic tyrosine kinase, receptor, type 1 (Ntrk1), mRNA [NM_001033124]
CUST_13391_PI419772161	0.000440221	20.9241	down	Cox8b	NM_007751	Mus musculus cytochrome c oxidase, subunit VIIIb (Cox8b), nuclear gene encoding mitochondrial protein, mRNA [NM_007751]
CUST_2857_PI419772161	0.00833219	20.9204	down	Zfp462	NM_172867	Mus musculus zinc finger protein 462 (Zfp462), mRNA [NM_172867]
CUST_8561_PI419772161	0.000140754	20.8742	down	Trib2	NM_144551	Mus musculus tribbles homolog 2 (Drosophila) (Trib2), mRNA [NM_144551]
CUST_8888_PI419772161	0.00589166	20.8642	down	Fam134c	NM_026501	Mus musculus family with sequence similarity 134, member C (Fam134c), transcript variant 1, mRNA [NM_026501]
CUST_20896_PI419772161	0.00142508	20.8583	down	Krt19	NM_008471	Mus musculus keratin 19 (Krt19), mRNA [NM_008471]
CUST_16503_PI419772161	0.00550937	20.854	down	Il27ra	NM_016671	Mus musculus interleukin 27 receptor, alpha (Il27ra), mRNA [NM_016671]
CUST_21316_PI419772161	0.00116614	20.8323	down	Neb	NM_010889	Mus musculus nebulin (Neb), mRNA [NM_010889]
CUST_17587_PI419772161	0.00787414	20.8255	down	Psap	NM_001146122	prosaposin isoform D preproprotein
CUST_8416_PI419772161	0.00947843	20.8105	down	1110034G24Rik	NM_028637	Mus musculus RIKEN cDNA 1110034G24 gene (1110034G24Rik), mRNA [NM_028637]
CUST_31_PI419772161	0.0168062	20.7821	down	Xlr5c	NM_031493	Mus musculus X-linked lymphocyte-regulated 5C (Xlr5c), mRNA [NM_031493]
CUST_6146_PI419772161	5.46267e-05	20.7812	down	Asphd2	NM_028386	Mus musculus aspartate beta-hydroxylase domain containing 2 (Asphd2), mRNA [NM_028386]
CUST_15663_PI419772161	0.00264418	20.7776	down	Sall4	NM_201396	sal-like 4 isoform c
CUST_18036_PI419772161	0.00018746	20.7509	down	Ccnd2	NM_009829	Mus musculus cyclin D2 (Ccnd2), mRNA [NM_009829]
CUST_7763_PI419772161	0.00194248	20.7261	down	Hs6st2	NM_015819	heparan sulfate 6-O-sulfotransferase 2 isoform
CUST_4901_PI419772161	0.00608246	20.7156	down	Nudt19	NM_033080	Mus musculus nudix (nucleoside diphosphate linked moiety X)-type motif 19 (Nudt19), nuclear gene encoding mitochondrial protein, mRNA [NM_033080]
CUST_7984_PI419772161	0.00121633	20.6801	down	Serpinh1	NM_009825	Mus musculus serine (or cysteine) peptidase inhibitor, clade H, member 1 (Serpinh1), transcript variant 1, mRNA [NM_009825]
CUST_5375_PI419772161	0.0119105	20.5844	down	Ap2a2	NM_007459	Mus musculus adaptor protein complex AP-2, alpha 2 subunit (Ap2a2), mRNA [NM_007459]
CUST_15095_PI419772161	0.00786371	20.5702	down	Pgk1	NM_008828	Mus musculus phosphoglycerate kinase 1 (Pgk1), mRNA [NM_008828]
CUST_21338_PI419772161	0.000329664	20.5671	down	Smo	NM_176996	Mus musculus smoothened homolog (Drosophila) (Smo), mRNA [NM_176996]
CUST_5744_PI419772161	0.00238142	20.4772	down	Ptgfrn	NM_011197	Mus musculus prostaglandin F2 receptor negative regulator (Ptgfrn), mRNA [NM_011197]
CUST_8970_PI419772161	0.000829	20.4771	down	Ctse	NM_007799	cathepsin E preproprotein
CUST_578_PI419772161	0.00324316	20.4608	down	Mpnd	NM_026530	Mus musculus MPN domain containing (Mpnd), mRNA [NM_026530]
CUST_4017_PI419772161	0.000722898	20.4446	down	Adamts10	NM_172619	Mus musculus a disintegrin-like and metallopeptidase (reprolysin type) with thrombospondin type 1 motif, 10 (Adamts10), mRNA [NM_172619]
CUST_11026_PI419772161	0.00109289	20.4393	down	Ppp1ca	NM_031868	Mus musculus protein phosphatase 1, catalytic subunit, alpha isoform (Ppp1ca), mRNA [NM_031868]
CUST_13568_PI419772161	0.0181168	20.4053	down	Dsc2	NM_013505	Mus musculus desmocollin 2 (Dsc2), mRNA [NM_013505]
CUST_6961_PI419772161	0.00200943	20.3663	down	Nanos2	NM_194064	Mus musculus nanos homolog 2 (Drosophila) (Nanos2), mRNA [NM_194064]
CUST_15712_PI419772161	0.000185979	20.365	down	Nkx3-1	NM_010921	Mus musculus NK-3 transcription factor, locus 1 (Drosophila) (Nkx3-1), mRNA [NM_010921]
CUST_18450_PI419772161	0.00157365	20.3546	down	Col1a1	NM_007742	Mus musculus collagen, type I, alpha 1 (Col1a1), mRNA [NM_007742]
CUST_7722_PI419772161	4.75802e-05	20.3011	down	Cd248	NM_054042	Mus musculus CD248 antigen, endosialin (Cd248), mRNA [NM_054042]
CUST_20949_PI419772161	0.00378595	20.2649	down	Snca	NM_001042451	Mus musculus synuclein, alpha (Snca), transcript variant 1, mRNA [NM_001042451]
CUST_10047_PI419772161	0.0119366	20.2134	down	Mmgt2	NM_175002	Mus musculus membrane magnesium transporter 2 (Mmgt2), mRNA [NM_175002]
CUST_11728_PI419772161	0.000270253	20.2108	down	Plekhh3	NM_146030	Mus musculus pleckstrin homology domain containing, family H (with MyTH4 domain) member 3 (Plekhh3), mRNA [NM_146030]
CUST_5218_PI419772161	0.00012938	20.1854	down	Cdh15	NM_007662	Mus musculus cadherin 15 (Cdh15), mRNA [NM_007662]
CUST_2735_PI419772161	0.00142596	20.1841	down	Pcdhb21	NM_053146	Mus musculus protocadherin beta 21 (Pcdhb21), mRNA [NM_053146]
CUST_12874_PI419772161	0.0107497	20.1739	down	Prelid1	NM_025596	Mus musculus PRELI domain containing 1 (Prelid1), mRNA [NM_025596]
CUST_16455_PI419772161	0.0020852	20.1644	down	Bat2l	NM_172661	Mus musculus HLA-B associated transcript 2-like (Bat2l), transcript variant 2, mRNA [NM_172661]
CUST_19449_PI419772161	0.000315306	20.1451	down	Stc1	NM_009285	Mus musculus stanniocalcin 1 (Stc1), mRNA [NM_009285]
CUST_20608_PI419772161	0.00413485	20.1356	down	Casq2	NM_009814	Mus musculus calsequestrin 2 (Casq2), nuclear gene encoding mitochondrial protein, mRNA [NM_009814]
CUST_22314_PI419772161	0.0246946	20.0984	down	Chst8	NM_175140	Mus musculus carbohydrate (N-acetylgalactosamine 4-0) sulfotransferase 8 (Chst8), mRNA [NM_175140]
CUST_7068_PI419772161	0.00635228	20.0648	down	Dtx1	NM_008052	Mus musculus deltex 1 homolog (Drosophila) (Dtx1), mRNA [NM_008052]
CUST_20590_PI419772161	0.000311304	20.0387	down	Lgr5	NM_010195	Mus musculus leucine rich repeat containing G protein coupled receptor 5 (Lgr5), mRNA [NM_010195]
CUST_10127_PI419772161	0.0149205	19.9728	down	Fam18a	NM_001013778	hypothetical protein LOC383103
CUST_3060_PI419772161	0.00913873	19.8996	down	Etfb	NM_026695	Mus musculus electron transferring flavoprotein, beta polypeptide (Etfb), mRNA [NM_026695]
CUST_11108_PI419772161	0.00141407	19.8673	down	Capn5	NM_007602	Mus musculus calpain 5 (Capn5), mRNA [NM_007602]
CUST_19692_PI419772161	0.000670642	19.8498	down	Lbh	NM_029999	Mus musculus limb-bud and heart (Lbh), mRNA [NM_029999]
CUST_17344_PI419772161	0.00359926	19.7799	down	Fign	NM_021716	Mus musculus fidgetin (Fign), mRNA [NM_021716]
CUST_10048_PI419772161	0.0104176	19.7774	down	Tmem114	NM_029070	Mus musculus transmembrane protein 114 (Tmem114), mRNA [NM_029070]
CUST_19770_PI419772161	0.000132911	19.7336	down	Stat5b	NM_001113563	signal transducer and activator of transcription
CUST_20166_PI419772161	0.00108076	19.7292	down	Thbd	NM_009378	Mus musculus thrombomodulin (Thbd), mRNA [NM_009378]
CUST_1466_PI419772161	0.0132921	19.7118	down	A830007P12Rik	NM_146115	Mus musculus RIKEN cDNA A830007P12 gene (A830007P12Rik), mRNA [NM_146115]
CUST_3495_PI419772161	0.0134438	19.7051	down	Gtf2h3	NM_181410	Mus musculus general transcription factor IIH, polypeptide 3 (Gtf2h3), mRNA [NM_181410]
CUST_10514_PI419772161	0.00865379	19.6615	down	Cthrc1	NM_026778	Mus musculus collagen triple helix repeat containing 1 (Cthrc1), mRNA [NM_026778]
CUST_21292_PI419772161	0.00416579	19.6515	down	F2rl1	NM_007974	Mus musculus coagulation factor II (thrombin) receptor-like 1 (F2rl1), mRNA [NM_007974]
CUST_4249_PI419772161	0.000410892	19.6229	down	Mical1	NM_138315	Mus musculus microtubule associated monoxygenase, calponin and LIM domain containing 1 (Mical1), transcript variant 1, mRNA [NM_138315]
CUST_18005_PI419772161	0.0214949	19.5445	down	Scn3b	NM_178227	Mus musculus sodium channel, voltage-gated, type III, beta (Scn3b), transcript variant 2, mRNA [NM_178227]
CUST_18637_PI419772161	0.00387006	19.5427	down	Neurog3	NM_009719	Mus musculus neurogenin 3 (Neurog3), mRNA [NM_009719]
CUST_8597_PI419772161	0.000100568	19.5172	down	Hic1	NM_010430	Mus musculus hypermethylated in cancer 1 (Hic1), transcript variant 1, mRNA [NM_010430]
CUST_10082_PI419772161	0.000229355	19.5099	down	Rhox7	NM_001025086	reproductive homeobox 7
CUST_19465_PI419772161	0.000834163	19.4931	down	Vcan	NM_001081249	Mus musculus versican (Vcan), transcript variant 1, mRNA [NM_001081249]
CUST_14059_PI419772161	0.00975155	19.4864	down	Prom2	NM_178047	Mus musculus prominin 2 (Prom2), transcript variant 2, mRNA [NM_178047]
CUST_11686_PI419772161	0.000171613	19.4622	down	Neurl1B	NM_001081656	Mus musculus neuralized homolog 1B (Drosophila) (Neurl1B), mRNA [NM_001081656]
CUST_18064_PI419772161	0.012177	19.4567	down	Ctdsp1	NM_153088	Mus musculus CTD (carboxy-terminal domain, RNA polymerase II, polypeptide A) small phosphatase 1 (Ctdsp1), mRNA [NM_153088]
CUST_15305_PI419772161	0.00825441	19.443	down	Nobox	NM_130869	Mus musculus NOBOX oogenesis homeobox (Nobox), mRNA [NM_130869]
CUST_6355_PI419772161	0.00564435	19.4073	down	Mfsd4	NM_001114662	Mus musculus major facilitator superfamily domain containing 4 (Mfsd4), transcript variant b, mRNA [NM_001114662]
CUST_15175_PI419772161	0.000200813	19.3954	down	Lmnb1	NM_010721	Mus musculus lamin B1 (Lmnb1), mRNA [NM_010721]
CUST_19337_PI419772161	0.00273722	19.3783	down	Vcan	NM_001134475	versican isoform 4
CUST_18769_PI419772161	0.00126024	19.3727	down	Frmd4a	NM_172475	Mus musculus FERM domain containing 4A (Frmd4a), transcript variant 1, mRNA [NM_172475]
CUST_1583_PI419772161	0.012485	19.3214	down	Rbbp9	NM_015754	Mus musculus retinoblastoma binding protein 9 (Rbbp9), mRNA [NM_015754]
CUST_6734_PI419772161	0.0105371	19.3143	down	Rhou	NM_133955	Mus musculus ras homolog gene family, member U (Rhou), mRNA [NM_133955]
CUST_13434_PI419772161	0.00381799	19.3051	down	Hspa8	NM_031165	Mus musculus heat shock protein 8 (Hspa8), mRNA [NM_031165]
CUST_14028_PI419772161	0.00299282	19.3034	down	Nav1	NM_173437	Mus musculus neuron navigator 1 (Nav1), mRNA [NM_173437]
CUST_18473_PI419772161	0.00297153	19.2726	down	Mad2l1	NM_019499	Mus musculus MAD2 mitotic arrest deficient-like 1 (yeast) (Mad2l1), mRNA [NM_019499]
CUST_10024_PI419772161	0.0167306	19.2701	down	Myo9b	NM_001142322	myosin IXb isoform 1
CUST_11408_PI419772161	0.0471568	19.2603	down	Psmg3	NM_025604	Mus musculus proteasome (prosome, macropain) assembly chaperone 3 (Psmg3), mRNA [NM_025604]
CUST_8982_PI419772161	0.00483541	19.2535	down	Bmp1	NM_009755	Mus musculus bone morphogenetic protein 1 (Bmp1), transcript variant 1, mRNA [NM_009755]
CUST_14469_PI419772161	0.0141994	19.2419	down	Klf16	NM_078477	Mus musculus Kruppel-like factor 16 (Klf16), mRNA [NM_078477]
CUST_20247_PI419772161	0.0166135	19.2356	down	Bax	NM_007527	Mus musculus BCL2-associated X protein (Bax), mRNA [NM_007527]
CUST_18338_PI419772161	0.00330266	19.2185	down	Kctd14	NM_001010826	potassium channel tetramerisation domain
CUST_18670_PI419772161	8.45058e-05	19.196	down	Foxc2	NM_013519	Mus musculus forkhead box C2 (Foxc2), mRNA [NM_013519]
CUST_6466_PI419772161	0.0266121	19.1868	down	A430107O13Rik	NM_001081351	Mus musculus RIKEN cDNA A430107O13 gene (A430107O13Rik), mRNA [NM_001081351]
CUST_12043_PI419772161	0.00032008	19.1529	down	Mrc2	NM_008626	Mus musculus mannose receptor, C type 2 (Mrc2), mRNA [NM_008626]
CUST_3768_PI419772161	0.000552168	19.152	down	6430527G18Rik	NM_145836	Mus musculus RIKEN cDNA 6430527G18 gene (6430527G18Rik), mRNA [NM_145836]
CUST_11844_PI419772161	0.0136214	19.0735	down	Csrp1	NM_007791	Mus musculus cysteine and glycine-rich protein 1 (Csrp1), mRNA [NM_007791]
CUST_8031_PI419772161	0.00877377	19.0331	down	Mpp3	NM_007863	Mus musculus membrane protein, palmitoylated 3 (MAGUK p55 subfamily member 3) (Mpp3), mRNA [NM_007863]
CUST_20291_PI419772161	0.000679348	19.0159	down	Adam12	NM_007400	Mus musculus a disintegrin and metallopeptidase domain 12 (meltrin alpha) (Adam12), mRNA [NM_007400]
CUST_18896_PI419772161	0.00268282	18.9758	down	Cdc25b	NM_023117	Mus musculus cell division cycle 25 homolog B (S. pombe) (Cdc25b), transcript variant 1, mRNA [NM_023117]
CUST_21519_PI419772161	0.028287	18.9402	down	Rapgef2	NM_001099624	Mus musculus Rap guanine nucleotide exchange factor (GEF) 2 (Rapgef2), mRNA [NM_001099624]
CUST_11282_PI419772161	0.00499349	18.9366	down	Ap1s3	NM_183027	Mus musculus adaptor-related protein complex AP-1, sigma 3 (Ap1s3), mRNA [NM_183027]
CUST_10197_PI419772161	0.0414254	18.9278	down	Arhgef1	NM_001130150	Rho guanine nucleotide exchange factor (GEF) 1
CUST_1143_PI419772161	0.000482486	18.8802	down	Tmem158	NM_001002267	Mus musculus transmembrane protein 158 (Tmem158), mRNA [NM_001002267]
CUST_11100_PI419772161	0.0452779	18.8349	down	Mmp23	NM_011985	Mus musculus matrix metallopeptidase 23 (Mmp23), mRNA [NM_011985]
CUST_6330_PI419772161	0.0342146	18.7962	down	Stox2	NM_001114311	storkhead box 2 isoform 1
CUST_19617_PI419772161	0.00100186	18.7879	down	Trib3	NM_175093	Mus musculus tribbles homolog 3 (Drosophila) (Trib3), mRNA [NM_175093]
CUST_19448_PI419772161	0.00215532	18.7835	down	Vps26b	NM_178027	Mus musculus vacuolar protein sorting 26 homolog B (yeast) (Vps26b), mRNA [NM_178027]
CUST_20835_PI419772161	0.0046451	18.7765	down	Fn1	NM_010233	Mus musculus fibronectin 1 (Fn1), mRNA [NM_010233]
CUST_21171_PI419772161	0.000789489	18.7543	down	Thra	NM_178060	Mus musculus thyroid hormone receptor alpha (Thra), mRNA [NM_178060]
CUST_9905_PI419772161	0.0101273	18.7485	down	Krt27	NM_010666	Mus musculus keratin 27 (Krt27), mRNA [NM_010666]
CUST_15294_PI419772161	0.00132309	18.7226	down	Sema6b	NM_013662	Mus musculus sema domain, transmembrane domain (TM), and cytoplasmic domain, (semaphorin) 6B (Sema6b), transcript variant 1, mRNA [NM_013662]
CUST_7764_PI419772161	0.00141803	18.7105	down	Hs6st2	NM_001077202	Mus musculus heparan sulfate 6-O-sulfotransferase 2 (Hs6st2), transcript variant 1, mRNA [NM_001077202]
CUST_18364_PI419772161	0.000197025	18.706	down	Mycl1	NM_008506	Mus musculus v-myc myelocytomatosis viral oncogene homolog 1, lung carcinoma derived (avian) (Mycl1), mRNA [NM_008506]
CUST_3875_PI419772161	0.0354823	18.7017	down	Mal2	NM_178920	Mus musculus mal, T-cell differentiation protein 2 (Mal2), mRNA [NM_178920]
CUST_12098_PI419772161	0.0117491	18.6143	down	Nsfl1c	NM_198326	Mus musculus NSFL1 (p97) cofactor (p47) (Nsfl1c), mRNA [NM_198326]
CUST_1952_PI419772161	0.00585536	18.526	down	Ppp2r2c	NM_172994	Mus musculus protein phosphatase 2 (formerly 2A), regulatory subunit B (PR 52), gamma isoform (Ppp2r2c), mRNA [NM_172994]
CUST_9232_PI419772161	0.00249989	18.52	down	Mgat3	NM_010795	Mus musculus mannoside acetylglucosaminyltransferase 3 (Mgat3), mRNA [NM_010795]
CUST_19608_PI419772161	0.000427826	18.49	down	Dnmt3a	NM_153743	Mus musculus DNA methyltransferase 3A (Dnmt3a), transcript variant 2, mRNA [NM_153743]
CUST_12224_PI419772161	0.00231179	18.4585	down	Lcor	NM_172154	Mus musculus ligand dependent nuclear receptor corepressor (Lcor), mRNA [NM_172154]
CUST_22434_PI419772161	0.000423889	18.4348	down	Tcl1	NM_009337	Mus musculus T-cell lymphoma breakpoint 1 (Tcl1), mRNA [NM_009337]
CUST_21400_PI419772161	0.000267076	18.4231	down	Igf2	NM_001122737	insulin-like growth factor 2 precursor
CUST_15819_PI419772161	0.00365875	18.4224	down	Upp1	NM_001159401	uridine phosphorylase 1
CUST_13332_PI419772161	0.0038334	18.4129	down	Vwa5b2	NM_001144953	Mus musculus von Willebrand factor A domain containing 5B2 (Vwa5b2), transcript variant 1, mRNA [NM_001144953]
CUST_11341_PI419772161	0.0425525	18.3984	down	Ndufv3	NM_030087	Mus musculus NADH dehydrogenase (ubiquinone) flavoprotein 3 (Ndufv3), nuclear gene encoding mitochondrial protein, transcript variant 1, mRNA [NM_030087]
CUST_18459_PI419772161	0.000445532	18.3601	down	Tcf21	NM_011545	Mus musculus transcription factor 21 (Tcf21), mRNA [NM_011545]
CUST_4463_PI419772161	0.0108964	18.3579	down	Myadm	NM_016969	Mus musculus myeloid-associated differentiation marker (Myadm), transcript variant 4, mRNA [NM_016969]
CUST_16477_PI419772161	0.0164677	18.3489	down	Tnmd	NM_022322	Mus musculus tenomodulin (Tnmd), mRNA [NM_022322]
CUST_20432_PI419772161	0.0418826	18.3267	down	Cttn	NM_007803	Mus musculus cortactin (Cttn), mRNA [NM_007803]
CUST_21268_PI419772161	0.000509492	18.3079	down	Socs2	NM_007706	Mus musculus suppressor of cytokine signaling 2 (Socs2), transcript variant 1, mRNA [NM_007706]
CUST_17421_PI419772161	0.00161009	18.2835	down	Lox	NM_010728	lysyl oxidase
CUST_4238_PI419772161	0.00308448	18.281	down	0610031J06Rik	NM_020003	Mus musculus RIKEN cDNA 0610031J06 gene (0610031J06Rik), mRNA [NM_020003]
CUST_11789_PI419772161	0.00889798	18.2625	down	Eif2s3x	NM_012010	Mus musculus eukaryotic translation initiation factor 2, subunit 3, structural gene X-linked (Eif2s3x), mRNA [NM_012010]
CUST_6985_PI419772161	0.00195068	18.2459	down	Pmepa1	NM_022995	Mus musculus prostate transmembrane protein, androgen induced 1 (Pmepa1), mRNA [NM_022995]
CUST_17083_PI419772161	0.0075809	18.2368	down	Gbx2	NM_010262	Mus musculus gastrulation brain homeobox 2 (Gbx2), mRNA [NM_010262]
CUST_20834_PI419772161	0.00443135	18.2317	down	Nedd4	NM_010890	Mus musculus neural precursor cell expressed, developmentally down-regulated 4 (Nedd4), mRNA [NM_010890]
CUST_4298_PI419772161	0.0137605	18.223	down	Kctd12b	NM_175429	Mus musculus potassium channel tetramerisation domain containing 12b (Kctd12b), mRNA [NM_175429]
CUST_7347_PI419772161	0.0115011	18.2031	down	Vps13d	NM_001128198	vacuolar protein sorting 13 D
CUST_21326_PI419772161	0.00832835	18.1615	down	Sparc	NM_009242	Mus musculus secreted acidic cysteine rich glycoprotein (Sparc), mRNA [NM_009242]
CUST_22248_PI419772161	0.00331269	18.142	down	Rpl7	NM_011291	Mus musculus ribosomal protein L7 (Rpl7), mRNA [NM_011291]
CUST_13071_PI419772161	0.0105611	18.1412	down	Nppc	NM_010933	Mus musculus natriuretic peptide precursor type C (Nppc), mRNA [NM_010933]
CUST_4438_PI419772161	0.0211079	18.1234	down	Zfp553	NM_146201	Mus musculus zinc finger protein 553 (Zfp553), mRNA [NM_146201]
CUST_13418_PI419772161	0.00549636	18.0695	down	Hoxb8	NM_010461	Mus musculus homeobox B8 (Hoxb8), mRNA [NM_010461]
CUST_19655_PI419772161	0.00238611	18.0685	down	Vcan	NM_019389	versican isoform 2
CUST_13892_PI419772161	0.000487897	18.0604	down	Fmod	NM_021355	Mus musculus fibromodulin (Fmod), mRNA [NM_021355]
CUST_14404_PI419772161	0.00805473	18.0475	down	Thap3	NM_001145929	THAP domain containing, apoptosis associated
CUST_807_PI419772161	0.0141456	18.0443	down	9430023L20Rik	NM_026566	Mus musculus RIKEN cDNA 9430023L20 gene (9430023L20Rik), mRNA [NM_026566]
CUST_4243_PI419772161	0.0130882	18.0431	down	Uxt	NM_013840	Mus musculus ubiquitously expressed transcript (Uxt), mRNA [NM_013840]
CUST_9317_PI419772161	0.00357236	18.0255	down	Dapk2	NM_010019	Mus musculus death-associated protein kinase 2 (Dapk2), mRNA [NM_010019]
CUST_15596_PI419772161	0.0212987	18.015	down	Got2	NM_010325	Mus musculus glutamate oxaloacetate transaminase 2, mitochondrial (Got2), nuclear gene encoding mitochondrial protein, mRNA [NM_010325]
CUST_19768_PI419772161	0.000286211	18.0021	down	Stat5b	NM_011489	Mus musculus signal transducer and activator of transcription 5B (Stat5b), transcript variant 1, mRNA [NM_011489]
CUST_16456_PI419772161	0.0017089	17.9962	down	Bat2l	NM_001159634	HLA-B associated transcript 2-like isoform 1
CUST_13161_PI419772161	0.00241159	17.9946	down	Serbp1	NM_001113566	SERPINE1 mRNA binding protein 1 isoform 4
CUST_17320_PI419772161	0.000337701	17.9922	down	Itga4	NM_010576	Mus musculus integrin alpha 4 (Itga4), mRNA [NM_010576]
CUST_12352_PI419772161	0.008	17.9677	down	Timm50	NM_025616	Mus musculus translocase of inner mitochondrial membrane 50 homolog (yeast) (Timm50), nuclear gene encoding mitochondrial protein, mRNA [NM_025616]
CUST_14624_PI419772161	0.0427802	17.9461	down	H6pd	NM_173371	Mus musculus hexose-6-phosphate dehydrogenase (glucose 1-dehydrogenase) (H6pd), mRNA [NM_173371]
CUST_17616_PI419772161	0.00346251	17.9412	down	Nuak1	NM_001004363	Mus musculus NUAK family, SNF1-like kinase, 1 (Nuak1), mRNA [NM_001004363]
CUST_17544_PI419772161	0.000248449	17.932	down	Dppa3	NM_139218	Mus musculus developmental pluripotency-associated 3 (Dppa3), mRNA [NM_139218]
CUST_20934_PI419772161	0.00422289	17.9085	down	Ren1	NM_031192	Mus musculus renin 1 structural (Ren1), mRNA [NM_031192]
CUST_223_PI419772161	0.00480943	17.8696	down	Lypd6	NM_177139	Mus musculus LY6/PLAUR domain containing 6 (Lypd6), transcript variant 1, mRNA [NM_177139]
CUST_16397_PI419772161	0.0264912	17.8581	down	Sema6d	NM_199238	sema domain, transmembrane domain (TM), and
CUST_21685_PI419772161	0.00121831	17.8443	down	Gucy1b3	NM_017469	Mus musculus guanylate cyclase 1, soluble, beta 3 (Gucy1b3), transcript variant 1, mRNA [NM_017469]
CUST_2417_PI419772161	0.0125154	17.8076	down	Ppp1r15a	NM_008654	Mus musculus protein phosphatase 1, regulatory (inhibitor) subunit 15A (Ppp1r15a), mRNA [NM_008654]
CUST_10893_PI419772161	0.00470009	17.7944	down	Ppil1	NM_026845	Mus musculus peptidylprolyl isomerase (cyclophilin)-like 1 (Ppil1), mRNA [NM_026845]
CUST_3473_PI419772161	0.0456737	17.7563	down	Zfp1	NM_011742	zinc finger protein 1 isoform 2
CUST_4435_PI419772161	0.0447872	17.7453	down	Aard	NM_175503	Mus musculus alanine and arginine rich domain containing protein (Aard), mRNA [NM_175503]
CUST_21666_PI419772161	0.0029582	17.7192	down	Nrip2	NM_021717	Mus musculus nuclear receptor interacting protein 2 (Nrip2), transcript variant 2, mRNA [NM_021717]
CUST_7733_PI419772161	0.00429185	17.7035	down	Ppp1r8	NM_146154	Mus musculus protein phosphatase 1, regulatory (inhibitor) subunit 8 (Ppp1r8), mRNA [NM_146154]
CUST_21393_PI419772161	0.000270803	17.6717	down	Igf2	NM_010514	Mus musculus insulin-like growth factor 2 (Igf2), transcript variant 1, mRNA [NM_010514]
CUST_4508_PI419772161	0.00709178	17.6536	down	Myh8	NM_177369	Mus musculus myosin, heavy polypeptide 8, skeletal muscle, perinatal (Myh8), mRNA [NM_177369]
CUST_16068_PI419772161	0.00298209	17.6408	down	Ghr	NM_010284	Mus musculus growth hormone receptor (Ghr), transcript variant 1, mRNA [NM_010284]
CUST_1378_PI419772161	0.000202161	17.6343	down	Gpc6	NM_011821	glypican 6 isoform 2
CUST_3813_PI419772161	0.0147833	17.6128	down	Cenpb	NM_007682	Mus musculus centromere protein B (Cenpb), mRNA [NM_007682]
CUST_6333_PI419772161	0.0249294	17.5845	down	Ajap1	NM_001099299	Mus musculus adherens junction associated protein 1 (Ajap1), mRNA [NM_001099299]
CUST_11552_PI419772161	0.00124002	17.5837	down	Col18a1	NM_001109991	procollagen, type XVIII, alpha 1 isoform 1
CUST_17586_PI419772161	0.0103134	17.5652	down	Psap	NM_001146121	prosaposin isoform C preproprotein
CUST_5446_PI419772161	0.00322214	17.5534	down	Raet1c	NM_009018	retinoic acid early transcript gamma
CUST_8418_PI419772161	0.00253477	17.5513	down	Lcmt2	NM_177846	Mus musculus leucine carboxyl methyltransferase 2 (Lcmt2), mRNA [NM_177846]
CUST_2413_PI419772161	0.0211686	17.4932	down	Crispld1	NM_031402	Mus musculus cysteine-rich secretory protein LCCL domain containing 1 (Crispld1), mRNA [NM_031402]
CUST_17594_PI419772161	0.00838352	17.481	down	Psap	NM_001146124	prosaposin isoform F preproprotein
CUST_21466_PI419772161	0.000788787	17.481	down	Lpl	NM_008509	Mus musculus lipoprotein lipase (Lpl), mRNA [NM_008509]
CUST_18503_PI419772161	0.0033708	17.4336	down	Mycn	NM_008709	Mus musculus v-myc myelocytomatosis viral related oncogene, neuroblastoma derived (avian) (Mycn), mRNA [NM_008709]
CUST_6551_PI419772161	0.000771991	17.4331	down	Arhgap17	NM_001122642	nadrin isoform d
CUST_16600_PI419772161	0.000481628	17.4182	down	Nr4a2	NM_001139509	nuclear receptor subfamily 4, group A, member 2
CUST_13512_PI419772161	0.00365027	17.4123	down	Nr2f1	NM_010151	Mus musculus nuclear receptor subfamily 2, group F, member 1 (Nr2f1), mRNA [NM_010151]
CUST_8356_PI419772161	0.00534795	17.4008	down	Dgcr14	NM_001081633	Mus musculus DiGeorge syndrome critical region gene 14 (Dgcr14), transcript variant 2, mRNA [NM_001081633]
CUST_7630_PI419772161	0.0011186	17.393	down	Dner	NM_152915	Mus musculus delta/notch-like EGF-related receptor (Dner), mRNA [NM_152915]
CUST_19777_PI419772161	0.000623803	17.3921	down	Wwtr1	NM_133784	Mus musculus WW domain containing transcription regulator 1 (Wwtr1), transcript variant 2, mRNA [NM_133784]	Hippo signaling pathway
CUST_14902_PI419772161	0.0010887	17.3873	down	Pi15	NM_053191	Mus musculus peptidase inhibitor 15 (Pi15), mRNA [NM_053191]
CUST_9519_PI419772161	0.00633114	17.3722	down	Dusp12	NM_023173	Mus musculus dual specificity phosphatase 12 (Dusp12), mRNA [NM_023173]
CUST_17355_PI419772161	0.00950621	17.3458	down	Gipc1	NM_018771	Mus musculus GIPC PDZ domain containing family, member 1 (Gipc1), mRNA [NM_018771]
CUST_14523_PI419772161	0.00579622	17.3339	down	Gse1	NM_198671	Mus musculus genetic suppressor element 1 (Gse1), transcript variant 1, mRNA [NM_198671]
CUST_19537_PI419772161	0.00463739	17.3211	down	Cd9	NM_007657	Mus musculus CD9 antigen (Cd9), mRNA [NM_007657]
CUST_7615_PI419772161	0.00381787	17.2769	down	Bnc1	NM_007562	Mus musculus basonuclin 1 (Bnc1), mRNA [NM_007562]
CUST_20363_PI419772161	0.00495675	17.2677	down	Enah	NM_001083120	enabled homolog isoform 3
CUST_13614_PI419772161	0.00254879	17.2638	down	Hoxb6	NM_008269	Mus musculus homeobox B6 (Hoxb6), mRNA [NM_008269]
CUST_21395_PI419772161	0.0225335	17.2592	down	T	NM_009309	Mus musculus brachyury (T), mRNA [NM_009309]
CUST_18081_PI419772161	0.00291145	17.2409	down	Vipr2	NM_009511	Mus musculus vasoactive intestinal peptide receptor 2 (Vipr2), mRNA [NM_009511]
CUST_9669_PI419772161	0.000687153	17.2409	down	Fgf13	NM_010200	Mus musculus fibroblast growth factor 13 (Fgf13), mRNA [NM_010200]
CUST_13159_PI419772161	7.95081e-05	17.2368	down	Serbp1	NM_001113564	SERPINE1 mRNA binding protein 1 isoform 2
CUST_10144_PI419772161	0.00113416	17.227	down	Fam111a	NM_026640	Mus musculus family with sequence similarity 111, member A (Fam111a), mRNA [NM_026640]
CUST_18761_PI419772161	0.0322071	17.2088	down	Gm672	NM_201354	Mus musculus predicted gene 672 (Gm672), mRNA [NM_201354]
CUST_11111_PI419772161	9.82926e-05	17.1794	down	Klhl13	NM_026167	Mus musculus kelch-like 13 (Drosophila) (Klhl13), mRNA [NM_026167]
CUST_11063_PI419772161	7.2908e-05	17.1769	down	Ppm1l	NM_178726	Mus musculus protein phosphatase 1 (formerly 2C)-like (Ppm1l), mRNA [NM_178726]
CUST_6462_PI419772161	0.0126347	17.172	down	Nans	NM_053179	Mus musculus N-acetylneuraminic acid synthase (sialic acid synthase) (Nans), mRNA [NM_053179]
CUST_17949_PI419772161	0.000389557	17.166	down	Eif4ebp1	NM_007918	Mus musculus eukaryotic translation initiation factor 4E binding protein 1 (Eif4ebp1), mRNA [NM_007918]
CUST_12905_PI419772161	0.000337127	17.1477	down	Zdhhc15	NM_175358	Mus musculus zinc finger, DHHC domain containing 15 (Zdhhc15), mRNA [NM_175358]
CUST_15215_PI419772161	0.00547351	17.1342	down	Plxnb3	NM_019587	Mus musculus plexin B3 (Plxnb3), mRNA [NM_019587]
CUST_3147_PI419772161	0.00378911	17.1088	down	Hist1h2ab	NM_175660	Mus musculus histone cluster 1, H2ab (Hist1h2ab), mRNA [NM_175660]
CUST_244_PI419772161	0.00349346	17.0769	down	Spats2l	NM_144882	Mus musculus spermatogenesis associated, serine-rich 2-like (Spats2l), transcript variant 1, mRNA [NM_144882]
CUST_3202_PI419772161	0.00326358	17.0404	down	Ngfrap1	NM_001110234	nerve growth factor receptor (TNFRSF16)
CUST_13294_PI419772161	0.00574032	17.0284	down	Baz1b	NM_011714	Mus musculus bromodomain adjacent to zinc finger domain, 1B (Baz1b), mRNA [NM_011714]
CUST_216_PI419772161	0.000226324	17.0257	down	Tmem229b	NM_178745	Mus musculus transmembrane protein 229B (Tmem229b), transcript variant 1, mRNA [NM_178745]
CUST_15438_PI419772161	0.00273839	17.0232	down	Syde1	NM_027875	Mus musculus synapse defective 1, Rho GTPase, homolog 1 (C. elegans) (Syde1), mRNA [NM_027875]
CUST_1486_PI419772161	0.0122052	17.0176	down	Samm50	NM_178614	Mus musculus sorting and assembly machinery component 50 homolog (S. cerevisiae) (Samm50), mRNA [NM_178614]
CUST_18027_PI419772161	0.0300669	17.0085	down	Mlh1	NM_026810	Mus musculus mutL homolog 1 (E. coli) (Mlh1), mRNA [NM_026810]
CUST_19773_PI419772161	0.0164574	16.964	down	Arhgef9	NM_001033329	Mus musculus CDC42 guanine nucleotide exchange factor (GEF) 9 (Arhgef9), mRNA [NM_001033329]
CUST_14526_PI419772161	0.00764107	16.9548	down	Gse1	NM_001145897	genetic suppressor element 1 isoform 3
CUST_1738_PI419772161	0.00145432	16.9153	down	1810027O10Rik	NM_026982	Mus musculus RIKEN cDNA 1810027O10 gene (1810027O10Rik), mRNA [NM_026982]
CUST_4994_PI419772161	0.0105631	16.8957	down	Lrch2	NM_001081173	Mus musculus leucine-rich repeats and calponin homology (CH) domain containing 2 (Lrch2), mRNA [NM_001081173]
CUST_19639_PI419772161	0.00380646	16.8934	down	Dcx	NM_010025	Mus musculus doublecortin (Dcx), transcript variant 4, mRNA [NM_010025]
CUST_10607_PI419772161	0.010127	16.893	down	Olfml3	NM_133859	Mus musculus olfactomedin-like 3 (Olfml3), mRNA [NM_133859]
CUST_7893_PI419772161	0.00222639	16.8738	down	Epb4.1l4b	NM_019427	Mus musculus erythrocyte protein band 4.1-like 4b (Epb4.1l4b), mRNA [NM_019427]
CUST_15592_PI419772161	0.00235238	16.8711	down	Syn2	NM_013681	Mus musculus synapsin II (Syn2), transcript variant IIb, mRNA [NM_013681]
CUST_15272_PI419772161	5.37158e-05	16.8551	down	Sema4d	NM_013660	Mus musculus sema domain, immunoglobulin domain (Ig), transmembrane domain (TM) and short cytoplasmic domain, (semaphorin) 4D (Sema4d), mRNA [NM_013660]
CUST_14593_PI419772161	0.0120987	16.826	down	Ogn	NM_008760	Mus musculus osteoglycin (Ogn), mRNA [NM_008760]
CUST_19908_PI419772161	0.000262267	16.8176	down	Bcl2	NM_177410	Mus musculus B-cell leukemia/lymphoma 2 (Bcl2), transcript variant 2, mRNA [NM_177410]
CUST_20933_PI419772161	0.00467879	16.8115	down	Nono	NM_023144	Mus musculus non-POU-domain-containing, octamer binding protein (Nono), mRNA [NM_023144]
CUST_17964_PI419772161	1.82514e-05	16.7927	down	Pcsk9	NM_153565	Mus musculus proprotein convertase subtilisin/kexin type 9 (Pcsk9), mRNA [NM_153565]
CUST_14881_PI419772161	0.000301477	16.7894	down	Efna4	NM_007910	Mus musculus ephrin A4 (Efna4), mRNA [NM_007910]
CUST_9798_PI419772161	0.000308144	16.7871	down	Pla2g4b	NM_145378	Mus musculus phospholipase A2, group IVB (cytosolic) (Pla2g4b), mRNA [NM_145378]
CUST_13958_PI419772161	0.00219262	16.7671	down	Ldlrap1	NM_145554	Mus musculus low density lipoprotein receptor adaptor protein 1 (Ldlrap1), mRNA [NM_145554]
CUST_16923_PI419772161	0.000560399	16.7629	down	Pyroxd2	NM_029011	Mus musculus pyridine nucleotide-disulphide oxidoreductase domain 2 (Pyroxd2), mRNA [NM_029011]
CUST_13098_PI419772161	0.0017486	16.7605	down	Syt13	NM_030725	Mus musculus synaptotagmin XIII (Syt13), mRNA [NM_030725]
CUST_13699_PI419772161	0.00383711	16.7353	down	Impact	NM_008378	Mus musculus imprinted and ancient (Impact), mRNA [NM_008378]
CUST_13160_PI419772161	6.34383e-05	16.7303	down	Serbp1	NM_001113565	SERPINE1 mRNA binding protein 1 isoform 3
CUST_21274_PI419772161	0.00329906	16.7293	down	Ren2	NM_031193	Mus musculus renin 2 tandem duplication of Ren1 (Ren2), mRNA [NM_031193]
CUST_7757_PI419772161	0.0112753	16.724	down	BC026585	NM_001033284	Mus musculus cDNA sequence BC026585 (BC026585), mRNA [NM_001033284]
CUST_21221_PI419772161	0.0321238	16.6877	down	Slc15a2	NM_021301	Mus musculus solute carrier family 15 (H+/peptide transporter), member 2 (Slc15a2), transcript variant 1, mRNA [NM_021301]
CUST_9655_PI419772161	0.00145831	16.6727	down	Fam171b	NM_175514	Mus musculus family with sequence similarity 171, member B (Fam171b), mRNA [NM_175514]
CUST_18422_PI419772161	0.0024676	16.6418	down	Tph1	NM_009414	Mus musculus tryptophan hydroxylase 1 (Tph1), transcript variant 1, mRNA [NM_009414]
CUST_5639_PI419772161	0.00127501	16.6334	down	Arhgef16	NM_001112744	Mus musculus Rho guanine nucleotide exchange factor (GEF) 16 (Arhgef16), mRNA [NM_001112744]
CUST_9261_PI419772161	0.00427631	16.6326	down	Dusp8	NM_008748	Mus musculus dual specificity phosphatase 8 (Dusp8), mRNA [NM_008748]
CUST_10981_PI419772161	0.000981093	16.6315	down	Bok	NM_016778	BCL2-related ovarian killer protein
CUST_10285_PI419772161	0.000438042	16.6302	down	Col18a1	NM_009929	Mus musculus collagen, type XVIII, alpha 1 (Col18a1), transcript variant 2, mRNA [NM_009929]
CUST_2255_PI419772161	0.00201194	16.5802	down	Zfp161	NM_009547	Mus musculus zinc finger protein 161 (Zfp161), mRNA [NM_009547]
CUST_16361_PI419772161	0.00873746	16.5784	down	B3gnt7	NM_145222	Mus musculus UDP-GlcNAc:betaGal beta-1,3-N-acetylglucosaminyltransferase 7 (B3gnt7), mRNA [NM_145222]
CUST_14042_PI419772161	0.00817802	16.5657	down	Ctla2b	NM_007797	Mus musculus cytotoxic T lymphocyte-associated protein 2 beta (Ctla2b), transcript variant 1, mRNA [NM_007797]
CUST_5542_PI419772161	0.0282287	16.5612	down	2700094K13Rik	NM_001033166	selenoprotein H
CUST_18897_PI419772161	0.00281753	16.5607	down	Cdc25b	NM_001111075	cell division cycle 25B isoform b
CUST_9080_PI419772161	0.00199017	16.54	down	Fdxr	NM_007997	Mus musculus ferredoxin reductase (Fdxr), nuclear gene encoding mitochondrial protein, mRNA [NM_007997]
CUST_16657_PI419772161	0.0217103	16.5343	down	Yap1	NM_009534	Mus musculus yes-associated protein 1 (Yap1), transcript variant 2, mRNA [NM_009534]
CUST_9748_PI419772161	0.00204899	16.521	down	Hecw2	NM_001001883	Mus musculus HECT, C2 and WW domain containing E3 ubiquitin protein ligase 2 (Hecw2), transcript variant 1, mRNA [NM_001001883]
CUST_19433_PI419772161	0.000400658	16.5053	down	Dnmt3a	NM_007872	Mus musculus DNA methyltransferase 3A (Dnmt3a), transcript variant 1, mRNA [NM_007872]
CUST_3401_PI419772161	0.00462069	16.4807	down	Htr1d	NM_008309	Mus musculus 5-hydroxytryptamine (serotonin) receptor 1D (Htr1d), mRNA [NM_008309]
CUST_3548_PI419772161	0.00091774	16.4781	down	Dmrt3	NM_177360	Mus musculus doublesex and mab-3 related transcription factor 3 (Dmrt3), mRNA [NM_177360]
CUST_20593_PI419772161	7.33849e-05	16.4687	down	Sfrp1	NM_013834	Mus musculus secreted frizzled-related protein 1 (Sfrp1), mRNA [NM_013834]
CUST_13500_PI419772161	0.0029007	16.4539	down	Itsn1	NM_001110275	intersectin 1 isoform 2
CUST_17397_PI419772161	0.00268194	16.4496	down	Hba-a1	NM_008218	Mus musculus hemoglobin alpha, adult chain 1 (Hba-a1), mRNA [NM_008218]
CUST_21501_PI419772161	0.000707644	16.4489	down	Wnt9a	NM_139298	Mus musculus wingless-type MMTV integration site 9A (Wnt9a), mRNA [NM_139298]
CUST_12369_PI419772161	0.023481	16.4363	down	Prpf19	NM_134129	Mus musculus PRP19/PSO4 pre-mRNA processing factor 19 homolog (S. cerevisiae) (Prpf19), mRNA [NM_134129]
CUST_19017_PI419772161	0.0479921	16.4311	down	Vamp1	NM_001080557	vesicle-associated membrane protein 1 isoform b
CUST_8409_PI419772161	0.000718142	16.429	down	Ctxn3	NM_001134697	Mus musculus cortexin 3 (Ctxn3), mRNA [NM_001134697]
CUST_10929_PI419772161	0.00336003	16.4165	down	Hn1l	NM_198937	Mus musculus hematological and neurological expressed 1-like (Hn1l), mRNA [NM_198937]
CUST_10992_PI419772161	0.00594915	16.4059	down	Adi1	NM_134052	Mus musculus acireductone dioxygenase 1 (Adi1), mRNA [NM_134052]
CUST_15822_PI419772161	0.00169218	16.3988	down	Llgl1	NM_008502	Mus musculus lethal giant larvae homolog 1 (Drosophila) (Llgl1), transcript variant 2, mRNA [NM_008502]
CUST_14857_PI419772161	0.018677	16.3819	down	Tcf15	NM_009328	Mus musculus transcription factor 15 (Tcf15), mRNA [NM_009328]
CUST_8943_PI419772161	0.0392254	16.3746	down	Rars	NM_025936	Mus musculus arginyl-tRNA synthetase (Rars), mRNA [NM_025936]
CUST_12404_PI419772161	0.00683303	16.3484	down	Fndc4	NM_022424	Mus musculus fibronectin type III domain containing 4 (Fndc4), mRNA [NM_022424]
CUST_10066_PI419772161	0.0329052	16.3482	down	Dci	NM_010023	Mus musculus dodecenoyl-Coenzyme A delta isomerase (3,2 trans-enoyl-Coenyme A isomerase) (Dci), nuclear gene encoding mitochondrial protein, mRNA [NM_010023]
CUST_11_PI419532418	0.00262858	16.3391	down	Nono	NM_023144	non-POU-domain-containing, octamer binding
CUST_1365_PI419772161	0.00378955	16.2577	down	Plscr3	NM_023564	Mus musculus phospholipid scramblase 3 (Plscr3), transcript variant 1, mRNA [NM_023564]
CUST_13158_PI419772161	0.0035622	16.248	down	Serbp1	NM_025814	Mus musculus serpine1 mRNA binding protein 1 (Serbp1), transcript variant 1, mRNA [NM_025814]
CUST_15295_PI419772161	0.00716914	16.2477	down	Cadm4	NM_153112	Mus musculus cell adhesion molecule 4 (Cadm4), mRNA [NM_153112]
CUST_8598_PI419772161	0.000269802	16.2419	down	Hic1	NM_001098203	hypermethylated in cancer 1 isoform 2
CUST_7753_PI419772161	0.000743858	16.2316	down	St3gal2	NM_009179	Mus musculus ST3 beta-galactoside alpha-2,3-sialyltransferase 2 (St3gal2), mRNA [NM_009179]
CUST_12440_PI419772161	0.0152642	16.2287	down	Ddb2	NM_028119	Mus musculus damage specific DNA binding protein 2 (Ddb2), mRNA [NM_028119]
CUST_19942_PI419772161	0.0385022	16.2241	down	Rspo2	NM_172815	Mus musculus R-spondin 2 homolog (Xenopus laevis) (Rspo2), mRNA [NM_172815]
CUST_13673_PI419772161	0.000685575	16.2171	down	Foxp4	NM_001110825	winged-helix repressor FOXP4 isoform 2
CUST_21497_PI419772161	0.000222498	16.2055	down	Myc	NM_010849	Mus musculus myelocytomatosis oncogene (Myc), transcript variant 1, mRNA [NM_010849]
CUST_16777_PI419772161	0.0398531	16.1957	down	Haus2	NM_025475	Mus musculus HAUS augmin-like complex, subunit 2 (Haus2), mRNA [NM_025475]
CUST_19838_PI419772161	0.00100348	16.1943	down	Crym	NM_016669	Mus musculus crystallin, mu (Crym), mRNA [NM_016669]
CUST_10198_PI419772161	0.0401943	16.1853	down	Arhgef1	NM_001130151	Rho guanine nucleotide exchange factor (GEF) 1
CUST_3878_PI419772161	0.00158426	16.1636	down	Clstn2	NM_022319	Mus musculus calsyntenin 2 (Clstn2), mRNA [NM_022319]
CUST_12348_PI419772161	0.000367814	16.1615	down	Inhbb	NM_008381	Mus musculus inhibin beta-B (Inhbb), mRNA [NM_008381]
CUST_6230_PI419772161	0.00828728	16.1547	down	Pprc1	NM_001081214	Mus musculus peroxisome proliferative activated receptor, gamma, coactivator-related 1 (Pprc1), mRNA [NM_001081214]
CUST_3835_PI419772161	0.00399775	16.1517	down	Slc43a3	NM_021398	Mus musculus solute carrier family 43, member 3 (Slc43a3), mRNA [NM_021398]
CUST_20018_PI419772161	0.00262756	16.1291	down	Nrg1	NM_178591	Mus musculus neuregulin 1 (Nrg1), mRNA [NM_178591]
CUST_13096_PI419772161	0.00138151	16.1247	down	Bex1	NM_009052	Mus musculus brain expressed gene 1 (Bex1), mRNA [NM_009052]
CUST_6552_PI419772161	1.40399e-05	16.1165	down	Arhgap17	NM_001122643	nadrin isoform e
CUST_8644_PI419772161	0.00304558	16.1162	down	Adamts7	NM_001003911	Mus musculus a disintegrin-like and metallopeptidase (reprolysin type) with thrombospondin type 1 motif, 7 (Adamts7), mRNA [NM_001003911]
CUST_14205_PI419772161	5.99875e-05	16.1078	down	Fam198b	NM_133187	Mus musculus family with sequence similarity 198, member B (Fam198b), mRNA [NM_133187]
CUST_18523_PI419772161	0.000608762	16.0885	down	Sox3	NM_009237	SRY-box containing gene 3
CUST_10288_PI419772161	4.68816e-05	16.0765	down	Clcn5	NM_016691	Mus musculus chloride channel 5 (Clcn5), mRNA [NM_016691]
CUST_10025_PI419772161	0.00431173	16.0672	down	Myo9b	NM_001142323	myosin IXb isoform 2
CUST_16786_PI419772161	0.0250044	16.0661	down	Htra1	NM_019564	Mus musculus HtrA serine peptidase 1 (Htra1), mRNA [NM_019564]
CUST_4204_PI419772161	0.000329956	16.0627	down	Rasgef1c	NM_029004	Mus musculus RasGEF domain family, member 1C (Rasgef1c), mRNA [NM_029004]
CUST_8502_PI419772161	0.000153197	16.0383	down	Rrad	NM_019662	Mus musculus Ras-related associated with diabetes (Rrad), mRNA [NM_019662]
CUST_3905_PI419772161	0.00147084	16.027	down	Zfp395	NM_199029	Mus musculus zinc finger protein 395 (Zfp395), mRNA [NM_199029]
CUST_5600_PI419772161	0.0171115	16.0186	down	Mrps5	NM_029963	Mus musculus mitochondrial ribosomal protein S5 (Mrps5), nuclear gene encoding mitochondrial protein, mRNA [NM_029963]
CUST_13224_PI419772161	0.000430077	16.0186	down	Gpr124	NM_054044	Mus musculus G protein-coupled receptor 124 (Gpr124), mRNA [NM_054044]
CUST_1698_PI419772161	0.00851332	16.0016	down	Nup85	NM_001002929	Mus musculus nucleoporin 85 (Nup85), mRNA [NM_001002929]
CUST_7473_PI419772161	0.00345597	15.9299	down	Sdpr	NM_138741	Mus musculus serum deprivation response (Sdpr), mRNA [NM_138741]
CUST_10681_PI419772161	0.0146081	15.9287	down	Myl9	NM_172118	Mus musculus myosin, light polypeptide 9, regulatory (Myl9), mRNA [NM_172118]
CUST_22361_PI419772161	0.000944953	15.9195	down	Ascl2	NM_008554	Mus musculus achaete-scute complex homolog 2 (Drosophila) (Ascl2), mRNA [NM_008554]
CUST_14374_PI419772161	0.00568741	15.9169	down	Echdc2	NM_026728	Mus musculus enoyl Coenzyme A hydratase domain containing 2 (Echdc2), mRNA [NM_026728]
CUST_13468_PI419772161	0.000396862	15.9141	down	Bmf	NM_138313	Mus musculus BCL2 modifying factor (Bmf), mRNA [NM_138313]
CUST_12902_PI419772161	0.000660824	15.9087	down	Pde8b	NM_172263	Mus musculus phosphodiesterase 8B (Pde8b), transcript variant 2, mRNA [NM_172263]
CUST_5523_PI419772161	0.000986955	15.8972	down	Tceal5	NM_177919	transcription elongation factor A (SII)-like 5
CUST_12339_PI419772161	0.00196751	15.8946	down	Cenpa	NM_007681	Mus musculus centromere protein A (Cenpa), mRNA [NM_007681]
CUST_18287_PI419772161	0.00639854	15.856	down	Zfp869	NM_001039965	zinc finger protein 869
CUST_16339_PI419772161	0.0459424	15.855	down	Lrrc57	NM_001159609	leucine rich repeat containing 57 isoform b
CUST_14176_PI419772161	0.00436495	15.8525	down	Piwil4	NM_177905	piwi-like 4
CUST_18394_PI419772161	0.00723019	15.8127	down	Atp1a1	NM_144900	Mus musculus ATPase, Na+/K+ transporting, alpha 1 polypeptide (Atp1a1), mRNA [NM_144900]
CUST_11166_PI419772161	0.0121681	15.8117	down	Angptl6	NM_145154	Mus musculus angiopoietin-like 6 (Angptl6), mRNA [NM_145154]
CUST_10393_PI419772161	0.00908316	15.8077	down	Mcm6	NM_008567	Mus musculus minichromosome maintenance deficient 6 (MIS5 homolog, S. pombe) (S. cerevisiae) (Mcm6), mRNA [NM_008567]
CUST_7118_PI419772161	0.00117908	15.7918	down	Dpysl4	NM_011993	Mus musculus dihydropyrimidinase-like 4 (Dpysl4), mRNA [NM_011993]
CUST_3113_PI419772161	0.0166797	15.7825	down	Cecr6	NM_033567	Mus musculus cat eye syndrome chromosome region, candidate 6 homolog (human) (Cecr6), mRNA [NM_033567]
CUST_17847_PI419772161	0.00963295	15.7762	down	Lrdd	NM_022654	Mus musculus leucine-rich and death domain containing (Lrdd), mRNA [NM_022654]
CUST_19857_PI419772161	0.000179748	15.7581	down	Tcf7	NM_009331	Mus musculus transcription factor 7, T-cell specific (Tcf7), mRNA [NM_009331]
CUST_9160_PI419772161	0.028816	15.7511	down	Pcyox1	NM_025823	Mus musculus prenylcysteine oxidase 1 (Pcyox1), mRNA [NM_025823]
CUST_15299_PI419772161	0.00206705	15.7476	down	Sema6b	NM_001130456	semaphorin 6B
CUST_11947_PI419772161	0.000915	15.7474	down	Praf2	NM_138602	Mus musculus PRA1 domain family 2 (Praf2), mRNA [NM_138602]
CUST_21445_PI419772161	0.000110606	15.7182	down	Heph	NM_001159627	hephaestin isoform 1
CUST_13052_PI419772161	0.00131137	15.6967	down	Cda	NM_028176	Mus musculus cytidine deaminase (Cda), mRNA [NM_028176]
CUST_21704_PI419772161	2.98473e-05	15.6918	down	Lrfn4	NM_153388	Mus musculus leucine rich repeat and fibronectin type III domain containing 4 (Lrfn4), mRNA [NM_153388]
CUST_20942_PI419772161	0.000826764	15.671	down	Snca	NM_009221	synuclein, alpha
CUST_8003_PI419772161	0.000641044	15.6687	down	Zcchc5	NM_199468	Mus musculus zinc finger, CCHC domain containing 5 (Zcchc5), mRNA [NM_199468]
CUST_8421_PI419772161	0.003235	15.652	down	Pnldc1	NM_001034866	poly(A)-specific ribonuclease (PARN)-like domain
CUST_12494_PI419772161	0.00208781	15.6497	down	Schip1	NM_013928	Mus musculus schwannomin interacting protein 1 (Schip1), transcript variant 4, mRNA [NM_013928]
CUST_12971_PI419772161	0.00099041	15.63	down	Cpz	NM_153107	Mus musculus carboxypeptidase Z (Cpz), mRNA [NM_153107]
CUST_7174_PI419772161	0.00167836	15.6276	down	Zfhx4	NM_030708	Mus musculus zinc finger homeodomain 4 (Zfhx4), mRNA [NM_030708]
CUST_9486_PI419772161	0.0129608	15.6276	down	Suv420h1	NM_144871	Mus musculus suppressor of variegation 4-20 homolog 1 (Drosophila) (Suv420h1), transcript variant 3, mRNA [NM_144871]
CUST_15301_PI419772161	0.00173145	15.5985	down	Il10ra	NM_008348	Mus musculus interleukin 10 receptor, alpha (Il10ra), mRNA [NM_008348]
CUST_16308_PI419772161	0.00123019	15.5887	down	Acvrl1	NM_009612	Mus musculus activin A receptor, type II-like 1 (Acvrl1), mRNA [NM_009612]
CUST_13745_PI419772161	0.00163707	15.5721	down	Adrb3	NM_013462	adrenergic receptor, beta 3
CUST_9817_PI419772161	0.0033607	15.5686	down	Tbc1d2b	NM_194334	Mus musculus TBC1 domain family, member 2B (Tbc1d2b), mRNA [NM_194334]
CUST_20472_PI419772161	0.00247138	15.5564	down	Prdx2	NM_011563	Mus musculus peroxiredoxin 2 (Prdx2), nuclear gene encoding mitochondrial protein, mRNA [NM_011563]
CUST_14585_PI419772161	0.00292494	15.5546	down	Plxna4	NM_175750	Mus musculus plexin A4 (Plxna4), mRNA [NM_175750]
CUST_16145_PI419772161	0.0200297	15.5484	down	Tcirg1	NM_001136091	T-cell, immune regulator 1 isoform 2
CUST_17425_PI419772161	0.00163459	15.5345	down	Ppp2r1a	NM_016891	Mus musculus protein phosphatase 2 (formerly 2A), regulatory subunit A (PR 65), alpha isoform (Ppp2r1a), mRNA [NM_016891]
CUST_5285_PI419772161	0.0187769	15.485	down	Zcchc14	NM_080855	Mus musculus zinc finger, CCHC domain containing 14 (Zcchc14), mRNA [NM_080855]
CUST_9513_PI419772161	0.00326987	15.4841	down	BC021891	NM_145608	Mus musculus cDNA sequence BC021891 (BC021891), mRNA [NM_145608]
CUST_22207_PI419772161	2.67189e-05	15.465	down	Samd4	NM_028966	sterile alpha motif domain containing 4 isoform
CUST_6094_PI419772161	0.00946421	15.4619	down	Aagab	NM_025857	Mus musculus alpha- and gamma-adaptin binding protein (Aagab), mRNA [NM_025857]
CUST_21449_PI419772161	0.00120483	15.4559	down	Heph	NM_001159628	hephaestin isoform 3
CUST_16214_PI419772161	0.00194023	15.4524	down	Plagl1	NM_009538	Mus musculus pleiomorphic adenoma gene-like 1 (Plagl1), mRNA [NM_009538]
CUST_9060_PI419772161	0.0259999	15.4248	down	Asl	NM_133768	Mus musculus argininosuccinate lyase (Asl), mRNA [NM_133768]
CUST_18272_PI419772161	0.00637857	15.424	down	Zfp871	NM_172458	Mus musculus zinc finger protein 871 (Zfp871), mRNA [NM_172458]
CUST_15824_PI419772161	0.000672122	15.4219	down	Llgl1	NM_001159405	lethal giant larvae homolog 1 isoform 1
CUST_9343_PI419772161	0.00627398	15.4023	down	Ube2e3	NM_009454	Mus musculus ubiquitin-conjugating enzyme E2E 3, UBC4/5 homolog (yeast) (Ube2e3), mRNA [NM_009454]
CUST_13222_PI419772161	0.0130155	15.4014	down	Clcn7	NM_011930	Mus musculus chloride channel 7 (Clcn7), mRNA [NM_011930]
CUST_20629_PI419772161	0.000182282	15.3872	down	Ldlr	NM_010700	Mus musculus low density lipoprotein receptor (Ldlr), mRNA [NM_010700]
CUST_16813_PI419772161	0.0064319	15.3741	down	Tmeff2	NM_019790	Mus musculus transmembrane protein with EGF-like and two follistatin-like domains 2 (Tmeff2), mRNA [NM_019790]
CUST_5399_PI419772161	0.0134795	15.3105	down	Slc2a6	NM_172659	Mus musculus solute carrier family 2 (facilitated glucose transporter), member 6 (Slc2a6), transcript variant 1, mRNA [NM_172659]
CUST_17843_PI419772161	0.0286388	15.3086	down	Eddm3b	NM_203508	Mus musculus epididymal protein 3B (Eddm3b), mRNA [NM_203508]
CUST_12399_PI419772161	0.00847003	15.3075	down	Raet1e	NM_198193	Mus musculus retinoic acid early transcript 1E (Raet1e), mRNA [NM_198193]
CUST_11165_PI419772161	0.001401	15.3014	down	Fgd1	NM_008001	Mus musculus FYVE, RhoGEF and PH domain containing 1 (Fgd1), mRNA [NM_008001]
A_51_P163444	0.00101781	15.2569	down	Carhsp1	NM_025821	Mus musculus calcium regulated heat stable protein 1 (Carhsp1), mRNA [NM_025821]
CUST_15515_PI419772161	0.0117761	15.2309	down	Entpd2	NM_009849	Mus musculus ectonucleoside triphosphate diphosphohydrolase 2 (Entpd2), mRNA [NM_009849]
CUST_1513_PI419772161	0.00647271	15.2294	down	Mxra7	NM_026280	Mus musculus matrix-remodelling associated 7 (Mxra7), mRNA [NM_026280]
CUST_11116_PI419772161	0.0135198	15.2072	down	Zfp251	NM_001007568	Mus musculus zinc finger protein 251 (Zfp251), mRNA [NM_001007568]
CUST_18296_PI419772161	0.0173786	15.1946	down	Zfp872	NM_001033813	zinc finger protein 872
CUST_9986_PI419772161	1.45406e-05	15.1916	down	Lamb1-1	NM_008482	Mus musculus laminin B1 subunit 1 (Lamb1-1), mRNA [NM_008482]
CUST_21503_PI419772161	0.0174065	15.1876	down	Meox2	NM_008584	Mus musculus mesenchyme homeobox 2 (Meox2), mRNA [NM_008584]
CUST_11106_PI419772161	0.0106077	15.1785	down	Lamc3	NM_011836	Mus musculus laminin gamma 3 (Lamc3), mRNA [NM_011836]
CUST_21225_PI419772161	0.000340469	15.1776	down	Nefm	NM_008691	Mus musculus neurofilament, medium polypeptide (Nefm), mRNA [NM_008691]
CUST_4126_PI419772161	0.000214411	15.1594	down	Frrs1	NM_009146	Mus musculus ferric-chelate reductase 1 (Frrs1), transcript variant 2, mRNA [NM_009146]
CUST_9580_PI419772161	0.00185903	15.1485	down	Srpk3	NM_019684	Mus musculus serine/arginine-rich protein specific kinase 3 (Srpk3), mRNA [NM_019684]
CUST_6398_PI419772161	0.000476089	15.1251	down	Ltbp3	NM_008520	Mus musculus latent transforming growth factor beta binding protein 3 (Ltbp3), mRNA [NM_008520]
CUST_5149_PI419772161	0.0221436	15.1196	down	Pdlim7	NM_001114087	PDZ and LIM domain 7 isoform b
CUST_15823_PI419772161	0.00156931	15.1039	down	Llgl1	NM_001159404	lethal giant larvae homolog 1 isoform 3
CUST_17613_PI419772161	0.00677298	15.1038	down	Nudt14	NM_025399	Mus musculus nudix (nucleoside diphosphate linked moiety X)-type motif 14 (Nudt14), mRNA [NM_025399]
CUST_226_PI419772161	0.00375433	15.1031	down	Ctu1	NM_145582	Mus musculus cytosolic thiouridylase subunit 1 homolog (S. pombe) (Ctu1), mRNA [NM_145582]
CUST_18399_PI419772161	0.000477425	15.0919	down	Phlda2	NM_009434	Mus musculus pleckstrin homology-like domain, family A, member 2 (Phlda2), mRNA [NM_009434]
CUST_18303_PI419772161	0.0459	15.0906	down	Klk8	NM_008940	Mus musculus kallikrein related-peptidase 8 (Klk8), mRNA [NM_008940]
CUST_21249_PI419772161	0.00434823	15.0576	down	Tsc22d1	NM_009366	Mus musculus TSC22 domain family, member 1 (Tsc22d1), transcript variant 2, mRNA [NM_009366]
CUST_13021_PI419772161	8.76733e-05	15.0346	down	Tshz3	NM_172298	Mus musculus teashirt zinc finger family member 3 (Tshz3), mRNA [NM_172298]
CUST_17900_PI419772161	0.00779185	15.0336	down	Krt17	NM_010663	Mus musculus keratin 17 (Krt17), mRNA [NM_010663]
CUST_19397_PI419772161	0.00202103	15.0302	down	Ckb	NM_021273	Mus musculus creatine kinase, brain (Ckb), mRNA [NM_021273]
CUST_21125_PI419772161	0.0261768	14.9808	down	Trp53	NM_011640	Mus musculus transformation related protein 53 (Trp53), transcript variant 1, mRNA [NM_011640]
CUST_9240_PI419772161	0.0198054	14.9782	down	Gamt	NM_010255	Mus musculus guanidinoacetate methyltransferase (Gamt), mRNA [NM_010255]
CUST_5942_PI419772161	0.000119147	14.9679	down	Frrs1	NM_001113478	ferric-chelate reductase 1
CUST_19817_PI419772161	0.00148285	14.9534	down	Nox4	NM_015760	Mus musculus NADPH oxidase 4 (Nox4), mRNA [NM_015760]
CUST_8727_PI419772161	0.0386844	14.9466	down	Mybbp1a	NM_016776	Mus musculus MYB binding protein (P160) 1a (Mybbp1a), mRNA [NM_016776]
CUST_8013_PI419772161	0.00159507	14.9315	down	Scube1	NM_022723	Mus musculus signal peptide, CUB domain, EGF-like 1 (Scube1), mRNA [NM_022723]
CUST_16400_PI419772161	0.000351999	14.9305	down	Sema6d	NM_199241	Mus musculus sema domain, transmembrane domain (TM), and cytoplasmic domain, (semaphorin) 6D (Sema6d), transcript variant 4, mRNA [NM_199241]
CUST_18470_PI419772161	0.00417918	14.9218	down	Zbtb16	NM_001033324	zinc finger and BTB domain containing 16
CUST_16742_PI419772161	0.0425485	14.9173	down	1500015O10Rik	NM_024283	Mus musculus RIKEN cDNA 1500015O10 gene (1500015O10Rik), mRNA [NM_024283]
CUST_7437_PI419772161	5.29094e-05	14.9149	down	3632451O06Rik	NM_026142	Mus musculus RIKEN cDNA 3632451O06 gene (3632451O06Rik), mRNA [NM_026142]
CUST_18418_PI419772161	0.00583742	14.907	down	Ednra	NM_010332	Mus musculus endothelin receptor type A (Ednra), mRNA [NM_010332]
CUST_7619_PI419772161	0.000234033	14.8967	down	Dusp9	NM_029352	Mus musculus dual specificity phosphatase 9 (Dusp9), mRNA [NM_029352]
CUST_15379_PI419772161	0.0469527	14.8954	down	Ext2	NM_010163	Mus musculus exostoses (multiple) 2 (Ext2), mRNA [NM_010163]
CUST_11631_PI419772161	0.00409017	14.8666	down	Fam65b	NM_029679	Mus musculus family with sequence similarity 65, member B (Fam65b), transcript variant 1, mRNA [NM_029679]
CUST_10427_PI419772161	0.00492228	14.8554	down	Rab11b	NM_008997	Mus musculus RAB11B, member RAS oncogene family (Rab11b), mRNA [NM_008997]
CUST_19813_PI419772161	0.00186322	14.8328	down	Usf1	NM_009480	Mus musculus upstream transcription factor 1 (Usf1), mRNA [NM_009480]
CUST_13493_PI419772161	0.000512656	14.8282	down	Speg	NM_001085371	Mus musculus SPEG complex locus (Speg), transcript variant 3, mRNA [NM_001085371]
CUST_45_PI419772161	0.0144653	14.7912	down	Fam180a	NM_173375	Mus musculus family with sequence similarity 180, member A (Fam180a), mRNA [NM_173375]
CUST_20406_PI419772161	0.000135281	14.7886	down	Nfatc4	NM_023699	Mus musculus nuclear factor of activated T-cells, cytoplasmic, calcineurin-dependent 4 (Nfatc4), transcript variant 1, mRNA [NM_023699]
CUST_15128_PI419772161	0.00251084	14.7834	down	Plxdc2	NM_026162	Mus musculus plexin domain containing 2 (Plxdc2), mRNA [NM_026162]
CUST_9349_PI419772161	0.00114337	14.781	down	Pipox	NM_008952	Mus musculus pipecolic acid oxidase (Pipox), mRNA [NM_008952]
CUST_2345_PI419772161	0.00228507	14.7617	down	Rnf208	NM_176834	Mus musculus ring finger protein 208 (Rnf208), mRNA [NM_176834]
CUST_18238_PI419772161	0.0114153	14.7461	down	Pts	NM_011220	Mus musculus 6-pyruvoyl-tetrahydropterin synthase (Pts), mRNA [NM_011220]
CUST_16470_PI419772161	0.000297491	14.7408	down	Ldb2	NM_001077398	Mus musculus LIM domain binding 2 (Ldb2), transcript variant 2, mRNA [NM_001077398]
CUST_21060_PI419772161	0.0200881	14.7396	down	P2rx7	NM_001038839	purinergic receptor P2X7 isoform c
CUST_11182_PI419772161	0.0132335	14.7312	down	Slc44a2	NM_152808	Mus musculus solute carrier family 44, member 2 (Slc44a2), mRNA [NM_152808]
CUST_3082_PI419772161	0.00195951	14.7236	down	Kcnj15	NM_019664	Mus musculus potassium inwardly-rectifying channel, subfamily J, member 15 (Kcnj15), transcript variant 2, mRNA [NM_019664]
CUST_9090_PI419772161	0.0142669	14.7126	down	Pck2	NM_028994	Mus musculus phosphoenolpyruvate carboxykinase 2 (mitochondrial) (Pck2), nuclear gene encoding mitochondrial protein, mRNA [NM_028994]
CUST_22205_PI419772161	0.000337777	14.7094	down	Samd4	NM_001037221	Mus musculus sterile alpha motif domain containing 4 (Samd4), transcript variant 1, mRNA [NM_001037221]
CUST_9893_PI419772161	0.000651054	14.689	down	1190003J15Rik	NM_029821	Mus musculus RIKEN cDNA 1190003J15 gene (1190003J15Rik), mRNA [NM_029821]
CUST_21443_PI419772161	0.000645188	14.681	down	Heph	NM_010417	Mus musculus hephaestin (Heph), transcript variant 1, mRNA [NM_010417]
CUST_10274_PI419772161	0.00056106	14.6756	down	Serpinf1	NM_011340	Mus musculus serine (or cysteine) peptidase inhibitor, clade F, member 1 (Serpinf1), mRNA [NM_011340]
CUST_5877_PI419772161	0.00300164	14.671	down	Arhgap6	NM_178754	Rho GTPase activating protein 6 isoform b
CUST_17574_PI419772161	0.0206406	14.6651	down	Psap	NM_011179	Mus musculus prosaposin (Psap), transcript variant 2, mRNA [NM_011179]
CUST_12959_PI419772161	0.0121889	14.6561	down	Tspan17	NM_028841	Mus musculus tetraspanin 17 (Tspan17), mRNA [NM_028841]
CUST_13965_PI419772161	0.000524041	14.6542	down	Ltbp4	NM_001113549	latent transforming growth factor beta binding
CUST_19521_PI419772161	0.00100354	14.6522	down	Apba2	NM_007461	Mus musculus amyloid beta (A4) precursor protein-binding, family A, member 2 (Apba2), mRNA [NM_007461]
CUST_20800_PI419772161	0.00051629	14.6504	down	Jun	NM_010591	Mus musculus Jun oncogene (Jun), mRNA [NM_010591]
CUST_1681_PI419772161	0.000593007	14.6431	down	Sh3bp1	NM_009164	Mus musculus SH3-domain binding protein 1 (Sh3bp1), mRNA [NM_009164]
CUST_16148_PI419772161	0.00841927	14.6428	down	Nr2e1	NM_152229	Mus musculus nuclear receptor subfamily 2, group E, member 1 (Nr2e1), mRNA [NM_152229]
CUST_8335_PI419772161	0.0356659	14.6365	down	Prickle2	NM_001081146	prickle-like 2 isoform a
CUST_12340_PI419772161	0.0134671	14.6316	down	Metapl1	NM_025633	Mus musculus methionine aminopeptidase-like 1 (Metapl1), mRNA [NM_025633]
CUST_16626_PI419772161	0.0359146	14.6275	down	Frk	NM_010237	Mus musculus fyn-related kinase (Frk), transcript variant 2, mRNA [NM_010237]
CUST_12486_PI419772161	0.00128825	14.6108	down	Akap5	NM_001101471	Mus musculus A kinase (PRKA) anchor protein 5 (Akap5), mRNA [NM_001101471]
CUST_21261_PI419772161	0.0015972	14.6032	down	P2ry1	NM_008772	Mus musculus purinergic receptor P2Y, G-protein coupled 1 (P2ry1), mRNA [NM_008772]
CUST_16469_PI419772161	0.000252636	14.5932	down	Ldb2	NM_010698	LIM domain binding 2 isoform 1
CUST_20674_PI419772161	0.000107051	14.5894	down	Phlda3	NM_013750	Mus musculus pleckstrin homology-like domain, family A, member 3 (Phlda3), mRNA [NM_013750]
CUST_20873_PI419772161	0.00228291	14.5791	down	Bcl10	NM_009740	Mus musculus B-cell leukemia/lymphoma 10 (Bcl10), mRNA [NM_009740]
CUST_16508_PI419772161	0.00302092	14.5756	down	Adcy5	NM_001012765	Mus musculus adenylate cyclase 5 (Adcy5), mRNA [NM_001012765]
CUST_20440_PI419772161	0.0317377	14.5726	down	Ctsb	NM_007798	Mus musculus cathepsin B (Ctsb), mRNA [NM_007798]
CUST_5748_PI419772161	0.0278513	14.5665	down	Trim61	NM_153110	Mus musculus tripartite motif-containing 61 (Trim61), transcript variant 1, mRNA [NM_153110]
CUST_6308_PI419772161	0.00237095	14.5479	down	Pdzd4	NM_001029868	Mus musculus PDZ domain containing 4 (Pdzd4), mRNA [NM_001029868]
CUST_13198_PI419772161	0.00813605	14.5465	down	Amigo1	NM_146137	Mus musculus adhesion molecule with Ig like domain 1 (Amigo1), transcript variant 1, mRNA [NM_146137]
CUST_7621_PI419772161	0.00133323	14.5398	down	Rhoc	NM_007484	Mus musculus ras homolog gene family, member C (Rhoc), mRNA [NM_007484]
CUST_22174_PI419772161	0.000294877	14.5371	down	Fkbp10	NM_010221	Mus musculus FK506 binding protein 10 (Fkbp10), transcript variant 1, mRNA [NM_010221]
CUST_1205_PI419772161	0.0015014	14.5264	down	Nlrp4c	NM_031389	Mus musculus NLR family, pyrin domain containing 4C (Nlrp4c), mRNA [NM_031389]
CUST_21190_PI419772161	0.00401081	14.5259	down	Darc	NM_010045	Mus musculus Duffy blood group, chemokine receptor (Darc), mRNA [NM_010045]
A_51_P505868	0.0170351	14.5213	down	Lhfp	NM_175386	Mus musculus lipoma HMGIC fusion partner (Lhfp), mRNA [NM_175386]
CUST_13167_PI419772161	0.000847858	14.5151	down	Rps15a	NM_170669	Mus musculus ribosomal protein S15A (Rps15a), mRNA [NM_170669]
CUST_16421_PI419772161	0.0110651	14.4736	down	Dlgap4	NM_001042487	discs, large homolog-associated protein 4
CUST_3114_PI419772161	0.00570602	14.464	down	Fbxo41	NM_001001160	Mus musculus F-box protein 41 (Fbxo41), mRNA [NM_001001160]
CUST_8567_PI419772161	0.00256405	14.4603	down	Btbd11	NM_028709	Mus musculus BTB (POZ) domain containing 11 (Btbd11), transcript variant 1, mRNA [NM_028709]
CUST_14558_PI419772161	0.00140196	14.4602	down	Rpl13a	NM_009438	Mus musculus ribosomal protein L13A (Rpl13a), mRNA [NM_009438]
CUST_432_PI419772161	0.000305242	14.4598	down	1600021P15Rik	NM_177718	Mus musculus RIKEN cDNA 1600021P15 gene (1600021P15Rik), mRNA [NM_177718]
CUST_12746_PI419772161	0.0117288	14.4566	down	Ptov1	NM_133949	Mus musculus prostate tumor over expressed gene 1 (Ptov1), mRNA [NM_133949]
CUST_19386_PI419772161	0.00424633	14.4519	down	Kdm6b	NM_001017426	Mus musculus KDM1 lysine (K)-specific demethylase 6B (Kdm6b), mRNA [NM_001017426]
CUST_9816_PI419772161	0.000437887	14.4511	down	Tro	NM_001002272	Mus musculus trophinin (Tro), transcript variant 1, mRNA [NM_001002272]
CUST_19918_PI419772161	0.00140033	14.447	down	Pgr	NM_008829	Mus musculus progesterone receptor (Pgr), mRNA [NM_008829]
CUST_10248_PI419772161	0.000247422	14.4436	down	Chst11	NM_021439	Mus musculus carbohydrate sulfotransferase 11 (Chst11), mRNA [NM_021439]
CUST_8220_PI419772161	0.00355266	14.442	down	Hmcn1	NM_001024720	Mus musculus hemicentin 1 (Hmcn1), mRNA [NM_001024720]
CUST_22425_PI419772161	0.00318021	14.4382	down	Mcm4	NM_008565	Mus musculus minichromosome maintenance deficient 4 homolog (S. cerevisiae) (Mcm4), mRNA [NM_008565]
CUST_9884_PI419772161	0.0199572	14.4358	down	Zc3h4	NM_198631	Mus musculus zinc finger CCCH-type containing 4 (Zc3h4), mRNA [NM_198631]
CUST_136_PI419772161	0.00724407	14.4333	down	Prelid2	NM_029942	Mus musculus PRELI domain containing 2 (Prelid2), mRNA [NM_029942]
CUST_5490_PI419772161	0.00898817	14.4295	down	Arrdc4	NM_001042592	Mus musculus arrestin domain containing 4 (Arrdc4), transcript variant 1, mRNA [NM_001042592]
CUST_13885_PI419772161	0.0018015	14.4149	down	Panx1	NM_019482	Mus musculus pannexin 1 (Panx1), mRNA [NM_019482]
CUST_16207_PI419772161	0.00605038	14.4051	down	Ptgis	NM_008968	Mus musculus prostaglandin I2 (prostacyclin) synthase (Ptgis), mRNA [NM_008968]
CUST_6829_PI419772161	0.0349744	14.3958	down	Ankrd34b	NM_175455	Mus musculus ankyrin repeat domain 34B (Ankrd34b), mRNA [NM_175455]
CUST_20777_PI419772161	0.00290345	14.3953	down	Cd1d1	NM_007639	Mus musculus CD1d1 antigen (Cd1d1), mRNA [NM_007639]
CUST_20711_PI419772161	0.00339743	14.3882	down	Gnaz	NM_010311	Mus musculus guanine nucleotide binding protein, alpha z subunit (Gnaz), mRNA [NM_010311]
CUST_18383_PI419772161	0.00234465	14.3869	down	Chrnb1	NM_009601	Mus musculus cholinergic receptor, nicotinic, beta polypeptide 1 (muscle) (Chrnb1), mRNA [NM_009601]
CUST_13773_PI419772161	0.0245983	14.3683	down	Rgs9bp	NM_145840	Mus musculus regulator of G-protein signalling 9 binding protein (Rgs9bp), mRNA [NM_145840]
CUST_7976_PI419772161	0.0321934	14.3681	down	H2-T22	NM_010397	Mus musculus histocompatibility 2, T region locus 22 (H2-T22), mRNA [NM_010397]
CUST_6063_PI419772161	0.00434869	14.3592	down	Myadm	NM_001093765	Mus musculus myeloid-associated differentiation marker (Myadm), transcript variant 2, mRNA [NM_001093765]
CUST_6548_PI419772161	0.00143022	14.351	down	Arhgap17	NM_144529	Mus musculus Rho GTPase activating protein 17 (Arhgap17), transcript variant 1, mRNA [NM_144529]
CUST_7360_PI419772161	0.00149217	14.3509	down	Nin	NM_008697	Mus musculus ninein (Nin), transcript variant 2, mRNA [NM_008697]
CUST_21981_PI419772161	0.00625252	14.3452	down	Pold1	NM_011131	Mus musculus polymerase (DNA directed), delta 1, catalytic subunit (Pold1), mRNA [NM_011131]
CUST_3148_PI419772161	0.00625525	14.3216	down	Rhox4b	NM_021300	reproductive homeobox 4B
A_51_P468505	0.00717608	14.2664	down	2810408M09Rik	NM_001007581	Mus musculus RIKEN cDNA 2810408M09 gene (2810408M09Rik), mRNA [NM_001007581]
CUST_15475_PI419772161	0.00393763	14.2632	down	Bcl11b	NM_021399	Mus musculus B-cell leukemia/lymphoma 11B (Bcl11b), transcript variant 2, mRNA [NM_021399]
CUST_20359_PI419772161	0.00893236	14.2419	down	Enah	NM_010135	Mus musculus enabled homolog (Drosophila) (Enah), transcript variant 1, mRNA [NM_010135]
CUST_5385_PI419772161	0.00895538	14.2355	down	Vat1	NM_012037	Mus musculus vesicle amine transport protein 1 homolog (T californica) (Vat1), mRNA [NM_012037]
CUST_2964_PI419772161	0.00114438	14.2285	down	Odz4	NM_011858	Mus musculus odd Oz/ten-m homolog 4 (Drosophila) (Odz4), mRNA [NM_011858]
CUST_17901_PI419772161	0.00981374	14.2148	down	Chic1	NM_009767	Mus musculus cysteine-rich hydrophobic domain 1 (Chic1), mRNA [NM_009767]
CUST_12055_PI419772161	0.0319896	14.2085	down	Tmem71	NM_172514	Mus musculus transmembrane protein 71 (Tmem71), mRNA [NM_172514]
CUST_9382_PI419772161	0.00207744	14.189	down	Cyp7b1	NM_007825	Mus musculus cytochrome P450, family 7, subfamily b, polypeptide 1 (Cyp7b1), mRNA [NM_007825]
CUST_11235_PI419772161	0.000340027	14.1593	down	Klf8	NM_173780	Mus musculus Kruppel-like factor 8 (Klf8), mRNA [NM_173780]
CUST_21462_PI419772161	0.000714099	14.1572	down	Rarb	NM_011243	Mus musculus retinoic acid receptor, beta (Rarb), mRNA [NM_011243]
CUST_14370_PI419772161	0.0060558	14.1308	down	A2bp1	NM_021477	Mus musculus ataxin 2 binding protein 1 (A2bp1), transcript variant 2, mRNA [NM_021477]
CUST_8376_PI419772161	0.0195924	14.1154	down	Arhgap31	NM_020260	Mus musculus Rho GTPase activating protein 31 (Arhgap31), mRNA [NM_020260]
CUST_18595_PI419772161	7.19653e-07	14.1016	down	Gng13	NM_022422	Mus musculus guanine nucleotide binding protein (G protein), gamma 13 (Gng13), mRNA [NM_022422]
CUST_2_PI419532418	0.00179223	14.0875	down	Rpl13a	NM_009438	ribosomal protein L13A
CUST_5834_PI419772161	0.0143726	14.0851	down	Cyp20a1	NM_030013	Mus musculus cytochrome P450, family 20, subfamily A, polypeptide 1 (Cyp20a1), mRNA [NM_030013]
CUST_21866_PI419772161	0.000252006	14.079	down	Sp6	NM_031183	Mus musculus trans-acting transcription factor 6 (Sp6), mRNA [NM_031183]
CUST_21904_PI419772161	0.00239101	14.071	down	Chst14	NM_028117	Mus musculus carbohydrate (N-acetylgalactosamine 4-0) sulfotransferase 14 (Chst14), mRNA [NM_028117]
CUST_5016_PI419772161	0.00281651	14.0666	down	Klf7	NM_033563	Mus musculus Kruppel-like factor 7 (ubiquitous) (Klf7), mRNA [NM_033563]
CUST_1302_PI419772161	0.005746	14.0648	down	Slc12a9	NM_031406	Mus musculus solute carrier family 12 (potassium/chloride transporters), member 9 (Slc12a9), mRNA [NM_031406]
CUST_8179_PI419772161	0.00462616	14.0622	down	Psme1	NM_011189	Mus musculus proteasome (prosome, macropain) 28 subunit, alpha (Psme1), mRNA [NM_011189]
CUST_17648_PI419772161	0.0105429	14.0455	down	Plcb3	NM_008874	Mus musculus phospholipase C, beta 3 (Plcb3), mRNA [NM_008874]
CUST_4339_PI419772161	0.00248597	14.0314	down	Bcorl1	NM_178782	Mus musculus BCL6 co-repressor-like 1 (Bcorl1), mRNA [NM_178782]
CUST_17883_PI419772161	0.000183	14.0281	down	Grik3	NM_001081097	Mus musculus glutamate receptor, ionotropic, kainate 3 (Grik3), mRNA [NM_001081097]
CUST_13778_PI419772161	0.000210862	14.017	down	Cd63	NM_007653	Cd63 antigen
CUST_571_PI419772161	0.0073967	14.0142	down	ORF19	NM_026833	Mus musculus open reading frame 19 (ORF19), transcript variant 1, mRNA [NM_026833]
CUST_16396_PI419772161	0.000262925	14.0102	down	Sema6d	NM_172537	Mus musculus sema domain, transmembrane domain (TM), and cytoplasmic domain, (semaphorin) 6D (Sema6d), transcript variant 1, mRNA [NM_172537]
CUST_20205_PI419772161	0.000265967	13.9724	down	Hck	NM_010407	Mus musculus hemopoietic cell kinase (Hck), transcript variant 1, mRNA [NM_010407]
CUST_10153_PI419772161	0.0258817	13.9686	down	Tmem132c	NM_175432	Mus musculus transmembrane protein 132C (Tmem132c), mRNA [NM_175432]
CUST_19201_PI419772161	0.000677777	13.9629	down	Gm5634	NM_001085524	hypothetical protein LOC434726
CUST_20808_PI419772161	0.0272451	13.9586	down	Neu3	NM_016720	Mus musculus neuraminidase 3 (Neu3), mRNA [NM_016720]
CUST_18216_PI419772161	0.000165157	13.9494	down	Tcfap2c	NM_009335	Mus musculus transcription factor AP-2, gamma (Tcfap2c), transcript variant 1, mRNA [NM_009335]
CUST_6257_PI419772161	0.00935264	13.9481	down	Fhl3	NM_010213	Mus musculus four and a half LIM domains 3 (Fhl3), mRNA [NM_010213]
CUST_11055_PI419772161	0.0150876	13.9458	down	Tmem86a	NM_026436	Mus musculus transmembrane protein 86A (Tmem86a), mRNA [NM_026436]
CUST_4045_PI419772161	0.00167138	13.8942	down	Cyp2j9	NM_028979	Mus musculus cytochrome P450, family 2, subfamily j, polypeptide 9 (Cyp2j9), mRNA [NM_028979]
CUST_16095_PI419772161	0.00421061	13.891	down	Tcirg1	NM_016921	Mus musculus T-cell, immune regulator 1, ATPase, H+ transporting, lysosomal V0 protein A3 (Tcirg1), transcript variant 1, mRNA [NM_016921]
CUST_21554_PI419772161	0.000783695	13.8897	down	Wfs1	NM_011716	Mus musculus Wolfram syndrome 1 homolog (human) (Wfs1), mRNA [NM_011716]
CUST_406_PI419772161	0.0298715	13.8823	down	9930104L06Rik	NM_177573	hypothetical protein LOC194268
CUST_16662_PI419772161	0.012385	13.8777	down	Sall1	NM_021390	Mus musculus sal-like 1 (Drosophila) (Sall1), mRNA [NM_021390]
CUST_6388_PI419772161	0.0159039	13.8737	down	Dcaf13	NM_198606	Mus musculus DDB1 and CUL4 associated factor 13 (Dcaf13), mRNA [NM_198606]
CUST_4738_PI419772161	0.00274352	13.869	down	Ngfrap1	NM_009750	Mus musculus nerve growth factor receptor (TNFRSF16) associated protein 1 (Ngfrap1), transcript variant 1, mRNA [NM_009750]
CUST_986_PI419772161	0.0179084	13.8601	down	Cnpy4	NM_178612	Mus musculus canopy 4 homolog (zebrafish) (Cnpy4), mRNA [NM_178612]
CUST_4264_PI419772161	0.0171503	13.8164	down	Crlf3	NM_018776	Mus musculus cytokine receptor-like factor 3 (Crlf3), mRNA [NM_018776]
CUST_20493_PI419772161	0.0178724	13.8058	down	Rhog	NM_019566	Mus musculus ras homolog gene family, member G (Rhog), mRNA [NM_019566]
CUST_12908_PI419772161	0.000867125	13.7769	down	Irx1	NM_010573	Mus musculus Iroquois related homeobox 1 (Drosophila) (Irx1), mRNA [NM_010573]
CUST_4422_PI419772161	0.000368106	13.7708	down	Raet1b	NM_009017	retinoic acid early transcript beta
CUST_21770_PI419772161	0.018389	13.7672	down	Fam43b	NM_001081672	hypothetical protein LOC625638
CUST_21820_PI419772161	0.00020392	13.762	down	Pcgf2	NM_009545	Mus musculus polycomb group ring finger 2 (Pcgf2), transcript variant 1, mRNA [NM_009545]
CUST_13121_PI419772161	0.0104331	13.7591	down	Wsb1	NM_019653	Mus musculus WD repeat and SOCS box-containing 1 (Wsb1), transcript variant 1, mRNA [NM_019653]
CUST_9316_PI419772161	0.00259788	13.7449	down	Rpp25	NM_133982	Mus musculus ribonuclease P 25 subunit (human) (Rpp25), mRNA [NM_133982]
CUST_14964_PI419772161	0.00723752	13.732	down	Gba	NM_001077411	Mus musculus glucosidase, beta, acid (Gba), transcript variant 2, mRNA [NM_001077411]
CUST_17243_PI419772161	0.0001172	13.7175	down	Eif3f	NM_025344	Mus musculus eukaryotic translation initiation factor 3, subunit F (Eif3f), mRNA [NM_025344]
CUST_151_PI419772161	0.00379684	13.7047	down	D630039A03Rik	NM_178727	Mus musculus RIKEN cDNA D630039A03 gene (D630039A03Rik), mRNA [NM_178727]
CUST_17583_PI419772161	0.0263967	13.702	down	Psap	NM_001146120	prosaposin isoform A preproprotein
CUST_10612_PI419772161	1.32007e-06	13.683	down	Col15a1	NM_009928	Mus musculus collagen, type XV, alpha 1 (Col15a1), mRNA [NM_009928]
CUST_19722_PI419772161	0.00734071	13.6822	down	Unc5b	NM_029770	Mus musculus unc-5 homolog B (C. elegans) (Unc5b), mRNA [NM_029770]
CUST_13671_PI419772161	0.00133394	13.6557	down	Foxp4	NM_001110824	winged-helix repressor FOXP4 isoform 1
CUST_13165_PI419772161	0.000396564	13.6493	down	2700081O15Rik	NM_175381	Mus musculus RIKEN cDNA 2700081O15 gene (2700081O15Rik), mRNA [NM_175381]
CUST_16094_PI419772161	1.09852e-05	13.6423	down	Tmem38a	NM_144534	Mus musculus transmembrane protein 38A (Tmem38a), mRNA [NM_144534]
CUST_1576_PI419772161	0.0182028	13.6336	down	Prosapip1	NM_197945	Mus musculus ProSAPiP1 protein (Prosapip1), mRNA [NM_197945]
CUST_19204_PI419772161	0.00025703	13.6111	down	Gm14511	NM_001085525	hypothetical protein LOC434727
CUST_17424_PI419772161	0.00325621	13.6056	down	Accn1	NM_007384	Mus musculus amiloride-sensitive cation channel 1, neuronal (degenerin) (Accn1), transcript variant 1, mRNA [NM_007384]
CUST_17143_PI419772161	0.00668442	13.6001	down	Tnnt2	NM_001130174	troponin T2, cardiac isoform a
CUST_13779_PI419772161	0.000597287	13.5923	down	Cd63	NM_001042580	Mus musculus CD63 antigen (Cd63), transcript variant 1, mRNA [NM_001042580]
CUST_12744_PI419772161	0.000152585	13.5716	down	Aff3	NM_010678	Mus musculus AF4/FMR2 family, member 3 (Aff3), mRNA [NM_010678]
CUST_7085_PI419772161	0.00251157	13.5705	down	Prokr1	NM_021381	Mus musculus prokineticin receptor 1 (Prokr1), mRNA [NM_021381]
CUST_18464_PI419772161	0.0150059	13.5691	down	Ttl	NM_027192	Mus musculus tubulin tyrosine ligase (Ttl), mRNA [NM_027192]
CUST_17151_PI419772161	0.00277262	13.5656	down	Tnnt2	NM_001130176	troponin T2, cardiac isoform b
CUST_14914_PI419772161	0.000750287	13.564	down	Tgfb1i1	NM_009365	Mus musculus transforming growth factor beta 1 induced transcript 1 (Tgfb1i1), mRNA [NM_009365]
CUST_20358_PI419772161	0.0166146	13.5635	down	Klhdc5	NM_001081237	Mus musculus kelch domain containing 5 (Klhdc5), mRNA [NM_001081237]
CUST_4661_PI419772161	0.00704693	13.5612	down	Cnnm2	NM_033569	Mus musculus cyclin M2 (Cnnm2), transcript variant 1, mRNA [NM_033569]
CUST_13530_PI419772161	0.00115384	13.56	down	Mn1	NM_001081235	meningioma 1
CUST_170_PI419772161	0.0444602	13.5593	down	Dennd2d	NM_028110	Mus musculus DENN/MADD domain containing 2D (Dennd2d), transcript variant 1, mRNA [NM_028110]
CUST_2407_PI419772161	0.00518348	13.546	down	Gpc6	NM_001079844	Mus musculus glypican 6 (Gpc6), transcript variant 1, mRNA [NM_001079844]
CUST_15865_PI419772161	0.000687686	13.5371	down	Tk1	NM_009387	Mus musculus thymidine kinase 1 (Tk1), mRNA [NM_009387]
CUST_20394_PI419772161	0.00264797	13.5348	down	Nfib	NM_001113210	nuclear factor I/B isoform 2
CUST_17161_PI419772161	0.00629315	13.5225	down	Tnnt2	NM_001130178	troponin T2, cardiac isoform d
CUST_17545_PI419772161	0.00569771	13.5202	down	Dlx1	NM_010053	Mus musculus distal-less homeobox 1 (Dlx1), mRNA [NM_010053]
CUST_3808_PI419772161	0.014505	13.5138	down	Zfp108	NM_018791	Mus musculus zinc finger protein 108 (Zfp108), mRNA [NM_018791]
CUST_4845_PI419772161	0.00308602	13.5058	down	Hist1h2ad	NM_178188	histone cluster 1, H2ad
CUST_11767_PI419772161	0.000219545	13.4804	down	Col13a1	NM_007731	Mus musculus collagen, type XIII, alpha 1 (Col13a1), mRNA [NM_007731]
CUST_16422_PI419772161	0.00619649	13.4707	down	Dlgap4	NM_001042488	discs, large homolog-associated protein 4
CUST_2186_PI419772161	0.000559546	13.4606	down	BC011426	NM_145490	Mus musculus cDNA sequence BC011426 (BC011426), mRNA [NM_145490]
CUST_15795_PI419772161	0.00614618	13.4477	down	Gpx8	NM_027127	Mus musculus glutathione peroxidase 8 (putative) (Gpx8), mRNA [NM_027127]
CUST_3919_PI419772161	0.0059193	13.4393	down	D19Bwg1357e	NM_177474	Mus musculus DNA segment, Chr 19, Brigham & Women's Genetics 1357 expressed (D19Bwg1357e), mRNA [NM_177474]
CUST_19529_PI419772161	0.000657116	13.4354	down	Adamts5	NM_011782	Mus musculus a disintegrin-like and metallopeptidase (reprolysin type) with thrombospondin type 1 motif, 5 (aggrecanase-2) (Adamts5), mRNA [NM_011782]
CUST_14903_PI419772161	0.0211831	13.4272	down	Slc2a10	NM_130451	Mus musculus solute carrier family 2 (facilitated glucose transporter), member 10 (Slc2a10), mRNA [NM_130451]
CUST_16002_PI419772161	0.00244604	13.4143	down	Slc38a4	NM_027052	Mus musculus solute carrier family 38, member 4 (Slc38a4), mRNA [NM_027052]
CUST_21804_PI419772161	0.000475624	13.4068	down	Gdf1	NM_008107	Mus musculus growth differentiation factor 1 (Gdf1), transcript variant 2, mRNA [NM_008107]
CUST_9465_PI419772161	0.00719443	13.4031	down	Nudt10	NM_001031664	Mus musculus nudix (nucleoside diphosphate linked moiety X)-type motif 10 (Nudt10), mRNA [NM_001031664]
CUST_16732_PI419772161	0.00780161	13.3881	down	Sp9	NM_001005343	trans-acting transcription factor 9
CUST_19747_PI419772161	0.00260357	13.382	down	Cbln1	NM_019626	Mus musculus cerebellin 1 precursor protein (Cbln1), mRNA [NM_019626]
CUST_17590_PI419772161	0.01973	13.3813	down	Psap	NM_001146123	prosaposin isoform E preproprotein
CUST_14794_PI419772161	0.0204544	13.3671	down	Tpm3	NM_022314	Mus musculus tropomyosin 3, gamma (Tpm3), mRNA [NM_022314]
CUST_13941_PI419772161	0.0013924	13.357	down	Rhoq	NM_145491	Mus musculus ras homolog gene family, member Q (Rhoq), mRNA [NM_145491]
CUST_17298_PI419772161	0.0147227	13.3409	down	Tnnt2	NM_001136083	troponin T2, cardiac isoform d
CUST_933_PI419772161	0.0173064	13.3408	down	1110067D22Rik	NM_173752	Mus musculus RIKEN cDNA 1110067D22 gene (1110067D22Rik), mRNA [NM_173752]
CUST_15065_PI419772161	0.000504859	13.3289	down	Plcl2	NM_013880	Mus musculus phospholipase C-like 2 (Plcl2), mRNA [NM_013880]
CUST_20357_PI419772161	0.000477238	13.3064	down	Ets2	NM_011809	Mus musculus E26 avian leukemia oncogene 2, 3' domain (Ets2), mRNA [NM_011809]
CUST_17163_PI419772161	0.00695885	13.2969	down	Tnnt2	NM_001130179	troponin T2, cardiac isoform d
CUST_21145_PI419772161	0.0120858	13.2929	down	Krt14	NM_016958	Mus musculus keratin 14 (Krt14), mRNA [NM_016958]
CUST_18673_PI419772161	0.000304393	13.2914	down	Wfdc9	NM_001160414	WAP four-disulfide core domain 9
CUST_2760_PI419772161	0.00616971	13.2887	down	Cdc42ep2	NM_026772	Mus musculus CDC42 effector protein (Rho GTPase binding) 2 (Cdc42ep2), mRNA [NM_026772]
CUST_21169_PI419772161	0.00323481	13.2781	down	Cd44	NM_001039150	CD44 antigen isoform b
CUST_11883_PI419772161	0.000660965	13.2645	down	Npr2	NM_173788	Mus musculus natriuretic peptide receptor 2 (Npr2), mRNA [NM_173788]
CUST_9219_PI419772161	0.00121581	13.2416	down	Fam184b	NM_021416	Mus musculus family with sequence similarity 184, member B (Fam184b), mRNA [NM_021416]
CUST_7936_PI419772161	0.00790077	13.2215	down	Tsen54	NM_029557	Mus musculus tRNA splicing endonuclease 54 homolog (S. cerevisiae) (Tsen54), mRNA [NM_029557]
CUST_14630_PI419772161	0.00528589	13.2148	down	Loxl2	NM_033325	Mus musculus lysyl oxidase-like 2 (Loxl2), mRNA [NM_033325]
CUST_10461_PI419772161	0.00494387	13.2117	down	Tnfrsf25	NM_033042	Mus musculus tumor necrosis factor receptor superfamily, member 25 (Tnfrsf25), mRNA [NM_033042]
CUST_603_PI419772161	0.000145045	13.1953	down	Kif26a	NM_001097621	Mus musculus kinesin family member 26A (Kif26a), mRNA [NM_001097621]
CUST_4690_PI419772161	0.0253793	13.1938	down	Nol10	NM_001008421	Mus musculus nucleolar protein 10 (Nol10), mRNA [NM_001008421]
CUST_14244_PI419772161	0.0314456	13.1667	down	S100a8	NM_013650	Mus musculus S100 calcium binding protein A8 (calgranulin A) (S100a8), mRNA [NM_013650]
CUST_18045_PI419772161	0.00118626	13.1575	down	Col6a1	NM_009933	Mus musculus collagen, type VI, alpha 1 (Col6a1), mRNA [NM_009933]
CUST_21162_PI419772161	0.000542297	13.1435	down	Cd44	NM_009851	Mus musculus CD44 antigen (Cd44), transcript variant 1, mRNA [NM_009851]
CUST_11647_PI419772161	0.0322776	13.1404	down	Acadvl	NM_017366	Mus musculus acyl-Coenzyme A dehydrogenase, very long chain (Acadvl), nuclear gene encoding mitochondrial protein, mRNA [NM_017366]
CUST_8405_PI419772161	0.00431246	13.1373	down	2410012M07Rik	NM_028033	Mus musculus RIKEN cDNA 2410012M07 gene (2410012M07Rik), mRNA [NM_028033]
CUST_13355_PI419772161	0.00914254	13.1279	down	Car3	NM_007606	Mus musculus carbonic anhydrase 3 (Car3), mRNA [NM_007606]
CUST_16441_PI419772161	0.00310126	13.1152	down	Nek6	NM_001159631	NIMA-related kinase 6
CUST_5653_PI419772161	0.0037038	13.1133	down	Rcor2	NM_054048	Mus musculus REST corepressor 2 (Rcor2), mRNA [NM_054048]
CUST_11383_PI419772161	0.000181339	13.0871	down	Nfkbid	NM_172142	Mus musculus nuclear factor of kappa light polypeptide gene enhancer in B-cells inhibitor, delta (Nfkbid), mRNA [NM_172142]
CUST_10314_PI419772161	0.00035128	13.0808	down	Cbx2	NM_007623	Mus musculus chromobox homolog 2 (Drosophila Pc class) (Cbx2), mRNA [NM_007623]
CUST_3447_PI419772161	0.023734	13.0694	down	Pdlim7	NM_026131	Mus musculus PDZ and LIM domain 7 (Pdlim7), transcript variant c, mRNA [NM_026131]
CUST_12868_PI419772161	0.00419255	13.0681	down	Mrpl15	NM_025300	Mus musculus mitochondrial ribosomal protein L15 (Mrpl15), nuclear gene encoding mitochondrial protein, transcript variant 2, mRNA [NM_025300]
CUST_3952_PI419772161	0.000225363	13.0637	down	Fthl17	NM_031261	Mus musculus ferritin, heavy polypeptide-like 17 (Fthl17), mRNA [NM_031261]
CUST_13669_PI419772161	0.00248877	13.0625	down	Foxp4	NM_028767	Mus musculus forkhead box P4 (Foxp4), transcript variant 3, mRNA [NM_028767]
CUST_13030_PI419772161	7.9664e-05	13.0506	down	Tspan6	NM_019656	Mus musculus tetraspanin 6 (Tspan6), mRNA [NM_019656]
CUST_168_PI419772161	0.000123317	13.0161	down	Fbxl7	NM_176959	Mus musculus F-box and leucine-rich repeat protein 7 (Fbxl7), mRNA [NM_176959]
CUST_15348_PI419772161	0.0240729	13.0142	down	Hps3	NM_001146324	Mus musculus Hermansky-Pudlak syndrome 3 homolog (human) (Hps3), transcript variant 3, mRNA [NM_001146324]
CUST_8165_PI419772161	0.0140847	13.004	down	Klrd1	NM_010654	Mus musculus killer cell lectin-like receptor, subfamily D, member 1 (Klrd1), mRNA [NM_010654]
CUST_15661_PI419772161	0.00844535	13.0037	down	Actn2	NM_033268	Mus musculus actinin alpha 2 (Actn2), mRNA [NM_033268]
CUST_20842_PI419772161	0.00414861	12.9896	down	Lama4	NM_010681	Mus musculus laminin, alpha 4 (Lama4), mRNA [NM_010681]
CUST_12929_PI419772161	0.00834627	12.9689	down	Tspan4	NM_053082	Mus musculus tetraspanin 4 (Tspan4), mRNA [NM_053082]
CUST_1673_PI419772161	0.0499439	12.9667	down	Tmc6	NM_145439	Mus musculus transmembrane channel-like gene family 6 (Tmc6), transcript variant 1, mRNA [NM_145439]
CUST_16781_PI419772161	0.0101557	12.9615	down	Slc7a10	NM_017394	Mus musculus solute carrier family 7 (cationic amino acid transporter, y+ system), member 10 (Slc7a10), mRNA [NM_017394]
CUST_1251_PI419772161	0.000590809	12.9525	down	Numbl	NM_010950	numb-like
CUST_7358_PI419772161	0.00449843	12.9463	down	Stc2	NM_011491	Mus musculus stanniocalcin 2 (Stc2), mRNA [NM_011491]
CUST_11270_PI419772161	0.0139051	12.9428	down	Unk	NM_172569	Mus musculus unkempt homolog (Drosophila) (Unk), mRNA [NM_172569]
CUST_16131_PI419772161	0.000425705	12.9136	down	Folr1	NM_008034	Mus musculus folate receptor 1 (adult) (Folr1), mRNA [NM_008034]
[truncated: 2,772 more rows]
