# Supplementary material for: Long Non-Coding RNA Expression Profiling of Mouse Testis during Postnatal Development
Source: PLoS One. 2013 Oct 10;8(10):e75750. doi: 10.1371/journal.pone.0075750 (PMC3794988; doi:10.1371/journal.pone.0075750)
Supplement: Table S5 — Chromosome distribution of expressed lncRNAs. (XLS) [file pone.0075750.s008.xls]

## Sheet: Sheet1
Table S5. Chromosome distribution of expressed lncRNAs.
Chromosomes	Number of expressed lncRNAs	Number of up-regulated lncRNAs	Number of down-regulated lncRNAs	Total nunber of probes	Number ratio(expressed/total)	Number ratio(up-regulated/total)	Number ratio(down-regulated/total)
chr1	481	126	70	876	0.55	0.14	0.08
chr2	704	135	97	1300	0.54	0.1	0.07
chr3	410	103	35	750	0.55	0.13	0.05
chr4	486	102	67	870	0.56	0.12	0.08
chr5	546	144	50	877	0.62	0.16	0.06
chr6	498	127	80	915	0.54	0.14	0.09
chr7	456	110	64	888	0.51	0.12	0.07
chr8	410	101	56	706	0.58	0.14	0.08
chr9	401	114	40	760	0.53	0.15	0.05
chr10	402	118	48	701	0.57	0.17	0.07
chr11	552	97	72	996	0.55	0.1	0.07
chr12	366	98	54	617	0.59	0.16	0.09
chr13	382	97	37	659	0.58	0.15	0.06
chr14	395	114	40	671	0.59	0.17	0.06
chr15	306	76	37	539	0.57	0.14	0.07
chr16	308	78	41	543	0.57	0.14	0.08
chr17	343	74	40	605	0.57	0.12	0.07
chr18	283	64	43	491	0.58	0.13	0.09
chr19	277	60	26	500	0.55	0.12	0.05
chrX	240	17	65	435	0.55	0.04	0.15
chrY	10	7	0	15	0.67	0.45	0
chrM	9	0	0	10	0.9	0	0
Note: "chrM" represents mitochondrial genome.
