# Supplementary material for: Long Non-Coding RNA Expression Profiling of Mouse Testis during Postnatal Development
Source: PLoS One. 2013 Oct 10;8(10):e75750. doi: 10.1371/journal.pone.0075750 (PMC3794988; doi:10.1371/journal.pone.0075750)
Supplement: Table S7 — Differentially expressed lncRNAs overlapping with annotated microRNAs. (XLS) [file pone.0075750.s010.xls]

## Sheet: Sheet1
SeqID	Gene Symbol	Annotated microRNAs
AK033350		mmu-mir-130a
uc007pas	AK147321	mmu-mir-1906
AK018648		mmu-mir-1936
AK133004		mmu-mir-1956
AK054058		mmu-mir-196b
uc009kgh	AK144366	mmu-mir--202
uc007kde	AK006051	mmu-mir--212, mmu-mir-132
uc009hfb	AK080655	mmu-mir-344-2
uc009tzw	BC076616	mmu-mir--421, mmu-mir--374, mmu-mir-374c
NR_002848	6430411K18Rik	mmu-mir-433
uc009qaf	AK043361	mmu-mir-5133
NR_001592	H19	mmu-mir-675
uc007pav	Gtl2	mmu-mir-770
uc007par	Gtl2	mmu-mir-770, mmu-mir-1906
NR_003633	Meg3	mmu-mir-770, mmu-mir-1906
uc007paq	Gtl2	mmu-mir-770, mmu-mir-1906
uc007pat	Gtl2	mmu-mir-770, mmu-mir-1906
uc007nkz	AK004585	mmu-mir-1938
uc008lgr	AK140370	mmu-mir-670
uc007zsi	AK144299	mmu-mir-99a, mmu-let-7c-1, mmu-mir-125b-2
