# Supplementary material for: Long Non-Coding RNA Expression Profiling of Mouse Testis during Postnatal Development
Source: PLoS One. 2013 Oct 10;8(10):e75750. doi: 10.1371/journal.pone.0075750 (PMC3794988; doi:10.1371/journal.pone.0075750)
Supplement: Table S8 — List of lncRNAs associated protein-coding genes that enriched in transcription-related GO terms. (XLS) [file pone.0075750.s011.xls]

## Sheet: Sheet1
Seq ID	Genomic context	Regulation(LncRNA)	Regulation(mRNA)	Correlation	Chromosome	ChromosomeStrand	txStart	txEnd	Associated_gene_acc	Associated_gene_symbol	Associated_gene_full name	Gene Ontology (GO)
AK009920	intronic sense	down	down	positive	chr1	-	38611129	38613222	NM_010678	Aff3	AF4/FMR2 family, member 3	Transcription, DNA-dependent
AK084200	intergenic	up	N/A	N/A	chr15	-	96062300	96085115	NM_175251	Arid2	AT rich interactive domain 2 (ARID, RFX-like)	Positive regulation of transcription from RNA polymerase II promoter
AK039302	intronic sense	down	down	positive	chr13	+	14140980	14160778	NM_194262	Arid4b	AT rich interactive domain 4B (RBP1-like)	Transcription regulation
BC048582	intergenic	up	down	negtive	chr1	+	36389553	36390265	NM_145996	Arid5a	AT rich interactive domain 5A (MRF1-like)	Transcription regulation
AK017104	exonic antisense	up	N/A	N/A	chr4	+	63042391	63055052	NM_001045514	Akna	AT-hook transcription factor	Transcription regulation
AK019722	exonic antisense	up	N/A	N/A	chr11	-	24066876	24072824	NM_001159289	Bcl11a	B cell CLL/lymphoma 11A (zinc finger protein)	Transcription regulation
AK007234	intergenic	up	down	negtive	chr12	-	107680862	107685873	NM_001079883	Bcl11b	B cell leukemia/lymphoma 11B	RNA polymerase II core promoter proximal region sequence-specific DNA binding
AK012089	intronic sense	down	down	positive	chrX	-	11659671	11660237	NM_175044	Bcor	BCL6 interacting corepressor	Transcription, DNA-dependent
AK087211	intergenic	down	N/A	N/A	chr12	-	114193759	114196609	NM_028193	Brf1	BRF1 homolog, subunit of RNA polymerase III transcription initiation factor IIIB (S. cerevisiae)	DNA-dependent transcription, initiation;positive regulation of transcription, DNA-dependent
AK015287	intergenic	up	N/A	N/A	chr5	-	106793579	106795868	NM_001005477	Barhl2	BarH-like 2 (Drosophila)	Positive regulation of translation
AK145034	intergenic	up	N/A	N/A	chr2	-	18609149	18611941	NM_007552	Bmi1	Bmi1 polycomb ring finger oncogene	Negative regulation of transcription from RNA polymerase II promoter;Transcription, DNA-dependent
AK016552	intronic antisense	up	N/A	N/A	chr7	+	140195908	140198507	NM_009980	Ctbp2	C-terminal binding protein 2	Negative regulation of transcription, DNA-dependent;transcription, DNA-dependent
AK019828	intergenic	up	N/A	N/A	chr10	+	116039847	116040350	NM_028082	Cnot2	CCR4-NOT transcription complex, subunit 2	regulation of transcription, DNA-dependent;transcription, DNA-dependent
AK031165	exonic sense	down	down	positive	chr7	+	3596869	3601182	NM_146176	Cnot3	CCR4-NOT transcription complex, subunit 3	regulation of transcription, DNA-dependent;transcription, DNA-dependent
AK005958	intergenic	up	N/A	N/A	chr16	-	4219911	4228058	NM_001025432	Crebbp	CREB binding protein	positive regulation of transcription from RNA polymerase II promoter;transcription, DNA-dependent
AK136184	intergenic	up	down	negtive	chr10	-	16670900	16675819	NM_010828	Cited2	Cbp/p300-interacting transactivator, with Glu/Asp-rich carboxy-terminal domain, 2	positive regulation of transcription, DNA-dependent;transcription, DNA-dependent
BC051525	intergenic	up	N/A	N/A	chr4	+	120288442	120295287	NM_019563	Cited4	Cbp/p300-interacting transactivator, with Glu/Asp-rich carboxy-terminal domain, 4	positive regulation of transcription, DNA-dependent; transcription, DNA-dependent
AK036130	exonic antisense	down	N/A	N/A	chr12	+	84827084	84829972	NM_058212	Dpf3	D4, zinc and double PHD fingers, family 3	regulation of transcription, DNA-dependent; transcription, DNA-dependent
AK016899	intergenic	up	N/A	N/A	chr4	+	107460453	107462526	NM_019872	Dmrtb1	DMRT-like family B with proline-rich C-terminal, 1	regulation of transcription, DNA-dependent; transcription, DNA-dependent
AK076721	exonic antisense	up	up	positive	chr5	-	30061907	30062476	NM_001037941	Dnajb6	DnaJ (Hsp40) homolog, subfamily B, member 6	negative regulation of transcription, DNA-dependent
AK076938	intergenic	up	N/A	N/A	chr10	-	110238229	110333606	NM_178609	E2f7	E2F transcription factor 7	transcription, DNA-dependent
AK158295	bidirectional	up	N/A	N/A	chr7	+	56136669	56141978	NM_001013368	E2f8	E2F transcription factor 8	transcription, DNA-dependent
AK017046	intronic antisense	up	up	positive	chr15	+	83885637	83887021	NM_029946	Efcab6	EF-hand calcium binding domain 6	regulation of transcription, DNA-dependent; transcription, DNA-dependent
AK085973	intergenic	down	N/A	N/A	chr7	-	19926316	19927864	NM_008036	Fosb	FBJ osteosarcoma oncogene B	sequence-specific DNA binding transcription factor activity
AK136742	intergenic	down	N/A	N/A	chr17	-	34045127	34046123	NM_007829	Daxx	Fas death domain-associated protein	Negative regulation of transcription, DNA-dependent; transcription, DNA-dependent
AK016124	intergenic	up	N/A	N/A	chr6	-	23130481	23131489	NM_028462	Fezf1	Fez family zinc finger 1	positive regulation of transcription, DNA-dependent; transcription, DNA-dependent
AK006852	intergenic	up	N/A	N/A	chr2	+	9111141	9119104	NM_008091	Gata3	GATA binding protein 3	RNA polymerase II core promoter sequence-specific DNA binding
AK031341	exonic sense	down	down	positive	chr14	-	63860808	63864096	NM_008092	Gata4	GATA binding protein 4	RNA polymerase II transcription factor binding transcription factor activity
AK047045	intergenic	down	down	positive	chr18	+	10812907	10816766	NM_010258	Gata6	GATA binding protein 6	negative regulation of transcription from RNA polymerase II promoter
AK015985	intergenic	up	up	positive	chr3	-	90096222	90097905	NM_139304	Gatad2b	GATA zinc finger domain containing 2B	transcription, DNA-dependent
AK137112	intergenic	down	down	positive	chr13	-	15551818	15553128	NM_008130	Gli3	GLI-Kruppel family member GLI3	negative regulation of transcription from RNA polymerase II promoter; positive regulation of transcription from RNA polymerase II promoter
AK019761	intronic antisense	up	down	negtive	chr4	-	107269390	107269831	NM_147221	Glis1	GLIS family zinc finger 1	negative regulation of transcription from RNA polymerase II promoter; positive regulation of transcription from RNA polymerase II promoter
AK021285	bidirectional	down	down	positive	chr16	-	4592921	4594230	NM_031184	Glis2	GLIS family zinc finger 2	negative regulation of transcription from RNA polymerase II promoter
AK052617	intronic sense	down	down	positive	chr19	-	28591848	28594190	NM_175459	Glis3	GLIS family zinc finger 3	negative regulation of transcription from RNA polymerase II promoter; positive regulation of transcription from RNA polymerase II promoter
AK015643	intergenic	up	down	negtive	chr1	+	186536375	186542868	NM_008250	Hlx	H2.0-like homeobox	transcription, DNA-dependent
AK016658	intergenic	up	up	positive	chr5	+	35704201	35710326	NM_010445	Hmx1	H6 homeobox 1	Negative regulation of transcription, DNA-dependent; transcription, DNA-dependent
AK028520	exonic antisense	down	N/A	N/A	chr7	+	138532702	138536280	NM_175115	Ikzf5	IKAROS family zinc finger 5	regulation of transcription, DNA-dependent; transcription, DNA-dependent
AK020950	intergenic	down	down	positive	chr13	-	117640101	117641035	NM_021459	Isl1	ISL1 transcription factor, LIM/homeodomain	RNA polymerase II transcription coactivator activity
AK007185	intergenic	up	down	negtive	chr13	+	71625053	71750157	NM_010573	Irx1	Iroquois related homeobox 1 (Drosophila)	sequence-specific DNA binding transcription factor activity
AK016132	intergenic	up	N/A	N/A	chr13	-	73343540	73366548	NM_018885	Irx4	Iroquois related homeobox 4 (Drosophila)	regulation of transcription from RNA polymerase II promoter
AK016095	intergenic	up	down	negtive	chr4	-	94755773	94758110	NM_010591	Jun	Jun oncogene	negative regulation of transcription, DNA-dependent; positive regulation of transcription from RNA polymerase II promoter
AK016287	intergenic	up	up	positive	chr15	-	69064360	69065429	NM_010158	Khdrbs3	KH domain containing, RNA binding, signal transduction associated 3	regulation of transcription, DNA-dependent; transcription, DNA-dependent
AK086739	intergenic	up	down	negtive	chr14	+	99921763	99976121	NM_010636	Klf12	Kruppel-like factor 12	negative regulation of transcription from RNA polymerase II promoter; positive regulation of transcription from RNA polymerase II promoter
BC052788	exonic antisense	down	down	positive	chr7	+	71031248	71032531	NM_021366	Klf13	Kruppel-like factor 13	positive regulation of transcription from RNA polymerase II promoter;transcription from RNA polymerase II promoter
AK006413	intergenic	up	N/A	N/A	chr5	-	64846051	64859181	NM_008453	Klf3	Kruppel-like factor 3	regulation of transcription, DNA-dependent; transcription, DNA-dependent
AY512912	intergenic	up	N/A	N/A	chr4	+	55576136	55612168	NM_010637	Klf4	Kruppel-like factor 4	positive regulation of transcription from RNA polymerase II promoter
AK012473	intergenic	down	N/A	N/A	chr14	-	100265401	100266079	NM_009769	Klf5	Kruppel-like factor 5	positive regulation of transcription, DNA-dependent; transcription, DNA-dependent
AK006031	intergenic	up	down	negtive	chr13	-	5854754	5857338	NM_011803	Klf6	Kruppel-like factor 6	positive regulation of transcription from RNA polymerase II promoter
AK038520	intergenic	down	down	positive	chr1	-	64076036	64079501	NM_033563	Klf7	Kruppel-like factor 7	positive regulation of transcription, DNA-dependent; transcription, DNA-dependent
AK008366	intronic sense	down	down	positive	chr2	+	68804807	68805679	NM_172856	Lass6	LAG1 homolog, ceramide synthase 6	sequence-specific DNA binding transcription factor activity
AK006783	intergenic	up	down	negtive	chr6	+	112160701	112162507	NM_144799	Lmcd1	LIM and cysteine-rich domains 1	negative regulation of transcription from RNA polymerase II promoter; transcription, DNA-dependent
AK015845	intergenic	up	down	negtive	chr3	+	142693577	142703714	NM_010723	Lmo4	LIM domain only 4	positive regulation of transcription from RNA polymerase II promoter
AK018946	intergenic	up	up	positive	chr11	-	84530477	84533934	NM_008498	Lhx1	LIM homeobox protein 1	positive regulation of transcription, DNA-dependent
AK076949	intergenic	up	N/A	N/A	chr5	-	120789516	120792568	NM_008499	Lhx5	LIM homeobox protein 5	transcription, DNA-dependent
AK014037	intronic sense	down	down	positive	chr1	-	140725742	140727134	NM_001042577	Lhx9	LIM homeobox protein 9	negative regulation of transcription, DNA-dependent
AK006792	intergenic	up	down	negtive	chr9	-	63886271	63889272	NM_008542	Smad6	SMAD family member 6	transcription, DNA-dependent
AK006636	exonic antisense	up	N/A	N/A	chr2	-	119722547	119724141	NM_013720	Mga	MAX gene associated	transcription, DNA-dependent
AK015615	bidirectional	up	down	negtive	chr15	+	81021206	81023185	NM_153049	Mkl1	MKL (megakaryoblastic leukemia)/myocardin-like 1	transcription, DNA-dependent
AK131759	intergenic	up	down	negtive	chr16	-	13463728	13468848	NM_153588	Mkl2	MKL (megakaryoblastic leukemia)/myocardin-like 2	positive regulation of transcription from RNA polymerase II promoter; transcription, DNA-dependent
AK007026	exonic antisense	up	N/A	N/A	chr14	+	103745805	103759695	NM_207215	Mycbp2	MYC binding protein 2	regulation of transcription, DNA-dependent
AK005607	intergenic	up	down	negtive	chr19	-	53323265	53329688	NM_001008542	Mxi1	Max interacting protein 1	negative regulation of transcription from RNA polymerase II promoter
AK016692	intergenic	up	N/A	N/A	chr11	+	18965277	18975743	NM_010789	Meis1	Meis homeobox 1	RNA polymerase II distal enhancer sequence-specific DNA binding transcription factor activity
AB080658	intergenic	up	N/A	N/A	chr2	-	147187278	147188529	NM_010919	Nkx2-2	NK2 transcription factor related, locus 2 (Drosophila)	positive regulation of transcription from RNA polymerase II promoter; transcription, DNA-dependent
AK007038	exonic antisense	up	up	positive	chr14	-	69782855	69789900	NM_010920	Nkx2-6	NK2 transcription factor related, locus 6 (Drosophila)	transcription, DNA-dependent
AK019616	intergenic	up	up	positive	chr5	-	101461569	101462271	NM_144955	Nkx6-1	NK6 homeobox 1	transcription, DNA-dependent
AK032615	exonic sense	down	down	positive	chr1	-	52517762	52520534	NM_008667	Nab1	Ngfi-A binding protein 1	negative regulation of transcription, DNA-dependent; transcription, DNA-dependent
BC023886	exonic antisense	up	down	negtive	chr2	+	26301474	26313515	NM_008714	Notch1	notch 1	negative regulation of transcription from RNA polymerase II promoter
AK007900	bidirectional	up	up	positive	chr19	+	5561051	5561679	NM_019935	Ovol1	OVO homolog-like 1 (Drosophila)	RNA polymerase II core promoter proximal region sequence-specific DNA binding transcription factor activity involved in negative regulation of transcription
AK053153	exonic antisense	down	up	negtive	chr4	+	83109195	83111697	NM_133948	Psip1	PC4 and SFRS1 interacting protein 1	Transcription regulation
AK019103	intergenic	down	down	positive	chr3	-	41326125	41332396	NM_001130184	Phf17	PHD finger protein 17	Transcription regulation
AK085172	exonic sense	down	down	positive	chr2	+	156096817	156099086	NM_172674	Phf20	PHD finger protein 20	Transcription regulation
AK039132	intergenic	down	N/A	N/A	chr2	+	91898875	91902320	NM_001109690	Phf21a	PHD finger protein 21A	transcription, DNA-dependent
AK040512	exonic antisense	up	N/A	N/A	chr1	+	167802183	167805411	NM_011137	Pou2f1	POU domain, class 2, transcription factor 1	RNA polymerase II transcription coactivator activity
AK080501	intergenic	up	up	positive	chr7	-	25872370	25873561	NM_011138	Pou2f2	POU domain, class 2, transcription factor 2	positive regulation of transcription, DNA-dependent
AK018866	intergenic	up	down	negtive	chr4	-	124127481	124128531	NM_011141	Pou3f1	POU domain, class 3, transcription factor 1	RNA polymerase II transcription coactivator activity
AK015419	intergenic	up	N/A	N/A	chr1	-	41224404	41238097	NM_008900	Pou3f3	POU domain, class 3, transcription factor 3	positive regulation of transcription from RNA polymerase II promoter
AK006476	intergenic	up	N/A	n	chr14	+	104298710	104299169	NM_011143	Pou4f1	POU domain, class 4, transcription factor 1	RNA polymerase II core promoter proximal region sequence-specific DNA binding transcription factor activity involved in positive regulation of transcription
AK077955	intronic sense	down	down	positive	chr11	+	3201788	3204468	NM_019574	Patz1	POZ (BTB) and AT hook containing zinc finger 1	negative regulation of transcription, DNA-dependent; positive regulation of transcription, DNA-dependent
AK015266	intergenic	up	down	negtive	chr10	-	44450574	44458706	NM_007548	Prdm1	PR domain containing 1, with ZNF domain	regulation of transcription, DNA-dependent
AK083203	bidirectional	down	down	positive	chr4	+	154011684	154018825	NM_027504	Prdm16	PR domain containing 16	positive regulation of transcription, DNA-dependent
AK007008	intergenic	up	N/A	N/A	chr4	-	141811577	141811991	NM_001081355	Prdm2	PR domain containing 2	regulation of transcription, DNA-dependent
AK053030	intronic sense	down	up	negtive	chr9	-	36950568	36953400	NM_001029838	Pknox2	Pbx/knotted 1 homeobox 2	regulation of transcription from RNA polymerase II promoter
AK015674	intergenic	up	up	positive	chr9	-	68318708	68368007	NM_013646	Rora	RAR-related orphan receptor alpha	positive regulation of transcription from RNA polymerase II promoter
AK161112	bidirectional	down	N/A	N/A	chr1	-	6199948	6204661	NM_009826	Rb1cc1	RB1-inducible coiled-coil 1 (Rb1cc1)	regulation of transcription, DNA-dependent
AK219183	intergenic	up	up	positive	chr1	+	193922736	193923016	NM_144814	Rcor3	REST corepressor 3	regulation of transcription, DNA-dependent; transcription, DNA-dependent
AK076358	exonic antisense	up	N/A	N/A	chr7	+	28712742	28716022	NM_028538	1700049G17Rik	RIKEN cDNA 1700049G17 gene	nucleic acid binding
AK029496	exonic antisense	up	down	negtive	chr16	+	91013965	91016988	NM_026110	Gcfc1	GC-rich sequence DNA-binding factor 1	sequence-specific DNA binding transcription factor activity
AK008245	intergenic	down	down	positive	chr12	-	85238417	85239170	NM_023633	2410016O06Rik	RIKEN cDNA 2410016O06 gene	negative regulation of transcription, DNA-dependent
AK049261	exonic sense	down	N/A	N/A	chr2	-	177803180	177813160	NM_001162922	Zfp931	zinc finger protein 931	regulation of transcription, DNA-dependent
AK043991	intergenic	up	N/A	N/A	chr12	+	50491645	50508140	NM_008241	Foxg1	forkhead box G1	negative regulation of transcription from RNA polymerase II promoter; positive regulation of transcription from RNA polymerase II promoter
AK015297	exonic sense	up	N/A	N/A	chr17	+	22099552	22208135	NM_001025373	Zfp943	zinc finger protein 943	regulation of transcription, DNA-dependent
AK078603	intergenic	up	N/A	N/A	chr9	-	20347813	20349873	NM_001082485	Zfp266	zinc finger protein 266	regulation of transcription, DNA-dependent
AK088428	exonic antisense	up	down	negtive	chr2	+	38921134	38921886	NM_178778	Scai	suppressor of cancer cell invasion	regulation of transcription, DNA-dependent; transcription, DNA-dependent
AK016932	intergenic	up	N/A	N/A	chr10	-	81778119	81779304	NM_001105557	Zfp938	zinc finger protein 938	regulation of transcription, DNA-dependent
AK005833	intergenic	up	N/A	N/A	chr14	-	25425925	25436533	NM_183208	Zmiz1	zinc finger, MIZ-type containing 1	regulation of transcription, DNA-dependent; transcription, DNA-dependent
AK020850	bidirectional	up	down	negtive	chr2	+	156006312	156006849	NM_133242	Rbm39	RNA binding motif protein 39	regulation of transcription, DNA-dependent; transcription, DNA-dependent
AK007154	exonic antisense	up	N/A	N/A	chr15	+	76914827	76926744	NM_053104	Rbfox2	RNA binding protein, fox-1 homolog (C. elegans) 2	negative regulation of transcription, DNA-dependent
AK037895	exonic sense	down	down	positive	chr3	-	51352604	51355242	NM_080793	Setd7	SET domain containing (lysine methyltransferase) 7	regulation of transcription, DNA-dependent; transcription, DNA-dependent
BC049745	intergenic	up	N/A	N/A	chr3	-	95190379	95206763	NM_001163642	Setdb1	SET domain, bifurcated 1	DNA binding
AK019859	intergenic	up	up	positive	chr8	+	12502898	12505340	NM_009233	Sox1	SRY-box containing gene 1	core promoter sequence-specific DNA binding
AK006151	intergenic	up	N/A	N/A	chr12	-	27256972	27287174	NM_009234	Sox11	SRY-box containing gene 11	negative regulation of transcription from RNA polymerase II promoter; negative regulation of transcription regulatory region DNA binding
AK016008	intergenic	up	up	positive	chr9	-	100073419	100074565	NM_011440	Sox14	SRY-box containing gene 14	negative regulation of transcription from RNA polymerase II promoter;transcription, DNA-dependent
AK020728	intergenic	down	N/A	N/A	chr13	+	29108161	29120666	NM_009238	Sox4	SRY-box containing gene 4	positive regulation of translation
AK031826	intergenic	up	down	negtive	chr3	+	34564164	34576917	NM_011443	Sox2	SRY-box containing gene 2	negative regulation of transcription from RNA polymerase II promoter;positive regulation of transcription from RNA polymerase II promoter
AY512909	intergenic	down	down	positive	chrX	+	57736773	58061168	NM_009237	Sox3	SRY-box containing gene 3	DNA binding
AK160417	exonic antisense	up	up	positive	chr6	+	143970465	143972174	NM_001113559	Sox5	SRY-box containing gene 5	negative regulation of transcription, DNA-dependent; positive regulation of transcription from RNA polymerase II promoter
AK005637	intergenic	up	down	negtive	chr7	-	123225293	123232697	NM_001025560	Sox6	SRY-box containing gene 6	negative regulation of transcription from RNA polymerase II promoter; positive regulation of transcription from RNA polymerase II promoter
BC006965	intergenic	down	down	positive	chr11	-	112548956	112572655	NM_011448	Sox9	SRY-box containing gene 9	negative regulation of transcription, DNA-dependent
AK076909	intronic antisense	up	N/A	N/A	chr19	-	26695241	26697900	NM_026003	Smarca2	SWI/SNF related, matrix associated, actin dependent regulator of chromatin, subfamily a, member 2	positive regulation of transcription from RNA polymerase II promoter
AK048140	exonic antisense	down	N/A	N/A	chr10	+	75383956	75385286	NM_011418	Smarcb1	SWI/SNF related, matrix associated, actin dependent regulator of chromatin, subfamily b, member 1	regulation of transcription, DNA-dependent;transcription, DNA-dependent
AK163775	intronic sense	down	N/A	N/A	chr10	+	127912120	127914536	NM_198160	Smarcc2	SWI/SNF related, matrix associated, actin dependent regulator of chromatin, subfamily c, member 2	negative regulation of transcription, DNA-dependent;positive regulation of transcription, DNA-dependent
NR_003953	intergenic	up	down	negtive	chr5	+	24151270	24154678	NM_025891	Smarcd3	SWI/SNF related, matrix associated, actin dependent regulator of chromatin, subfamily d, member 3	positive regulation of transcription, DNA-dependent; transcription, DNA-dependent
AK018913	exonic antisense	up	N/A	N/A	chr14	-	31583866	31591190	NM_019460	Sfmbt1	Scm-like with four mbt domains 1	regulation of transcription, DNA-dependent
AK076808	intergenic	up	up	positive	chr1	+	166891051	166892955	NM_032005	Tbx19	T-box 19	positive regulation of transcription from RNA polymerase II promoter; transcription, DNA-dependent
AK015127	intergenic	up	down	negtive	chr5	+	119402347	119411270	NM_198052	Tbx3	T-box 3	negative regulation of transcription, DNA-dependent; positive regulation of transcription, DNA-dependent
AK006202	intergenic	up	N/A	N/A	chr5	-	120255337	120257878	NM_011537	Tbx5	T-box 5	positive regulation of transcription from RNA polymerase II promoter; transcription, DNA-dependent
BC048519	intergenic	up	N/A	N/A	chr15	-	54812887	54818418	NM_001081288	Taf2	TAF2 RNA polymerase II, TATA box binding protein (TBP)-associated factor	transcription factor TFIID complex
AK033633	exonic antisense	up	N/A	N/A	chr19	-	47140774	47142876	NM_177342	Taf5	TAF5 RNA polymerase II, TATA box binding protein (TBP)-associated factor	regulation of transcription, DNA-dependent; transcription, DNA-dependent
AK132630	intergenic	down	N/A	N/A	chr12	+	22811250	22888976	NM_020614	Taf1b	TATA box binding protein (Tbp)-associated factor, RNA polymerase I, B	RNA polymerase I transcription factor complex;
AK048761	intronic sense	down	N/A	N/A	chr7	+	119953226	119956349	NM_009346	Tead1	TEA domain family member 1	positive regulation of transcription from RNA polymerase II promoter
AK039686	intergenic	up	N/A	N/A	chr6	-	128137835	128150641	NM_011567	Tead4	TEA domain family member 4	positive regulation of transcription from RNA polymerase II promoter
AK011460	intergenic	down	down	positive	chr17	+	24665195	24665688	NM_153792	Traf7	TNF receptor-associated factor 7	regulation of transcription, DNA-dependent; transcription, DNA-dependent
AK017083	intergenic	up	up	positive	chr3	-	57945628	57967729	NM_001081229	Tsc22d2	TSC22 domain family, member 2	sequence-specific DNA binding transcription factor activity
AK030494	intronic sense	down	down	positive	chrX	-	137121841	137123985	NM_010286	Tsc22d3	TSC22 domain family, member 3	negative regulation of transcription from RNA polymerase II promoter
AK013706	intergenic	down	down	positive	chrX	-	148749758	148750260	NM_029836	Tspyl2	TSPY-like 2	regulation of transcription, DNA-dependent; transcription, DNA-dependent
AK019708	intergenic	up	N/A	N/A	chr10	-	116626903	116627323	NM_026570	Yeats4	YEATS domain containing 4	regulation of transcription, DNA-dependent; transcription, DNA-dependent
AK165766	exonic sense	down	N/A	N/A	chr19	-	57191265	57193423	NM_001103178	Ablim1	actin-binding LIM protein 1	positive regulation of transcription from RNA polymerase II promoter
AK017951	intronic sense	down	down	positive	chr15	-	102438048	102439215	NM_146065	Atf7	activating transcription factor 7	transcription, DNA-dependent
AK048598	intergenic	down	down	positive	chr13	-	23519985	23522832	NM_013924	Abt1	activator of basal transcription 1	regulation of transcription from RNA polymerase II promoter
AK015101	intergenic	up	up	positive	chr5	-	113749473	113750726	NM_001012726	Aym1	activator of yeast meiotic promoters 1	positive regulation of transcription from RNA polymerase II promoter
8430427H17Rik	intergenic	up	down	negtive	chr2	-	153285481	153318253	NM_001039939	Asxl1	additional sex combs like 1	negative regulation of transcription from RNA polymerase II promoter; positive regulation of transcription from RNA polymerase II promoter
AK082779	exonic sense	down	down	positive	chrX	-	103046775	103047406	NM_009530	Atrx	alpha thalassemia/mental retardation syndrome X-linked homolog (human)	DNA binding
AK087769	intergenic	down	N/A	N/A	chrX	+	95344107	95344738	NM_013476	Ar	androgen receptor	positive regulation of transcription from RNA polymerase III promoter
BC049745	intergenic	up	down	negtive	chr3	-	95190379	95206763	NM_001037737	Arnt	aryl hydrocarbon receptor nuclear translocator	positive regulation of transcription from RNA polymerase II promoter; transcription, DNA-dependent
BC042407	intergenic	up	N/A	N/A	chr7	+	120152627	120154405	NM_007489	Arntl	aryl hydrocarbon receptor nuclear translocator-like	RNA polymerase II transcription factor binding transcription factor activity involved in positive regulation of transcription
AK015398	intergenic	up	N/A	N/A	chr6	-	146794797	146795725	NM_172309	Arntl2	aryl hydrocarbon receptor nuclear translocator-like 2	negative regulation of transcription from RNA polymerase II promoter
AK086288	intergenic	up	down	negtive	chr12	+	36287215	36379354	NM_013464	Ahr	aryl-hydrocarbon receptor	negative regulation of transcription from RNA polymerase II promoter
AK015450	intronic antisense	up	down	negtive	chr13	+	46031408	46032273	NM_009124	Atxn1	ataxin 1	positive regulation of transcription from RNA polymerase II promoter
uc009ers	intergenic	down	N/A	N/A	chr6	+	145768009	145769599	NM_024469	Bhlhe41	basic helix-loop-helix family, member e41	negative regulation of transcription by competitive promoter binding
AK031039	exonic sense	down	down	positive	chr4	-	84318072	84320977	NM_172870	Bnc2	basonuclin 2	Transcription regulation
AK076728	intergenic	up	N/A	N/A	chr16	+	49955942	49959025	NM_027444	Bbx	bobby sox homolog (Drosophila)	regulation of transcription, DNA-dependent
AK006845	intergenic	up	down	negtive	chr2	+	172688060	172688623	NM_007557	Bmp7	bone morphogenetic protein 7	negative regulation of transcription, DNA-dependent;positive regulation of transcription from RNA polymerase II promoter
AK039132	intergenic	down	N/A	N/A	chr2	+	91898875	91902320	NM_011957	Creb3l1	cAMP responsive element binding protein 3-like 1	RNA polymerase II core promoter proximal region sequence-specific DNA binding transcription factor activity involved in positive regulation of transcription
BC006792	intergenic	down	N/A	n/A	chr6	-	37277254	37279696	NM_178661	Creb3l2	cAMP responsive element binding protein 3-like 2	positive regulation of transcription, DNA-dependent
AK043982	intergenic	up	down	negtive	chr15	+	102627925	102649975	NM_026192	Calcoco1	calcium binding and coiled coil domain 1	positive regulation of transcription from RNA polymerase II promoter
AK015242	intronic antisense	up	down	negtive	chr4	+	150931465	150932630	NM_001081557	Camta1	calmodulin binding transcription activator 1	regulation of transcription, DNA-dependent
AK019838	intergenic	up	down	negtive	chr9	-	120833572	120839920	NM_007614	Ctnnb1	catenin (cadherin associated protein), beta 1 (Ctnnb1)	negative regulation of transcription from RNA polymerase II promoter; positive regulation of transcription from RNA polymerase II promoter
AK015252	intergenic	up	up	positive	chr15	+	30968882	30973086	NM_008729	Ctnnd2	catenin (cadherin associated protein), delta 2 (Ctnnd2)	regulation of transcription, DNA-dependent; transcription, DNA-dependent
BC106196	exonic antisense	down	down	positive	chr4	-	148938630	148941906	NM_023465	Ctnnbip1	catenin beta interacting protein 1	negative regulation of transcription from RNA polymerase II promoter
AK019889	intergenic	up	down	negtive	chr2	-	72622737	72651774	NM_025866	Cdca7	cell division cycle associated 7	regulation of transcription, DNA-dependent
AK149260	intergenic	down	down	positive	chr11	-	118966445	118972739	NM_007625	Cbx4	chromobox 4	negative regulation of transcription from RNA polymerase II promoter
AK048353	intergenic	down	down	positive	chr14	-	52874069	52877398	NM_201637	Chd8	chromodomain helicase DNA binding protein 8	positive regulation of transcription from RNA polymerase II promoter; transcription, DNA-dependent;positive regulation of transcription from RNA polymerase III promoter
AK142189	intronic antisense	up	N/A	N/A	chr8	-	93430430	93432315	NM_177224	Chd9	chromodomain helicase DNA binding protein 9	regulation of transcription, DNA-dependent
AK015940	intergenic	up	down	negtive	chr13	-	35259014	35259673	NM_009881	Cdyl	chromodomain protein, Y chromosome-like	regulation of transcription, DNA-dependent
AK020571	exonic antisense	down	up	negtive	chr7	-	133792056	133793086	NM_029339	Ccdc101	coiled-coil domain containing 101	regulation of transcription, DNA-dependent
AK015773	intergenic	up	N/A	N/A	chr10	+	118850499	118863920	NM_027994	Cand1	cullin associated and neddylation disassociated 1	positive regulation of transcription, DNA-dependent
AK080123	intronic antisense	down	N/A	N/A	chr5	+	9155732	9158045	NM_011806	Dmtf1	cyclin D binding myb-like transcription factor 1	regulation of transcription, DNA-dependent
AK006130	exonic antisense	up	down	negtive	chr9	+	119892263	119893909	NM_153287	Csrnp1	cysteine-serine-rich nuclear protein 1	positive regulation of transcription from RNA polymerase II promoter
AK013501	intergenic	up	up	positive	chr6	-	6809854	6810384	NM_010057	Dlx6	distal-less homeobox 6	transcription regulatory region sequence-specific DNA binding
AK019375	intergenic	up	N/A	N/A	chr4	-	109649351	109650096	NM_172296	Dmrta2	doublesex and mab-3 related transcription factor like family A2	regulation of transcription, DNA-dependent
AK037105	intronic sense	down	N/A	N/A	chrX	+	81276053	81278717	NM_007868	Dmd	dystrophin, muscular dystrophy	regulation of transcription, DNA-dependent
AK012964	exonic antisense	down	down	positive	chr11	-	44433208	44434151	NM_007897	Ebf1	early B cell factor 1	positive regulation of transcription, DNA-dependent; transcription, DNA-dependent
AK015336	intronic antisense	up	N/A	N/A	chr14	-	67950878	68016579	NM_010095	Ebf2	early B cell factor 2	positive regulation of transcription, DNA-dependent; transcription, DNA-dependent
AK087769	intergenic	down	down	positive	chrX	+	95344107	95344738	NM_001161433	Eda2r	ectodysplasin A2 receptor	positive regulation of NF-kappaB transcription factor activity
AK006620	bidirectional	up	N/A	N/A	chr13	-	75837609	75844620	NM_138953	Ell2	elongation factor RNA polymerase II 2	scription elongation from RNA polymerase II promoter;regulation of transcription, DNA-dependent
AK157435	intergenic	up	N/A	N/A	chr7	+	97177669	97197579	NM_021876	Eed	embryonic ectoderm development	regulation of transcription, DNA-dependent
AK012078	intergenic	up	N/A	N/A	chr9	-	118311582	118312420	NM_010136	Eomes	eomesodermin homolog (Xenopus laevis)	positive regulation of transcription from RNA polymerase II promoter
AK019057	exonic antisense	up	N/A	N/A	chr5	-	91480896	91503799	NM_007950	Ereg	epiregulin	negative regulation of transcription, DNA-dependent
AK033270	exonic sense	down	N/A	N/A	chr10	-	5674656	5734545	NM_007956	Esr1	estrogen receptor 1 (alpha)	negative regulation of sequence-specific DNA binding transcription factor activity; regulation of transcription from RNA polymerase II promoter
AK047643	intronic sense	down	down	positive	chr12	+	39573237	39576076	NM_007960	Etv1	ets variant gene 1	positive regulation of transcription, DNA-dependent
AK032904	intronic sense	down	down	positive	chr6	+	134137563	134141228	NM_007961	Etv6	ets variant gene 6	transcription, DNA-dependent
AK005792	intergenic	up	N/A	N/A	chr6	-	81850457	81860794	NM_177884	AW146020	expressed sequence AW146020	transcription, DNA-dependent
AK017913	exonic sense	down	N/A	N/A	chr4	+	132195016	132196185	NM_211357	Eya3	eyes absent 3 homolog (Drosophila)	regulation of transcription, DNA-dependent;transcription, DNA-dependent
AK005657	intergenic	up	up	positive	chr13	+	119344960	119377511	NM_008002	Fgf10	fibroblast growth factor 10	positive regulation of transcription from RNA polymerase II promoter
AK048089	intergenic	down	N/A	N/A	chr4	+	114581861	114593723	NM_008593	Foxd2	forkhead box D2	negative regulation of transcription from RNA polymerase II promoter
AK048089	intergenic	down	N/A	N/A	chr4	+	114581861	114593723	NM_015758	Foxe3	forkhead box E3	negative regulation of transcription from RNA polymerase II promoter; positive regulation of transcription from RNA polymerase II promoter
AK004221	intergenic	down	down	positive	chr8	-	123582702	123584313	NM_010426	Foxf1	forkhead box F1	negative regulation of transcription from RNA polymerase II promoter; positive regulation of transcription from RNA polymerase II promoter
AK016091	intergenic	up	N/A	N/A	chr13	-	31659265	31674382	NM_010225	Foxf2	forkhead box F2	negative regulation of transcription from RNA polymerase II promoter; positive regulation of transcription from RNA polymerase II promoter
AK019737	intergenic	up	N/A	N/A	chr7	+	142588017	142591227	NM_183193	Foxi2	forkhead box I2	negative regulation of transcription from RNA polymerase II promoter
AK007204	intergenic	up	down	negtive	chr17	-	88695409	88704676	NM_180974	Foxn2	forkhead box N2	negative regulation of transcription from RNA polymerase II promoter
AK012244	intronic sense	down	down	positive	chr12	-	100598080	100600238	NM_183186	Foxn3	forkhead box N3	negative regulation of transcription from RNA polymerase II promoter
AK037318	intronic sense	down	N/A	N/A	chr6	-	99285729	99289118	NM_053202	Foxp1	forkhead box P1	negative regulation of transcription from RNA polymerase II promoter; positive regulation of transcription from RNA polymerase II promoter
AK035449	intronic sense	up	down	negtive	chr6	+	15045412	15046836	NM_053242	Foxp2	forkhead box P2	negative regulation of transcription from RNA polymerase II promoter
AK083529	intronic sense	down	down	positive	chr17	-	48038175	48041244	NM_001110824	Foxp4	forkhead box P4	negative regulation of transcription from RNA polymerase II promoter
AK015040	intergenic	up	down	negtive	chr13	-	31305278	31332955	NM_008239	Foxq1	forkhead box Q1	negative regulation of transcription from RNA polymerase II promoter; positive regulation of transcription from RNA polymerase II promoter
AK035460	intergenic	down	down	positive	chrX	+	149472171	149507458	NM_001034894	Foxr2	forkhead box R2	negative regulation of transcription from RNA polymerase II promoter;
AK079777	intergenic	down	N/A	N/A	chr7	+	135126592	135128401	NM_139149	Fus	fusion, derived from t(12;16) malignant liposarcoma (human)	DNA binding
AK018937	bidirectional	up	up	positive	chr8	-	34841009	34842286	NM_026584	Gtf2e2	general transcription factor II E, polypeptide 2 (beta subunit)	transcription initiation from RNA polymerase II promoter
AK076389	exonic antisense	up	N/A	N/A	chr2	+	25146739	25154448	NM_008169	Grin1	glutamate receptor, ionotropic, NMDA1 (zeta 1)	positive regulation of transcription from RNA polymerase II promoter
AK005410	exonic antisense	down	N/A	N/A	chr15	-	37161675	37162896	NM_026496	Grhl2	grainyhead-like 2 (Drosophila)	transcription, DNA-dependent
AK006510	intergenic	up	down	negtive	chr4	+	135182685	135185353	NM_001013756	Grhl3	grainyhead-like 3 (Drosophila)	positive regulation of transcription from RNA polymerase II promoter
NR_026924	intergenic	up	down	negtive	chr1	-	93301456	93302606	NM_019479	Hes6	hairy and enhancer of split 6 (Drosophila)	regulation of transcription from RNA polymerase II promoter
AK030060	intergenic	up	N/A	N/A	chr3	+	8743681	8746824	NM_010423	Hey1	hairy/enhancer-of-split related with YRPW motif 1	negative regulation of transcription regulatory region DNA binding
AK018981	intergenic	up	down	negtive	chr10	+	56224306	56225093	NM_008297	Hsf2	heat shock factor 2	transcription, DNA-dependent
AK005643	intergenic	up	up	positive	chr1	+	56075821	56077047	NM_027661	Hsfy2	heat shock transcription factor, Y linked 2	sequence-specific DNA binding transcription factor activity
uc008osm	exonic sense	down	down	positive	chr3	+	19958290	20018362	NM_144959	Hltf	helicase-like transcription factor	regulation of transcription from RNA polymerase II promoter;transcription, DNA-dependent
AK018976	intergenic	up	down	negtive	chr19	+	37539743	37546317	NM_008245	Hhex	hematopoietically expressed homeobox	negative regulation of transcription from RNA polymerase II promoter; positive regulation of transcription from RNA polymerase II promoter
AK013488	intronic sense	down	down	positive	chr11	-	90217875	90219144	NM_172563	Hlf	hepatic leukemia factor	transcription, DNA-dependent
AK015974	intergenic	up	N/A	N/A	chr5	-	100376332	100377245	NM_001077265	Hnrnpd	heterogeneous nuclear ribonucleoprotein D	regulation of transcription, DNA-dependent
uc007niz	exonic sense	up	down	negtive	chr12	-	34780741	35601767	NM_024124	Hdac9	histone deacetylase 9	negative regulation of transcription from RNA polymerase II promoter; transcription, DNA-dependent
AK054058	intergenic	down	down	positive	chr6	-	52178277	52180531	NM_001122950	Hoxa10	homeobox A10	transcription, DNA-dependent
AK054058	intergenic	down	up	negtive	chr6	-	52178277	52180531	NM_010456	Hoxa9	homeobox A9	transcription, DNA-dependent
AK078606	intergenic	down	down	positive	chr11	+	96064767	96066699	NM_008267	Hoxb13	homeobox B13	transcription, DNA-dependent
AK002860	intergenic	up	down	negtive	chr11	-	96152349	96168224	NM_010459	Hoxb4	homeobox B4	negative regulation of transcription from RNA polymerase II promoter
AK002860	intergenic	up	down	negtive	chr11	-	96152349	96168224	NM_010460	Hoxb7	homeobox B7	transcription, DNA-dependent
AK078606	intergenic	down	down	positive	chr11	+	96064767	96066699	NM_008270	Hoxb9	homeobox B9	transcription, DNA-dependent
AK035706	intergenic	up	N/A	N/A	chr15	-	102774492	102778161	NM_001024842	Hoxc11	homeobox C11	transcription, DNA-dependent
AK035706	intergenic	up	up	positive	chr15	-	102774492	102778161	NM_010463	Hoxc12	homeobox C12	transcription, DNA-dependent
AK043982	intergenic	up	down	negtive	chr15	+	102627925	102649975	NM_010464	Hoxc13	homeobox C13	transcription, DNA-dependent
AK052984	intergenic	up	down	negtive	chr15	-	102953500	102977259	NM_013553	Hoxc4	homeobox C4	transcription, DNA-dependent
AK144266	intergenic	up	down	negtive	chr2	+	74590740	74591797	NM_010467	Hoxd1	homeobox D1	sequence-specific DNA binding transcription factor activity
AK144266	intergenic	up	N/A	N/A	chr2	+	74590740	74591797	NM_010468	Hoxd3	homeobox D3	transcription, DNA-dependent
AK006850	intergenic	up	down	negtive	chr5	-	38361195	38374840	NM_010835	Msx1	homeobox, msh-like 1	negative regulation of transcription from RNA polymerase II promoter; positive regulation of transcription from RNA polymerase II promoter
AK016162	exonic antisense	up	N/A	N/A	chr3	+	103575895	103593325	NM_010432	Hipk1	homeodomain interacting protein kinase 1	negative regulation of transcription from RNA polymerase II promoter;transcription, DNA-dependent
AK076703	exonic antisense	up	down	negtive	chr6	+	38670880	38730261	NM_001136065	Hipk2	homeodomain interacting protein kinase 2	negative regulation of transcription from RNA polymerase II promoter;positive regulation of transcription from RNA polymerase II promoter
AK015665	intergenic	up	N/A	N/A	chr2	+	104399340	104411586	NM_010434	Hipk3	homeodomain interacting protein kinase 3	negative regulation of transcription from RNA polymerase II promoter
AK033584	intronic sense	down	N/A	N/A	chr10	+	13692241	13695040	NM_010437	Hivep2	human immunodeficiency virus type I enhancer binding protein 2	transcription, DNA-dependent
AK038070	intergenic	down	N/A	N/A	chr4	+	119808076	119810647	NM_010657	Hivep3	human immunodeficiency virus type I enhancer binding protein 3	positive regulation of transcription, DNA-dependent
AK090292	intergenic	down	down	positive	chr17	+	21653676	21667959	NM_013843	Zfp53	zinc finger protein 53	regulation of transcription, DNA-dependent
AK090292	intergenic	down	down	positive	chr17	+	21653676	21667959	NM_144515	Zfp52	zinc finger protein 52	regulation of transcription, DNA-dependent
AK048798	exonic antisense	up	down	negtive	chr12	-	75027467	75050772	NM_010431	Hif1a	hypoxia inducible factor 1, alpha subunit	regulation of transcription from RNA polymerase II promoter in response to oxidative stress
AK006563	intergenic	up	N/A	N/A	chr19	-	3153210	3197714	NM_009212	Ighmbp2	immunoglobulin mu binding protein 2	negative regulation of transcription from RNA polymerase II promoter;transcription, DNA-dependent
AK035610	intergenic	down	down	positive	chr13	+	16120652	16123187	NM_008380	Inhba	inhibin beta-A	negative regulation of transcription from RNA polymerase II promoter
AK037391	intergenic	down	down	positive	chr2	+	152553443	152556535	NM_010495	Id1	inhibitor of DNA binding 1	negative regulation of transcription from RNA polymerase II promoter
AK015551	intergenic	up	up	positive	chr13	+	47762918	47763761	NM_031166	Id4	inhibitor of DNA binding 4	negative regulation of transcription from RNA polymerase II promoter;positive regulation of transcription from RNA polymerase II promoter
AK040992	intergenic	up	down	negtive	chr6	-	21802980	21808178	NM_023626	Ing3	inhibitor of growth family, member 3	regulation of transcription, DNA-dependent
AK082420	intronic sense	down	N/A	N/A	chr4	-	56777214	56779425	NM_026079	Ikbkap	inhibitor of kappa light polypeptide enhancer in B cells, kinase complex-associated protein	regulation of transcription from RNA polymerase II promoter
uc009ldv	exonic sense	down	N/A	N/A	chr8	-	23812926	23817035	NM_010546	Ikbkb	inhibitor of kappaB kinase beta	positive regulation of NF-kappaB transcription factor activity
Aldoart2	intergenic	up	N/A	N/A	chr12	+	56666121	56667696	NM_020287	Insm2	insulinoma-associated 2	negative regulation of transcription, DNA-dependent
AK007736	intergenic	down	down	positive	chr10	-	118292660	118293990	NM_008337	Ifng	interferon gamma	positive regulation of transcription from RNA polymerase II promoter
AK138811	intergenic	down	down	positive	chr11	-	53598990	53672758	NM_001159396	Irf1	interferon regulatory factor 1	positive regulation of transcription from RNA polymerase II promoter
AK050834	exonic antisense	down	N/A	N/A	chr8	+	129090869	129114888	NM_001164598	Irf2bp2	interferon regulatory factor 2 binding protein 2	regulation of transcription, DNA-dependent
AK004221	intergenic	down	N/A	N/A	chr8	-	123582702	123584313	NM_008320	Irf8	interferon regulatory factor 8	positive regulation of transcription, DNA-dependent
AK007196	intergenic	up	up	positive	chr1	+	20704357	20704824	NM_010552	Il17a	interleukin 17A	positive regulation of transcription from RNA polymerase II promoter
AK006870	intergenic	up	up	positive	chr9	+	82153899	82157092	NM_022986	Irak1bp1	interleukin-1 receptor-associated kinase 1 binding protein 1	regulation of transcription, DNA-dependent
AK006003	intergenic	up	down	negtive	chr6	-	113581642	113583138	NM_172161	Irak2	interleukin-1 receptor-associated kinase 2	negative regulation of NF-kappaB transcription factor activity; positive regulation of NF-kappaB transcription factor activity
AK006389	intergenic	up	N/A	N/A	chr16	-	49210753	49255885	NM_028680	Ift57	intraflagellar transport 57	regulation of transcription, DNA-dependent
AK006196	bidirectional	up	N/A	N/A	chr15	+	74539780	74540778	NM_008415	Jrk	Jerky	DNA binding
AK019567	intergenic	up	up	positive	chr5	-	46318060	46323648	NM_172153	Lcorl	ligand dependent nuclear receptor corepressor-like	regulation of transcription from RNA polymerase II promoter
AK029296	exonic antisense	up	up	positive	chr3	-	130811943	130815008	NM_010703	Lef1	lymphoid enhancer binding factor 1	negative regulation of transcription from RNA polymerase II promoter; positive regulation of transcription from RNA polymerase II promoter
AK010802	exonic antisense	up	down	negtive	chr4	-	73896768	73898483	NM_144787	Kdm4c	lysine (K)-specific demethylase 4C	regulation of transcription from RNA polymerase II promoter
AK013706	intergenic	down	down	positive	chrX	-	148749758	148750260	NM_013668	Kdm5c	lysine (K)-specific demethylase 5C	regulation of transcription, DNA-dependent
AK086422	intronic sense	down	down	positive	chr3	-	51676911	51679758	NM_001004176	Maml3	mastermind like 3 (Drosophila)	positive regulation of transcription from RNA polymerase II promoter
AK006966	intergenic	down	down	positive	chr5	+	119558242	119564552	NM_172424	Med13l	mediator complex subunit 13-like	transcription from RNA polymerase II promoter
AK017500	intergenic	down	N/A	N/A	chrX	+	12619140	12622421	NM_012005	Med14	mediator complex subunit 14	positive regulation of transcription from RNA polymerase II promoter
AK016836	intergenic	up	N/A	N/A	chr13	+	70098710	70102315	NM_138596	Med10	mediator complex subunit 10	positive regulation of transcription from RNA polymerase II promoter
AK037414	exonic sense	down	N/A	N/A	chr12	-	82681630	82684348	NM_027213	Med6	mediator complex subunit 6	RNA polymerase II transcription cofactor activity
AK007947	intergenic	down	N/A	N/A	chr11	+	59735000	59735391	NM_138675	Med9	mediator complex subunit 9	RNA polymerase II transcription cofactor activity
AK076700	intergenic	up	N/A	N/A	chr11	+	101813733	101821887	NM_010791	Meox1	mesenchyme homeobox 1	positive regulation of transcription from RNA polymerase II promoter
AK052676	intronic sense	down	down	positive	chrX	-	71326373	71329610	NM_001081979	Mecp2	methyl CpG binding protein 2	negative regulation of transcription from RNA polymerase II promoter; positive regulation of transcription, DNA-dependent
AK006816	intergenic	up	down	negtive	chr16	+	17047612	17049204	NM_011949	Mapk1	mitogen-activated protein kinase 1	positive regulation of transcription, DNA-dependent
AK017098	intergenic	up	N/A	N/A	chr4	-	48983567	48985037	NM_026509	Murc	muscle-related coiled-coil protein	positive regulation of transcription from RNA polymerase II promoter
AK048225	exonic sense	up	up	positive	chr12	+	30213265	30216444	NM_001093778	Myt1l	myelin transcription factor 1-like	sequence-specific DNA binding transcription factor activity
AK040104	intergenic	up	down	negtive	chr15	-	63245954	63311163	NM_010849	Myc	myelocytomatosis oncogene	negative regulation of transcription from RNA polymerase II promoter; positive regulation of transcription from RNA polymerase II promoter
AK149295	intergenic	down	down	positive	chr5	+	25005758	25008367	NM_001081383	Mll3	myeloid/lymphoid or mixed-lineage leukemia 3	regulation of transcription, DNA-dependent
AK013579	intergenic	down	N/A	N/A	chr5	-	22910094	22910891	NM_026984	Mll5	myeloid/lymphoid or mixed-lineage leukemia 5	positive regulation of transcription, DNA-dependent
AK054505	intronic sense	down	down	positive	chr13	+	83761110	83764562	NM_025282	Mef2c	myocyte enhancer factor 2C	negative regulation of transcription from RNA polymerase II promoter
AK006355	intergenic	up	N/A	N/A	chr7	-	53601140	53604424	NM_010866	Myod1	myogenic differentiation 1	positive regulation of transcription from RNA polymerase II promoter
AK078191	intergenic	up	down	negtive	chr7	-	68849404	69072460	NM_010882	Ndn	necdin	regulation of transcription, DNA-dependent
AK036157	exonic sense	down	down	positive	chr9	-	58755078	58758922	NM_008684	Neo1	neogenin	regulation of transcription, DNA-dependent
AK137938	intronic sense	down	N/A	N/A	chr14	-	56283881	56286994	NM_008683	Nedd8	neural precursor cell expressed, developmentally down-regulated gene 8	regulation of transcription from RNA polymerase II promoter
AK083943	intronic sense	down	down	positive	chr8	-	32955571	32959506	NM_178591	Nrg1	neuregulin 1	negative regulation of transcription, DNA-dependent
AK082480	intronic sense	down	N/A	N/A	chr12	+	54479892	54482768	NM_013780	Npas3	neuronal PAS domain protein 3	regulation of transcription, DNA-dependent; transcription, DNA-dependent
AK016875	intergenic	up	N/A	N/A	chr6	+	85326195	85327901	NM_001007472	Noto	notochord homolog (Xenopus laevis)	transcription, DNA-dependent
AK083863	intronic sense	down	down	positive	chr4	+	97569249	97572379	NM_001122952	Nfia	nuclear factor I/A	positive regulation of transcription from RNA polymerase II promoter
AK031521	intronic sense	down	down	positive	chr4	-	81961648	81965801	NM_001113210	Nfib	nuclear factor I/B	positive regulation of transcription from RNA polymerase II promoter
AK004108	intronic sense	down	down	positive	chr8	+	109836576	109837937	NM_133957	Nfat5	nuclear factor of activated T cells 5	positive regulation of transcription from RNA polymerase II promoter
AK079818	intergenic	up	down	negtive	chr18	-	80738630	80741285	NM_198429	Nfatc1	nuclear factor of activated T cells, cytoplasmic, calcineurin dependent 1	positive regulation of transcription from RNA polymerase II promoter
AK077216	exonic antisense	up	N/A	N/A	chr7	+	133539371	133541259	NM_010900	Nfatc2ip	nuclear factor of activated T cells, cytoplasmic, calcineurin dependent 2 interacting protein	regulation of transcription, DNA-dependent
Aldoart2	intergenic	up	down	negtive	chr12	+	56666121	56667696	NM_010907	Nfkbia	nuclear factor of kappa light polypeptide gene enhancer in B cells inhibitor, alpha	positive regulation of transcription from RNA polymerase II promoter
AK149068	intronic sense	down	N/A	N/A	chr2	-	75520476	75522078	NM_010902	Nfe2l2	nuclear factor, erythroid derived 2, like 2	positive regulation of transcription from RNA polymerase II promoter
AK038502	exonic antisense	down	N/A	N/A	chr11	+	62138977	62141804	NM_011308	Ncor1	nuclear receptor co-repressor 1	negative regulation of transcription from RNA polymerase II promoter
AK020076	exonic sense	down	down	positive	chr16	-	76351833	76373294	NM_173440	Nrip1	nuclear receptor interacting protein 1	negative regulation of transcription from RNA polymerase II promoter;positive regulation of transcription from RNA polymerase II promoter
AK053029	exonic antisense	down	down	positive	chr11	+	98630309	98634716	NM_145434	Nr1d1	nuclear receptor subfamily 1, group D, member 1	negative regulation of transcription from RNA polymerase II promoter
AK016127	intergenic	up	down	negtive	chr2	+	57034241	57040668	NM_001139509	Nr4a2	nuclear receptor subfamily 4, group A, member 2	positive regulation of transcription from RNA polymerase II promoter
AK133250	intergenic	up	N/A	N/A	chr4	+	48009327	48013333	NM_015743	Nr4a3	nuclear receptor subfamily 4, group A, member 3	RNA polymerase II core promoter proximal region sequence-specific DNA binding transcription factor activity involved in positive regulation of transcription
AK076660	intergenic	up	down	negtive	chr1	-	139824965	139865817	NM_001159769	Nr5a2	nuclear receptor subfamily 5, group A, member 2	positive regulation of transcription from RNA polymerase II promoter
AK076883	intergenic	up	down	negtive	chr6	+	29935330	29943776	NM_010938	Nrf1	nuclear respiratory factor 1	transcription, DNA-dependent
AK006461	intergenic	up	down	negtive	chr10	+	82274867	82286987	NM_010914	Nfyb	nuclear transcription factor-Y beta	positive regulation of transcription, DNA-dependent
BC048666	intergenic	up	down	negtive	chr18	-	64317377	64436834	NM_194268	Onecut2	one cut domain, family member 2	positive regulation of transcription from RNA polymerase II promoter
AK044555	intergenic	up	N/A	N/A	chr14	+	49498260	49499768	NM_144841	Otx2	orthodenticle homolog 2 (Drosophila)	positive regulation of transcription from RNA polymerase II promoter
AK007144	exonic antisense	up	up	positive	chr2	+	144157524	144158374	NM_026924	Ovol2	ovo-like 2 (Drosophila)	negative regulation of transcription, DNA-dependent
AB080658	intergenic	up	up	positive	chr2	-	147187278	147188529	NM_008780	Pax1	paired box gene 1	positive regulation of transcription from RNA polymerase II promoter
AK040987	intergenic	up	N/A	N/A	chr4	-	44537628	44539061	NM_008782	Pax5	paired box gene 5	negative regulation of transcription from RNA polymerase II promoter;positive regulation of transcription from RNA polymerase II promoter
AK016813	intergenic	up	N/A	N/A	chr11	-	50754215	50757243	NM_008936	Prop1	paired like homeodomain factor 1	negative regulation of transcription from RNA polymerase II promoter; positive regulation of transcription from RNA polymerase II promoter
AK016894	intergenic	up	up	positive	chr3	-	128402450	128404467	NM_001042504	Pitx2	paired-like homeodomain transcription factor 2	positive regulation of transcription from RNA polymerase II promoter
AK015420	intergenic	up	N/A	N/A	chr5	+	50542571	50547331	NM_008904	Ppargc1a	peroxisome proliferative activated receptor, gamma, coactivator 1 alpha	positive regulation of transcription from RNA polymerase II promoter
AK038224	intergenic	down	N/A	N/A	chr15	+	85507171	85511265	NM_011144	Ppara	peroxisome proliferator activated receptor alpha	negative regulation of transcription from RNA polymerase II promoter;positive regulation of transcription from RNA polymerase II promoter
AK006266	bidirectional	up	up	positive	chr7	-	88357073	88358059	NM_008803	Pde8a	phosphodiesterase 8A	regulation of transcription, DNA-dependent
AK053128	exonic antisense	down	down	positive	chr13	+	95793782	95796423	NM_172263	Pde8b	phosphodiesterase 8B	regulation of transcription, DNA-dependent
AK015361	intergenic	up	up	positive	chr12	+	75943761	75950648	NM_172805	Kcnh5	potassium voltage-gated channel, subfamily H (eag-related), member 5	regulation of transcription, DNA-dependent
AK030176	intronic sense	up	down	negtive	chr1	-	170278664	170280939	NM_183355	Pbx1	pre B cell leukemia homeobox 1	positive regulation of transcription from RNA polymerase II promoter
NR_026798	intergenic	up	down	negtive	chr13	-	21596184	21598393	NM_001039115	Zkscan4	zinc finger with KRAB and SCAN domains 4	transcription, DNA-dependent
AK018974	intergenic	up	N/A	N/A	chr12	-	82024422	82025434	NM_009159	Srsf5	serine/arginine-rich splicing factor 5	regulation of transcription, DNA-dependent
AK145430	bidirectional	up	N/A	N/A	chr12	-	82043659	82046383	NM_009159	Srsf5	serine/arginine-rich splicing factor 5	regulation of transcription, DNA-dependent; transcription, DNA-dependent
AK144510	intergenic	down	down	positive	chr5	-	149770464	149771256	NM_010439	Hmgb1	high mobility group box 1	negative regulation of RNA polymerase II transcriptional preinitiation complex assembly; positive regulation of transcription from RNA polymerase II promoter
AK019745	intronic antisense	up	N/A	N/A	chr4	-	146771276	146773788	NM_001039209	Gm13152	predicted gene 13152	regulation of transcription, DNA-dependent
AK161354	intergenic	up	up	positive	chr4	+	145651140	145655251	NM_001103158	Gm13242	predicted gene 13242	regulation of transcription, DNA-dependent
AK017111	intergenic	up	N/A	N/A	chr4	-	146437474	146442545	NM_001083918	Gm13139	predicted gene 13139	regulation of transcription, DNA-dependent
AK140411	exonic sense	down	down	positive	chr4	-	19536334	19538876	NM_177327	Wwp1	WW domain containing E3 ubiquitin protein ligase 1	negative regulation of transcription, DNA-dependent
LOC626832	intergenic	down	N/A	N/A	chr2	-	177670697	177691993	NM_001024849	Gm14325	predicted gene 14325	regulation of transcription, DNA-dependent
AK019828	intergenic	up	up	positive	chr10	+	116039847	116040350	NM_001033333	Gm239	predicted gene 239	sequence-specific DNA binding transcription factor activity
BC066226	intergenic	down	N/A	N/A	chr13	+	61872943	61902020	NM_001039239	Zfp808	zinc finger protein 80	regulation of transcription, DNA-dependent
AK042238	exonic sense	down	down	positive	chr4	+	3502043	3503929	NM_054089	Tgs1	trimethylguanosine synthase homolog (S. cerevisiae)	regulation of transcription, DNA-dependent
AK147860	exonic antisense	up	up	positive	chr8	+	98330729	98345628	NM_178078	Cnot1	CCR4-NOT transcription complex, subunit 1	regulation of transcription, DNA-dependent
AK007113	exonic antisense	up	down	negtive	chr4	+	118966741	118967752	NM_011732	Ybx1	Y box protein 1	negative regulation of transcription from RNA polymerase II promoter;transcription, DNA-dependent
BC098228	exonic antisense	up	up	positive	chr10	+	119801226	119819892	NM_010441	Hmga2	high mobility group AT-hook 2	RNA polymerase II core promoter proximal region sequence-specific DNA binding transcription factor activity involved in negative regulation of transcription; RNA polymerase II core promoter proximal region sequence-specific DNA binding transcription factor activity involved in positive regulation of transcription
AK017178	intronic sense	down	down	positive	chrX	-	45794781	45796288	NM_019680	Elf4	E74-like factor 4 (ets domain transcription factor)	positive regulation of transcription from RNA polymerase II promoter
AK006506	bidirectional	up	down	negtive	chr11	+	70468664	70469141	NM_011072	Pfn1	profilin 1	positive regulation of transcription from RNA polymerase II promoter
AK041313	exonic antisense	down	down	positive	chr19	-	47200639	47202971	NM_011053	Pdcd11	programmed cell death 11	regulation of transcription, DNA-dependent
AK030271	intergenic	up	up	positive	chr13	+	13127124	13131203	NM_031191	Prl2c2	prolactin family 2, subfamily c, member 2	positive regulation of transcription from RNA polymerase II promoter
AK015152	intergenic	up	down	negtive	chr5	+	123728136	123729594	NM_026000	Psmd9	proteasome (prosome, macropain) 26S subunit, non-ATPase, 9	positive regulation of transcription, DNA-dependent
AK015850	bidirectional	up	down	negtive	chr18	-	77302865	77303796	NM_008602	Pias2	protein inhibitor of activated STAT 2	positive regulation of transcription from RNA polymerase II promoter
AK015663	bidirectional	up	down	negtive	chr18	-	77303132	77303866	NM_008602	Pias2	protein inhibitor of activated STAT 2	positive regulation of transcription from RNA polymerase II promoter
AK029795	intergenic	up	down	negtive	chr10	+	60494050	60500828	NM_025273	Pcbd1	pterin 4 alpha carbinolamine dehydratase/dimerization cofactor of hepatocyte nuclear factor 1 alpha (TCF1) 1	positive regulation of transcription, DNA-dependent
BC002209	exonic antisense	up	N/A	N/A	chr11	+	6375032	6375427	NM_011221	Purb	purine rich element binding protein B	negative regulation of transcription, DNA-dependent
AK004326	intergenic	up	down	negtive	chr5	+	20234211	20234710	NM_172992	Phtf2	putative homeodomain transcription factor 2	regulation of transcription, DNA-dependent
BC048601	intergenic	up	down	negtive	chr13	-	37783953	37809517	NM_026830	Rreb1	ras responsive element binding protein 1	negative regulation of transcription, DNA-dependent
AK017377	exonic sense	up	up	positive	chr17	-	56969081	56970333	NM_027787	Rfx2	regulatory factor X, 2 (influences HLA class II expression)	regulation of transcription, DNA-dependent
AK006689	intergenic	up	up	positive	chr10	+	51386794	51395637	NM_001159389	Rfx6	regulatory factor X, 6	positive regulation of transcription, DNA-dependent
2310073E15Rik	exonic antisense	down	down	positive	chr8	+	72655231	72656553	NM_011266	Rfxank	regulatory factor X-associated ankyrin-containing protein (Rfxank)	positive regulation of transcription from RNA polymerase II promoter
AK019036	intergenic	up	down	negtive	chr16	-	93344988	93354316	NM_001111021	Runx1	runt related transcription factor 1	positive regulation of transcription from RNA polymerase II promoter
AK007217	intergenic	up	N/A	N/A	chr4	-	14146642	14164597	NM_001111027	Runx1t1	runt-related transcription factor 1; translocated to, 1 (cyclin D-related)	regulation of transcription, DNA-dependent
AK016392	intergenic	up	N/A	N/A	chr18	-	81422945	81432805	NM_178280	Sall3	sal-like 3 (Drosophila)	regulation of transcription, DNA-dependent
AK006937	intergenic	up	down	negtive	chr1	-	51514777	51515775	NM_138741	Sdpr	serum deprivation response	positive regulation of transcription from RNA polymerase II promoter
AK161715	exonic sense	up	N/A	N/A	chr10	+	42580461	42583123	NM_172938	Scml4	sex comb on midleg-like 4 (Drosophila)	regulation of transcription, DNA-dependent
AK088966	exonic sense	down	down	positive	chr11	-	100682021	100684248	NM_001113563	Stat5b	signal transducer and activator of transcription 5B	positive regulation of transcription from RNA polymerase II promoter
AK006707	intergenic	up	down	negtive	chr15	+	11896816	11899819	NM_011294	Sub1	SUB1 homolog (S. cerevisiae)	regulation of transcription from RNA polymerase II promoter
AK005857	intergenic	up	down	negtive	chr7	+	79106060	79172203	NM_183261	Nr2f2	nuclear receptor subfamily 2, group F, member 2	negative regulation of transcription from RNA polymerase II promoter;positive regulation of transcription, DNA-dependent
AK051651	exonic antisense	down	down	positive	chr7	+	77509795	77513505	NM_183261	Nr2f2	nuclear receptor subfamily 2, group F, member 2	negative regulation of transcription from RNA polymerase II promoter;positive regulation of transcription, DNA-dependent
AK032419	intergenic	down	N/A	N/A	chr9	+	13349094	13352732	NM_001013813	Maml2	mastermind like 2 (Drosophila)	positive regulation of transcription from RNA polymerase II promoter
AK142969	intronic sense	down	down	positive	chr7	-	74427442	74429566	NM_001033713	Mef2a	myocyte enhancer factor 2A	negative regulation of transcription from RNA polymerase II promoter
AK135606	intronic sense	down	N/A	N/A	chr2	-	34193103	34195572	NM_016768	Pbx3	pre B cell leukemia homeobox 3	negative regulation of transcription from RNA polymerase II promoter
AK015151	intronic sense	down	down	positive	chr2	+	105001980	105002756	NM_144783	Wt1	Wilms tumor 1 homolog	transcription, DNA-dependent
AK161337	intergenic	down	down	positive	chr7	+	28554249	28555744	NM_029531	Zfp60	zinc finger protein 60	regulation of transcription, DNA-dependent
AK053200	intergenic	down	down	positive	chr8	-	118097580	118099141	NM_001025577	Maf	avian musculoaponeurotic fibrosarcoma (v-maf) AS42 oncogene homolog	negative regulation of transcription from RNA polymerase II promoter; positive regulation of transcription from RNA polymerase II promoter
AK015580	intergenic	up	down	negtive	chr18	-	36480559	36481146	NM_008989	Pura	purine rich element binding protein A	negative regulation of transcription, DNA-dependent
AK080243	intronic sense	down	N/A	N/A	chr11	+	96668514	96669461	NM_007622	Cbx1	chromobox 1	negative regulation of transcription, DNA-dependent
AK029564	intergenic	up	N/A	N/A	chr13	+	53495638	53498303	NM_013601	Msx2	homeobox, msh-like 2 (Msx2),	negative regulation of transcription from RNA polymerase II promoter
AK016132	intergenic	up	up	positive	chr13	-	73343540	73366548	NM_010574	Irx2	Iroquois related homeobox 2 (Drosophila)	sequence-specific DNA binding transcription factor activity
AK083165	exonic sense	down	down	positive	chr11	-	120486437	120490077	NM_010756	Mafg	v-maf musculoaponeurotic fibrosarcoma oncogene family, protein G (avian)	transcription, DNA-dependent
AK039045	intronic sense	down	N/A	N/A	chr10	-	67629265	67629908	NM_023598	Arid5b	AT rich interactive domain 5B (MRF1-like)	positive regulation of sequence-specific DNA binding transcription factor activity
AK005214	exonic sense	down	N/A	N/A	chr10	+	62563111	62563726	NM_016864	Atoh7	atonal homolog 7 (Drosophila)	regulation of transcription, DNA-dependent
AK047823	intronic sense	down	down	positive	chr11	+	115814058	115817575	NM_020483	Sap30bp	SAP30 binding protein	regulation of transcription, DNA-dependent
AK017011	intergenic	up	down	negtive	chr13	+	91398995	91414559	NM_024272	Ssbp2	single-stranded DNA binding protein 2	regulation of transcription, DNA-dependent
AK088368	intronic sense	down	down	positive	chr17	-	51884853	51888009	NM_009122	Satb1	special AT-rich sequence binding protein 1	negative regulation of transcription from RNA polymerase II promoter
AK048959	intronic sense	down	down	positive	chr17	-	51896620	51901147	NM_009122	Satb1	special AT-rich sequence binding protein 1	negative regulation of transcription from RNA polymerase II promoter
BC055113	intergenic	up	N/A	N/A	chr1	+	57184591	57186244	NM_139146	Satb2	special AT-rich sequence binding protein 2	negative regulation of transcription from RNA polymerase II promoter; positive regulation of transcription from RNA polymerase II promoter
AK133080	bidirectional	up	N/A	N/A	chr11	-	79805811	79806303	NM_199196	Suz12	suppressor of zeste 12 homolog (Drosophila)	negative regulation of transcription from RNA polymerase II promoter
AK007141	intergenic	up	down	negtive	chr18	-	83462183	83495276	NM_001081300	Tshz1	teashirt zinc finger family member 1	transcription, DNA-dependent
AK035492	intergenic	down	down	positive	chr2	-	169449555	169453818	NM_080455	Tshz2	teashirt zinc finger family member 2	transcription, DNA-dependent
AK084995	intronic sense	down	down	positive	chr7	+	37512195	37514581	NM_172298	Tshz3	teashirt zinc finger family member 3	negative regulation of transcription, DNA-dependent
AK136927	intergenic	down	down	positive	chr10	-	91544494	91596204	NM_001080129	Tmpo	thymopoietin	regulation of transcription, DNA-dependent
AK015026	intergenic	down	down	positive	chr10	+	91863758	91880240	NM_001080129	Tmpo	thymopoietin	regulation of transcription, DNA-dependent
AK019889	intergenic	up	N/A	N/A	chr2	-	72622737	72651774	NM_001018042	Sp3	trans-acting transcription factor 3	positive regulation of transcription, DNA-dependent
AK045275	exonic antisense	down	down	positive	chr2	-	73113247	73116038	NM_001005343	Sp9	trans-acting transcription factor 9	regulation of transcription, DNA-dependent
AK048564	exonic sense	down	down	positive	chr1	+	4874402	4877121	NM_001159751	Tcea1	transcription elongation factor A (SII) 1	positive regulation of transcription from RNA polymerase II promoter
AK083519	bidirectional	up	N/A	N/A	chr1	+	16647632	16652359	NM_026456	Tceb1	transcription elongation factor B (SIII), polypeptide 1	regulation of transcription, DNA-dependent
AK012901	intronic sense	down	down	positive	chr9	-	71831635	71833480	NM_011544	Tcf12	transcription factor 12	positive regulation of transcription, DNA-dependent
AK133162	exonic antisense	up	N/A	N/A	chr15	+	82683285	82689885	NM_001114140	Tcf20	transcription factor 20	positive regulation of transcription from RNA polymerase II promoter
AK080278	intronic antisense	up	N/A	N/A	chr15	+	82729509	82736246	NM_001114140	Tcf20	transcription factor 20	positive regulation of transcription from RNA polymerase II promoter
AK033378	intron antisense	down	down	positive	chr10	+	22535554	22543136	NM_011545	Tcf21	transcription factor 21	RNA polymerase II core promoter proximal region sequence-specific DNA binding transcription factor activity involved in negative regulation of transcription;RNA polymerase II core promoter proximal region sequence-specific DNA binding transcription factor activity involved in positive regulation of transcription
AK053994	intronic antisense	up	down	negtive	chr6	+	72649207	72655084	NM_001079822	Tcf7l1	transcription factor 7 like 1 (T cell specific, HMG box)	negative regulation of transcription, DNA-dependent; positive regulation of transcription from RNA polymerase II promoter during mitosis
AK032144	intronic sense	down	down	positive	chr18	+	69573491	69574662	NM_013685	Tcf4	transcription factor 4	negative regulation of transcription from RNA polymerase II promoter;transcription initiation from RNA polymerase II promoter
AK021120	intronic sense	down	down	positive	chr18	+	69752256	69752713	NM_013685	Tcf4	transcription factor 4	negative regulation of transcription from RNA polymerase II promoter;transcription initiation from RNA polymerase II promoter
AK038091	intronic sense	down	down	positive	chr11	-	52084887	52089239	NM_009331	Tcf7	transcription factor 7, T cell specific	negative regulation of transcription from RNA polymerase II promoter
AK007128	intergenic	up	down	negtive	chr19	+	56140617	56141424	NM_009333	Tcf7l2	transcription factor 7 like 2, T cell specific, HMG box	regulation of transcription from RNA polymerase II promoter
AK084192	intronic sense	down	down	positive	chr19	+	55847319	55849810	NM_009333	Tcf7l2	transcription factor 7 like 2, T cell specific, HMG box	regulation of transcription from RNA polymerase II promoter
AK083427	intronic sense	down	down	positive	chr19	+	55900229	55903697	NM_009333	Tcf7l2	transcription factor 7 like 2, T cell specific, HMG box	regulation of transcription from RNA polymerase II promoter
AK018958	intergenic	up	down	negtive	chr10	+	70664492	70667235	NM_009360	Tfam	transcription factor A, mitochondrial	positive regulation of transcription, DNA-dependent
AK006845	intergenic	up	N/A	N/A	chr2	+	172688060	172688623	NM_009335	Tfap2c	transcription factor AP-2, gamma	positive regulation of transcription from RNA polymerase II promoter
AK015782	bidirectional	up	up	positive	chr17	+	3557823	3559862	NM_146074	Tfb1m	transcription factor B1, mitochondrial	regulation of transcription, DNA-dependent
AK030164	exonic antisense	up	N/A	N/A	chr1	-	168308012	168310049	NM_030245	Tada1	transcriptional adaptor 1	regulation of transcription, DNA-dependent
AK042305	intergenic	down	down	positive	chr17	+	47498212	47498903	NM_172622	Trerf1	transcriptional regulating factor 1	positive regulation of transcription, DNA-dependent
AK012238	intronic antisense	up	down	negtive	chr9	-	56923022	56923820	NM_001110351	Sin3a	transcriptional regulator, SIN3A (yeast)	regulation of transcription from RNA polymerase II promoter in response to oxidative stress
AK015118	intergenic	up	N/A	N/A	chr3	+	23359971	23420249	NM_030732	Tbl1xr1	transducin (beta)-like 1X-linked receptor 1	negative regulation of transcription from RNA polymerase II promoter; positive regulation of transcription from RNA polymerase II promoter
AK043880	bidirectional	down	down	positive	chr4	+	71862287	71864964	NM_011599	Tle1	transducin-like enhancer of split 1 homolog of Drosophila E(spl)	negative regulation of transcription from RNA polymerase II promoter
AK017039	intergenic	up	down	negtive	chr9	-	60950818	60953192	NM_001083927	Tle3	transducin-like enhancer of split 3, homolog of Drosophila E(spl)	regulation of transcription, DNA-dependent
AK030733	intronic sense	down	down	positive	chr19	-	14559762	14562794	NM_011600	Tle4	transducin-like enhancer of split 4, homolog of Drosophila E(spl)	negative regulation of transcription from RNA polymerase II promoter
AK006053	intergenic	up	up	positive	chr1	-	73069058	73069453	NM_009407	Tnp1	transition protein 1	DNA binding
AK051400	intronic sense	down	down	positive	chr15	-	50557186	50559915	NM_032000	Trps1	trichorhinophalangeal syndrome I (human)	negative regulation of transcription, DNA-dependent
AK016962	bidirectional	up	up	positive	chr7	+	116637610	116638627	NM_181853	Trim66	tripartite motif-containing 66	negative regulation of transcription, DNA-dependent
BC060604	exonic antisense	down	down	positive	chr1	-	93695104	93699514	NM_007855	Twist2	twist homolog 2 (Drosophila)	negative regulation of transcription from RNA polymerase II promoter
AK144366	intergenic	down	N/A	N/A	chr7	-	147142903	147143938	NM_009482	Utf1	undifferentiated embryonic cell transcription factor 1	positive regulation of transcription from RNA polymerase II promoter
AK015836	intergenic	up	down	negtive	chr12	+	12909525	12914184	NM_008709	Mycn	v-myc myelocytomatosis viral related oncogene, neuroblastoma derived (avian)	positive regulation of transcription from RNA polymerase II promoter
AK016022	intergenic	up	down	negtive	chr17	-	46016798	46018389	NM_001025257	Vegfa	vascular endothelial growth factor A	positive regulation of transcription from RNA polymerase II promoter
AK076253	intronic sense	down	down	positive	chr6	-	114851924	114855164	NM_177683	Vgll4	vestigial like 4 (Drosophila)	regulation of transcription, DNA-dependent
AK006740	exonic antisense	up	down	negtive	chr9	+	7965837	7977004	NM_009534	Yap1	yes-associated protein 1	positive regulation of transcription from RNA polymerase II promoter
AY039009	intronic sense	down	down	positive	chr2	-	44929031	44935120	NM_015753	Zeb2	zinc finger E-box binding homeobox 2	transcription, DNA-dependent
AK080917	intronic sense	down	down	positive	chr9	-	48502581	48505735	NM_001033324	Zbtb16	zinc finger and BTB domain containing 16	negative regulation of transcription, DNA-dependent; positive regulation of transcription, DNA-dependent
AK020870	intronic sense	down	down	positive	chr16	+	43578557	43578941	NM_181058	Zbtb20	zinc finger and BTB domain containing 20	RNA polymerase II core promoter proximal region sequence-specific DNA binding transcription factor activity involved in negative regulation of transcription
AK015174	intergenic	up	N/A	N/A	chr9	-	30836564	30837420	NM_001115130	Zbtb44	zinc finger and BTB domain containing 44	regulation of transcription, DNA-dependent
AK083706	intergenic	down	N/A	N/A	chr8	+	111599121	111777539	NM_007496	Zfhx3	zinc finger homeodomain 3	negative regulation of transcription from RNA polymerase II promoter
AK019767	intergenic	up	down	negtive	chr3	-	5512994	5515333	NM_030708	Zfhx4	zinc finger homeodomain 4	sequence-specific DNA binding transcription factor activity
AK087385	intronic sense	down	N/A	N/A	chr17	+	21877465	21879333	NM_001164676	Zfp229	zinc finger protein 229	regulation of transcription, DNA-dependent
AK006947	intergenic	up	N/A	N/A	chr13	-	141204	142745	NM_028245	Zfp131	zinc finger protein 131	regulation of transcription, DNA-dependent
AK078757	intergenic	down	N/A	N/A	chr7	+	117201685	117204328	NM_009281	Zfp143	zinc finger protein 143	regulation of transcription, DNA-dependent
AK160141	bidirectional	up	N/A	N/A	chr16	-	33379940	33380813	NM_011749	Zfp148	zinc finger protein 148	negative regulation of transcription from RNA polymerase II promoter; positive regulation of transcription from RNA polymerase II promoter
AK030245	intergenic	up	down	negtive	chr17	+	21228171	21240311	NM_145483	Zfp160	zinc finger protein 160	regulation of transcription, DNA-dependent
AK015230	exonic antisense	up	up	positive	chr13	+	48586430	48587428	NM_001164575	Zfp169	zinc finger protein 169	regulation of transcription, DNA-dependent
NR_026798	intergenic	up	down	negtive	chr13	-	21596184	21598393	NM_139141	Zfp192	zinc finger protein 192	transcription, DNA-dependent
AK042866	exonic antisense	up	down	negtive	chr6	+	118405224	118405719	NM_028335	Zfp248	zinc finger protein 248	regulation of transcription, DNA-dependent
BC100427	intergenic	up	down	negtive	chr13	+	67932042	67944229	NM_198322	Zfp273	zinc finger protein 273	regulation of transcription, DNA-dependent
AK016750	intergenic	up	down	negtive	chr1	-	138499609	138502045	NM_177643	Zfp281	zinc finger protein 281	Transcription regulation
AK019541	intergenic	up	N/A	N/A	chr11	-	62570679	62574060	NM_138949	Zfp286	zinc finger protein 286	regulation of transcription, DNA-dependent
AK019541	intergenic	up	N/A	N/A	chr11	-	62570679	62574060	NM_133208	Zfp287	zinc finger protein 287	positive regulation of transcription, DNA-dependent
AK015451	intergenic	up	down	negtive	chrX	-	20783706	20798791	NM_183185	Zfp300	zinc finger protein 300	regulation of transcription, DNA-dependent
AK016161	intergenic	up	down	negtive	chr13	-	23368072	23405269	NM_172586	Zfp322a	zinc finger protein 322A	regulation of transcription, DNA-dependent
AK019651	intergenic	up	down	negtive	chr7	-	13535041	13535415	NM_178732	Zfp324	zinc finger protein 324	regulation of transcription, DNA-dependent
AK015287	intergenic	up	N/A	N/A	chr5	-	106793579	106795868	NM_018759	Zfp326	zinc finger protein 326	positive regulation of transcription, DNA-dependent; regulation of DNA-dependent transcription, elongation
AK006720	intergenic	up	N/A	N/A	chr7	+	13366208	13366951	NM_026046	Zfp329	zinc finger protein 329	regulation of transcription, DNA-dependent; transcription, DNA-dependent
AK016813	intergenic	up	up	positive	chr11	-	50754215	50757243	NM_013744	Zfp354b	zinc finger protein 354B	regulation of transcription, DNA-dependent; transcription, DNA-dependent
AK076976	intergenic	up	N/A	N/A	chr13	-	66604095	66620459	NM_178364	Zfp369	zinc finger protein 369	transcription, DNA-dependent
AB160648	intergenic	up	N/A	N/A	chr12	-	116861371	116861665	NM_001004066	Zfp386	zinc finger protein 386	regulation of transcription, DNA-dependent
AK028094	intergenic	up	down	negtive	chr14	+	65945167	65956441	NM_199029	Zfp395	zinc finger protein 395	DNA binding
AK007095	intergenic	up	N/A	N/A	chr8	-	90159997	90166082	NM_033327	Zfp423	zinc finger protein 423	positive regulation of transcription, DNA-dependent
AK005539	intergenic	up	down	negtive	chrX	+	53570830	53573841	NM_030139	Zfp449	zinc finger protein 449	transcription, DNA-dependent
AK033415	intergenic	down	N/A	N/A	chr5	+	146053638	146055877	NM_001081431	Zfp498	zinc finger protein 498	transcription, DNA-dependent
AK012226	intergenic	up	down	negtive	chr14	+	23403627	23418490	NM_145459	Zfp503	zinc finger protein 503	regulation of transcription, DNA-dependent; transcription, DNA-dependent
AK015588	bidirectional	up	N/A	N/A	chr5	-	31753591	31754704	NM_172993	Zfp512	zinc finger protein 512	regulation of transcription, DNA-dependent
AK016386	intronic antisense	up	N/A	N/A	chr18	-	83089331	83089940	NM_183033	Zfp516	zinc finger protein 516	regulation of transcription, DNA-dependent
AK087313	intergenic	up	N/A	N/A	chr19	+	40942805	40957129	NM_028319	Zfp518a	zinc finger protein 518A	regulation of transcription, DNA-dependent
AK015173	intergenic	up	down	negtive	chr5	+	38966091	38967007	NM_001081144	Zfp518b	zinc finger protein 518B	zinc ion binding
AK008102	intergenic	down	up	negtive	chr7	+	16633793	16634404	NM_001099277	Zfp541	zinc finger protein 541	regulation of transcription, DNA-dependent
AK011173	bidirectional	down	down	positive	chr7	-	134375931	134376644	NM_146201	Zfp553	zinc finger protein 553	regulation of transcription, DNA-dependent
BC039874	exonic antisense	up	up	positive	chr7	-	25866550	25867499	NM_175477	Zfp574	zinc finger protein 574	regulation of transcription, DNA-dependent
AK076965	intergenic	up	down	negtive	chr7	+	28554249	28556809	NM_011762	Zfp59	zinc finger protein 59	regulation of transcription, DNA-dependent
AK016610	intergenic	up	down	negtive	chr7	+	47930106	47946630	NM_001004139	Zfp619	zinc finger protein 619	regulation of transcription, DNA-dependent
AK035492	intergenic	down	down	positive	chr2	-	169449555	169453818	NM_009564	Zfp64	zinc finger protein 64	nucleic acid binding
AK006714	intronic antisense	up	up	positive	chr11	+	58136489	58137941	NM_178761	Zfp672	zinc finger protein 672	regulation of transcription, DNA-dependent
AK041042	exonic antisense	up	N/A	N/A	chr7	+	134592149	134600699	NM_175163	Zfp689	zinc finger protein 689	regulation of transcription, DNA-dependent
AK041843	intergenic	down	N/A	N/A	chr13	-	67206316	67209540	NM_001012325	Zfp708	zinc finger protein 708	regulation of transcription, DNA-dependent
AK041843	intergenic	down	N/A	N/A	chr13	-	67206316	67209540	NM_172392	Zfp759	zinc finger protein 759	regulation of transcription, DNA-dependent
NR_004441	intergenic	up	down	negtive	chr7	+	48923383	48982563	NM_023363	Zfp788	zinc finger protein 788	nucleic acid binding
AK028267	exonic sense	down	down	positive	chr8	+	81552119	81552364	NM_178267	Zfp827	zinc finger protein 827	regulation of transcription, DNA-dependent
AK162599	intergenic	down	down	positive	chr8	-	71904238	71919427	NM_172754	Zfp868	zinc finger protein 868	regulation of transcription, DNA-dependent
AK020829	intergenic	up	down	negtive	chr8	-	108929521	108930429	NM_011764	Zfp90	zinc finger protein 90	positive regulation of transcription, DNA-dependent
AK164331	intergenic	down	down	positive	chr17	+	17431406	17455068	NM_011765	Zfp97	zinc finger protein 97	regulation of transcription, DNA-dependent
BC084590	intergenic	down	down	positive	chrX	+	91213997	91220809	NM_001044386	Zfx	zinc finger protein X-linked	regulation of transcription, DNA-dependent
BC048765	intergenic	up	N/A	N/A	chr15	+	39994152	39999619	NM_011766	Zfpm2	zinc finger protein, multitype 2	negative regulation of transcription from RNA polymerase II promoter;positive regulation of transcription from RNA polymerase II promoter
AK031079	intergenic	up	N/A	N/A	chr7	-	132427538	132481786	NM_001081329	Zkscan2	zinc finger with KRAB and SCAN domains 2	transcription, DNA-dependent
AK003710	intergenic	down	down	positive	chr7	-	6623979	6625599	NM_011769	Zim1	zinc finger, imprinted 1	regulation of transcription, DNA-dependent
D10920	intergenic	down	N/A	N/A	chr4	+	62796041	62800121	NM_028326	Zfp618	zinc fingerprotein 618	nucleic acid binding
