# Supplementary material for: Long Non-Coding RNA Expression Profiling of Mouse Testis during Postnatal Development
Source: PLoS One. 2013 Oct 10;8(10):e75750. doi: 10.1371/journal.pone.0075750 (PMC3794988; doi:10.1371/journal.pone.0075750)
Supplement: Table S9 — List of lncRNAs associated protein-coding genes that enriched in testis development or spermatogenesis-related GO terms. (XLS) [file pone.0075750.s012.xls]

## Sheet: Sheet1
Seq ID	Genomic context	Regulation(LncRNA)	Regulation(mRNA)	Correlation	Chromosome	ChromosomeStrand	txStart	txEnd	Associated_gene_acc	Associated_gene_symbol	Associated_gene_full name	Gene Ontology (GO)
AK014037	intronic sense	down	down	positive	chr1	-	140725742	140727134	NM_010714	Lhx9	LIM/homeobox protein Lhx9	male gonad development
AK015151	intronic sense	down	down	positive	chr2	+	105001980	105002756	NM_144783	Wt1	Wilms tumor protein homolog	germ cell development;male gonad development
AK020216	intronic sense	down	N/A	N/A	chr2	+	90810340	90811129	NM_017368	Celf1	CUGBP Elav-like family member 1	gamete generation
AK030592	intronic sense	down	down	positive	chr11	-	88333600	88336661	NM_054043	Msi2	musashi RNA-binding protein 2	germ cell development
AK039862	intronic sense	down	N/A	N/A	chr11	-	74524036	74527464	NM_013625	Pafah1b1	Platelet-activating factor acetylhydrolase IB subunit alpha	gamete generation
AK046275	intronic sense	up	up	positive	chr18	-	43096529	43100551	NM_027531	Ppp2r2b	protein phosphatase 2 (formerly 2A), regulatory subunit B (PR 52), beta isoform	gamete generation
AK047377	intronic sense	down	down	positive	chr1	-	108594400	108597146	NM_177410	Bcl2	B-cell leukemia/lymphoma 2	male gonad development
AK080917	intronic sense	down	down	positive	chr9	-	48502581	48505735	NM_001033324	Zbtb16	Zinc finger and BTB domain containing 16	gamete generation
AK087704	intronic sense	down	down	positive	chrX	-	91333085	91336120	NM_001044386	Zfx	Zinc finger X-chromosomal protein	spermatogenesis
AK006385	intronic antisense	up	N/A	N/A	chr10	-	19890918	19895141	NM_008635	Mtap7	Microtubule-associated protein 7	germ cell development;spermatogenesis
AK005744	intronic antisense	up	up	positive	chr1	+	188949016	188951731	NM_028848	Spata17	spermatogenesis associated 17	spermatogenesis
AK015099	intronic antisense	up	N/A	N/A	chr10	-	19919052	19921644	NM_008635	Mtap7	Microtubule-associated protein 7	germ cell development;spermatogenesis
AK018844	intronic antisense	up	up	positive	chr5	-	150825053	150825318	NM_080468	Rxfp2	Relaxin receptor 2	male gonad development
AK003073	intergenic	down	down	positive	chr17	-	35088689	35089413	NM_010478	Hspa1b	heat shock protein 1B	gamete generation
AK005833	intergenic	up	N/A	N/A	chr14	-	25425925	25436533	NM_183208	Zmiz1	zinc finger, MIZ-type containing 1	gamete generation
AK005961	intergenic	up	up	positive	chr9	-	62115182	62115650	NM_025721	Spesp1	Sperm equatorial segment protein 1	spermatogenesis
AK006053	intergenic	up	up	positive	chr1	-	73069058	73069453	NM_009407	Tnp1	Spermatid nuclear transition protein 1	gamete generation
AK006406	intergenic	up	up	positive	chr1	+	73062609	73072072	NM_009407	Tnp1	Spermatid nuclear transition protein 1	gamete generation
AK006540	intergenic	up	down	negative	chr6	-	117629226	117701787	NM_021704	Cxcl12	Chemokine (C-X-C motif) ligand 12	germ cell development
AK006618	intergenic	up	down	negative	chr4	-	136672624	136673497	NM_009523	Wnt4	wingless-related MMTV integration site 4	male gonad development; gamete generation
AK006664	intergenic	up	N/A	N/A	chr5	+	122964028	122969608	NM_009879	Ift81	Intraflagellar transport 81 homolog (Chlamydomonas)	spermatogenesis
AK006721	intergenic	up	down	negative	chr13	-	51009339	51025250	NM_011462	Spin1	Spindlin 1	gamete generation
AK007110	intergenic	up	N/A	N/A	chr12	-	7378863	7387136	NM_009693	Apob	Apolipoprotein B	spermatogenesis
AK007111	intergenic	up	up	positive	chr6	+	140257591	140258261	NM_007605	Capza3	F-actin-capping protein subunit alpha-3	gamete generation
AK007157	intergenic	up	down	negative	chr17	+	10517466	10522172	NM_021881	Qk	quaking	gamete generation
AK008102	intergenic	down	up	negative	chr7	+	16633793	16634404	NM_001099277	Zfp541	Zinc finger protein 541	spermatogenesis
AK008724	intergenic	down	down	positive	chrX	+	150158132	150175807	NM_001005370	Spin2	Spindlin-2	gamete generation
AK012924	intergenic	down	down	positive	chr6	-	117094342	117095187	NM_001012477	Cxcl12	Stromal cell-derived factor 1	germ cell development;germ cell migration
AK015084	intergenic	up	N/A	N/A	chr12	-	5933833	5950438	NM_009693	Apob	Apolipoprotein B	spermatogenesis
AK015227	intergenic	up	N/A	N/A	chr14	+	25441359	25448422	NM_183208	Zmiz1	zinc finger, MIZ-type containing 1	gamete generation
AK015232	intergenic	up	N/A	N/A	chr14	+	71820818	71821418	NM_207636	Fndc3a	Fibronectin type III domain containing 3A	male gonad development; gamete generation
AK015266	intergenic	up	down	negative	chr10	-	44450574	44458706	NM_007548	Prdm1	PR domain containing 1, with ZNF domain	germ cell development
AK015316	intergenic	up	N/A	N/A	chr14	+	72256515	72320245	NM_207636	Fndc3a	Fibronectin type III domain containing 3A	male gonad development; gamete generation
AK015416	intergenic	up	down	negative	chr14	+	72256515	72320245	NM_207675	Cadm1	Cell adhesion molecule 1	spermatogenesis
AK015499	intergenic	up	up	positive	chr12	+	102387316	102387968	NM_173023	Catsperb	Cation channel, sperm-associated, beta	gamete generation
AK015520	intergenic	up	down	negative	chr13	-	115376720	115397292	NM_008046	Fst	Follistatin	gamete generation
AK015526	intergenic	up	down	negative	chr11	+	112686467	112687524	NM_011448	Sox9	SRY-box containing gene 9	male gonad development
AK015835	intergenic	up	down	negative	chr13	-	50848761	50860617	NM_011462	Spin1	Spindlin 1	gamete generation
AK016174	intergenic	up	down	negative	chrX	+	125586059	125601682	NM_172493	Diap2	diaphanous homolog 2 (Drosophila)	gamete generation
AK016280	intergenic	up	up	positive	chr18	-	43228329	43330928	NM_027531	Ppp2r2b	protein phosphatase 2 (formerly 2A), regulatory subunit B (PR 52), beta isoform	gamete generation
AK016284	intergenic	up	N/A	N/A	chr14	-	25959280	25962727	NM_183208	Zmiz1	zinc finger, MIZ-type containing 1	gamete generation
AK016393	intergenic	up	N/A	N/A	chr3	+	37512844	37513748	NM_021343	Spata5	Spermatogenesis associated 5	spermatogenesis
AK016410	intergenic	up	N/A	N/A	chr1	-	97597760	97613095	NM_172658	Slco4c1	Solute carrier organic anion transporter family, member 4C1	spermatogenesis
AK016439	intergenic	up	up	positive	chr5	+	150654873	150656980	NM_080468	Rxfp2	Relaxin receptor 2	male gonad development
AK016587	intergenic	up	down	negative	chr17	+	89719566	89726673	NM_013523	Fshr	Follicle stimulating hormone receptor	spermatogenesis
AK016605	intergenic	up	up	positive	chr16	-	16707706	16718189	NM_015773	Spag6	Sperm-associated antigen 6	spermatogenesis
AK016734	intergenic	up	up	positive	chr5	+	73035649	73037779	NM_007723	Cnga1	cyclic nucleotide gated channel alpha 1	gamete generation
AK016790	intergenic	up	up	positive	chrY	-	18002746	18013379	NM_023546	Ssty2	Spermiogenesis specific transcript on the Y 2	gamete generation
AK016999	intergenic	up	N/A	N/A	chr11	+	24381908	24469952	NM_025923	Fancl	Fanconi anemia, complementation group L	gamete generation
AK052984	intergenic	up	down	negative	chr15	-	102953500	102977259	NM_013553	Hoxc4	homeobox C4	germ cell development
AK017039	intergenic	up	down	negative	chr9	-	60950818	60953192	NM_009389	Tle3	Transducin-like enhancer of split 3, homolog of Drosophila	spermatogenesis
AK018992	intergenic	up	down	negative	chr12	-	114113426	114114025	NM_010588	Jag2	Jagged 2	gamete generation
AK019626	intergenic	up	down	negative	chr17	-	9943616	9968732	NM_021881	Qk	quaking	gamete generation
AK019668	intergenic	up	down	negative	chr6	+	84485869	84486315	NM_175475	Cyp26b1	Cytochrome P450, family 26, subfamily b, polypeptide 1	spermatogenesis
AK019699	intergenic	up	N/A	N/A	chr14	+	25441359	25442082	NM_183208	Zmiz1	zinc finger, MIZ-type containing 1	gamete generation
AK031998	intergenic	down	N/A	N/A	chr6	-	54455887	54457912	NM_001167860	Wipf3	WAS/WASL interacting protein family, member 3	gamete generation
AK040987	intergenic	up	N/A	N/A	chr4	-	44537628	44539061	NM_008782	Pax5	Paired box gene 5	spermatogenesis
AK076894	intergenic	up	N/A	N/A	chr14	+	71651090	71670858	NM_207636	Fndc3a	Fibronectin type III domain containing 3A	male gonad development; gamete generation
AK085973	intergenic	down	N/A	N/A	chr7	-	19926316	19927864	NM_007948	Ercc1	Excision repair cross complementing group 1	germ cell development; spermatogenesis;male gonad development
AK087769	intergenic	down	N/A	N/A	chrX	+	95344107	95344738	NM_013476	Ar	Androgen receptor	male gonad development
AK131796	intergenic	up	up	positive	chr19	+	56896451	56897029	NM_001002238	Tdrd1	Tudor domain containing 1	germ cell development
AK132559	intergenic	up	down	negative	chr4	-	136714997	136720981	NM_009523	Wnt4	wingless-related MMTV integration site 4	male gonad development; gamete generation
AK135688	intergenic	up	down	negative	chrX	+	58264868	58329243	NM_009237	Sox3	SRY-box containing gene 3	gamete generation
AK140089	intergenic	up	down	negative	chr9	+	46721685	46730650	NM_207675	Cadm1	Cell adhesion molecule 1	spermatogenesis
AK162901	intergenic	down	up	negative	chrX	+	95515514	95518551	NM_080468	Rxfp2	Relaxin receptor 2	male gonad development
AK163488	intergenic	up	down	negative	chrX	+	58369560	58392635	NM_009237	Sox3	SRY-box containing gene 3	gamete generation
AY512909	intergenic	down	down	positive	chrX	+	57736773	58061168	NM_009237	Sox3	SRY-box containing gene 3	gamete generation
BC006965	intergenic	down	down	positive	chr11	-	112548956	112572655	NM_011448	Sox9	SRY-box containing gene 9	male gonad development
BC061253	intergenic	down	up	negative	chr9	+	27156583	27158793	NM_029299	Spata19	Spermatogenesis-associated protein 19, mitochondrial	spermatogenesis
BC084590	intergenic	down	down	positive	chrX	+	91213997	91220809	NM_001044386	Zfx	Zinc finger X-chromosomal protein	spermatogenesis
BC100504	intergenic	up	up	positive	chr1	+	73071184	73072075	NM_009407	Tnp1	Spermatid nuclear transition protein 1	gamete generation
NR_003646	intergenic	up	down	negative	chrX	+	123928824	123930430	NM_172493	Diap2	diaphanous homolog 2 (Drosophila)	gamete generation
AK006377	exonic sense	up	up	positive	chr16	-	10796421	10796916	NM_013637	Prm1	Protamine 1	spermatogenesis
AK015262	exonic sense	up	up	positive	chr1	+	167415323	167419679	NM_173029	Adcy10	Adenylate cyclase 10	spermatogenesis
AK033270	exonic sense	down	N/A	N/A	chr10	-	5674656	5734545	NM_007956	Esr1	Estrogen receptor	male gonad development
AK047175	exonic sense	down	down	positive	chr5	+	76045217	76048321	NM_001122733	Kit	kit oncogene	gamete generation
AK011429	exonic sense	down	down	positive	chr6	-	127075183	127075994	NM_009829	Ccnd2	cyclin D2	germ cell development
AK135056	exonic sense	down	down	positive	chr11	-	51807068	51810930	NM_009458	Ube2b	Ubiquitin-conjugating enzyme E2 B	gamete generation
AK138562	exonic sense	up	up	positive	chr18	-	34717296	34738421	NM_080637	Nme5	Non-metastatic cells 5	gamete generation
AK142380	exonic sense	up	up	positive	chr2	-	121218366	121235942	NM_153075	Catsper2	Cation channel, sperm associated 2	spermatogenesis
AK015852	exonic antisense	up	up	positive	chr3	+	102739371	102740221	NM_011516	Sycp1	Synaptonemal complex protein 1	gamete generation
AK016196	exonic antisense	up	N/A	N/A	chr11	-	26286743	26287433	NM_025923	Fancl	Fanconi anemia, complementation group L	gamete generation
AK019057	exonic antisense	up	N/A	N/A	chr5	-	91480896	91503799	NM_007950	Ereg	epiregulin	gamete generation
AK047496	exonic antisense	down	up	negative	chr1	-	167446804	167448616	NM_173029	Adcy10	Adenylate cyclase type 10	spermatogenesis
AK077193	exonic antisense	up	up	positive	chr2	+	178141974	178143997	NM_177191	Sycp2	Synaptonemal complex protein 2	gamete generation
AK134149	exonic antisense	up	down	negative	chr15	+	98723783	98725606	NM_007857	Dhh	Desert hedgehog	male gonad development; gamete generation
AK138592	exonic antisense	up	N/A	N/A	chr5	-	23872009	23889400	NM_008713	Nos3	Nitric oxide synthase, endothelial	gamete generation
BC023886	exonic antisense	up	down	negative	chr2	+	26301474	26313515	NM_008714	Notch1	Notch gene homolog 1 (Drosophila)	spermatogenesis
DQ072380	exonic antisense	up	up	positive	chr16	+	10791151	10798155	NM_013637	Prm1	Protamine 1	spermatogenesis
DQ072382	exonic antisense	up	up	positive	chr16	+	10792080	10798155	NM_008933	Prm2	Protamine 2	spermatogenesis
AK007900	bidirectional	up	up	positive	chr19	+	5561051	5561679	NM_019935	Ovol1	OVO homolog-like 1 (Drosophila)	spermatogenesis
AK015206	bidirectional	up	up	positive	chr12	-	77503743	77504641	NM_008301	Hspa2	Heat shock protein 2	gamete generation
AK016105	bidirectional	up	up	positive	chr5	-	129241234	129241904	NM_021311	Piwil1	Piwi-like homolog 1 (Drosophila)	gamete generation
AK019618	bidirectional	up	up	positive	chr11	-	30671292	30671674	NM_134013	Psme4	Proteasome activator subunit 4	spermatogenesis
AK019623	bidirectional	up	up	positive	chr13	-	55877307	55885840	NM_029772	Catsper3	Cation channel, sperm associated 3	spermatogenesis
AK020166	bidirectional	up	up	positive	chr12	-	77503737	77504969	NM_001002012	Hspa2	Heat shock protein 2	gamete generation
AK044604	bidirectional	up	down	negative	chr10	+	62801950	62803661	NM_019812	Sirt1	Sirtuin 1(S. cerevisiae)	spermatogenesis
AK160141	bidirectional	up	N/A	N/A	chr16	-	33379940	33380813	NM_011749	Zfp148	Zinc finger protein 148	gamete generation
AK161816	bidirectional	up	down	negative	chr2	+	58419793	58588068	NM_001110205	Acvr1	Activin A receptor, type 1	germ cell development
