# Supplementary material for: Long Non-Coding RNA Expression Profiling of Mouse Testis during Postnatal Development
Source: PLoS One. 2013 Oct 10;8(10):e75750. doi: 10.1371/journal.pone.0075750 (PMC3794988; doi:10.1371/journal.pone.0075750)
Supplement: Table S10 — Epigentic status in promoter of differentially expressed lncRNAs in adult testis. (XLS) [file pone.0075750.s013.xls]

## Sheet: Total 
Gene Symbol	SeqID	Classfication	CpG O/E	H3K4me3(Score)	H3K27me3(Score)
	BC100504			127	0
	AK018942			239	217
AK015428	uc007vys			0	0
	BC049745			129	0
AK006831	uc007hbx	HGC	0.7	219	0
BC050982	uc009gzw			187	0
AK131719	uc008vov			180	0
AK005780	uc008cye			238	0
AK076728	uc007zkk			166	0
	AK005929			0	0
AK006052	uc009aym			113	0
	AK006669			108	246
AK006024	uc007sdp			0	0
AK076952	uc009gzv			232	0
1700013N18Rik	NR_003639			207	0
AK006852	uc008igz			106	0
AK005838	uc007zqm			185	0
	AK018981			179	0
AK006752	uc007jyo	HGC	0.75	224	0
1700123L14Rik	NR_003643			222	0
AK017048	uc008vyo			155	0
AK016172	uc008wlp			0	0
AK005912	uc007mef			159	0
	AK006844			142	0
AK006633	uc007ejk			122	0
BC049706	uc007ejl			136	0
BC099582	uc008xlx			130	0
AK006653	uc009vft			0	0
AK005643	uc007baq			119	0
	AK018932			206	0
AK006470(Scgb2b1-ps)	uc009gil			137	0
	AK034299	HGC	0.82	174	172
AK016605	uc007yja			160	0
AK076805	uc007cgb			207	0
	AK076832			114	0
	BC048565			161	0
EG545936	uc009fqn			200	0
	AK016723			159	0
BC048628	uc007atp			140	0
AK006389	uc007zke			172	0
	AK006530	HGC	0.93	299	0
	AK007098			0	0
AK006412	uc009dqq			211	0
AK018902	uc008zrz			218	0
	AK076915			0	0
AK005653	uc007fbl			114	0
	AK076741			0	0
AK016427	uc007nsv			113	0
	AK006660			153	0
AK006507	uc007dit			0	0
	AK007144	HGC	0.84	0	0
	AK006406			130	0
AK076897	uc009nkt			184	0
AK015482	uc008tlv			186	0
	BC055113			127	0
Aldoart2	NR_003959			174	0
BC050972	uc009qfh			208	0
	AK015139			149	0
AK007110	uc007mza			237	0
	AK015330			0	0
AK007100	uc007rsc			136	0
	AK006169			137	0
AK007102	uc007rcu			117	0
AK076930	uc008ygq			179	0
	AK005964			125	0
AK006725	uc008zru			144	0
	AK006618			162	0
AK018976	uc008hip			165	0
AK015844	uc008wmv			117	0
AK005639	uc008rft			110	0
	AK076893	HGC	1.05	268	0
AK006376	uc008mmu			182	0
Gm5334	NR_003648			169	0
AK019561	uc007hen			177	0
AK076963	uc009avw			123	0
AK019797	uc007zsu			152	0
AK077115	uc007zsa			168	0
AK007249	uc009kuf	HGC	0.9	182	0
AK006991	uc007rcs			178	0
	AK006377			0	0
Gm1604	uc008aiu			0	0
	AK015829	HGC	0.99	235	0
BC049642	uc008wtg			183	0
AK007238	uc008ahx			171	0
	AK007287			0	0
AK018974	uc007obk			129	0
	AK019660			0	0
BC049717	uc008och			128	0
	AK019586			108	0
AK005634	uc007knx			120	0
	AK016056			182	0
AK006039	uc008dkd			0	0
AK007216	uc009kea			117	0
	BC049716			103	0
AK019699	uc007srg			0	0
DQ284430	uc008fqj			109	0
AK016281	uc008zrx			108	0
AK076884	uc009ueo			0	0
AK076946	uc007fkm			0	0
AK006895	uc007edr			146	0
	AK018927	HGC	0.76	243	0
AK014999	uc009rdf			170	0
AK077183	uc008fud			214	0
AK016131	uc007nku	HGC	1.01	237	0
	AK005715			0	0
	AK015550			137	0
	AK016045			0	0
AK006202	uc008zgx			120	0
AK006812	uc008ytp			165	0
	AK006765			159	0
AK007084	uc008vke			258	0
AK006121	uc009awo			191	0
	AK006982			127	0
AK076692	uc008wmu			117	0
	AK007128			131	0
AK076909	uc008hbp			128	0
AK006933	uc008cph			183	0
Ube2dnl	NR_003645			106	0
BC048585	uc007lpo			215	0
	AK016091			129	0
AK006870	uc009qvr			117	0
AK029663	uc008kcx			220	0
AK019722	uc007ify			218	0
AK006167	uc009qow			189	0
AK015183	uc009rea			205	0
AK006896	uc009cjn			0	0
	AK005899			131	0
	AK015479			171	0
	AK006593			121	0
	AK015838			166	0
	AK007300			134	0
AK006610	uc008hnr			120	0
	AK015238			225	0
	AK015494			110	0
	AK019708			209	0
AK006531	uc008nfy			131	0
	AK030044			175	0
AK016244	uc007aou			222	0
AK006512	uc007qgq			108	0
	AK007108	HGC	0.95	191	0
AK006563	uc008fvy			0	0
AK006644	uc007ude			169	0
	AK019648			205	0
	AK006832			182	0
AK016926	uc008wso			159	0
	AK014881			103	0
	AK006983			113	0
	AK015977			155	0
	AK014973			0	0
AK029641	uc009cea			0	0
	AK007034			170	0
AK006310	uc008lmt			138	0
	AK076940			184	0
	AK017073			115	0
	AK016610			195	0
AK018858	uc008hwh			228	0
AK007223	uc008vwe			196	0
AK076851	uc007vwv			166	0
	AK006482			133	0
	AK015499			0	0
4921511C20Rik	NR_003646			0	0
AK161354	uc008vsf			0	0
AK006766	uc008pcg			136	0
	AK015101			0	0
	AK006615			0	0
	AK006720	HGC	1.11	220	0
AK006996	uc007vyv			115	0
4930488L21Rik	NR_026888	HGC	0.93	198	0
BC098228	uc007hfc			237	0
AK006540	uc009dkx			120	0
AK016162	uc008qtk			202	0
AK007025	uc008fvz			141	0
AK018948	uc008xvs			0	0
AK076916	uc007hff			163	0
	AK019553			168	0
	AK018844			142	0
	AK006151			111	0
	AK006818	HGC	0.81	322	0
AK005811	uc008oeh			219	0
	AK006712			484	0
	AK015779			109	0
1700020N18Rik	NR_026924			196	0
AK016078	uc007djs			164	0
	AK015998			165	0
AK019711	uc007ztc			117	0
	AK015455			111	0
	AK015632			106	0
AK076902	uc008wnt			130	0
	AK006238			0	0
	AK016161			287	272
	AK005916			119	0
	AK016768			0	0
AK133139	uc009hqx			225	0
	AK015163			135	0
AK016243	uc009jad			117	0
	AK016211			155	0
AK076759	uc008rde			150	235
AK019630	uc007ifx			218	0
AK076702	uc007uro			263	0
AK006701	uc007ibh			254	0
AK007185	uc007rdc			101	0
	AK006696			0	0
	AK015830			113	0
	AK016331			108	0
	AK006266	HGC	1.19	182	0
AK015610	uc008rtv			0	0
AK007149	uc007uft			153	0
	AK005844			166	0
AK015236	uc007sap			0	0
	AK019755			0	0
	AK016406			228	428
	AK015185			187	0
AK015099	uc007enq			103	0
AK005958	uc007xzn			157	0
	AK019767			127	0
	AK014936			103	0
	AK006751	HGC	0.99	202	0
	AK015232			145	0
AK005607	uc008hwn			143	0
AK007020	uc007nww	HGC	0.92	246	0
	AK006915			180	0
AK007038	uc007uma			174	162
AK015429	uc007uxt			161	206
	BC048633	HGC	0.76	165	206
AK076894	uc007upd			106	0
	AK016189			0	0
	AK016855	HGC	0.91	195	0
AK008572	uc008amm			0	0
	AK006863	HGC	0.98	173	0
	AK015487			136	0
	AK007157			137	0
	AK005995			0	0
AK006451	uc008ysj			133	0
	AK016132			187	0
AK030206	uc008wcc			249	0
AK076979	uc007ovb			0	0
	AK078302	HGC	0.93	266	0
BC048519	uc007vrs			145	0
	AK006385			0	0
AK076840	uc009osk			102	0
Smok4a	uc008amk			194	0
AK006560	uc007nnq			0	0
	AK018837	HGC	0.72	224	0
	AK005648			117	0
	AK077096			160	0
AK006942	uc009dnm			657	0
AK019792	uc009odt			112	0
	AK017000			143	0
	AK006198			139	0
	AK016582	HGC	1.09	202	0
AK015470	uc007quf			138	0
	AK019638			152	0
AK016412	uc007ejd			193	0
AK015940	uc007qcb			132	0
4930579G22Rik	uc008ztq	HGC	0.98	197	0
AK016914	uc009eqr			211	0
	AK077216			222	0
	AK008823			0	0
BC048678	uc008pqo			103	0
	AK016315			0	0
AK076673	uc007hdh			146	278
Slco6d1(AK133206)	uc007cfw			208	0
	AK006735			136	0
	AK005742			151	0
	AK005676			215	0
	AK007234			0	0
	AK006073			298	0
	AK007066			0	0
AK132847	uc008dfb			125	0
	AK019703			0	0
AK016046	uc007fmk			0	0
	AK007211			0	0
	AK014799			0	0
	AK007258			178	0
1700012B09Rik	uc009oex			170	0
BC049735	uc009goz			0	0
AK076711	uc007sqx			125	0
	AK029704			143	0
	AK015069			153	0
	AK016094			162	0
AK007006	uc007uyf			174	0
AK132957	uc009ryo			119	0
AK006947	uc007rzy			0	0
AK016893	uc007aqy			164	0
	AK076878			220	0
AK018937	uc009lkg	HGC	1.15	246	0
AK016549	uc009klt			181	0
	AK006117			108	0
AK007162	uc009ozr			146	0
AK005712	uc007sdq			0	0
	AK030170			155	0
AK132729	uc007qbk	HGC	1	190	0
AK076966	uc007rcg			147	0
AK015955	uc009pjj			188	0
AK015188	uc007hcv			134	0
AK133250	uc008sus			0	0
AK005539	uc009tga			0	0
AK015773	uc007hee			141	0
	AK005792			197	0
	AK006042			120	0
AK131746	uc008bfj			145	0
AK015200	uc008xqg			113	0
AK016511	uc007ugw	HGC	0.8	358	0
	AK015803	HGC	1.04	356	0
1700049L16Rik	NR_003644			180	0
	AK016697			157	0
	AK016753			283	0
AK016630	uc009jib	HGC	1.09	221	0
	BC048639			224	0
AK006031	uc007pjv			273	0
AK016163	uc007zua			154	0
AK019657	uc007gnq			125	0
AK015950	uc007dau			0	0
	AK015580			279	0
	AK016885			151	0
AK016813	uc007itf			157	0
	AK016285			161	0
	AK015098			138	0
	AK006223			167	0
AK006968	uc009hbz			106	0
	AK005945			155	0
AK006934	uc009pwx			145	0
AK005754	uc007jjp			0	0
	AK132715			102	0
	AK006687	HGC	1.26	177	0
AK015376	uc007azt			163	0
	AK015574	HGC	0.86	190	0
AK007305	uc007uyb			142	0
AK015760	uc008ezi			169	0
AK019731	uc007kkw			160	0
	AK007199			107	0
AK015409	uc008rev			132	0
	AK015039			184	0
AK018841	uc009raw			192	0
AK006239	uc007fgf	HGC	0.91	263	0
	AK077042			125	0
4930465K10Rik	uc008frr	HGC	1.03	237	0
AK016399	uc009sdk			186	0
AK016100	uc007ilo			295	0
AK015191	uc008rxd			123	0
	AK016492			117	0
	AK005981			107	0
	BC030462			0	0
AK076783	uc009qzg	HGC	1.08	176	0
AK029878	uc008dvs			132	0
AK144266	uc008keh			163	156
	AK016005			103	0
Speer5-ps1	NR_027506			141	0
	AK017039			135	0
	AK015221			138	0
AK015384	uc007ajk	HGC	0.89	237	0
	AK019653			185	0
	AK015556			145	0
	AK007126			177	0
AK017040	uc009qsg	HGC	1.15	221	0
AK076790	uc007ngy			147	0
AK019838	uc009scs			155	0
AK015105	uc008qqt			188	0
	AK015154			131	0
	AK016087			0	0
	AK007286	HGC	1.05	181	0
	AK019814			134	0
	AK029639			146	0
	AK015626	HGC	0.96	194	0
AK076905	uc009vgq			0	0
Speer5-ps1	NR_001582			122	0
AK029624	uc009lrj			161	0
mKIAA1317	uc008eth			111	0
	AK019742			139	0
	AK015908			218	0
	AK051554			0	0
	AK016880			125	0
	AK016245			171	0
	AK017082			155	0
	AK006520			107	0
AK019804	uc007wnq			144	0
AK019737	uc009keb			120	0
AK006138	uc007xer			181	0
	AK016030			165	0
AK019604	uc008kgk			162	0
AK015463	uc007xzo			0	0
	AK006559			123	0
	AK005598			0	0
	AK016680			166	0
AK018891	uc007lvm			142	0
AK019723	uc007tjg			0	0
AK015347	uc007cew			0	0
BC049653	uc009gor			166	0
AK016444	uc008hij			192	0
	AK133239			183	0
AK028088	uc007vcl			0	0
	AK015090	HGC	1.13	195	145
Tspy-ps	AJ001379			121	0
	AK016098			114	0
AK015749	uc008mqa			0	0
AK006076	uc007pzl			129	0
AK015892	uc009rxe			114	0
	AK076995			116	0
	AK006624			112	176
BC052364	uc008win			158	0
Tspy-ps	NR_027507			121	0
	AK006857			128	0
AK077008	uc007qvc			0	0
	AK007229			103	0
BC048601	uc007qcv			127	0
AK006348	uc009jnu			192	0
AK015072	uc007zlj			137	0
	AK016851			176	0
	AK015082			0	0
	AK006850			0	0
	BC048001			155	171
	AK016136			126	0
AK015444	uc007uth			269	0
AK133007	uc008edz			147	0
	AK019811			103	0
	AK016867			0	0
AK076665	uc008orn			0	0
mKIAA1317	uc008etg			111	0
	AK019622			250	0
	AK019813			157	0
	AK015432			0	0
AK019698	uc007dxz			123	0
AK016284	uc007sri			116	0
	AK014831	HGC	1.07	601	0
	AK006707			149	0
	AK015252			141	0
AK005677	uc007run			167	0
	AK132914	HGC	0.99	249	0
	AK019783	HGC	1.11	276	176
AK076660	uc007cvd			144	0
	AK005917			154	0
AK015379	uc007emy			166	0
	AK018904			191	0
	AK015793			0	0
AK007073	uc008fuj			150	0
Morn3	uc008zmz			153	0
AK006485	uc008xlw			122	0
	AK007183			0	0
	AK005997			109	0
DQ072382	uc007yei			0	0
AK131781	uc007xij			0	0
	AK018872			144	0
	AK015266			115	0
AK015818	uc007uvj			0	0
	AK019587			0	0
	AK016024	HGC	0.92	218	0
	AK016793			386	0
AK006037	uc007eyj	HGC	0.92	182	0
	AK007284			133	0
	AK006845			167	0
	AK015119			226	0
AK006186	uc008nen			175	0
	AK006360			163	0
	AK006091	HGC	0.82	224	0
AK005635	uc009pfq			118	0
	AK005755			129	0
AK016361	uc009dci			0	0
	AK018915			111	0
AK006894	uc009bis			118	0
AK015227	uc007srh			0	0
AK076984	uc008ehr			0	0
	AK015323			0	0
AK016686	uc007see			0	0
AK016948	uc007iga			0	0
AK016016	uc008ezf			207	0
AK015969	uc008lwz	HGC	0.92	254	0
	AK015366			256	0
AK015562	uc008mje	HGC	0.88	165	0
AK019704	uc008ehv			0	0
	AK015262			295	0
	AK006325			143	0
AK038423	uc007azi	HGC	0.89	228	0
	AK015596			125	0
	AK016745			117	0
	AK019828			0	0
	AK006729			171	0
AK016178	uc007puv			152	0
AK006022	uc008lxa	HGC	0.92	254	0
	AK015510			147	0
AK029630	uc007dak			142	0
	AK019859			135	129
AK007204	uc008dvj			162	0
	AK016439			174	0
	AK016333			188	0
	AK077189			221	179
	AK014901			224	0
BC049685	uc007tbw			128	0
	AK006914			222	0
	AK019800			106	0
AK006921	uc008rpz			0	0
AK019710	uc008lqo			103	0
	AK006843			130	0
AK155560	uc009cwf			0	0
	AK019572			137	0
AK029633	uc008paf			104	0
1700073E17Rik	NR_003625			159	0
	AK006590			132	0
	AK131705	HGC	0.87	200	162
AK005578	uc009jnt			192	0
	AK016503	HGC	0.87	166	0
	BC048591			123	0
	AK019616			0	0
AK132829	uc008rbl			0	0
	AK016494			164	0
AK019772	uc009dta	HGC	0.9	312	0
AK017125	uc007dqr			124	0
AK016120	uc008gys			163	0
	AK131727	HGC	1.17	174	0
AK006051	uc007kde	HGC	0.84	124	0
AK029646	uc007vkw			0	0
	BC048567	HGC	1.06	230	0
AK076655	uc007ikz			158	0
	AK015114			166	0
	AK005751			153	0
	AK029760			165	0
AK006595	uc007eda			250	0
	AK006012			224	0
	AK006764	HGC	1.01	205	0
AK131804	uc007zfx	HGC	0.84	203	0
	AK015201			129	0
AK015615	uc007wwf	HGC	0.84	264	0
BC042407	uc009jhc			0	0
	AK006032	HGC	0.85	322	0
	AK021347	HGC	1.43	129	0
	AK016950			309	0
	AK015361			0	0
AK076925	uc007ecz	HGC	1.02	0	0
AK076911	uc008itk			0	0
AK076935	uc008jor			127	0
BC100523	uc009cxn			0	0
AK006581	uc008sme			0	0
	AK015964			0	0
AK005363	uc008wsp			0	0
AK015363	uc008mzn			0	0
	AK016410			0	0
AK006884	uc007osa	HGC	1.05	165	0
AK015118	uc008osz			107	0
AK015520	uc007rxq			130	0
	AK006846			0	0
	AK007033			0	0
AK015174	uc009orc			197	0
	AK006908			0	0
AK015324	uc008xiw			0	0
	AK019673			0	0
	AK019750			300	0
	AK016703			187	0
	AK080546	HGC	0.79	243	193
	AK017091			156	0
AK019626	uc008ajz			156	0
AK086943	uc009plm			0	0
AK019623	uc007qsa			159	0
	AK006436			183	0
	AK006354			150	0
	AK006278	HGC	0.91	207	0
	AK076933			117	0
	AK015691			102	0
	AK015344	HGC	0.7	162	0
AK046160	uc007fed			122	0
	AK006851			122	0
	AK006317	HGC	0.87	180	0
AK133038	uc007zrd			163	0
	AK014914			339	0
	AK006126			254	0
	AK030176			135	0
	AK017042			170	0
	AK017121			156	190
AK006623	uc009ogl			0	0
	AK015194			169	0
	AK015186			158	0
	AK015485			0	0
AK079713	uc007oth			0	0
AK132743	uc008hof			0	0
AK016961	uc008shn			117	0
AK007137	uc009jyh			164	0
AK005722	uc007jeq			242	0
	AK131796	HGC	1.07	261	0
AK018866	uc008uqr			145	0
	AK005733			138	0
	AK015532	HGC	0.96	236	0
	AK007010	HGC	0.88	311	0
	AK015258			101	0
AK037571	uc009duh			213	0
	AK016564			113	0
	AK014052			0	0
AK016650	uc009glf			106	0
AK019745	uc008vsx			0	0
AK016040	uc007rxr			130	0
	AK015588	HGC	0.89	180	0
AK006923	uc008yyk			317	0
	AK006995	HGC	1.04	160	159
	AK135931			0	0
	AK015091			102	0
AK040173	uc008xau	HGC	1	189	0
AK048032	uc009tvj			0	0
	AK006649			308	198
Ccdc37(AK021139)	uc009cxi			251	192
Rpgrip1(AK039097)	uc007toq			0	0
AK132720	uc007ifd	HGC	0.93	299	0
	AK005961			196	0
AK052226	uc007ayw			0	0
	AK015226			176	0
	AK015235			114	0
	AK005901			130	0
	AK086441	HGC	0.93	197	0
	AK020986			236	0
	AK006716			107	0
AK019781	uc009nol			147	0
AK015306	uc009oao	HGC	0.86	229	0
	AK015853			114	0
AK006909	uc008eze			207	0
AK007260	uc008ryu			205	0
	AK006868			0	0
	AK015112			166	0
AK005839	uc008qyp	HGC	0.99	221	0
4930474M22Rik	uc008amz			128	0
Nme5(AK138562)	uc008ekr			196	0
	AK015876			0	0
	AK016822			141	0
AK077070	uc008gzi			135	0
	AK030245			121	0
	AK006604			0	0
AK131825	uc009ctt			0	0
AK161406	uc007kit	HGC	1.1	212	0
	AK019843			117	0
DQ874391	uc009vfl			0	0
AK076937	uc009pln			159	0
	AK015577			145	0
	AK019831			205	0
AK015336	uc007ukz			124	0
	AK006847			0	0
	AK006998			100	0
	AK076870			125	0
1700057G04Rik	uc009rap			0	0
	AK015085			145	0
	AK015405			263	0
	AK015449			124	0
	AK015131			217	249
	AK015419			0	0
	AK016095			119	0
AK014882	uc007hfg			163	0
AK006355	uc009gyl	HGC	0.85	137	129
	AK015173			105	0
	AK006476			170	244
AK076809	uc008eht			0	0
AK016430	uc008xve			177	0
	AK029496			0	0
AK015741	uc009lwi			132	0
	AK006648	HGC	0.83	157	0
	AK015026			0	0
AK016265	uc008ruy	HGC	0.82	166	0
AK076685	uc009cbi			231	0
	AK017046			225	0
	AK019768			148	0
	AK016760			180	0
	AK016105	HGC	0.63	194	0
AK007214	uc008fpq			128	0
	AK005857			0	0
	AK017043			136	0
AK146160	uc009qui	HGC	0.86	186	0
DQ072380	uc007yeg			0	0
AK080399	uc007bol			0	0
	AK006663			124	0
AK015607	uc007uyg			174	0
	AK005966			0	0
	AK016423			109	0
	AK015343			175	0
AK076849	uc009idi	HGC	0.85	206	148
AK015814	uc007qtp			175	0
AK133807	uc008yig	HGC	0.73	167	120
	AK133346			237	0
Speer9-ps1	NR_001583			140	0
	AK015216			157	0
	AK007306			250	0
	AK076703			128	0
	AK016220			171	0
AK006465	uc008ppk			104	0
	AK016418			155	0
	AK016486	HGC	0.89	185	0
AK018988	uc009otz	HGC	0.97	204	0
	AK015674			111	0
AK015373	uc008kjz			117	0
AK139678	uc007zqv			0	0
	AK019718	HGC	0.86	319	0
	AK006740			152	0
	AK015230			202	0
AK006196	uc007wfq	HGC	0.91	239	0
	AK006067			194	0
	AK077006			113	0
AK006486	uc008nbr			0	0
AK160416	uc008dfm			152	0
AK006331	uc007mfh			157	0
	AK019567			115	0
AK018913	uc007svs			132	0
	AK006853			115	0
	AK016182			0	0
	AK006936			165	0
	AK014935	HGC	0.9	286	0
	AK006345	HGC	0.99	255	0
AK081945	uc007nrj			0	0
AK082307	uc007zts			0	0
AK029795	uc007ffi			136	0
4930448K20Rik	NR_004448			129	0
	AK086661	HGC	0.93	197	0
	AK005685			112	0
	AK017129			0	0
	AK020357			167	0
	AK018898			112	0
	AK005737	HGC	0.84	239	0
	AK131883			0	0
	AK005466			0	0
AK014969	uc007qms			156	0
AK132076	uc007pwy			0	0
AK076658	uc008ehs			0	0
AK016077	uc008fmz	HGC	0.89	206	0
AK019593	uc007uuk			0	0
AK005649	uc007yfu			176	0
AK076918	uc008xir			123	0
	AK007236			0	0
	AK015281			121	0
AK047804	uc007dxy			0	0
	AK016843			131	0
AK019801	uc007shy			0	0
	AK005124	HGC	0.79	169	0
AK006426	uc009ots			0	0
	AK006053			122	0
AK005629	uc007rct			178	0
AK077064	uc009vhq			0	0
	AK160417			112	0
	AK015589			0	0
AK006664	uc008zlk			163	0
	AK015192			0	0
	AK015551			113	0
AK007095	uc009mqu			106	0
	AK007037			212	0
AK007082	uc009jdo	HGC	0.89	242	0
	AK006698	HGC	1.14	227	0
AK006191	uc007zwy	HGC	0.93	210	0
AK016393	uc008paw			160	0
	AK018992			140	0
	AK018939	HGC	0.8	199	0
	AK015554			226	0
	AK018958			0	0
	AK005735			0	0
	AK083519			315	0
	AK016607			109	0
AK006474	uc008oci			290	0
	AK006783			106	0
	AK044736			0	0
AK019680	uc007xcp			155	0
	AK016981	HGC	1.17	223	0
AK132898	uc009fiw			0	0
AK145231	uc008njn	HGC	1	223	0
	AK016983			134	0
AK015999	uc008rlm	HGC	0.95	316	0
	AK050221			0	0
AK006045	uc007eln	HGC	1	285	0
AB080658	uc008msv			118	190
AK019709	uc009axe			152	0
AK006231	uc007vqn			112	0
AK019573	uc007fko			119	0
	AK015575			0	0
AK015413	uc007nbp			160	0
AK133228	uc007vdl			145	0
Tcte2	AK005879	HGC	1.11	237	0
	AK005673	HGC	1.15	271	0
	AK133065			153	0
	AK006813			0	0
Gnao1(AK160434)	uc009mvj	HGC	0.85	198	0
BC048579	uc009nyh			437	0
AK007041	uc007pwz			244	0
AK016386	uc008fue			214	0
AK077035	uc008fvx			141	0
AK016192	uc007ddy			128	0
	AK016392			115	0
	AK015801	HGC	1.11	176	0
AK007290	uc008xoq			116	0
	AK005637			0	0
	AK016816			112	0
	AK015579	HGC	0.98	191	0
	AK019721	HGC	0.83	363	0
	AK016323			0	0
AK018946	uc007kqq			110	0
AK030448	uc008wpt			252	0
	AK080629			224	0
	AK133004			233	0
AK005987	uc008rtx			204	0
AK007274	uc009rsq			213	0
AK015051	uc007gyb			230	0
AK015279	uc007tgb			153	0
	AK016082			0	0
AK131776	uc007nmk			129	0
	AK016458	HGC	0.95	260	0
AK005679	uc007nwx			100	0
	AK133257			219	0
	AK006898			107	0
AK133010	uc008syd			197	0
	AK015676			126	0
AK076914	uc007phy			0	0
	AK017041			0	0
	AK007220			107	0
	AK005835	HGC	1.02	210	0
	AK015237	HGC	1.29	386	0
AK076987	uc008rvd	HGC	0.99	220	0
AK005951	uc007jff			247	0
	AK017377	HGC	1.02	184	0
	AK007124			106	0
	AK017099	HGC	0.99	243	0
1700129I04Rik	uc009idd	HGC	0.88	251	0
EG545391	uc007duw	HGC	0.78	0	0
	AK015943	HGC	1.07	215	0
AK015664	uc007zre			109	0
AK076947	uc007uiz			133	0
	AK006312			102	0
AK016028	uc009jhd			158	0
AK135688	uc009tig			0	0
	AK006156			160	0
AK019789	uc007zqx			158	0
	AK015287			128	0
	AK005763	HGC	1.14	171	0
	AK006821			102	0
	AK019659			121	0
AK007460	uc009lda	HGC	0.98	208	0
	AK017062			252	0
AK132929	uc008ehu			134	0
AK019836	uc008oht			150	0
AK011222	uc008dte			186	0
	AK007040			0	0
	AK045655			0	0
	AK016330			132	0
	AK006305			138	0
AK039347	uc008sdd	HGC	1.05	446	0
	AK019606			118	0
AK077163	uc009msd			216	203
	AK076684			102	0
	BC048603			138	0
	AK015456			101	0
BC048584	uc009pah			173	0
	AK015821			170	0
AK016332	uc009nyg			437	0
	AK030101			133	0
AK006380	uc009mce			0	0
AK029875	uc009mcf			0	0
1700037C18Rik	uc007xyx	HGC	0.72	224	0
AK006980	uc009nbb			0	0
	AK029564			0	0
AK132084	uc008pdl			0	0
AK006293	uc007vbx			153	0
AK015900	uc007qpo			188	0
	AK018667	HGC	0.87	102	147
AK015944	uc007gyt			126	0
	AK018857	HGC	0.9	203	0
	AK006785			0	0
	AK020290			139	0
	AK044555			156	0
AK029768	uc007qeb			119	0
	AK015656	HGC	0.78	247	0
AK006308	uc009bsg			0	0
AK007151	uc007tcc			153	0
AK019541	uc007jjw			0	0
	AK015128			128	0
AK015937	uc007utz			153	0
AK020829	uc009ngb			135	0
	AK015849			0	0
	S49663			118	0
AK040104	uc007vyr			0	0
	AK019668			0	0
Serf1	uc007rqe	HGC	1.02	284	0
AK015488	uc008qmt			0	0
AK015408	uc007qbc			136	0
AK161337	uc009fxb			140	0
AK016007	uc009dfe			213	0
AK076949	uc008zhc			0	0
	AK016472	HGC	0.73	308	0
	AK131761			437	0
BC048761	uc009mmp			176	0
AK030268	uc007bys			118	0
	AK016124			107	0
	AK014883			137	0
	AK019635			122	0
	AK016698			309	0
	AK015862			0	0
	AK006261	HGC	0.82	153	0
mKIAA0998	uc007ohm	HGC	0.99	0	0
AK015079	uc007nuu			155	0
	AK005683	HGC	0.84	119	0
AK005580	uc009lty			159	0
	AK006404	HGC	1.11	149	0
	AK015296			201	0
	AK006550			205	0
	AK019707			0	0
AK076672	uc009qwk			143	0
	AK014930			167	162
AK079798	uc008etf			0	0
AK133391	uc009gxl	HGC	0.93	198	0
AK076929	uc007eej			127	0
	AK006948	HGC	0.8	230	0
	AK019761			0	0
AK015475	uc007slx			102	0
AK006245	uc008xnz	HGC	1.1	240	0
	AK077207			309	0
	AK016127			153	0
	AK015106	HGC	1.13	154	0
AK019798	uc008ybx			153	0
	AK007213			141	0
	AK007219			114	0
AK077175	uc009qzb	HGC	1	0	0
AK005744	uc007dzu			202	0
AK147860	uc009mzf	HGC	0.92	197	0
	AK016899			0	0
AK015198	uc007tju			156	0
	AK015850	HGC	1.38	186	0
	AK133453			244	0
	AK016736			159	0
	AK016174			0	0
	AK132855	HGC	0.91	181	0
	AK079918	HGC	1.09	224	0
AK021127	uc007kvt	HGC	0.94	166	162
	AK015294			179	0
AK015004	uc007nub	HGC	0.85	225	0
	AK018878			117	0
	AK015693	HGC	1.01	205	0
AK077166	uc009mqw			233	0
	AK016878			134	0
	AK007003	HGC	0.82	219	0
	AK018218			181	0
1700020N01Rik	uc007eos			215	0
AK015566	uc007ojx			129	0
	AK033866	HGC	0.85	170	162
AK014951	uc009rnw			0	0
AK076389	uc008irj	HGC	0.82	141	0
CKLF6	uc009nae	HGC	0.83	247	0
AK015891	uc009qzq			155	0
AK076847	uc007uqj			134	0
	AK006966			104	0
	AK015300			120	0
	AK085581	HGC	0.87	243	0
	AK015465			127	162
AK005757	uc009eth	HGC	1.06	310	0
AK131678	uc008kcr			0	0
4933409K07Rik	uc008ski			0	0
AK005591	uc007ukb	HGC	0.86	186	0
	AK005750			257	0
AK005600	uc008wti			183	0
	AK041587			0	0
	AK015189			0	0
AK007030	uc007bza			143	0
AK076583	uc008jep	HGC	1.06	249	0
	AK019716			138	0
AK020205	uc008thh			0	0
	AK005985			0	0
4930479M11Rik	uc009gfv			196	0
Gprc2a-rs5	NR_004441			142	0
	AK006795			159	0
BC048612	uc008rva	HGC	0.82	166	0
	AK015372			0	0
	BC048582			100	0
	AK007113	HGC	1.22	179	0
	AK015985	HGC	0.96	243	0
	AK017133			207	0
	AK016122			0	0
	AK042044			0	0
AK005667	uc009ijo	HGC	0.92	149	0
	L09047			0	0
	AK015352			121	0
	AK016397	HGC	1.05	229	0
	AK015636			186	0
AK007092	uc007mcb			152	0
AK016345	uc008mbl			110	0
	AK016142			112	0
AK015792	uc007srs			141	0
AK086288	uc007njj			0	0
AK078103	uc007zhj			0	0
	AK009506	HGC	0.99	189	138
	AK030945			0	0
AK039104	uc007lxk	HGC	0.93	134	0
	AK015812			156	0
	AK016096			102	0
AK085818	uc007nwl			0	0
AK132982	uc007vih			126	0
AK019643	uc008uuw			164	0
AK014841	uc007izb			126	0
	AK006015			277	0
AK076796	uc008rnz			0	0
	AK012985			0	0
	AK131765	HGC	1.04	184	0
AK017104	uc008tgd			189	0
	AK029296	HGC	0.9	242	0
AK015560	uc007vxp			210	0
AK019751	uc008aew			107	0
AK016734	uc008xrt			122	0
AK133035	uc007jkk			172	0
	AK005595			229	0
	AK005767			131	0
AK131821	uc008tiy	HGC	1.05	156	0
	AK019615	HGC	0.86	249	0
	AK005986	HGC	0.93	204	0
	AK131672	HGC	1.26	330	0
	AK132899	HGC	1.05	255	0
	AK015459			184	0
AK016836	uc007rcr			133	0
Dia2(AK006102)	uc007uuc			117	0
	AK015398			142	0
	AK019651			242	0
AK006677	uc008urz			0	0
	AK015448			172	0
	AK016706	HGC	1.17	276	0
AK079709	uc009cff			186	0
AK076827	uc009bla			106	0
	AK015113			118	0
AK006930	uc008xsq			0	0
	AK016304			132	0
	AK016606			109	0
AK160158	uc007zzn			0	0
	AK015032			0	0
	AK019678			0	0
AK076706	uc008mbb	HGC	1.06	263	0
	AK016102			110	0
Ptbp2	uc008rdm	HGC	1.02	225	0
AK076657	uc008fny			115	0
	AK016604			0	0
	AK006872	HGC	0.96	169	0
	AK007026	HGC	0.96	177	0
	AK019765			0	0
	AK015093			121	0
	AK016925	HGC	0.8	153	123
BC099544	uc007uya	HGC	0.61	205	0
	AK041283	HGC	0.8	232	0
AK005657	uc007ryt			111	0
	AK006903			127	0
	AK015621			153	0
AK076722	uc007pbs	HGC	0.87	264	0
	AK015659	HGC	0.94	178	0
AK006561	uc009nru			0	0
AK016693	uc009jia	HGC	1.09	221	0
	AK005768			250	0
4930594C11Rik	NR_024017			136	0
BC048655	uc008xsr			149	0
Smap1	uc007amf			123	0
	AK083834	HGC	0.9	213	0
	AK019602	HGC	1.27	195	0
	AK161422	HGC	0.78	256	0
AK076755	uc008zuz			119	0
	AK030119			0	0
	AK005920	HGC	0.85	186	313
	AK016409	HGC	1.22	262	0
	AK133162			181	0
	AK016576	HGC	0.77	188	0
	AK006142			172	221
	AK052663	HGC	0.85	191	0
AK006572	uc008afq			124	0
AK010245	uc008sxm			0	0
	AK006838			0	0
	AK155508	HGC	0.66	0	0
	AK006237			0	0
DQ691258	uc008nbs			0	0
AK016594	uc009mzw			136	0
2810441K11Rik	uc008gqb	HGC	0.9	242	0
AK006304	uc007qxz			0	0
	AK007207			0	0
AK015493	uc009pwy			141	0
	AK018906			194	0
	AK019842			159	0
	AK016235	HGC	0.75	149	162
AK016580	uc007pwo			484	0
AK015914	uc007tgr			150	0
AK016032	uc009kfa			0	0
	AK017011			0	0
DDO(AK165344)	uc007exc			0	0
AK039020	uc008isw	HGC	0.88	0	0
	AK015637	HGC	0.87	393	0
	AK077098			104	0
	AK015433			113	0
	AK016769			159	0
AK006690	uc007iay			135	0
AK054042	uc007gkp			0	0
	AK017998	HGC	0.92	250	0
	AK015852	HGC	0.86	166	0
	AK019595			0	0
	AK019741			104	0
AK079662	uc008dex			0	0
	L09051			0	0
	AK006976	HGC	1.22	205	0
	AK017098			152	0
AK015818	uc007uvi			158	0
	AK007029	HGC	0.88	271	0
	AK002420	HGC	0.79	322	0
AK016682	uc007nig	HGC	1.11	214	0
Gtpbp2	uc008crv	HGC	0.8	262	0
	AK006417			104	0
	AK005824			0	0
	AK005752			0	0
	AK016653			168	0
	AK007111			345	0
	AK019720			114	0
AK015360	uc007zdf			138	0
AK015628	uc007ozg			309	0
	AK016022			107	0
	AK006047			113	0
	AK019644			0	0
AK016887	uc007lxt	HGC	0.92	0	0
AK014974	uc007nur			113	0
	AK016846			121	0
	AK132795	HGC	0.95	197	0
AK076661	uc009sbl	HGC	1.04	366	0
	AK014826	HGC	0.93	160	0
AK015289	uc007uwz			107	0
AK015703	uc008dfa			125	0
AK002860				107	0
	AK010802			218	0
	AK031079			0	0
	AK006697			103	0
BC100427	uc007rbs			399	0
	AK030377	HGC	1.07	177	0
AK153575	uc007zak			0	0
AK006461	uc007gjx	HGC	0.87	240	0
	AK030060			133	0
	AK016118			285	0
AK006240	uc007nan			168	171
	AK136184			0	0
	AK017066			144	0
	AK016186			158	0
	AK006955			0	0
AK076688	uc009qvk			0	0
	AK040480			0	0
AK082314	uc009kuc			0	0
	AK015994			0	0
AK007154	uc007wnj			175	0
	AK016164			0	0
Mapk10	uc008yjh			138	0
	AK007311			143	0
AK015712	uc009nga			189	0
AK015316	uc007upe			164	0
BC062821	uc008pmf			164	0
AK148282	uc009nxr			0	0
ENSMUSG00000052469	uc008amf			0	0
	AK019763			104	0
	AK019805			102	0
	AK016308	HGC	0.8	172	0
	AK016144			139	0
	AK015326			104	0
	AK019609			0	0
	AB160648			0	0
	AK016126			142	0
	AK019581			282	216
AK087209	uc007anc			0	0
	AK015390			173	0
	AK015283	HGC	1.03	233	0
AK005616	uc008umk	HGC	0.86	171	0
	AK015927			0	0
	AK006928	HGC	1.17	226	0
AK076716	uc008ljh	HGC	0.73	308	0
Ypel1	uc007yjw	HGC	1.07	213	0
	AK015253			123	0
	AK029702			207	0
AK076817	uc008sae			116	0
	AK019571			381	0
	AK004326			0	0
	AK016044			215	0
	AK015660			207	0
	AK015962			222	0
	AK016911	HGC	0.77	247	0
	AK080704			101	0
	AK003944			0	0
	AK032526			0	0
	AK006165			263	0
	AK007160			0	0
	AK007271			250	0
AK005641	uc008sbh			0	0
AK135932	uc007akd			0	0
	AK087434			305	0
Drctnnb1a	uc008wqw	HGC	0.91	196	0
AK016280	uc008eud			152	0
AK017239	uc008jth			0	0
	AK019580			0	0
	AK017132	HGC	1.15	192	0
	AK084991	HGC	0.92	180	0
AK006937	uc007axl			0	0
Rp2h	uc009ssx			210	0
	AK015982	HGC	0.93	286	0
AK005895	uc009bfg			147	0
	AK016992			138	0
	AK016932			183	0
	AK029895			174	0
	AK014875	HGC	0.65	160	0
	AK015278			0	0
	AJ409467			0	0
	AK015140			0	0
	AK131689			132	0
	AK016055			0	0
	AK016962			155	0
	AK082424	HGC	0.94	200	0
	AB047759			215	0
AK016658	uc008xdq			139	0
AK006397	uc009ibe			133	0
	AK015439	HGC	0.8	215	0
AK006730	uc007zyy			113	0
Hdrpa	uc007niz	HGC	1.19	221	0
AK005608	uc007xax	HGC	0.91	208	0
AK052888	uc009azl			111	0
	AK132893	HGC	1.02	240	0
	AK014034			0	0
	AK007099			0	0
	AK016858			0	0
	AK006913			109	0
	AK076721	HGC	1.1	247	0
AK029643	uc007zqp			240	0
AK076845	uc007hha			704	0
AK033819	uc009pll			102	0
	AK039489			0	0
AK029692	uc007gvg			129	0
	AK015514			0	0
	AK006912			137	0
AK015810	uc008ocf			230	0
	AK006665			0	0
AK154225	uc007ybf	HGC	0.83	295	0
AK019620	uc008iaa			136	0
AK076683	uc008iaz	HGC	0.93	200	0
AK005828	uc008oom			105	0
	AK015798			0	0
	AK016735			122	0
AK077682	uc007hip	HGC	0.76	237	0
AK030117	uc009hrh			179	0
TCRB	uc009bnv			0	0
AK138592	uc008wre	HGC	0.77	162	0
	AK015723			0	0
AK005856	uc007qcc			130	0
	AK007127			0	0
AK016372	uc009sdj			186	0
	AK015804			118	0
	AK007172			0	0
	AK015030			144	0
	AK019771			116	0
AK076954	uc009lzq			120	0
	AK006761			199	0
AK050197	uc007nus			0	0
	AK006721			0	0
	AK019696	HGC	0.85	231	0
	AK035884	HGC	0.95	236	0
	AK019618	HGC	1.02	254	0
AK087744	uc007btl			0	315
AK019585	uc009elp			115	0
AK077029	uc009rxc			0	0
AK017111	uc008vss			0	0
AK076906	uc008yik			115	0
	AK161360	HGC	1.11	0	0
AK131742	uc009rha			127	0
	AK161453	HGC	0.92	197	0
	AK006792			118	0
	AK006945			211	0
	AK006390			212	0
AK053994	uc009cjc			119	0
	BC003765	HGC	0.84	244	0
	AK036704	HGC	0.89	215	0
	AK019646			0	0
	AK006865			0	0
AK015421	uc007bfg			103	0
	AK040091	HGC	0.71	142	0
	AK015735	HGC	1.11	291	0
AK029503	uc007els			151	0
	AK016871			119	0
	AK016453			129	0
	AK016405			112	0
AK140089	uc009phk			0	0
AK076734	uc008rjv			118	0
	AK015663	HGC	1.38	186	0
AK012214	uc007qbw			132	345
AK018940	uc008ods			178	0
	AK017892	HGC	0.8	209	0
	AJ409473			0	0
	AK039921			343	0
BC100303	uc007btk			0	315
	AK015386			0	0
AK081104	uc008rsi			142	0
	AK015643			0	0
AK132681	uc007xaz	HGC	0.91	208	0
AK015552	uc008nkw			0	0
	AK008051			257	0
AK015581	uc007hed			0	0
	U72677			0	0
	AK137467	HGC	0.79	168	0
	AK016877			201	0
	AK078013	HGC	0.7	207	0
	AK016287			139	0
AK006943	uc009erm			159	0
	AK002941	HGC	1.26	258	0
	AK016256	HGC	0.98	220	0
	AK006235	HGC	1.09	284	0
	AK019607			136	0
	AK076971			0	0
	AK015759			106	0
	AK015130	HGC	0.95	336	0
	AK016047			0	0
AK014147	uc009pai	HGC	0.74	108	0
AK137133	uc009cnu			0	0
	AK016944			146	0
AK019628	uc007dat			111	0
	AK077193	HGC	0.88	215	0
	AK013501			165	162
AK029959	uc008dvr			132	0
AK076842	uc009eta			139	0
AK076808	uc007diu			185	0
AK082325	uc007xgz			182	0
	AK020967	HGC	0.95	244	0
	AK038433	HGC	1.09	160	0
	AK030270			209	0
	AK006636			114	0
	AK016367			0	0
AK019812	uc008jqx			0	0
	BC039874	HGC	0.64	0	0
	AK016541			129	0
	AK088235	HGC	0.95	260	0
	AK016152			125	0
AK041042	uc009jvm	HGC	0.85	273	0
	AK015794	HGC	0.93	200	0
	AK131677	HGC	0.97	236	0
AK043252	uc007vyl	HGC	0.94	149	0
AK016343	uc009jjs	HGC	0.84	201	0
4930584F24Rik (uc012dtp.1)	AK015867			183	0
Fsd1l	uc008sxd	HGC	1.11	179	0
AK007854	uc007zzm			0	0
	AK015859			0	0
AK015219	uc007nko			236	0
	AK015305			135	0
	AK029749			204	0
AK003327	uc007apm			0	0
	AK012078			0	0
	AK016684			117	0
	AK006616	HGC	0.85	231	0
	AK131685			0	0
	AK017064			126	0
Pax6os1	NR_002867	HGC	1.12	0	162
	AK016750			126	0
	M24318			0	0
	AK015070			0	0
	AK015639	HGC	0.84	217	0
	AK012965	HGC	1.04	216	0
	AK015382			144	0
AK007116	uc009pqw			0	0
	AK015358			0	0
	AK021380			0	0
	AK006109			112	0
	AK076950	HGC	0.96	287	0
AK039403	uc008gue	HGC	0.79	147	0
	AK046275			0	0
	AK077182			159	0
	AK145513			0	0
AK076771	uc007fov	HGC	1.01	188	0
	AK015246			102	0
AK019729	uc009ogf			153	0
AK145430	uc007obl	HGC	0.93	220	0
	AK009418			0	0
	AK016552			145	0
	AK015234	HGC	0.75	155	0
Dscaml1	uc009pfx	HGC	0.68	144	0
	AK016019			155	0
	AK046905	HGC	0.97	320	0
AK079017	uc007mwe			0	0
	AK048826	HGC	0.94	249	0
AK080070	uc009nic			0	0
BC048594	uc008lli	HGC	0.95	215	0
	AK015765			0	0
	AK030081			0	0
	AK008257	HGC	0.83	181	0
	AK076537	HGC	0.81	263	0
	AK029924			143	0
	AK015638			178	0
AK013046	uc007bgw	HGC	1.1	206	0
	AK016360			130	0
AK076976	uc007qzr			0	0
AK087351	uc007rjm	HGC	0.76	0	0
	AK134149			0	0
AK040197	uc008hrl	HGC	0.91	367	0
	AK005910	HGC	0.98	241	0
AK076965	uc009fxc			140	0
AK079034	uc008xkk	HGC	1	224	0
AK016496	uc008xdw			175	0
	AK007362			168	0
	AK016382			0	0
	AK164224			0	0
	AK019784	HGC	0.94	188	0
	AK021219			152	0
AK005833	uc007srf			229	0
	AK016987			173	0
	AK019584			136	0
	AK133367			212	0
	AK016003			0	0
	AK006719			126	0
	AK016106			139	0
AK043982	uc007xwu			0	0
	AK015845			0	0
AK133155	uc009bhe			110	0
	AK085521	HGC	0.69	180	0
	AK030036	HGC	0.93	374	0
	AK015152			0	0
AK052812	uc008hrb			133	0
	AK133305			169	0
	AK015816			0	0
	AK006860			127	0
Metap2	uc007gvf			129	0
	AK030072			236	0
	AK017135			116	0
	AK046472			0	0
	AK016587			107	0
	AK017004			182	0
	AK015774			108	0
AK086460	uc007zey			297	0
AK132765	uc009iiu			135	0
AK160141	uc007zaa	HGC	1.29	291	0
	AK014816	HGC	0.75	216	0
St3gal6	uc007znw	HGC	0.8	176	162
	AK015521			0	0
	AK042171	HGC	0.88	246	0
	AK082127	HGC	1.15	219	0
AK015528	uc007dfk			173	0
	AK016051			166	0
	AK161332	HGC	0.95	336	0
Unc5cl	uc008cyc			101	0
AK157878	uc009mlj	HGC	0.9	212	0
AK012547	uc008swi	HGC	0.91	287	0
	AK015451			0	0
	AK006620	HGC	0.91	236	0
	AK017123			0	0
	AK161715			145	0
	AK016233			148	0
	AK014867			112	0
	AK085506	HGC	1	250	0
	AK007196			144	0
	AK007778			0	0
AK131819	uc008uhc	HGC	0.96	848	0
	AK015983			0	0
8430427H17Rik	uc008nhw	HGC	0.94	272	0
AK133142	uc007dxm			0	0
	BC048919			0	0
	AK016402			0	0
	AK020896			0	0
AK004585	uc007nkz	HGC	0.92	207	0
BC048765	uc007vop			105	0
	BC059101			209	0
AK038711	uc007uzp			0	0
	AK016806	HGC	1.3	346	0
	AK041974	HGC	1.03	138	0
AK078191	uc009hfa			0	0
	AK019705			0	0
	AK036265	HGC	0.84	233	0
	BC052793	HGC	1.29	291	0
	AK015836			0	0
	AK006066			125	0
AK076892	uc008bbh			0	0
AK016307	uc007xol			203	0
AK033854	uc009ecs			0	0
	AK015909			128	0
	AK007090	HGC	0.9	192	0
	AK016253			134	0
E130201H02Rik	NR_024324	HGC	0.97	123	240
	AK015054			0	0
AK157218	uc008mgp			0	0
Gm15698	NR_003564			0	0
1700021P22Rik	uc009gps	HGC	0.82	263	0
	AK006689			107	0
AK039238	uc008pkk			0	0
	AK086739			112	226
	AK016862	HGC	0.95	208	0
AK012226	uc007sly			0	0
	AK076564			0	0
AK010129	uc007vqk	HGC	0.95	108	0
uc009igm	AK157435			0	0
AK029857	uc008wpr			252	0
DQ715729	uc009dqv	HGC	1.01	235	0
	AK019555			107	0
AK133438	uc009gih			122	0
AK020919	uc007ype			0	0
	AK007900	HGC	1.1	180	0
AK019036	uc007zzo			0	0
	AK046601			216	0
	AK040987			0	0
AK007770	uc009cya			226	0
	AK046572			0	0
	AK015880			0	0
	AK016366			166	0
AK133017	uc009lgd			208	0
	AK005783			105	0
AK038880	uc009jgv			0	0
	AK018848			142	0
	AK041002			170	0
	AK015815			0	0
AK015665	uc008ljw			0	0
	AK050462			0	0
AK036535	uc007gst			0	0
	AK007179			195	0
AK007083	uc009bfb	HGC	0.97	0	0
	AK007275	HGC	0.96	200	0
	AK020166	HGC	0.9	220	0
	AK040512			0	0
AK086006	uc008hbv			0	0
	AK015531			0	0
	AK005575	HGC	0.95	261	0
	AK007252			112	0
	AK016999			128	0
	AK015503			0	0
	AK031914	HGC	1.05	240	0
	BC067070	HGC	0.9	250	0
	AK133430	HGC	1.04	234	0
	X99253			233	0
	AK018281			0	0
	AK007008			145	0
AK029726	uc009kfx			251	0
AK028094	uc007ujf			113	0
	AK086609			0	0
AK087392	uc007ief			112	0
	AK034331	HGC	1	318	0
	AK080622	HGC	0.99	232	0
AK085365	uc007gsq	HGC	0.75	207	0
AK017010	uc009mhs	HGC	1.05	281	0
	AK019692	HGC	1.09	281	0
AK006961	uc008zrv			127	0
	AK016240			437	0
1700008J07Rik	NR_024331	HGC	0.99	207	0
	AK020901			0	0
	AK016379			153	0
	AK006204			0	0
	AK013802			0	0
AK006510	uc008vgs			247	0
AK144886	uc007ohq			0	0
AK079018	uc007flp			113	186
AK161480	uc007ymw			185	0
	AK006277			262	0
AK080223	uc009lmi			0	0
	AK006675	HGC	0.91	324	0
	AK015425			145	0
AK019688	uc007epv			114	0
AK163252	uc008nlv	HGC	0.71	280	0
	AK044604	HGC	1.37	197	0
AK016417	uc009blh	HGC	1.03	308	0
AK076938	uc007gzq			149	0
	AK144519	HGC	0.82	0	0
	AK079625			0	0
DQ687153	uc008skp			0	0
	AK086314			0	0
	AK028736			0	0
	AK045234			0	0
AK012238	uc009ptw	HGC	0.92	228	0
BC048666	uc008fec			173	0
AK046045	uc009igl			0	0
Eif4g3	uc008vjw	HGC	1.05	255	0
	AK016692			116	0
	AK015206	HGC	0.9	220	0
AK047145	uc007tcs			0	0
	AK016008			0	0
	AK007232			0	0
AK019057	uc008ybr			121	0
	AK016725	HGC	0.86	330	213
	AK015353			104	0
	AK133189	HGC	1.1	212	0
AK016730	uc007bup			0	0
AK158295	uc009hbb	HGC	0.86	166	0
AK179786	uc007nsi	HGC	1.03	233	0
AK019679	uc008kjs			164	0
AK006250	uc008bdb	HGC	0.93	175	0
	AK015461	HGC	1.01	274	0
AK019667	uc007taa			155	0
	AK016922	HGC	0.92	169	0
	AK034626	HGC	1.09	183	0
AK131759	uc007ygb			0	0
	AK015180			152	0
	AK006722			119	0
AK006651	uc008qgc	HGC	0.82	172	0
	AK014902	HGC	1.01	156	0
AK163488	uc009tih			0	0
	AK019754			0	0
	AK162444			134	0
	AK016119			183	0
	AK016261			0	0
Catsper2(AK142380)	uc008lyy	HGC	0.91	104	0
	AK029748			108	162
AK052792	uc008qtn			0	0
	AK015084			236	0
	AK014962	HGC	1.09	238	0
	AK017047			0	0
	BC030033			0	0
	AK132559			129	0
AK046440	uc008oue	HGC	1.25	245	0
	BC054063	HGC	1.03	150	163
	AK015127			139	0
AK089615	uc008gyv			0	0
AK039780	uc007boy	HGC	0.68	0	130
	AK007104	HGC	1.07	386	0
	AK016970			0	0
AK040806	uc007vcq			0	0
	AK014830	HGC	1.03	168	0
	AK219183			0	0
Gm568	uc008suh			121	0
AK158658	uc007dua			0	0
	AK013313	HGC	1	296	0
AB041800	uc008zeh	HGC	1.12	181	0
	AK018780			248	0
	AK046652	HGC	1.24	228	0
AK040733	uc009qzd	HGC	1.08	176	0
	AK006003			124	0
	K03466	HGC	0.85	163	125
AK013680	uc007ici	HGC	0.91	232	0
1700012B15Rik	uc007mwk	HGC	1.16	273	0
TCR-beta chain	uc009bpq			0	0
	AK016108	HGC	0.85	294	167
	AK006784	HGC	0.79	242	0
AK076774	uc007ktf			0	0
	AK007217			134	0
AK038391	uc007psy			0	0
AK161431	uc008mms			182	0
	AK006299			176	0
AK016841	uc009nur			0	0
	AK015975			283	0
	AK016029			124	0
	AK134561			0	0
	AK006267	HGC	0.93	301	0
AK016388	uc008pib	HGC	1.15	192	0
Zfp389	NR_026798			174	0
	AK007004			132	0
	AK015974			114	0
AK041437	uc008evn			0	0
	AK029583			0	0
	AK010838	HGC	0.95	208	0
	AK044580	HGC	0.79	126	0
	AK006506	HGC	0.83	256	0
	AK016143			121	0
	AK017083			148	0
	AK006298	HGC	0.94	170	0
AK008705	uc009mlp	HGC	0.86	152	0
	AK051225			0	0
AK019631	uc008vpq			126	0
	AK015569			0	0
	AK040358	HGC	0.91	208	0
	AK030193			148	0
AK015782	uc008aet	HGC	0.99	213	0
	AK007120			0	0
	AK015623			183	0
DQ697944	uc008smn			0	0
AK019563	uc009msc			104	0
	AK015601			143	0
AK019031	uc007van			224	0
AK019824	uc009oso	HGC	1.36	222	0
	AK016157			140	0
	AK006642	HGC	1.12	177	126
	AK035449			0	0
AK006454	uc009auq	HGC	1	168	0
	AK006574			111	0
	AK007117	HGC	0.84	181	0
AK006413	uc008xmo			218	0
AY512912	uc008sxl			0	0
	AK078497			0	0
	BC038629			0	0
AK040752	uc007ktl	HGC	1	289	0
	AK033633	HGC	1.04	199	0
AK043991	uc007nmi			102	206
	AK015443			153	0
U83175	uc009den	HGC	0.88	172	0
AK030154	uc008xka			131	0
AK076988	uc007rxs			130	0
	AK161816			135	0
	AK019642			142	0
	AK014121			101	0
	AK016455	HGC	0.92	180	0
	AK076825			0	0
AK197603	uc009roa			0	0
AK030357	uc008mcd			123	0
	AK006090			0	0
AK079818	uc008ftc			0	0
	AK015743	HGC	1.32	176	0
	AK012876			0	0
AK131696	uc009exx			174	0
AK076358	uc009fxk			214	0
	AK039212			0	0
4930520O04Rik	uc009rxf	HGC	0.95	208	0
AK086168	uc007ypf			0	0
	AK170065	HGC	0.82	189	0
ErT-1	uc007wgd			158	0
	AK146114	HGC	0.96	239	0
AK076668	uc008iba	HGC	0.93	200	0
	AK015450			122	0
TCR-beta chain	uc009bpv			0	0
	AK043475	HGC	0.93	301	0
AK048798	uc007nws	HGC	0.95	153	0
	AK032771			0	0
	AK020850	HGC	1.03	215	0
	AK015342			0	0
etoile	uc007wbg			0	0
	AK015835			216	0
Ifltd1	uc009erk			134	0
	AK037080			0	0
Spg3a	uc007ntd			0	0
	AK006100	HGC	1.32	182	0
	AK081192			0	0
	AK006956	HGC	1.04	193	0
	AK030271			0	0
	AK017078			0	0
4930426L09Rik	NR_024323	HGC	0.9	291	0
AK153212	uc007wgq			0	0
AK143789	uc008lgb			0	0
	AK013113			0	0
	AK015120	HGC	1.04	268	0
AK081788	uc008fxu			0	0
AK076853	uc008xgw			118	0
	AK045080			0	0
	AK016314			115	0
	AK006682			232	0
AK019697	uc007gxe			135	0
AK019743	uc008uvv	HGC	1.01	265	0
mKIAA1238	uc009dpe			176	0
	AK006130	HGC	0.86	218	176
AK015762	uc008qdl			148	0
	AK015297	HGC	0.83	189	0
	AK006399	HGC	0.95	284	0
AK037830	uc008ahw	HGC	0.97	257	0
	L09009			0	0
TCR-beta chain	uc009bpu			0	0
AK006071	uc008xwg			0	0
U89428	uc009grb			0	0
Defb42	uc007uhg			0	0
AK038386	uc008qru			0	0
AK076883	uc009beq	HGC	0.99	180	0
	AK016440			132	0
AK045385	uc007uxx			0	0
AK160437	uc007zzp			0	0
	AK015168			140	0
	AK051241			0	0
AK016383	uc007evj			0	0
	AK207509			0	0
	AK003348			0	0
BC054394	uc008nzg			128	0
	AK053940			219	0
AK040992	uc009bas			0	0
AK076959	uc007zqw			234	0
	AK020381	HGC	0.72	190	0
	AK007248			114	0
	AK016969			0	0
AK202580	uc009did			0	0
2310047D13Rik	uc007kff	HGC	0.76	317	0
AK007042	uc007mfi			0	0
	AK016200	HGC	0.77	153	0
	AK036852			115	0
Psme3	uc007lom	HGC	0.84	317	0
	AK006220			0	0
AK016177	uc007bax	HGC	1.04	238	0
	AK010155	HGC	0.82	132	0
AK140370	uc008lgr			0	0
AK040276	uc007kve			0	0
	AK015613			103	0
Gt(ROSA)26Sor	NR_027010	HGC	0.88	172	0
AK132885	uc009nck	HGC	0.85	246	126
	AK015244			0	0
	AK034101			0	0
	AK084937			0	0
	AK088428	HGC	0.98	206	0
AK030052	uc007qug			138	0
	AK131801			155	181
	AK015044			119	0
	AK082339	HGC	0.8	131	0
AK019844	uc007cwa			120	0
	AK031826	HGC	0.82	103	130
	AK133080	HGC	0.98	289	0
AK161402	uc008hbx			133	0
	AK016050			115	0
Antxrl	uc007tah			191	0
AK030453	uc008mlw			0	0
AK035706(HOTAIR)	uc007xwx			0	0
	AK006297			0	0
Prlr	uc007vfv			140	0
AK133134	uc007nbb			105	0
1700022A21Rik	NR_003953			180	0
AK052881	uc008sec			113	0
	AK021053			0	0
	AK018973			130	0
	AK042866	HGC	0.8	370	0
	AK006833			111	0
AK015395	uc008fuc			117	0
	AK007225			202	0
	AK030164	HGC	0.98	195	0
	AK013809			0	0
	AK015951			175	0
	AK019562	HGC	1.15	272	0
BC058545	uc007lzt	HGC	1	252	0
	AK079790			0	0
AK080151	uc007phg			0	0
AK042933	uc008yai			0	0
AK049264	uc008zex			0	0
	AK040401	HGC	0.83	254	0
	AK015242			121	0
	BC100512			133	0
	AK050124			0	0
AK033000	uc007nrn			0	0
AK034417	uc007uxv			101	0
	AK016203			0	0
AK042010	uc008mhq	HGC	0.99	250	0
AK006958	uc008iem			122	0
	AK019349			0	0
AK015094	uc007kxe			107	0
AK219417	uc007bdt			0	0
	AK089876			0	0
AK007255	uc008sac	HGC	0.99	301	0
	BC025014	HGC	0.85	0	0
	AK019652			0	0
	AK049966			156	0
AK019375	uc008ucu	HGC	0.76	165	141
	BC023886	HGC	0.86	189	0
	AK017077			165	0
	AK020111			0	0
AK135894	uc008rkb			0	0
AK015526	uc007meg			159	0
	AK046349	HGC	0.79	243	193
Zcwpw2	uc009rzf			0	0
	AK080300	HGC	1.05	0	0
	AK041289	HGC	1.11	214	0
	AK006880			129	0
TCR-beta chain	uc009bpy			0	0
	AJ308964			0	0
	AK016139			256	0
	AK138158	HGC	1.1	225	0
	AK018999	HGC	0.93	272	0
AK140218	uc008cad	HGC	0.79	242	0
AK086793	uc008sjb			0	0
AK005849	uc009gkw			116	0
	AK047741	HGC	0.96	323	0
	AK044811			0	0
	AK019739			0	0
	BC002209	HGC	1.31	0	0
	AK052984	HGC	1.13	110	125
AK016128	uc009lrw			123	0
	AK006010			190	0
	AK016151			169	0
C030017K20Rik	uc008wdm			0	0
AK046150	uc007umh	HGC	1	167	0
Gm628	uc007wcl			192	0
	AK020520			0	0
	AK158485			0	0
AK020645	uc007cpy			0	0
AK051804	uc009evj	HGC	0.96	380	0
Slc25a38	uc009scb	HGC	0.88	425	0
AK005793	uc007vgq	HGC	0.87	279	0
4931428F04Rik	uc009nch	HGC	0.85	246	0
	AK047499	HGC	0.83	254	0
	AK076620			0	0
	AK021085			0	0
	AK029560	HGC	0.92	236	0
	AK006714	HGC	0.86	205	0
AK021007	uc009ihq	HGC	0.74	167	0
	AK016717			0	0
	AK142341			202	0
AK035573	uc007eyw			0	0
AK007312	uc009fcd	HGC	0.81	180	0
	AK031091			0	0
	AK046914			135	0
	AK080548			104	0
	AK080390	HGC	1.05	198	0
AK143957	uc008ibo	HGC	0.96	236	0
	AK020380	HGC	1.09	251	0
	AK016196	HGC	1.04	159	0
	AK048225			112	0
AK085881	uc007vow	HGC	1.07	306	0
AK085477	uc007krk	HGC	1.13	222	0
AK147079	uc007kxd			0	0
AK076978	uc008hoq	HGC	0.86	199	0
	AK010100			0	0
	AK009534			0	0
AK016521	uc007zfw	HGC	0.84	203	0
AK144882	uc008say			135	0
AK003943	uc007kuh			0	0
	AK043615			105	0
AK009603	uc009akc	HGC	1.01	335	0
Rab22B	uc008dgi	HGC	0.89	213	145
AK019889	uc008kbz			0	0
	AK089117			0	0
AK016790	uc009vgj			0	0
AK019598	uc008dft			327	0
	AK076659	HGC	0.98	251	0
AK076700	uc007lpy			146	0
	AK006989			141	0
	AK052417			0	0
AK006973	uc007nny	HGC	1.03	259	0
AY512917	uc009jaz			0	0
AK019757	uc008jiw	HGC	0.99	179	0
	AK014993	HGC	1.08	252	0
AK087313	uc008hli			0	0
	AK006396	HGC	1.16	301	0
	AK028839			0	0
AK044020	uc008wps			252	0
	AK170699			0	0
AK144299	uc007zsi			129	0
	AK016894			0	0
B130050I23Rik (AK009699)	uc009ktf			160	0
	AK016834			0	0
	AK018874	HGC	1.01	350	0
AK148373	uc009ipj	HGC	0.86	204	0
	AK015420			107	0
	AK015040			109	0
AK084200	uc007xka			111	0
BC065777	uc007myx	HGC	0.83	151	209
	AK145188	HGC	0.98	242	0
AK086010	uc009jts			230	0
AK160260	uc008uqs			206	0
	BC051511			126	0
	BC028810	HGC	0.97	267	0
AK006702	uc009lhk			104	0
	AK018903	HGC	1.05	198	0
BC051525	uc008unk			0	0
AnMKRN1	uc009blv	HGC	1.11	257	0
	AK153660	HGC	0.92	348	0
	AK087461	HGC	0.85	221	0
	AK078603			275	0
	AK015822			137	0
AK206655	uc007hcl			0	0
AK039557	uc007qtg			191	0
	AK015407			129	0
AK167556	uc008hmg			0	0
AK015492	uc007znn	HGC	0.96	191	0
AK006001	uc008nvv	HGC	0.93	357	0
AK136039	uc007rgm			0	0
AK007898	uc007mmq	HGC	1.06	256	0
AK135675	uc009svq			0	0
	AK005840			112	0
AK047520	uc009pzg	HGC	0.86	233	0
	AK039686	HGC	0.8	269	0
	AK020838			192	0
AK085325	uc008pkm			0	0
	AK142189	HGC	0.86	157	0
	AK138162			220	0
	AK161442	HGC	0.81	151	0
AK133337	uc008ocj			290	0
	AK021082	HGC	0.92	292	0
	AK158492	HGC	0.94	254	0
AK007174	uc008ouc	HGC	0.91	227	0
	AK018860			0	0
	AK007141			127	0
	AK015571			0	0
	AK016293			0	0
	AK015597			149	0
	AK015648			0	0
	AK015734			132	0
	AK017009	HGC	1.03	434	0
	AK080501			108	0
	AK015175			0	0
AK080278	uc007wzq	HGC	1.01	0	0
	AK042711	HGC	0.95	303	0
	AK050225			0	0
Gm7337	NR_003652			157	0
	AK131699			0	0
	AK016875			206	0
	AK090142			179	0
1700049E17Rik	uc007tcy			0	0
	AK077345	HGC	1.04	299	0
	AK041029	HGC	0.78	220	0
	AK006816			119	0
	AK053789			0	0
	AK006836			0	0
	AK019510			0	0
	AK145034	HGC	0.83	190	0
	AK036853	HGC	1.09	300	0
	AK018199	HGC	1.13	0	205
art3	uc008ydj			0	0
	AK076393			164	0
	AK015416			215	119
	AK165035			215	119
AK017076	uc009mua	HGC	0.84	186	0
	AK016146			167	0
	AK032571			0	0
H19	NR_001592			103	0
	AK035610			0	0
BC022590	uc008xov			0	0
Gm6498	NR_003630			0	0
AK149453	uc007ysq			102	0
	AK166199			0	0
	AK083943			0	0
	AK046232	HGC	1.03	152	176
	AK017612			0	0
AK031097	uc008pmi			0	0
	AK081837			0	0
	AK031521			0	0
	AK051797			0	0
	AK004447	HGC	1.09	151	183
D10920	uc008tfo			0	0
	AK031302			0	0
Rab42	uc007cnr			103	0
AK157178(Meg3)	uc007pap			116	181
Gtl2	uc007par			116	181
	AK018031			0	0
	AK031522			0	0
	AK052777			0	0
Airn	NR_002853	HGC	0.83	144	0
	AK049648			0	0
	AK051693			0	0
AK043032	uc009czd			0	0
	AK020136			0	0
	AK083529	HGC	0.88	103	0
	AK153559			0	0
	AK020712	HGC	1.04	144	0
Etd	NR_034074			0	0
	AK011429			0	0
	AK018053			0	0
	AK015151			0	0
Sat1	uc009urr	HGC	0.86	311	0
	AK030418			0	0
[truncated: 1,026 more rows]

## Sheet: up-regulated 
Gene Symbol	SeqID	Classfication	CpG O/E	H3K4me3(Score)	H3K27me3(Score)
	BC100504			127	0
	AK018942			239	217
AK015428	uc007vys			0	0
	BC049745			129	0
AK006831	uc007hbx	HGC	0.7	219	0
BC050982	uc009gzw			187	0
AK131719	uc008vov			180	0
AK005780	uc008cye			238	0
AK076728	uc007zkk			166	0
	AK005929			0	0
AK006052	uc009aym			113	0
	AK006669			108	246
AK006024	uc007sdp			0	0
AK076952	uc009gzv			232	0
1700013N18Rik	NR_003639			207	0
AK006852	uc008igz			106	0
AK005838	uc007zqm			185	0
	AK018981			179	0
AK006752	uc007jyo	HGC	0.75	224	0
1700123L14Rik	NR_003643			222	0
AK017048	uc008vyo			155	0
AK016172	uc008wlp			0	0
AK005912	uc007mef			159	0
	AK006844			142	0
AK006633	uc007ejk			122	0
BC049706	uc007ejl			136	0
BC099582	uc008xlx			130	0
AK006653	uc009vft			0	0
AK005643	uc007baq			119	0
	AK018932			206	0
AK006470(Scgb2b1-ps)	uc009gil			137	0
	AK034299	HGC	0.82	174	172
AK016605	uc007yja			160	0
AK076805	uc007cgb			207	0
	AK076832			114	0
	BC048565			161	0
EG545936	uc009fqn			200	0
	AK016723			159	0
BC048628	uc007atp			140	0
AK006389	uc007zke			172	0
	AK006530	HGC	0.93	299	0
	AK007098			0	0
AK006412	uc009dqq			211	0
AK018902	uc008zrz			218	0
	AK076915			0	0
AK005653	uc007fbl			114	0
	AK076741			0	0
AK016427	uc007nsv			113	0
	AK006660			153	0
AK006507	uc007dit			0	0
	AK007144	HGC	0.84	0	0
	AK006406			130	0
AK076897	uc009nkt			184	0
AK015482	uc008tlv			186	0
	BC055113			127	0
Aldoart2	NR_003959			174	0
BC050972	uc009qfh			208	0
	AK015139			149	0
AK007110	uc007mza			237	0
	AK015330			0	0
AK007100	uc007rsc			136	0
	AK006169			137	0
AK007102	uc007rcu			117	0
AK076930	uc008ygq			179	0
	AK005964			125	0
AK006725	uc008zru			144	0
	AK006618			162	0
AK018976	uc008hip			165	0
AK015844	uc008wmv			117	0
AK005639	uc008rft			110	0
	AK076893	HGC	1.05	268	0
AK006376	uc008mmu			182	0
Gm5334	NR_003648			169	0
AK019561	uc007hen			177	0
AK076963	uc009avw			123	0
AK019797	uc007zsu			152	0
AK077115	uc007zsa			168	0
AK007249	uc009kuf	HGC	0.9	182	0
AK006991	uc007rcs			178	0
	AK006377			0	0
Gm1604	uc008aiu			0	0
	AK015829	HGC	0.99	235	0
BC049642	uc008wtg			183	0
AK007238	uc008ahx			171	0
	AK007287			0	0
AK018974	uc007obk			129	0
	AK019660			0	0
BC049717	uc008och			128	0
	AK019586			108	0
AK005634	uc007knx			120	0
	AK016056			182	0
AK006039	uc008dkd			0	0
AK007216	uc009kea			117	0
	BC049716			103	0
AK019699	uc007srg			0	0
DQ284430	uc008fqj			109	0
AK016281	uc008zrx			108	0
AK076884	uc009ueo			0	0
AK076946	uc007fkm			0	0
AK006895	uc007edr			146	0
	AK018927	HGC	0.76	243	0
AK014999	uc009rdf			170	0
AK077183	uc008fud			214	0
AK016131	uc007nku	HGC	1.01	237	0
	AK005715			0	0
	AK015550			137	0
	AK016045			0	0
AK006202	uc008zgx			120	0
AK006812	uc008ytp			165	0
	AK006765			159	0
AK007084	uc008vke			258	0
AK006121	uc009awo			191	0
	AK006982			127	0
AK076692	uc008wmu			117	0
	AK007128			131	0
AK076909	uc008hbp			128	0
AK006933	uc008cph			183	0
Ube2dnl	NR_003645			106	0
BC048585	uc007lpo			215	0
	AK016091			129	0
AK006870	uc009qvr			117	0
AK029663	uc008kcx			220	0
AK019722	uc007ify			218	0
AK006167	uc009qow			189	0
AK015183	uc009rea			205	0
AK006896	uc009cjn			0	0
	AK005899			131	0
	AK015479			171	0
	AK006593			121	0
	AK015838			166	0
	AK007300			134	0
AK006610	uc008hnr			120	0
	AK015238			225	0
	AK015494			110	0
	AK019708			209	0
AK006531	uc008nfy			131	0
	AK030044			175	0
AK016244	uc007aou			222	0
AK006512	uc007qgq			108	0
	AK007108	HGC	0.95	191	0
AK006563	uc008fvy			0	0
AK006644	uc007ude			169	0
	AK019648			205	0
	AK006832			182	0
AK016926	uc008wso			159	0
	AK014881			103	0
	AK006983			113	0
	AK015977			155	0
	AK014973			0	0
AK029641	uc009cea			0	0
	AK007034			170	0
AK006310	uc008lmt			138	0
	AK076940			184	0
	AK017073			115	0
	AK016610			195	0
AK018858	uc008hwh			228	0
AK007223	uc008vwe			196	0
AK076851	uc007vwv			166	0
	AK006482			133	0
	AK015499			0	0
4921511C20Rik	NR_003646			0	0
AK161354	uc008vsf			0	0
AK006766	uc008pcg			136	0
	AK015101			0	0
	AK006615			0	0
	AK006720	HGC	1.11	220	0
AK006996	uc007vyv			115	0
4930488L21Rik	NR_026888	HGC	0.93	198	0
BC098228	uc007hfc			237	0
AK006540	uc009dkx			120	0
AK016162	uc008qtk			202	0
AK007025	uc008fvz			141	0
AK018948	uc008xvs			0	0
AK076916	uc007hff			163	0
	AK019553			168	0
	AK018844			142	0
	AK006151			111	0
	AK006818	HGC	0.81	322	0
AK005811	uc008oeh			219	0
	AK006712			484	0
	AK015779			109	0
1700020N18Rik	NR_026924			196	0
AK016078	uc007djs			164	0
	AK015998			165	0
AK019711	uc007ztc			117	0
	AK015455			111	0
	AK015632			106	0
AK076902	uc008wnt			130	0
	AK006238			0	0
	AK016161			287	272
	AK005916			119	0
	AK016768			0	0
AK133139	uc009hqx			225	0
	AK015163			135	0
AK016243	uc009jad			117	0
	AK016211			155	0
AK076759	uc008rde			150	235
AK019630	uc007ifx			218	0
AK076702	uc007uro			263	0
AK006701	uc007ibh			254	0
AK007185	uc007rdc			101	0
	AK006696			0	0
	AK015830			113	0
	AK016331			108	0
	AK006266	HGC	1.19	182	0
AK015610	uc008rtv			0	0
AK007149	uc007uft			153	0
	AK005844			166	0
AK015236	uc007sap			0	0
	AK019755			0	0
	AK016406			228	428
	AK015185			187	0
AK015099	uc007enq			103	0
AK005958	uc007xzn			157	0
	AK019767			127	0
	AK014936			103	0
	AK006751	HGC	0.99	202	0
	AK015232			145	0
AK005607	uc008hwn			143	0
AK007020	uc007nww	HGC	0.92	246	0
	AK006915			180	0
AK007038	uc007uma			174	162
AK015429	uc007uxt			161	206
	BC048633	HGC	0.76	165	206
AK076894	uc007upd			106	0
	AK016189			0	0
	AK016855	HGC	0.91	195	0
AK008572	uc008amm			0	0
	AK006863	HGC	0.98	173	0
	AK015487			136	0
	AK007157			137	0
	AK005995			0	0
AK006451	uc008ysj			133	0
	AK016132			187	0
AK030206	uc008wcc			249	0
AK076979	uc007ovb			0	0
	AK078302	HGC	0.93	266	0
BC048519	uc007vrs			145	0
	AK006385			0	0
AK076840	uc009osk			102	0
Smok4a	uc008amk			194	0
AK006560	uc007nnq			0	0
	AK018837	HGC	0.72	224	0
	AK005648			117	0
	AK077096			160	0
AK006942	uc009dnm			657	0
AK019792	uc009odt			112	0
	AK017000			143	0
	AK006198			139	0
	AK016582	HGC	1.09	202	0
AK015470	uc007quf			138	0
	AK019638			152	0
AK016412	uc007ejd			193	0
AK015940	uc007qcb			132	0
4930579G22Rik	uc008ztq	HGC	0.98	197	0
AK016914	uc009eqr			211	0
	AK077216			222	0
	AK008823			0	0
BC048678	uc008pqo			103	0
	AK016315			0	0
AK076673	uc007hdh			146	278
Slco6d1(AK133206)	uc007cfw			208	0
	AK006735			136	0
	AK005742			151	0
	AK005676			215	0
	AK007234			0	0
	AK006073			298	0
	AK007066			0	0
AK132847	uc008dfb			125	0
	AK019703			0	0
AK016046	uc007fmk			0	0
	AK007211			0	0
	AK014799			0	0
	AK007258			178	0
1700012B09Rik	uc009oex			170	0
BC049735	uc009goz			0	0
AK076711	uc007sqx			125	0
	AK029704			143	0
	AK015069			153	0
	AK016094			162	0
AK007006	uc007uyf			174	0
AK132957	uc009ryo			119	0
AK006947	uc007rzy			0	0
AK016893	uc007aqy			164	0
	AK076878			220	0
AK018937	uc009lkg	HGC	1.15	246	0
AK016549	uc009klt			181	0
	AK006117			108	0
AK007162	uc009ozr			146	0
AK005712	uc007sdq			0	0
	AK030170			155	0
AK132729	uc007qbk	HGC	1	190	0
AK076966	uc007rcg			147	0
AK015955	uc009pjj			188	0
AK015188	uc007hcv			134	0
AK133250	uc008sus			0	0
AK005539	uc009tga			0	0
AK015773	uc007hee			141	0
	AK005792			197	0
	AK006042			120	0
AK131746	uc008bfj			145	0
AK015200	uc008xqg			113	0
AK016511	uc007ugw	HGC	0.8	358	0
	AK015803	HGC	1.04	356	0
1700049L16Rik	NR_003644			180	0
	AK016697			157	0
	AK016753			283	0
AK016630	uc009jib	HGC	1.09	221	0
	BC048639			224	0
AK006031	uc007pjv			273	0
AK016163	uc007zua			154	0
AK019657	uc007gnq			125	0
AK015950	uc007dau			0	0
	AK015580			279	0
	AK016885			151	0
AK016813	uc007itf			157	0
	AK016285			161	0
	AK015098			138	0
	AK006223			167	0
AK006968	uc009hbz			106	0
	AK005945			155	0
AK006934	uc009pwx			145	0
AK005754	uc007jjp			0	0
	AK132715			102	0
	AK006687	HGC	1.26	177	0
AK015376	uc007azt			163	0
	AK015574	HGC	0.86	190	0
AK007305	uc007uyb			142	0
AK015760	uc008ezi			169	0
AK019731	uc007kkw			160	0
	AK007199			107	0
AK015409	uc008rev			132	0
	AK015039			184	0
AK018841	uc009raw			192	0
AK006239	uc007fgf	HGC	0.91	263	0
	AK077042			125	0
4930465K10Rik	uc008frr	HGC	1.03	237	0
AK016399	uc009sdk			186	0
AK016100	uc007ilo			295	0
AK015191	uc008rxd			123	0
	AK016492			117	0
	AK005981			107	0
	BC030462			0	0
AK076783	uc009qzg	HGC	1.08	176	0
AK029878	uc008dvs			132	0
AK144266	uc008keh			163	156
	AK016005			103	0
Speer5-ps1	NR_027506			141	0
	AK017039			135	0
	AK015221			138	0
AK015384	uc007ajk	HGC	0.89	237	0
	AK019653			185	0
	AK015556			145	0
	AK007126			177	0
AK017040	uc009qsg	HGC	1.15	221	0
AK076790	uc007ngy			147	0
AK019838	uc009scs			155	0
AK015105	uc008qqt			188	0
	AK015154			131	0
	AK016087			0	0
	AK007286	HGC	1.05	181	0
	AK019814			134	0
	AK029639			146	0
	AK015626	HGC	0.96	194	0
AK076905	uc009vgq			0	0
Speer5-ps1	NR_001582			122	0
AK029624	uc009lrj			161	0
mKIAA1317	uc008eth			111	0
	AK019742			139	0
	AK015908			218	0
	AK051554			0	0
	AK016880			125	0
	AK016245			171	0
	AK017082			155	0
	AK006520			107	0
AK019804	uc007wnq			144	0
AK019737	uc009keb			120	0
AK006138	uc007xer			181	0
	AK016030			165	0
AK019604	uc008kgk			162	0
AK015463	uc007xzo			0	0
	AK006559			123	0
	AK005598			0	0
	AK016680			166	0
AK018891	uc007lvm			142	0
AK019723	uc007tjg			0	0
AK015347	uc007cew			0	0
BC049653	uc009gor			166	0
AK016444	uc008hij			192	0
	AK133239			183	0
AK028088	uc007vcl			0	0
	AK015090	HGC	1.13	195	145
Tspy-ps	AJ001379			121	0
	AK016098			114	0
AK015749	uc008mqa			0	0
AK006076	uc007pzl			129	0
AK015892	uc009rxe			114	0
	AK076995			116	0
	AK006624			112	176
BC052364	uc008win			158	0
Tspy-ps	NR_027507			121	0
	AK006857			128	0
AK077008	uc007qvc			0	0
	AK007229			103	0
BC048601	uc007qcv			127	0
AK006348	uc009jnu			192	0
AK015072	uc007zlj			137	0
	AK016851			176	0
	AK015082			0	0
	AK006850			0	0
	BC048001			155	171
	AK016136			126	0
AK015444	uc007uth			269	0
AK133007	uc008edz			147	0
	AK019811			103	0
	AK016867			0	0
AK076665	uc008orn			0	0
mKIAA1317	uc008etg			111	0
	AK019622			250	0
	AK019813			157	0
	AK015432			0	0
AK019698	uc007dxz			123	0
AK016284	uc007sri			116	0
	AK014831	HGC	1.07	601	0
	AK006707			149	0
	AK015252			141	0
AK005677	uc007run			167	0
	AK132914	HGC	0.99	249	0
	AK019783	HGC	1.11	276	176
AK076660	uc007cvd			144	0
	AK005917			154	0
AK015379	uc007emy			166	0
	AK018904			191	0
	AK015793			0	0
AK007073	uc008fuj			150	0
Morn3	uc008zmz			153	0
AK006485	uc008xlw			122	0
	AK007183			0	0
	AK005997			109	0
DQ072382	uc007yei			0	0
AK131781	uc007xij			0	0
	AK018872			144	0
	AK015266			115	0
AK015818	uc007uvj			0	0
	AK019587			0	0
	AK016024	HGC	0.92	218	0
	AK016793			386	0
AK006037	uc007eyj	HGC	0.92	182	0
	AK007284			133	0
	AK006845			167	0
	AK015119			226	0
AK006186	uc008nen			175	0
	AK006360			163	0
	AK006091	HGC	0.82	224	0
AK005635	uc009pfq			118	0
	AK005755			129	0
AK016361	uc009dci			0	0
	AK018915			111	0
AK006894	uc009bis			118	0
AK015227	uc007srh			0	0
AK076984	uc008ehr			0	0
	AK015323			0	0
AK016686	uc007see			0	0
AK016948	uc007iga			0	0
AK016016	uc008ezf			207	0
AK015969	uc008lwz	HGC	0.92	254	0
	AK015366			256	0
AK015562	uc008mje	HGC	0.88	165	0
AK019704	uc008ehv			0	0
	AK015262			295	0
	AK006325			143	0
AK038423	uc007azi	HGC	0.89	228	0
	AK015596			125	0
	AK016745			117	0
	AK019828			0	0
	AK006729			171	0
AK016178	uc007puv			152	0
AK006022	uc008lxa	HGC	0.92	254	0
	AK015510			147	0
AK029630	uc007dak			142	0
	AK019859			135	129
AK007204	uc008dvj			162	0
	AK016439			174	0
	AK016333			188	0
	AK077189			221	179
	AK014901			224	0
BC049685	uc007tbw			128	0
	AK006914			222	0
	AK019800			106	0
AK006921	uc008rpz			0	0
AK019710	uc008lqo			103	0
	AK006843			130	0
AK155560	uc009cwf			0	0
	AK019572			137	0
AK029633	uc008paf			104	0
1700073E17Rik	NR_003625			159	0
	AK006590			132	0
	AK131705	HGC	0.87	200	162
AK005578	uc009jnt			192	0
	AK016503	HGC	0.87	166	0
	BC048591			123	0
	AK019616			0	0
AK132829	uc008rbl			0	0
	AK016494			164	0
AK019772	uc009dta	HGC	0.9	312	0
AK017125	uc007dqr			124	0
AK016120	uc008gys			163	0
	AK131727	HGC	1.17	174	0
AK006051	uc007kde	HGC	0.84	124	0
AK029646	uc007vkw			0	0
	BC048567	HGC	1.06	230	0
AK076655	uc007ikz			158	0
	AK015114			166	0
	AK005751			153	0
	AK029760			165	0
AK006595	uc007eda			250	0
	AK006012			224	0
	AK006764	HGC	1.01	205	0
AK131804	uc007zfx	HGC	0.84	203	0
	AK015201			129	0
AK015615	uc007wwf	HGC	0.84	264	0
BC042407	uc009jhc			0	0
	AK006032	HGC	0.85	322	0
	AK021347	HGC	1.43	129	0
	AK016950			309	0
	AK015361			0	0
AK076925	uc007ecz	HGC	1.02	0	0
AK076911	uc008itk			0	0
AK076935	uc008jor			127	0
BC100523	uc009cxn			0	0
AK006581	uc008sme			0	0
	AK015964			0	0
AK005363	uc008wsp			0	0
AK015363	uc008mzn			0	0
	AK016410			0	0
AK006884	uc007osa	HGC	1.05	165	0
AK015118	uc008osz			107	0
AK015520	uc007rxq			130	0
	AK006846			0	0
	AK007033			0	0
AK015174	uc009orc			197	0
	AK006908			0	0
AK015324	uc008xiw			0	0
	AK019673			0	0
	AK019750			300	0
	AK016703			187	0
	AK080546	HGC	0.79	243	193
	AK017091			156	0
AK019626	uc008ajz			156	0
AK086943	uc009plm			0	0
AK019623	uc007qsa			159	0
	AK006436			183	0
	AK006354			150	0
	AK006278	HGC	0.91	207	0
	AK076933			117	0
	AK015691			102	0
	AK015344	HGC	0.7	162	0
AK046160	uc007fed			122	0
	AK006851			122	0
	AK006317	HGC	0.87	180	0
AK133038	uc007zrd			163	0
	AK014914			339	0
	AK006126			254	0
	AK030176			135	0
	AK017042			170	0
	AK017121			156	190
AK006623	uc009ogl			0	0
	AK015194			169	0
	AK015186			158	0
	AK015485			0	0
AK079713	uc007oth			0	0
AK132743	uc008hof			0	0
AK016961	uc008shn			117	0
AK007137	uc009jyh			164	0
AK005722	uc007jeq			242	0
	AK131796	HGC	1.07	261	0
AK018866	uc008uqr			145	0
	AK005733			138	0
	AK015532	HGC	0.96	236	0
	AK007010	HGC	0.88	311	0
	AK015258			101	0
AK037571	uc009duh			213	0
	AK016564			113	0
	AK014052			0	0
AK016650	uc009glf			106	0
AK019745	uc008vsx			0	0
AK016040	uc007rxr			130	0
	AK015588	HGC	0.89	180	0
AK006923	uc008yyk			317	0
	AK006995	HGC	1.04	160	159
	AK135931			0	0
	AK015091			102	0
AK040173	uc008xau	HGC	1	189	0
AK048032	uc009tvj			0	0
	AK006649			308	198
Ccdc37(AK021139)	uc009cxi			251	192
Rpgrip1(AK039097)	uc007toq			0	0
AK132720	uc007ifd	HGC	0.93	299	0
	AK005961			196	0
AK052226	uc007ayw			0	0
	AK015226			176	0
	AK015235			114	0
	AK005901			130	0
	AK086441	HGC	0.93	197	0
	AK020986			236	0
	AK006716			107	0
AK019781	uc009nol			147	0
AK015306	uc009oao	HGC	0.86	229	0
	AK015853			114	0
AK006909	uc008eze			207	0
AK007260	uc008ryu			205	0
	AK006868			0	0
	AK015112			166	0
AK005839	uc008qyp	HGC	0.99	221	0
4930474M22Rik	uc008amz			128	0
Nme5(AK138562)	uc008ekr			196	0
	AK015876			0	0
	AK016822			141	0
AK077070	uc008gzi			135	0
	AK030245			121	0
	AK006604			0	0
AK131825	uc009ctt			0	0
AK161406	uc007kit	HGC	1.1	212	0
	AK019843			117	0
DQ874391	uc009vfl			0	0
AK076937	uc009pln			159	0
	AK015577			145	0
	AK019831			205	0
AK015336	uc007ukz			124	0
	AK006847			0	0
	AK006998			100	0
	AK076870			125	0
1700057G04Rik	uc009rap			0	0
	AK015085			145	0
	AK015405			263	0
	AK015449			124	0
	AK015131			217	249
	AK015419			0	0
	AK016095			119	0
AK014882	uc007hfg			163	0
AK006355	uc009gyl	HGC	0.85	137	129
	AK015173			105	0
	AK006476			170	244
AK076809	uc008eht			0	0
AK016430	uc008xve			177	0
	AK029496			0	0
AK015741	uc009lwi			132	0
	AK006648	HGC	0.83	157	0
	AK015026			0	0
AK016265	uc008ruy	HGC	0.82	166	0
AK076685	uc009cbi			231	0
	AK017046			225	0
	AK019768			148	0
	AK016760			180	0
	AK016105	HGC	0.63	194	0
AK007214	uc008fpq			128	0
	AK005857			0	0
	AK017043			136	0
AK146160	uc009qui	HGC	0.86	186	0
DQ072380	uc007yeg			0	0
AK080399	uc007bol			0	0
	AK006663			124	0
AK015607	uc007uyg			174	0
	AK005966			0	0
	AK016423			109	0
	AK015343			175	0
AK076849	uc009idi	HGC	0.85	206	148
AK015814	uc007qtp			175	0
AK133807	uc008yig	HGC	0.73	167	120
	AK133346			237	0
Speer9-ps1	NR_001583			140	0
	AK015216			157	0
	AK007306			250	0
	AK076703			128	0
	AK016220			171	0
AK006465	uc008ppk			104	0
	AK016418			155	0
	AK016486	HGC	0.89	185	0
AK018988	uc009otz	HGC	0.97	204	0
	AK015674			111	0
AK015373	uc008kjz			117	0
AK139678	uc007zqv			0	0
	AK019718	HGC	0.86	319	0
	AK006740			152	0
	AK015230			202	0
AK006196	uc007wfq	HGC	0.91	239	0
	AK006067			194	0
	AK077006			113	0
AK006486	uc008nbr			0	0
AK160416	uc008dfm			152	0
AK006331	uc007mfh			157	0
	AK019567			115	0
AK018913	uc007svs			132	0
	AK006853			115	0
	AK016182			0	0
	AK006936			165	0
	AK014935	HGC	0.9	286	0
	AK006345	HGC	0.99	255	0
AK081945	uc007nrj			0	0
AK082307	uc007zts			0	0
AK029795	uc007ffi			136	0
4930448K20Rik	NR_004448			129	0
	AK086661	HGC	0.93	197	0
	AK005685			112	0
	AK017129			0	0
	AK020357			167	0
	AK018898			112	0
	AK005737	HGC	0.84	239	0
	AK131883			0	0
	AK005466			0	0
AK014969	uc007qms			156	0
AK132076	uc007pwy			0	0
AK076658	uc008ehs			0	0
AK016077	uc008fmz	HGC	0.89	206	0
AK019593	uc007uuk			0	0
AK005649	uc007yfu			176	0
AK076918	uc008xir			123	0
	AK007236			0	0
	AK015281			121	0
AK047804	uc007dxy			0	0
	AK016843			131	0
AK019801	uc007shy			0	0
	AK005124	HGC	0.79	169	0
AK006426	uc009ots			0	0
	AK006053			122	0
AK005629	uc007rct			178	0
AK077064	uc009vhq			0	0
	AK160417			112	0
	AK015589			0	0
AK006664	uc008zlk			163	0
	AK015192			0	0
	AK015551			113	0
AK007095	uc009mqu			106	0
	AK007037			212	0
AK007082	uc009jdo	HGC	0.89	242	0
	AK006698	HGC	1.14	227	0
AK006191	uc007zwy	HGC	0.93	210	0
AK016393	uc008paw			160	0
	AK018992			140	0
	AK018939	HGC	0.8	199	0
	AK015554			226	0
	AK018958			0	0
	AK005735			0	0
	AK083519			315	0
	AK016607			109	0
AK006474	uc008oci			290	0
	AK006783			106	0
	AK044736			0	0
AK019680	uc007xcp			155	0
	AK016981	HGC	1.17	223	0
AK132898	uc009fiw			0	0
AK145231	uc008njn	HGC	1	223	0
	AK016983			134	0
AK015999	uc008rlm	HGC	0.95	316	0
	AK050221			0	0
AK006045	uc007eln	HGC	1	285	0
AB080658	uc008msv			118	190
AK019709	uc009axe			152	0
AK006231	uc007vqn			112	0
AK019573	uc007fko			119	0
	AK015575			0	0
AK015413	uc007nbp			160	0
AK133228	uc007vdl			145	0
Tcte2	AK005879	HGC	1.11	237	0
	AK005673	HGC	1.15	271	0
	AK133065			153	0
	AK006813			0	0
Gnao1(AK160434)	uc009mvj	HGC	0.85	198	0
BC048579	uc009nyh			437	0
AK007041	uc007pwz			244	0
AK016386	uc008fue			214	0
AK077035	uc008fvx			141	0
AK016192	uc007ddy			128	0
	AK016392			115	0
	AK015801	HGC	1.11	176	0
AK007290	uc008xoq			116	0
	AK005637			0	0
	AK016816			112	0
	AK015579	HGC	0.98	191	0
	AK019721	HGC	0.83	363	0
	AK016323			0	0
AK018946	uc007kqq			110	0
AK030448	uc008wpt			252	0
	AK080629			224	0
	AK133004			233	0
AK005987	uc008rtx			204	0
AK007274	uc009rsq			213	0
AK015051	uc007gyb			230	0
AK015279	uc007tgb			153	0
	AK016082			0	0
AK131776	uc007nmk			129	0
	AK016458	HGC	0.95	260	0
AK005679	uc007nwx			100	0
	AK133257			219	0
	AK006898			107	0
AK133010	uc008syd			197	0
	AK015676			126	0
AK076914	uc007phy			0	0
	AK017041			0	0
	AK007220			107	0
	AK005835	HGC	1.02	210	0
	AK015237	HGC	1.29	386	0
AK076987	uc008rvd	HGC	0.99	220	0
AK005951	uc007jff			247	0
	AK017377	HGC	1.02	184	0
	AK007124			106	0
	AK017099	HGC	0.99	243	0
1700129I04Rik	uc009idd	HGC	0.88	251	0
EG545391	uc007duw	HGC	0.78	0	0
	AK015943	HGC	1.07	215	0
AK015664	uc007zre			109	0
AK076947	uc007uiz			133	0
	AK006312			102	0
AK016028	uc009jhd			158	0
AK135688	uc009tig			0	0
	AK006156			160	0
AK019789	uc007zqx			158	0
	AK015287			128	0
	AK005763	HGC	1.14	171	0
	AK006821			102	0
	AK019659			121	0
AK007460	uc009lda	HGC	0.98	208	0
	AK017062			252	0
AK132929	uc008ehu			134	0
AK019836	uc008oht			150	0
AK011222	uc008dte			186	0
	AK007040			0	0
	AK045655			0	0
	AK016330			132	0
	AK006305			138	0
AK039347	uc008sdd	HGC	1.05	446	0
	AK019606			118	0
AK077163	uc009msd			216	203
	AK076684			102	0
	BC048603			138	0
	AK015456			101	0
BC048584	uc009pah			173	0
	AK015821			170	0
AK016332	uc009nyg			437	0
	AK030101			133	0
AK006380	uc009mce			0	0
AK029875	uc009mcf			0	0
1700037C18Rik	uc007xyx	HGC	0.72	224	0
AK006980	uc009nbb			0	0
	AK029564			0	0
AK132084	uc008pdl			0	0
AK006293	uc007vbx			153	0
AK015900	uc007qpo			188	0
	AK018667	HGC	0.87	102	147
AK015944	uc007gyt			126	0
	AK018857	HGC	0.9	203	0
	AK006785			0	0
	AK020290			139	0
	AK044555			156	0
AK029768	uc007qeb			119	0
	AK015656	HGC	0.78	247	0
AK006308	uc009bsg			0	0
AK007151	uc007tcc			153	0
AK019541	uc007jjw			0	0
	AK015128			128	0
AK015937	uc007utz			153	0
AK020829	uc009ngb			135	0
	AK015849			0	0
	S49663			118	0
AK040104	uc007vyr			0	0
	AK019668			0	0
Serf1	uc007rqe	HGC	1.02	284	0
AK015488	uc008qmt			0	0
AK015408	uc007qbc			136	0
AK161337	uc009fxb			140	0
AK016007	uc009dfe			213	0
AK076949	uc008zhc			0	0
	AK016472	HGC	0.73	308	0
	AK131761			437	0
BC048761	uc009mmp			176	0
AK030268	uc007bys			118	0
	AK016124			107	0
	AK014883			137	0
	AK019635			122	0
	AK016698			309	0
	AK015862			0	0
	AK006261	HGC	0.82	153	0
mKIAA0998	uc007ohm	HGC	0.99	0	0
AK015079	uc007nuu			155	0
	AK005683	HGC	0.84	119	0
AK005580	uc009lty			159	0
	AK006404	HGC	1.11	149	0
	AK015296			201	0
	AK006550			205	0
	AK019707			0	0
AK076672	uc009qwk			143	0
	AK014930			167	162
AK079798	uc008etf			0	0
AK133391	uc009gxl	HGC	0.93	198	0
AK076929	uc007eej			127	0
	AK006948	HGC	0.8	230	0
	AK019761			0	0
AK015475	uc007slx			102	0
AK006245	uc008xnz	HGC	1.1	240	0
	AK077207			309	0
	AK016127			153	0
	AK015106	HGC	1.13	154	0
AK019798	uc008ybx			153	0
	AK007213			141	0
	AK007219			114	0
AK077175	uc009qzb	HGC	1	0	0
AK005744	uc007dzu			202	0
AK147860	uc009mzf	HGC	0.92	197	0
	AK016899			0	0
AK015198	uc007tju			156	0
	AK015850	HGC	1.38	186	0
	AK133453			244	0
	AK016736			159	0
	AK016174			0	0
	AK132855	HGC	0.91	181	0
	AK079918	HGC	1.09	224	0
AK021127	uc007kvt	HGC	0.94	166	162
	AK015294			179	0
AK015004	uc007nub	HGC	0.85	225	0
	AK018878			117	0
	AK015693	HGC	1.01	205	0
AK077166	uc009mqw			233	0
	AK016878			134	0
	AK007003	HGC	0.82	219	0
	AK018218			181	0
1700020N01Rik	uc007eos			215	0
AK015566	uc007ojx			129	0
	AK033866	HGC	0.85	170	162
AK014951	uc009rnw			0	0
AK076389	uc008irj	HGC	0.82	141	0
CKLF6	uc009nae	HGC	0.83	247	0
AK015891	uc009qzq			155	0
AK076847	uc007uqj			134	0
	AK006966			104	0
	AK015300			120	0
	AK085581	HGC	0.87	243	0
	AK015465			127	162
AK005757	uc009eth	HGC	1.06	310	0
AK131678	uc008kcr			0	0
4933409K07Rik	uc008ski			0	0
AK005591	uc007ukb	HGC	0.86	186	0
	AK005750			257	0
AK005600	uc008wti			183	0
	AK041587			0	0
	AK015189			0	0
AK007030	uc007bza			143	0
AK076583	uc008jep	HGC	1.06	249	0
	AK019716			138	0
AK020205	uc008thh			0	0
	AK005985			0	0
4930479M11Rik	uc009gfv			196	0
Gprc2a-rs5	NR_004441			142	0
	AK006795			159	0
BC048612	uc008rva	HGC	0.82	166	0
	AK015372			0	0
	BC048582			100	0
	AK007113	HGC	1.22	179	0
	AK015985	HGC	0.96	243	0
	AK017133			207	0
	AK016122			0	0
	AK042044			0	0
AK005667	uc009ijo	HGC	0.92	149	0
	L09047			0	0
	AK015352			121	0
	AK016397	HGC	1.05	229	0
	AK015636			186	0
AK007092	uc007mcb			152	0
AK016345	uc008mbl			110	0
	AK016142			112	0
AK015792	uc007srs			141	0
AK086288	uc007njj			0	0
AK078103	uc007zhj			0	0
	AK009506	HGC	0.99	189	138
	AK030945			0	0
AK039104	uc007lxk	HGC	0.93	134	0
	AK015812			156	0
	AK016096			102	0
AK085818	uc007nwl			0	0
AK132982	uc007vih			126	0
AK019643	uc008uuw			164	0
AK014841	uc007izb			126	0
	AK006015			277	0
AK076796	uc008rnz			0	0
	AK012985			0	0
	AK131765	HGC	1.04	184	0
AK017104	uc008tgd			189	0
	AK029296	HGC	0.9	242	0
AK015560	uc007vxp			210	0
AK019751	uc008aew			107	0
AK016734	uc008xrt			122	0
AK133035	uc007jkk			172	0
	AK005595			229	0
	AK005767			131	0
AK131821	uc008tiy	HGC	1.05	156	0
	AK019615	HGC	0.86	249	0
	AK005986	HGC	0.93	204	0
	AK131672	HGC	1.26	330	0
	AK132899	HGC	1.05	255	0
	AK015459			184	0
AK016836	uc007rcr			133	0
Dia2(AK006102)	uc007uuc			117	0
	AK015398			142	0
	AK019651			242	0
AK006677	uc008urz			0	0
	AK015448			172	0
	AK016706	HGC	1.17	276	0
AK079709	uc009cff			186	0
AK076827	uc009bla			106	0
	AK015113			118	0
AK006930	uc008xsq			0	0
	AK016304			132	0
	AK016606			109	0
AK160158	uc007zzn			0	0
	AK015032			0	0
	AK019678			0	0
AK076706	uc008mbb	HGC	1.06	263	0
	AK016102			110	0
Ptbp2	uc008rdm	HGC	1.02	225	0
AK076657	uc008fny			115	0
	AK016604			0	0
	AK006872	HGC	0.96	169	0
	AK007026	HGC	0.96	177	0
	AK019765			0	0
	AK015093			121	0
	AK016925	HGC	0.8	153	123
BC099544	uc007uya	HGC	0.61	205	0
	AK041283	HGC	0.8	232	0
AK005657	uc007ryt			111	0
	AK006903			127	0
	AK015621			153	0
AK076722	uc007pbs	HGC	0.87	264	0
	AK015659	HGC	0.94	178	0
AK006561	uc009nru			0	0
AK016693	uc009jia	HGC	1.09	221	0
	AK005768			250	0
4930594C11Rik	NR_024017			136	0
BC048655	uc008xsr			149	0
Smap1	uc007amf			123	0
	AK083834	HGC	0.9	213	0
	AK019602	HGC	1.27	195	0
	AK161422	HGC	0.78	256	0
AK076755	uc008zuz			119	0
	AK030119			0	0
	AK005920	HGC	0.85	186	313
	AK016409	HGC	1.22	262	0
	AK133162			181	0
	AK016576	HGC	0.77	188	0
	AK006142			172	221
	AK052663	HGC	0.85	191	0
AK006572	uc008afq			124	0
AK010245	uc008sxm			0	0
	AK006838			0	0
	AK155508	HGC	0.66	0	0
	AK006237			0	0
DQ691258	uc008nbs			0	0
AK016594	uc009mzw			136	0
2810441K11Rik	uc008gqb	HGC	0.9	242	0
AK006304	uc007qxz			0	0
	AK007207			0	0
AK015493	uc009pwy			141	0
	AK018906			194	0
	AK019842			159	0
	AK016235	HGC	0.75	149	162
AK016580	uc007pwo			484	0
AK015914	uc007tgr			150	0
AK016032	uc009kfa			0	0
	AK017011			0	0
DDO(AK165344)	uc007exc			0	0
AK039020	uc008isw	HGC	0.88	0	0
	AK015637	HGC	0.87	393	0
	AK077098			104	0
	AK015433			113	0
	AK016769			159	0
AK006690	uc007iay			135	0
AK054042	uc007gkp			0	0
	AK017998	HGC	0.92	250	0
	AK015852	HGC	0.86	166	0
	AK019595			0	0
	AK019741			104	0
AK079662	uc008dex			0	0
	L09051			0	0
	AK006976	HGC	1.22	205	0
	AK017098			152	0
AK015818	uc007uvi			158	0
	AK007029	HGC	0.88	271	0
	AK002420	HGC	0.79	322	0
AK016682	uc007nig	HGC	1.11	214	0
Gtpbp2	uc008crv	HGC	0.8	262	0
	AK006417			104	0
	AK005824			0	0
	AK005752			0	0
	AK016653			168	0
	AK007111			345	0
	AK019720			114	0
AK015360	uc007zdf			138	0
AK015628	uc007ozg			309	0
	AK016022			107	0
	AK006047			113	0
	AK019644			0	0
AK016887	uc007lxt	HGC	0.92	0	0
AK014974	uc007nur			113	0
	AK016846			121	0
	AK132795	HGC	0.95	197	0
AK076661	uc009sbl	HGC	1.04	366	0
	AK014826	HGC	0.93	160	0
AK015289	uc007uwz			107	0
AK015703	uc008dfa			125	0
AK002860				107	0
	AK010802			218	0
	AK031079			0	0
	AK006697			103	0
BC100427	uc007rbs			399	0
	AK030377	HGC	1.07	177	0
AK153575	uc007zak			0	0
AK006461	uc007gjx	HGC	0.87	240	0
	AK030060			133	0
	AK016118			285	0
AK006240	uc007nan			168	171
	AK136184			0	0
	AK017066			144	0
	AK016186			158	0
	AK006955			0	0
AK076688	uc009qvk			0	0
	AK040480			0	0
AK082314	uc009kuc			0	0
	AK015994			0	0
AK007154	uc007wnj			175	0
	AK016164			0	0
Mapk10	uc008yjh			138	0
	AK007311			143	0
AK015712	uc009nga			189	0
AK015316	uc007upe			164	0
BC062821	uc008pmf			164	0
AK148282	uc009nxr			0	0
ENSMUSG00000052469	uc008amf			0	0
	AK019763			104	0
	AK019805			102	0
	AK016308	HGC	0.8	172	0
	AK016144			139	0
	AK015326			104	0
	AK019609			0	0
	AB160648			0	0
	AK016126			142	0
	AK019581			282	216
AK087209	uc007anc			0	0
	AK015390			173	0
	AK015283	HGC	1.03	233	0
AK005616	uc008umk	HGC	0.86	171	0
	AK015927			0	0
	AK006928	HGC	1.17	226	0
AK076716	uc008ljh	HGC	0.73	308	0
Ypel1	uc007yjw	HGC	1.07	213	0
	AK015253			123	0
	AK029702			207	0
AK076817	uc008sae			116	0
	AK019571			381	0
	AK004326			0	0
	AK016044			215	0
	AK015660			207	0
	AK015962			222	0
	AK016911	HGC	0.77	247	0
	AK080704			101	0
	AK003944			0	0
	AK032526			0	0
	AK006165			263	0
	AK007160			0	0
	AK007271			250	0
AK005641	uc008sbh			0	0
AK135932	uc007akd			0	0
	AK087434			305	0
Drctnnb1a	uc008wqw	HGC	0.91	196	0
AK016280	uc008eud			152	0
AK017239	uc008jth			0	0
	AK019580			0	0
	AK017132	HGC	1.15	192	0
	AK084991	HGC	0.92	180	0
AK006937	uc007axl			0	0
Rp2h	uc009ssx			210	0
	AK015982	HGC	0.93	286	0
AK005895	uc009bfg			147	0
	AK016992			138	0
	AK016932			183	0
	AK029895			174	0
	AK014875	HGC	0.65	160	0
	AK015278			0	0
	AJ409467			0	0
	AK015140			0	0
	AK131689			132	0
	AK016055			0	0
	AK016962			155	0
	AK082424	HGC	0.94	200	0
	AB047759			215	0
AK016658	uc008xdq			139	0
AK006397	uc009ibe			133	0
	AK015439	HGC	0.8	215	0
AK006730	uc007zyy			113	0
Hdrpa	uc007niz	HGC	1.19	221	0
AK005608	uc007xax	HGC	0.91	208	0
AK052888	uc009azl			111	0
	AK132893	HGC	1.02	240	0
	AK014034			0	0
	AK007099			0	0
	AK016858			0	0
	AK006913			109	0
	AK076721	HGC	1.1	247	0
AK029643	uc007zqp			240	0
AK076845	uc007hha			704	0
AK033819	uc009pll			102	0
	AK039489			0	0
AK029692	uc007gvg			129	0
	AK015514			0	0
	AK006912			137	0
AK015810	uc008ocf			230	0
	AK006665			0	0
AK154225	uc007ybf	HGC	0.83	295	0
AK019620	uc008iaa			136	0
AK076683	uc008iaz	HGC	0.93	200	0
AK005828	uc008oom			105	0
	AK015798			0	0
	AK016735			122	0
AK077682	uc007hip	HGC	0.76	237	0
AK030117	uc009hrh			179	0
TCRB	uc009bnv			0	0
AK138592	uc008wre	HGC	0.77	162	0
	AK015723			0	0
AK005856	uc007qcc			130	0
	AK007127			0	0
AK016372	uc009sdj			186	0
	AK015804			118	0
	AK007172			0	0
	AK015030			144	0
	AK019771			116	0
AK076954	uc009lzq			120	0
	AK006761			199	0
AK050197	uc007nus			0	0
	AK006721			0	0
	AK019696	HGC	0.85	231	0
	AK035884	HGC	0.95	236	0
	AK019618	HGC	1.02	254	0
AK087744	uc007btl			0	315
AK019585	uc009elp			115	0
AK077029	uc009rxc			0	0
AK017111	uc008vss			0	0
AK076906	uc008yik			115	0
	AK161360	HGC	1.11	0	0
AK131742	uc009rha			127	0
	AK161453	HGC	0.92	197	0
	AK006792			118	0
	AK006945			211	0
	AK006390			212	0
AK053994	uc009cjc			119	0
	BC003765	HGC	0.84	244	0
	AK036704	HGC	0.89	215	0
	AK019646			0	0
	AK006865			0	0
AK015421	uc007bfg			103	0
	AK040091	HGC	0.71	142	0
	AK015735	HGC	1.11	291	0
AK029503	uc007els			151	0
	AK016871			119	0
	AK016453			129	0
	AK016405			112	0
AK140089	uc009phk			0	0
AK076734	uc008rjv			118	0
	AK015663	HGC	1.38	186	0
AK012214	uc007qbw			132	345
AK018940	uc008ods			178	0
	AK017892	HGC	0.8	209	0
	AJ409473			0	0
	AK039921			343	0
BC100303	uc007btk			0	315
	AK015386			0	0
AK081104	uc008rsi			142	0
	AK015643			0	0
AK132681	uc007xaz	HGC	0.91	208	0
AK015552	uc008nkw			0	0
	AK008051			257	0
AK015581	uc007hed			0	0
	U72677			0	0
	AK137467	HGC	0.79	168	0
	AK016877			201	0
	AK078013	HGC	0.7	207	0
	AK016287			139	0
AK006943	uc009erm			159	0
	AK002941	HGC	1.26	258	0
	AK016256	HGC	0.98	220	0
	AK006235	HGC	1.09	284	0
	AK019607			136	0
	AK076971			0	0
	AK015759			106	0
	AK015130	HGC	0.95	336	0
	AK016047			0	0
AK014147	uc009pai	HGC	0.74	108	0
AK137133	uc009cnu			0	0
	AK016944			146	0
AK019628	uc007dat			111	0
	AK077193	HGC	0.88	215	0
	AK013501			165	162
AK029959	uc008dvr			132	0
AK076842	uc009eta			139	0
AK076808	uc007diu			185	0
AK082325	uc007xgz			182	0
	AK020967	HGC	0.95	244	0
	AK038433	HGC	1.09	160	0
	AK030270			209	0
	AK006636			114	0
	AK016367			0	0
AK019812	uc008jqx			0	0
	BC039874	HGC	0.64	0	0
	AK016541			129	0
	AK088235	HGC	0.95	260	0
	AK016152			125	0
AK041042	uc009jvm	HGC	0.85	273	0
	AK015794	HGC	0.93	200	0
	AK131677	HGC	0.97	236	0
AK043252	uc007vyl	HGC	0.94	149	0
AK016343	uc009jjs	HGC	0.84	201	0
4930584F24Rik (uc012dtp.1)	AK015867			183	0
Fsd1l	uc008sxd	HGC	1.11	179	0
AK007854	uc007zzm			0	0
	AK015859			0	0
AK015219	uc007nko			236	0
	AK015305			135	0
	AK029749			204	0
AK003327	uc007apm			0	0
	AK012078			0	0
	AK016684			117	0
	AK006616	HGC	0.85	231	0
	AK131685			0	0
	AK017064			126	0
Pax6os1	NR_002867	HGC	1.12	0	162
	AK016750			126	0
	M24318			0	0
	AK015070			0	0
	AK015639	HGC	0.84	217	0
	AK012965	HGC	1.04	216	0
	AK015382			144	0
AK007116	uc009pqw			0	0
	AK015358			0	0
	AK021380			0	0
	AK006109			112	0
	AK076950	HGC	0.96	287	0
AK039403	uc008gue	HGC	0.79	147	0
	AK046275			0	0
	AK077182			159	0
	AK145513			0	0
AK076771	uc007fov	HGC	1.01	188	0
	AK015246			102	0
AK019729	uc009ogf			153	0
AK145430	uc007obl	HGC	0.93	220	0
	AK009418			0	0
	AK016552			145	0
	AK015234	HGC	0.75	155	0
Dscaml1	uc009pfx	HGC	0.68	144	0
	AK016019			155	0
	AK046905	HGC	0.97	320	0
AK079017	uc007mwe			0	0
	AK048826	HGC	0.94	249	0
AK080070	uc009nic			0	0
BC048594	uc008lli	HGC	0.95	215	0
	AK015765			0	0
	AK030081			0	0
	AK008257	HGC	0.83	181	0
	AK076537	HGC	0.81	263	0
	AK029924			143	0
	AK015638			178	0
AK013046	uc007bgw	HGC	1.1	206	0
	AK016360			130	0
AK076976	uc007qzr			0	0
AK087351	uc007rjm	HGC	0.76	0	0
	AK134149			0	0
AK040197	uc008hrl	HGC	0.91	367	0
	AK005910	HGC	0.98	241	0
AK076965	uc009fxc			140	0
AK079034	uc008xkk	HGC	1	224	0
AK016496	uc008xdw			175	0
	AK007362			168	0
	AK016382			0	0
	AK164224			0	0
	AK019784	HGC	0.94	188	0
	AK021219			152	0
AK005833	uc007srf			229	0
	AK016987			173	0
	AK019584			136	0
	AK133367			212	0
	AK016003			0	0
	AK006719			126	0
	AK016106			139	0
AK043982	uc007xwu			0	0
	AK015845			0	0
AK133155	uc009bhe			110	0
	AK085521	HGC	0.69	180	0
	AK030036	HGC	0.93	374	0
	AK015152			0	0
AK052812	uc008hrb			133	0
	AK133305			169	0
	AK015816			0	0
	AK006860			127	0
Metap2	uc007gvf			129	0
	AK030072			236	0
	AK017135			116	0
	AK046472			0	0
	AK016587			107	0
	AK017004			182	0
	AK015774			108	0
AK086460	uc007zey			297	0
AK132765	uc009iiu			135	0
AK160141	uc007zaa	HGC	1.29	291	0
	AK014816	HGC	0.75	216	0
St3gal6	uc007znw	HGC	0.8	176	162
	AK015521			0	0
	AK042171	HGC	0.88	246	0
	AK082127	HGC	1.15	219	0
AK015528	uc007dfk			173	0
	AK016051			166	0
	AK161332	HGC	0.95	336	0
Unc5cl	uc008cyc			101	0
AK157878	uc009mlj	HGC	0.9	212	0
AK012547	uc008swi	HGC	0.91	287	0
	AK015451			0	0
	AK006620	HGC	0.91	236	0
	AK017123			0	0
	AK161715			145	0
	AK016233			148	0
	AK014867			112	0
	AK085506	HGC	1	250	0
	AK007196			144	0
	AK007778			0	0
AK131819	uc008uhc	HGC	0.96	848	0
	AK015983			0	0
8430427H17Rik	uc008nhw	HGC	0.94	272	0
AK133142	uc007dxm			0	0
	BC048919			0	0
	AK016402			0	0
	AK020896			0	0
AK004585	uc007nkz	HGC	0.92	207	0
BC048765	uc007vop			105	0
	BC059101			209	0
AK038711	uc007uzp			0	0
	AK016806	HGC	1.3	346	0
	AK041974	HGC	1.03	138	0
AK078191	uc009hfa			0	0
	AK019705			0	0
	AK036265	HGC	0.84	233	0
	BC052793	HGC	1.29	291	0
	AK015836			0	0
	AK006066			125	0
AK076892	uc008bbh			0	0
AK016307	uc007xol			203	0
AK033854	uc009ecs			0	0
	AK015909			128	0
	AK007090	HGC	0.9	192	0
	AK016253			134	0
E130201H02Rik	NR_024324	HGC	0.97	123	240
	AK015054			0	0
AK157218	uc008mgp			0	0
Gm15698	NR_003564			0	0
1700021P22Rik	uc009gps	HGC	0.82	263	0
	AK006689			107	0
AK039238	uc008pkk			0	0
	AK086739			112	226
	AK016862	HGC	0.95	208	0
AK012226	uc007sly			0	0
	AK076564			0	0
AK010129	uc007vqk	HGC	0.95	108	0
uc009igm	AK157435			0	0
AK029857	uc008wpr			252	0
DQ715729	uc009dqv	HGC	1.01	235	0
	AK019555			107	0
AK133438	uc009gih			122	0
AK020919	uc007ype			0	0
	AK007900	HGC	1.1	180	0
AK019036	uc007zzo			0	0
	AK046601			216	0
	AK040987			0	0
AK007770	uc009cya			226	0
	AK046572			0	0
	AK015880			0	0
	AK016366			166	0
AK133017	uc009lgd			208	0
	AK005783			105	0
AK038880	uc009jgv			0	0
	AK018848			142	0
	AK041002			170	0
	AK015815			0	0
AK015665	uc008ljw			0	0
	AK050462			0	0
AK036535	uc007gst			0	0
	AK007179			195	0
AK007083	uc009bfb	HGC	0.97	0	0
	AK007275	HGC	0.96	200	0
	AK020166	HGC	0.9	220	0
	AK040512			0	0
AK086006	uc008hbv			0	0
	AK015531			0	0
	AK005575	HGC	0.95	261	0
	AK007252			112	0
	AK016999			128	0
	AK015503			0	0
	AK031914	HGC	1.05	240	0
	BC067070	HGC	0.9	250	0
	AK133430	HGC	1.04	234	0
	X99253			233	0
	AK018281			0	0
	AK007008			145	0
AK029726	uc009kfx			251	0
AK028094	uc007ujf			113	0
	AK086609			0	0
AK087392	uc007ief			112	0
	AK034331	HGC	1	318	0
	AK080622	HGC	0.99	232	0
AK085365	uc007gsq	HGC	0.75	207	0
AK017010	uc009mhs	HGC	1.05	281	0
	AK019692	HGC	1.09	281	0
AK006961	uc008zrv			127	0
	AK016240			437	0
1700008J07Rik	NR_024331	HGC	0.99	207	0
	AK020901			0	0
	AK016379			153	0
	AK006204			0	0
	AK013802			0	0
AK006510	uc008vgs			247	0
AK144886	uc007ohq			0	0
AK079018	uc007flp			113	186
AK161480	uc007ymw			185	0
	AK006277			262	0
AK080223	uc009lmi			0	0
	AK006675	HGC	0.91	324	0
	AK015425			145	0
AK019688	uc007epv			114	0
AK163252	uc008nlv	HGC	0.71	280	0
	AK044604	HGC	1.37	197	0
AK016417	uc009blh	HGC	1.03	308	0
AK076938	uc007gzq			149	0
	AK144519	HGC	0.82	0	0
	AK079625			0	0
DQ687153	uc008skp			0	0
	AK086314			0	0
	AK028736			0	0
	AK045234			0	0
AK012238	uc009ptw	HGC	0.92	228	0
BC048666	uc008fec			173	0
AK046045	uc009igl			0	0
Eif4g3	uc008vjw	HGC	1.05	255	0
	AK016692			116	0
	AK015206	HGC	0.9	220	0
AK047145	uc007tcs			0	0
	AK016008			0	0
	AK007232			0	0
AK019057	uc008ybr			121	0
	AK016725	HGC	0.86	330	213
	AK015353			104	0
	AK133189	HGC	1.1	212	0
AK016730	uc007bup			0	0
AK158295	uc009hbb	HGC	0.86	166	0
AK179786	uc007nsi	HGC	1.03	233	0
AK019679	uc008kjs			164	0
AK006250	uc008bdb	HGC	0.93	175	0
	AK015461	HGC	1.01	274	0
AK019667	uc007taa			155	0
	AK016922	HGC	0.92	169	0
	AK034626	HGC	1.09	183	0
AK131759	uc007ygb			0	0
	AK015180			152	0
	AK006722			119	0
AK006651	uc008qgc	HGC	0.82	172	0
	AK014902	HGC	1.01	156	0
AK163488	uc009tih			0	0
	AK019754			0	0
	AK162444			134	0
	AK016119			183	0
	AK016261			0	0
Catsper2(AK142380)	uc008lyy	HGC	0.91	104	0
	AK029748			108	162
AK052792	uc008qtn			0	0
	AK015084			236	0
	AK014962	HGC	1.09	238	0
	AK017047			0	0
	BC030033			0	0
	AK132559			129	0
AK046440	uc008oue	HGC	1.25	245	0
	BC054063	HGC	1.03	150	163
	AK015127			139	0
AK089615	uc008gyv			0	0
AK039780	uc007boy	HGC	0.68	0	130
	AK007104	HGC	1.07	386	0
	AK016970			0	0
AK040806	uc007vcq			0	0
	AK014830	HGC	1.03	168	0
	AK219183			0	0
Gm568	uc008suh			121	0
AK158658	uc007dua			0	0
	AK013313	HGC	1	296	0
AB041800	uc008zeh	HGC	1.12	181	0
	AK018780			248	0
	AK046652	HGC	1.24	228	0
AK040733	uc009qzd	HGC	1.08	176	0
	AK006003			124	0
	K03466	HGC	0.85	163	125
AK013680	uc007ici	HGC	0.91	232	0
1700012B15Rik	uc007mwk	HGC	1.16	273	0
TCR-beta chain	uc009bpq			0	0
	AK016108	HGC	0.85	294	167
	AK006784	HGC	0.79	242	0
AK076774	uc007ktf			0	0
	AK007217			134	0
AK038391	uc007psy			0	0
AK161431	uc008mms			182	0
	AK006299			176	0
AK016841	uc009nur			0	0
	AK015975			283	0
	AK016029			124	0
	AK134561			0	0
	AK006267	HGC	0.93	301	0
AK016388	uc008pib	HGC	1.15	192	0
Zfp389	NR_026798			174	0
	AK007004			132	0
	AK015974			114	0
AK041437	uc008evn			0	0
	AK029583			0	0
	AK010838	HGC	0.95	208	0
	AK044580	HGC	0.79	126	0
	AK006506	HGC	0.83	256	0
	AK016143			121	0
	AK017083			148	0
	AK006298	HGC	0.94	170	0
AK008705	uc009mlp	HGC	0.86	152	0
	AK051225			0	0
AK019631	uc008vpq			126	0
	AK015569			0	0
	AK040358	HGC	0.91	208	0
	AK030193			148	0
AK015782	uc008aet	HGC	0.99	213	0
	AK007120			0	0
	AK015623			183	0
DQ697944	uc008smn			0	0
AK019563	uc009msc			104	0
	AK015601			143	0
AK019031	uc007van			224	0
AK019824	uc009oso	HGC	1.36	222	0
	AK016157			140	0
	AK006642	HGC	1.12	177	126
	AK035449			0	0
AK006454	uc009auq	HGC	1	168	0
	AK006574			111	0
	AK007117	HGC	0.84	181	0
AK006413	uc008xmo			218	0
AY512912	uc008sxl			0	0
	AK078497			0	0
	BC038629			0	0
AK040752	uc007ktl	HGC	1	289	0
	AK033633	HGC	1.04	199	0
AK043991	uc007nmi			102	206
	AK015443			153	0
U83175	uc009den	HGC	0.88	172	0
AK030154	uc008xka			131	0
AK076988	uc007rxs			130	0
	AK161816			135	0
	AK019642			142	0
	AK014121			101	0
	AK016455	HGC	0.92	180	0
	AK076825			0	0
AK197603	uc009roa			0	0
AK030357	uc008mcd			123	0
	AK006090			0	0
AK079818	uc008ftc			0	0
	AK015743	HGC	1.32	176	0
	AK012876			0	0
AK131696	uc009exx			174	0
AK076358	uc009fxk			214	0
	AK039212			0	0
4930520O04Rik	uc009rxf	HGC	0.95	208	0
AK086168	uc007ypf			0	0
	AK170065	HGC	0.82	189	0
ErT-1	uc007wgd			158	0
	AK146114	HGC	0.96	239	0
AK076668	uc008iba	HGC	0.93	200	0
	AK015450			122	0
TCR-beta chain	uc009bpv			0	0
	AK043475	HGC	0.93	301	0
AK048798	uc007nws	HGC	0.95	153	0
	AK032771			0	0
	AK020850	HGC	1.03	215	0
	AK015342			0	0
etoile	uc007wbg			0	0
	AK015835			216	0
Ifltd1	uc009erk			134	0
	AK037080			0	0
Spg3a	uc007ntd			0	0
	AK006100	HGC	1.32	182	0
	AK081192			0	0
	AK006956	HGC	1.04	193	0
	AK030271			0	0
	AK017078			0	0
4930426L09Rik	NR_024323	HGC	0.9	291	0
AK153212	uc007wgq			0	0
AK143789	uc008lgb			0	0
	AK013113			0	0
	AK015120	HGC	1.04	268	0
AK081788	uc008fxu			0	0
AK076853	uc008xgw			118	0
	AK045080			0	0
	AK016314			115	0
	AK006682			232	0
AK019697	uc007gxe			135	0
AK019743	uc008uvv	HGC	1.01	265	0
mKIAA1238	uc009dpe			176	0
	AK006130	HGC	0.86	218	176
AK015762	uc008qdl			148	0
	AK015297	HGC	0.83	189	0
	AK006399	HGC	0.95	284	0
AK037830	uc008ahw	HGC	0.97	257	0
	L09009			0	0
TCR-beta chain	uc009bpu			0	0
AK006071	uc008xwg			0	0
U89428	uc009grb			0	0
Defb42	uc007uhg			0	0
AK038386	uc008qru			0	0
AK076883	uc009beq	HGC	0.99	180	0
	AK016440			132	0
AK045385	uc007uxx			0	0
AK160437	uc007zzp			0	0
	AK015168			140	0
	AK051241			0	0
AK016383	uc007evj			0	0
	AK207509			0	0
	AK003348			0	0
BC054394	uc008nzg			128	0
	AK053940			219	0
AK040992	uc009bas			0	0
AK076959	uc007zqw			234	0
	AK020381	HGC	0.72	190	0
	AK007248			114	0
	AK016969			0	0
AK202580	uc009did			0	0
2310047D13Rik	uc007kff	HGC	0.76	317	0
AK007042	uc007mfi			0	0
	AK016200	HGC	0.77	153	0
	AK036852			115	0
Psme3	uc007lom	HGC	0.84	317	0
	AK006220			0	0
AK016177	uc007bax	HGC	1.04	238	0
	AK010155	HGC	0.82	132	0
AK140370	uc008lgr			0	0
AK040276	uc007kve			0	0
	AK015613			103	0
Gt(ROSA)26Sor	NR_027010	HGC	0.88	172	0
AK132885	uc009nck	HGC	0.85	246	126
	AK015244			0	0
	AK034101			0	0
	AK084937			0	0
	AK088428	HGC	0.98	206	0
AK030052	uc007qug			138	0
	AK131801			155	181
	AK015044			119	0
	AK082339	HGC	0.8	131	0
AK019844	uc007cwa			120	0
	AK031826	HGC	0.82	103	130
	AK133080	HGC	0.98	289	0
AK161402	uc008hbx			133	0
	AK016050			115	0
Antxrl	uc007tah			191	0
AK030453	uc008mlw			0	0
AK035706(HOTAIR)	uc007xwx			0	0
	AK006297			0	0
Prlr	uc007vfv			140	0
AK133134	uc007nbb			105	0
1700022A21Rik	NR_003953			180	0
AK052881	uc008sec			113	0
	AK021053			0	0
	AK018973			130	0
	AK042866	HGC	0.8	370	0
	AK006833			111	0
AK015395	uc008fuc			117	0
	AK007225			202	0
	AK030164	HGC	0.98	195	0
	AK013809			0	0
	AK015951			175	0
	AK019562	HGC	1.15	272	0
BC058545	uc007lzt	HGC	1	252	0
	AK079790			0	0
AK080151	uc007phg			0	0
AK042933	uc008yai			0	0
AK049264	uc008zex			0	0
	AK040401	HGC	0.83	254	0
	AK015242			121	0
	BC100512			133	0
	AK050124			0	0
AK033000	uc007nrn			0	0
AK034417	uc007uxv			101	0
	AK016203			0	0
AK042010	uc008mhq	HGC	0.99	250	0
AK006958	uc008iem			122	0
	AK019349			0	0
AK015094	uc007kxe			107	0
AK219417	uc007bdt			0	0
	AK089876			0	0
AK007255	uc008sac	HGC	0.99	301	0
	BC025014	HGC	0.85	0	0
	AK019652			0	0
	AK049966			156	0
AK019375	uc008ucu	HGC	0.76	165	141
	BC023886	HGC	0.86	189	0
	AK017077			165	0
	AK020111			0	0
AK135894	uc008rkb			0	0
AK015526	uc007meg			159	0
	AK046349	HGC	0.79	243	193
Zcwpw2	uc009rzf			0	0
	AK080300	HGC	1.05	0	0
	AK041289	HGC	1.11	214	0
	AK006880			129	0
TCR-beta chain	uc009bpy			0	0
	AJ308964			0	0
	AK016139			256	0
	AK138158	HGC	1.1	225	0
	AK018999	HGC	0.93	272	0
AK140218	uc008cad	HGC	0.79	242	0
AK086793	uc008sjb			0	0
AK005849	uc009gkw			116	0
	AK047741	HGC	0.96	323	0
	AK044811			0	0
	AK019739			0	0
	BC002209	HGC	1.31	0	0
	AK052984	HGC	1.13	110	125
AK016128	uc009lrw			123	0
	AK006010			190	0
	AK016151			169	0
C030017K20Rik	uc008wdm			0	0
AK046150	uc007umh	HGC	1	167	0
Gm628	uc007wcl			192	0
	AK020520			0	0
	AK158485			0	0
AK020645	uc007cpy			0	0
AK051804	uc009evj	HGC	0.96	380	0
Slc25a38	uc009scb	HGC	0.88	425	0
AK005793	uc007vgq	HGC	0.87	279	0
4931428F04Rik	uc009nch	HGC	0.85	246	0
	AK047499	HGC	0.83	254	0
	AK076620			0	0
	AK021085			0	0
	AK029560	HGC	0.92	236	0
	AK006714	HGC	0.86	205	0
AK021007	uc009ihq	HGC	0.74	167	0
	AK016717			0	0
	AK142341			202	0
AK035573	uc007eyw			0	0
AK007312	uc009fcd	HGC	0.81	180	0
	AK031091			0	0
	AK046914			135	0
	AK080548			104	0
	AK080390	HGC	1.05	198	0
AK143957	uc008ibo	HGC	0.96	236	0
	AK020380	HGC	1.09	251	0
	AK016196	HGC	1.04	159	0
	AK048225			112	0
AK085881	uc007vow	HGC	1.07	306	0
AK085477	uc007krk	HGC	1.13	222	0
AK147079	uc007kxd			0	0
AK076978	uc008hoq	HGC	0.86	199	0
	AK010100			0	0
	AK009534			0	0
AK016521	uc007zfw	HGC	0.84	203	0
AK144882	uc008say			135	0
AK003943	uc007kuh			0	0
	AK043615			105	0
AK009603	uc009akc	HGC	1.01	335	0
Rab22B	uc008dgi	HGC	0.89	213	145
AK019889	uc008kbz			0	0
	AK089117			0	0
AK016790	uc009vgj			0	0
AK019598	uc008dft			327	0
	AK076659	HGC	0.98	251	0
AK076700	uc007lpy			146	0
	AK006989			141	0
	AK052417			0	0
AK006973	uc007nny	HGC	1.03	259	0
AY512917	uc009jaz			0	0
AK019757	uc008jiw	HGC	0.99	179	0
	AK014993	HGC	1.08	252	0
AK087313	uc008hli			0	0
	AK006396	HGC	1.16	301	0
	AK028839			0	0
AK044020	uc008wps			252	0
	AK170699			0	0
AK144299	uc007zsi			129	0
	AK016894			0	0
B130050I23Rik (AK009699)	uc009ktf			160	0
	AK016834			0	0
	AK018874	HGC	1.01	350	0
AK148373	uc009ipj	HGC	0.86	204	0
	AK015420			107	0
	AK015040			109	0
AK084200	uc007xka			111	0
BC065777	uc007myx	HGC	0.83	151	209
	AK145188	HGC	0.98	242	0
AK086010	uc009jts			230	0
AK160260	uc008uqs			206	0
	BC051511			126	0
	BC028810	HGC	0.97	267	0
AK006702	uc009lhk			104	0
	AK018903	HGC	1.05	198	0
BC051525	uc008unk			0	0
AnMKRN1	uc009blv	HGC	1.11	257	0
	AK153660	HGC	0.92	348	0
	AK087461	HGC	0.85	221	0
	AK078603			275	0
	AK015822			137	0
AK206655	uc007hcl			0	0
AK039557	uc007qtg			191	0
	AK015407			129	0
AK167556	uc008hmg			0	0
AK015492	uc007znn	HGC	0.96	191	0
AK006001	uc008nvv	HGC	0.93	357	0
AK136039	uc007rgm			0	0
AK007898	uc007mmq	HGC	1.06	256	0
AK135675	uc009svq			0	0
	AK005840			112	0
AK047520	uc009pzg	HGC	0.86	233	0
	AK039686	HGC	0.8	269	0
	AK020838			192	0
AK085325	uc008pkm			0	0
	AK142189	HGC	0.86	157	0
	AK138162			220	0
	AK161442	HGC	0.81	151	0
AK133337	uc008ocj			290	0
	AK021082	HGC	0.92	292	0
	AK158492	HGC	0.94	254	0
AK007174	uc008ouc	HGC	0.91	227	0
	AK018860			0	0
	AK007141			127	0
	AK015571			0	0
	AK016293			0	0
	AK015597			149	0
	AK015648			0	0
	AK015734			132	0
	AK017009	HGC	1.03	434	0
	AK080501			108	0
	AK015175			0	0
AK080278	uc007wzq	HGC	1.01	0	0
	AK042711	HGC	0.95	303	0
	AK050225			0	0
Gm7337	NR_003652			157	0
	AK131699			0	0
	AK016875			206	0
	AK090142			179	0
1700049E17Rik	uc007tcy			0	0
	AK077345	HGC	1.04	299	0
	AK041029	HGC	0.78	220	0
	AK006816			119	0
	AK053789			0	0
	AK006836			0	0
	AK019510			0	0
	AK145034	HGC	0.83	190	0
	AK036853	HGC	1.09	300	0
	AK018199	HGC	1.13	0	205
art3	uc008ydj			0	0
	AK076393			164	0
	AK015416			215	119
	AK165035			215	119
AK017076	uc009mua	HGC	0.84	186	0
	AK016146			167	0
	AK032571			0	0

## Sheet: down-regulated
GeneSymbol	SeqID	Classfication	CpG O/E	H3K4me3(Score)	H3K27me3(Score)
H19	NR_001592			103	0
	AK035610			0	0
BC022590	uc008xov			0	0
Gm6498	NR_003630			0	0
AK149453	uc007ysq			102	0
	AK166199			0	0
	AK083943			0	0
	AK046232	HGC	1.03	152	176
	AK017612			0	0
AK031097	uc008pmi			0	0
	AK081837			0	0
	AK031521			0	0
	AK051797			0	0
	AK004447	HGC	1.09	151	183
D10920	uc008tfo			0	0
	AK031302			0	0
Rab42	uc007cnr			103	0
AK157178(Meg3)	uc007pap			116	181
Gtl2	uc007par			116	181
	AK018031			0	0
	AK031522			0	0
	AK052777			0	0
Airn	NR_002853	HGC	0.83	144	0
	AK049648			0	0
	AK051693			0	0
AK043032	uc009czd			0	0
	AK020136			0	0
	AK083529	HGC	0.88	103	0
	AK153559			0	0
	AK020712	HGC	1.04	144	0
Etd	NR_034074			0	0
	AK011429			0	0
	AK018053			0	0
	AK015151			0	0
Sat1	uc009urr	HGC	0.86	311	0
	AK030418			0	0
	AK014550			0	0
B930095G15Rik	uc007vab			0	0
	AK018512			0	0
	AK076338			0	0
	AK159300			0	0
BC048947	uc008ttn			0	0
AK089914	uc009mjn			0	0
	AK035407	HGC	0.67	0	0
	AK004108			0	0
AK051166	uc007zsd			0	0
	AK080872	HGC	0.77	133	0
	AK032146			0	0
	AK020229	HGC	0.85	142	0
	AK034008			0	0
	AK008743			0	0
AK090251	uc008xiv			0	214
	BC040515			0	0
	AK035091	HGC	0.96	118	135
	AK038304			0	0
	AK043471			0	0
AK008288	uc008elz			0	0
	AK020555			0	0
AK149000	uc007aev			0	0
AK080411	uc008xjc	HGC	0.93	124	0
	BC024137			0	0
	AK004353	HGC	0.89	149	162
	AK013766			0	0
BC029710	uc007axg			0	0
AK014683	uc009hiz	HGC	0.73	121	0
	AK012924			0	0
	BC055305			0	0
	AK077955			0	0
	AK031656	HGC	0.74	139	149
	AK164377			0	0
AK036616	uc008gmk	HGC	1.09	199	0
Dnase2a	uc009moc	HGC	0.87	0	0
AK031234	uc008uub			0	0
	AK020112			0	0
	AK089213	HGC	0.83	166	0
AK083195	uc009hfc			0	0
	AK171786	HGC	0.94	415	0
	AK038829			0	0
	AF061179			0	0
	AK035973			0	0
	AK138072			0	177
	AK029270			0	0
	AK045553			0	0
	AK038224			105	0
	AK052483			0	0
	AK053256			0	0
	AK028267			0	181
	AK044114	HGC	1.03	0	160
	AK051309			0	0
	AK089646			0	0
	AK020726			106	0
	AK032934	HGC	0.72	0	0
Meg3	NR_003633			0	0
	AK077891			0	0
	AK020212			0	0
AK035901	uc009hfd			0	0
	AK047377			0	0
	AK009920			0	0
	AK087080			0	0
AK038079	uc007xss	HGC	0.84	144	178
AY512909	uc009tie			114	0
AK164256	uc007msb	HGC	0.77	169	0
	AK017264			0	0
	BC002245			0	0
	AK164022			113	0
	AK083074			0	0
	AK018162			0	0
	AK021307	HGC	0.81	155	212
	AK054342	HGC	0.95	178	203
	AK011385			0	112
AK158055	uc009bio	HGC	0.99	224	0
	AK011250			105	235
	AK028958			0	0
	AK087429			0	0
	AK020430	HGC	0.97	110	0
	AK028635			0	0
BC019699	uc009uam			215	0
AK088966	uc007lmk			0	0
	AK018425			0	0
	AK053029	HGC	0.78	108	0
	AK162474	HGC	0.77	169	0
AK145301	uc007edt	HGC	0.93	162	0
AK177174	uc007hso			0	0
	AK134354			0	0
AK033245	uc009tyf	HGC	0.79	206	0
Airn	uc008ala	HGC	0.83	144	0
	AK077887			0	0
	AK020385			0	0
	AK012942	HGC	0.83	144	0
	AK041222			0	0
	AK084186			0	0
	AK047541			0	0
	AK045293			0	0
	AK030367			0	0
	AF177020			0	0
AK082250	uc009bjd			0	0
	AK017369			0	0
AK018352	uc008imv			0	0
	AK049981			0	0
	AK083863			0	0
BC028660	uc009adp			0	0
	AK041843			214	0
	AK034169			0	0
	AK017909			0	0
	AK035003			0	0
	AK038166	HGC	1.02	160	179
	AK028812			0	0
	AK017233			0	0
	AK013628			0	0
	AK036213			0	0
	AK085324			0	0
	AK079369			0	0
	AK048940			0	0
	AK045146			138	0
AK090061	uc009ulf			0	0
	AK013604			0	0
AK147321	uc007pas			116	181
	AK039302			0	0
	AK165856	HGC	0.93	264	0
	AK053547			115	0
	AK084616			0	0
	AK051651			154	0
	AK014219			0	0
	AK021285	HGC	1.03	148	0
	AK003497	HGC	0.82	166	178
AK083498	uc009fcv			0	0
	AK017720			0	0
Hltf	uc008osm	HGC	0.88	175	0
	AK030592			0	0
	AK035600	HGC	0.84	234	0
	AK038520			0	0
	AK052577			0	0
	AK017366			0	0
	AK034379			0	0
	AK033993			109	0
	AK033270			0	0
	AK032296			0	0
	AK031304			0	0
Rian	AB063319			0	0
	AK135255			0	0
	AK053007			0	0
	AK042106			0	0
AK020728	uc007pyl			0	0
	AK040017			0	0
	AK037356			208	0
AK011865	uc009pak			146	0
	AK049777			0	0
	AK088570			0	0
	AK082089			0	0
	AK003932			0	0
Osbpl3	uc009bxa			0	0
	AK164363			0	0
	AK140807			0	0
	AK014755			0	0
	AK172057	HGC	1.02	0	0
	AK047747			0	0
	AK043397			0	0
	AK166173			0	0
AK002390	uc008wqt	HGC	0.91	125	0
AK043847	uc007smc			0	0
AK029100	uc008akr	HGC	0.87	189	0
	AK005410	HGC	0.88	108	206
	AK053161			0	0
AK086087	uc009rze			119	0
	AK032904			0	0
	AK017498			0	0
	AK020576			126	0
	AK169946	HGC	0.92	439	0
6430411K18Rik	NR_002848			0	0
AK044526	uc008xjd	HGC	0.93	124	0
Rasgrp2	uc008giq			0	0
Ptn	uc009biz			0	0
	AK019103			0	0
	AK021240			0	0
	AK048959			0	0
	AK020501			0	0
	AK012483	HGC	1.23	255	0
	BC023710			0	0
	AK030345			0	0
	AK084995			0	0
	AK149068			0	0
Mdga2	uc007nro	HGC	0.92	143	149
	AK083489			0	0
	AK137112			0	0
	AK012089			194	0
	AK087259	HGC	0.71	212	149
	AK018648			0	0
	AK082703			166	0
	AK013488			0	0
	AK052957	HGC	0.73	142	0
AK020768	uc007djl			0	0
	AK038503			0	0
AK138088	uc007nsp			0	0
AK164124	uc009aml			173	0
	AK031752	HGC	1.05	215	0
AK079804	uc007bcl			187	0
Zf12	NR_003547			0	0
	AK042238	HGC	1	335	0
AK033378	uc007epr			0	154
	AK021264			0	0
	AK013025			138	0
	AK053132			0	0
	AK004333			0	0
	BC059079			0	0
	AK032719			0	0
	AK035243			0	0
	AK009626			144	0
AK144366	uc009kgh			125	0
AK163775	uc007hna			0	0
	AK132411			0	0
	AK032615			0	0
	AK054540			0	0
	AK042360			0	0
	AK087671			0	0
	AK032419			106	0
	AK078200			0	0
	AK045630	HGC	1.27	0	136
	AK047699			0	0
	AK014066	HGC	1.13	240	0
	AK086405			0	0
	AK044907			0	0
	AK020076	HGC	0.98	500	299
	AK014037			138	0
	AK046833			0	0
	AK013552			0	0
AK083203	uc008wbz	HGC	0.93	107	194
	AK044131			0	0
	AK048477			0	0
	AK014756			0	0
	AK082632			0	0
	AK021262	HGC	1.23	255	0
	AK017864	HGC	1.06	240	0
	AK082723	HGC	0.83	155	215
	AK046037			0	0
BC025054	uc007pyi			121	140
	AK085278	HGC	0.89	275	0
	AK033273			108	0
	AK029232			0	0
	AK038787			0	0
AK021075	uc008akv			0	0
	AK053118	HGC	0.88	352	0
AK081581	uc009tdo			0	0
	AK050726			0	0
	AK051886			0	0
	AK018604			0	0
	AK047489			0	0
	AK078589	HGC	0.95	181	265
	AK011210			0	0
AK003073	uc008cem	HGC	0.75	264	0
	AK148658			0	0
	AK156552			336	0
	AK046686			0	0
AK087569	uc008fmb	HGC	0.63	106	0
	AK017702			256	0
AK043766	uc009ual			215	0
AK083706	uc009nie			130	0
AK199358	uc008vch			0	0
AK135766	uc007koh			0	0
AK035460	uc009uqr	HGC	0.83	154	0
Paqr11	uc007kwn			0	0
Phxr1	uc008iec			0	0
AK039958	uc008ltq	HGC	0.79	123	148
	AK051469			0	0
BC078436	uc007oyk			0	0
	AK043575			0	0
AK088368	uc008czh			0	0
	AK012752			0	0
	AK031434			0	0
	BC006792			0	0
	AK049415			0	0
AK040948	uc008scb			0	0
AK044653	uc009czg	HGC	0.85	126	0
	X07808			0	0
	AK080436	HGC	1.06	192	0
	AK046449			0	0
	AK044510			0	0
Rassf8	uc009ers			0	0
	AK018017			0	0
	AK083892			0	0
AK010368	uc007lef			137	0
	AK008862			0	0
	AK050761			0	0
	AK019501			0	0
	AK172723			0	0
	AK019848			121	0
Ptch1	uc007qxu			0	0
	AK032929			0	0
	AK051400			0	0
	AK082938			0	0
	AK042305			0	0
	AK013579			0	0
	AK039696			0	0
AK162599	uc009lxf	HGC	0.84	153	0
	AK054505			0	0
	AK041313			0	0
	AK008669	HGC	1.17	138	160
	AK086698			0	0
	AK049712			117	0
AK049041	uc007bkf	HGC	0.79	203	0
AK078606	uc007lbl	HGC	0.87	139	240
AK205936	uc009iln			0	0
	AK032444			111	0
BC033430	uc007dva			0	0
	BC094579			132	0
AK050809	uc009euf			158	0
	AK053683			0	0
AK076253	uc009dih			0	0
1700025G04Rik	uc007czd	HGC	0.84	128	0
	AK080477			0	0
	AK035834			0	0
	AY039009			0	0
AK132630	uc007nec	HGC	0.98	0	0
	AK017535			0	0
	AK020200			0	0
	AK054377			0	0
	AK048353	HGC	0.78	207	0
Arhgef4	uc007apg	HGC	0.86	122	0
	AK053038			0	0
	AK085453			0	0
Creb3l2	uc009bje			0	0
	AK016049			0	0
AK150559	uc007bgn			0	0
	AK046910			0	0
	AK033336	HGC	0.75	133	0
Gtl2	uc007paq			116	181
	AK020957			0	0
	AK076294			0	0
	AK012473			0	0
	AK020160			0	0
	AK054238			0	0
	AK088568			0	0
	AK053676			106	0
AK031165	uc009evk	HGC	0.96	380	0
	AK142969			0	0
	AK033584			0	0
	AK052513			0	0
Gm5643	NR_002883	HGC	0.98	313	0
	AK163456			0	0
	AK053216	HGC	0.7	199	151
	AK089571			0	0
	AK083002			0	0
	AK030568			0	0
	AK033350			0	0
	AK088394			0	0
	AK037532	HGC	0.84	138	0
	AK036157			0	0
	BC054084			0	0
6720401G13Rik	NR_026976			397	0
Airn	uc008alb	HGC	0.83	144	0
AK202543	uc009rya			0	0
	AK020106			171	145
	AK011983			0	0
	BC060604	HGC	0.83	0	0
	AK052717			0	0
	AK089321	HGC	0.74	235	0
	AK044494			0	0
	AK031441	HGC	0.89	201	0
	AK020220			0	0
	AK032566			0	0
	AK008676			0	0
AK040224	uc009lkz	HGC	0.87	0	126
mKIAA1125	uc008nyh			114	0
Gm10052	NR_002885	HGC	0.98	313	0
	AK020424			0	0
AK138811	uc007ixa	HGC	0.89	115	0
	AK043387			0	0
	AK078757			0	0
AK144087	uc009lor			0	0
	AK017285			0	0
	AK078562			0	0
	AK035737			0	0
	AK140938	HGC	0.99	218	0
	AK017434			0	0
	AK086137			0	0
	AK046760			0	0
	AK008245			0	0
	AK018045	HGC	1.26	233	0
	AK053304	HGC	0.99	275	0
AK011568	uc007kry	HGC	0.88	176	150
	AK017428			102	0
	AK051822			0	0
	AK053200			0	0
	AK082536			0	0
	AK035727			0	0
AK086911	uc007cdl			0	0
AK007605	uc007pmx	HGC	0.88	308	0
	AK034235			0	0
AK080655	uc009hfb			0	0
AK197526	uc009cuu			0	0
	AK020735			171	220
2310073E15Rik	uc009lyv	HGC	1.1	200	0
Gtl2	uc007pav			111	0
BC024571	uc008kbg			0	0
	AK029259			0	0
	AK035284			0	0
	AK037386	HGC	0.84	128	0
	AK044044	HGC	0.99	172	0
	AK017961			0	0
	AK136560			0	0
	AK031039	HGC	1.01	193	156
	AK087528			510	169
	AK008366			107	0
	AK086859	HGC	0.82	126	0
	AK019879			0	0
Sept11	uc008yec			0	0
	AK028306	HGC	0.92	184	0
	AK020116			0	0
	AK045150			0	0
	AK134157			103	0
	AK013771	HGC	1.01	185	162
	BC060148	HGC	0.98	348	0
	AK089140			0	0
	AK053128			0	0
	AK083676			0	0
	AK077879			0	0
	AK011228	HGC	1.09	155	0
	AK019973			0	0
Mrmt1	uc009gsi			209	0
AK003723	uc009tar			0	0
	AK078021			0	0
AK079263	uc008eyu			0	0
AK050859	uc009ttp	HGC	0.9	234	0
	AK053821	HGC	1.01	198	0
	AK048140	HGC	0.97	332	0
	AK011173	HGC	1.01	183	0
	AK031438			0	0
	AK051507			114	0
	AB076245			0	0
Mcart6	uc009ujp	HGC	0.84	299	272
LOC100270707	NR_026741			201	0
	AK078629			0	0
AK139799	uc008wuz			106	0
	AK021040			0	0
	AK011858			0	0
	AK045533			0	0
AK087248	uc009gsj	HGC	0.89	209	0
	AK052455			0	0
Chd6	uc008nro			0	0
	AK162395			0	0
	AK140693			177	0
LOC626832	uc008ohg			0	0
	BC071254			0	0
	AK017499			0	0
	AK030733			0	0
	AK037153			0	0
Gtl2	uc007pat			0	0
	AK083199			0	0
AK017924	uc007bft	HGC	1.16	144	0
	AK083616			0	0
	AK084102			0	0
AK017440	uc007pbc			0	0
	AK035288			0	0
	AK013713			0	0
AK008866	uc008sxb			130	0
	AK008796			0	0
	AK047021			213	220
AK010122	uc009clm			0	0
	AK052676			338	0
	AK047425			0	0
	AK047526			0	0
	AK052106			0	0
	AK033072			0	0
	AK004787			0	0
	AK033148			0	0
	AK018000			0	0
	AK031095			0	0
	AK028893			0	0
	AK012671			104	0
	AK053030	HGC	1.06	133	178
AK011693	uc007mla	HGC	1.14	147	0
	AK034805			0	0
	AK084320			0	0
	AK040785			220	0
	AK041509			108	0
	AK142841			0	0
AK131831	uc007orz	HGC	0.94	0	0
	AK076289			0	0
Scs	uc009dab			0	0
AK018309	uc007ndh	HGC	0.84	0	0
	AK038360			0	0
	AK019832			0	0
	AK033357			0	0
	AK043413			0	0
	AK078847			0	0
	AK020581	HGC	0.92	199	0
AK166773	uc008ofk			0	0
	AK048598			145	0
	AK041557			0	0
	AK080586			0	0
	AK078537	HGC	0.92	124	111
AK076597	uc009bzn			0	0
	AK019926			0	0
	AK048740			145	0
AK079958	uc007uwp			0	0
	AK080917			0	0
	AK053707	HGC	0.9	190	0
Dnase2a	uc009mob			0	0
	AK049261			0	0
	AK020546			147	228
	AK049046			0	0
AK004221	uc009nrm			0	0
AK043361	uc009qaf	HGC	0.86	263	0
AK138135	uc007fpd	HGC	0.87	108	0
	AK014035			131	0
AK014726	uc008dyg	HGC	0.75	164	0
	AK052537			0	0
	AK078742			0	0
	AK038732			0	0
	AK036616	HGC	1.09	199	0
AK011460	uc008awt			188	0
	AK037105			0	0
AK136927	uc007gua			0	0
	AK090328	HGC	0.74	144	162
BC028804	uc008fma			0	0
Caper	uc008nmw	HGC	1.03	215	0
	AK084380			0	0
	AK165901	HGC	0.82	0	183
	AK047606			0	0
	AK035372			0	0
	AK008102			167	120
AK129160	uc009buo			144	0
	AK017560			0	0
	AK021356			0	0
	AK021064			109	0
	AK052630			0	0
	AK051921			0	0
	AK087552	HGC	0.77	238	0
	AK052723			0	0
	AK082168			0	0
	AK031010			0	0
	AK043966	HGC	0.77	133	0
AK162351	uc009hik			0	0
Ncam1	uc009pjm	HGC	0.71	0	0
	BC096373			0	0
AK159003	uc007xdh	HGC	0.97	112	147
	AK033115			0	0
	AK051204			0	0
	AK077830			116	0
	AK017960			0	0
	BC066049			0	0
AZ2	uc009rzk	HGC	0.91	212	0
1700012B15Rik	uc007mwh	HGC	1.16	273	0
BC084590	uc009tsy			134	0
	AK014658			0	0
	AK033155			0	0
	AK033161	HGC	0.66	151	138
	AK083553			0	0
	AK133561			0	0
	AK084437			0	0
	AK043701			0	0
AK082779	uc009ubc			0	0
AK020101	uc009gse	HGC	1.01	153	0
AK078466	uc009dii			0	0
Rpl41	uc007hnj	HGC	0.99	0	0
	AK015725			117	0
	AK132080			0	0
Aup1	uc009cma			181	0
BC034252	uc008xqo			0	0
	AK009271			123	0
	AK028520			0	0
	AK038647			0	0
	AK013968			0	0
AK031463	uc008mrt	HGC	0.73	191	0
Phkb	uc009mqh	HGC	0.95	214	0
AK144295	uc007icp			0	244
	AK017916			0	0
	AK172317			0	0
	AK038003			0	0
	AK015104			0	0
	AK048773			0	0
	AK043880	HGC	0.98	216	0
	AK014710			0	0
	AK135606			0	0
	AK084192			0	0
	AK083087			0	0
AK005214	uc007fjw	HGC	1.12	117	0
	AK047900			0	0
	AK043302			0	0
Lemd1	uc007coi	HGC	1.1	148	184
	AK086488			0	0
	AK047585			107	0
Tnrc15	uc007bwq	HGC	0.84	212	0
	AK039502			0	0
Tcrb	uc009bpn			0	0
AK142949	uc008jlk			0	0
	AK053245			0	0
	AK035626			0	0
	AK140834			0	0
	AK011660			0	0
	AK003710			0	0
	AK039736			110	0
AK136017	uc007ile			0	0
	AK036481			0	0
	AK038312			0	0
	AK054058	HGC	0.74	100	188
	AK085648			0	0
	AK012332			0	0
	AK049070	HGC	0.89	164	240
AK054076	uc009cfe	HGC	0.9	142	0
	AK037499			0	0
	AK032859			0	0
	AK031166			0	0
	AK038765			0	0
	AK037318			0	0
	AK035617			0	0
AK194005	uc007zns			0	0
BC002288	uc008mag			226	0
	AK052674	HGC	1.11	157	0
BC058988	uc009sps			0	0
	AK146143	HGC	1.1	136	211
AK142406	uc009tfn	HGC	1.03	114	0
AK146150	uc008kek			0	0
	AK084203			0	0
	AK013655			0	0
	AK036774			0	0
	AK012979			110	244
	AK046762			0	0
	AK082480			0	0
AK017500	uc009srf			173	0
	AK035699			0	0
AK134400	uc009eue			143	0
	AK052617			108	0
	AK028953			329	0
	AK078829			0	0
	AK165095	HGC	0.84	226	0
AK014177	uc007dls	HGC	0.87	168	0
	AK086447			0	0
	AK080938			0	0
	AK087211			0	0
	AK079890			0	0
	AK036574			0	0
	AK084637			0	0
	AK032144			0	0
	AK002304	HGC	0.71	151	0
	AK054328			0	0
BC061253	uc009oqn			0	0
	AK081024			0	0
AK165766	uc008hzy			0	0
AK160548	uc007hyu	HGC	0.88	221	0
Tcrb	uc009bpf			0	0
AK009335	uc009jgw	HGC	1.07	109	150
AK014119	uc009lvh			0	0
	AK046930			0	0
	AK038116			0	0
	AK017619			0	0
	AK031830			0	0
AK033058	uc009had			0	0
	AK035492			0	0
AK029473	uc009cfd	HGC	0.9	142	0
	AK087704			0	0
H4	uc009bpg			0	0
AK043919	uc008ejg	HGC	0.77	160	0
	AK009372			0	0
AK149260	uc007mpy			0	0
	AK018486	HGC	1	0	0
	AK015184			0	0
	AK088223	HGC	1.06	205	0
	AK019982	HGC	0.99	223	0
AK040873	uc007ibg			0	0
	AK028853			0	0
	AK045246			0	0
	AK020216			0	0
	AK047045			0	0
	AK047945			140	0
	AK020250			0	0
	AK018227			111	0
	AK017951			0	0
AK045519	uc007ekf	HGC	1.02	165	0
BC076616	uc009tzw	HGC	1.07	171	0
	AK020313			222	0
	AK168001			0	0
	AK086186			133	0
FAK	uc007wcc	HGC	1.12	264	0
	AK033102			0	0
AK042353	uc009kud			125	0
AK082862	uc008dln			0	0
	AK031341	HGC	0.8	176	122
6720401G13Rik	NR_015505			397	0
	AK030494			0	0
	AK014609			0	0
	AK135056			0	0
	AK050834			0	0
	AK083217	HGC	0.96	179	0
	AK037414			0	0
	AK035670			0	0
	AK052308	HGC	1.13	227	0
	AK084869	HGC	1.07	196	0
	BC106196			0	0
	AK032294			0	0
	AK019943			0	0
2410018L13Rik	uc007nef	HGC	0.88	0	0
AK085172	uc008nnb			0	0
	AK037895			0	0
AK036733	uc008wys			105	0
	AK046705	HGC	0.89	206	0
	AK038070			0	0
	AK020048			0	0
	AK010104			0	0
	AK007736			0	0
	AK018305	HGC	0.71	177	0
	AK155976	HGC	1.03	215	0
	AK052114			0	0
	AK082033			0	0
	AK018137			0	0
AK047175	uc008xuj			0	0
	X16935			0	0
	AK036896	HGC	1.38	233	0
	AK013565			103	0
	AK047496			0	0
	AK049403			0	0
	AK079108			0	0
	AK158356			0	0
Pip5k1a	uc008qhw			0	0
	AK020287			0	0
AK039862	uc007kcg			0	0
	AK020950			0	0
	AK052686			108	0
	AK012901			0	0
AK144330	uc007lsd			125	0
	AK017423			212	169
	AK161112	HGC	0.93	217	0
	AK147814			0	0
	AK039268			144	161
	AK021411			105	0
Pde7b	uc007eoc			102	0
	AK019905			0	0
	AK036007			0	0
AK048089	uc008ued	HGC	0.87	170	217
	AK085151			0	0
	AK013682			0	0
Cd200	uc007zio			171	0
	AK053153			0	0
	AK014176			0	0
	AK032614			0	0
	AK013450			0	0
	AK013908	HGC	0.96	219	0
	AK083427			0	0
	AK082022			114	0
AK039536	uc008icf			155	0
AK009724	uc009csa			0	0
	AK038074			0	0
	AK038251			0	0
AK013162	uc008uzj			0	0
	AK083165			0	0
BC042783	uc009tqf			0	0
	AK040093			0	199
	AK081590			0	0
	AK020650			0	0
	AK020542			162	0
	AK010182	HGC	1.21	265	181
	AK017540			0	0
	AK046282	HGC	1.13	183	0
	AK081027			0	0
	AK027946			162	162
	AK080123			0	0
AK014660	uc007eqv	HGC	0.81	132	0
AK041267	uc009kdm			0	0
	AK018345	HGC	0.95	218	0
	AK083728			0	0
	AK003491			0	0
	AK080554			0	0
	AK053579	HGC	0.97	136	0
	AK020870			0	0
	AK083983			0	0
AK049871	uc009hnh			124	173
AK212208	uc009fyf			0	0
	AK148585	HGC	0.95	106	0
AK050516	uc007mzr			100	0
Tcrg	uc007pov			0	0
	AK013706			0	0
	AK013346			0	0
	AK081614			0	0
	AK033099			0	0
	AK018491			0	0
Ywhag	uc008zzh	HGC	0.9	204	0
	AK013547			0	0
	AK013767			0	0
	AK077974			0	0
AK049068	uc008hod			154	0
AK162386	uc009qwy	HGC	0.8	153	0
	AK034945			0	0
	AK018650			0	0
	AK031157	HGC	0.88	259	0
	AK041851			0	0
AK038731	uc007zgh	HGC	0.79	103	0
	AK039132	HGC	0.92	139	0
	AK039661	HGC	0.91	164	0
	AK031940			0	0
	AK012892			0	0
AK004252	uc007yua	HGC	1.07	334	176
AK148800	uc007zsh			129	0
	BC034330			0	0
	AK033078			0	0
	AK045275			114	206
AK145144	uc007ezc			0	0
	AK039609	HGC	0.95	191	0
AK164331	uc008apc			0	0
AK020061	uc009hnn			0	0
	AK047590			0	0
	AK047905			0	0
BC006965	uc007mea			0	0
	AK031731	HGC	0.7	199	151
	AK020657			0	0
AK042124	uc008yms	HGC	0.93	154	0
	AK052227			0	0
	AK076695			0	0
AK054515	uc007peo			0	0
	AK048761			0	0
	AK048317			0	0
	AK079628	HGC	0.97	206	0
	AK032130			0	0
AK082467	uc007guc			0	0
	BC052788			0	0
	AK017601			0	0
AK132460	uc009tdp			0	0
AK036614	uc008bzl			0	0
	AK018023			0	0
	AK020060			0	0
	AK046963			0	0
	AK017867			0	0
AK162774	uc007idq			0	0
	AK020500	HGC	1	272	0
AK048031	uc007zse			0	0
	AK037391			0	0
LAMP2	uc009szz			207	0
	DQ113646			0	0
	AK036130	HGC	0.91	0	209
	AK046545			163	0
AK050795	uc007hry			0	0
	AK032274			0	0
	AK134035			0	0
Tcrb	uc009bpc			0	0
	AK078845			0	0
	AK087769			0	0
	AK013658			0	0
AK155592	uc008vbk	HGC	0.89	188	0
	AK021120			0	0
	AK144510			110	0
	AK033315	HGC	1.08	108	0
AK208404	uc009uim			151	0
	AK031515			117	0
	AK011493	HGC	0.94	0	0
	AK086371	HGC	0.89	206	0
	AK083865			0	0
	AK052336			0	0
	AK048977			0	0
	AK017987			0	0
	AK086410			0	0
	AK086422			0	0
	AK085198			0	0
	AK090292			158	0
	AK081284			0	0
	AK170049			0	0
	AK132110	HGC	0.8	251	0
	BC106197			0	0
	AK032649	HGC	0.91	171	150
AK007947	uc007jfe			0	0
	AK038502			0	0
	AK044923			0	0
AK084828	uc007msc			0	0
AK144897	uc007ytv			0	0
	AK045751			170	181
	AK084899			152	0
	AK053561			0	0
	AK078202			0	0
	AK149239			0	0
AK050201	uc009tzr	HGC	0.98	177	0
Hps1	uc008hoa			0	0
	AK054167			0	0
AK008724	uc009ura			178	0
	AK045155			0	0
	AK014284			0	0
AK136919	uc007ruh			0	0
	AK034561	HGC	0.83	146	123
	AK004374			0	0
	AK043012			0	0
	AK033438			170	177
AK087382	uc009ets	HGC	1.05	157	0
	AK087447			0	0
	AK031454			0	0
	AK050725			0	0
	AK142855			0	0
	AK012964	HGC	0.7	0	246
	AK089870			0	0
Snhg1	NR_002896	HGC	1.09	199	0
BC119421	uc007xig			0	0
	AK084864			0	0
	AK039909	HGC	0.84	125	0
	AK009865	HGC	0.81	189	0
	BC049988			0	0
	AK086575			0	0
	AK081084			0	0
	AK030655			0	0
	AK140411			0	0
	AK148627			0	0
	AK047630	HGC	1.21	272	0
	AK048564			0	0
AK040602	uc007atk			0	0
AK149295	uc008wsy			0	0
AK172713	uc008ozf			0	0
AK009175	uc008vaz	HGC	0.95	261	0
AK010390	uc007lta			120	0
	AK080623			125	0
	AK038172			0	0
	AK085312			0	0
	AK034202			0	0
	AK034262			0	0
	AK142037			162	157
	AK035881	HGC	0.92	128	162
Btbd19	NR_024078			0	0
	AK087385			0	0
AK033222	uc007zsk			118	278
	AK020414			103	0
	AK034527	HGC	0.81	315	0
	AK033485			112	190
	AK044726	HGC	0.71	162	137
	AK020571	HGC	1.13	191	0
Chchd7	uc008rws	HGC	0.95	193	0
	AK049654			0	0
	AK045358			0	0
	AK012243	HGC	0.86	188	0
	Y17854			0	0
	AK007691			0	0
AK028767	uc007dlt			0	0
	AK033415			0	0
	AK047643			0	0
	AK029225			0	0
	AK081553			131	0
	AK140518			0	0
	AK043752			0	0
AK034200	uc007pwr	HGC	0.94	160	199
AK052076	uc007rpo			0	0
	AK044847			0	0
BC055065	uc008srw			162	0
AK049160	uc008zfa			0	0
	AK018417			0	0
	AK079240			0	0
	AK038091			0	0
	AK140063			0	0
	AK028918			0	0
AK002838	uc007kvp			102	0
	AK082420			121	0
	AK036123			0	0
	AK037549			0	0
	BC037039			0	131
	AK089859			0	0
	AK042118	HGC	1	161	0
	AK017913	HGC	0.92	253	0
AK138201	uc008jko			0	0
	AK047420			0	0
	AK048328			0	0
	AK087003			0	0
	AK013575	HGC	1.01	289	0
	AK013795			0	0
	AK048747	HGC	0.88	203	217
	AK017446			0	0
	AK012039			0	0
Slc25a26	uc009czt			0	0
	AK079493			0	0
	AK021051			0	0
AK076396	uc009lxi	HGC	0.82	156	0
	AK052050			0	0
	AK013077			0	0
	AK012244			0	0
	AK053952			0	0
	BC019134			0	0
	AK020156			329	0
	AK045346			0	0
AK139063	uc007ugi	HGC	0.82	0	183
	BC066226			0	0
A730008H23Rik	uc007byo			140	0
AK162965	uc007jdh	HGC	0.88	280	0
	AK047121			0	0
	AK080924			0	0
	AK020464			0	0
mKIAA0569	uc008jph	HGC	0.81	165	137
AK136742	uc008bzz	HGC	0.76	245	0
AK143097	uc007ugf			0	0
	AK044751			0	0
	BC029975			0	0
	AK076131			0	0
Cflar	uc007bcr	HGC	0.84	166	0
	AK047823			0	0
	AK080243			0	0
	AK089612			0	0
	BC048953			0	0
	AK034767			0	0
	AK018186			0	0
	AK089149			0	0
	AK032623			0	0
	AK038861			0	0
	AK013657	HGC	0.83	105	188
	AK087250			0	0
AK090016	uc007gqf	HGC	0.96	169	0
	AK028406			0	0
1810014B01Rik	NR_015572	HGC	0.96	169	0
	AK162901			0	0
	AK085079			0	0
	AK052510			0	0
	AK036075			104	0
AK044376	uc009ldl			0	0
	AK051489			0	0
IIGP	uc008fab			0	0
	BC037747			0	0
	AK031784			0	0
	AK137938			0	0
	AK017178			0	0
	AK083870			0	0
	AK085973	HGC	0.87	109	0
AK080292	uc008rzc	HGC	1.01	271	0
	AK031288			0	0
	AK031998			0	0
IKKbeta	uc009ldv	HGC	0.98	169	0
	AK008061			0	0
	AK163795			146	0
	AK017986			0	0
	AK032538			0	0
	AK053912			0	0
	AK039045			0	0
	AK148051			136	0
AK079777	uc009jxt			0	0
	AK017326			0	0
