# Supplementary material for: Long Non-Coding RNA Expression Profiling of Mouse Testis during Postnatal Development
Source: PLoS One. 2013 Oct 10;8(10):e75750. doi: 10.1371/journal.pone.0075750 (PMC3794988; doi:10.1371/journal.pone.0075750)
Supplement: Table S12 — List of primers used in the validation of microarray results by Q-PCR. (XLS) [file pone.0075750.s015.xls]

## Sheet: Sheet1
Gene Symbol	Sequence (5’–3’)		Amplicon length (bp)
	Forward	Reverse
AK011865	CCACTTCAAATGGGGAGGGT	GTGATTTGGGACACTGGAGAGAC	182
AK006530	CAAGTGCCTGGGATTGTGGATAC	CAGCCCACTGTCCAGGTCATCTC	211
AK053216	GCCCAAGCGGTCACTCAGTATCA	AGTGGTTCAAGTTACTGCCGCTG	287
AK018942	GCCTTTCCCAAATGTCTGTTCCT	TCAGGTTCAGGGAGTGCTTCTTT	245
AK006015	GCCACACCACCATCCACTATT	GGAGGCGAAACCAGGTAGATT	161
AK004447	TGTAGCATCAAACATTCACGGA	GACAGAAGGACACAGGGCAAAC	196
AK033245	CAAACCCGCAGTTCTTCTCCTT	AGTGCCAGCCCGAGTTGTTC	205
AK140218	TTTACAAAAGGGAAAACTGAGGC	TAGGCTGATAAAGGGCTCAAAGTT	196
GAPDH	GTCGTGGAGTCTACTGGTGTC	GAGCCCTTCCACAATGCCAAA	240
